# Supplementary material
Source: PubMed Central journal article supplement (PMC6187413)

NGJ-7-011 (DMSO, 400 MHz) Crude Yellow Solid - bromination of 2-methyl quinolin-4-ol

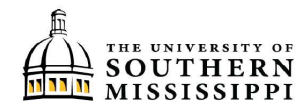

NAME NGJ-7-011  
EXPNO 20  
PROCNO 1  
Date\_ 20170329  
Time\_ 18.03 h  
INSTRUM spect  
PROBHD Z108618\_0161 (   
PULPROG zg30  
TD 65536  
SOLVENT DMSO  
NS 16  
DS 2  
SWH 8012.820 Hz  
FIDRES 0.244532 Hz  
AQ 4.0894966 sec  
RG 203  
DW 62.400 usec  
DE 6.50 usec  
TE 298.9 K  
D1 1.00000000 sec  
TD0 1  
SF01 400.1724710 MHz  
NUC1 1H  
P1 9.88 usec  
SI 65536  
SF 400.1700007 MHz  
WDW EM  
SSB 0  
LB 0.30 Hz  
GB 0  
PC 1.00

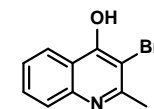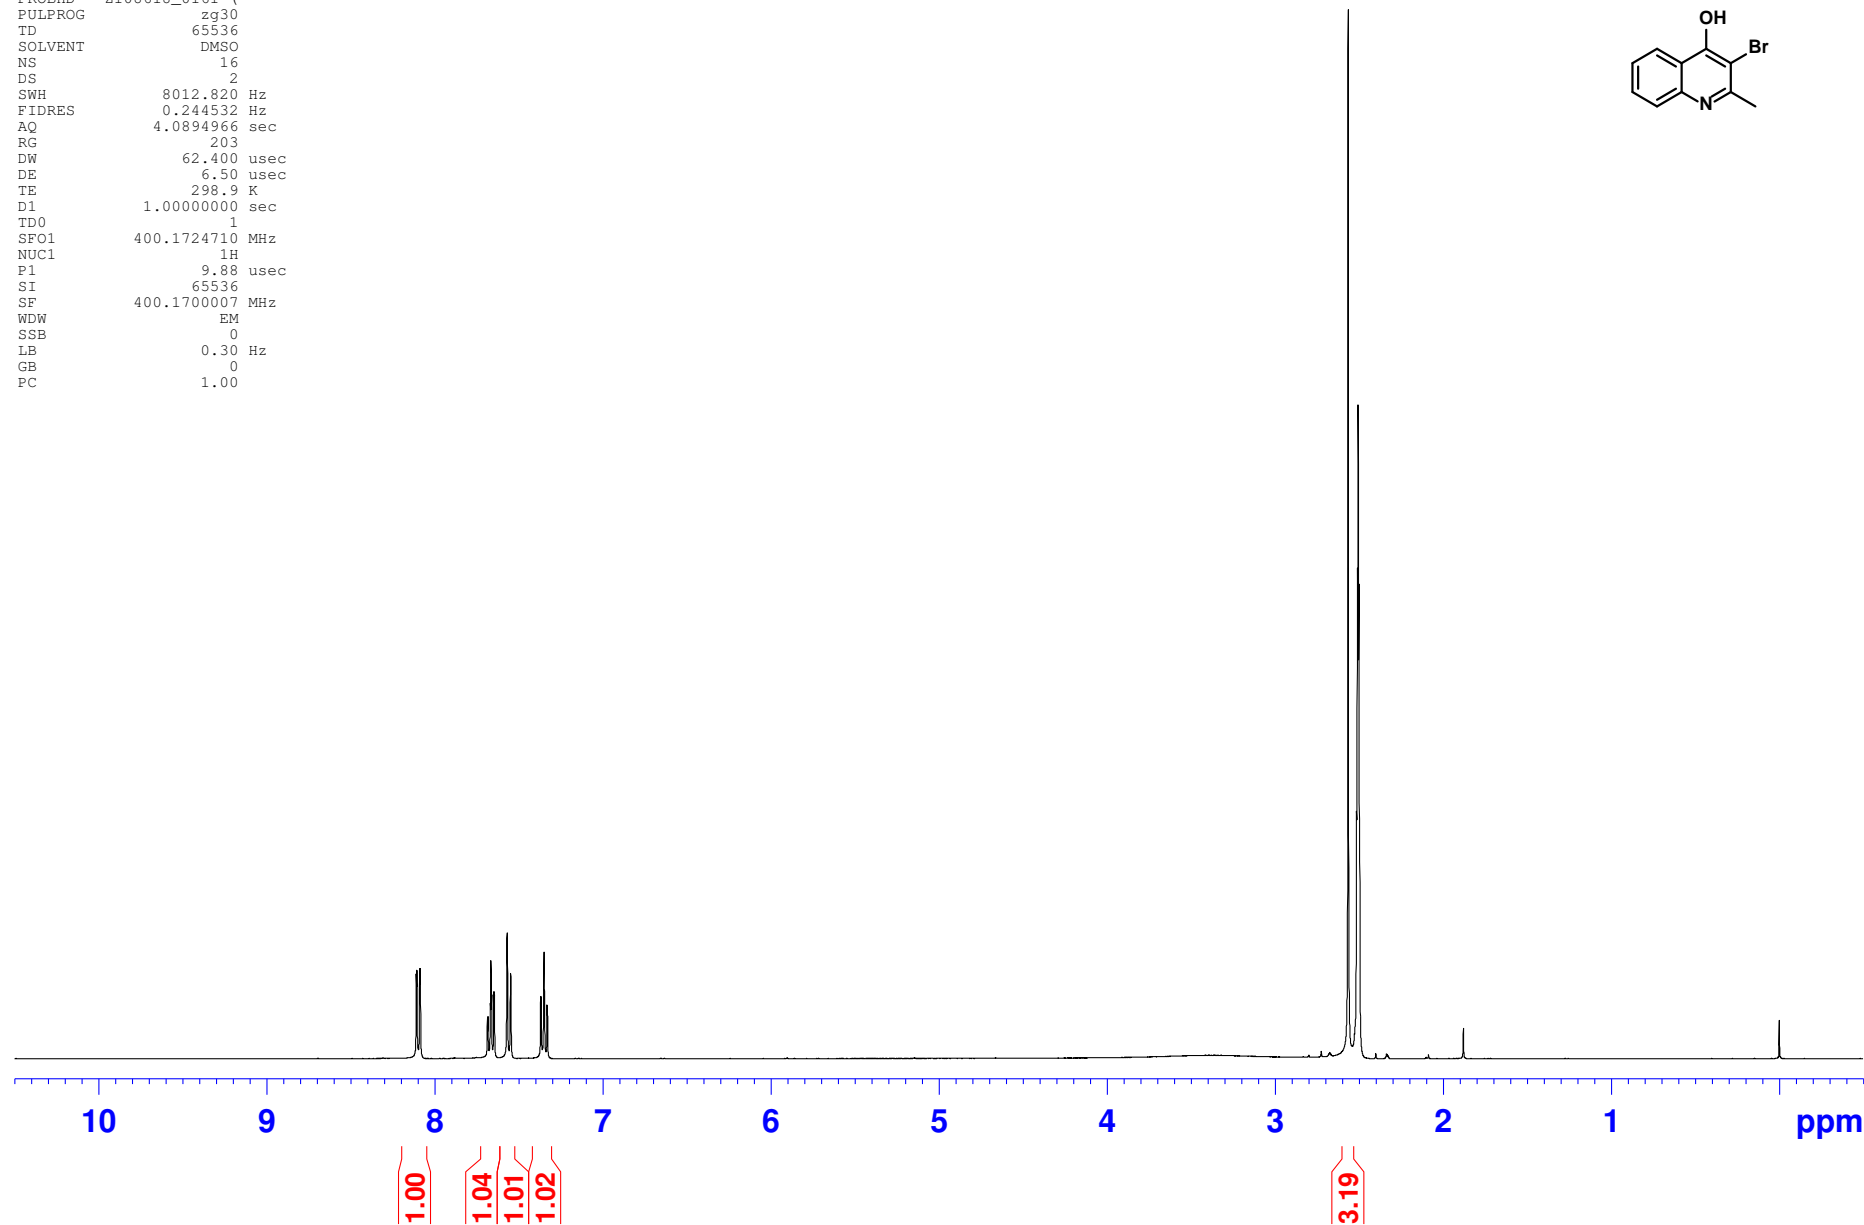

NGJ-7-011 (DMSO, 400 MHz) Crude Yellow Solid - bromination of

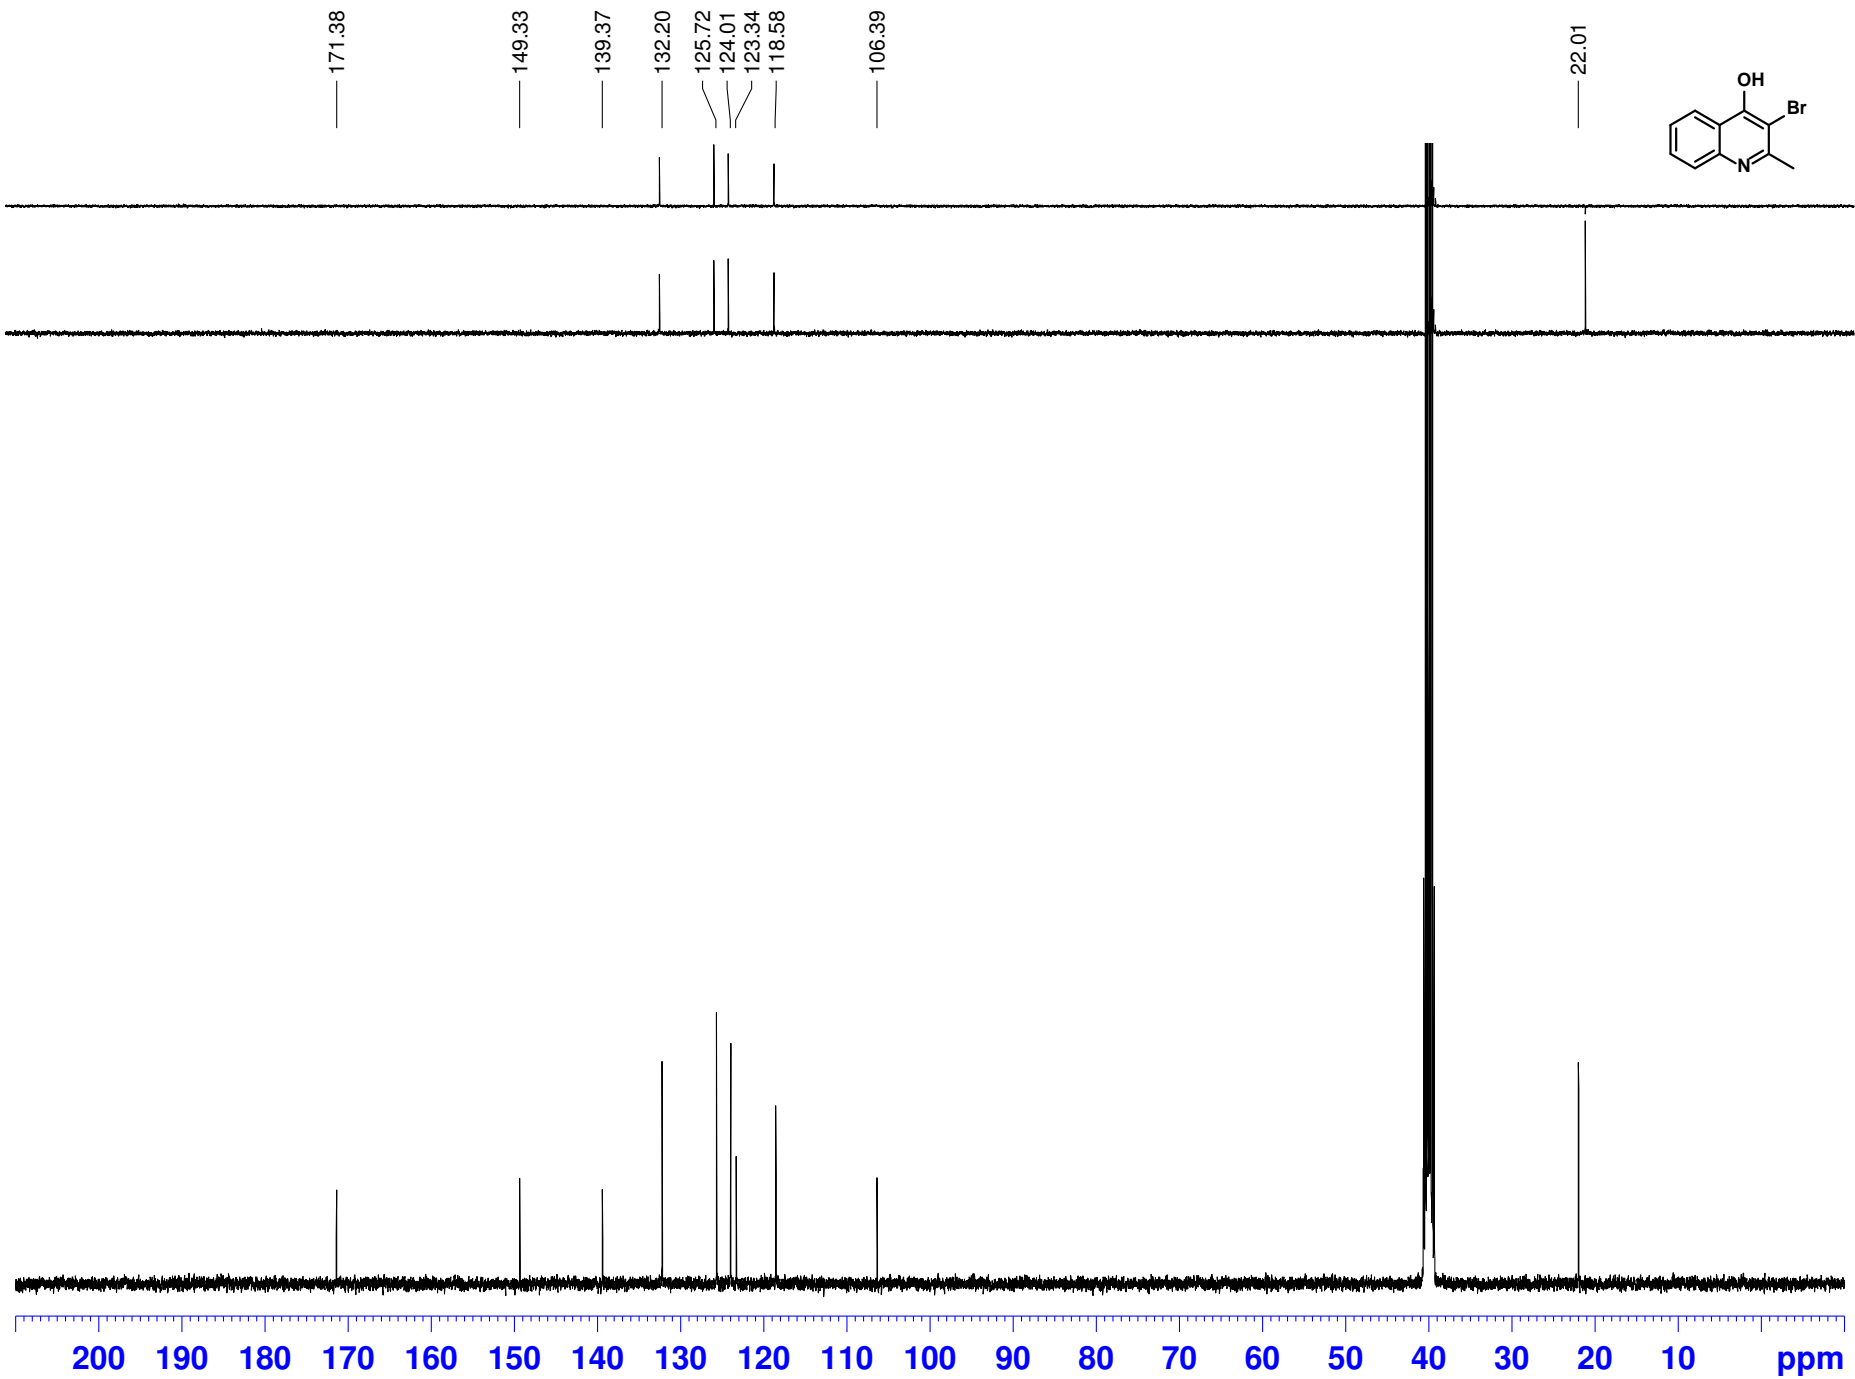

NGJ-7-012 (CDC13, 400 MHz) White Solid - chlorination of 3-bromo-2-methylquinolin-4-ol

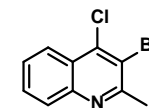

NAME NGJ-7-012  
EXPNO 20  
PROCNO 1  
Date\_ 20170330  
Time\_ 22.08 h  
INSTRUM spect  
PROBHD Z108618\_0161 (   
PULPROG zg30  
TD 65536  
SOLVENT CDC13  
NS 16  
DS 2  
SWH 8012.820 Hz  
FIDRES 0.244532 Hz  
AQ 4.0894966 sec  
RG 161  
DW 62.400 usec  
DE 6.50 usec  
TE 297.3 K  
D1 1.00000000 sec  
TD0 1  
SF01 400.1724710 MHz  
NUC1 1H  
P1 9.88 usec  
SI 65536  
SF 400.1700075 MHz  
WDW EM  
SSB 0  
LB 0.30 Hz  
GB 0  
PC 1.00

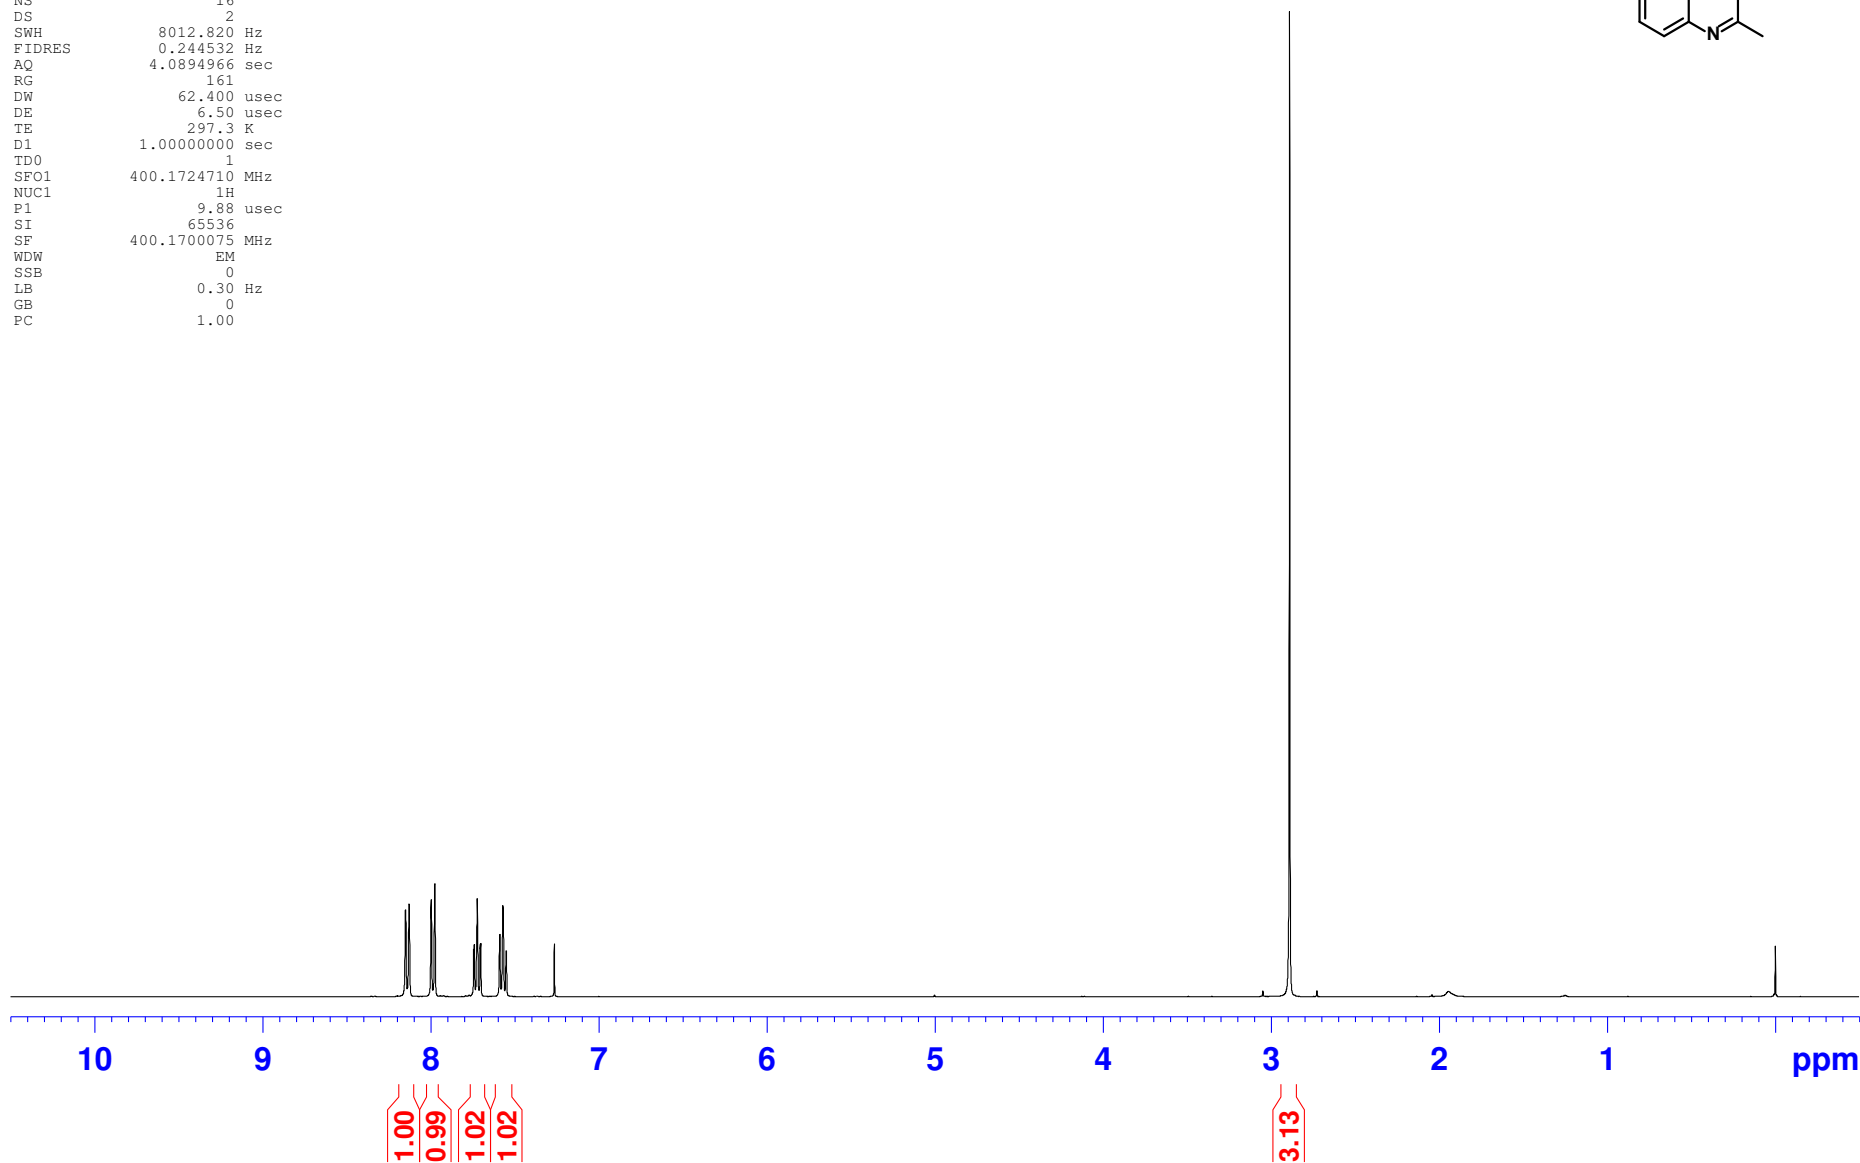

NGJ-7-012 (CDCl<sub>3</sub>, 400 MHz) White Solid - chlorination of 3-br

158.17  
146.43  
142.04  
130.31  
129.06  
127.51  
125.95  
124.51  
119.75

27.42

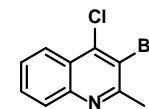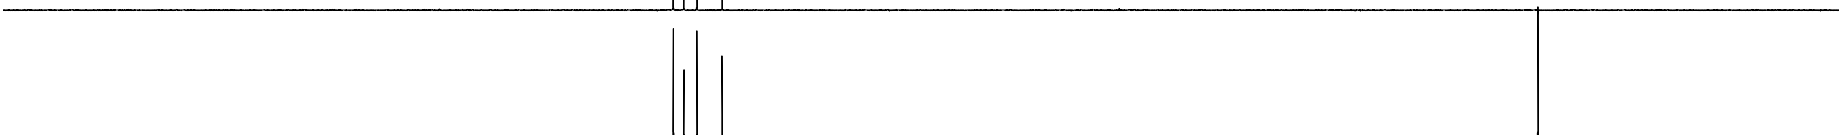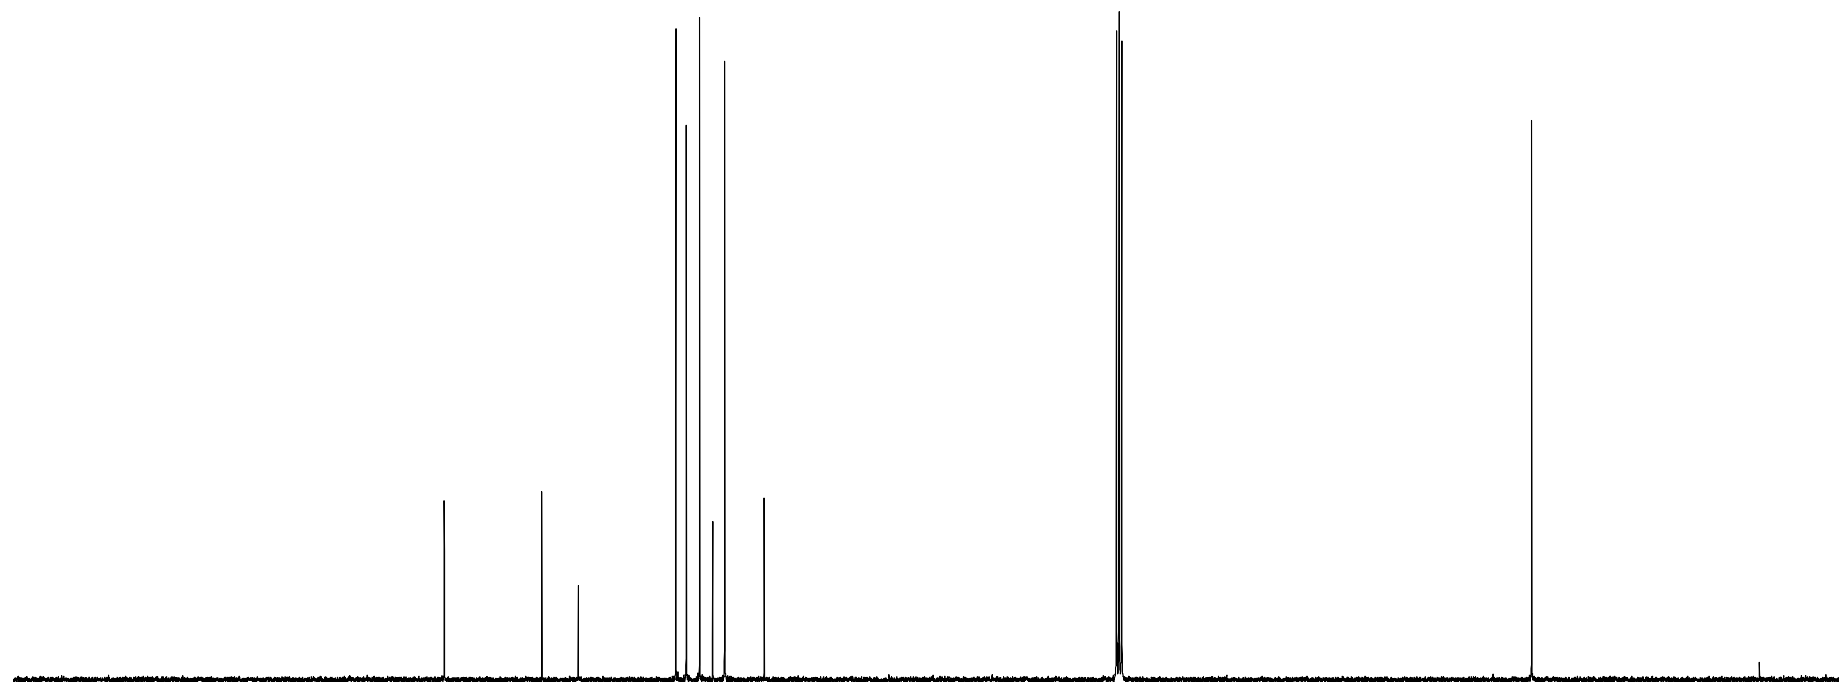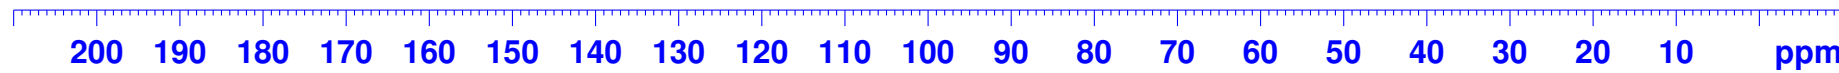

NGJ-7-018 (CDC13, 400 MHz) Pure Yellow Oil - grignard reaction with oxalyl chloride



NAME NGJ-7-018  
EXPNO 30  
PROCNO 1  
Date\_ 20170410  
Time\_ 18.39 h  
INSTRUM spect  
PROBHD Z108618\_0161 (  
PULPROG zg30  
TD 65536  
SOLVENT CDC13  
NS 16  
DS 2  
SWH 8012.820 Hz  
FIDRES 0.244532 Hz  
AQ 4.0894966 sec  
RG 181  
DW 62.400 usec  
DE 6.50 usec  
TE 297.6 K  
D1 1.00000000 sec  
TD0 1  
SF01 400.1724710 MHz  
NUC1 1H  
P1 9.88 usec  
SI 65536  
SF 400.1700060 MHz  
WDW EM  
SSB 0  
LB 0.30 Hz  
GB 0  
PC 1.00

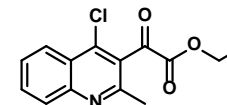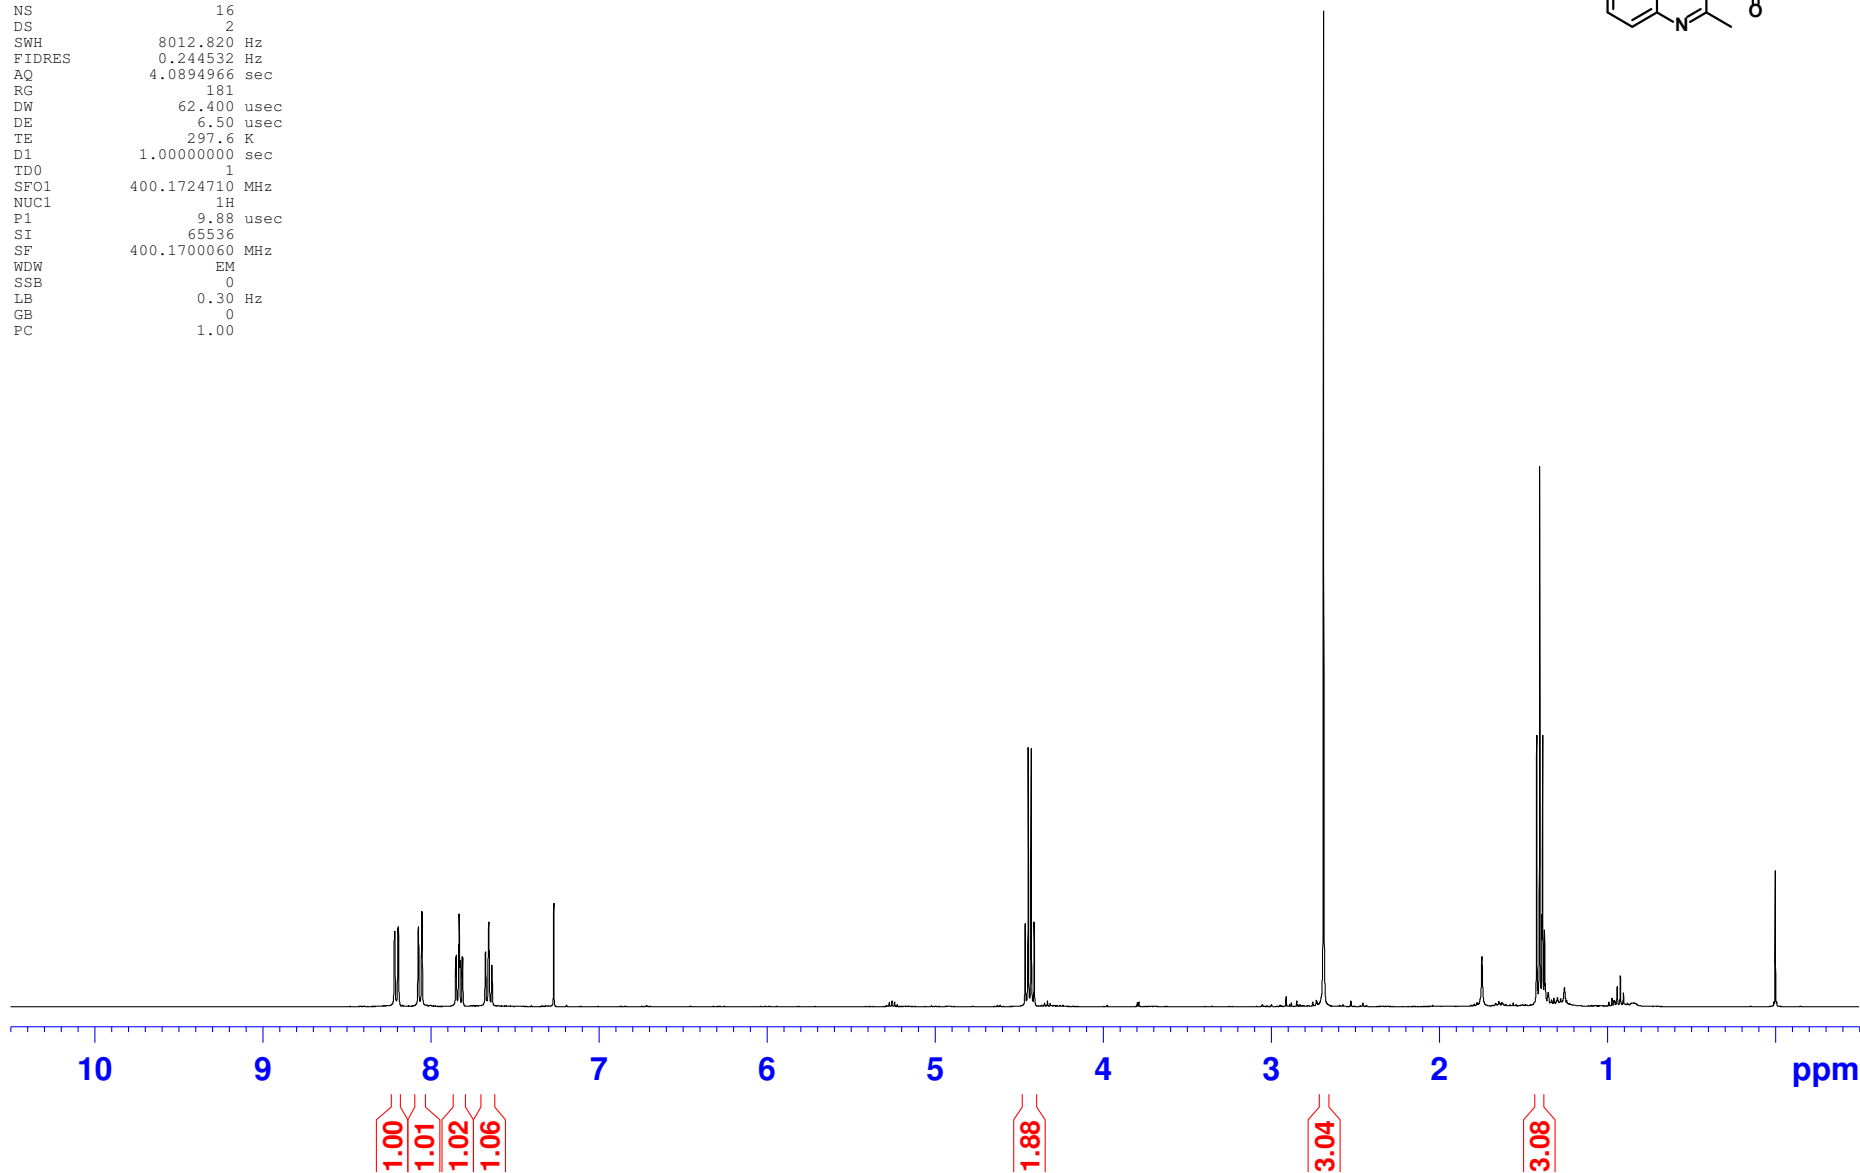

NGJ-7-018 (CDCl<sub>3</sub>, 400 MHz) Pure Yellow Oil - grignard reactor

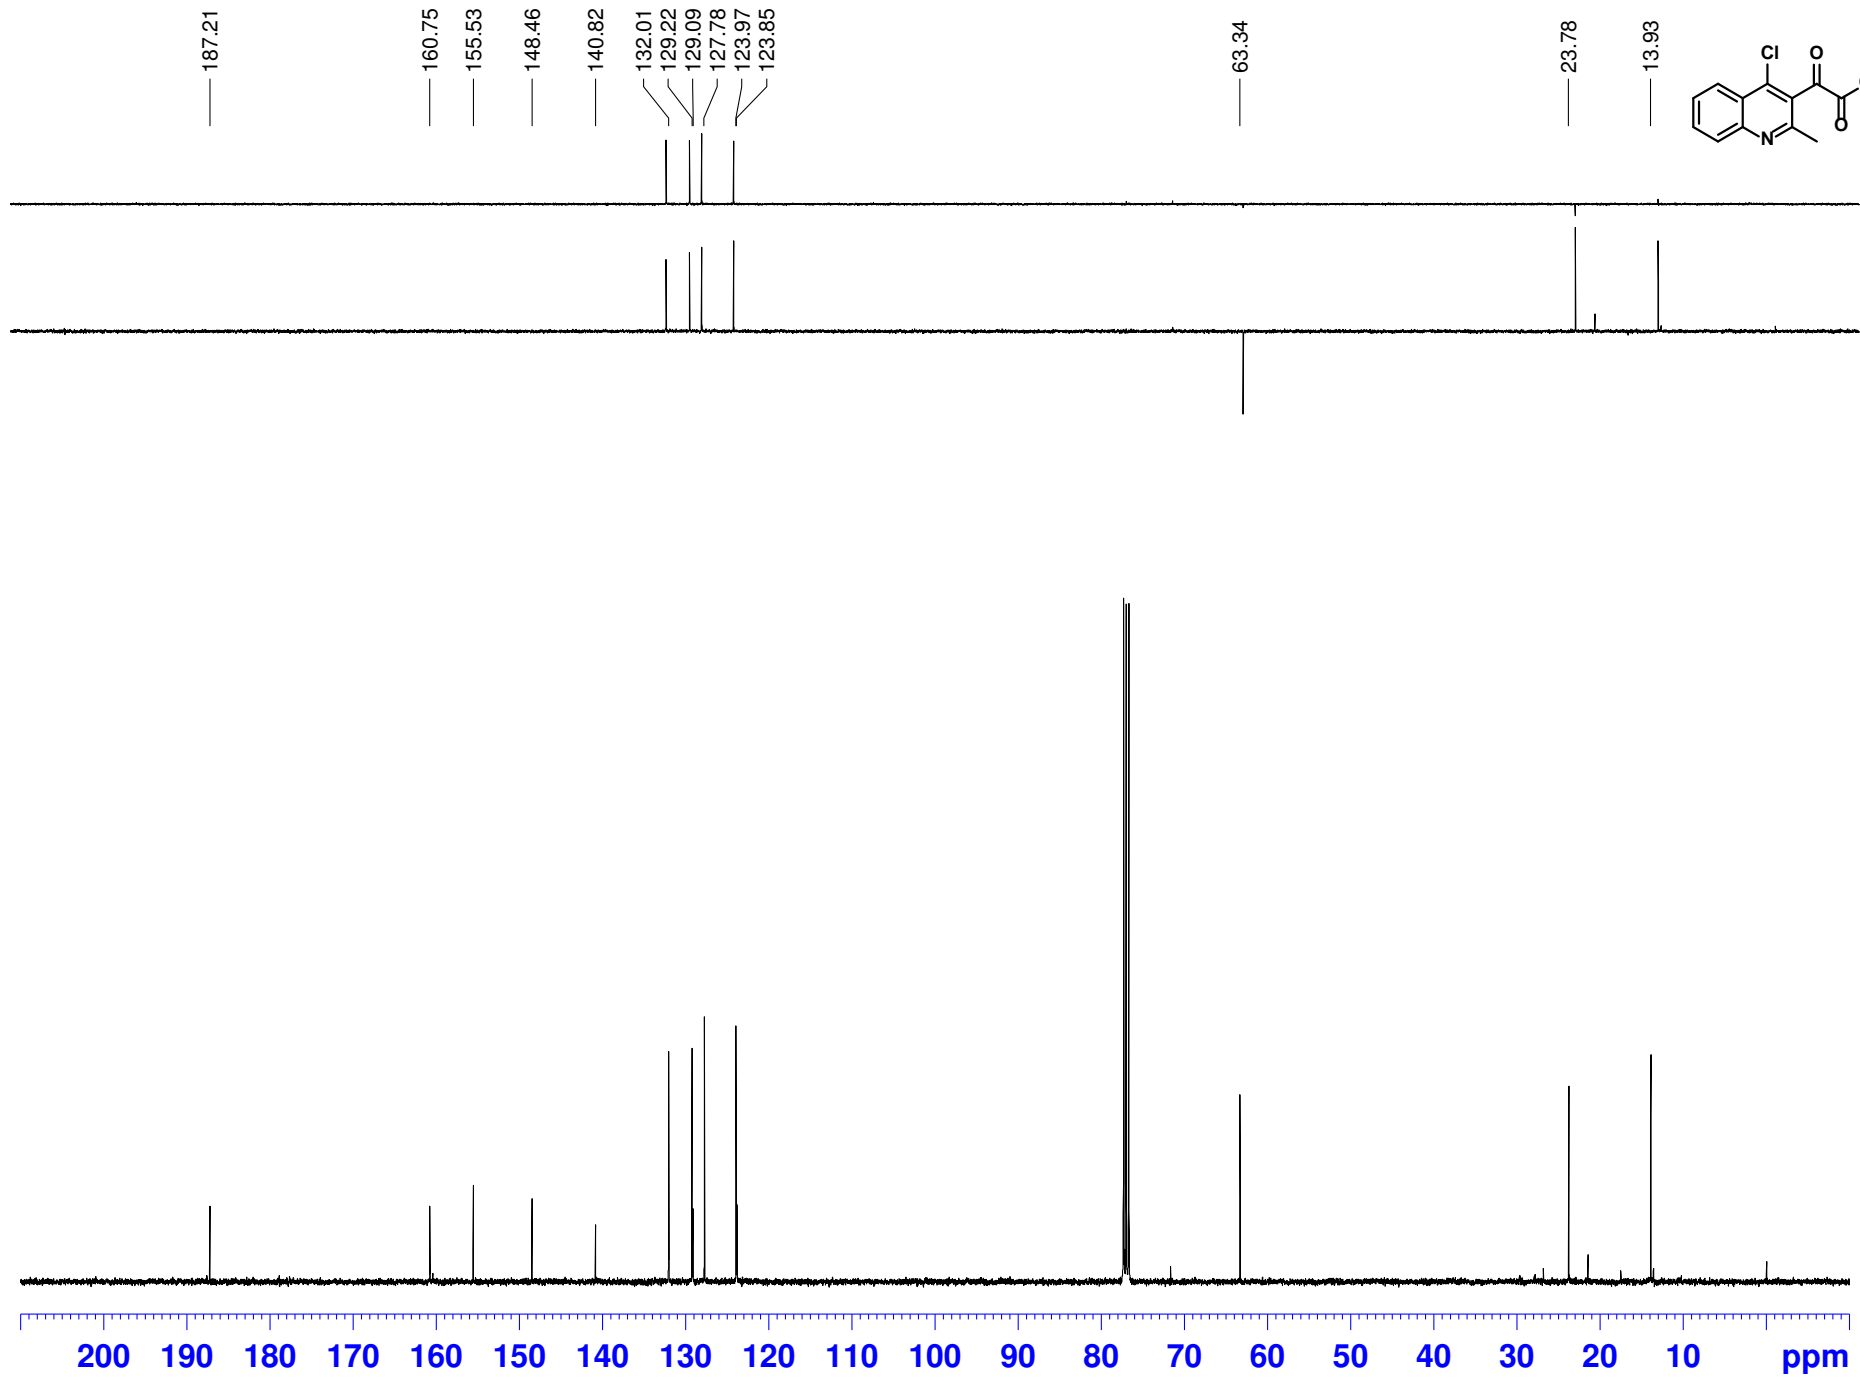

NGJ-7-027 (CDC13, 400 MHz) Pure Yellow Oil - NaBH4 reduction

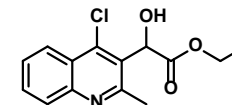

NAME NGJ-7-027  
EXPNO 20  
PROCNO 1  
Date\_ 20170418  
Time\_ 17.52 h  
INSTRUM spect  
PROBHD Z108618\_0161 (   
PULPROG zg30  
TD 65536  
SOLVENT CDC13  
NS 16  
DS 2  
SWH 8012.820 Hz  
FIDRES 0.244532 Hz  
AQ 4.0894966 sec  
RG 203  
DW 62.400 usec  
DE 6.50 usec  
TE 297.8 K  
D1 1.00000000 sec  
TD0 1  
SF01 400.1724710 MHz  
NUC1 1H  
P1 9.88 usec  
SI 65536  
SF 400.1700075 MHz  
WDW EM  
SSB 0  
LB 0.30 Hz  
GB 0  
PC 1.00

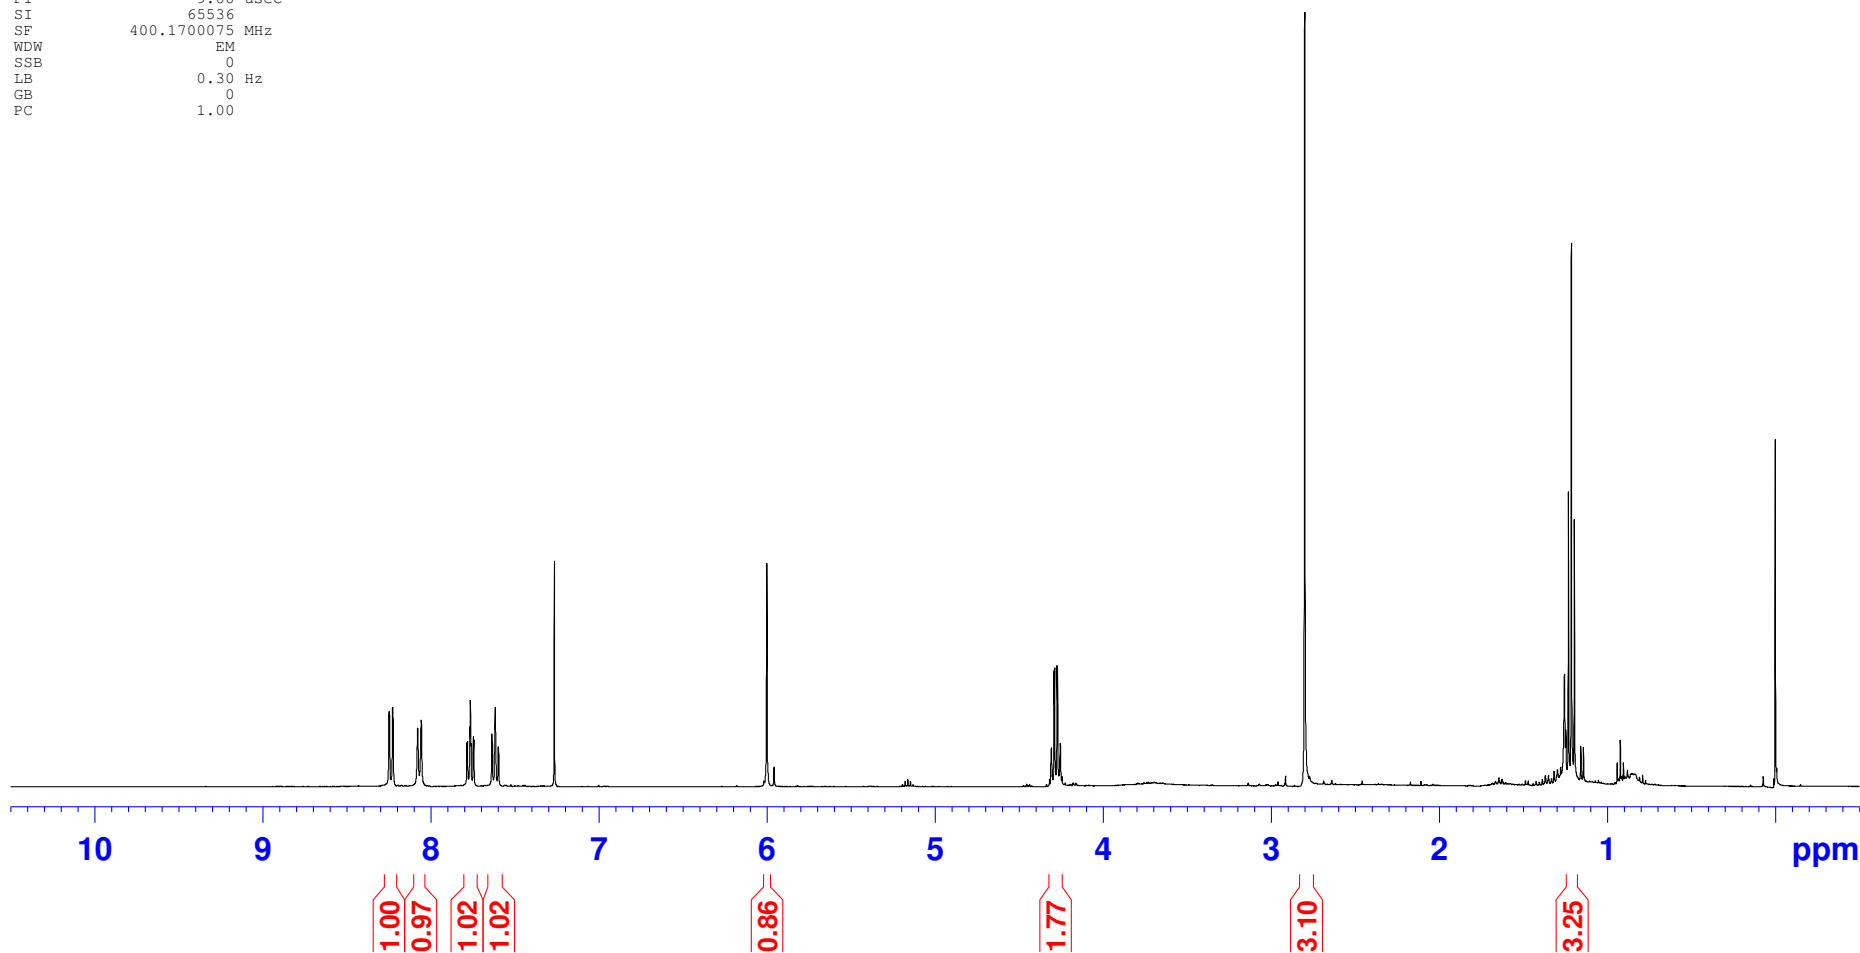

NGJ-7-027 (CDCl<sub>3</sub>, 400 MHz) Pure Yellow Oil - NaBH<sub>4</sub> reduction

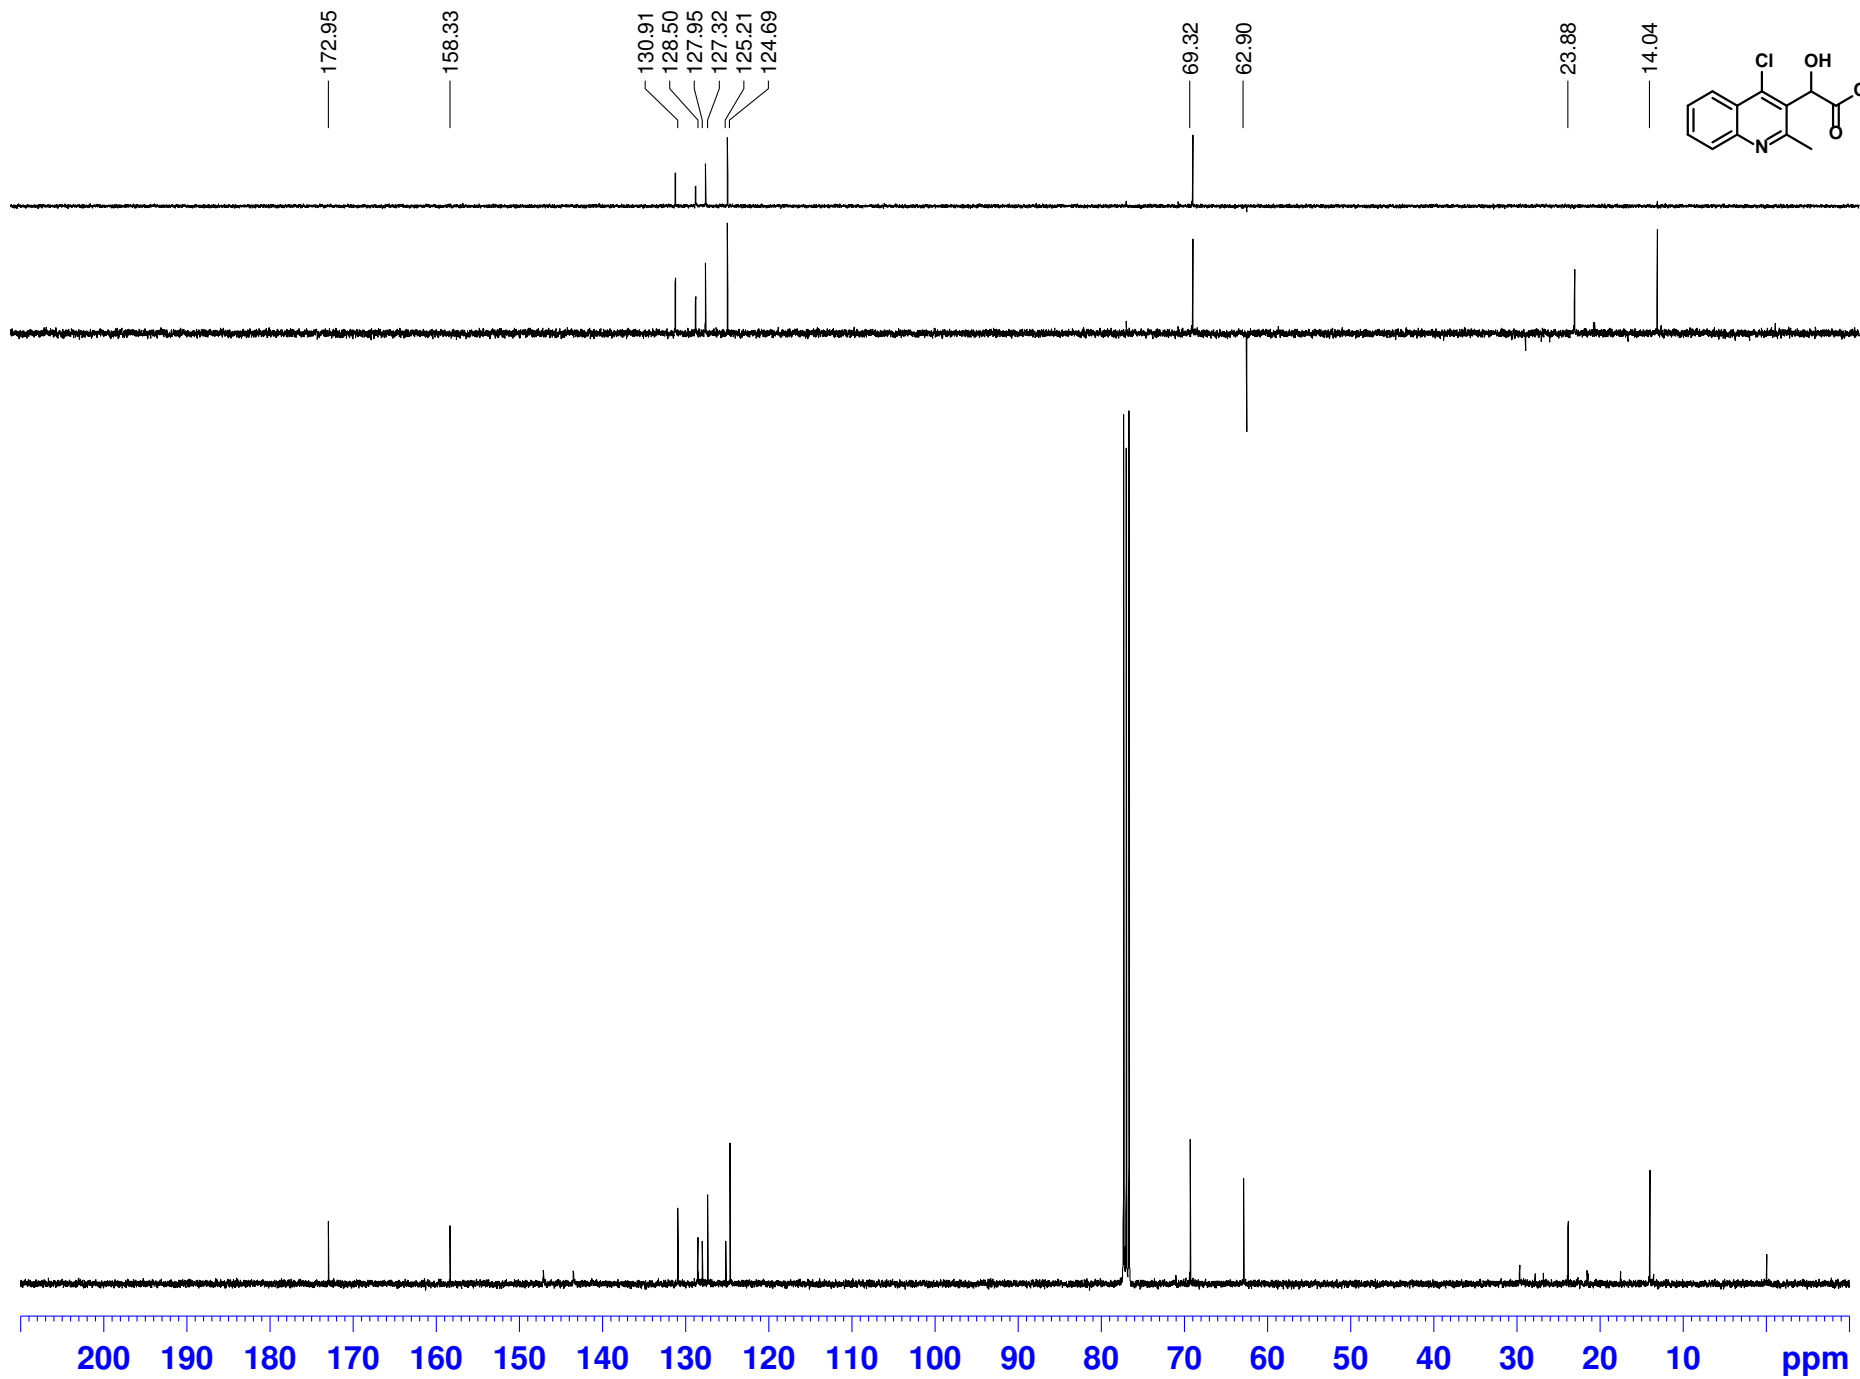



NGJ-7-046 (CDC13, 400 MHz) Brown Oil - transhalogenation of 4-chloroquinoline



NAME NGJ-7-046  
EXPNO 20  
PROCNO 1  
Date\_ 20170505  
Time\_ 17.28 h  
INSTRUM spect  
PROBHD Z108618\_0161 (   
PULPROG zg30  
TD 65536  
SOLVENT CDC13  
NS 16  
DS 2  
SWH 8012.820 Hz  
FIDRES 0.244532 Hz  
AQ 4.0894966 sec  
RG 203  
DW 62.400 usec  
DE 6.50 usec  
TE 296.1 K  
D1 1.00000000 sec  
TD0 1  
SF01 400.1724710 MHz  
NUC1 1H  
P1 9.88 usec  
SI 65536  
SF 400.1700078 MHz  
WDW EM  
SSB 0  
LB 0.30 Hz  
GB 0  
PC 1.00

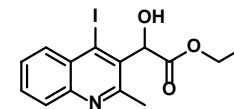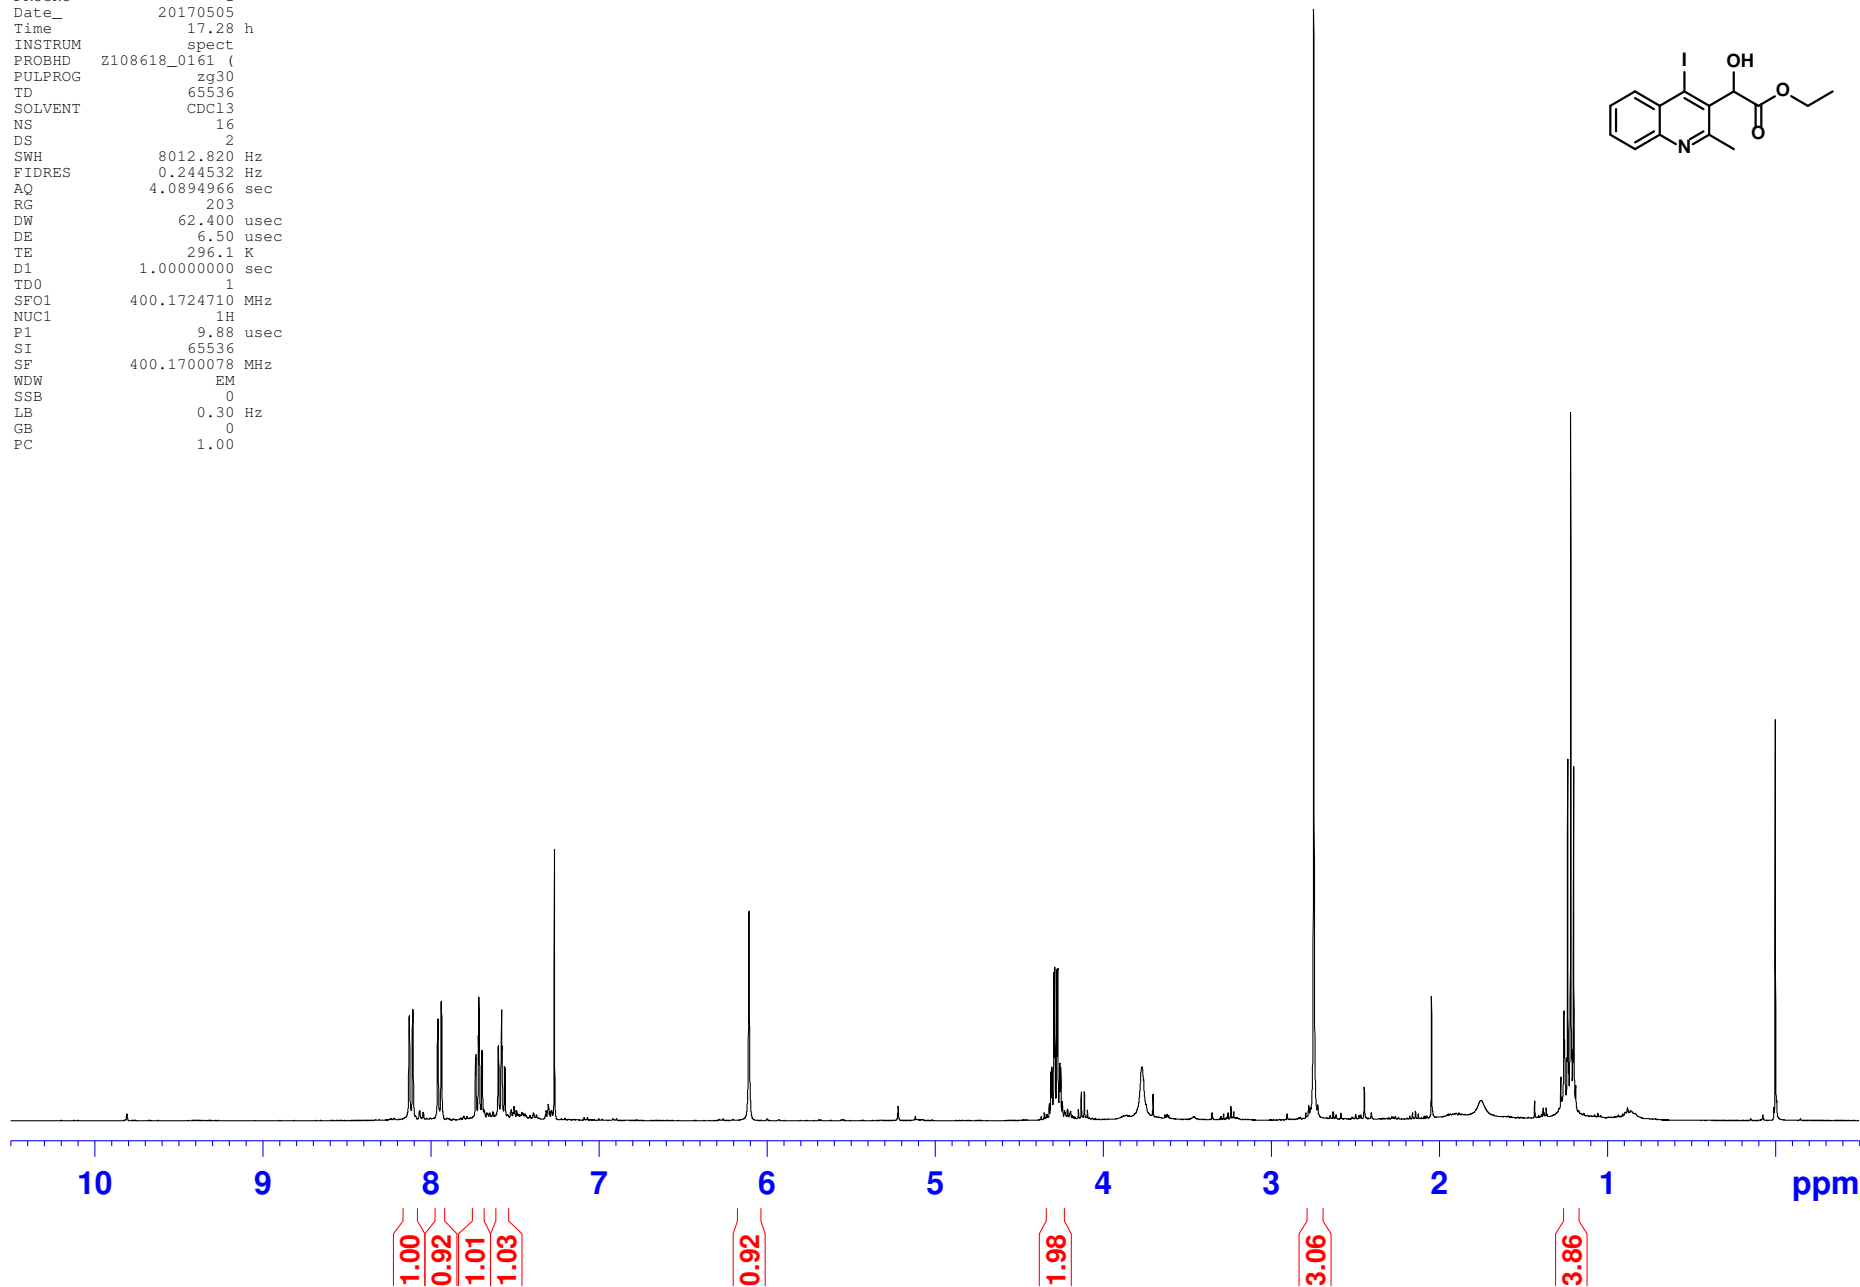

NGJ-7-046 (CDCl<sub>3</sub>, 400 MHz) Brown Oil - transhalogenation of 4-

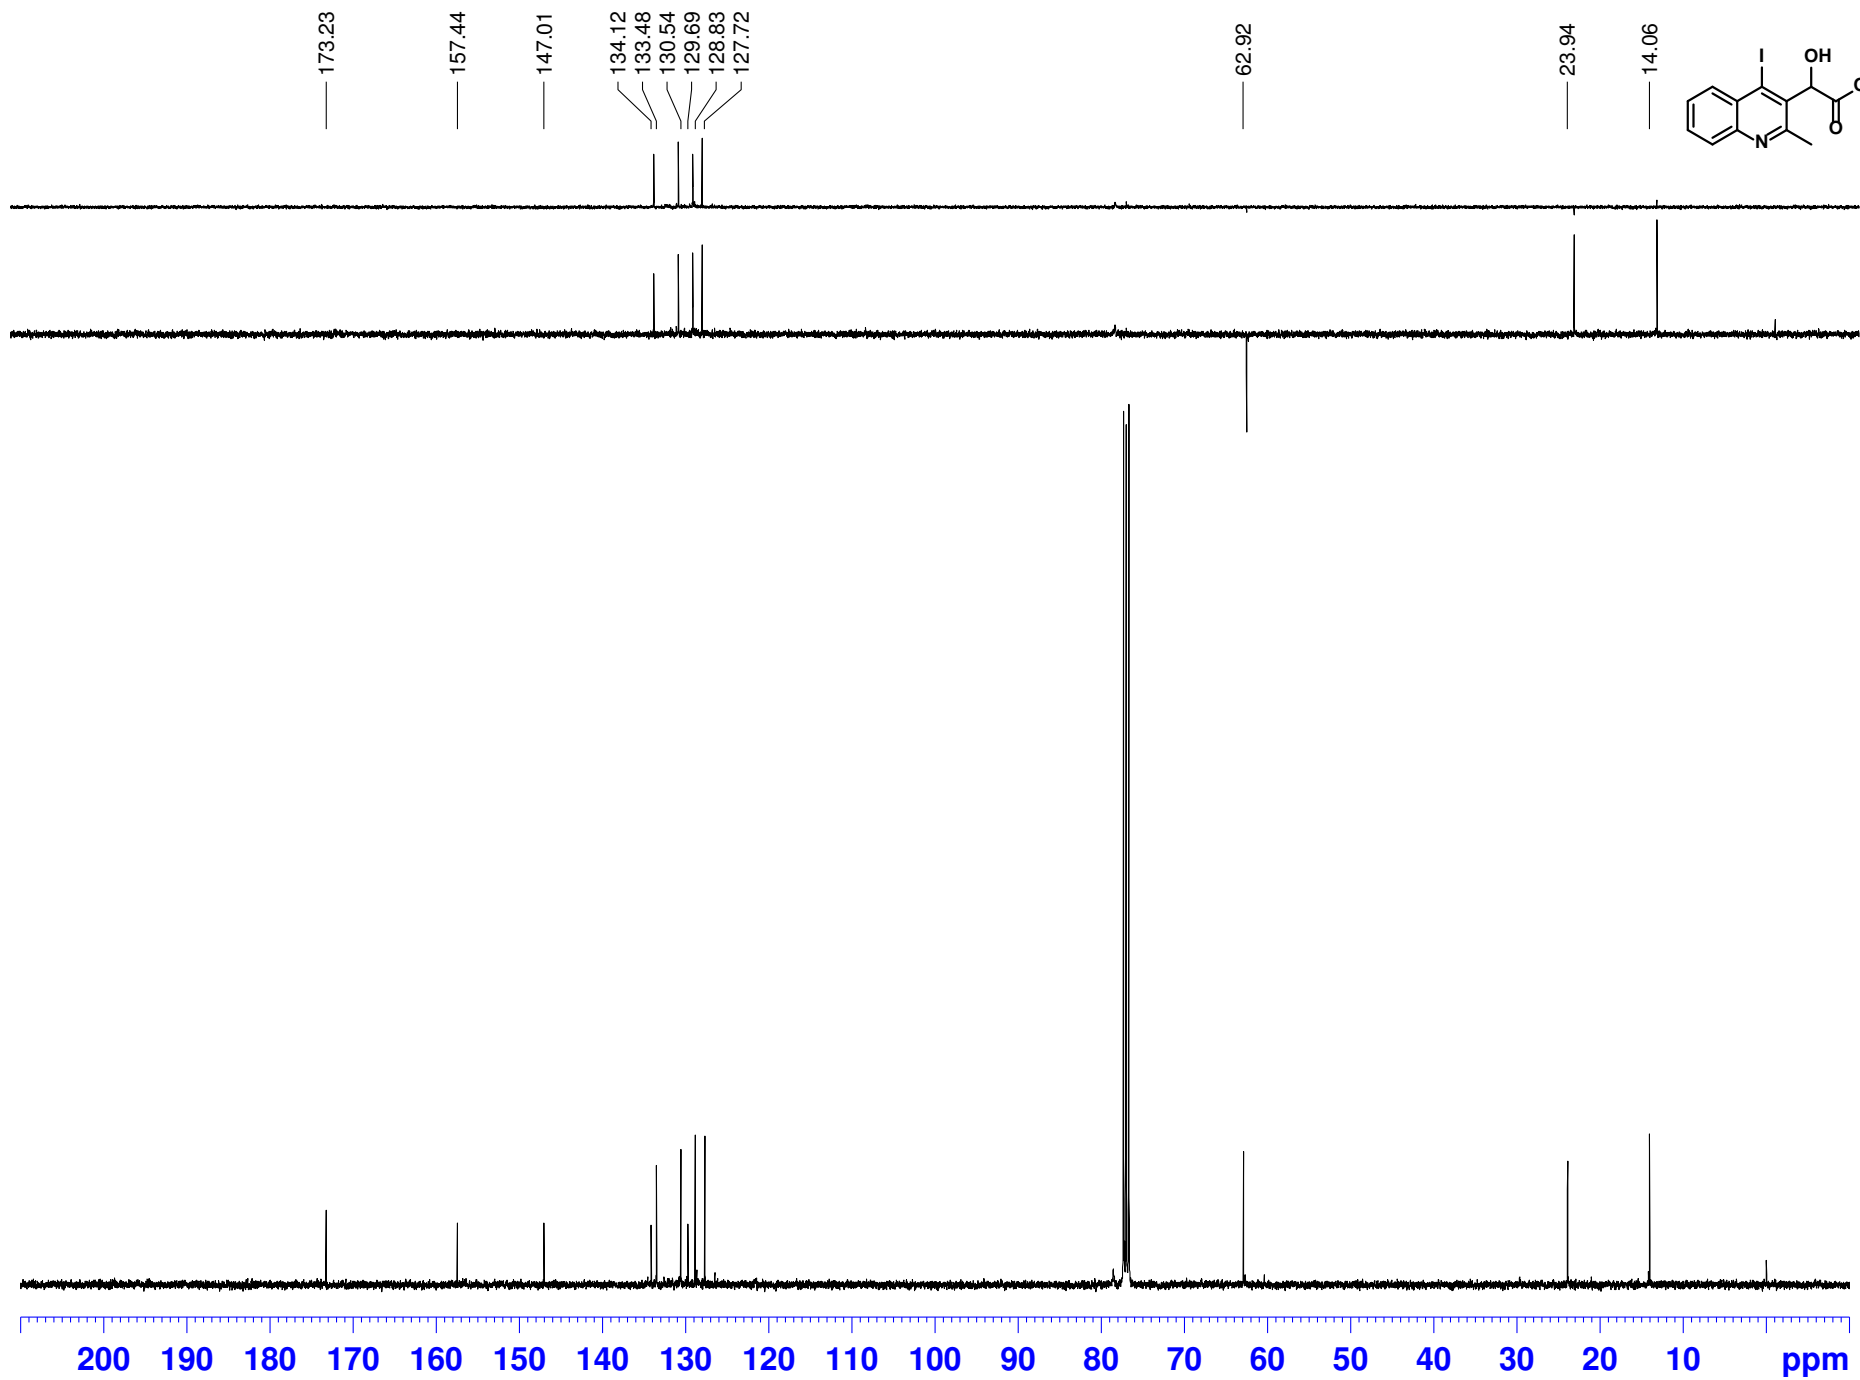

NGJ-7-070 (CDC13, 400 MHz) Pure Yellow Oil - t-butylation of iodo quinoline



NAME NGJ-7-070  
EXPNO 20  
PROCNO 1  
Date\_ 20170601  
Time\_ 22.47 h  
INSTRUM spect  
PROBHD Z108618\_0161 (  
PULPROG zg30  
TD 65536  
SOLVENT CDC13  
NS 16  
DS 2  
SWH 8012.820 Hz  
FIDRES 0.244532 Hz  
AQ 4.0894966 sec  
RG 101  
DW 62.400 usec  
DE 6.50 usec  
TE 297.4 K  
D1 1.00000000 sec  
TD0 1  
SFO1 400.1724710 MHz  
NUC1 1H  
P1 9.88 usec  
SI 65536  
SF 400.1700060 MHz  
WDW EM  
SSB 0  
LB 0.30 Hz  
GB 0  
PC 1.00

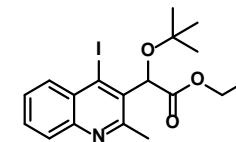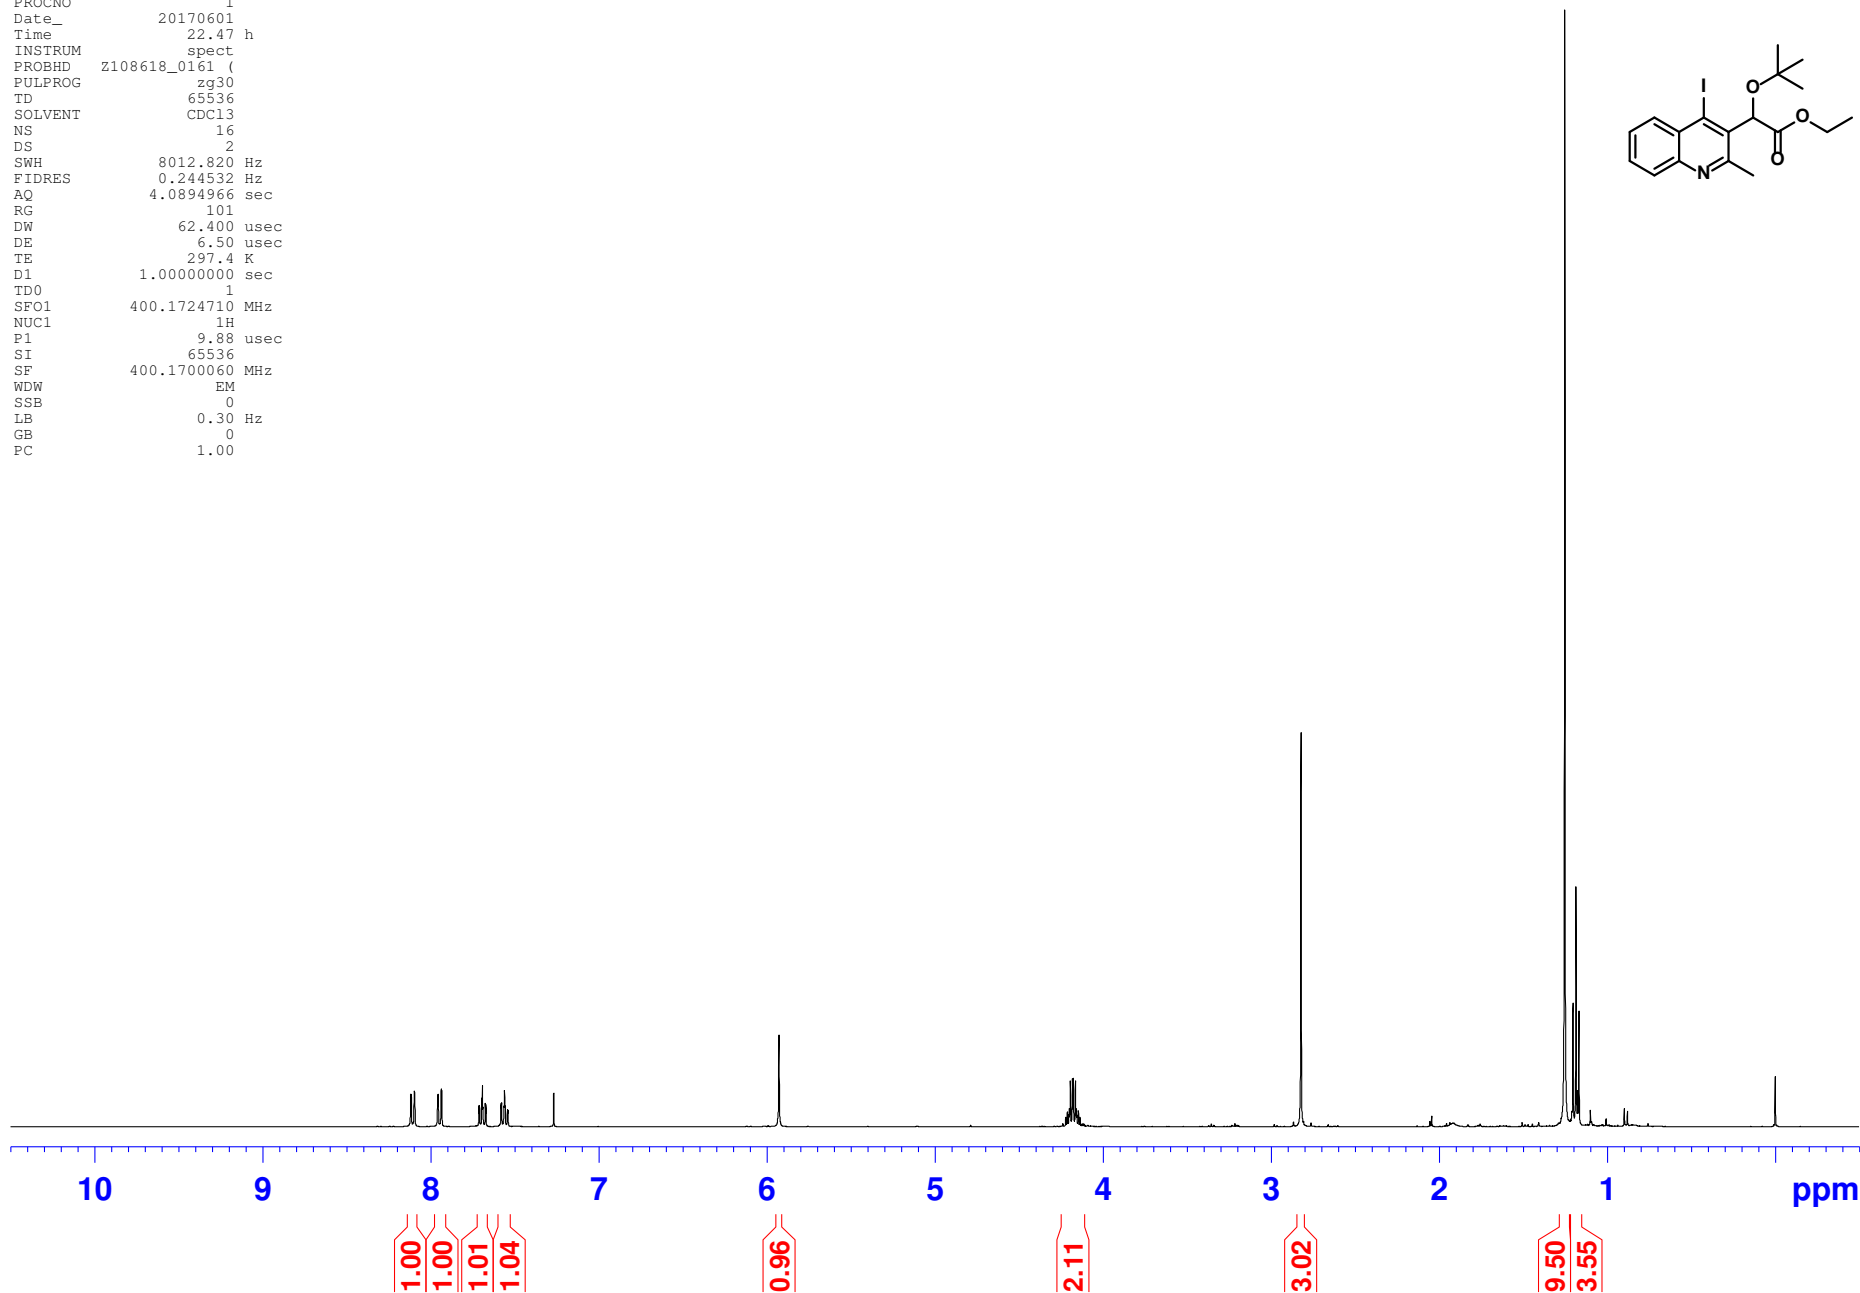

NGJ-7-070 (CDCl<sub>3</sub>, 400 MHz) Pure Yellow Oil - t-butylation of i

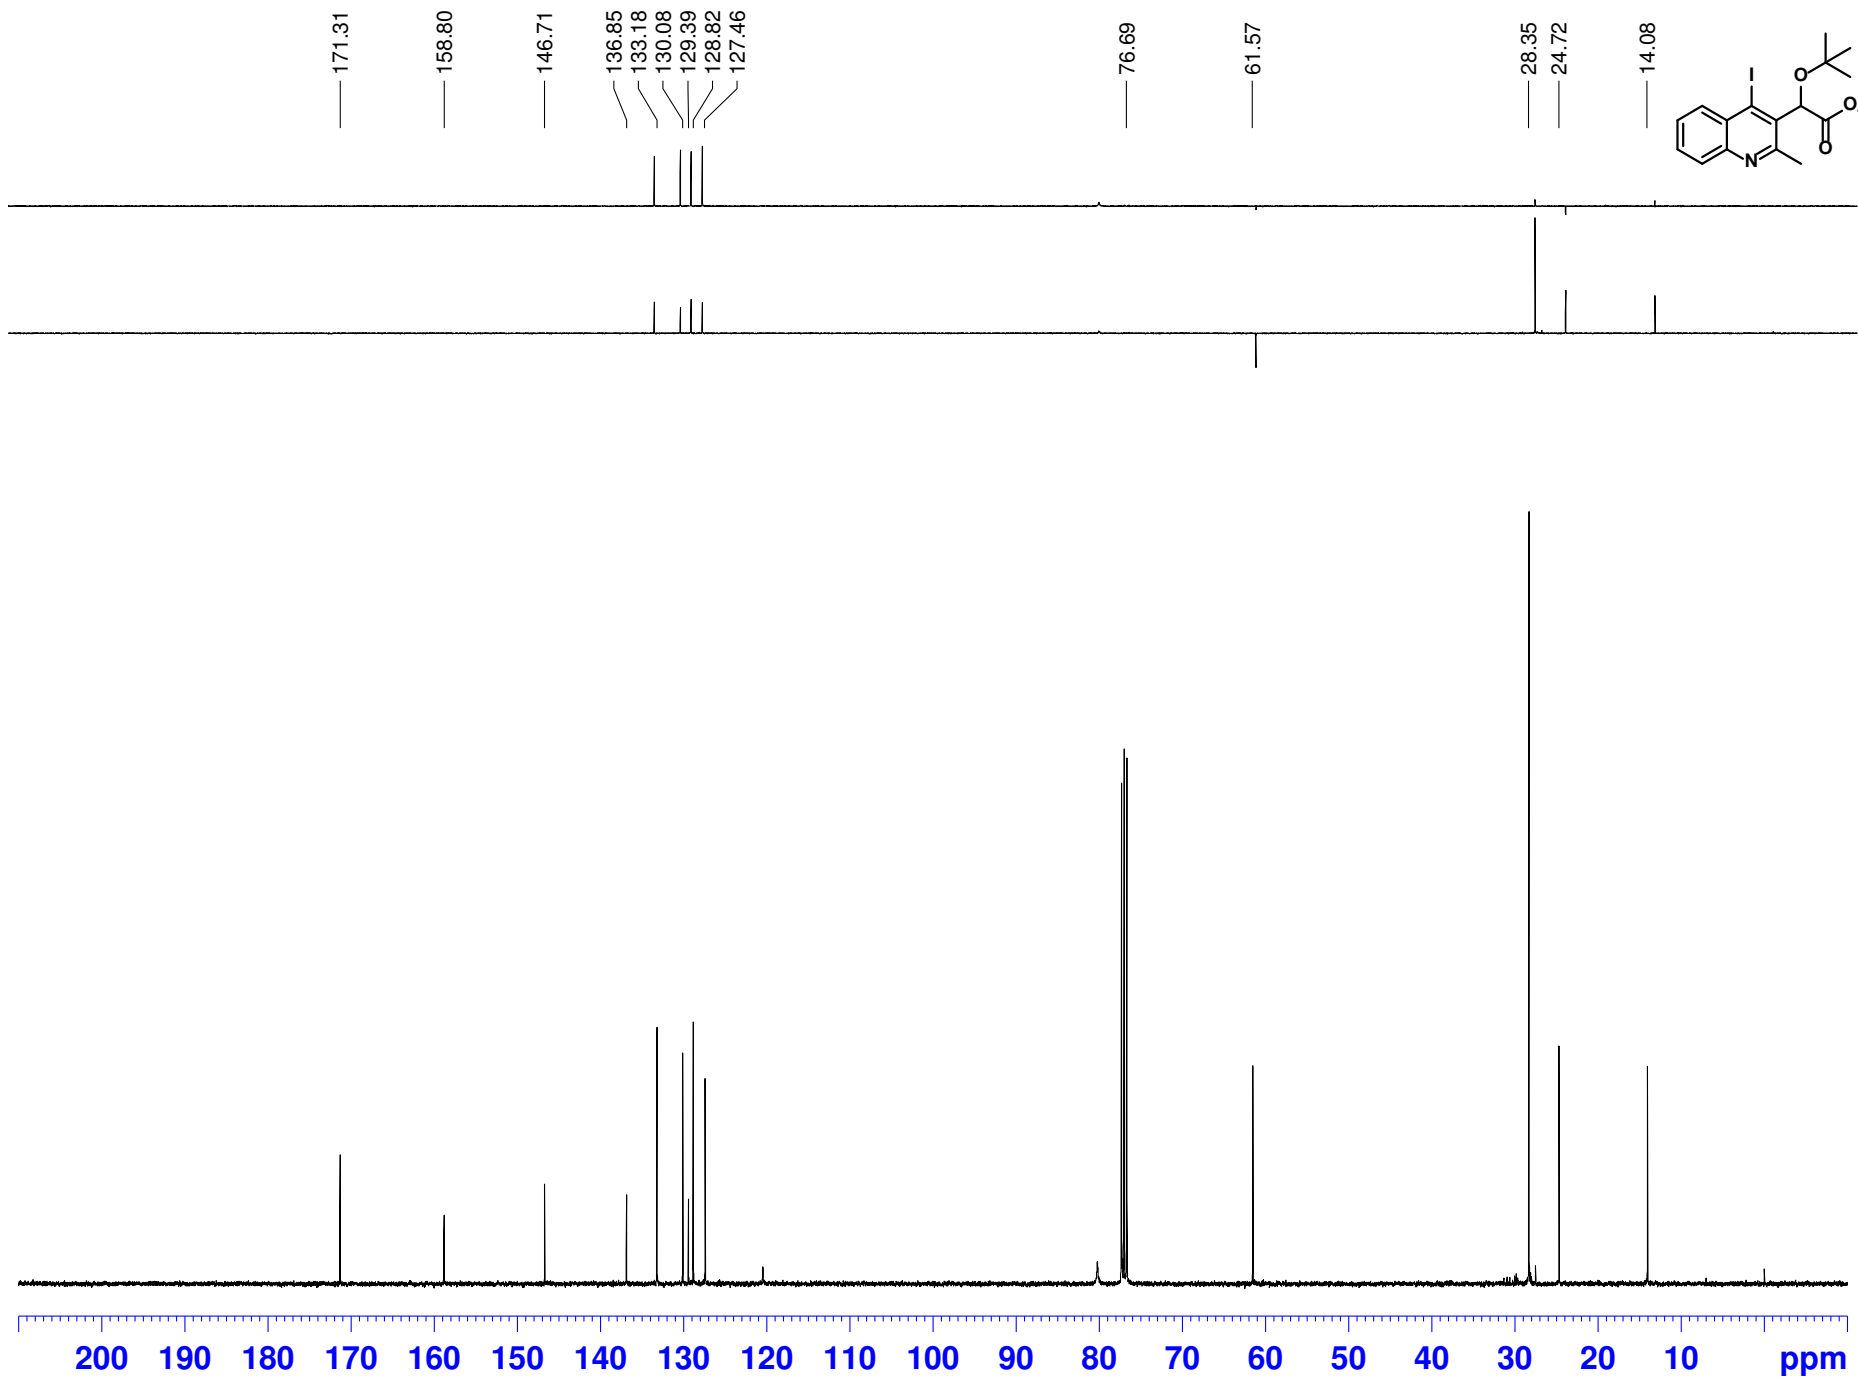

NGJ-9-018 (CDC13, 400 MHz) Pure Yellow Oil - suzuki coupling of iodoquinoline with phenylboronate

NAME NGJ-9-018  
 EXPNO 30  
 PROCNO 1  
 Date\_ 20171218  
 Time\_ 10.03 h  
 INSTRUM spect  
 PROBHD Z108618\_0161 ( )  
 PULPROG zg30  
 TD 65536  
 SOLVENT CDC13  
 NS 16  
 DS 2  
 SWH 8012.820 Hz  
 FIDRES 0.244532 Hz  
 AQ 4.0894966 sec  
 RG 57  
 DW 62.400 usec  
 DE 6.50 usec  
 TE 298.2 K  
 D1 1.00000000 sec  
 TD0 1  
 SFO1 400.1724710 MHz  
 NUC1 1H  
 P1 9.88 usec  
 SI 65536  
 SF 400.1700058 MHz  
 WDW EM  
 SSB 0  
 LB 0.30 Hz  
 GB 0  
 PC 1.00

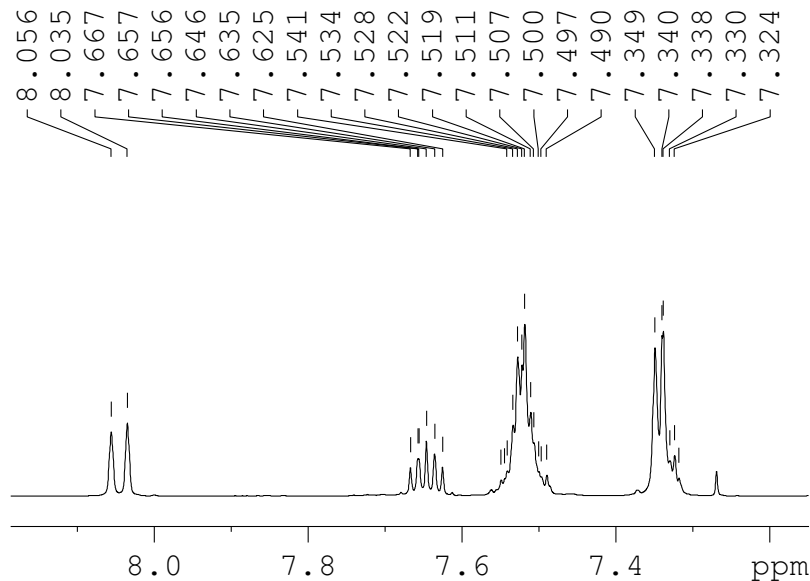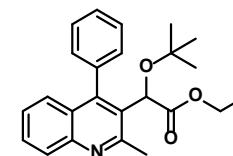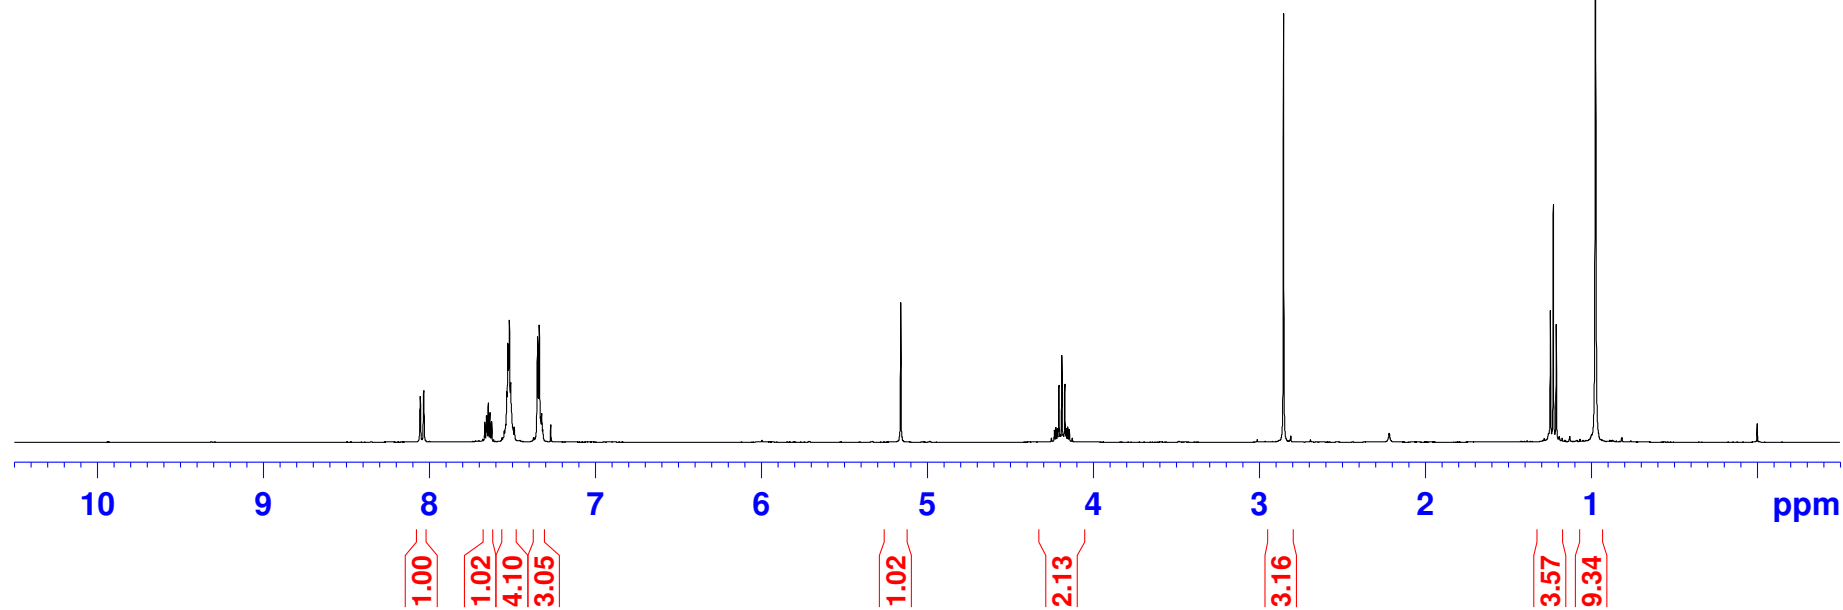

NGJ-9-018 (CDCl<sub>3</sub>, 400 MHz) Pure Yellow Oil - suzuki coupling of iodoquinoline with phenylboronic acid

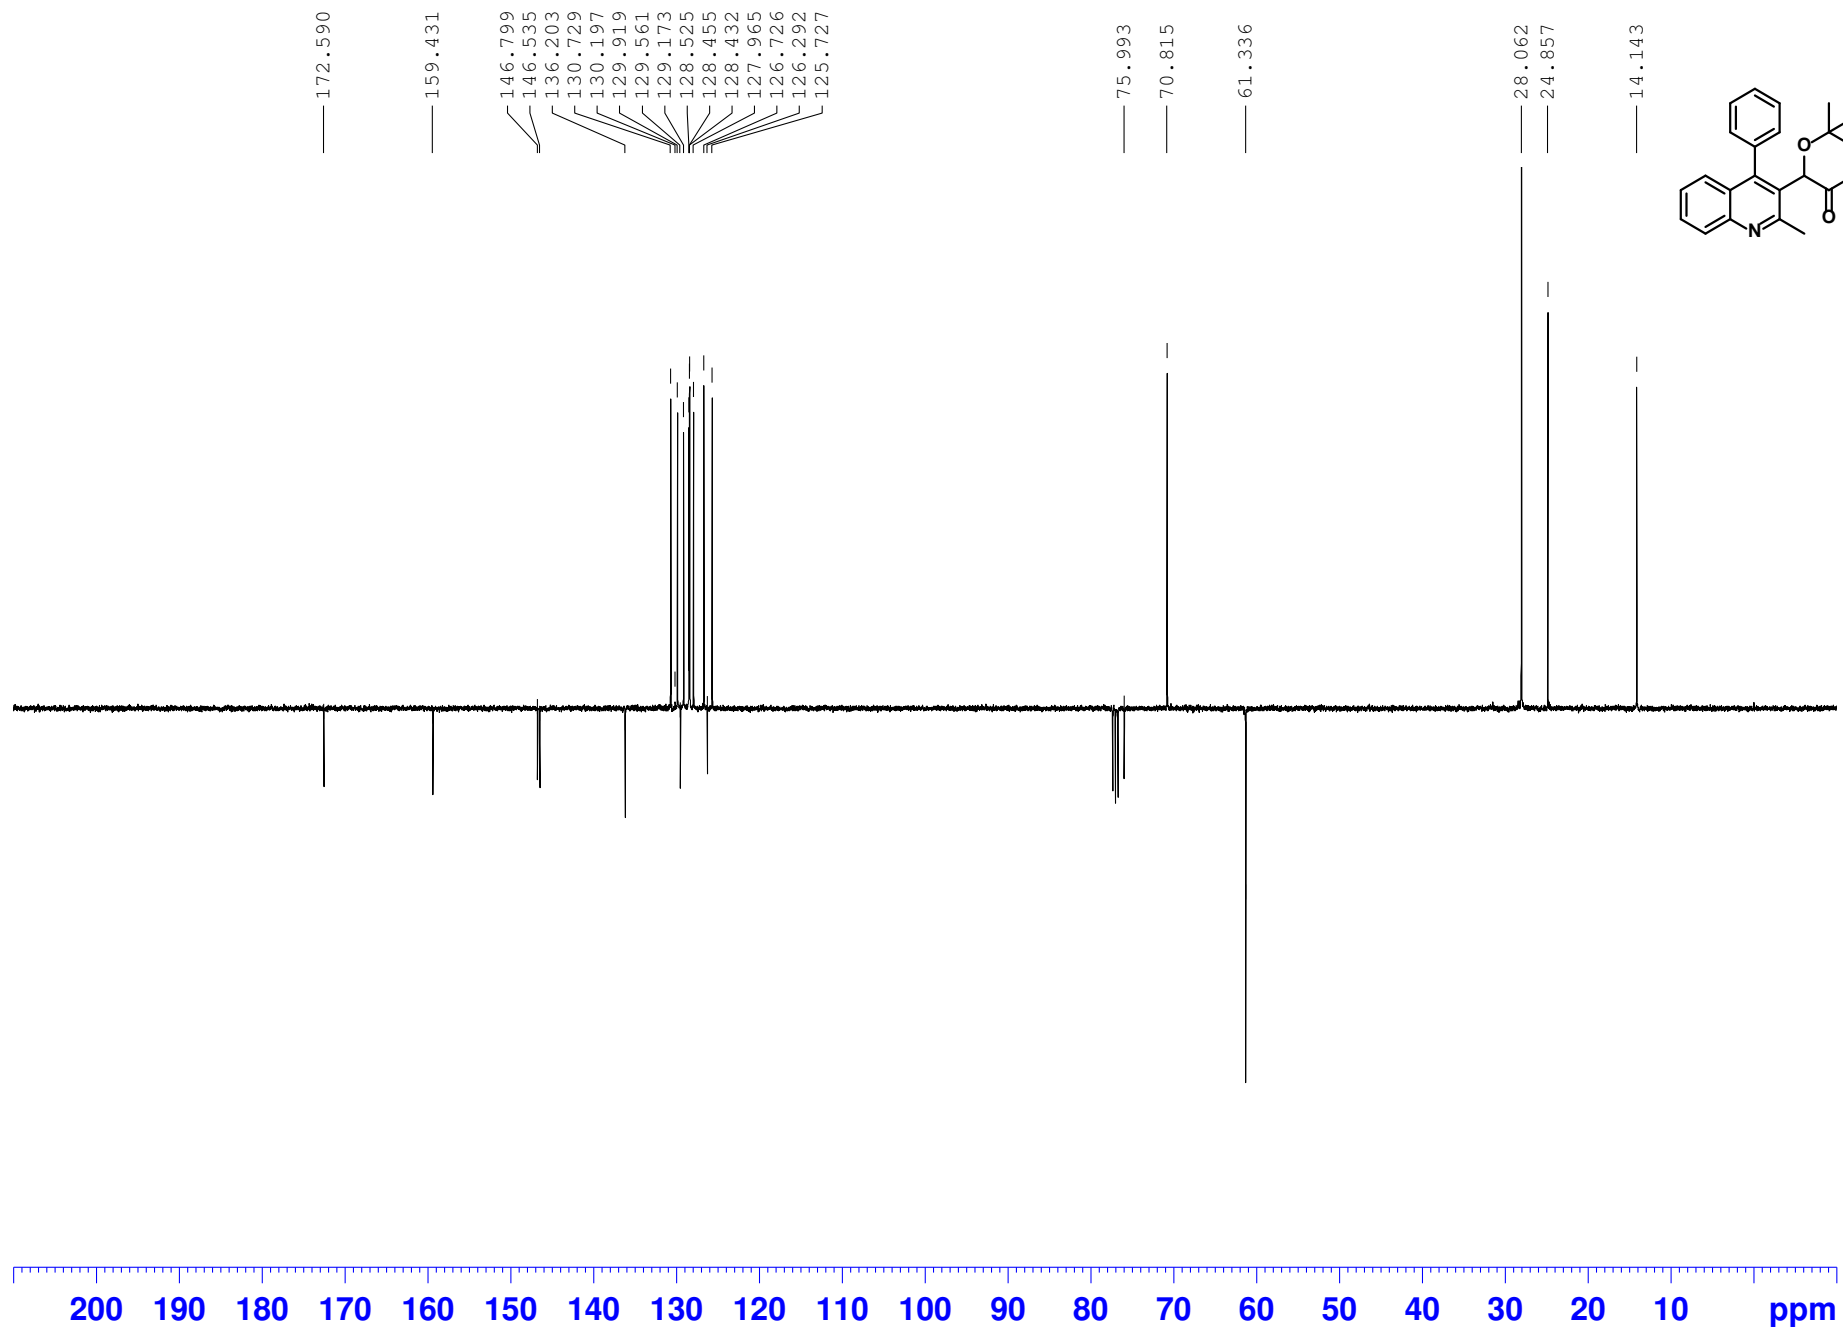

NGJ-7-059 (CDC13, 400 MHz) Pure Yellow Oil - t-butylation with HClO4



NAME NGJ-7-059  
EXPNO 20  
PROCNO 1  
Date\_ 20170517  
Time\_ 21.06 h  
INSTRUM spect  
PROBHD Z108618\_0161 (   
PULPROG zg30  
TD 65536  
SOLVENT CDC13  
NS 16  
DS 2  
SWH 8012.820 Hz  
FIDRES 0.244532 Hz  
AQ 4.0894966 sec  
RG 64  
DW 62.400 usec  
DE 6.50 usec  
TE 297.4 K  
D1 1.00000000 sec  
TD0 1  
SF01 400.1724710 MHz  
NUC1 1H  
P1 9.88 usec  
SI 65536  
SF 400.1700042 MHz  
WDW EM  
SSB 0  
LB 0.30 Hz  
GB 0  
PC 1.00

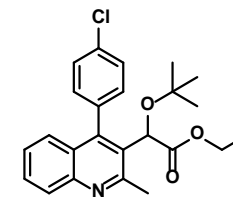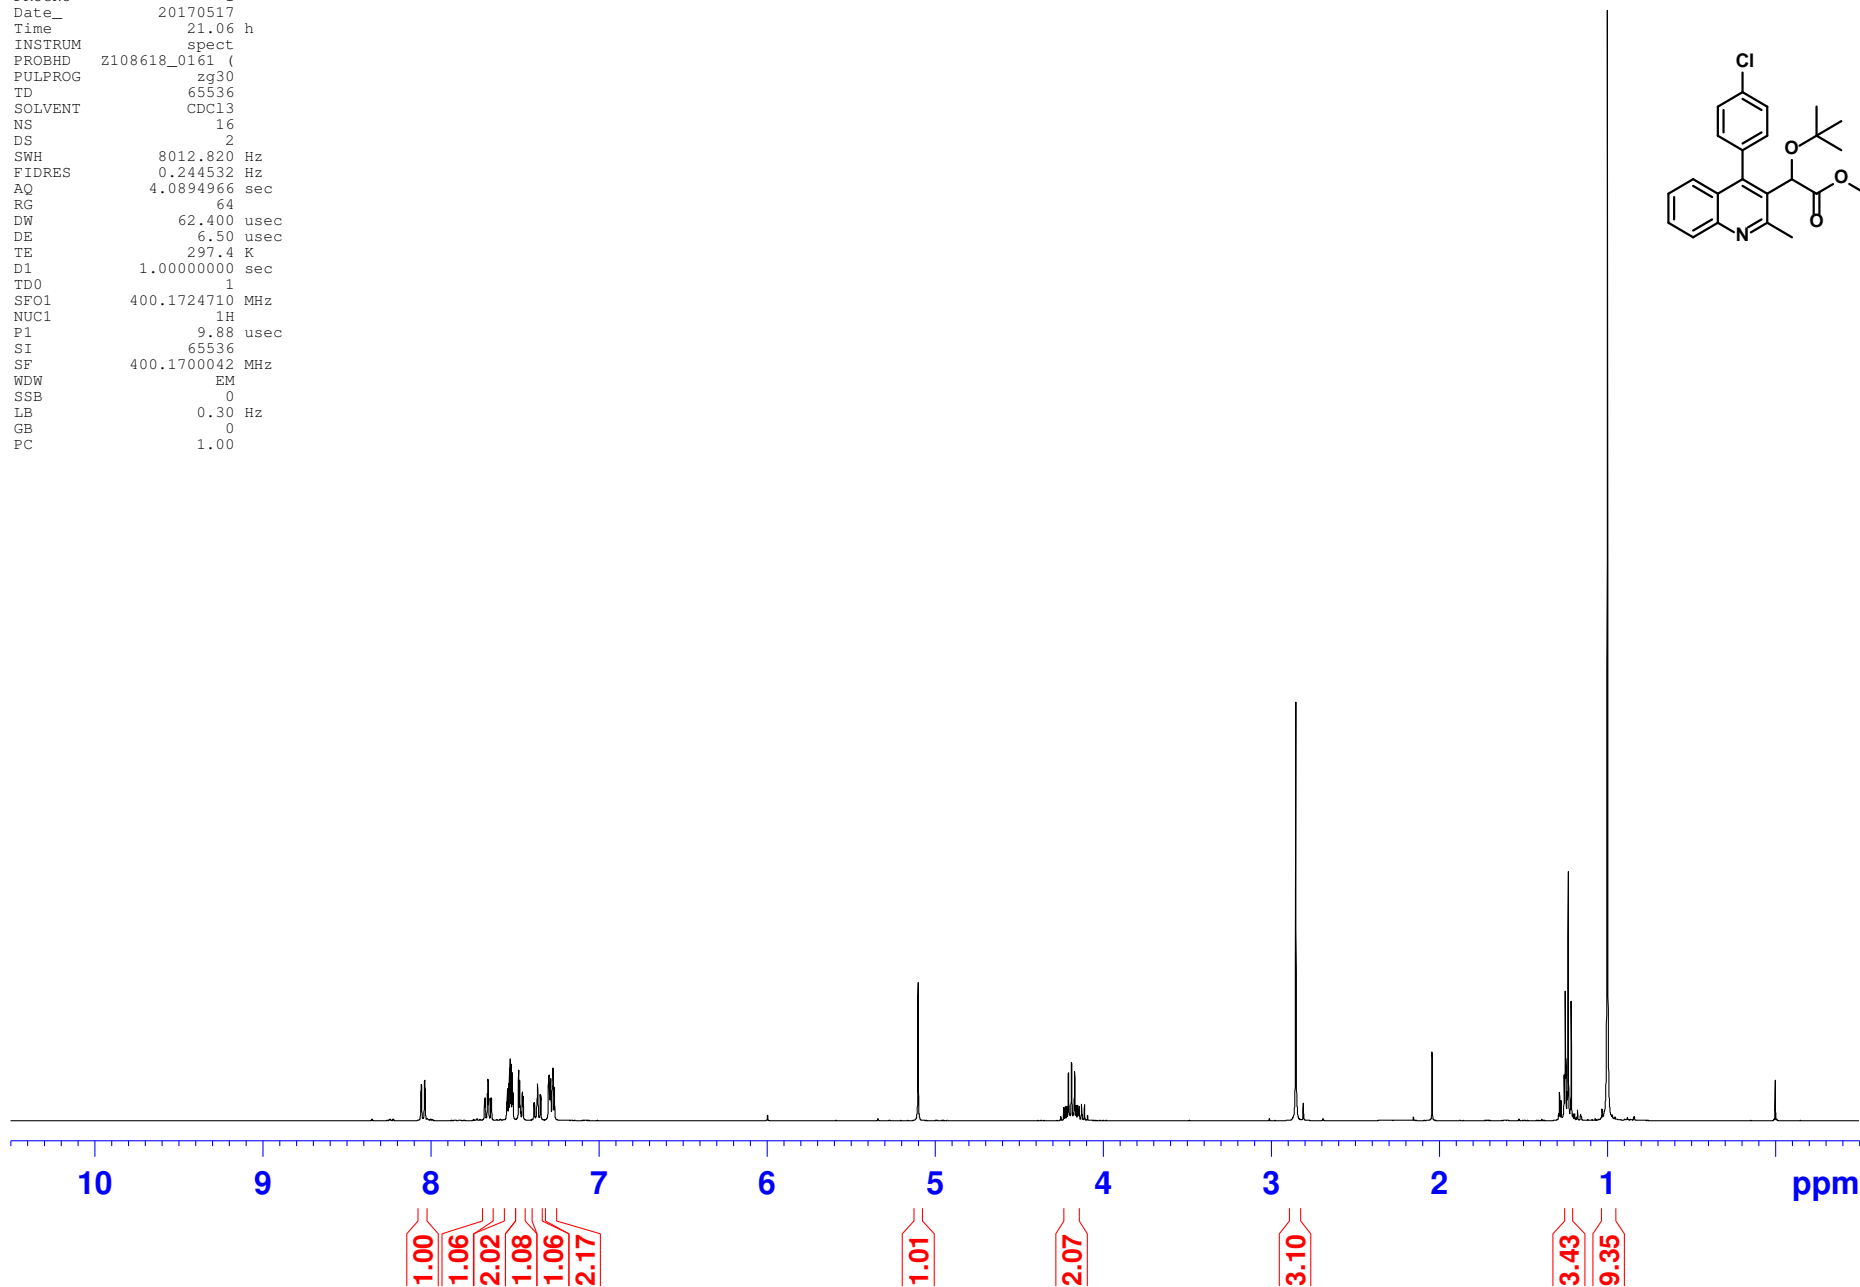

NGJ-7-059 (CDCl<sub>3</sub>, 400 MHz) Pure Yellow Oil - t-butylation with

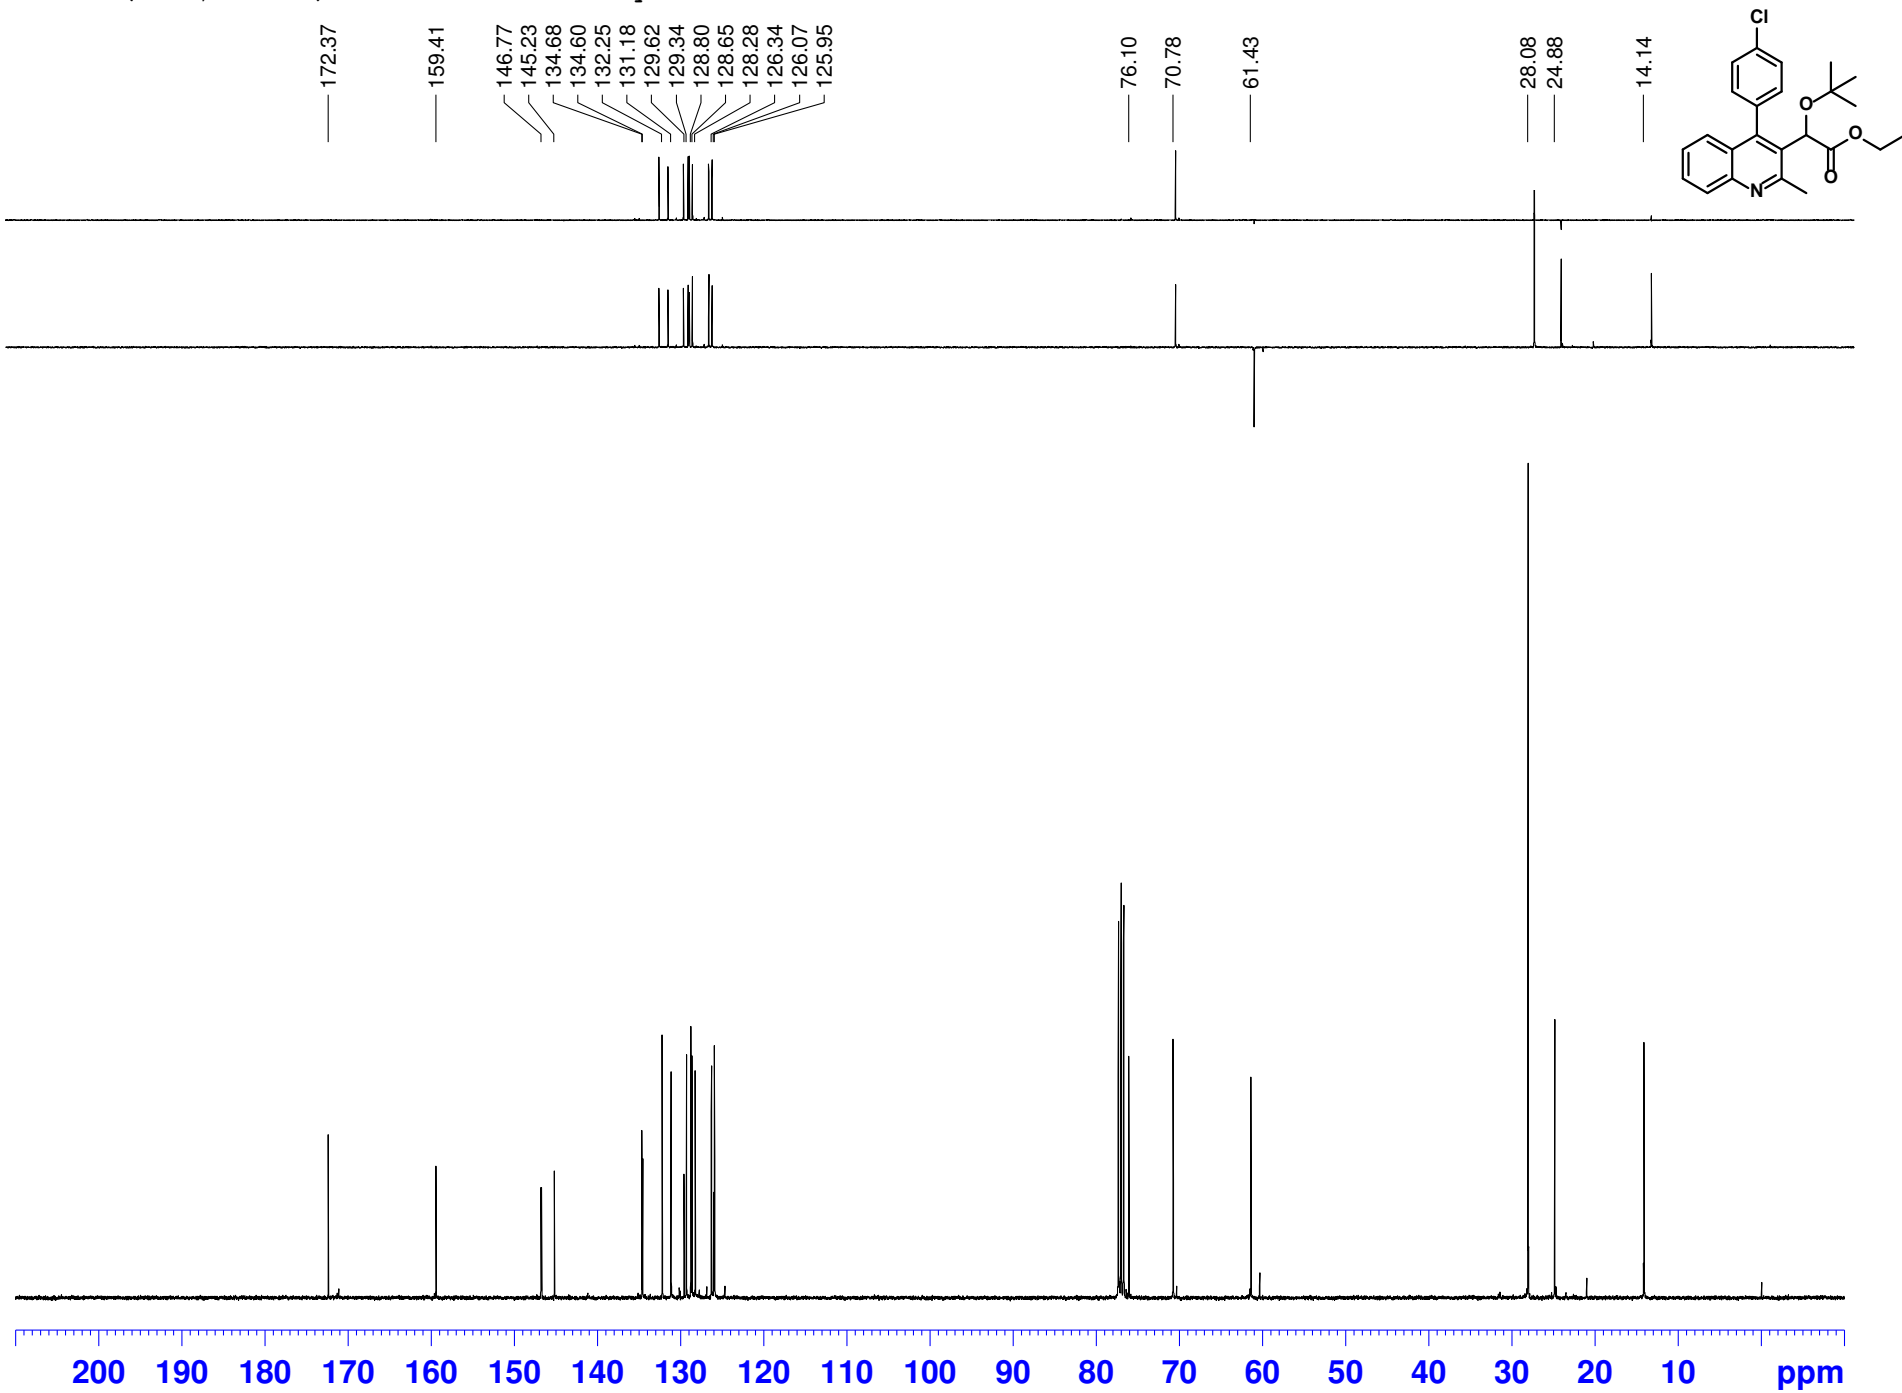



NGJ-8-098 (400MHz, CDCl3) Pure Brown Oil - suzuki coupling of iodoquinoline with 4-fluorophenyl

NAME NGJ-8-098  
EXPNO 30  
PROCNO 1  
Date\_ 20171114  
Time\_ 22.20 h  
INSTRUM spect  
PROBHD Z108618\_0161 (  
PULPROG zg30  
TD 65536  
SOLVENT CDCl3  
NS 16  
DS 2  
SWH 8012.820 Hz  
FIDRES 0.244532 Hz  
AQ 4.0894966 sec  
RG 161  
DW 62.400 usec  
DE 6.50 usec  
TE 298.2 K  
D1 1.00000000 sec  
TD0 1  
SFO1 400.1724710 MHz  
NUC1 1H  
P1 9.88 usec  
SI 65536  
SF 400.1700081 MHz  
WDW EM  
SSB 0  
LB 0.30 Hz  
GB 0  
PC 1.00

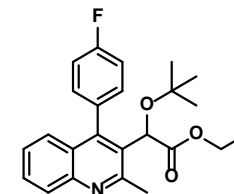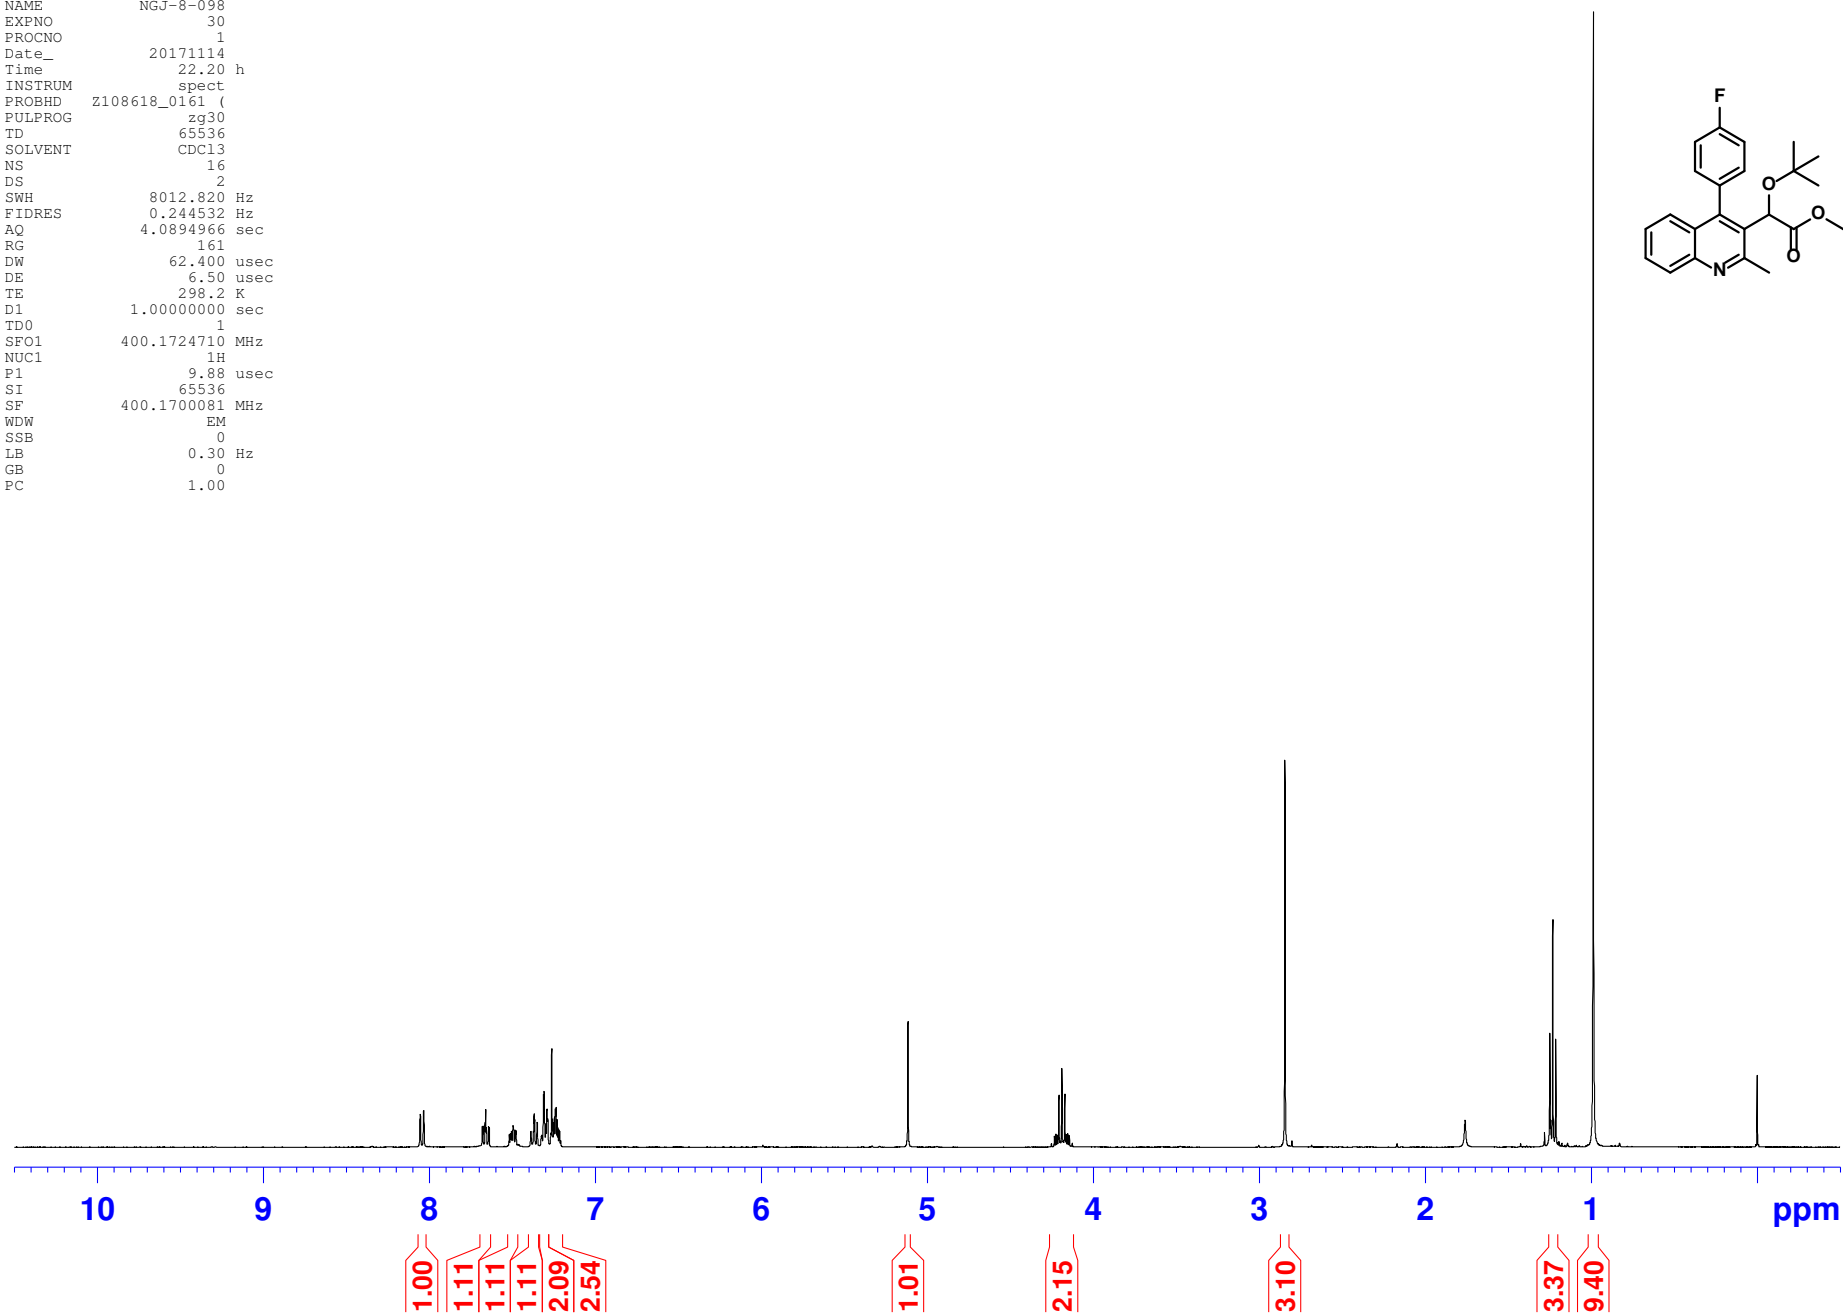

NGJ-8-098 (400MHz, CDC13) Pure Brown Oil - suzuki coupling of

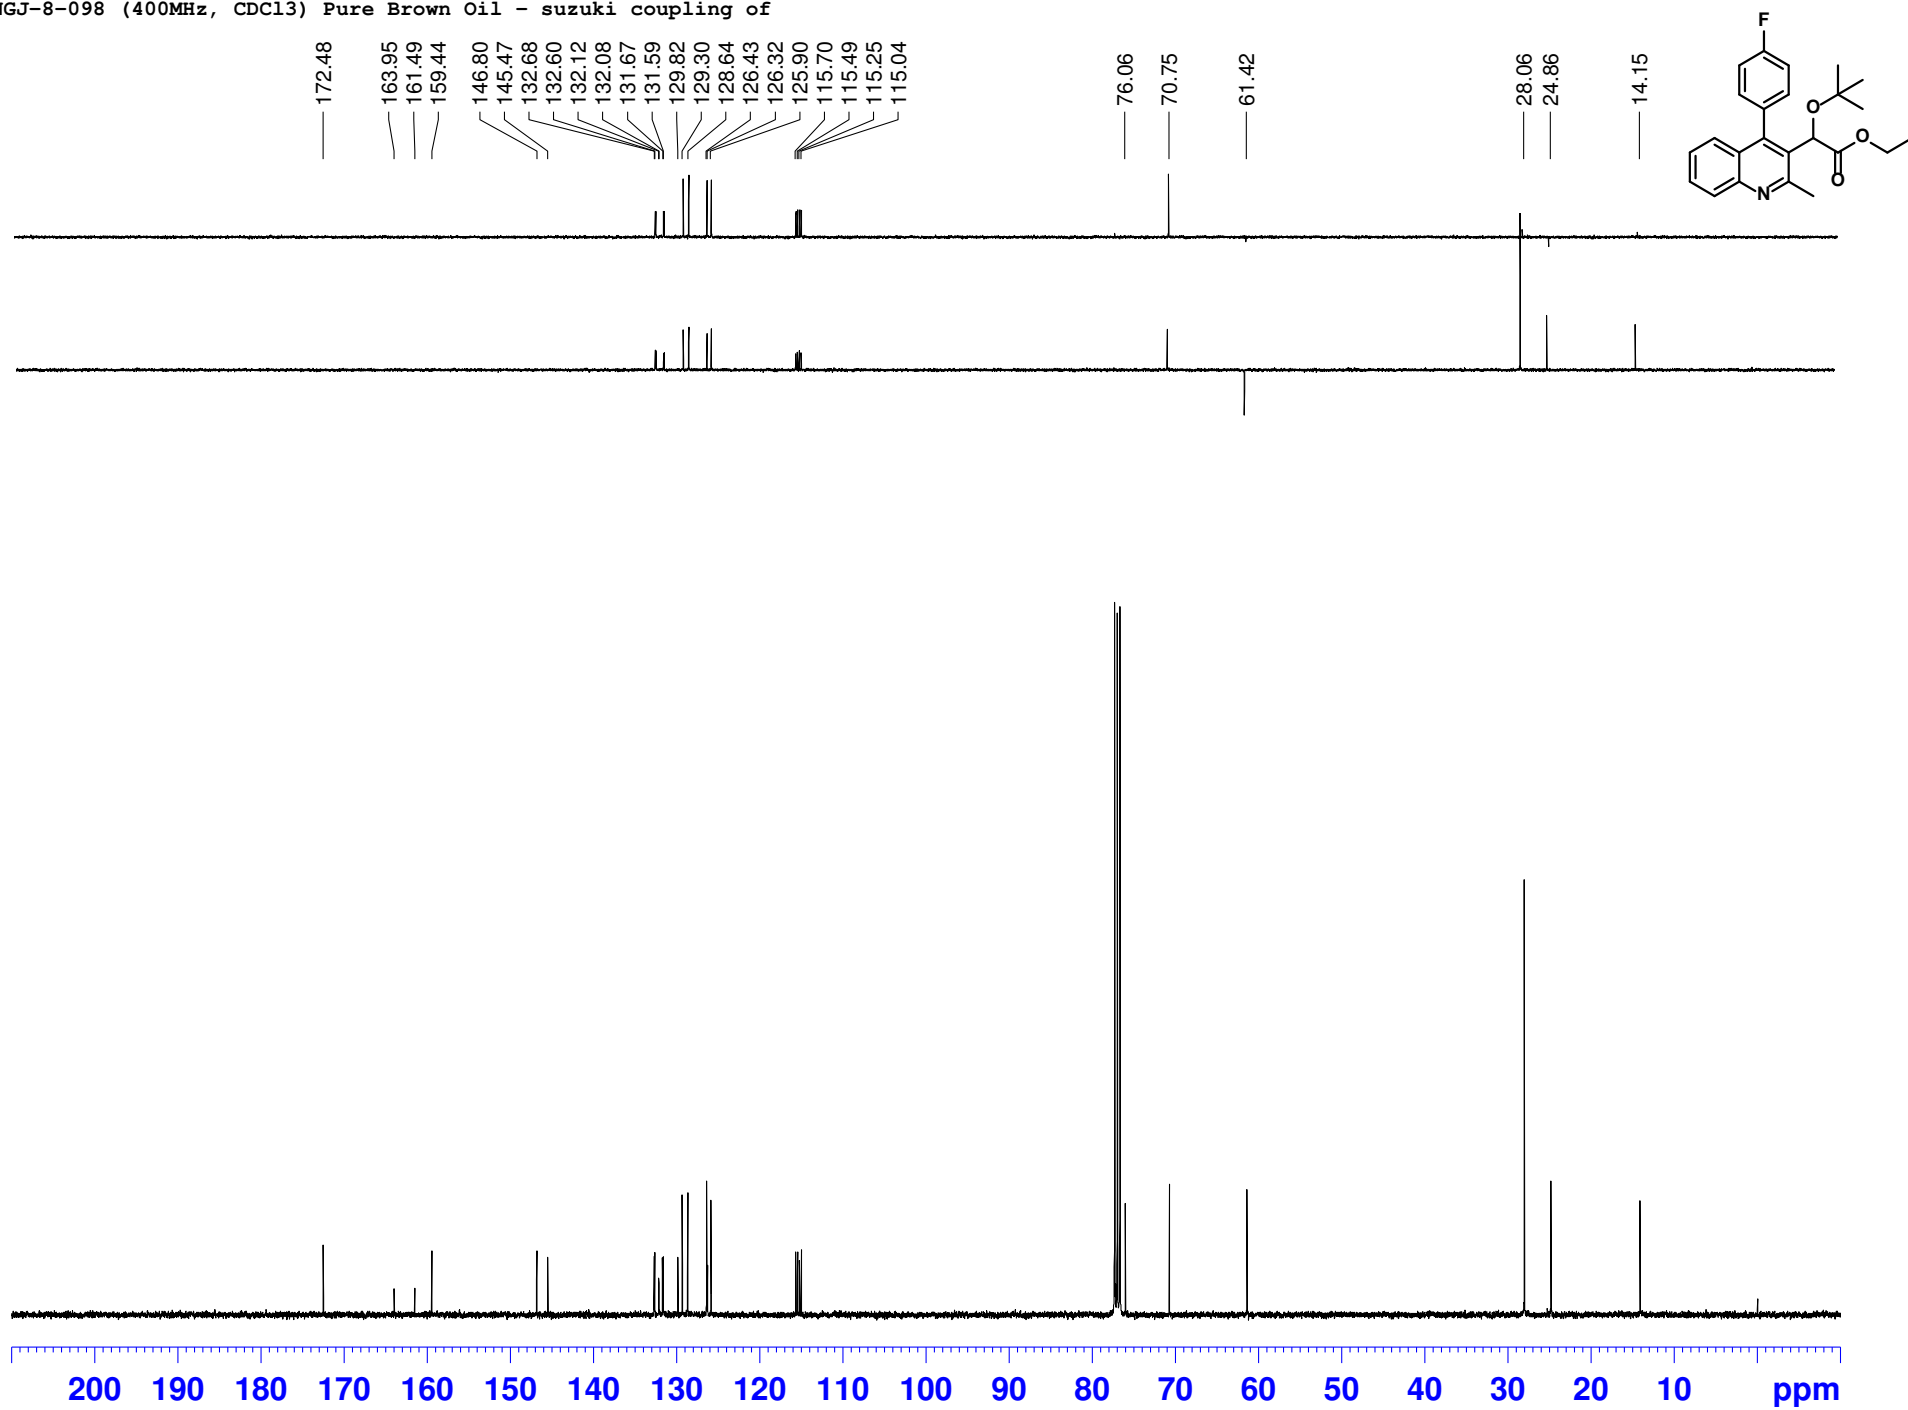

NGJ-9-019 (CDC13, 400MHz)

```

NAME      NGJ-9-019
EXPNO     30
PROCNO    1
Date_     20171219
Time      23.05 h
INSTRUM   spect
PROBHD    Z108618_0161 (
PULPROG   zg30
TD         65536
SOLVENT   CDC13
NS         16
DS         2
SWH        8012.820 Hz
FIDRES     0.244532 Hz
AQ         4.0894966 sec
RG          71.8
DW         62.400 usec
DE         6.50 usec
TE         298.3 K
D1         1.00000000 sec
TD0        1
SFO1      400.1724710 MHz
NUC1       1H
P1         9.88 usec
SI         65536
SF         400.1700073 MHz
WDW        EM
SSB        0
LB         0.30 Hz
GB         0
PC         1.00
    
```

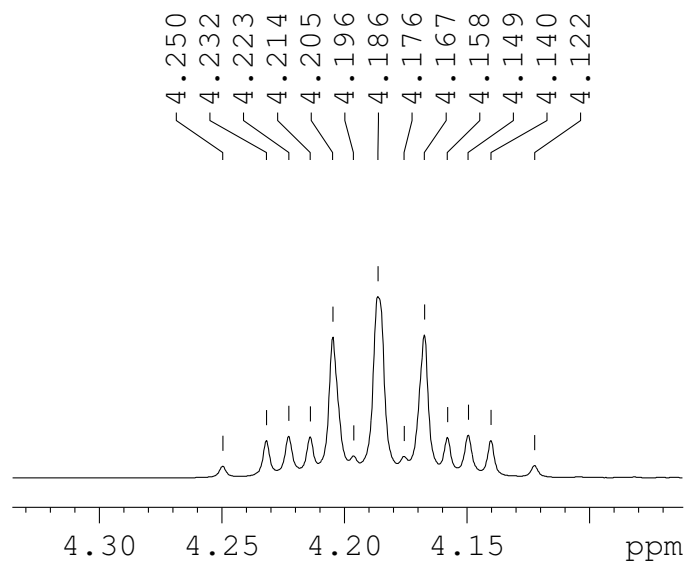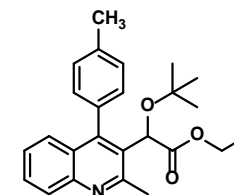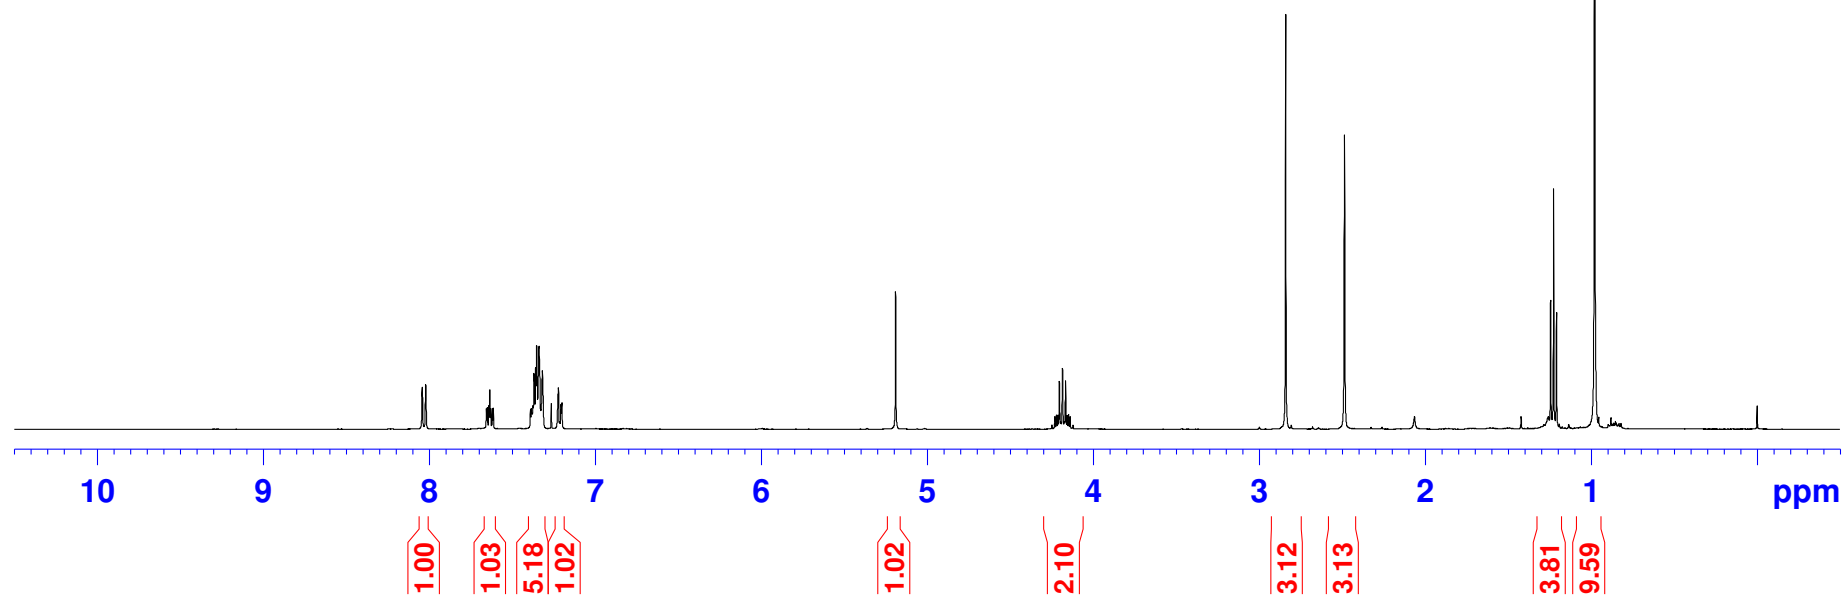

NGJ-9-019 (CDC13, 400MHz)

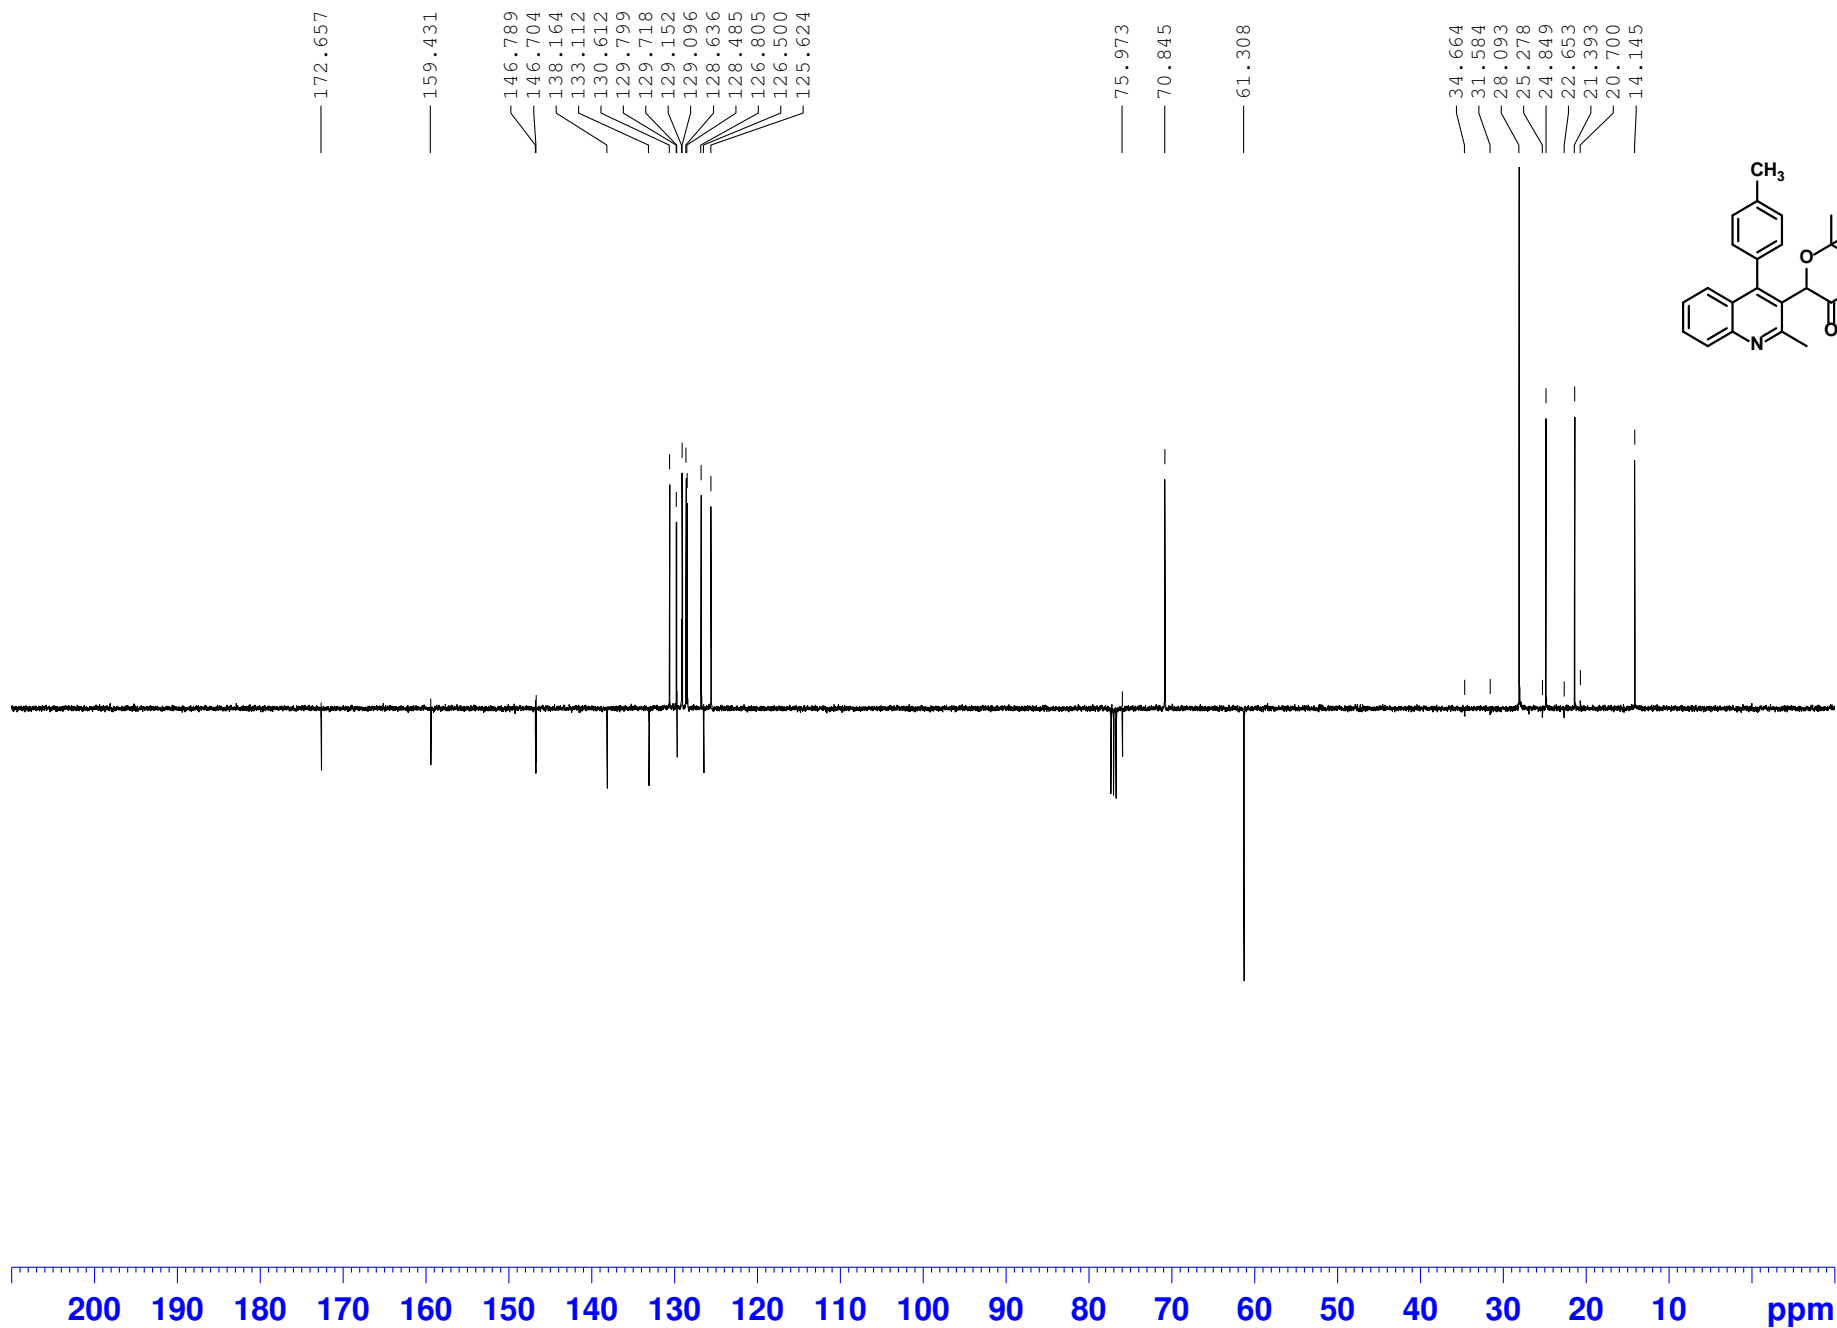

NGJ-9-020 (CDC13, 400 MHz) Pure Yellow Oil - suzuki coupling of iodoquinoline with 4-trifluor

NAME NGJ-9-020  
 EXPNO 20  
 PROCNO 1  
 Date\_ 20171220  
 Time\_ 17.02 h  
 INSTRUM spect  
 PROBHD Z108618\_0161 (  
 PULPROG zg30  
 TD 65536  
 SOLVENT CDC13  
 NS 16  
 DS 2  
 SWH 8012.820 Hz  
 FIDRES 0.244532 Hz  
 AQ 4.0894966 sec  
 RG 64  
 DW 62.400 usec  
 DE 6.50 usec  
 TE 298.3 K  
 D1 1.00000000 sec  
 TD0 1  
 SF01 400.1724710 MHz  
 NUC1 1H  
 P1 9.88 usec  
 SI 65536  
 SF 400.1700058 MHz  
 WDW EM  
 SSB 0  
 LB 0.30 Hz  
 GB 0  
 PC 1.00

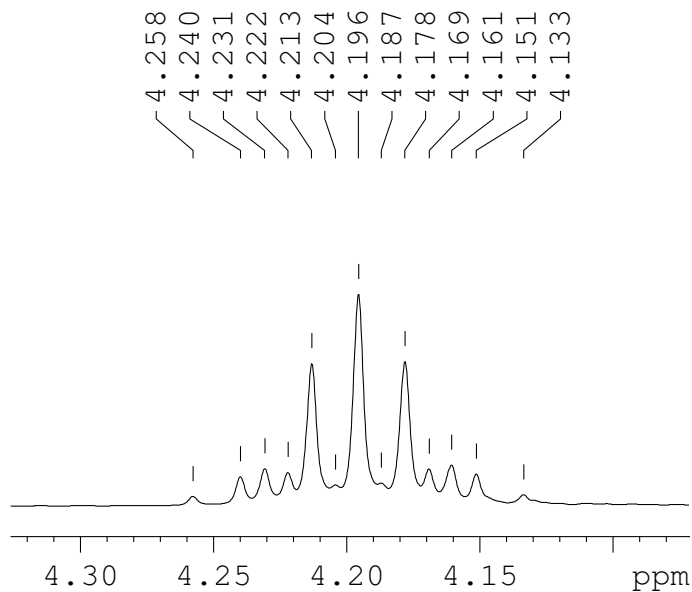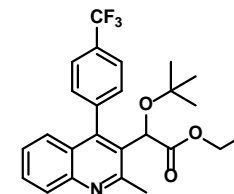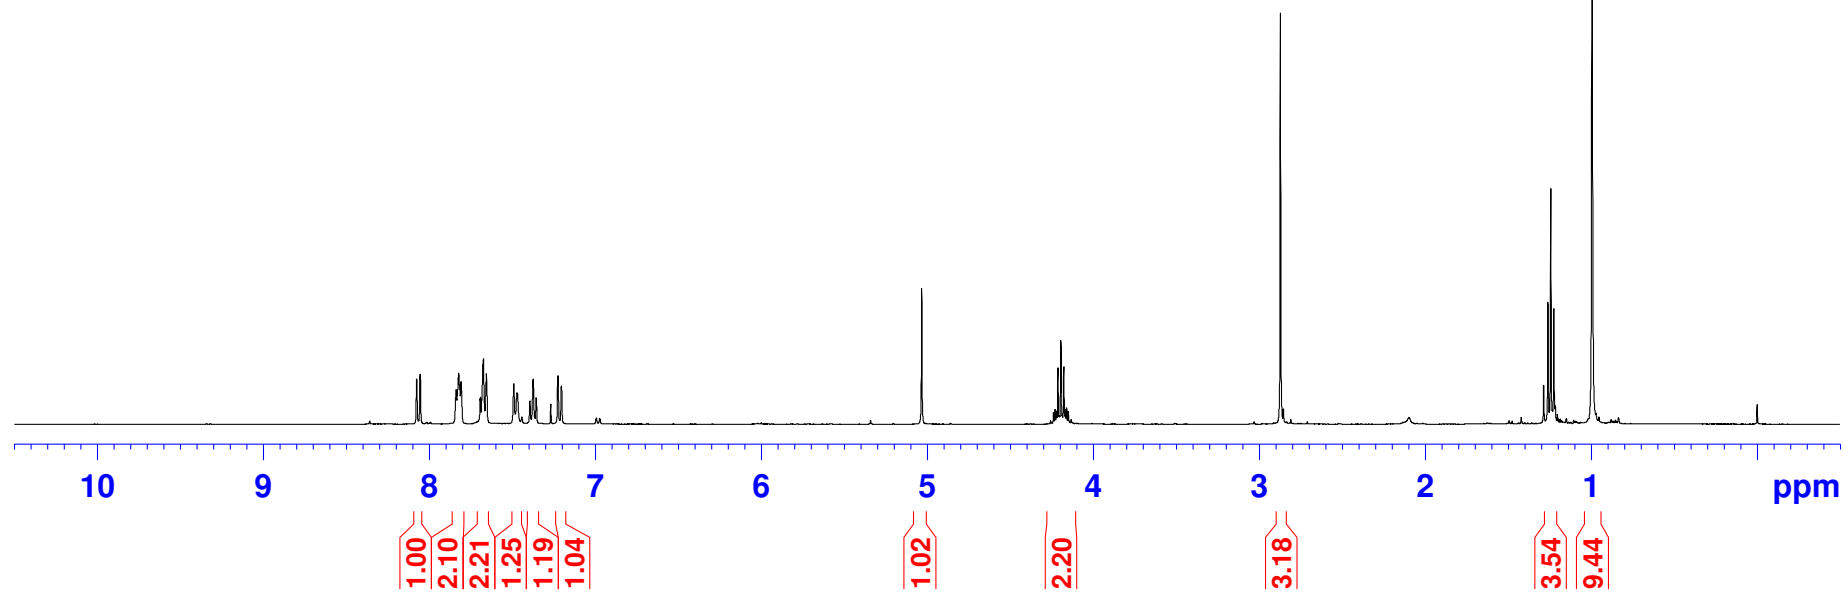



JDH-1-141 (CDC13, 400MHz) pure yellow oil - Suzuki Coupling of Iodoquinoline with 4 methoxyphenylboronic acid

NAME JDH-1-141  
 EXPNO 50  
 PROCNO 1  
 Date\_ 20170622  
 Time\_ 19.58 h  
 INSTRUM spect  
 PROBHD Z108618\_0161 (   
 PULPROG zg30  
 TD 65536  
 SOLVENT CDC13  
 NS 16  
 DS 2  
 SWH 8012.820 Hz  
 FIDRES 0.244532 Hz  
 AQ 4.0894966 sec  
 RG 181  
 DW 62.400 usec  
 DE 6.50 usec  
 TE 297.4 K  
 D1 1.00000000 sec  
 TD0 1  
 SFO1 400.1724710 MHz  
 NUC1 1H  
 P1 9.88 usec  
 SI 65536  
 SF 400.1700084 MHz  
 WDW EM  
 SSB 0  
 LB 0.30 Hz  
 GB 0  
 PC 1.00

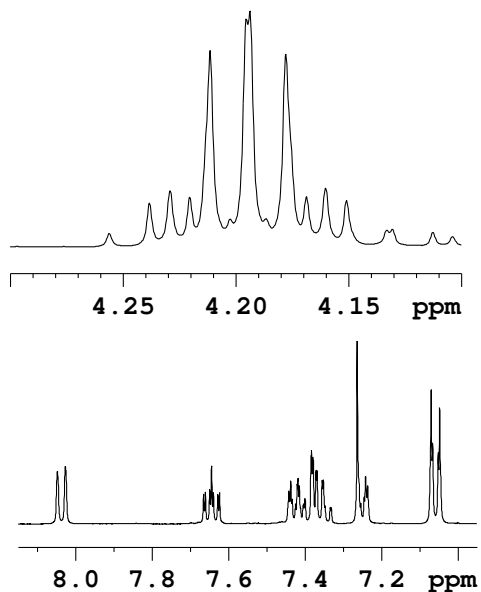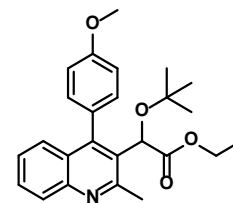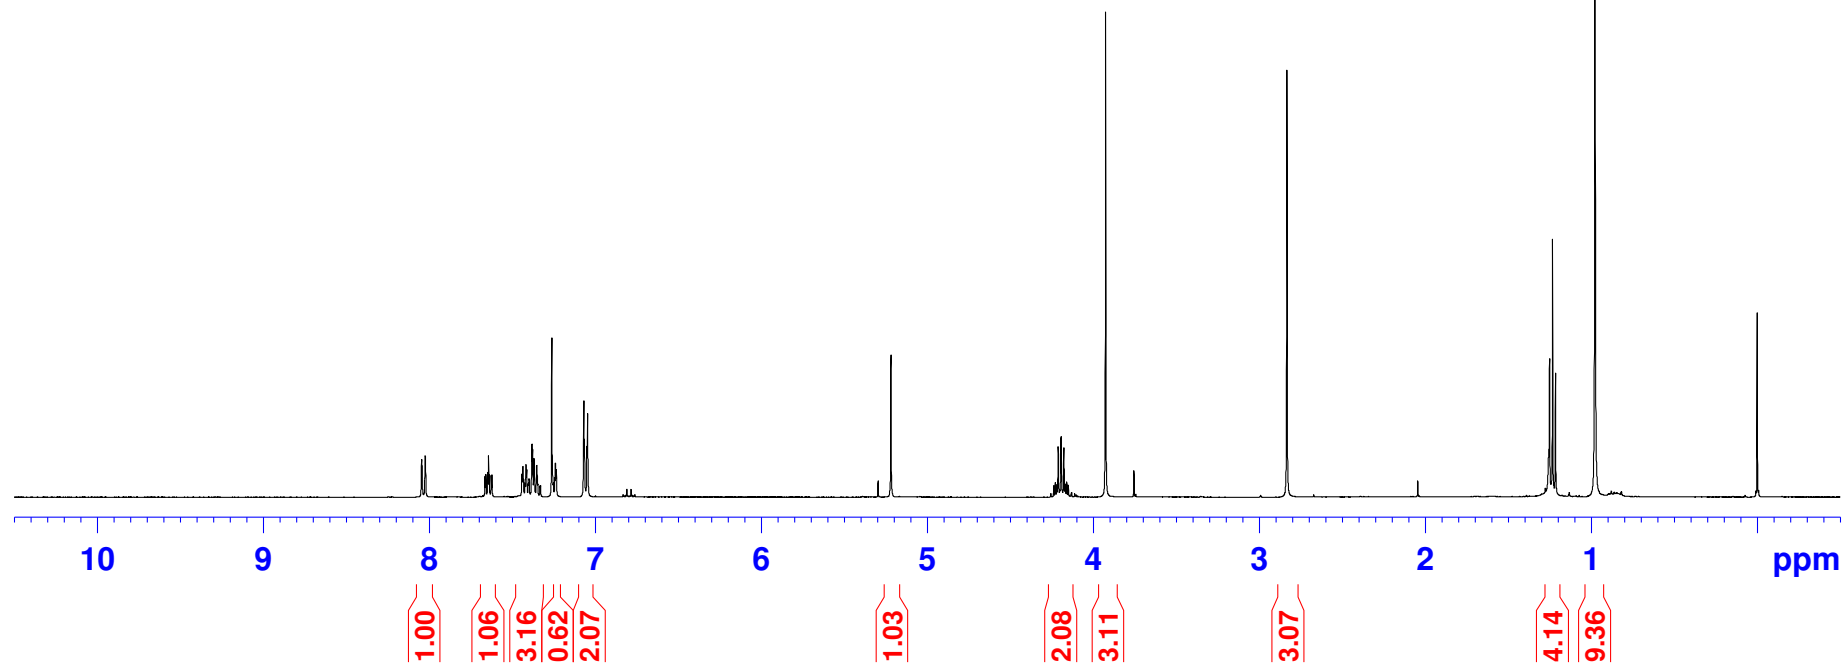

JDH-1-141 (CDCl<sub>3</sub>, 400MHz) pure yellow oil - Suzuki Coupling of

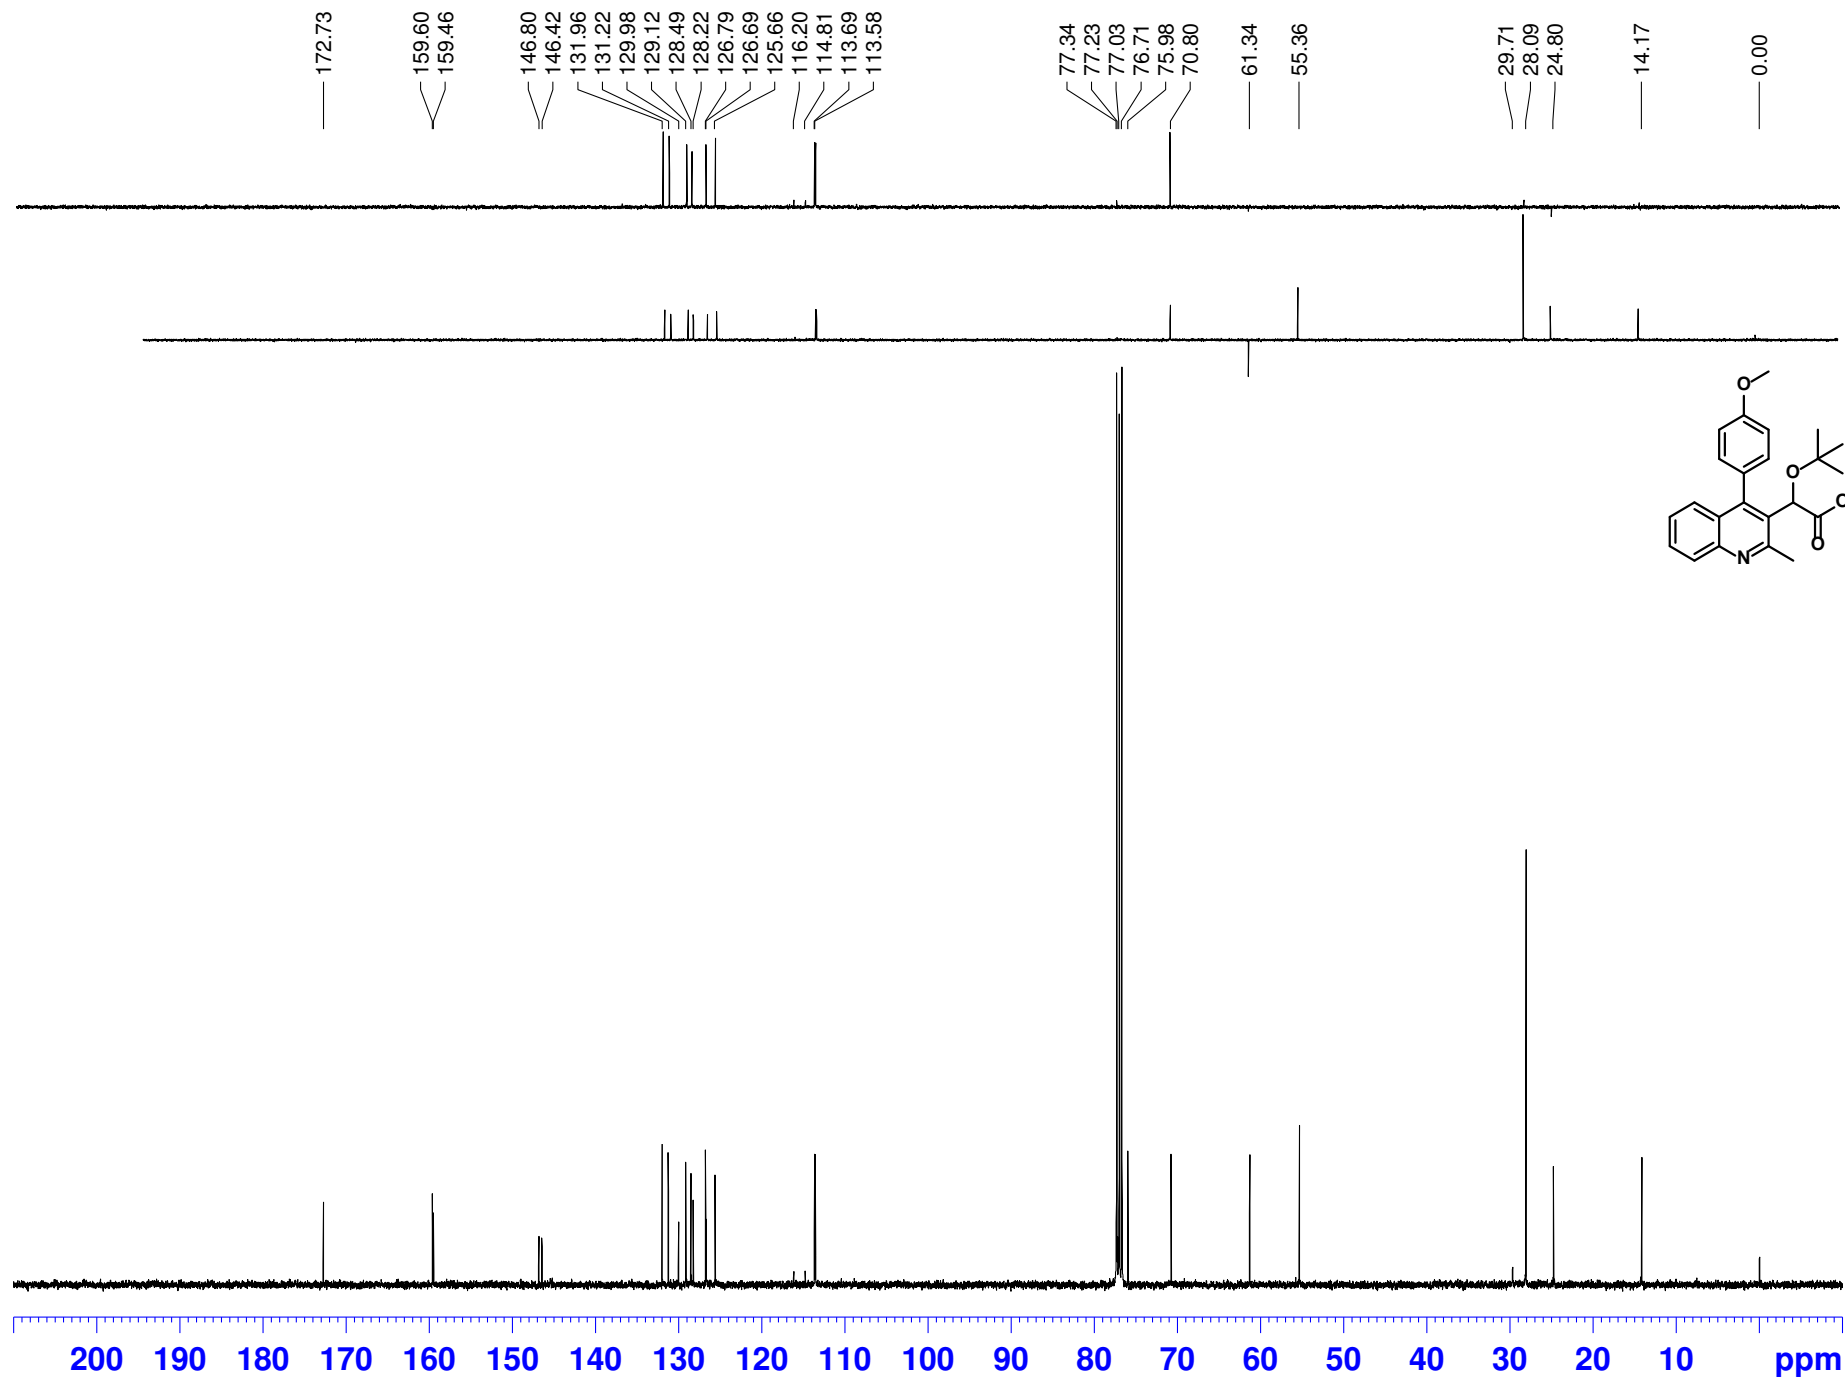



JDH-1-137 (CDC13, 400MHz) pure yellow oil - Suzuki Coupling of Iodoquinoline with 4 trifluoromethoxyphenylboronic ac

NAME JDH-1-137  
EXPNO 11  
PROCNO 1  
Date\_ 20171128  
Time\_ 19.06 h  
INSTRUM spect  
PROBHD Z108618\_0161 (   
PULPROG zg30  
TD 65536  
SOLVENT CDC13  
NS 16  
DS 2  
SWH 8012.820 Hz  
FIDRES 0.244532 Hz  
AQ 4.0894966 sec  
RG 101  
DW 62.400 usec  
DE 6.50 usec  
TE 298.8 K  
D1 1.00000000 sec  
TD0 1  
SFO1 400.1724710 MHz  
NUC1 1H  
P1 9.88 usec  
SI 65536  
SF 400.1700071 MHz  
WDW EM  
SSB 0  
LB 0.30 Hz  
GB 0  
PC 1.00

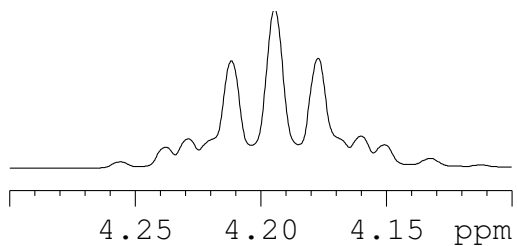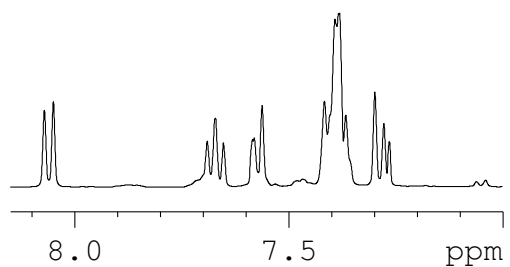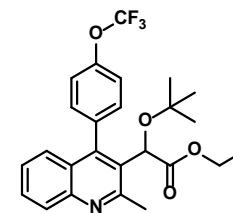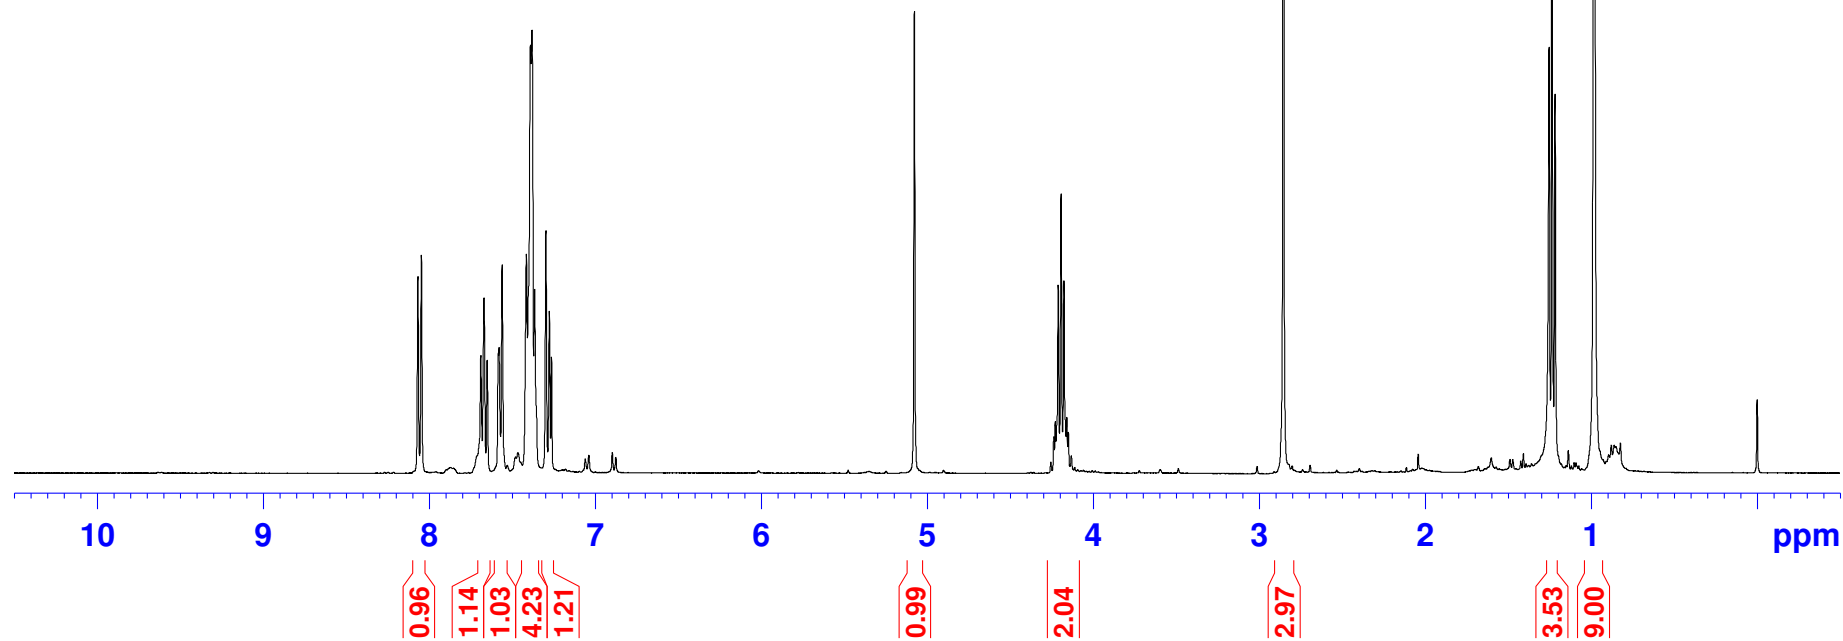

JDH-1-137 (CDCl<sub>3</sub>, 400MHz) pure yellow oil - Suzuki Coupling of Iodoquinoline with 4 trifluoromethoxy

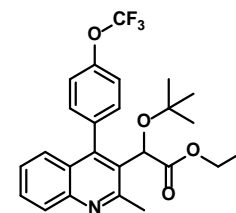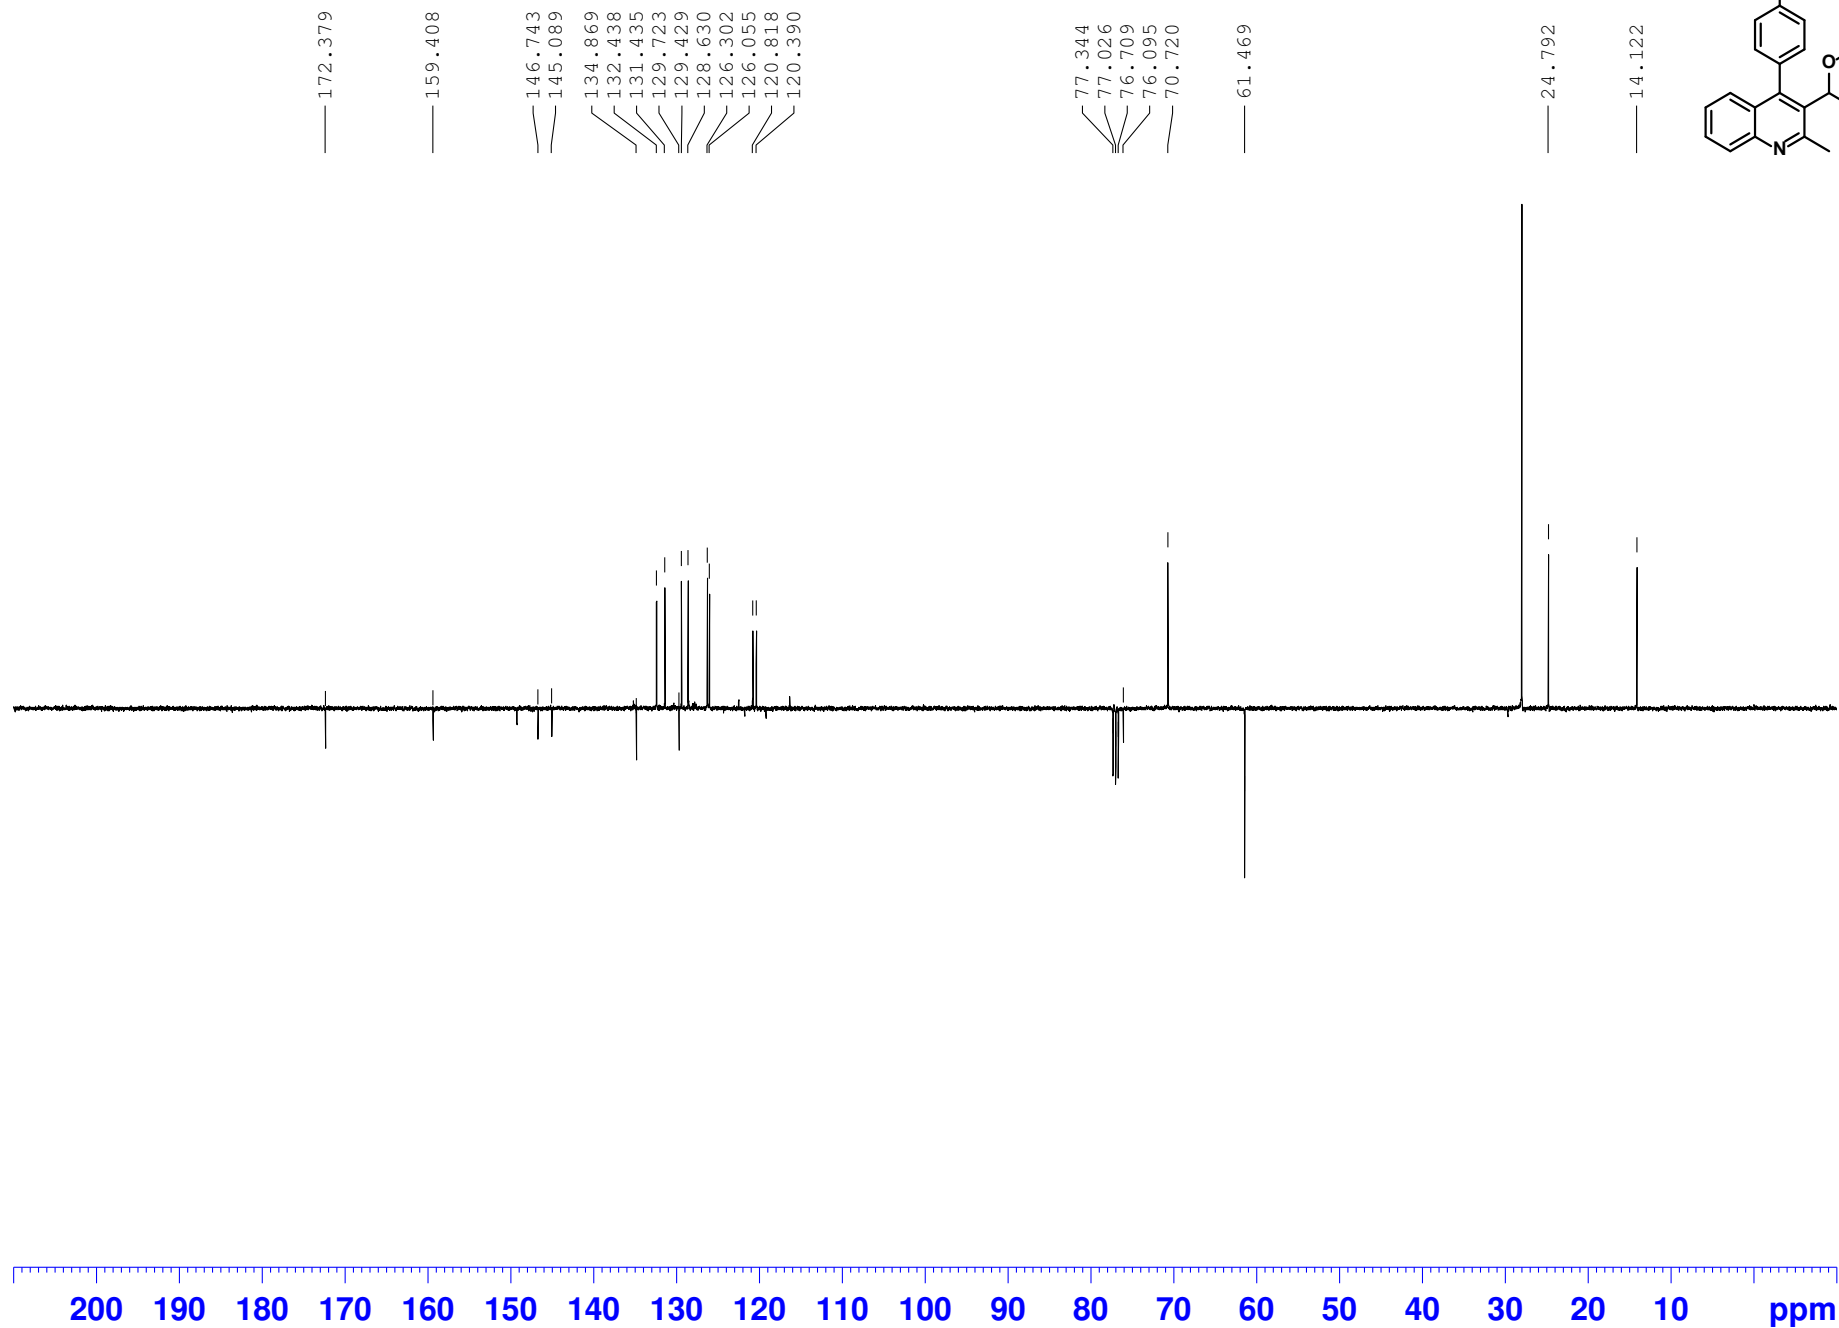

JDH-1-149 (CDC13, 400MHz) pure yellow oil - Suzuki Coupling of Iodoquinoline with 4 thiomethylphenylboronic acid

NAME JDH-1-149  
EXPNO 50  
PROCNO 1  
Date\_ 20170708  
Time\_ 15.48 h  
INSTRUM spect  
PROBHD Z108618\_0161 (   
PULPROG zg30  
TD 65536  
SOLVENT CDC13  
NS 16  
DS 2  
SWH 8012.820 Hz  
FIDRES 0.244532 Hz  
AQ 4.0894966 sec  
RG 128  
DW 62.400 usec  
DE 6.50 usec  
TE 297.6 K  
D1 1.00000000 sec  
TD0 1  
SF01 400.1724710 MHz  
NUC1 1H  
P1 9.88 usec  
SI 65536  
SF 400.1700071 MHz  
WDW EM  
SSB 0  
LB 0.30 Hz  
GB 0  
PC 1.00

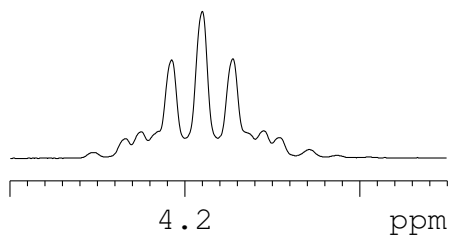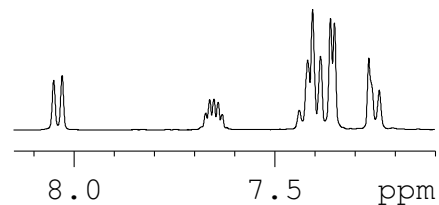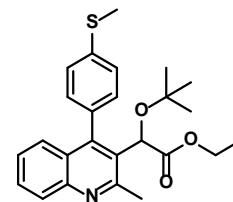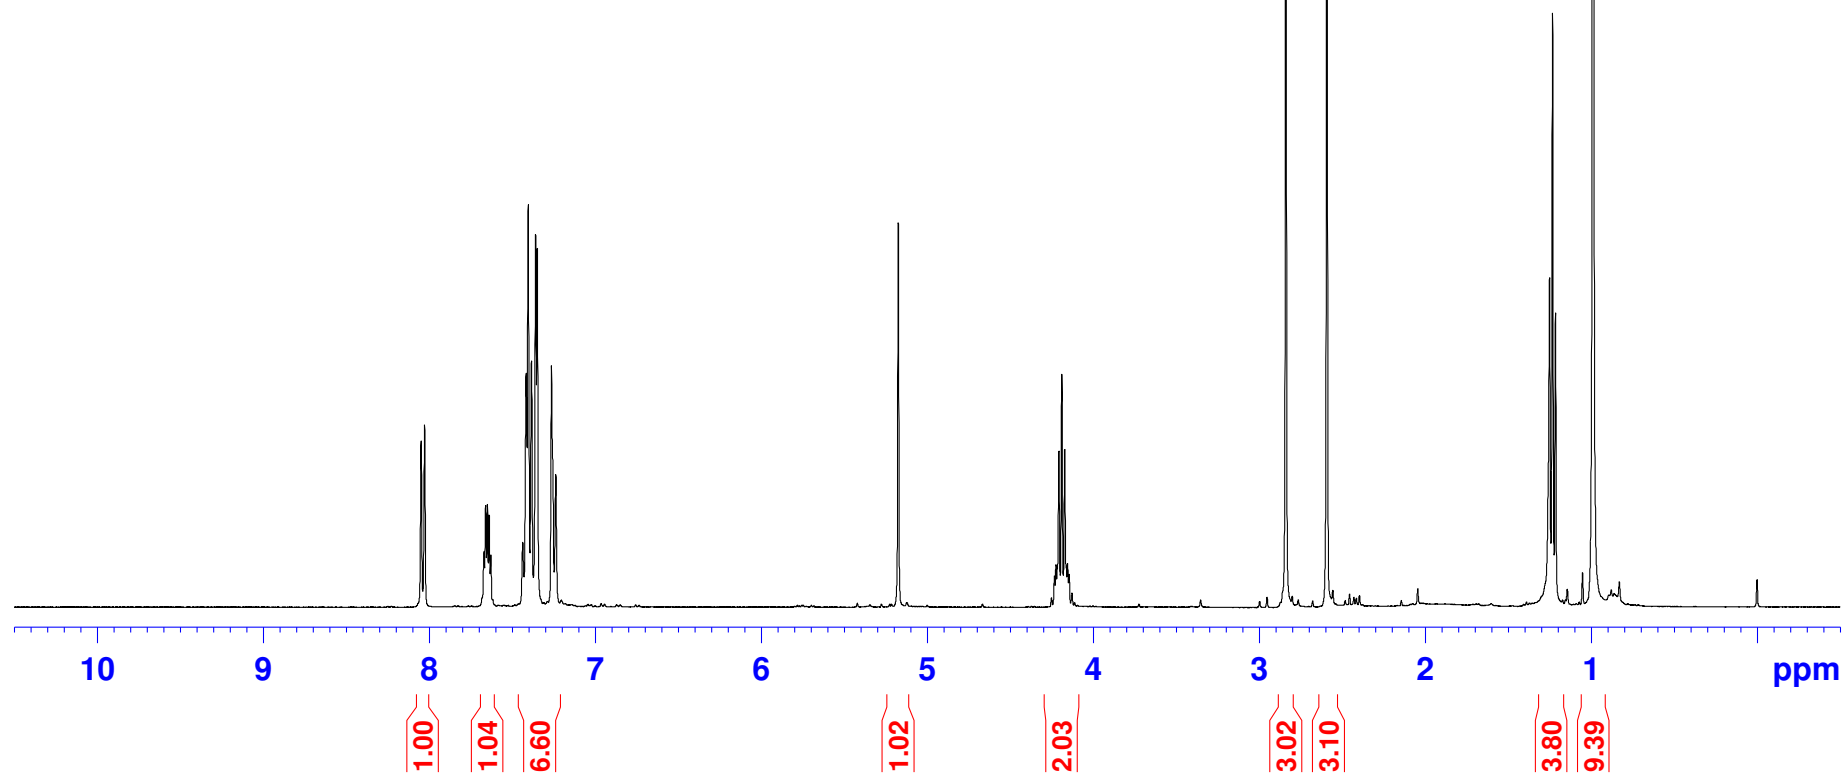

JDH-1-149 (CDCl<sub>3</sub>, 400MHz) pure yellow oil - Suzuki Coupling of Iodoquinoline with 4 thiomethylphenylboronic acid

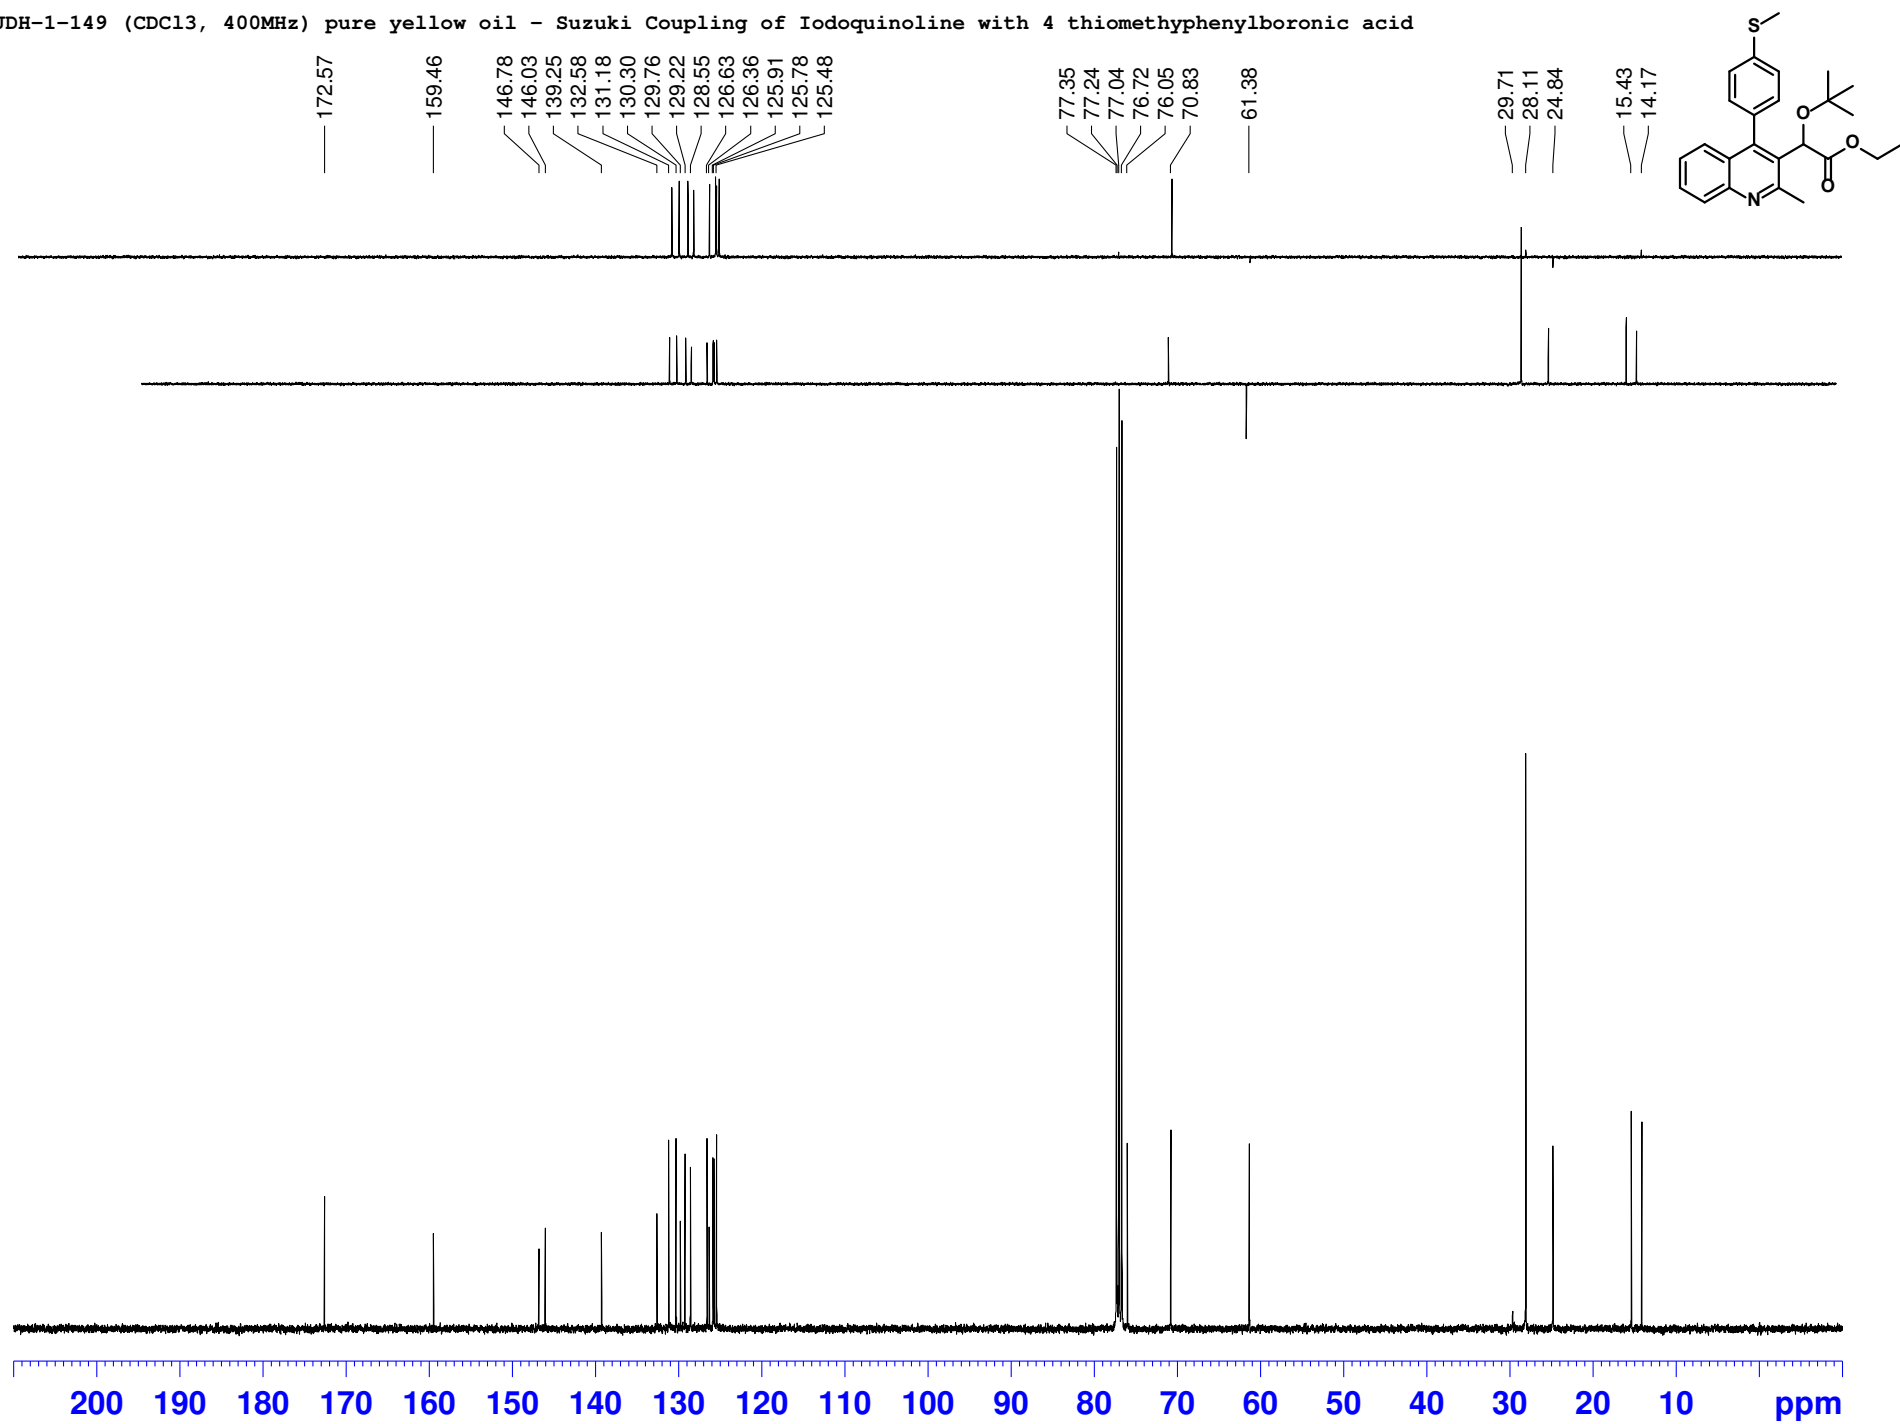

NGJ-8-078 (CDC13, 400 MHz) Pure Brown Oil - suzuki coupling of iodoquinoline with 4-cyanophenyl

```

NAME      NGJ-8-078
EXPNO     40
PROCNO    1
Date_     20171115
Time      18.42 h
INSTRUM   spect
PROBHD    Z108618_0161 (
PULPROG   zg30
TD         65536
SOLVENT   CDC13
NS         16
DS         2
SWH       8012.820 Hz
FIDRES    0.244532 Hz
AQ         4.0894966 sec
RG         144
DW         62.400 usec
DE         6.50 usec
TE         298.2 K
D1         1.00000000 sec
TD0        1
SFO1      400.1724710 MHz
NUC1       1H
P1         9.88 usec
SI         65536
SF         400.1700061 MHz
WDW        EM
SSB        0
LB         0.30 Hz
GB         0
PC         1.00
    
```

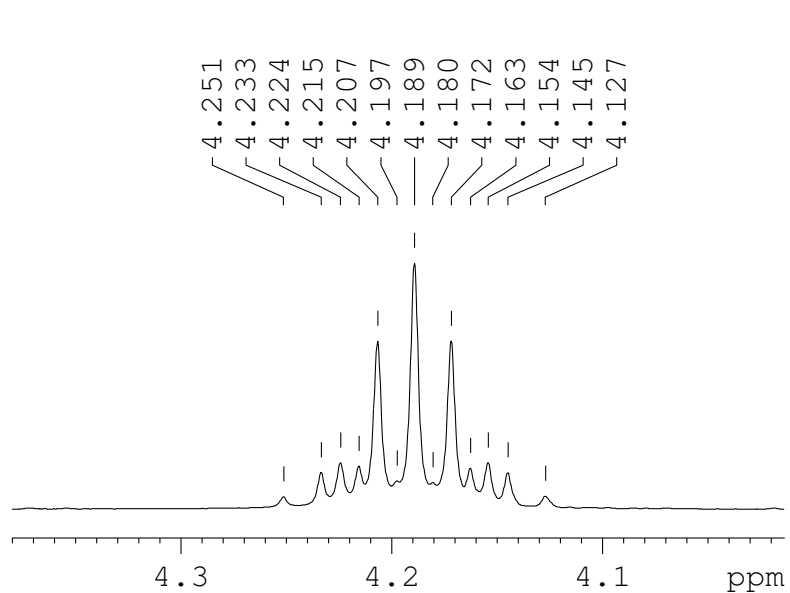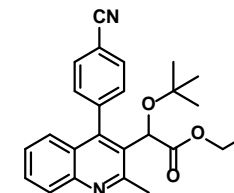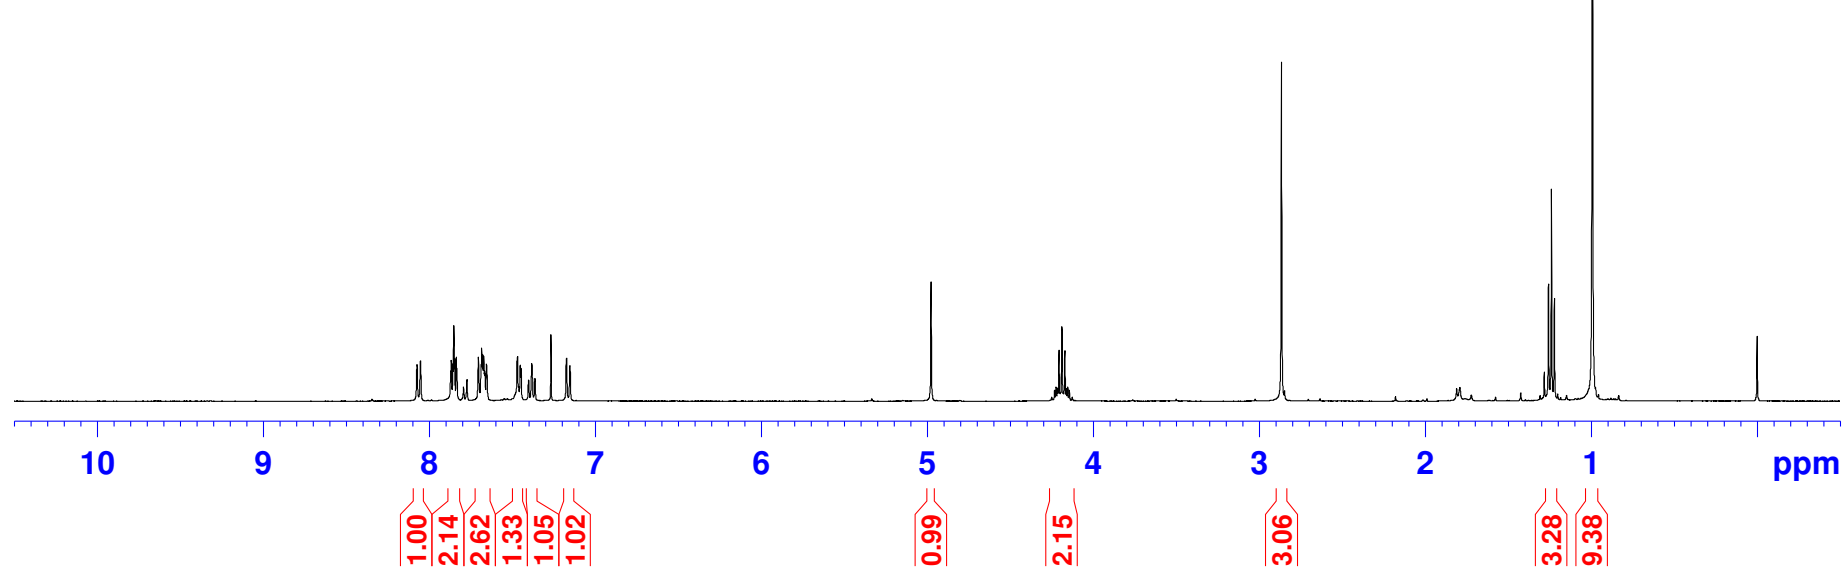

NGJ-8-078 (CDCl<sub>3</sub>, 400 MHz) Pure Brown Oil - suzuki coupling of

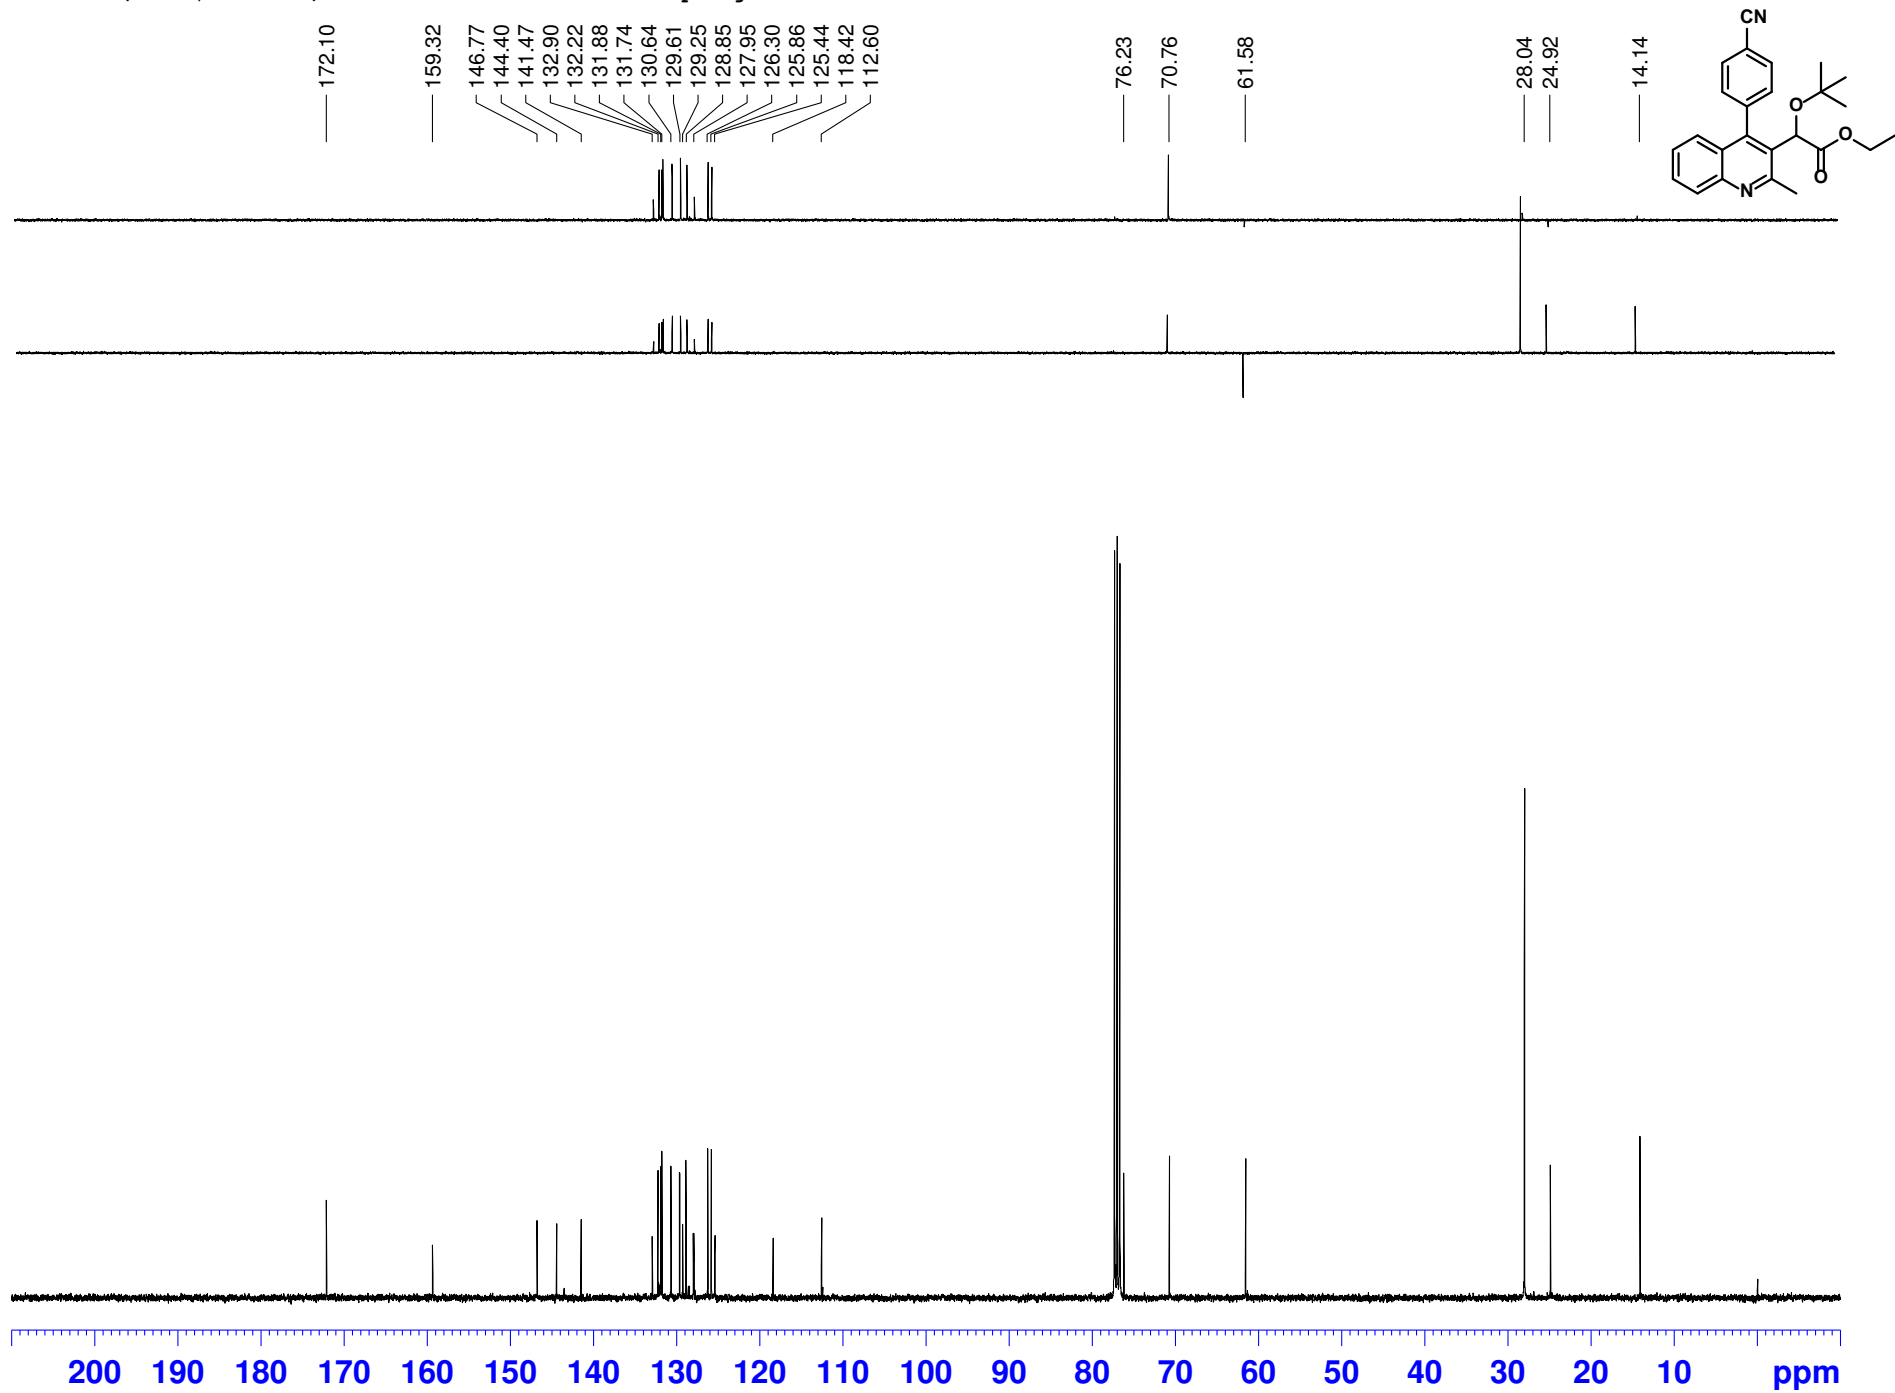

NGJ-8-072 (CDC13, 400 MHz) Pure Yellow Oil - suzuki coupling of iodoquinoline with 4-acetylph

NAME NGJ-8-072  
 EXPNO 60  
 PROCNO 1  
 Date\_ 20171127  
 Time\_ 19.44 h  
 INSTRUM spect  
 PROBHD Z108618\_0161 (  
 PULPROG zg30  
 TD 65536  
 SOLVENT CDC13  
 NS 16  
 DS 2  
 SWH 8012.820 Hz  
 FIDRES 0.244532 Hz  
 AQ 4.0894966 sec  
 RG 128  
 DW 62.400 usec  
 DE 6.50 usec  
 TE 298.2 K  
 D1 1.00000000 sec  
 TD0 1  
 SFO1 400.1724710 MHz  
 NUC1 1H  
 P1 9.88 usec  
 SI 65536  
 SF 400.1700053 MHz  
 WDW EM  
 SSB 0  
 LB 0.30 Hz  
 GB 0  
 PC 1.00

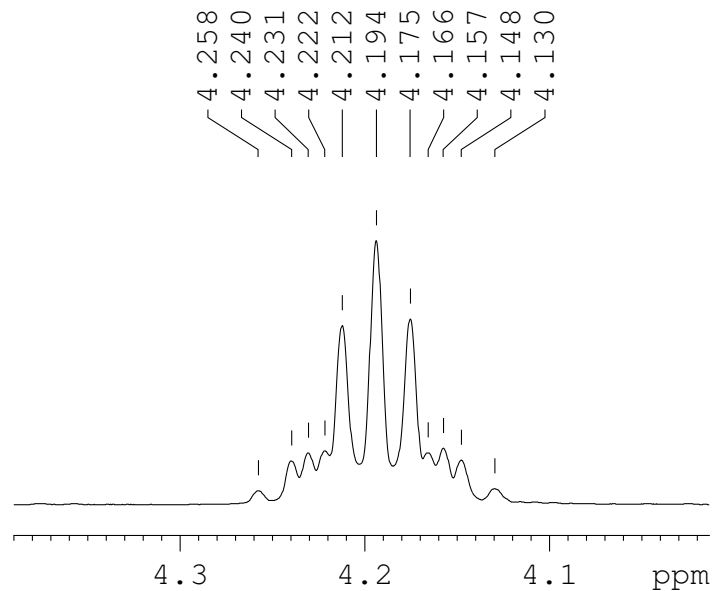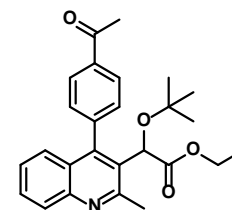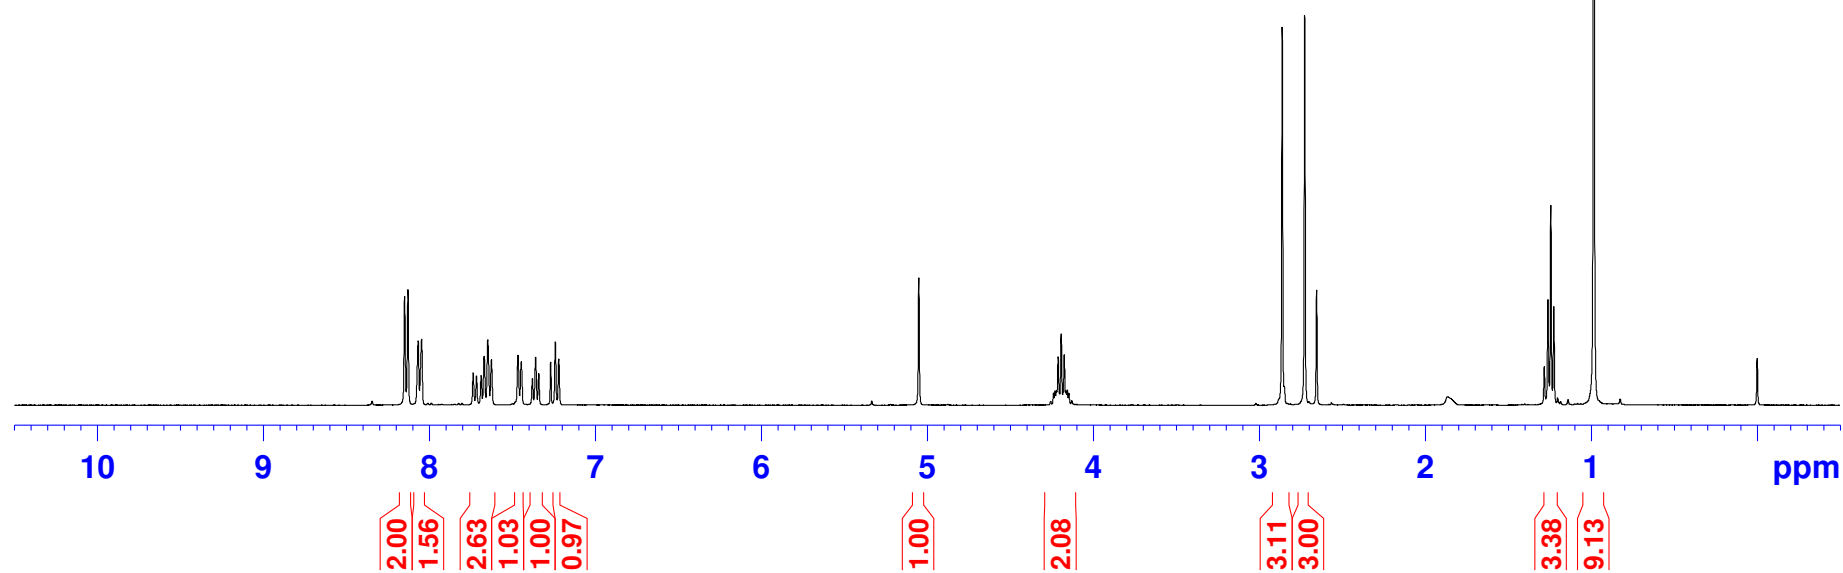

NGJ-8-072 (CDCl<sub>3</sub>, 400 MHz) Pure Yellow Oil - suzuki coupling of iodoquinoline with 4-acetylphenylboro

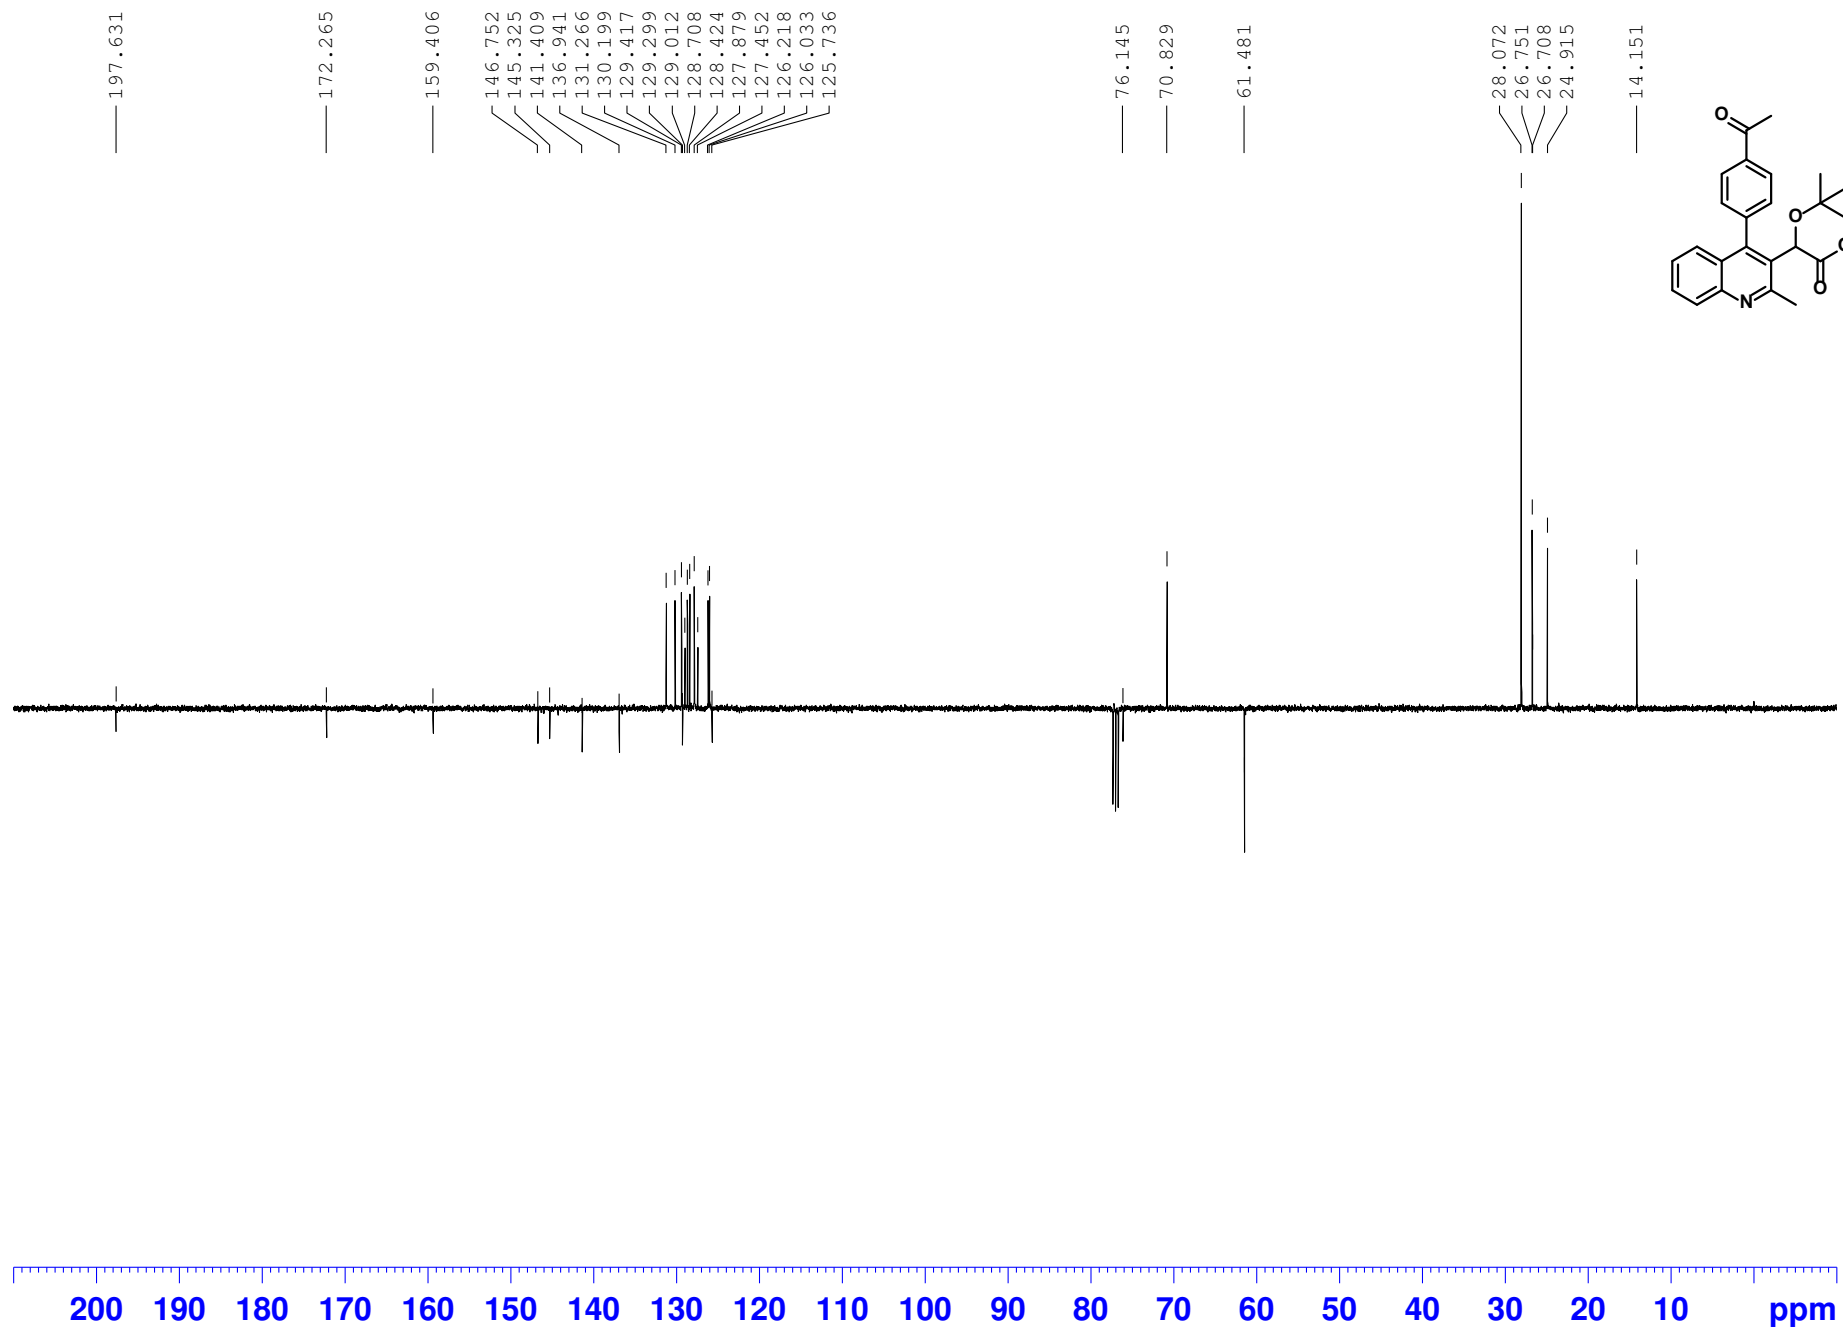



NGJ-8-082 (CDC13, 400 MHz) Pure Yellow Oil - suzuki coupling of iodoquinoline with 4-acetamid

NAME NGJ-8-082  
 EXPNO 20  
 PROCNO 1  
 Date\_ 20171012  
 Time\_ 10.35 h  
 INSTRUM spect  
 PROBHD Z108618\_0161 (   
 PULPROG zg30  
 TD 65536  
 SOLVENT CDC13  
 NS 16  
 DS 2  
 SWH 8012.820 Hz  
 FIDRES 0.244532 Hz  
 AQ 4.0894966 sec  
 RG 128  
 DW 62.400 usec  
 DE 6.50 usec  
 TE 297.2 K  
 D1 1.00000000 sec  
 TD0 1  
 SFO1 400.1724710 MHz  
 NUC1 1H  
 P1 9.88 usec  
 SI 65536  
 SF 400.1700054 MHz  
 WDW EM  
 SSB 0  
 LB 0.30 Hz  
 GB 0  
 PC 1.00

4.246  
 4.228  
 4.219  
 4.210  
 4.206  
 4.201  
 4.188  
 4.183  
 4.171  
 4.166  
 4.162  
 4.153  
 4.144  
 4.136  
 4.126  
 4.123  
 4.118

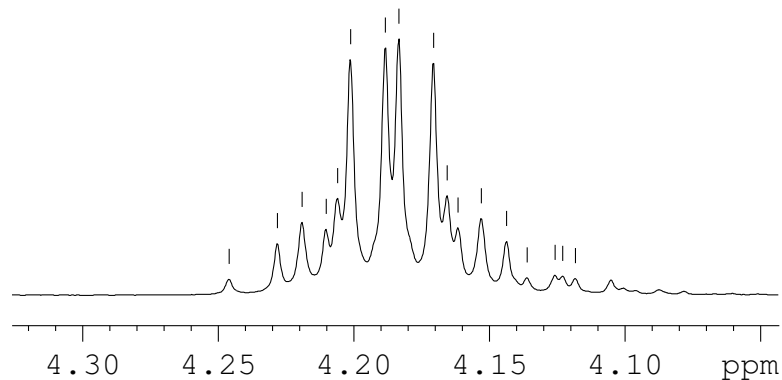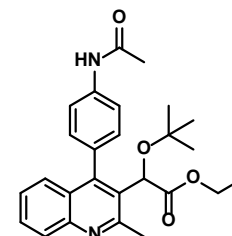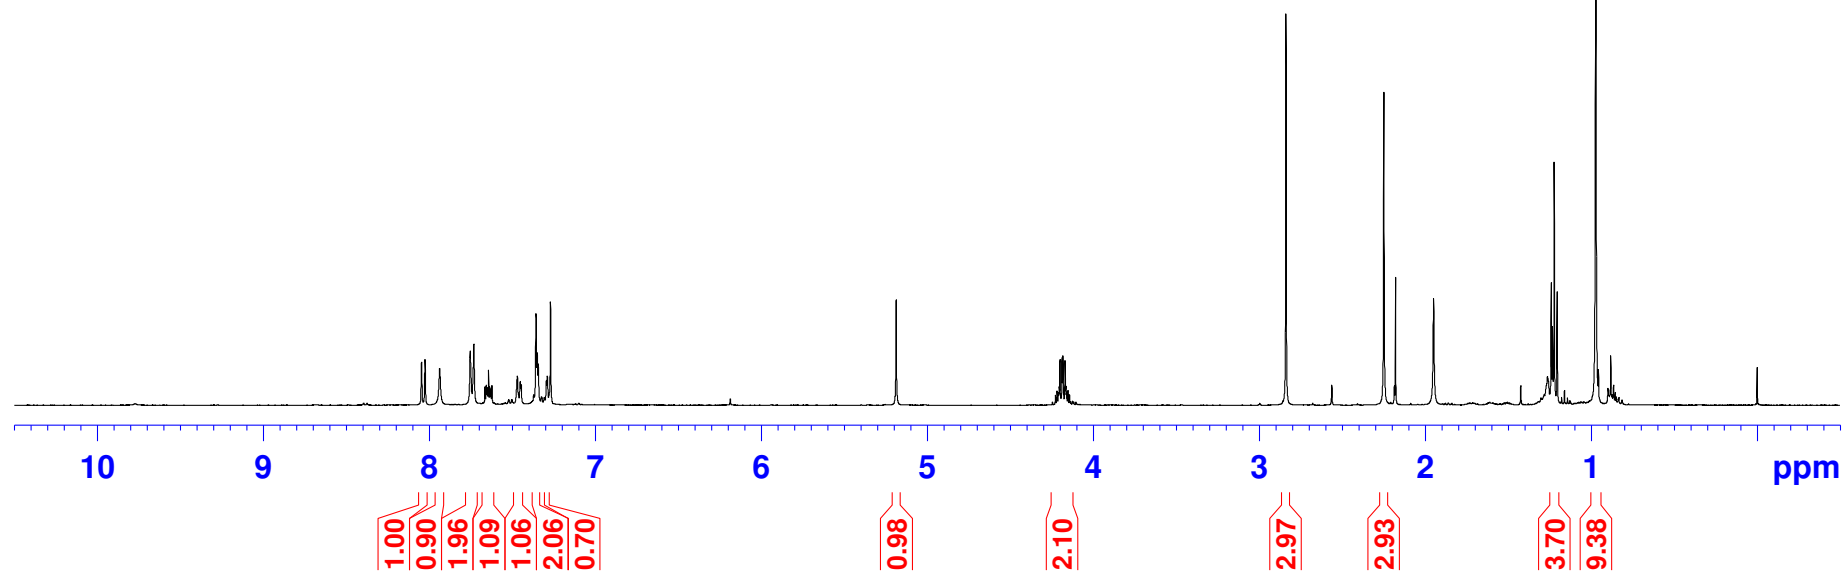

NGJ-8-082 (CDC13, 400 MHz) Pure Yellow Oil - suzuki coupling of iodoquinoline with 4-acetamido phenyl

MISSISS

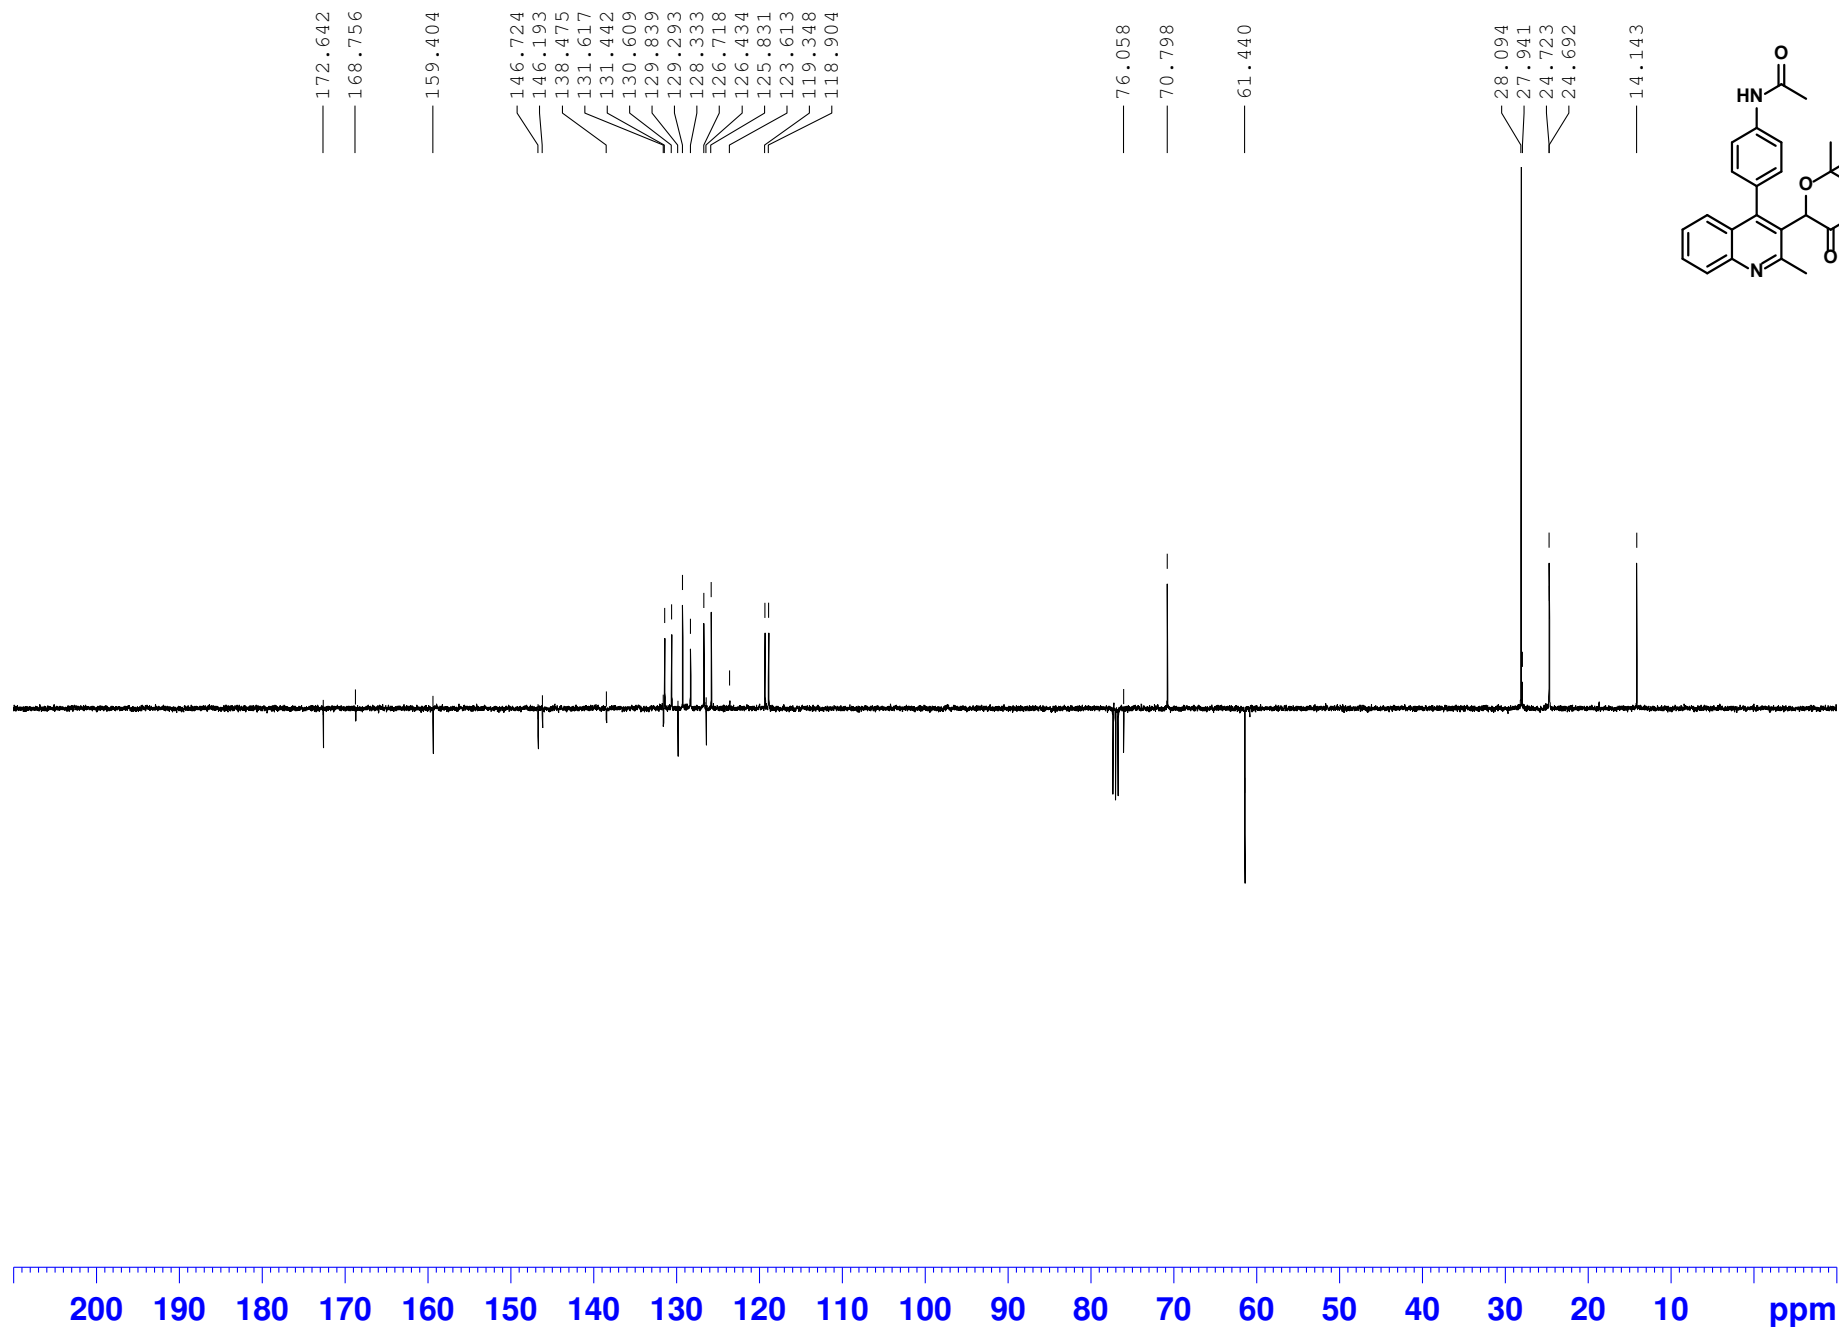

# AH-3-39 Characterization

MISSISS

NAME AH-3-39  
EXPNO 70  
PROCNO 1  
Date\_ 20171205  
Time 17.10 h  
INSTRUM spect  
PROBHD z108618\_0161 (  
PULPROG zg30  
TD 65536  
SOLVENT CDC13  
NS 16  
DS 2  
SWH 8012.820 Hz  
FIDRES 0.244532 Hz  
AQ 4.0894966 sec  
RG 203  
DW 62.400 usec  
DE 6.50 usec  
TE 298.2 K  
D1 1.00000000 sec  
TDO 1  
SFO1 400.1724710 MHz  
NUC1 1H  
P1 9.88 usec  
SI 65536  
SF 400.1700089 MHz  
WDW EM  
SSB 0  
LB 0.30 Hz  
GB 0  
PC 1.00

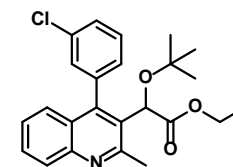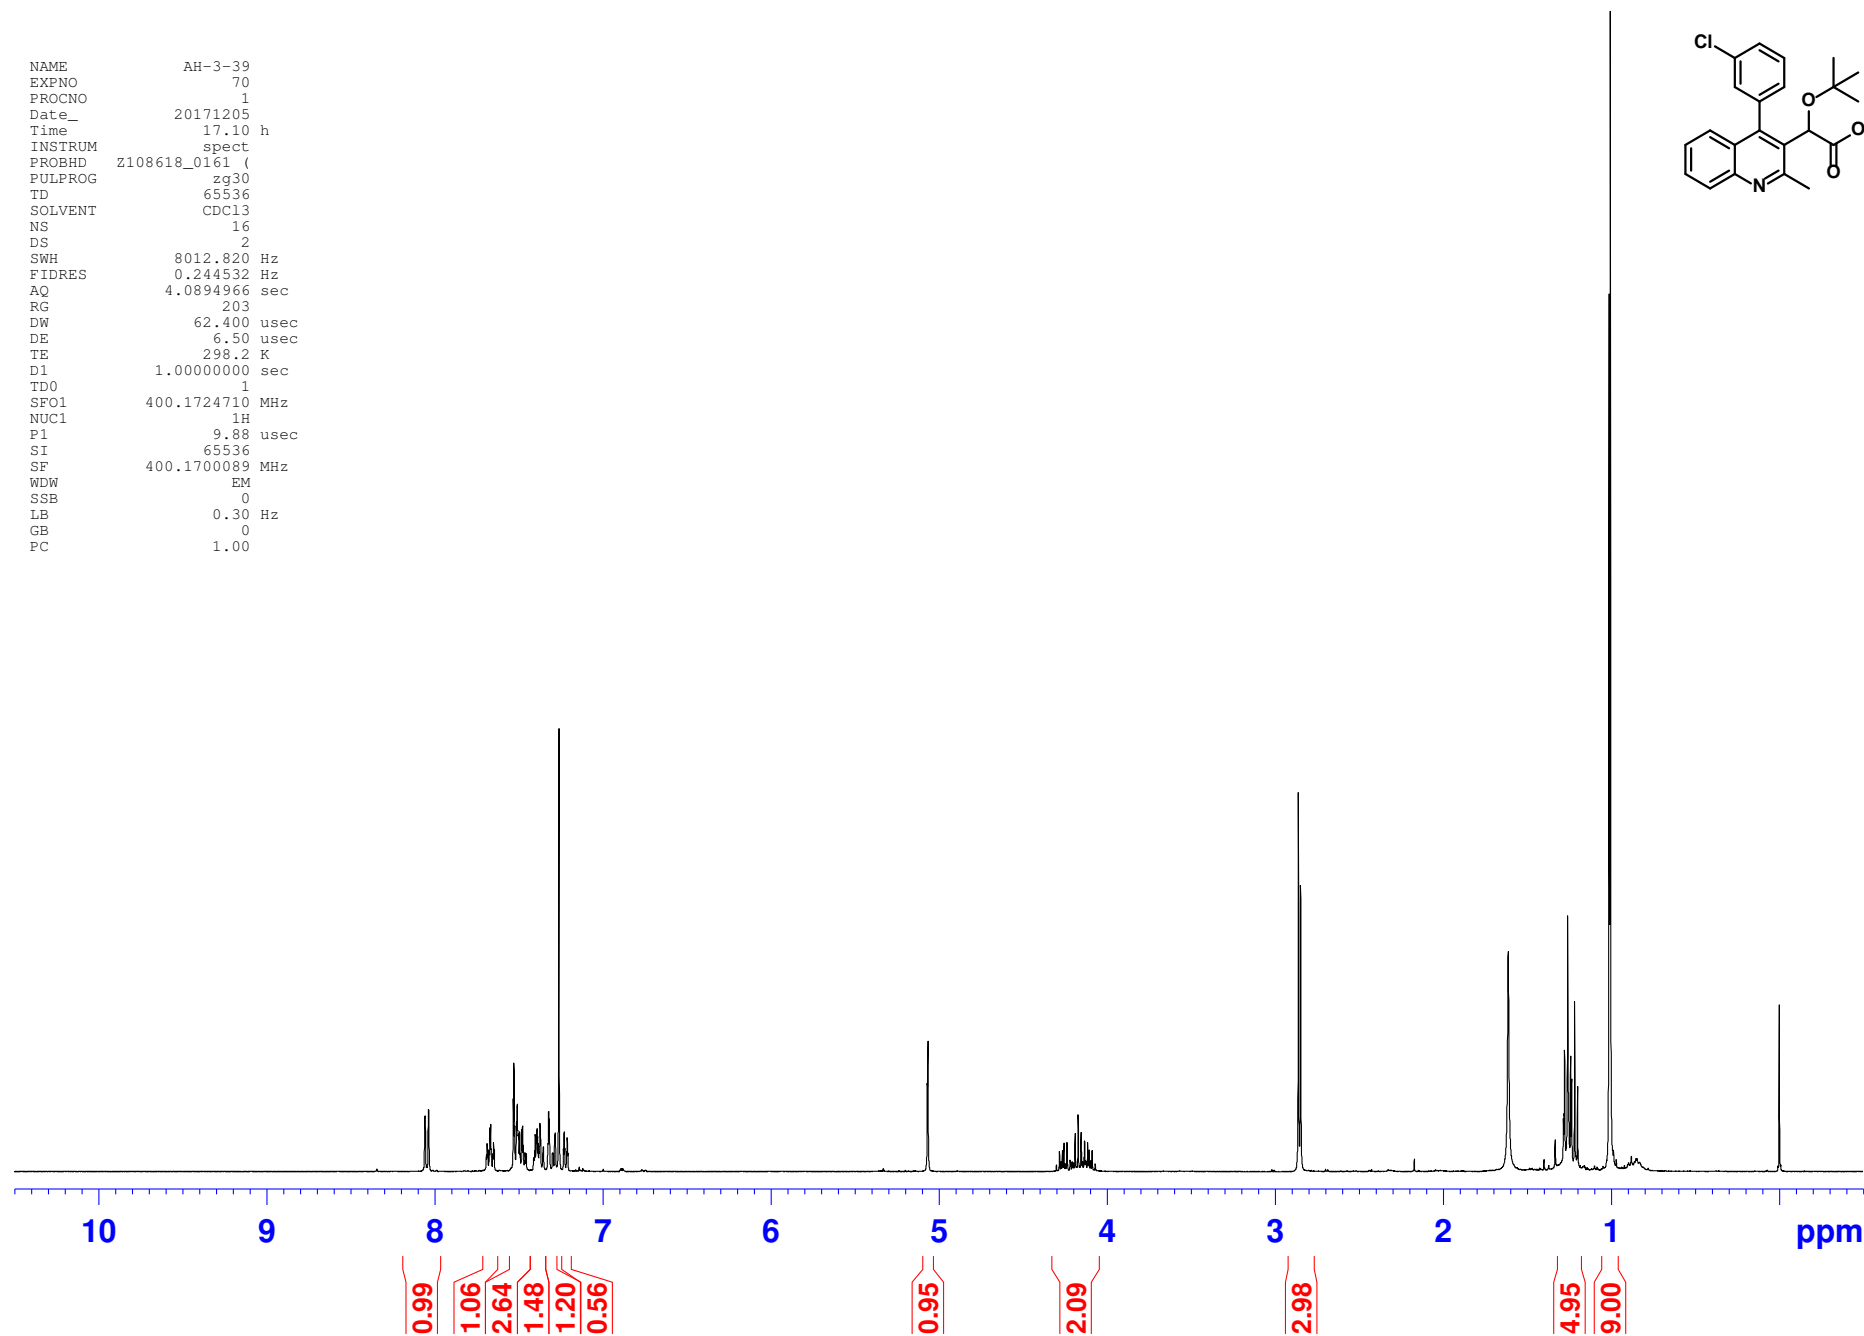

# AH-3-39 Characterization

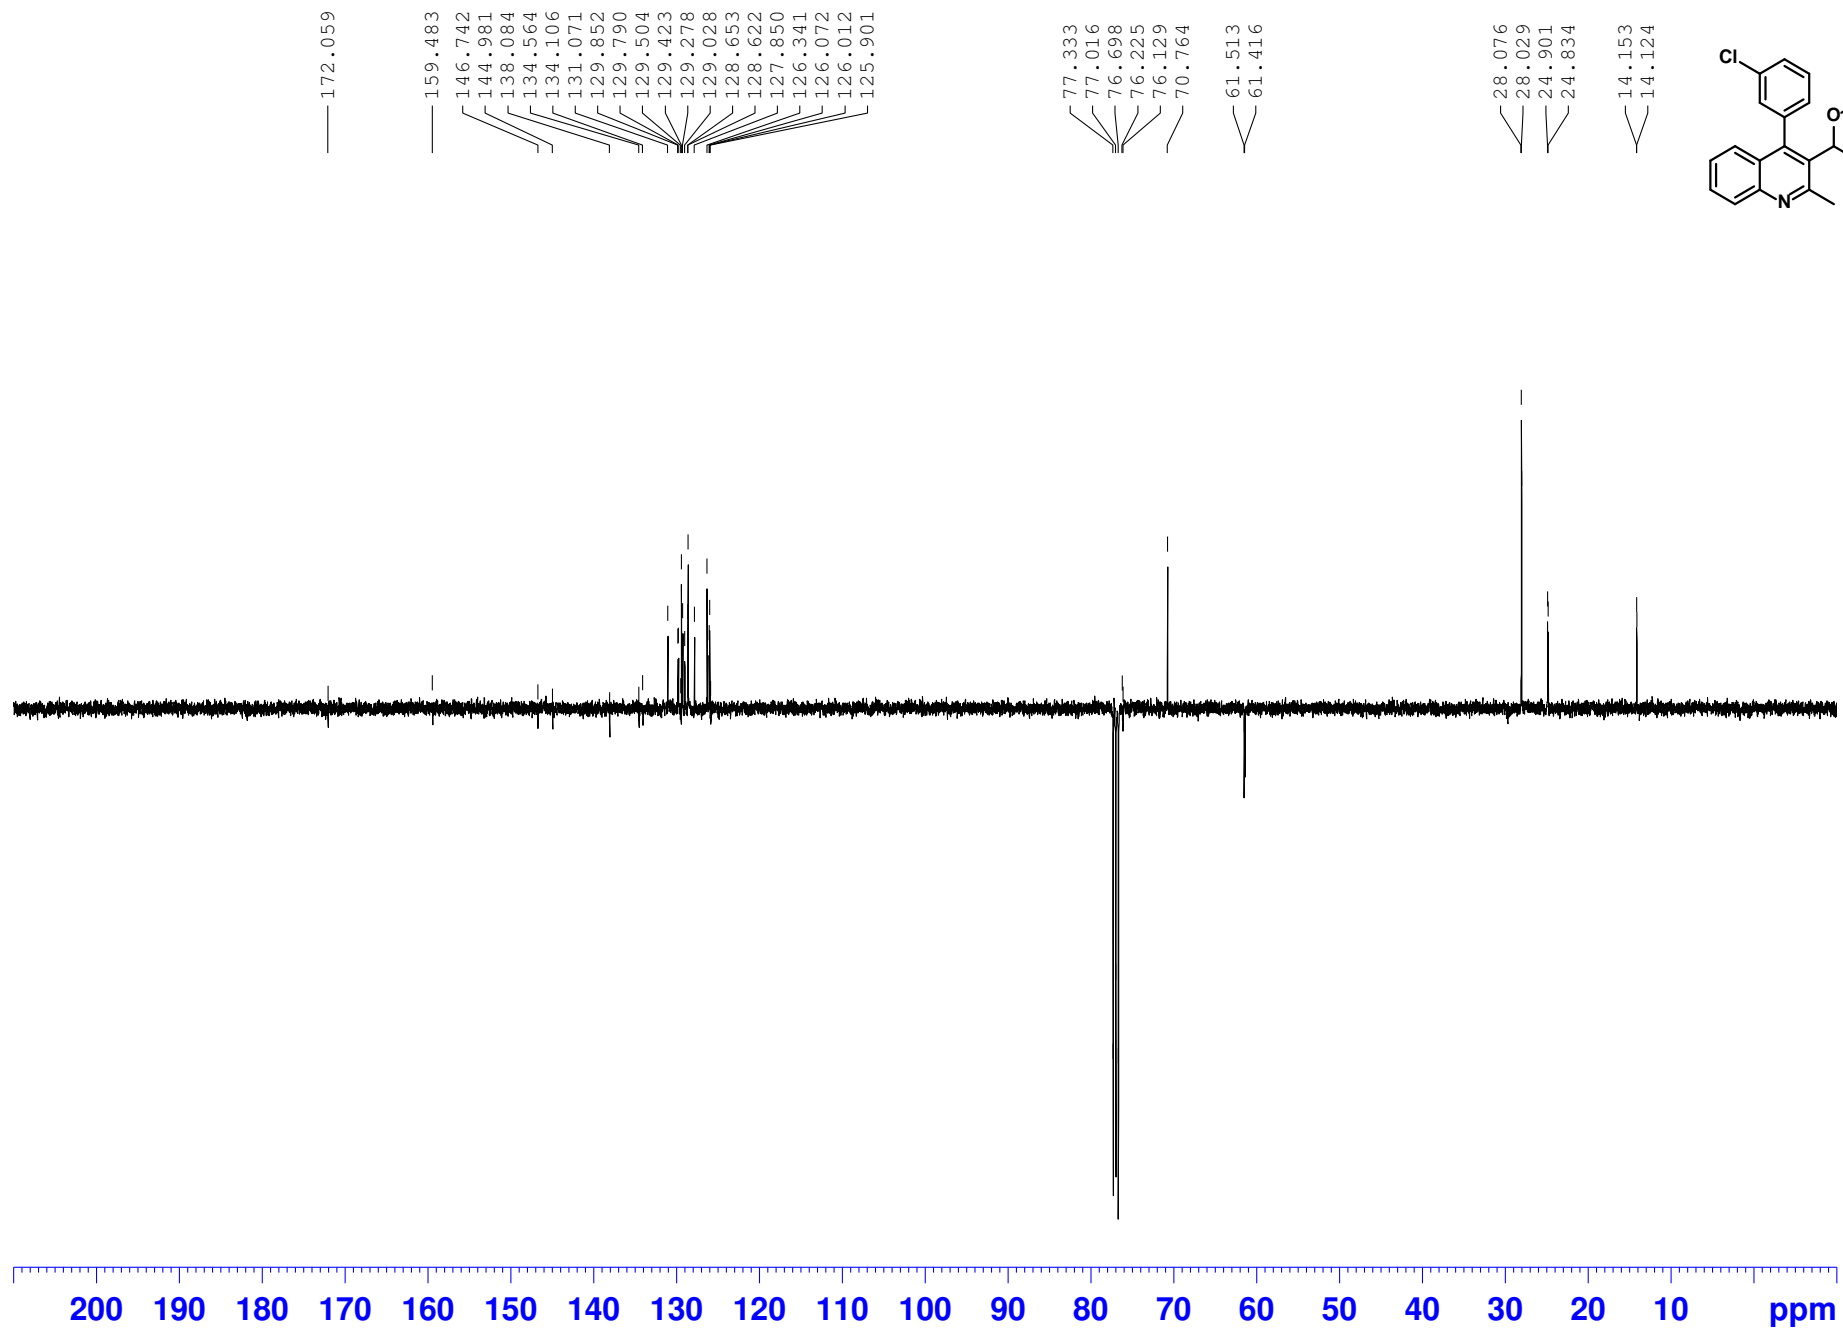

```

NAME      AH-3-44
EXPNO     20
PROCNO    1
Date_     20171110
Time      10.24 h
INSTRUM   spect
PROBHD    z108618_0161 (
PULPROG   zg30
TD        65536
SOLVENT   CDC13
NS        16
DS        2
SWH       8012.820 Hz
FIDRES    0.244532 Hz
AQ        4.0894966 sec
RG        90.5
DW        62.400 usec
DE        6.50 usec
TE        298.2 K
D1        1.00000000 sec
TDO       1
SFO1      400.1724710 MHz
NUC1      1H
P1        9.88 usec
SI        65536
SF        400.1700090 MHz
WDW       EM
SSB       0
LB        0.30 Hz
GB        0
PC        1.00
    
```

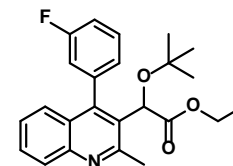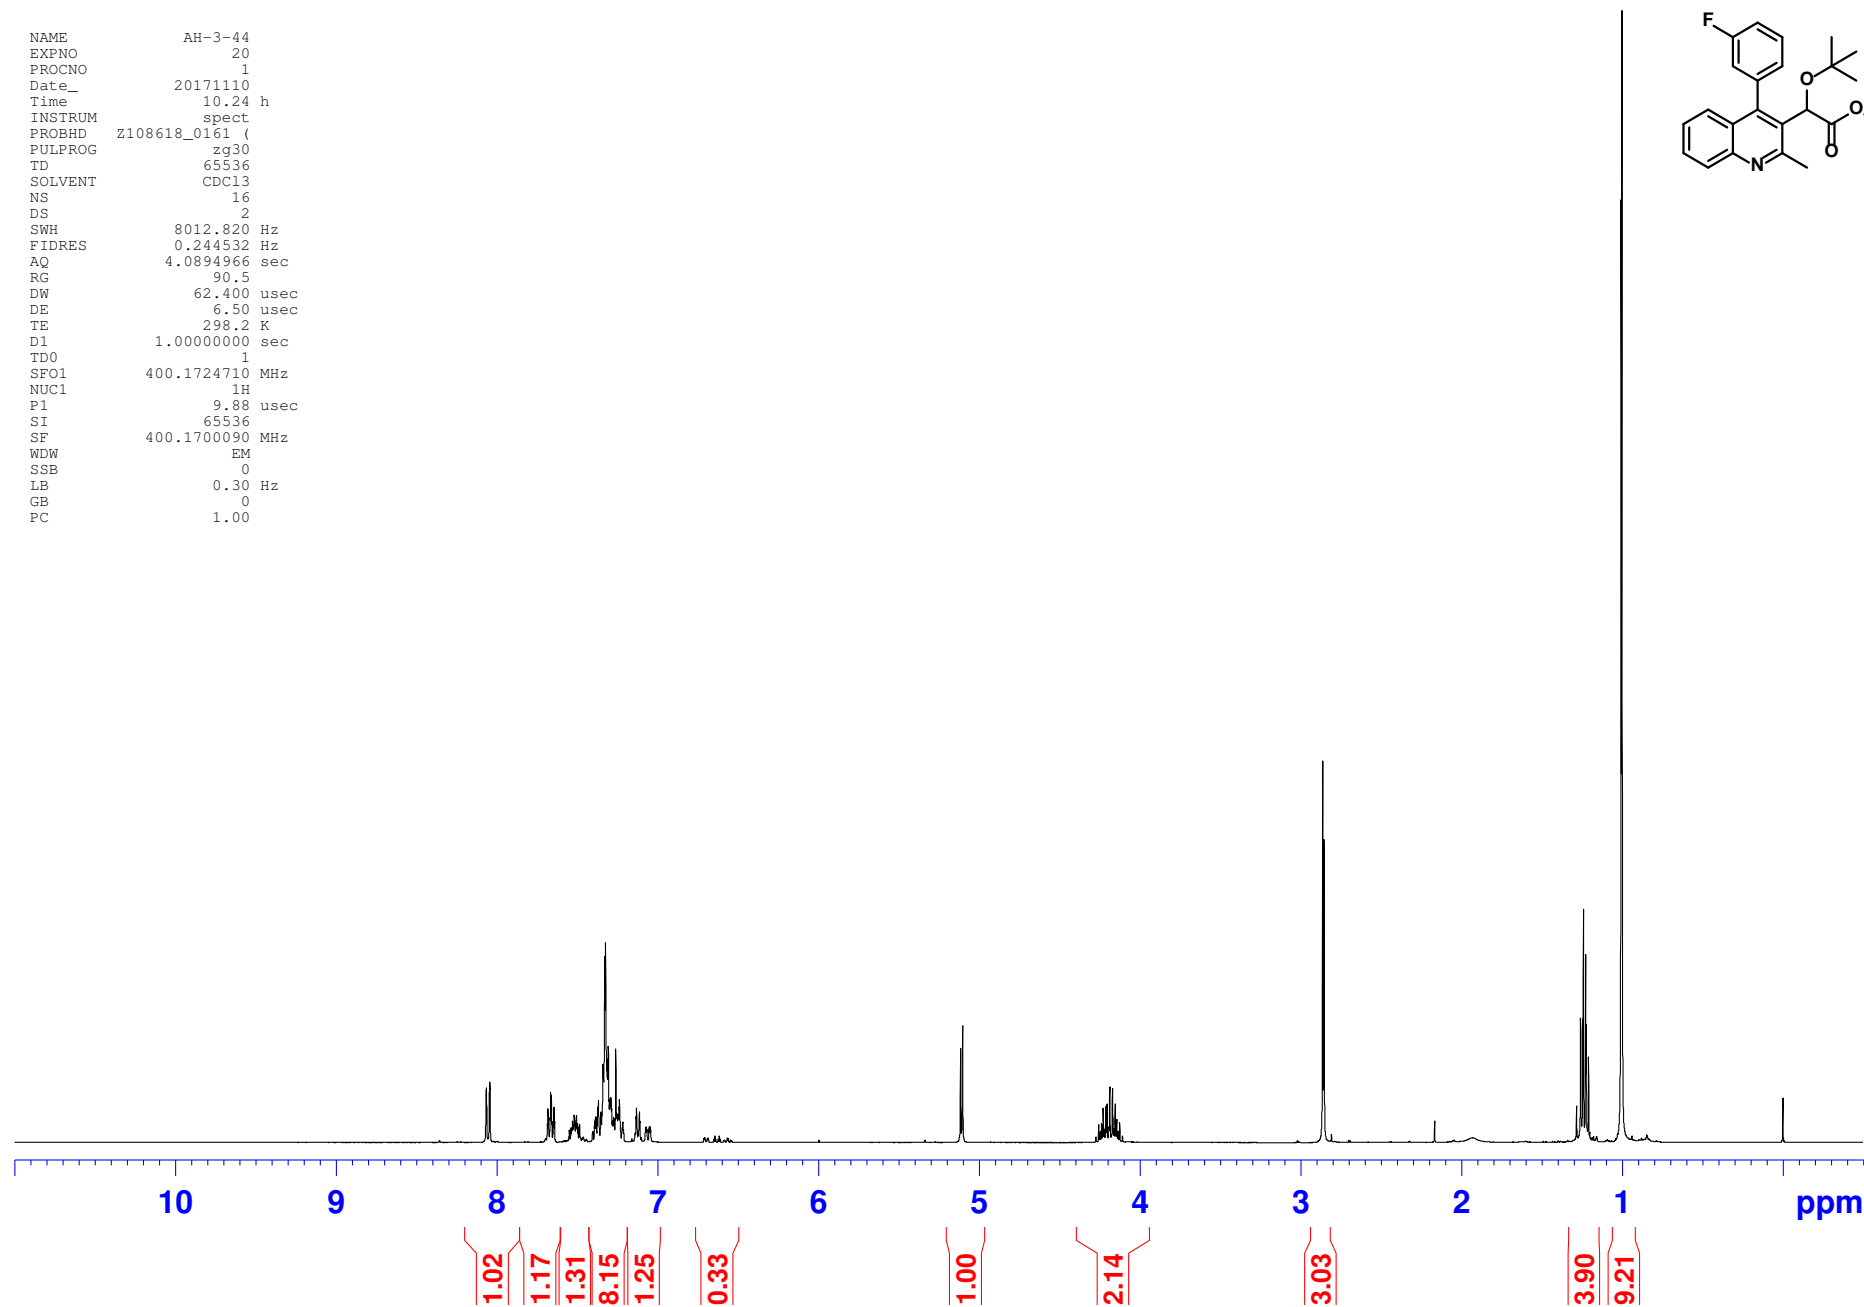

AH-3-44 Characterization

MISSISS

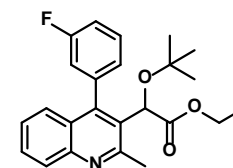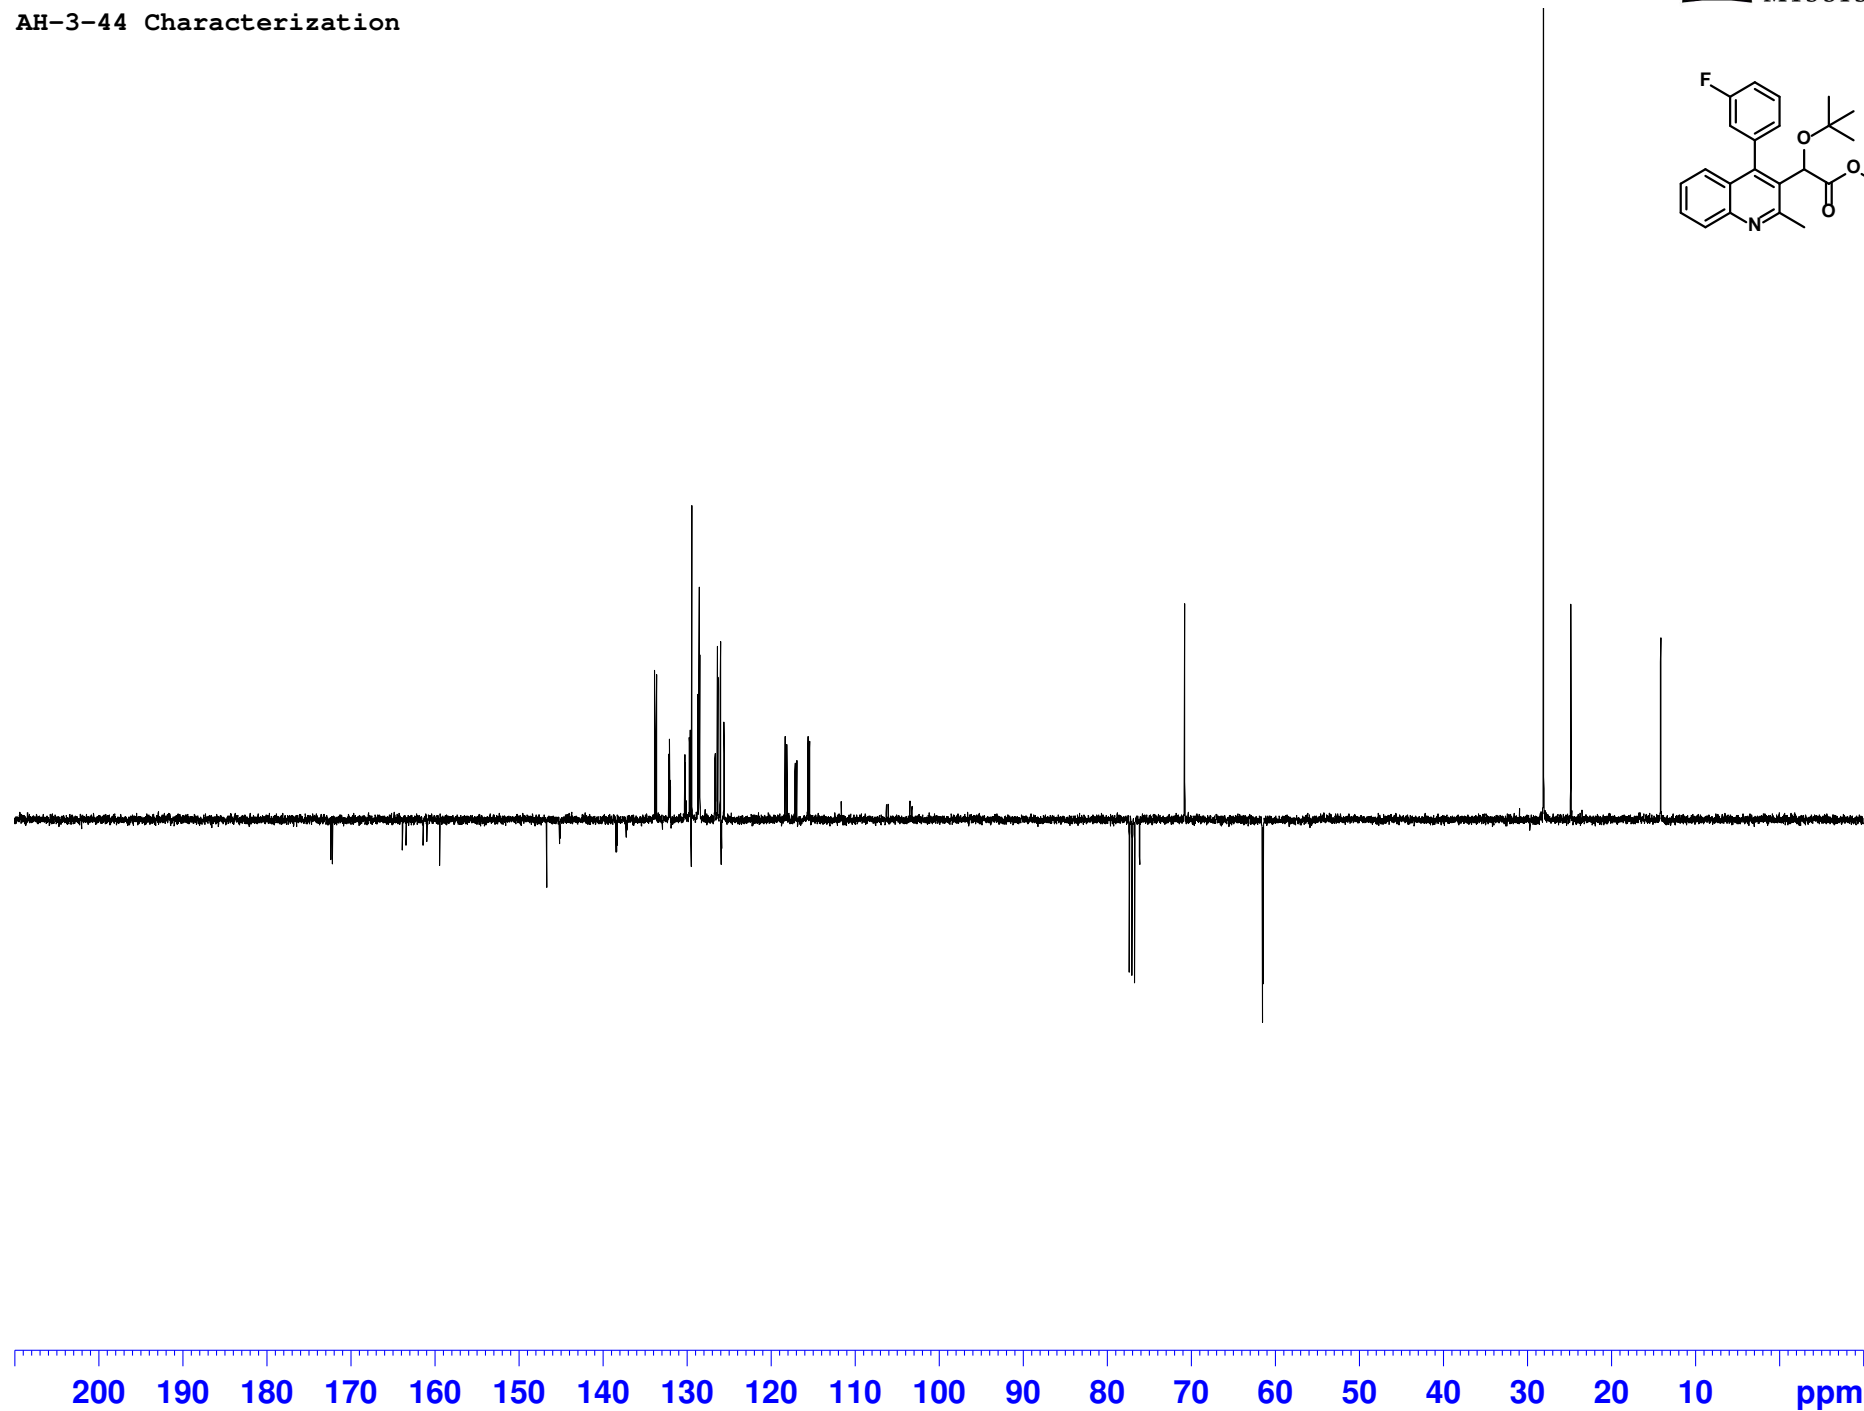

# AH-3-59 Characterization

MISSISS

NAME AH-3-59  
EXPNO 50  
PROCNO 1  
Date\_ 20171219  
Time 14.53 h  
INSTRUM spect  
PROBHD z108618\_0161 (  
PULPROG zg30  
TD 65536  
SOLVENT CDC13  
NS 16  
DS 2  
SWH 8012.820 Hz  
FIDRES 0.244532 Hz  
AQ 4.0894966 sec  
RG 80.6  
DW 62.400 usec  
DE 6.50 usec  
TE 298.3 K  
D1 1.00000000 sec  
TDO 1  
SFO1 400.1724710 MHz  
NUC1 1H  
P1 9.88 usec  
SI 65536  
SF 400.1700084 MHz  
WDW EM  
SSB 0  
LB 0.30 Hz  
GB 0  
PC 1.00

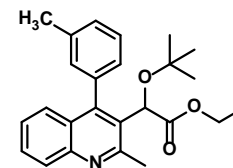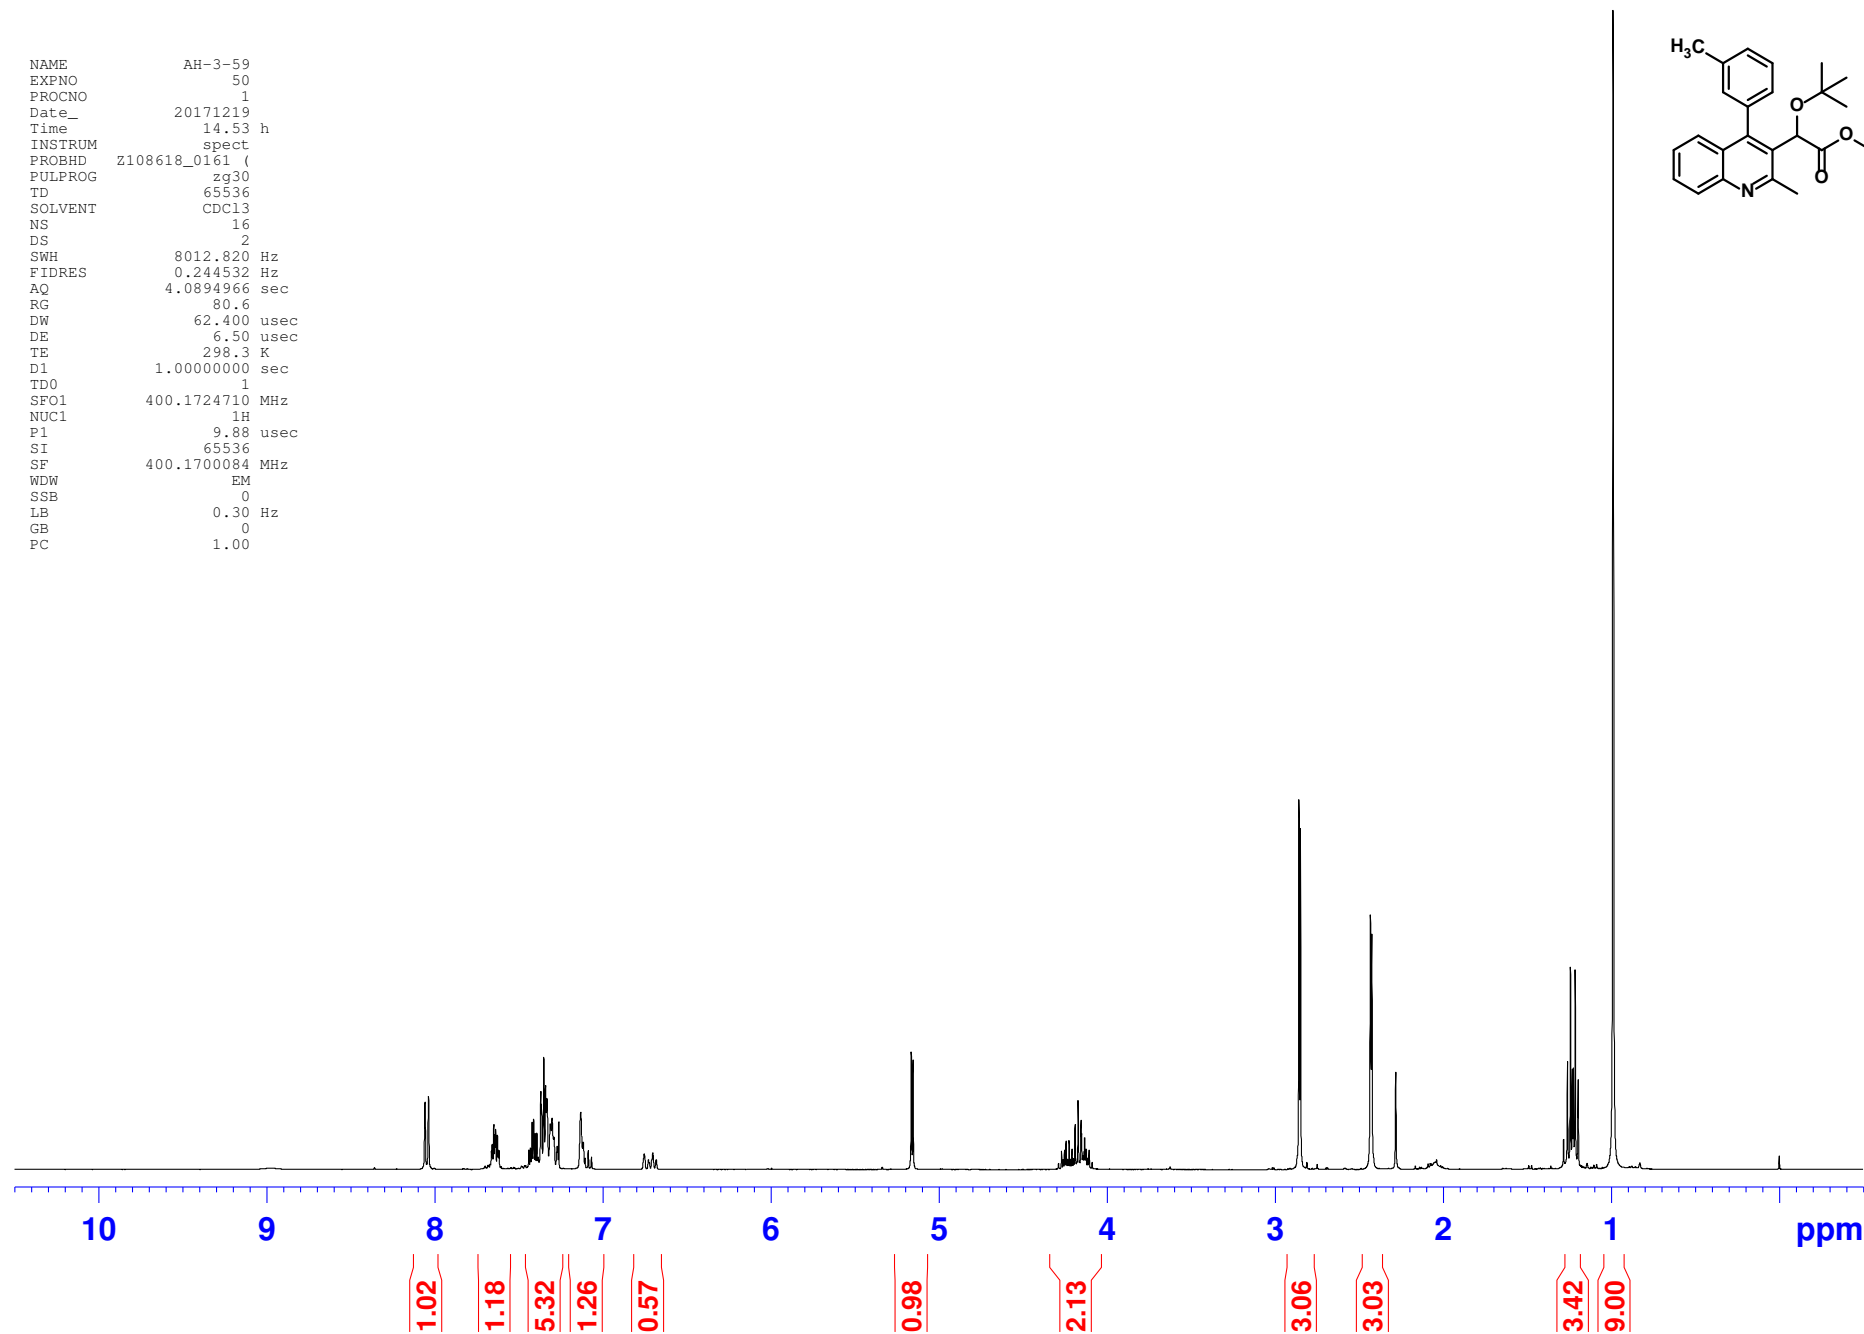

AH-3-59 Characterization

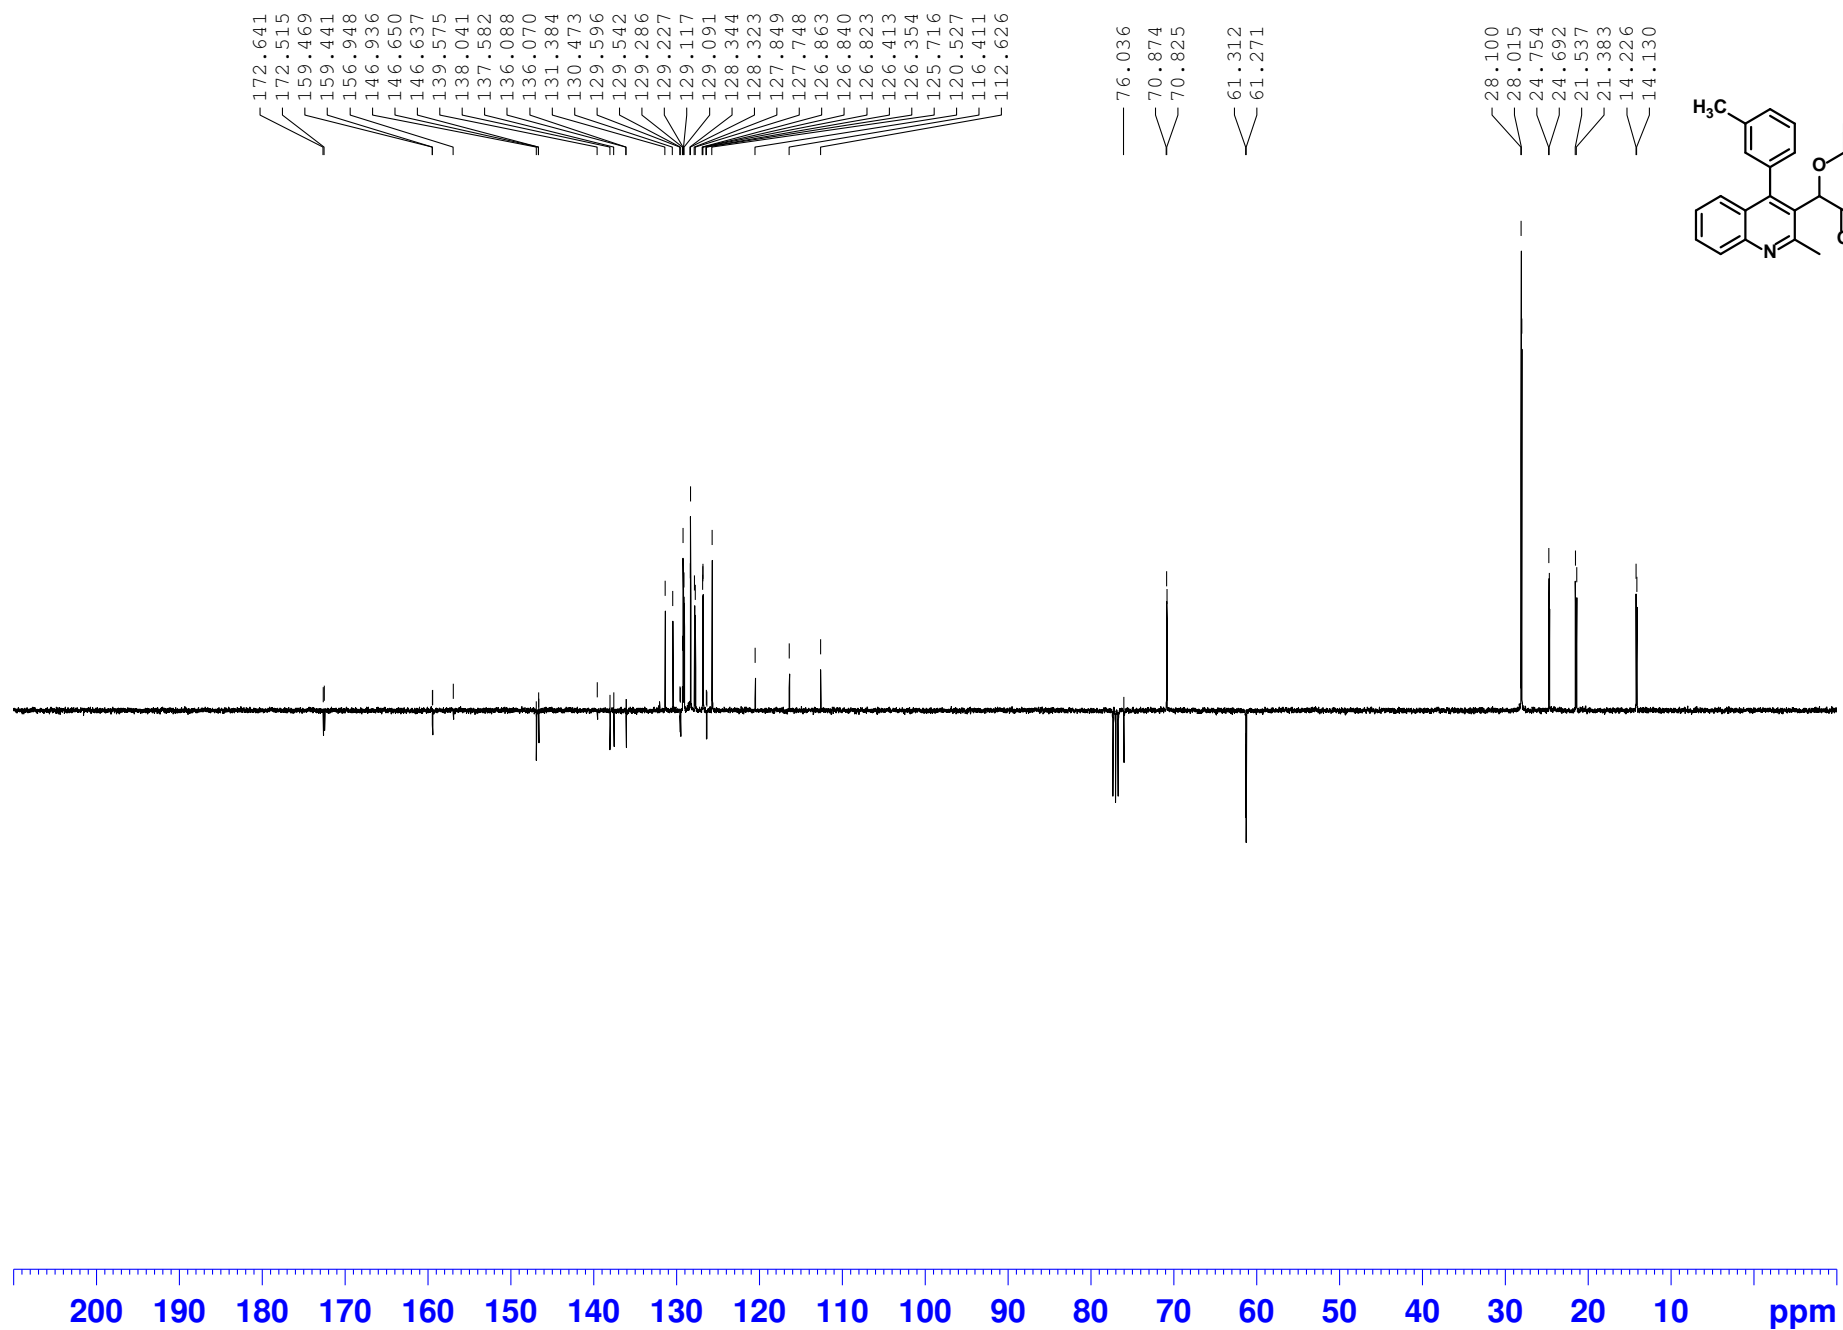



# AH-3-27 Characterization

MISSISS

NAME AH-3-27  
EXPNO 30  
PROCNO 1  
Date\_ 20171103  
Time 18.03 h  
INSTRUM spect  
PROBHD z108618\_0161 (  
PULPROG zg30  
TD 65536  
SOLVENT CDC13  
NS 16  
DS 2  
SWH 8012.820 Hz  
FIDRES 0.244532 Hz  
AQ 4.0894966 sec  
RG 71.8  
DW 62.400 usec  
DE 6.50 usec  
TE 298.2 K  
D1 1.00000000 sec  
TDO 1  
SFO1 400.1724710 MHz  
NUC1 1H  
P1 9.88 usec  
SI 65536  
SF 400.1700072 MHz  
WDW EM  
SSB 0  
LB 0.30 Hz  
GB 0  
PC 1.00

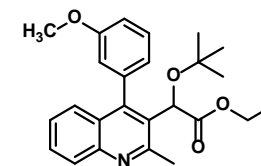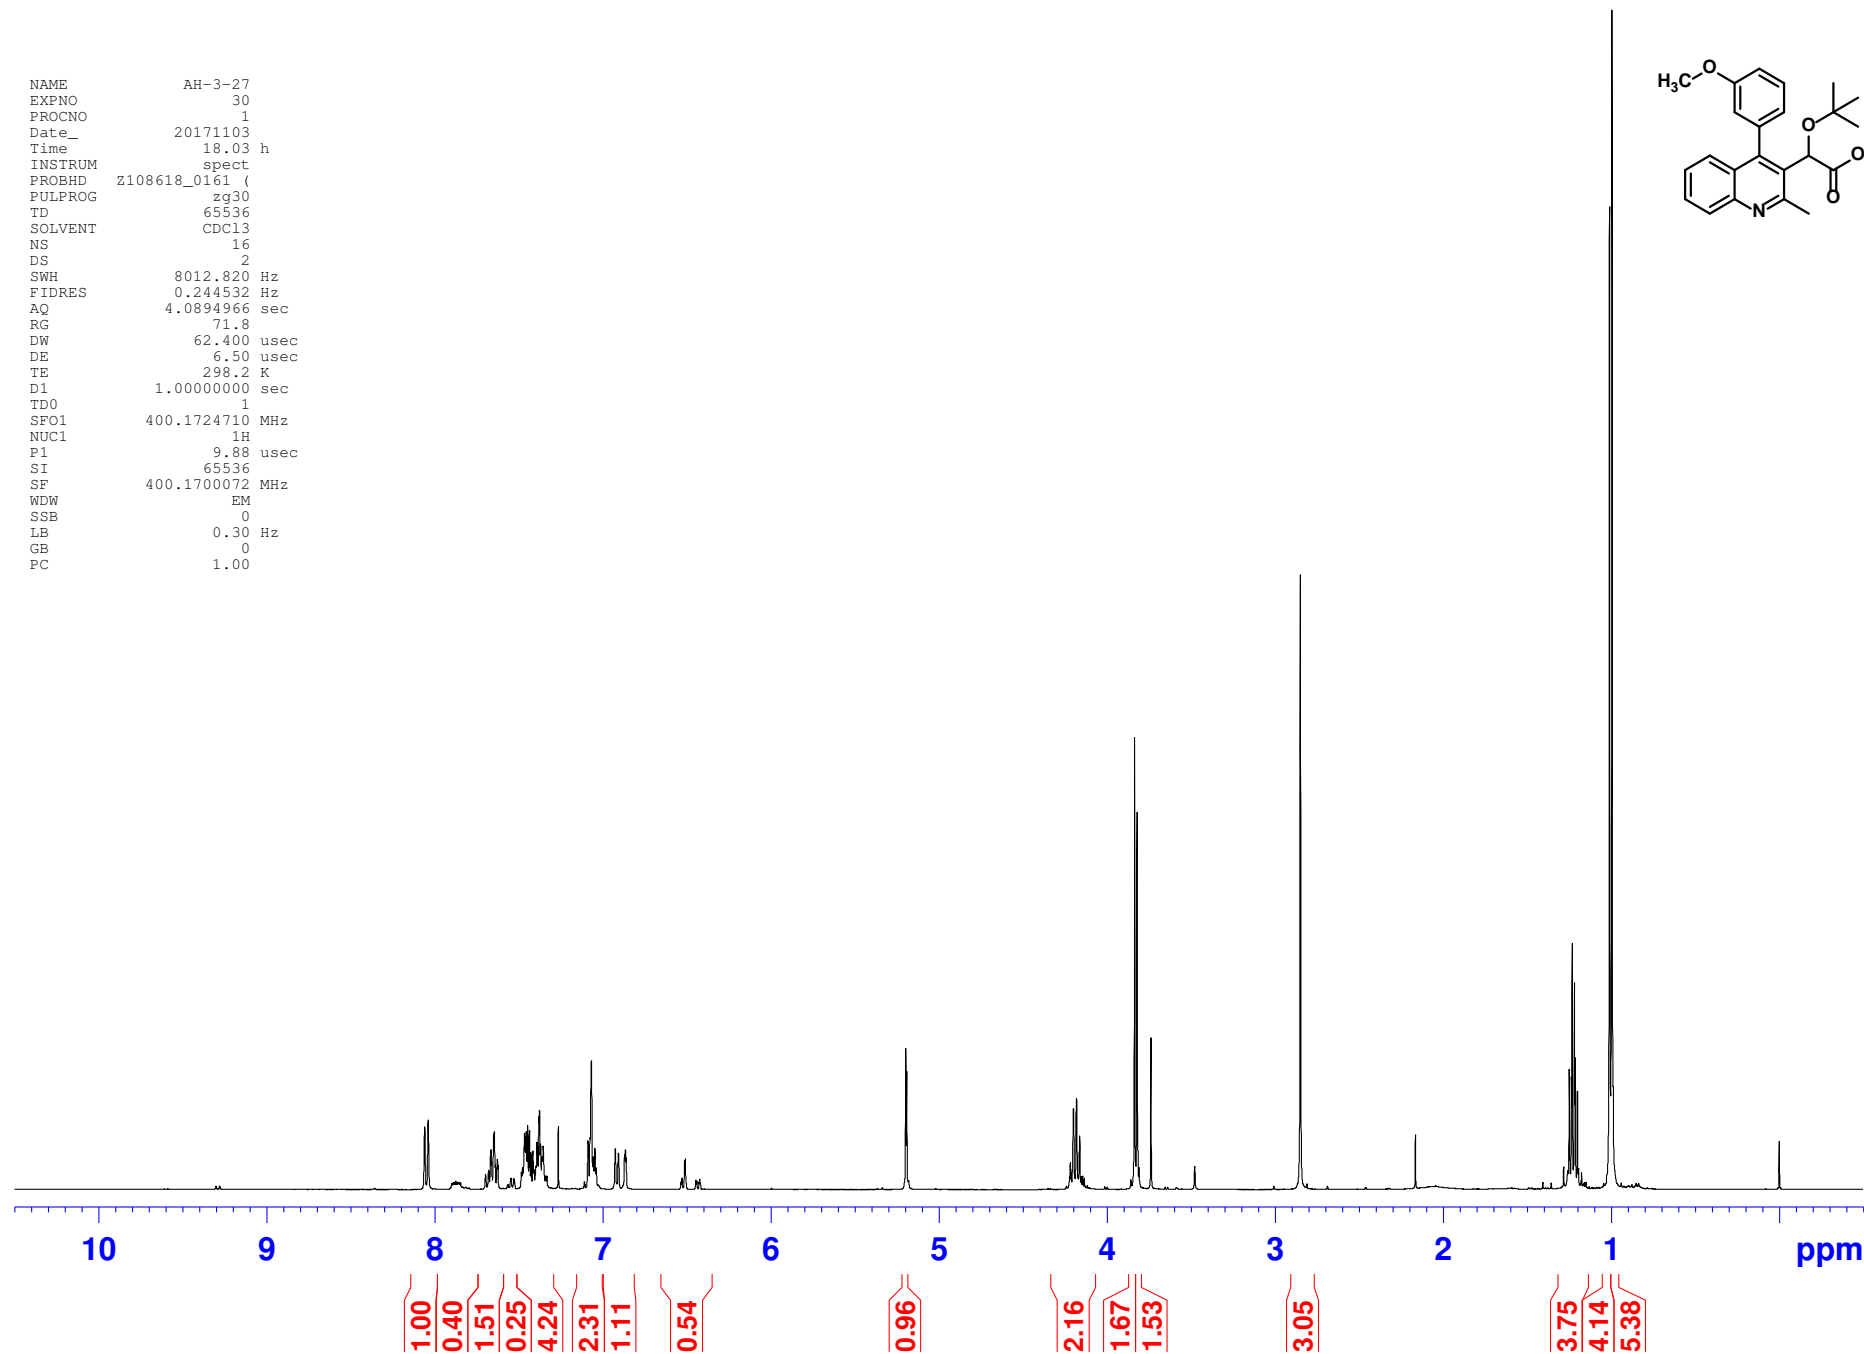

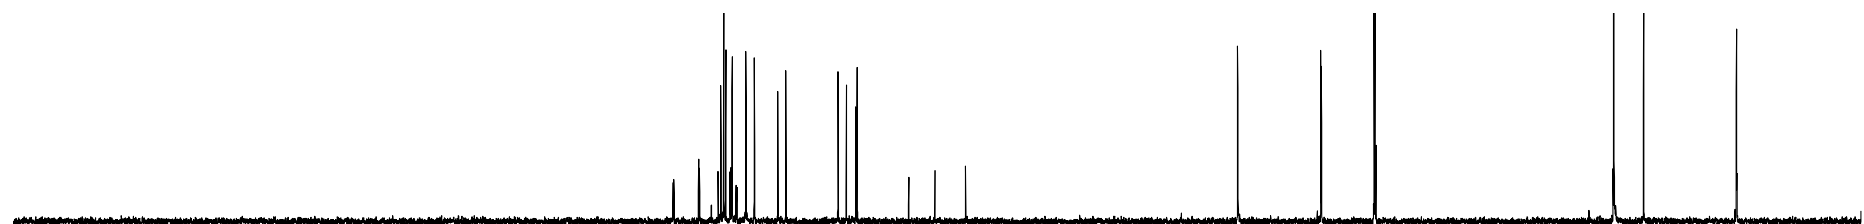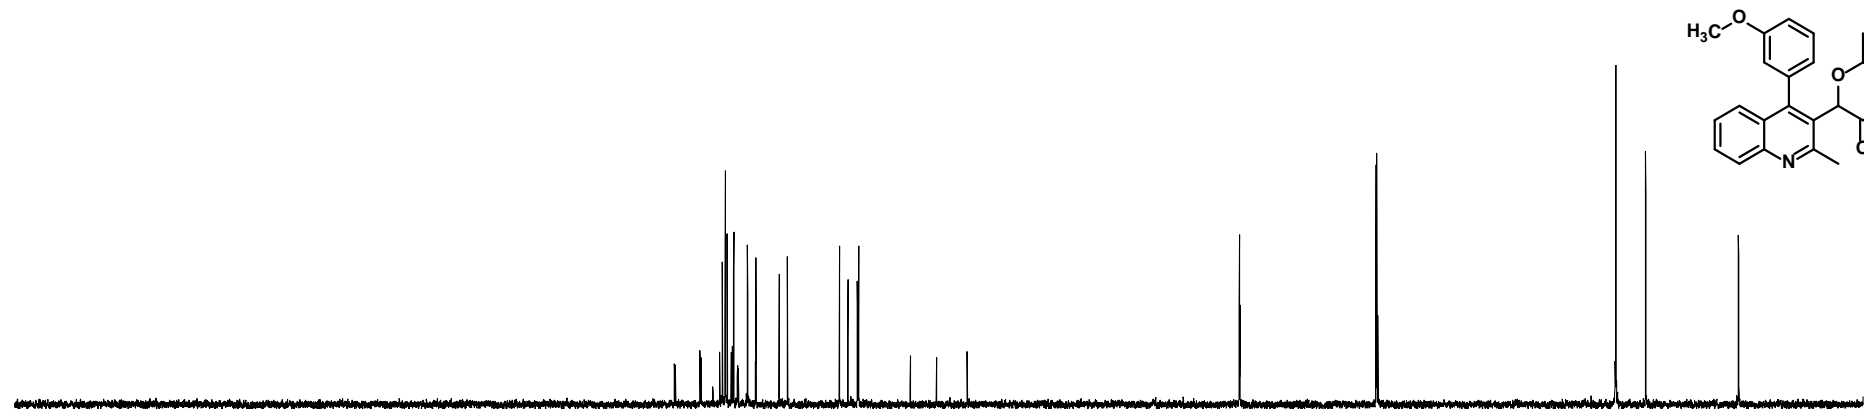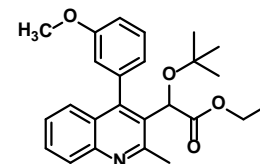

- 172.62
- 172.57
- 159.57
- 159.46
- 159.43
- 159.06
- 146.65
- 146.64
- 146.58
- 146.50
- 137.46
- 137.44
- 132.16
- 132.06
- 129.62
- 129.54
- 129.51
- 129.29
- 129.06
- 128.60
- 128.48
- 128.36
- 128.33
- 126.78
- 126.75
- 126.21
- 125.83
- 125.80
- 123.15
- 122.23
- 116.31
- 115.36
- 114.28
- 114.13

- 76.07
- 70.89
- 70.83
- 61.42
- 61.35
- 55.35
- 55.27

- 28.12
- 28.10
- 24.73
- 24.72
- 14.18
- 14.13

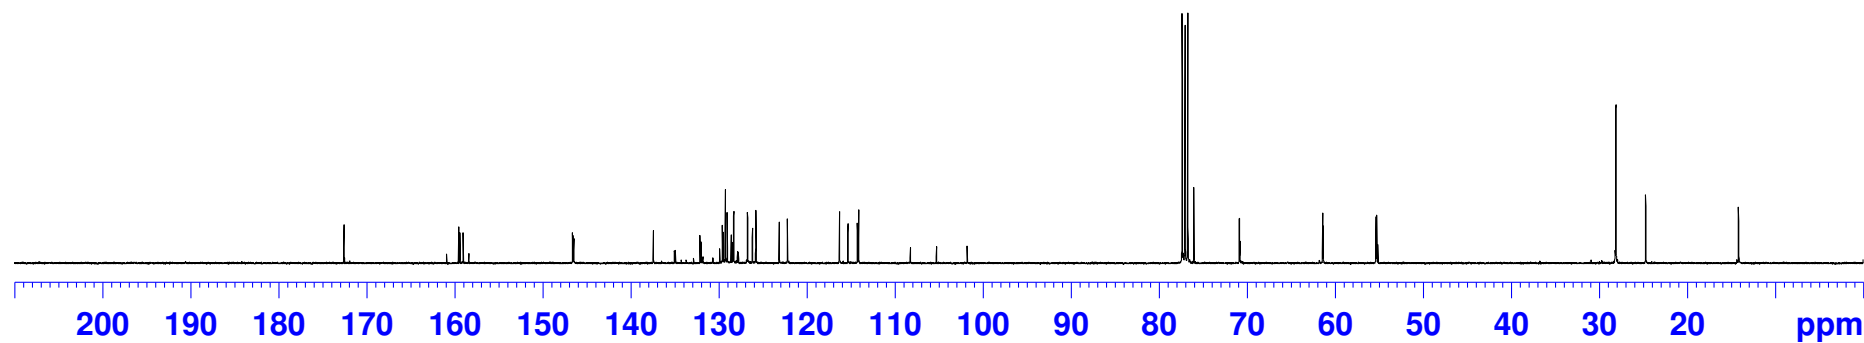

# AH-3-60 Characterization

NAME AH-3-60  
EXPNO 30  
PROCNO 1  
Date\_ 20171220  
Time 7.39 h  
INSTRUM spect  
PROBHD z108618\_0161 (  
PULPROG zg30  
TD 65536  
SOLVENT CDC13  
NS 16  
DS 2  
SWH 8012.820 Hz  
FIDRES 0.244532 Hz  
AQ 4.0894966 sec  
RG 90.5  
DW 62.400 usec  
DE 6.50 usec  
TE 298.2 K  
D1 1.00000000 sec  
TDO 1  
SFO1 400.1724710 MHz  
NUC1 1H  
P1 9.88 usec  
SI 65536  
SF 400.1700074 MHz  
WDW EM  
SSB 0  
LB 0.30 Hz  
GB 0  
PC 1.00

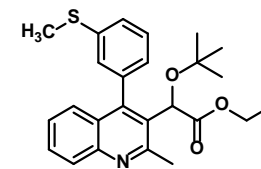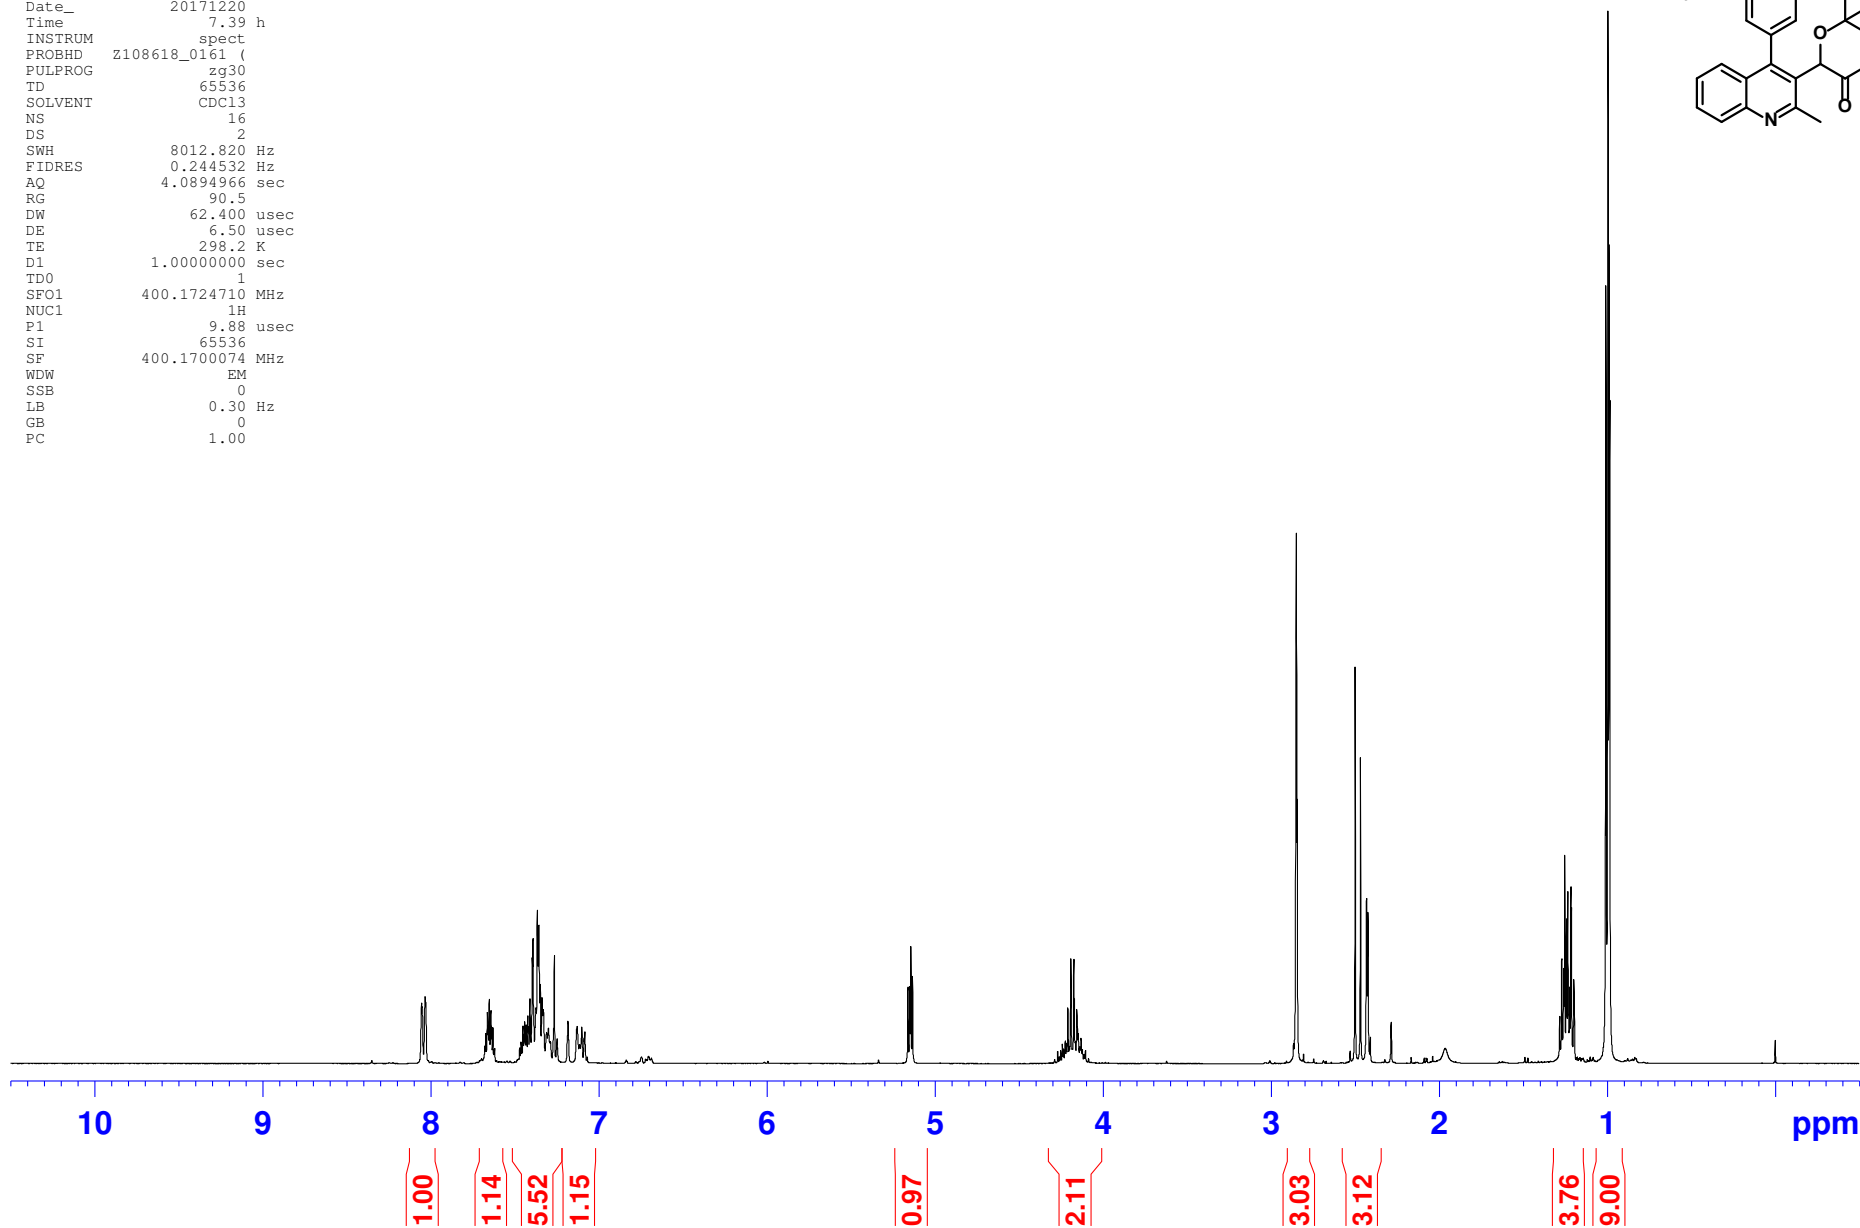

# AH-3-60 Characterization

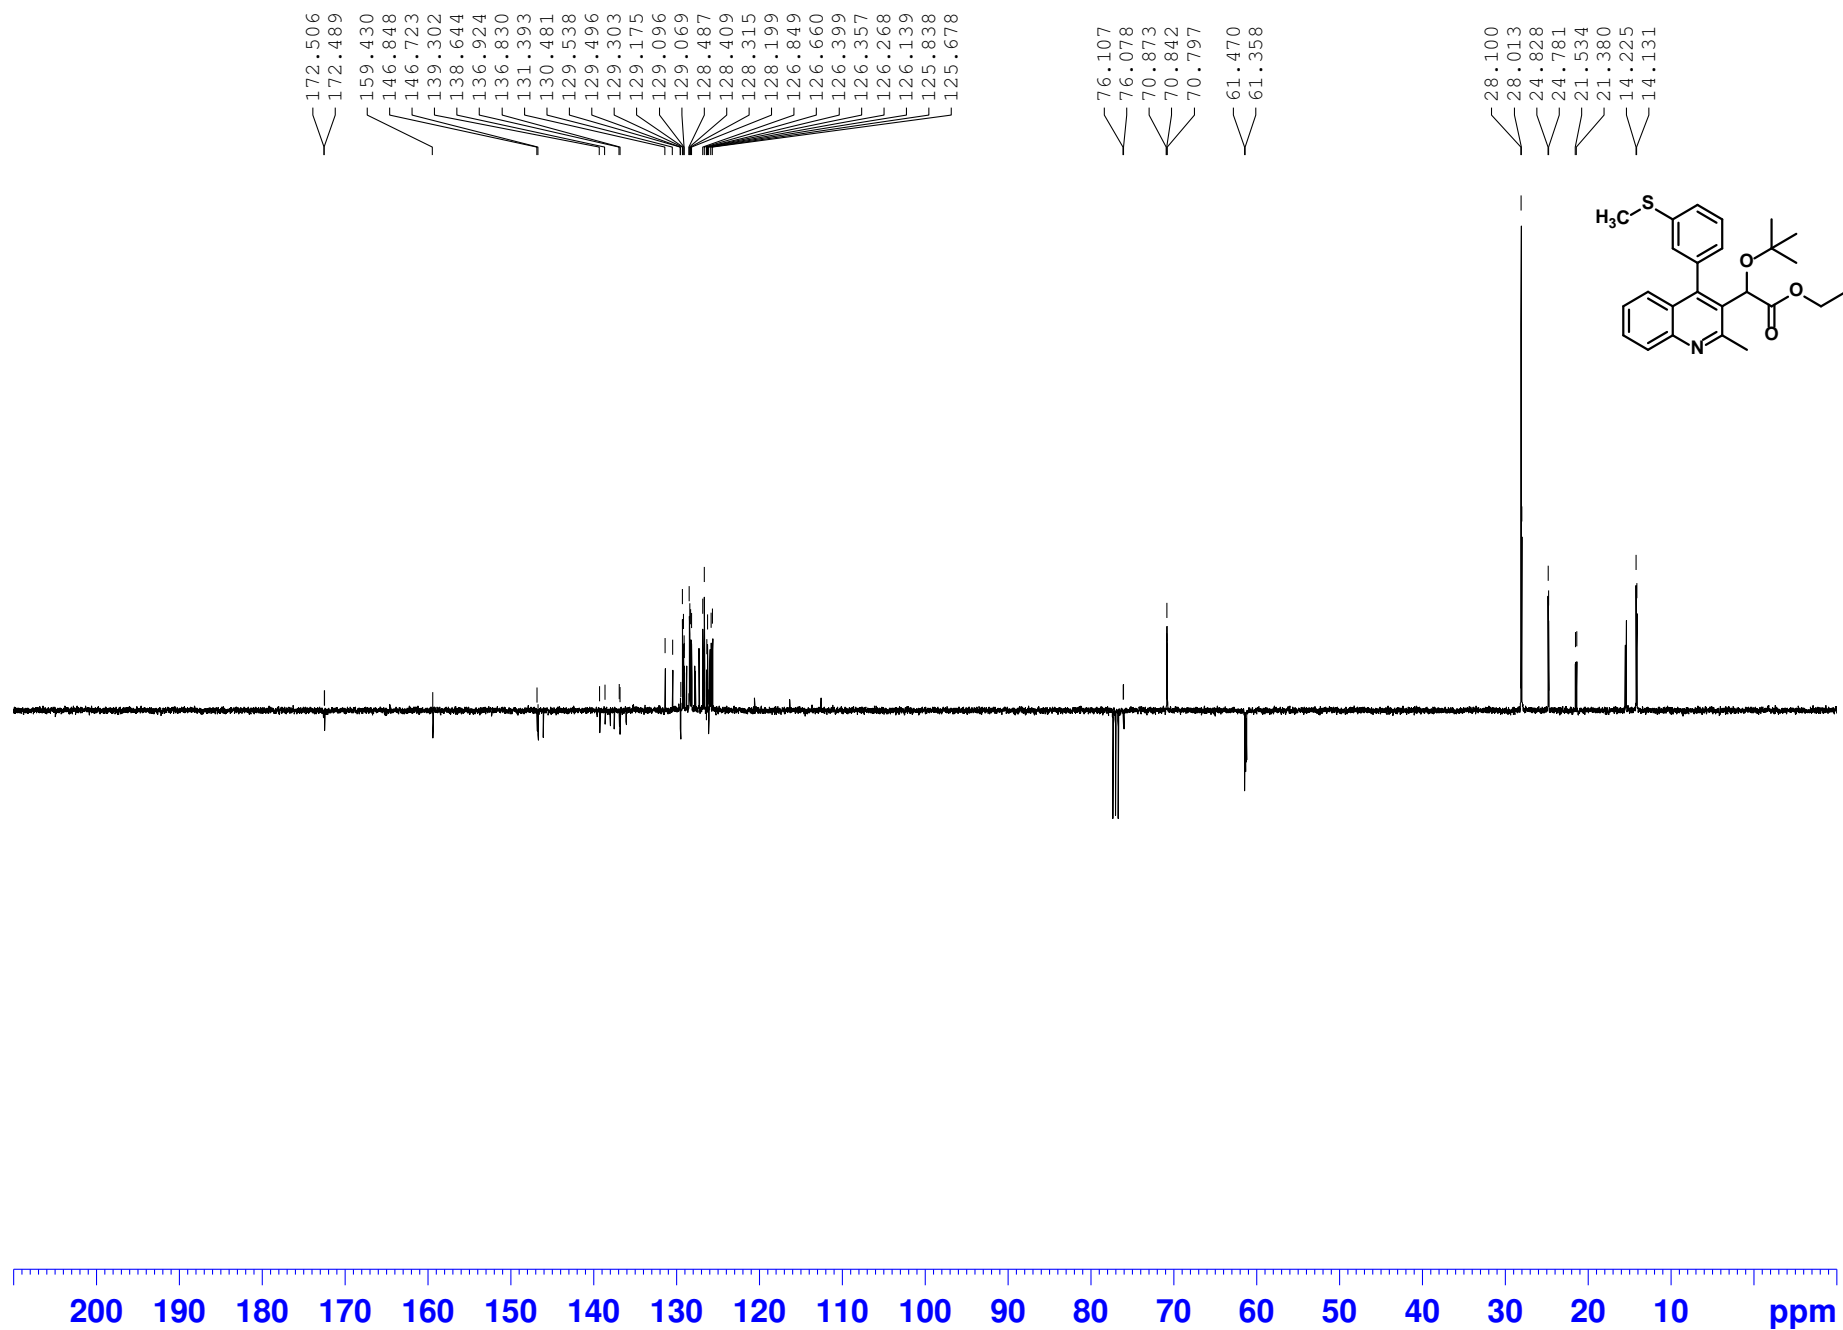

# AH-3-41 Characterization

MISSISS

NAME AH-3-41  
EXPNO 16  
PROCNO 1  
Date\_ 20171104  
Time 12.27 h  
INSTRUM spect  
PROBHD z108618\_0161 (  
PULPROG zg30  
TD 65536  
SOLVENT CDC13  
NS 16  
DS 2  
SWH 8012.820 Hz  
FIDRES 0.244532 Hz  
AQ 4.0894966 sec  
RG 80.6  
DW 62.400 usec  
DE 6.50 usec  
TE 298.2 K  
D1 1.00000000 sec  
TDO 1  
SFO1 400.1724710 MHz  
NUC1 1H  
P1 9.88 usec  
SI 65536  
SF 400.1700036 MHz  
WDW EM  
SSB 0  
LB 0.30 Hz  
GB 0  
PC 1.00

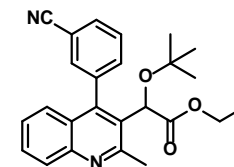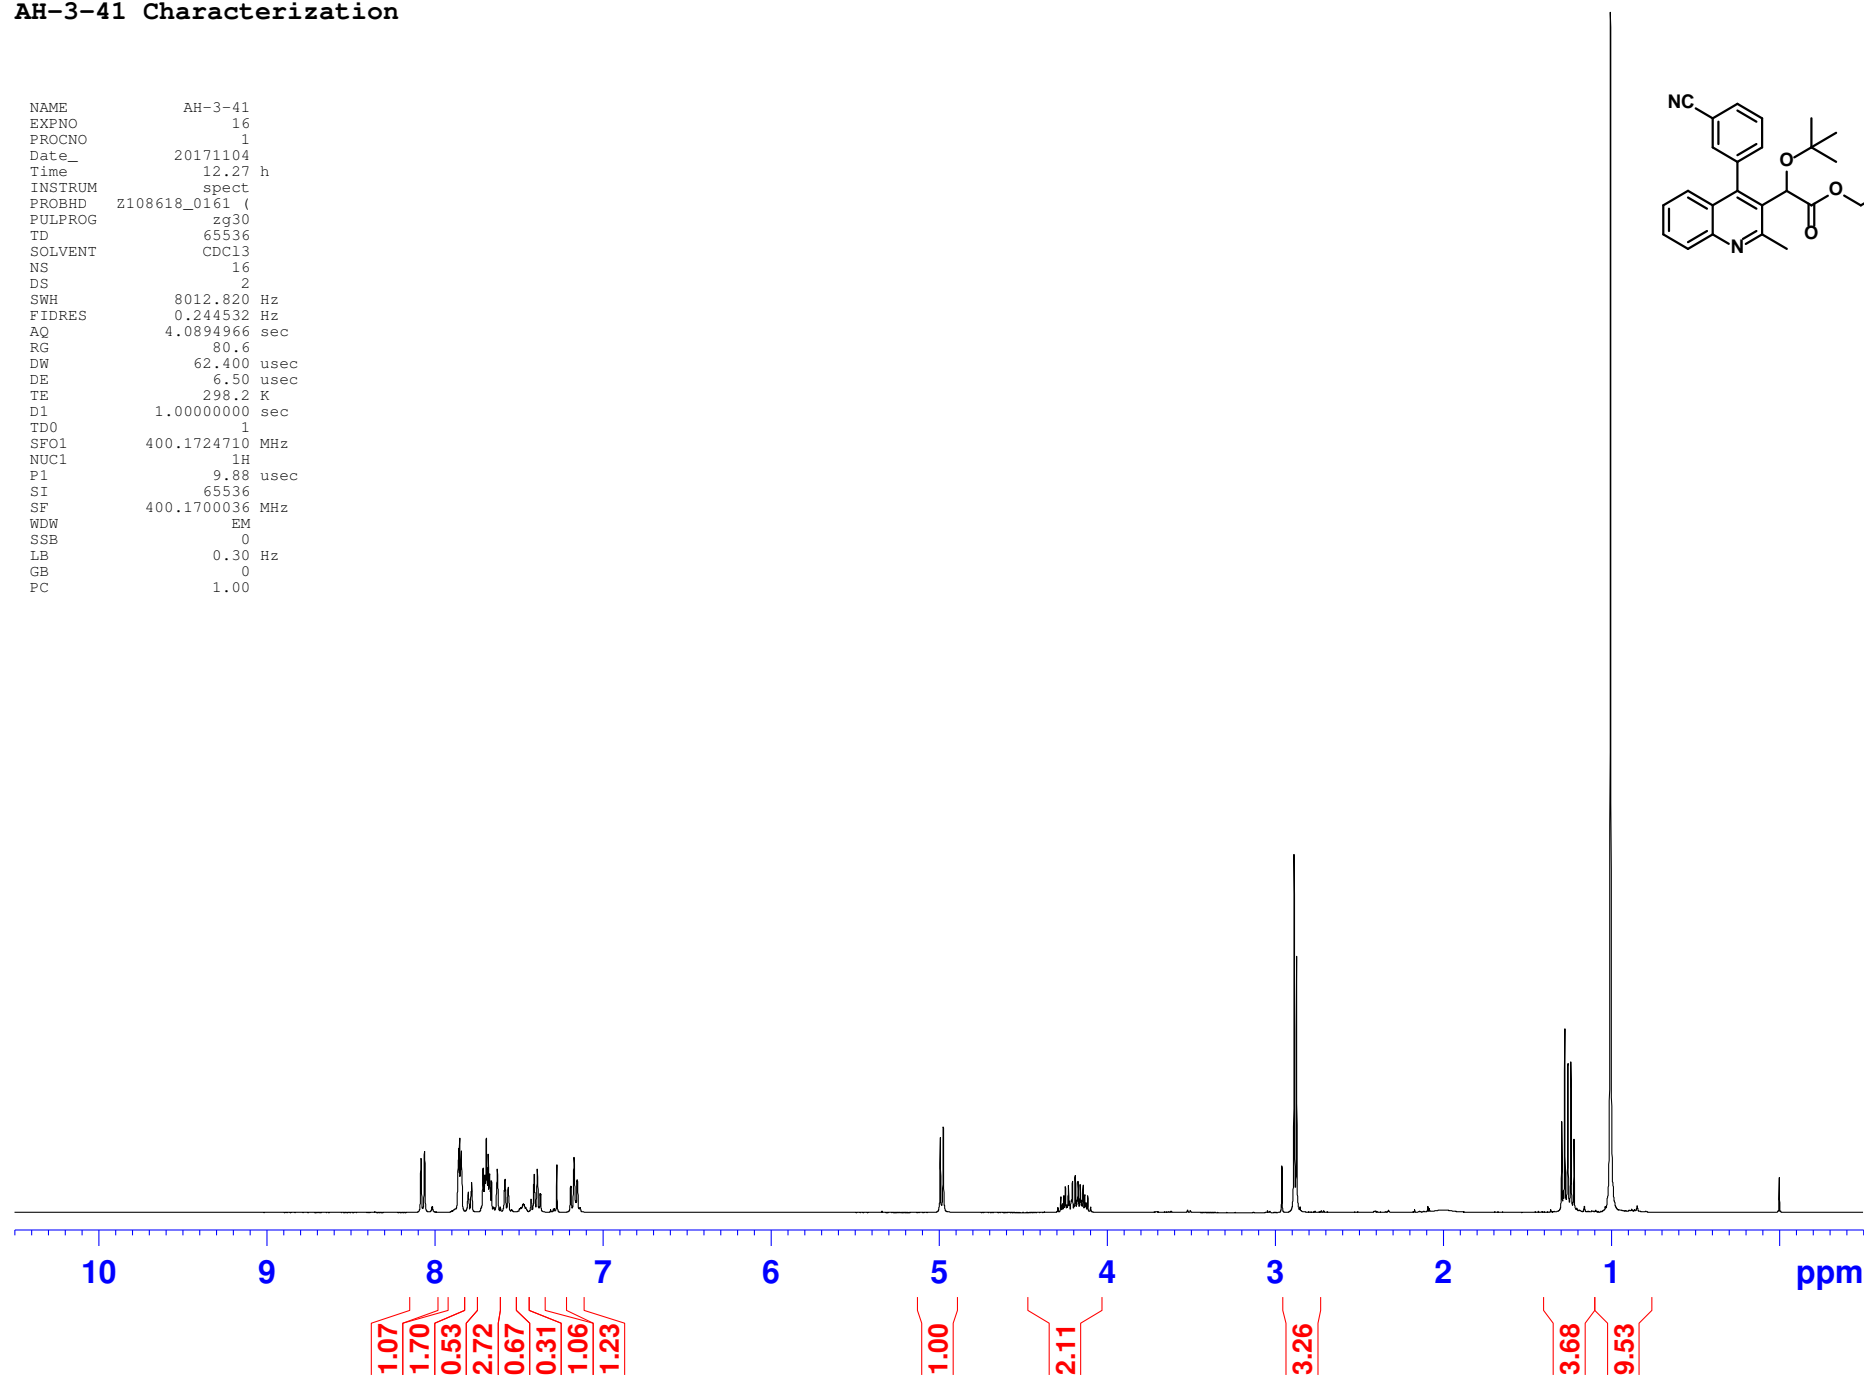

AH-3-41 Characterization

MISSISS

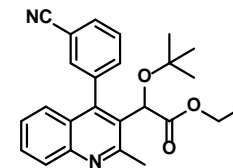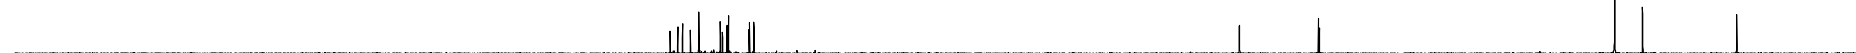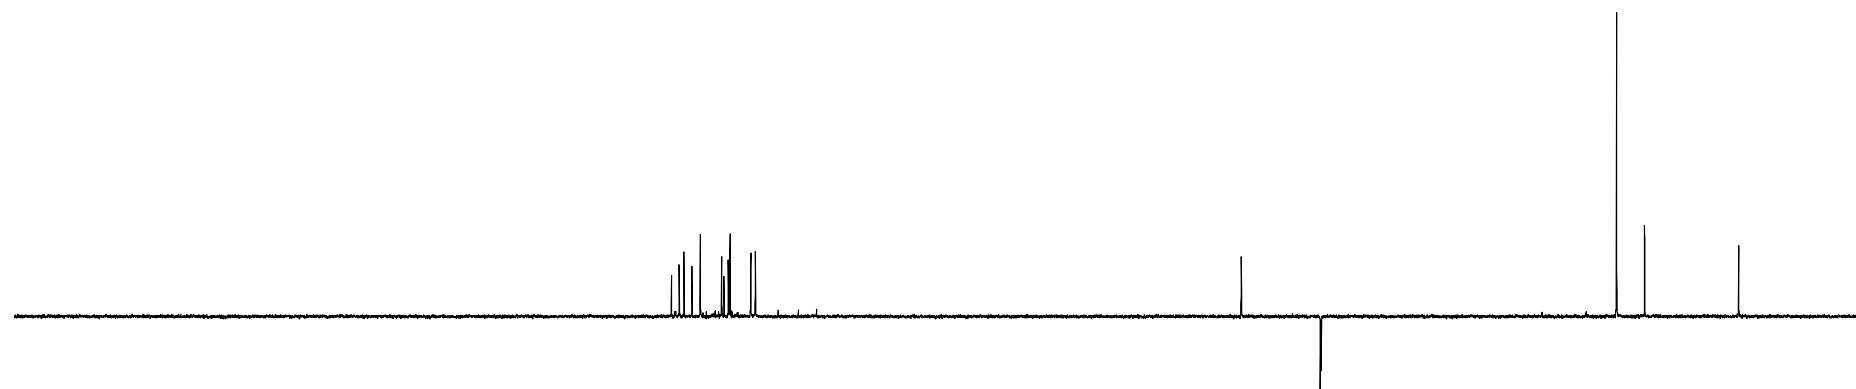

172.14  
171.79  
159.34  
159.26  
146.73  
146.72  
144.04  
143.98  
137.81  
137.78  
135.40  
134.52  
133.98  
133.08  
132.12  
129.70  
129.68  
129.66  
129.58  
129.43  
128.94  
128.75  
126.42  
126.36  
125.88  
125.85  
125.76  
125.69  
118.28  
118.19  
112.91  
112.44

76.26  
76.22  
70.70  
70.66  
61.69  
61.58

28.03  
28.01  
24.85  
24.81

14.15  
14.14

200 190 180 170 160 150 140 130 120 110 100 90 80 70 60 50 40 30 20 ppm

KM-1-65B1

MISSISS

NAME KM-1-65  
EXPNO 20  
PROCNO 1  
Date\_ 20180128  
Time 20.29 h  
INSTRUM spect  
PROBHD z108618\_0161 (  
PULPROG zg30  
TD 65536  
SOLVENT CDC13  
NS 16  
DS 2  
SWH 8012.820 Hz  
FIDRES 0.244532 Hz  
AQ 4.0894966 sec  
RG 32  
DW 62.400 usec  
DE 6.50 usec  
TE 298.4 K  
D1 1.00000000 sec  
TDO 1  
SFO1 400.1724710 MHz  
NUC1 1H  
P1 9.88 usec  
SI 65536  
SF 400.1700111 MHz  
WDW EM  
SSB 0  
LB 0.30 Hz  
GB 0  
PC 1.00

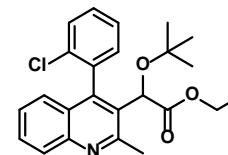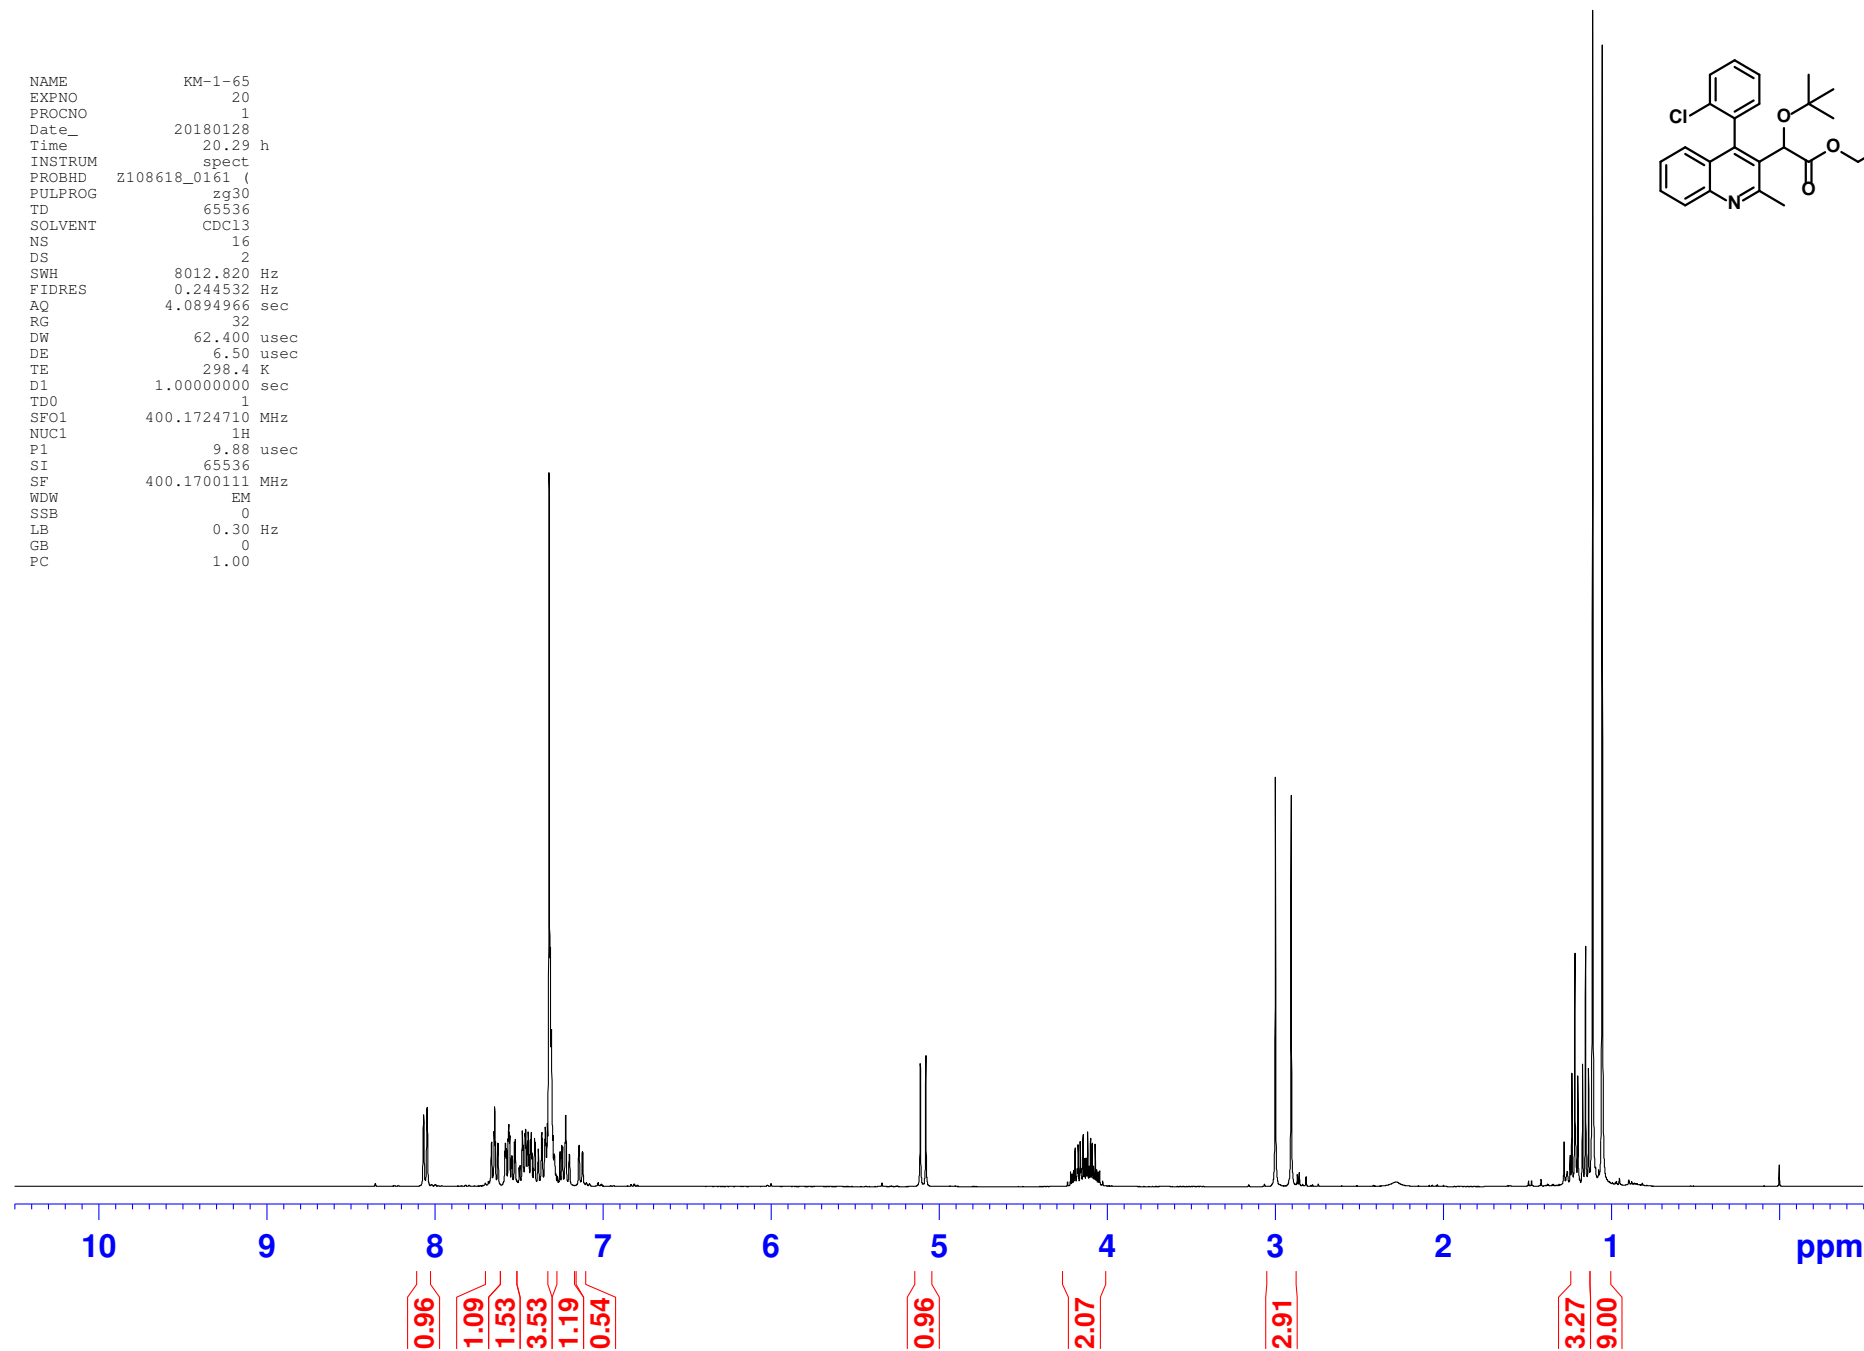

KM-1-65 Characterization

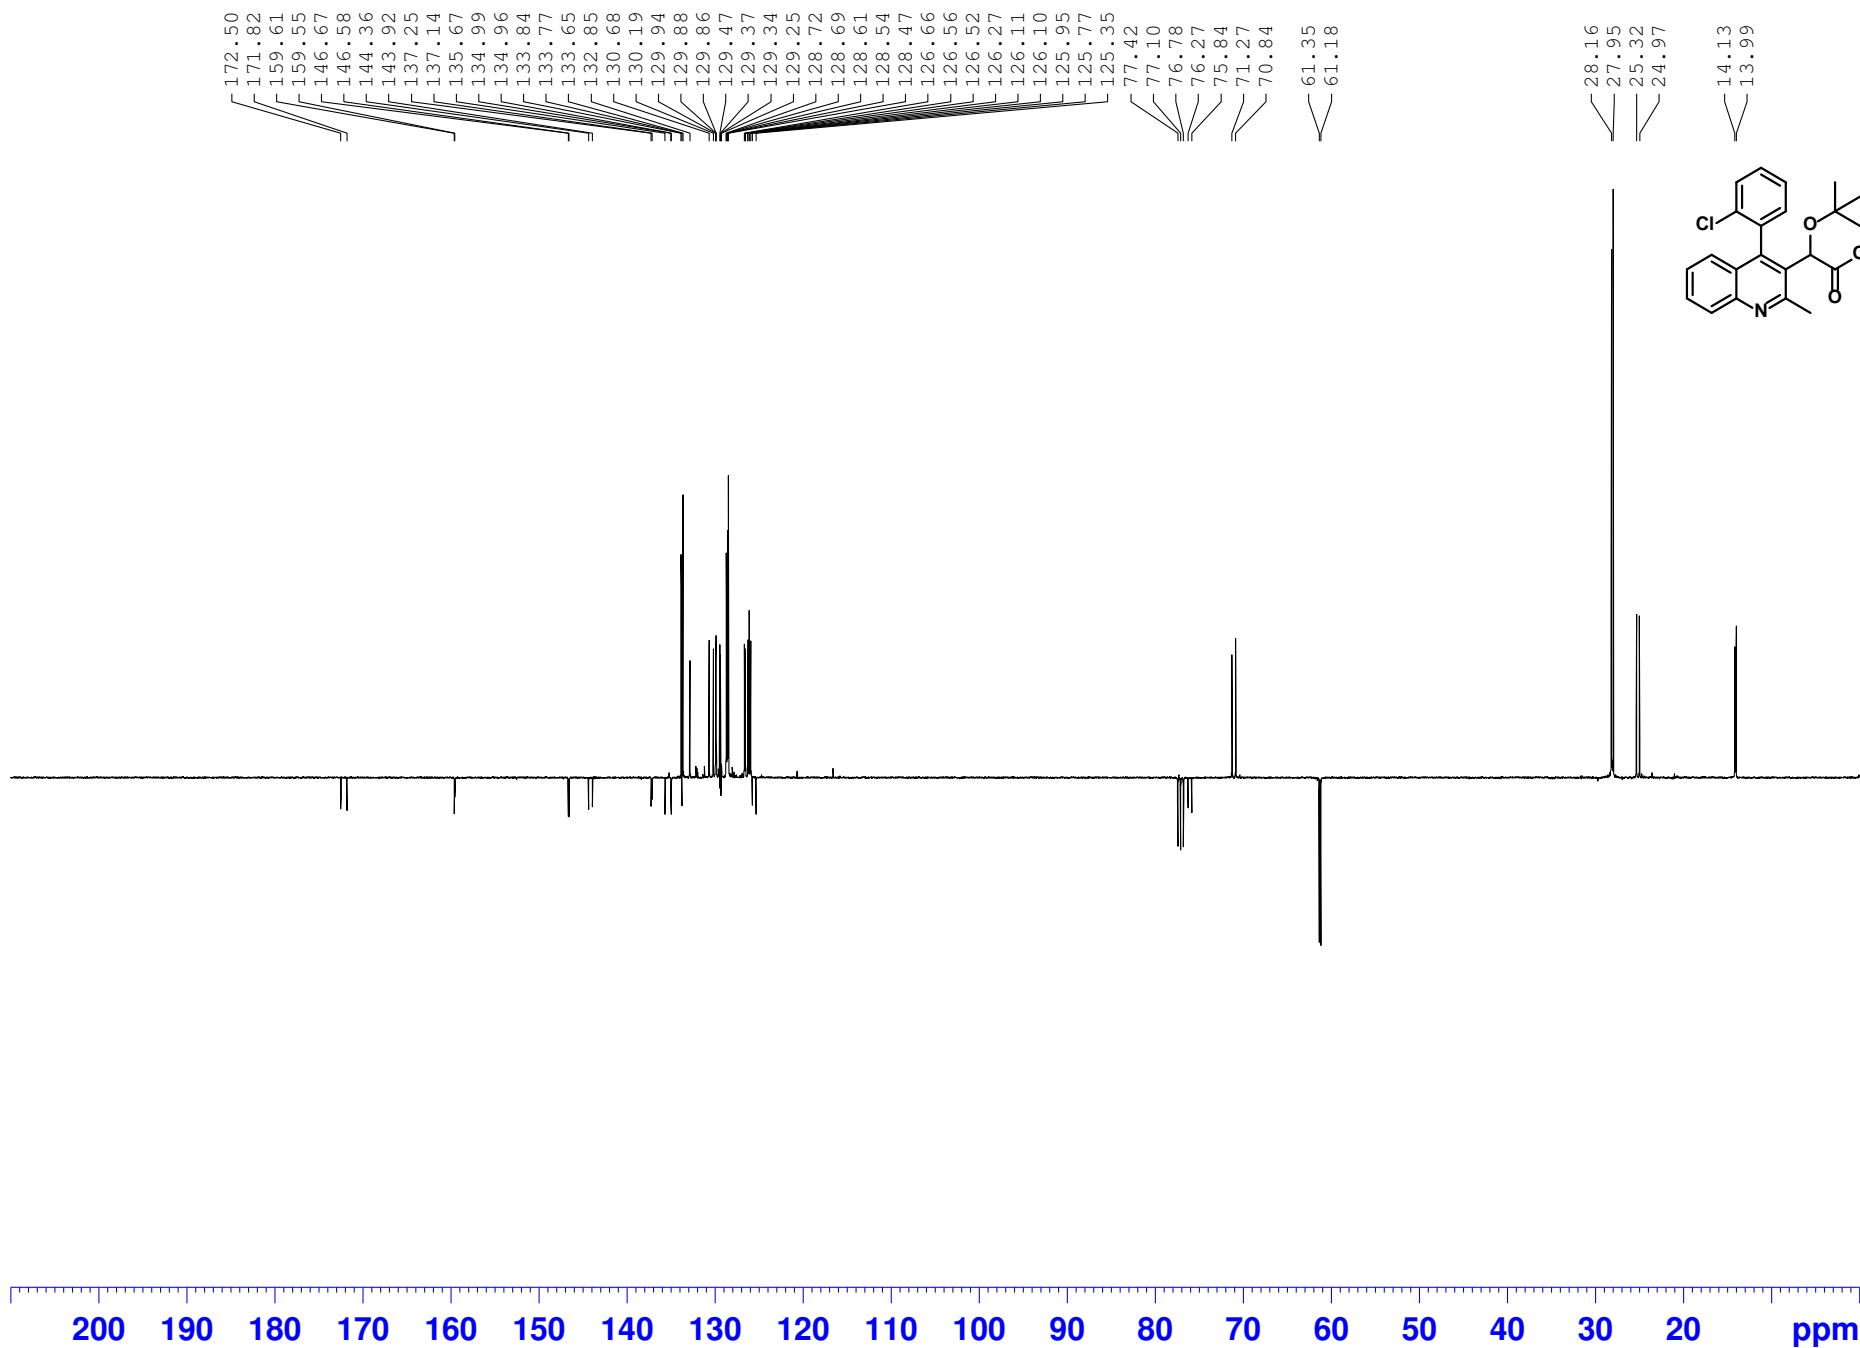



# AH-3-70 Characterization

NAME AH-3-70  
EXPNO 40  
PROCNO 1  
Date\_ 20180128  
Time 12.09 h  
INSTRUM spect  
PROBHD z108618\_0161 (  
PULPROG zg30  
TD 65536  
SOLVENT CDC13  
NS 16  
DS 2  
SWH 8012.820 Hz  
FIDRES 0.244532 Hz  
AQ 4.0894966 sec  
RG 71.8  
DW 62.400 usec  
DE 6.50 usec  
TE 298.1 K  
D1 1.00000000 sec  
TDO 1  
SFO1 400.1724710 MHz  
NUC1 1H  
P1 9.88 usec  
SI 65536  
SF 400.1700064 MHz  
WDW EM  
SSB 0  
LB 0.30 Hz  
GB 0  
PC 1.00

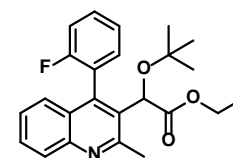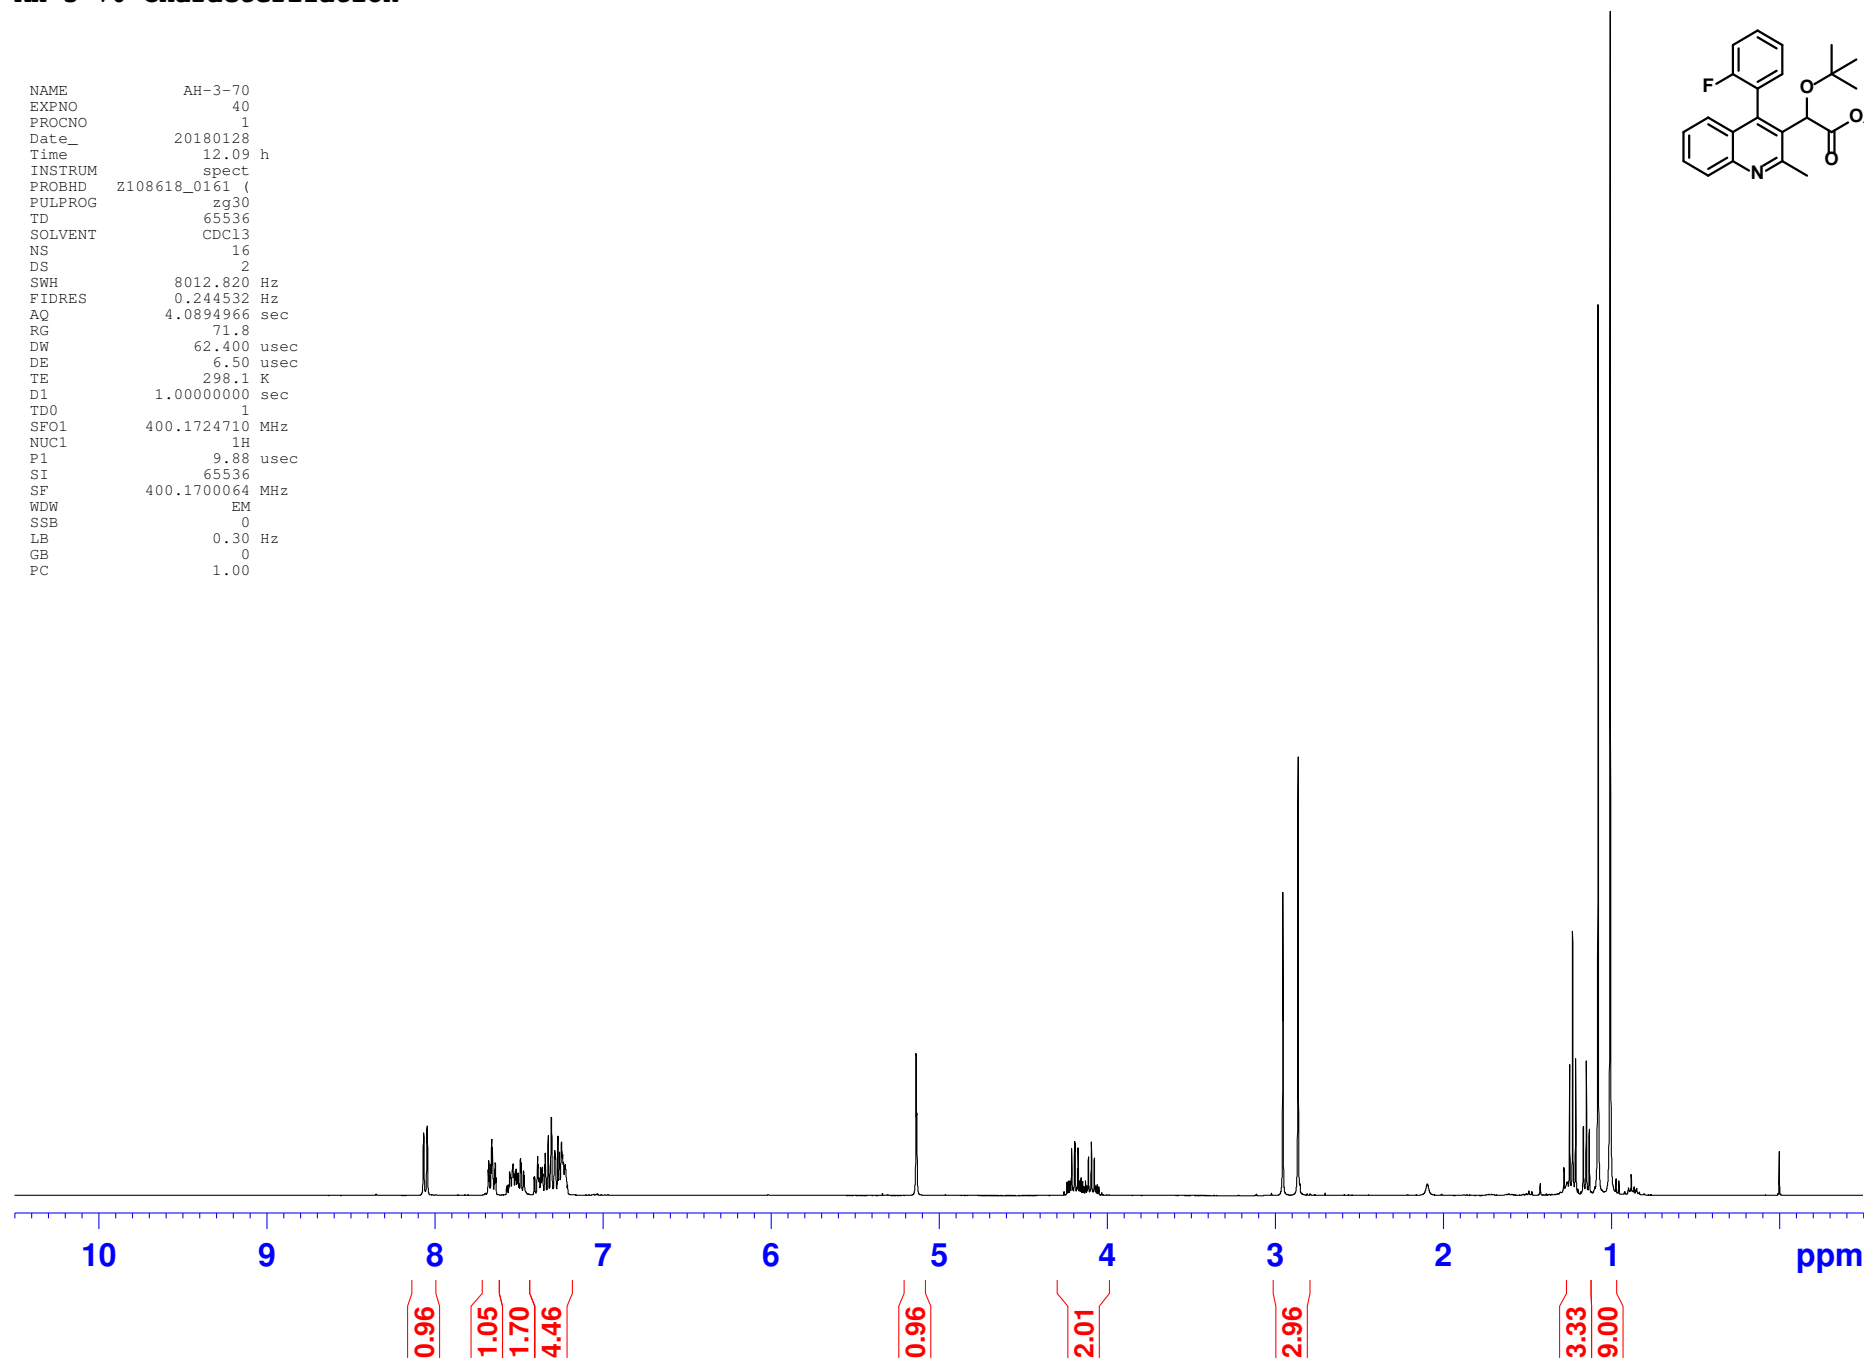

AH-3-70 Characterization

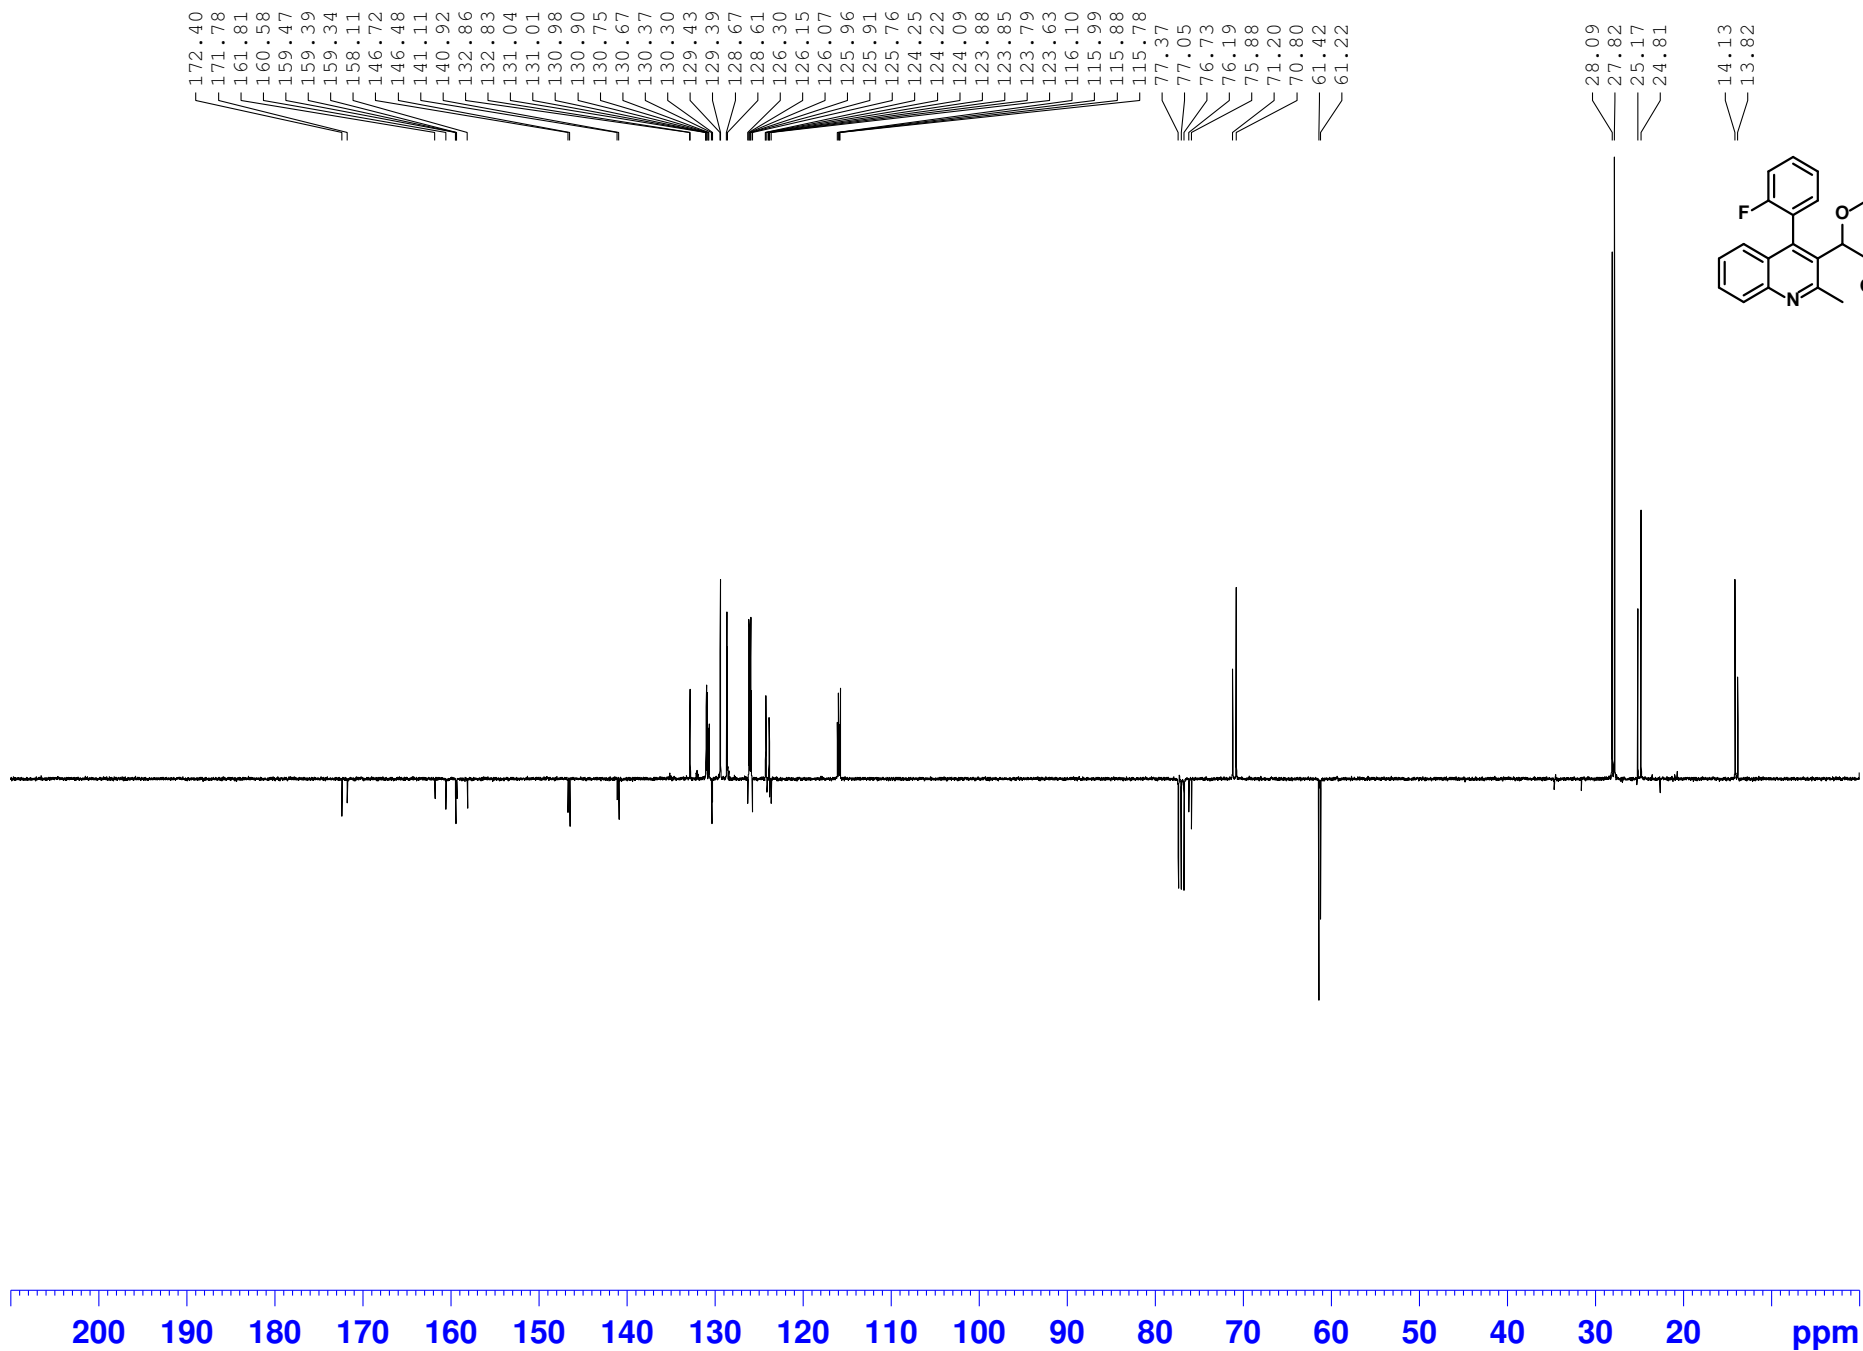

# AH-3-64B Characterization

NAME AH-3-64  
EXPNO 20  
PROCNO 1  
Date\_ 20180111  
Time 17.54 h  
INSTRUM spect  
PROBHD z108618\_0161 (  
PULPROG zg30  
TD 65536  
SOLVENT CDC13  
NS 16  
DS 2  
SWH 8012.820 Hz  
FIDRES 0.244532 Hz  
AQ 4.0894966 sec  
RG 32  
DW 62.400 usec  
DE 6.50 usec  
TE 298.2 K  
D1 1.00000000 sec  
TDO 1  
SFO1 400.1724710 MHz  
NUC1 1H  
P1 9.88 usec  
SI 65536  
SF 400.1700091 MHz  
WDW EM  
SSB 0  
LB 0.30 Hz  
GB 0  
PC 1.00

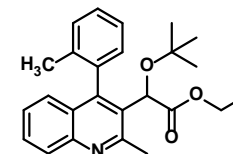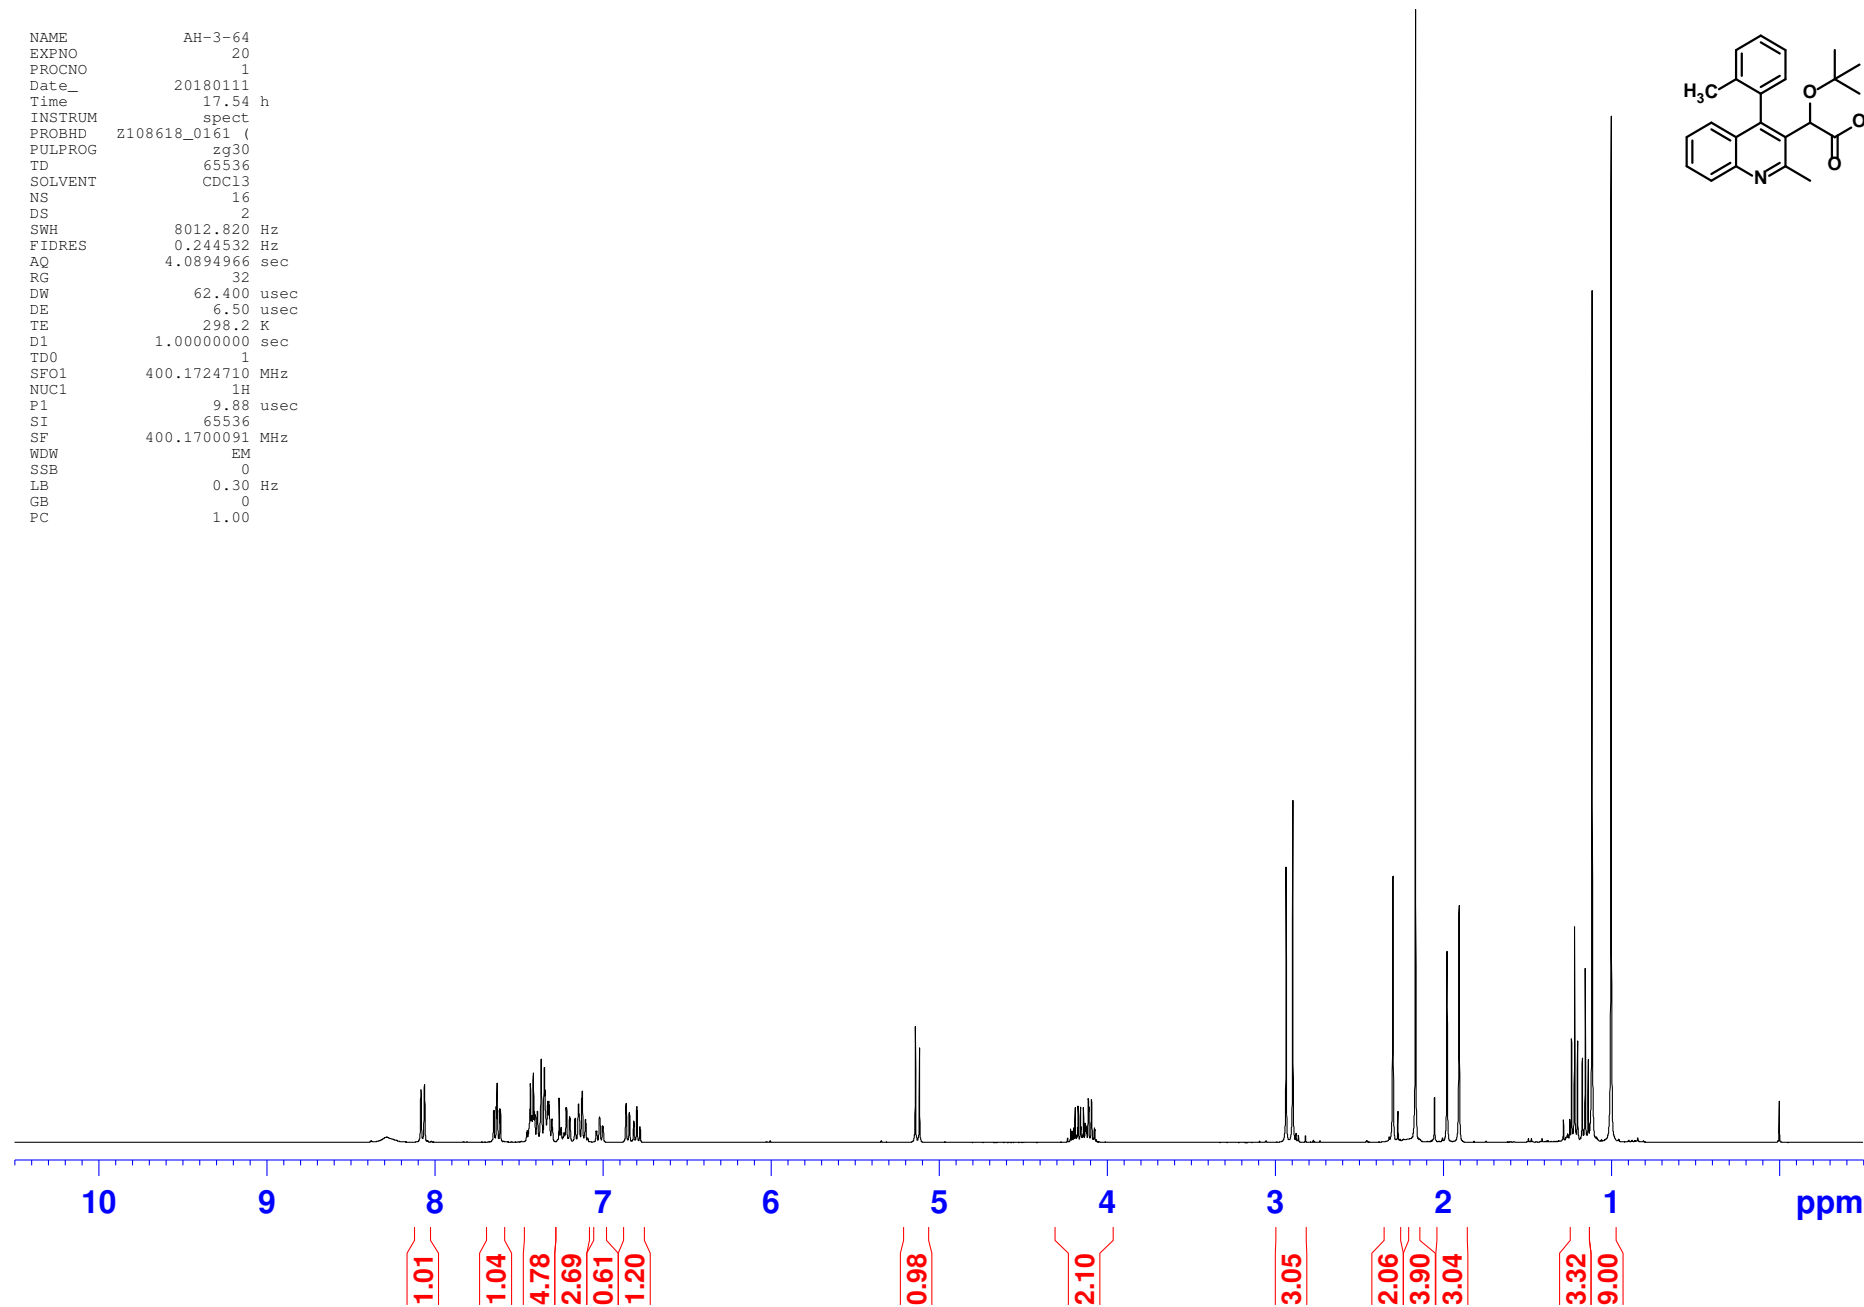

# AH-3-64B Characterization

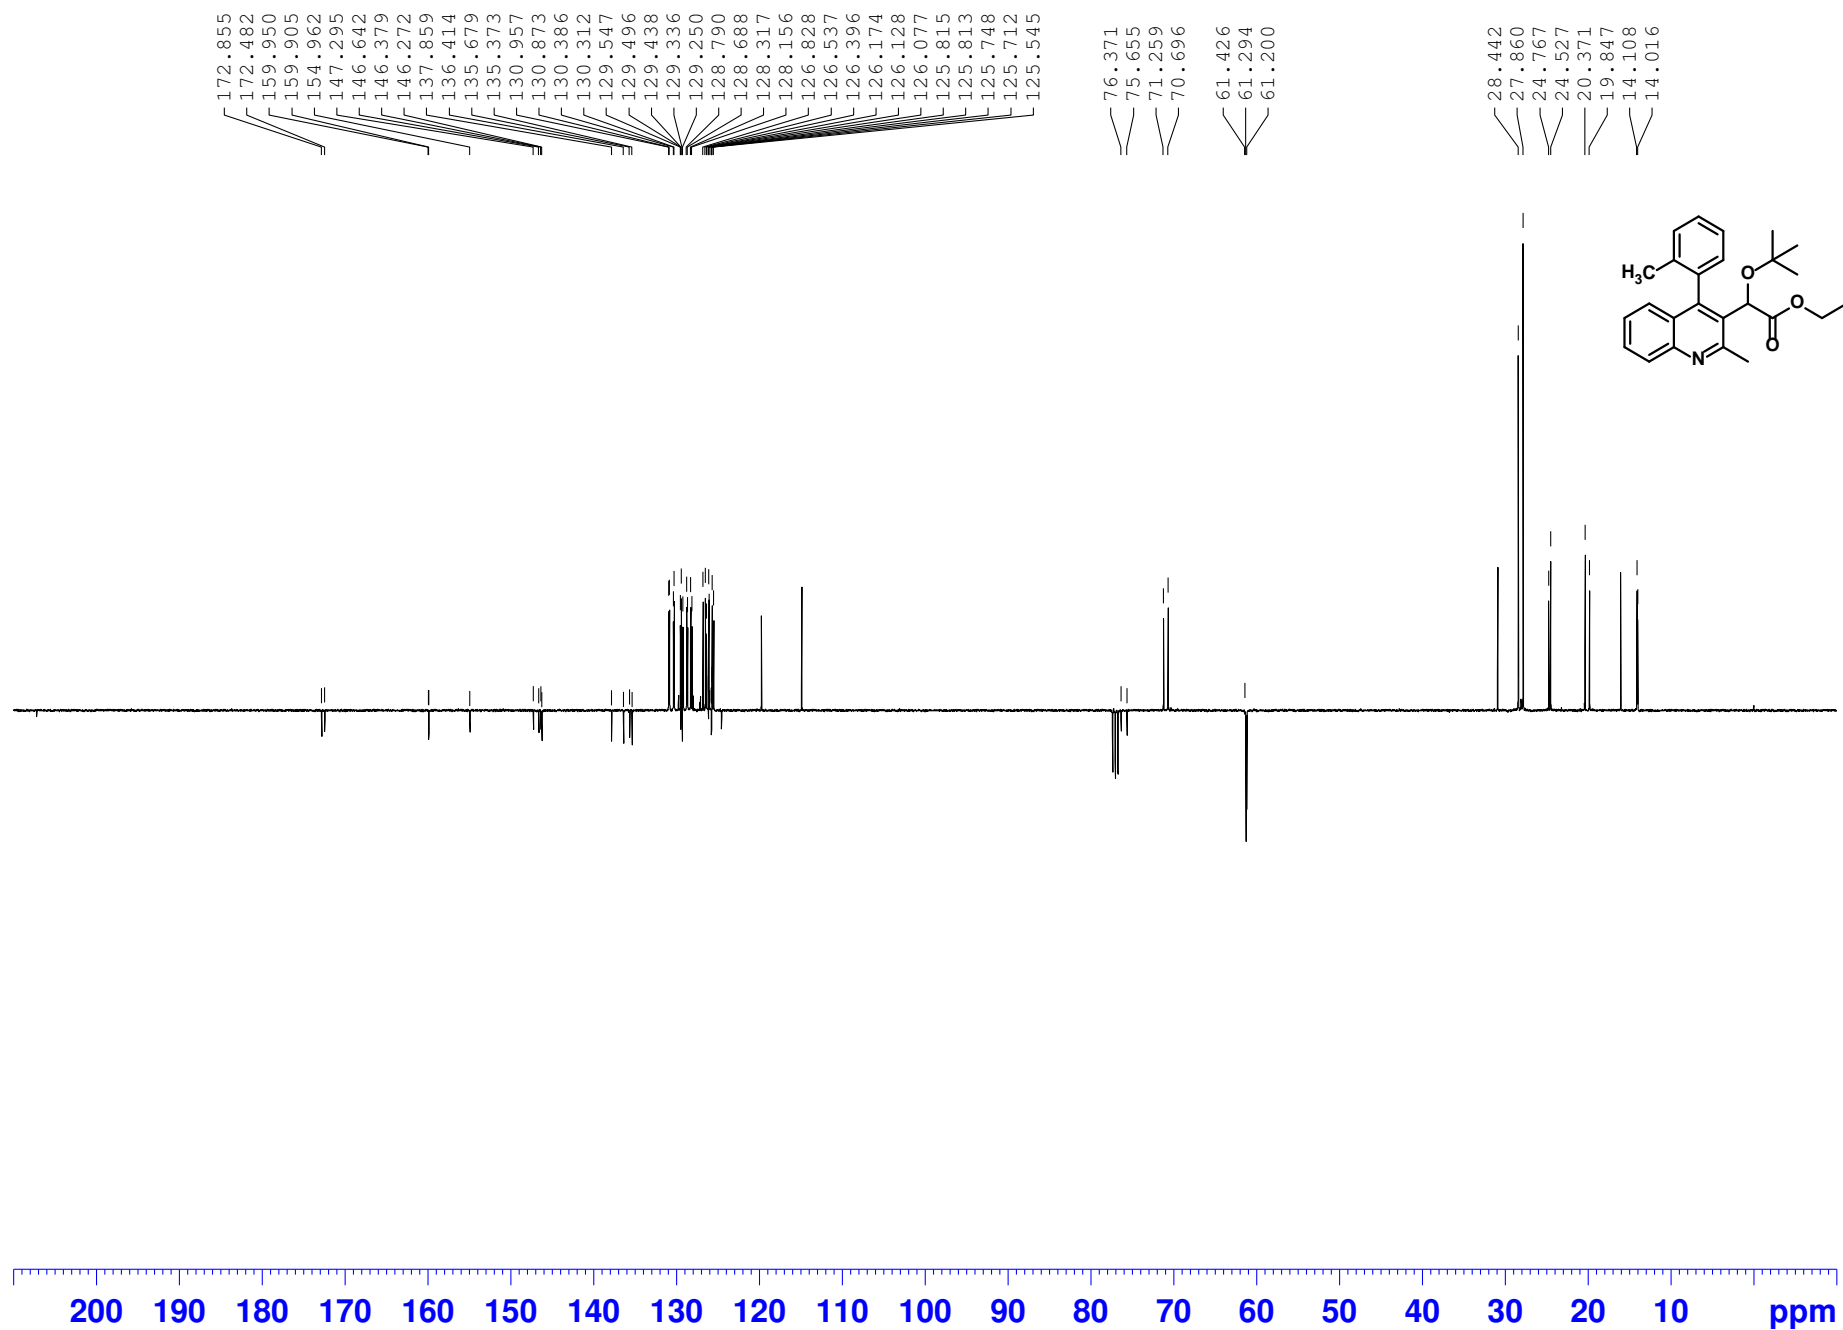

AH-3-66 characterizaion (400MHz, CDC13)

MISSISS

NAME AH-3-66  
EXPNO 50  
PROCNO 1  
Date\_ 20180122  
Time 17.08 h  
INSTRUM spect  
PROBHD z108618\_0161 (  
PULPROG zg30  
TD 65536  
SOLVENT CDC13  
NS 16  
DS 2  
SWH 8012.820 Hz  
FIDRES 0.244532 Hz  
AQ 4.0894966 sec  
RG 32  
DW 62.400 usec  
DE 6.50 usec  
TE 298.3 K  
D1 1.00000000 sec  
TDO 1  
SFO1 400.1724710 MHz  
NUC1 1H  
P1 9.88 usec  
SI 65536  
SF 400.1700074 MHz  
WDW EM  
SSB 0  
LB 0.30 Hz  
GB 0  
PC 1.00

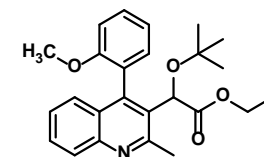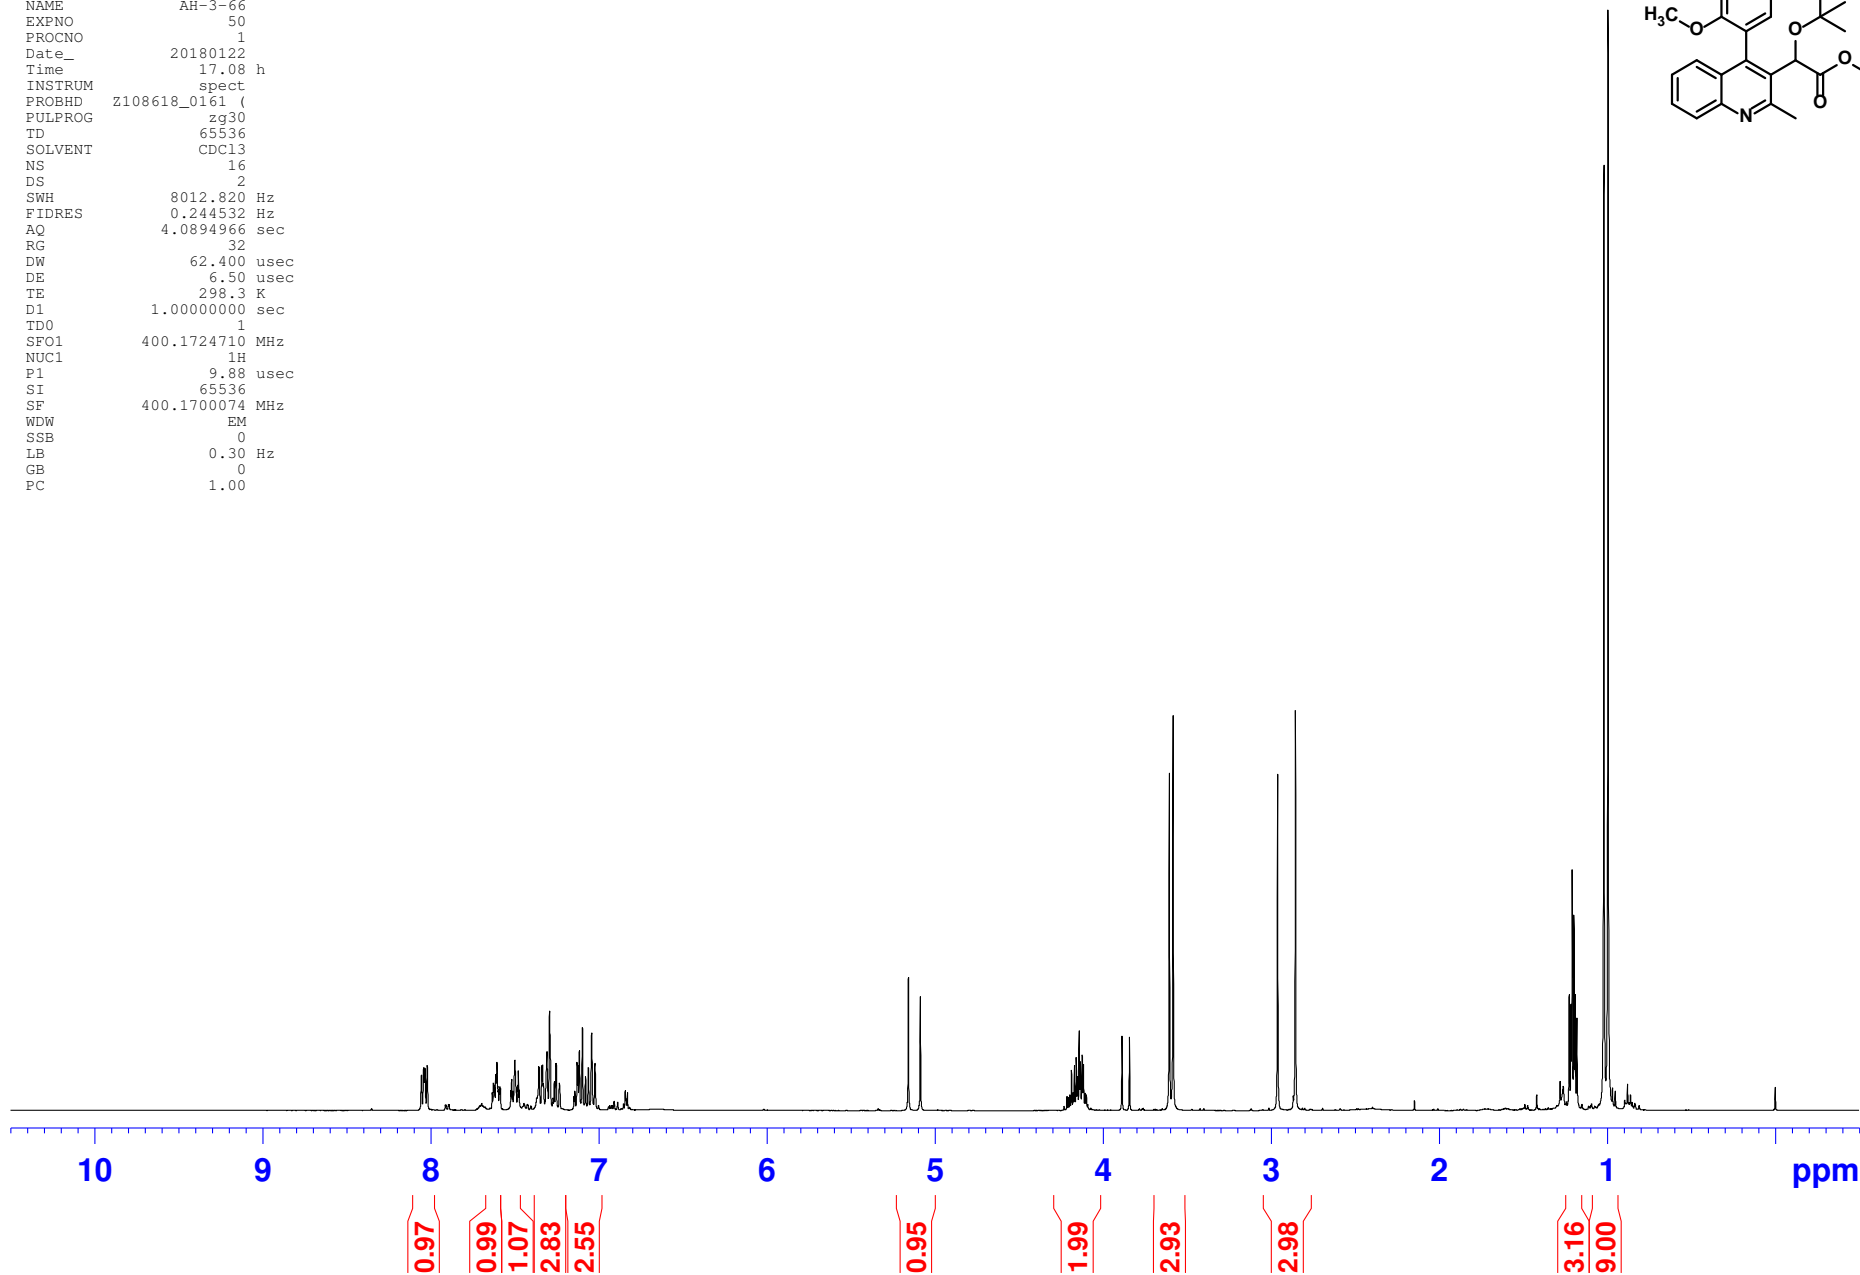

AH-3-66 characterizaion (400MHz, CDC13)

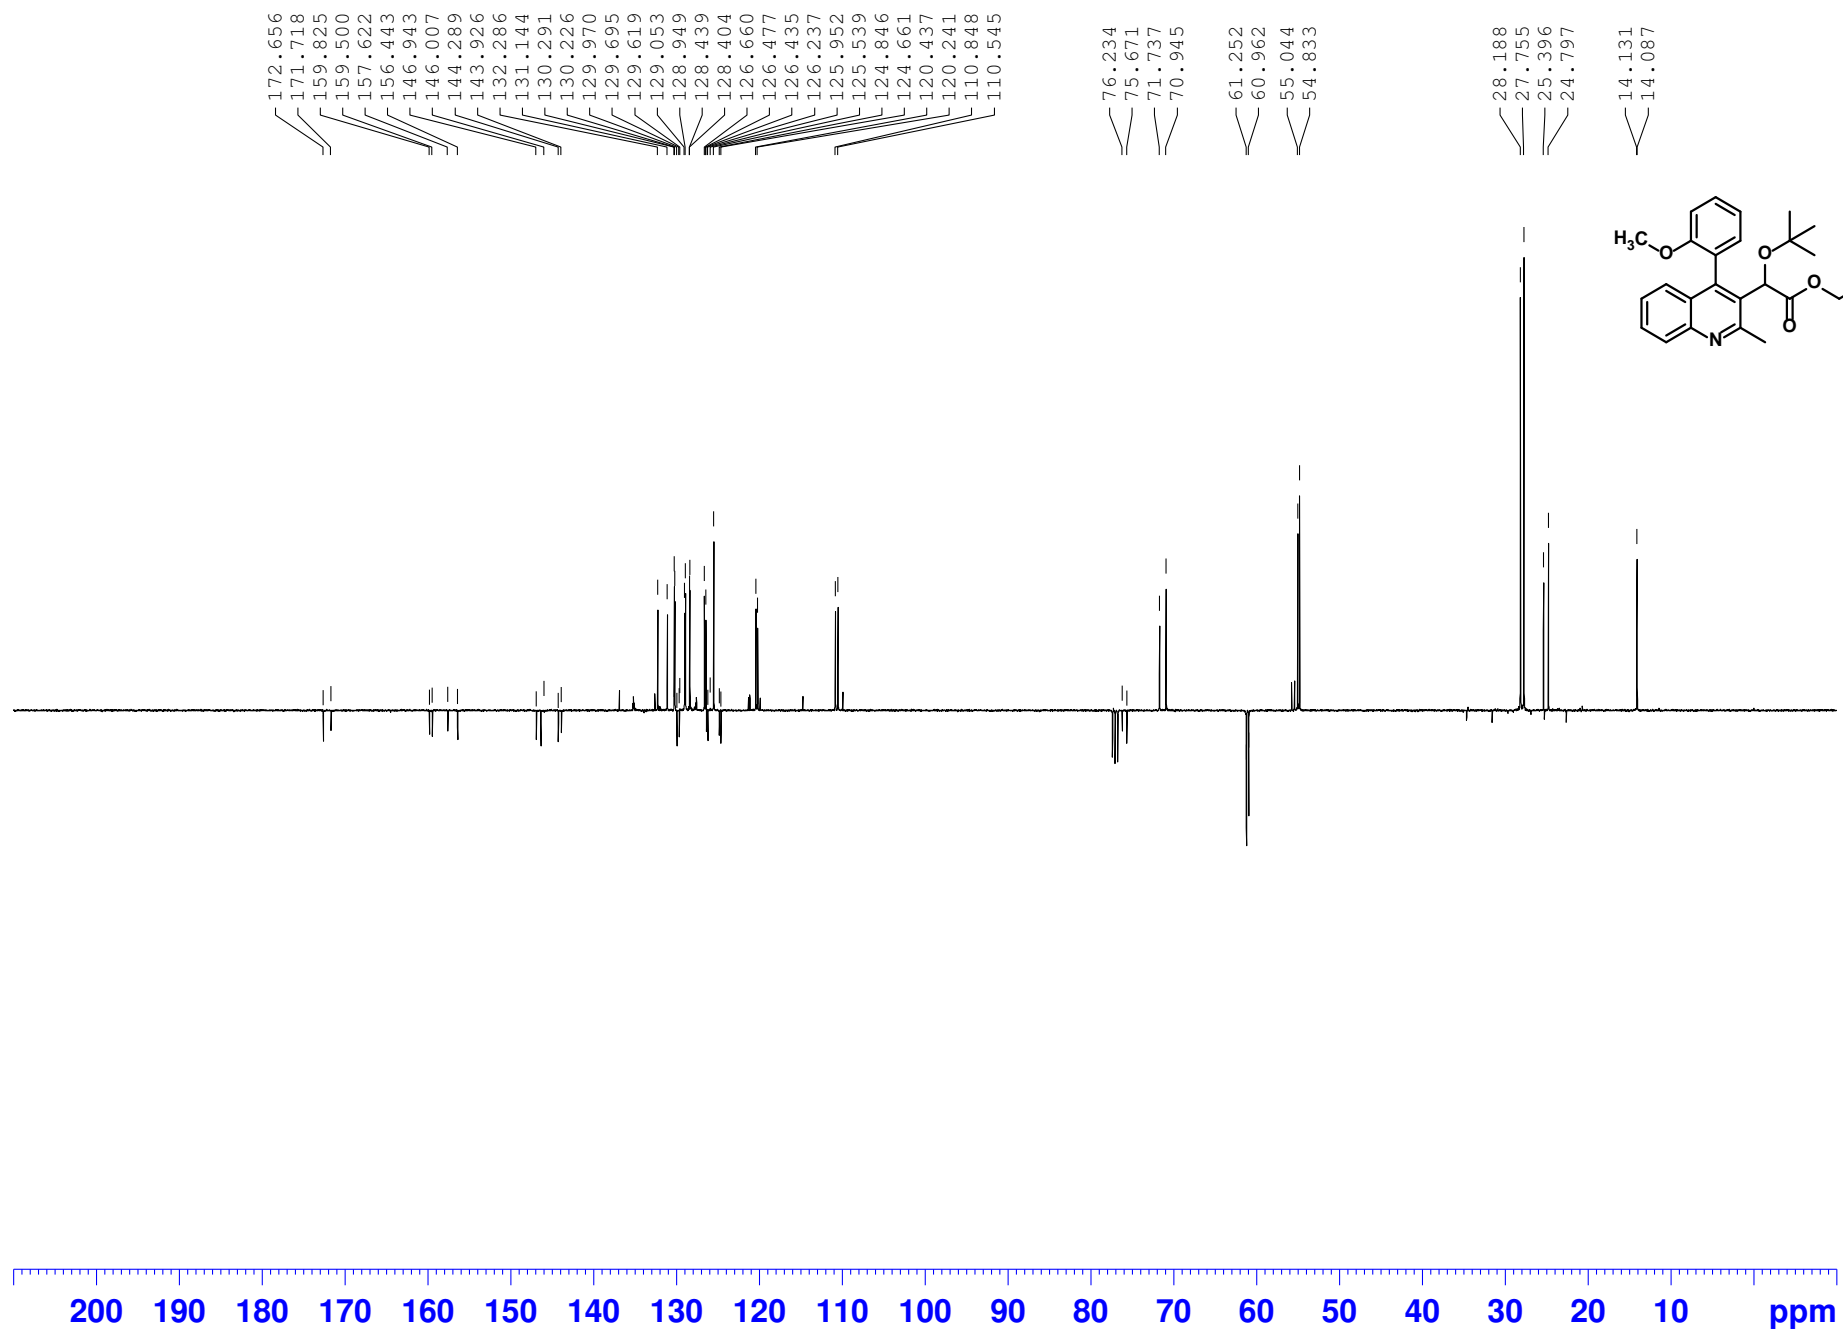

# AH-3-67 Characterization

MISSISS

NAME AH-3-67  
EXPNO 40  
PROCNO 1  
Date\_ 20180122  
Time 11.44 h  
INSTRUM spect  
PROBHD z108618\_0161 (  
PULPROG zg30  
TD 65536  
SOLVENT CDC13  
NS 16  
DS 2  
SWH 8012.820 Hz  
FIDRES 0.244532 Hz  
AQ 4.0894966 sec  
RG 64  
DW 62.400 usec  
DE 6.50 usec  
TE 298.3 K  
D1 1.00000000 sec  
TDO 1  
SFO1 400.1724710 MHz  
NUC1 1H  
P1 9.88 usec  
SI 65536  
SF 400.1700072 MHz  
WDW EM  
SSB 0  
LB 0.30 Hz  
GB 0  
PC 1.00

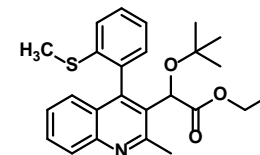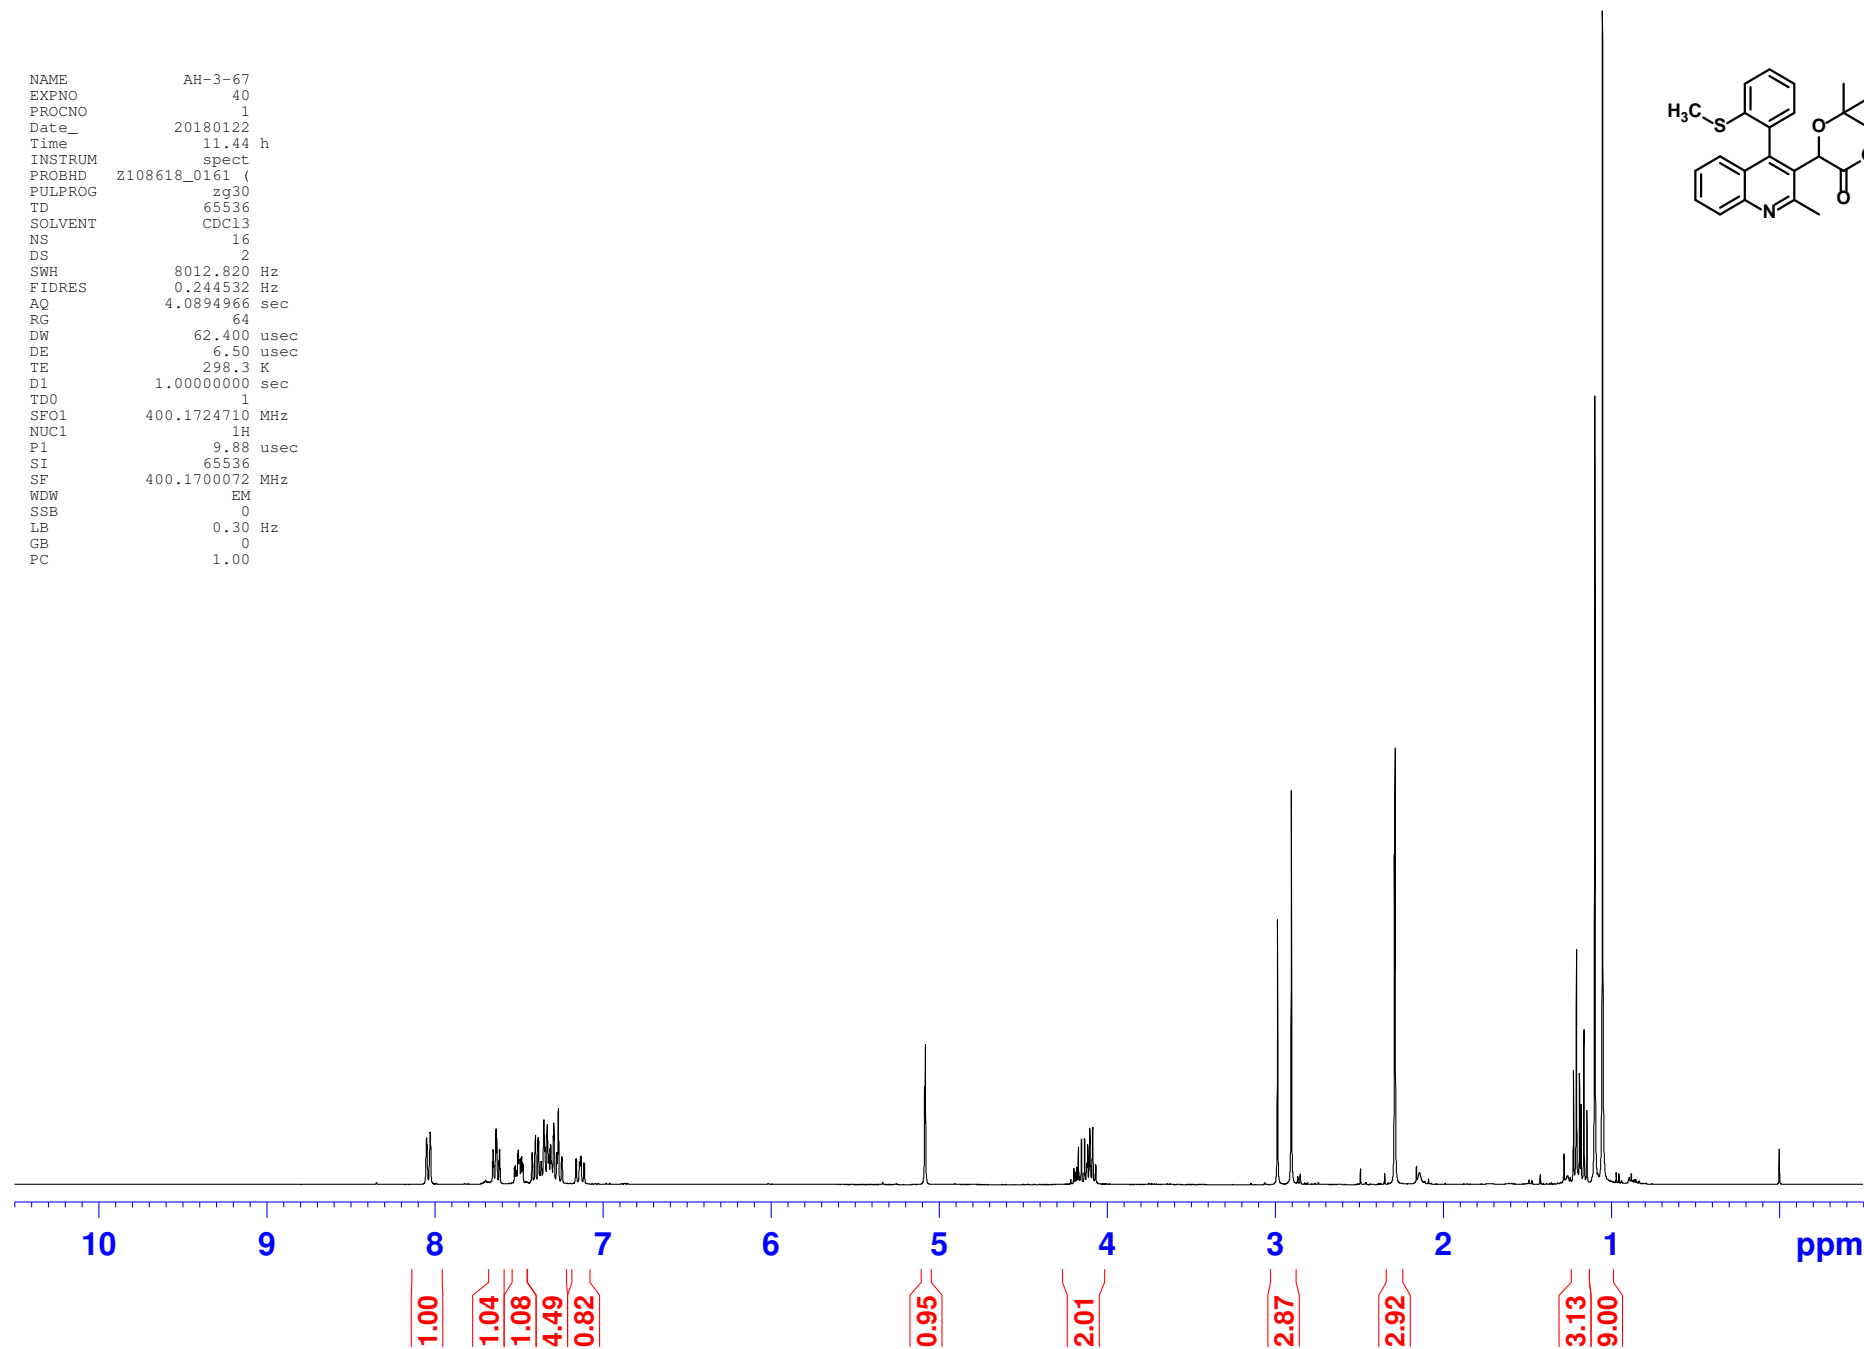

AH-3-67 Characterization

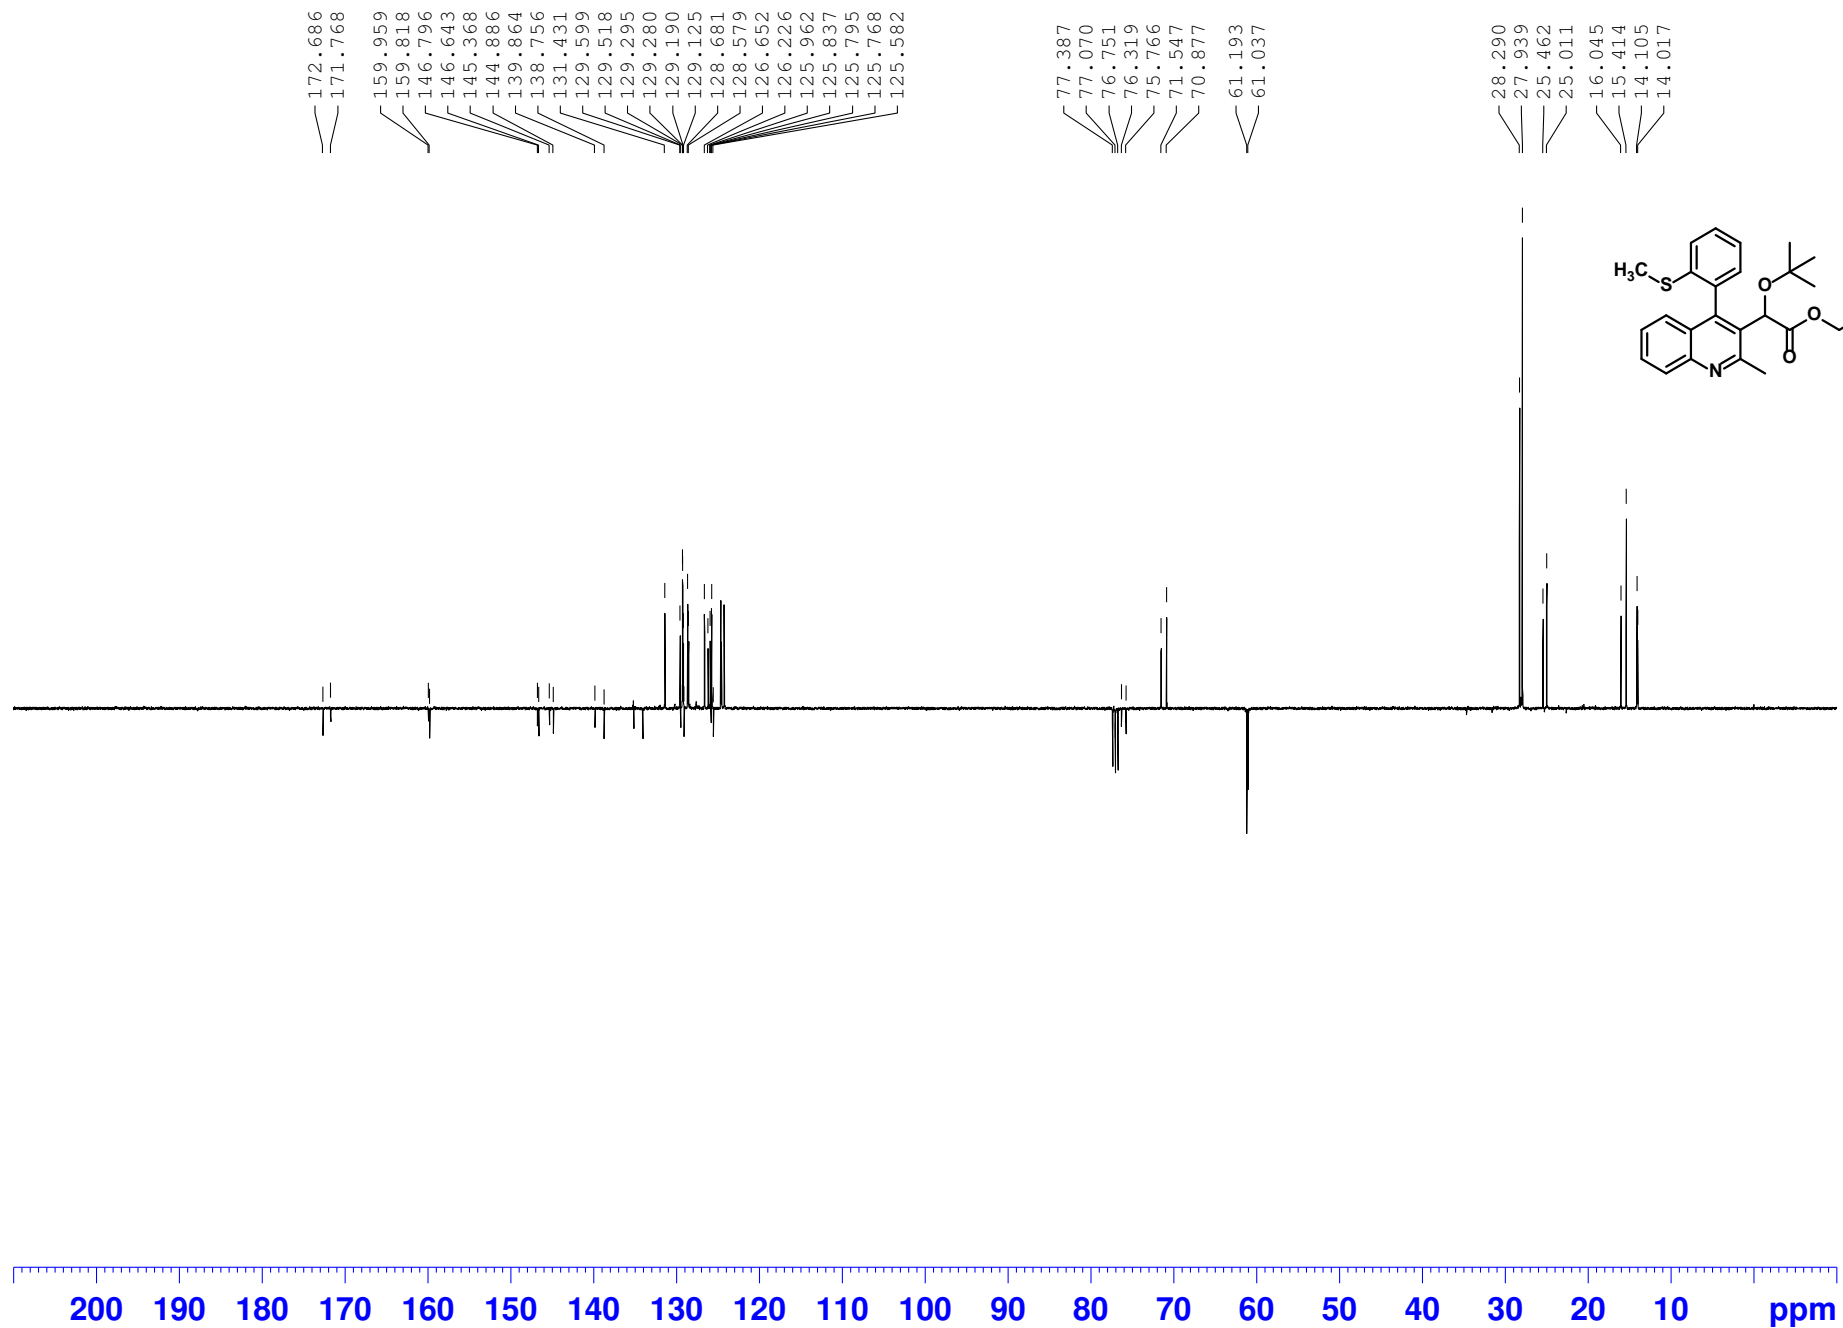



# KM-1-67 Characterization

MISSISS

NAME KM-1-67  
EXPNO 30  
PROCNO 1  
Date\_ 20180204  
Time 16.00 h  
INSTRUM spect  
PROBHD z108618\_0161 (  
PULPROG zg30  
TD 65536  
SOLVENT CDC13  
NS 16  
DS 2  
SWH 8012.820 Hz  
FIDRES 0.244532 Hz  
AQ 4.0894966 sec  
RG 71.8  
DW 62.400 usec  
DE 6.50 usec  
TE 298.1 K  
D1 1.00000000 sec  
TDO 1  
SFO1 400.1724710 MHz  
NUC1 1H  
P1 9.88 usec  
SI 65536  
SF 400.1700060 MHz  
WDW EM  
SSB 0  
LB 0.30 Hz  
GB 0  
PC 1.00

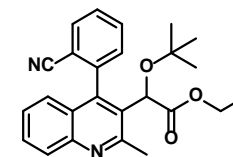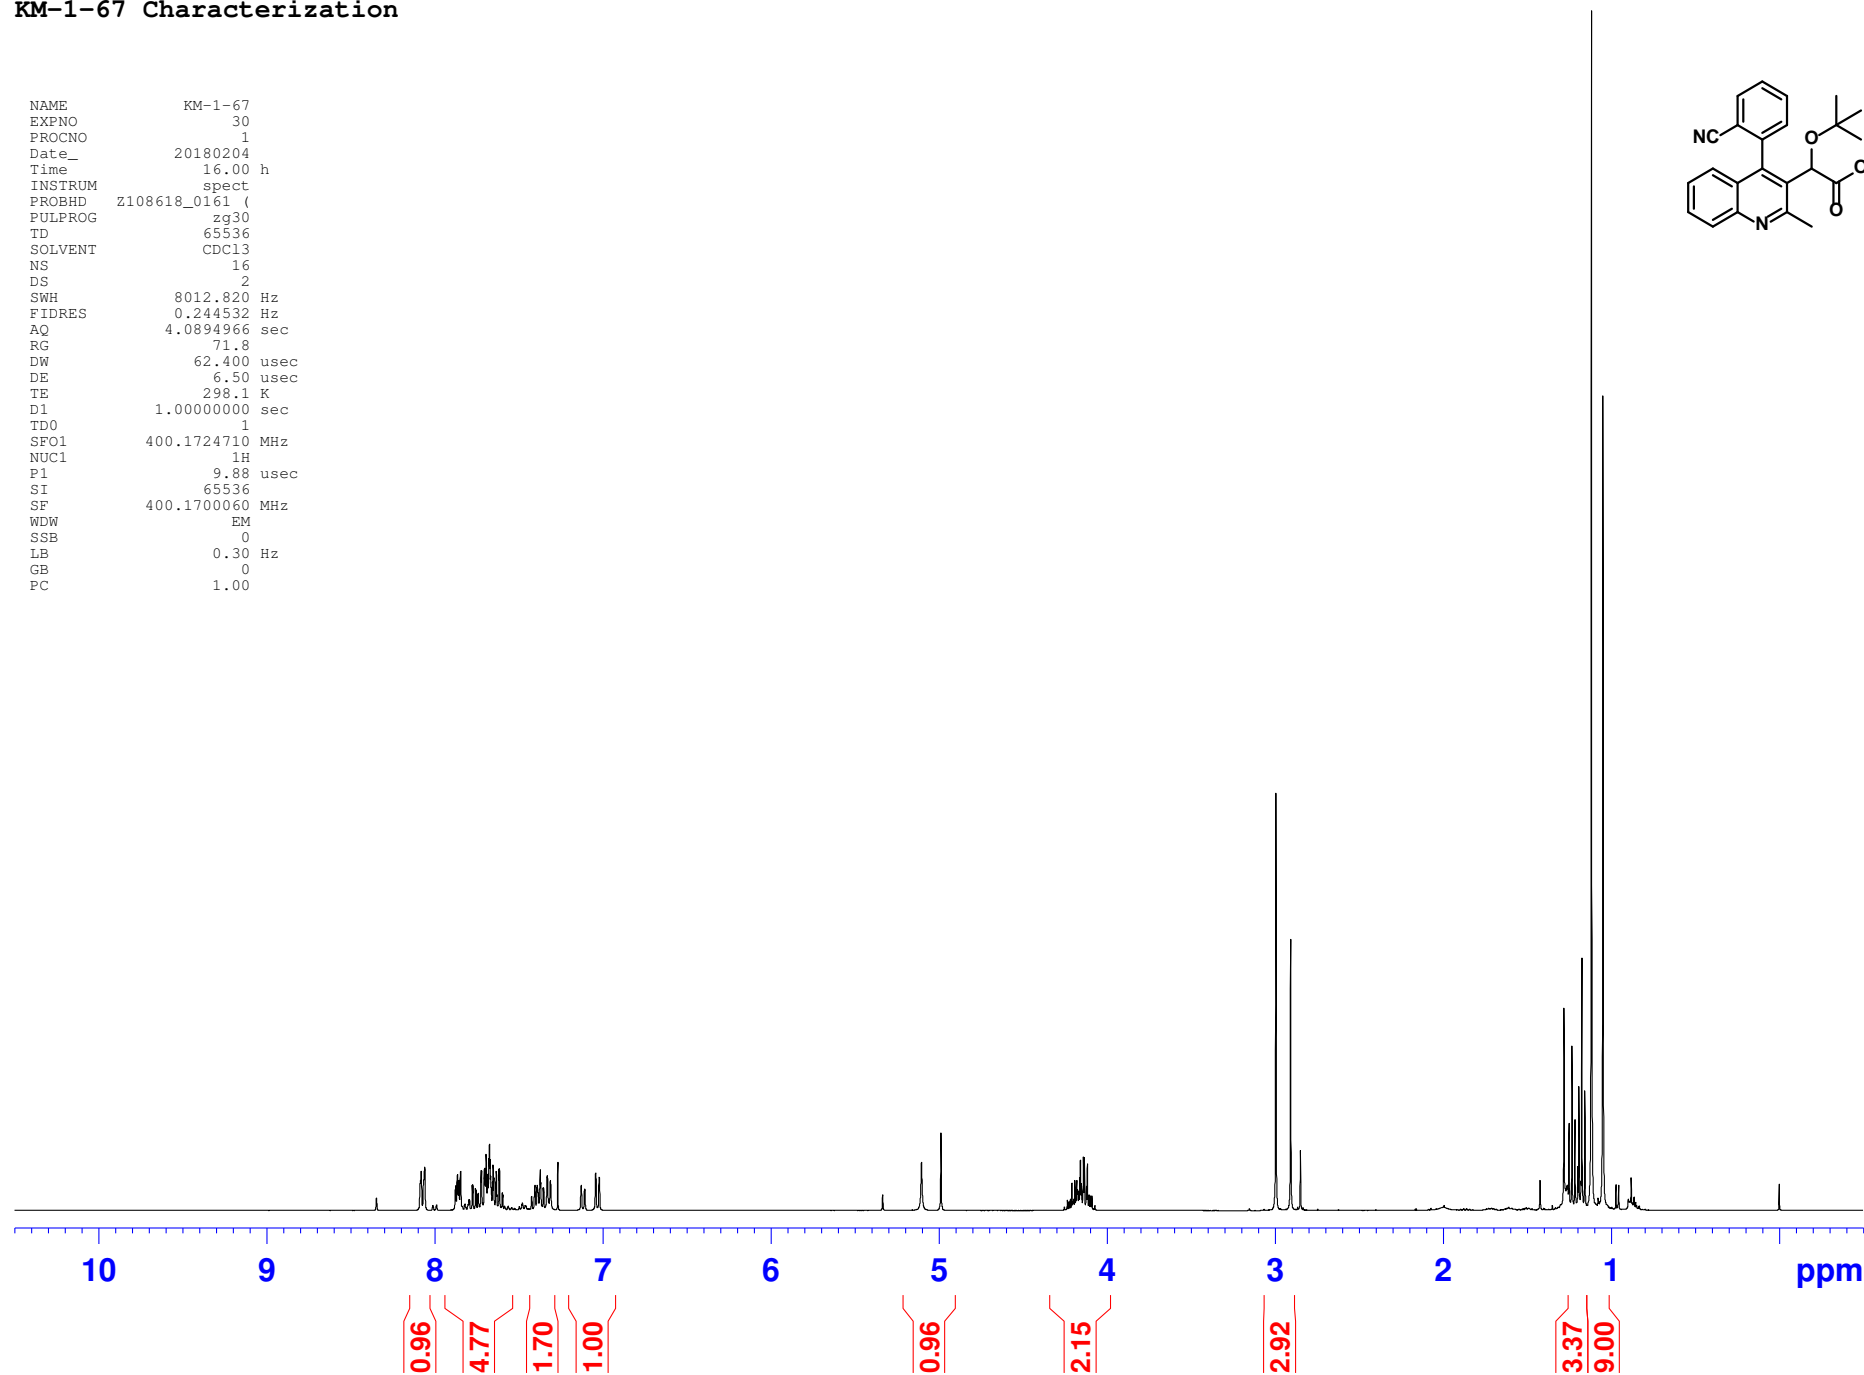

KM-1-67 Characterization

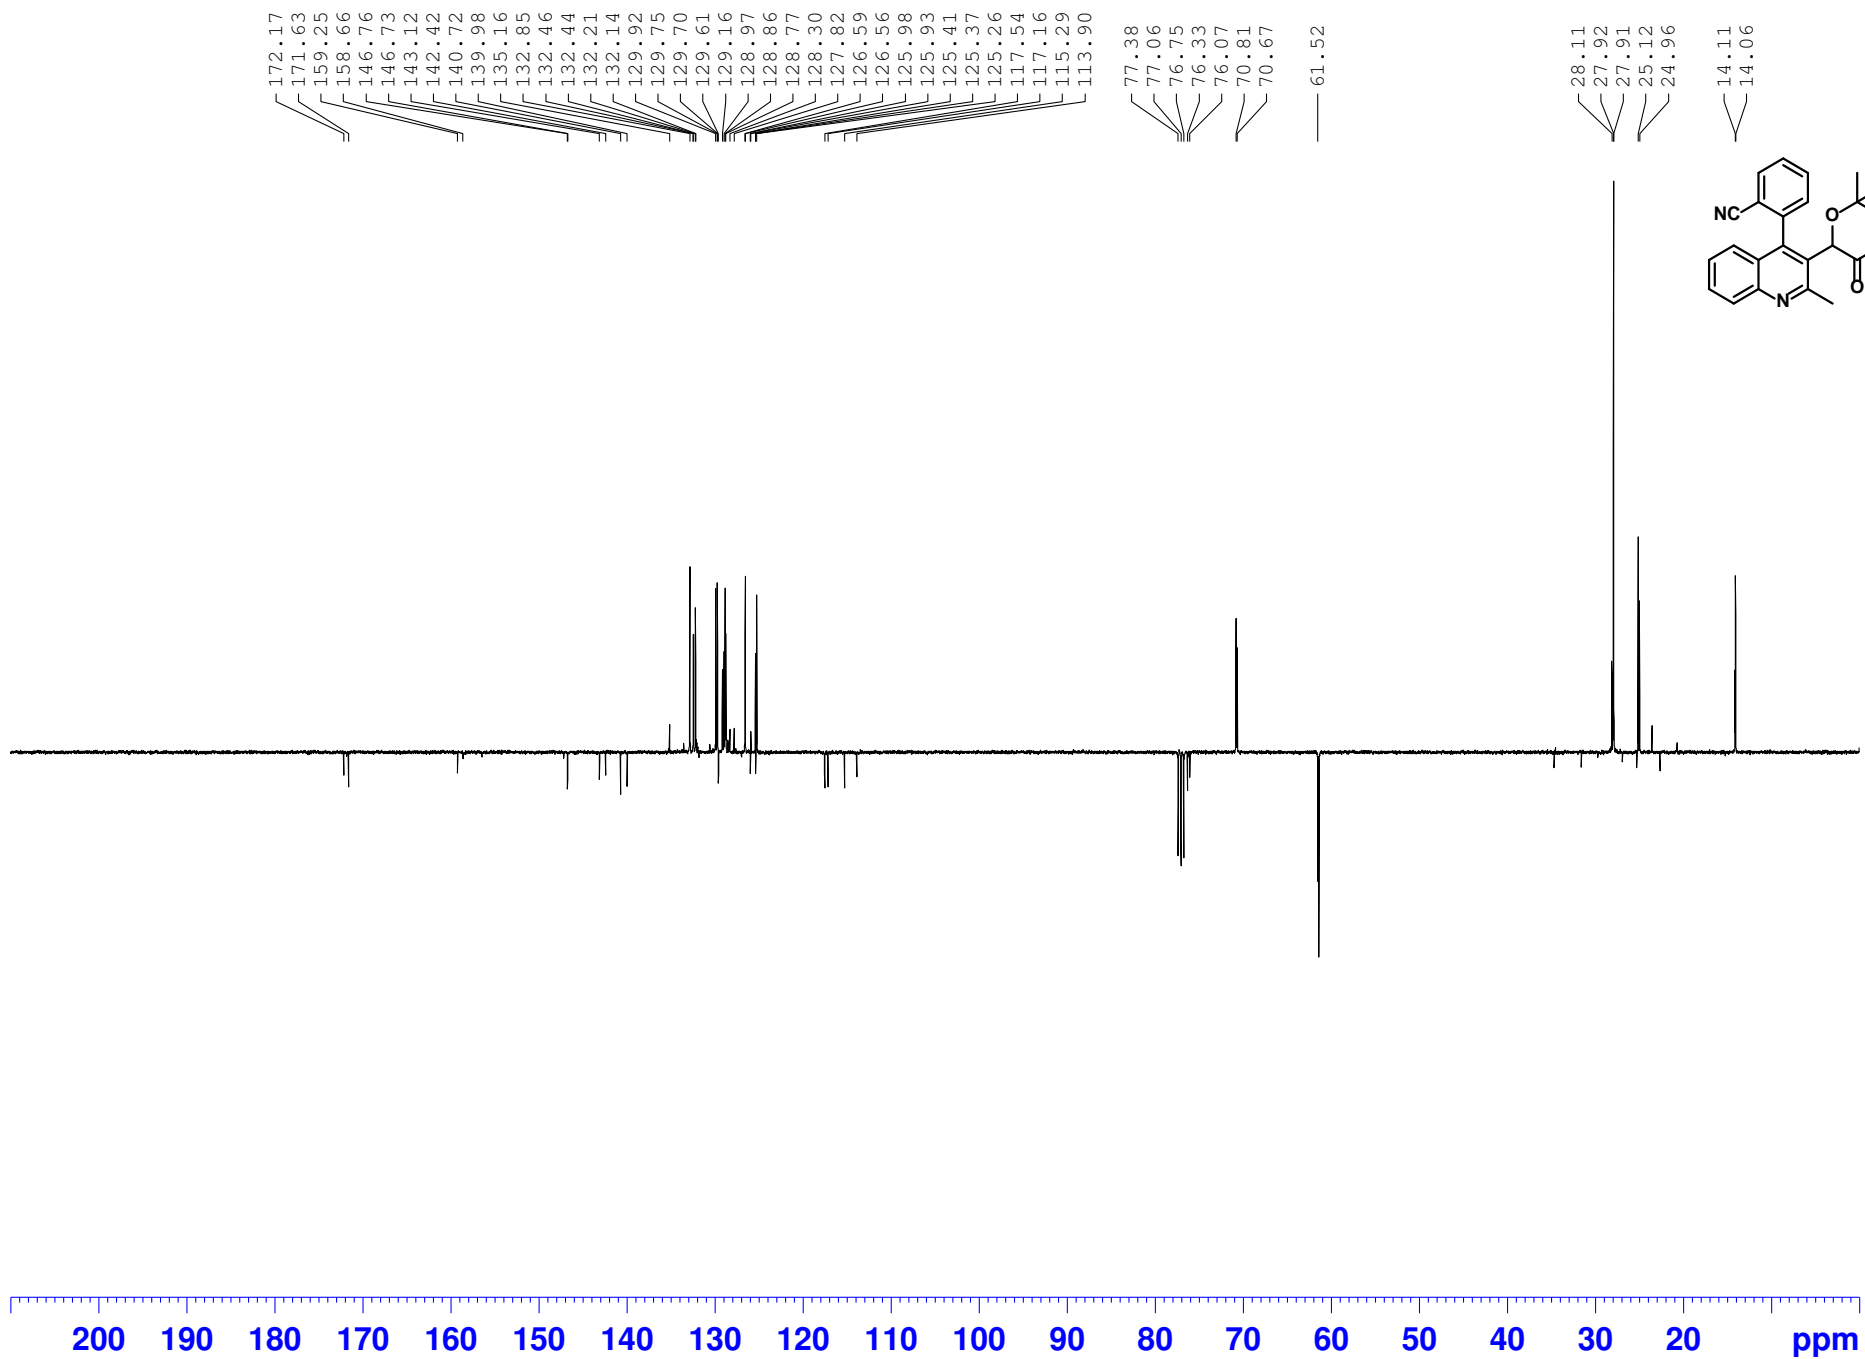

NGJ-8-084 (CDC13, 400 MHz) Pure Brown Oil - suzuki coupling of iodoquinoline with biphenylboron

NAME NGJ-8-084  
 EXPNO 30  
 PROCNO 1  
 Date\_ 20171206  
 Time\_ 17.16 h  
 INSTRUM spect  
 PROBHD Z108618\_0161 ( )  
 PULPROG zg30  
 TD 65536  
 SOLVENT CDC13  
 NS 16  
 DS 2  
 SWH 8012.820 Hz  
 FIDRES 0.244532 Hz  
 AQ 4.0894966 sec  
 RG 114  
 DW 62.400 usec  
 DE 6.50 usec  
 TE 298.3 K  
 D1 1.00000000 sec  
 TD0 1  
 SFO1 400.1724710 MHz  
 NUC1 1H  
 P1 9.88 usec  
 SI 65536  
 SF 400.1700108 MHz  
 WDW EM  
 SSB 0  
 LB 0.30 Hz  
 GB 0  
 PC 1.00

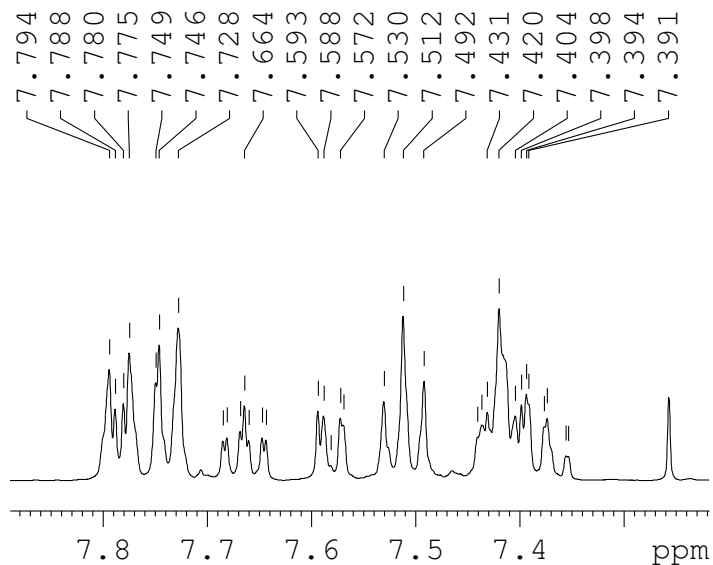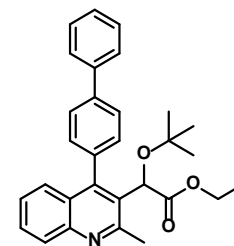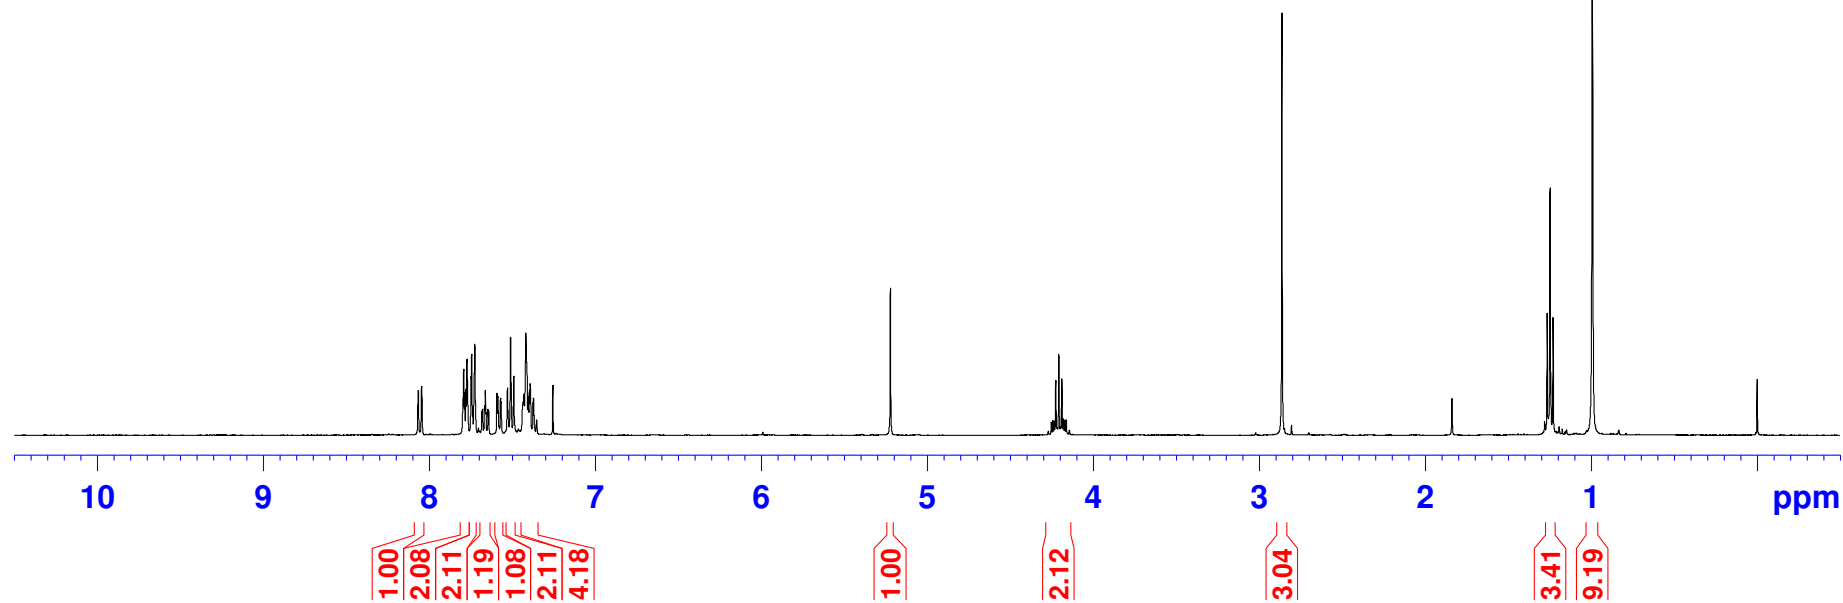

NGJ-8-084 (CDC13, 400 MHz) Pure Brown Oil - suzuki coupling of iodoquinoline with biphenylboronic aci

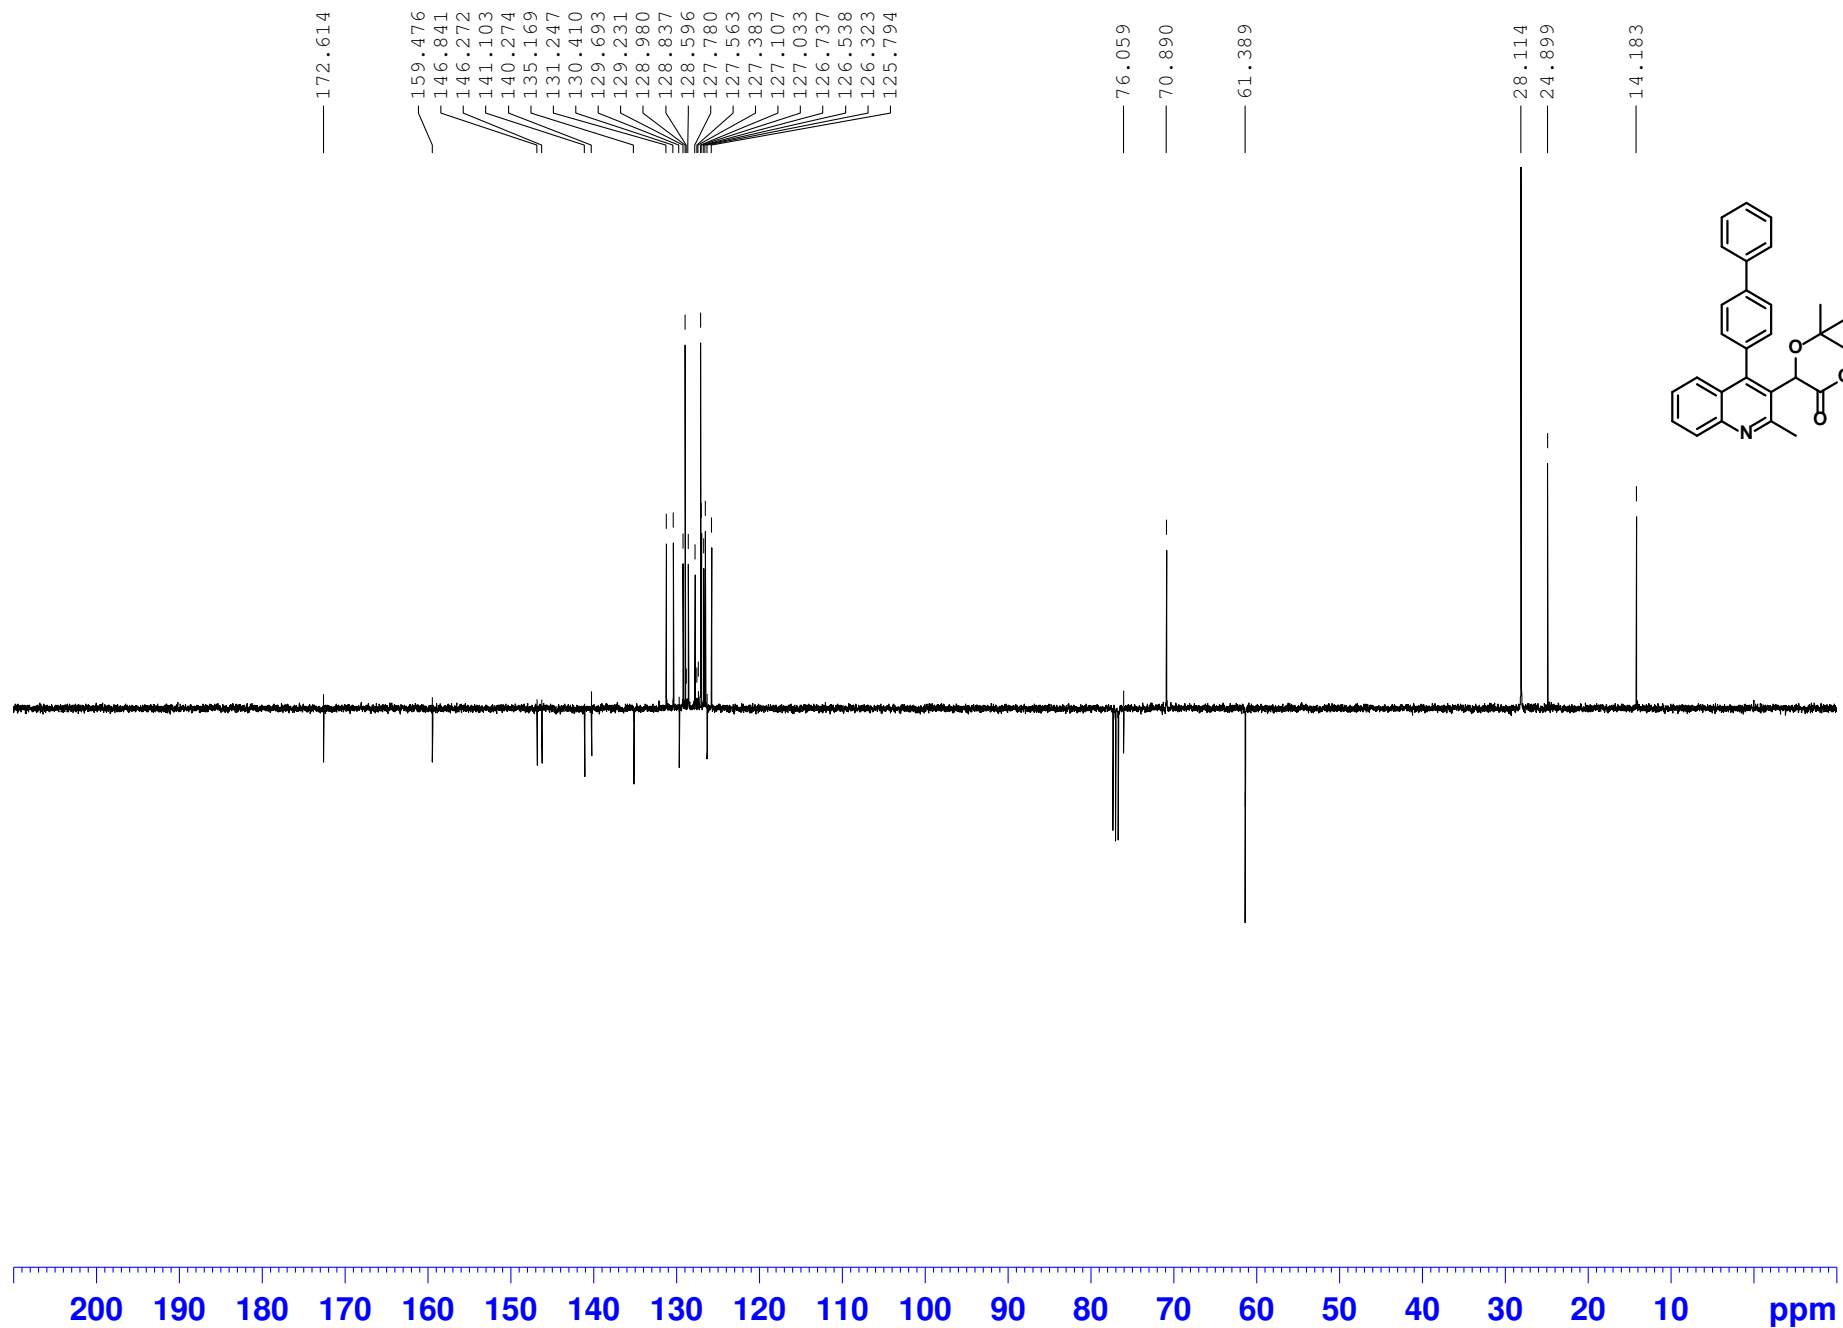

NGJ-9-025 (CDC13, 400 MHz) Pure Yellow Oil - suzuki coupling of iodoquinoline with carboxazole

NAME NGJ-9-025  
EXPNO 30  
PROCNO 1  
Date\_ 20180123  
Time\_ 16.59 h  
INSTRUM spect  
PROBHD Z108618\_0161 (   
PULPROG zg30  
TD 65536  
SOLVENT CDC13  
NS 16  
DS 2  
SWH 8012.820 Hz  
FIDRES 0.244532 Hz  
AQ 4.0894966 sec  
RG 64  
DW 62.400 usec  
DE 6.50 usec  
TE 298.3 K  
D1 1.00000000 sec  
TD0 1  
SF01 400.1724710 MHz  
NUC1 1H  
P1 9.88 usec  
SI 65536  
SF 400.1700173 MHz  
WDW EM  
SSB 0  
LB 0.30 Hz  
GB 0  
PC 1.00

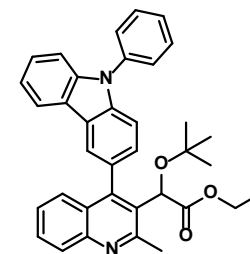

NGJ-9-025 (CDCl<sub>3</sub>, 400 MHz) Pure Yellow Oil - suzuki coupling of iodoquinoline with carboxazole boroni

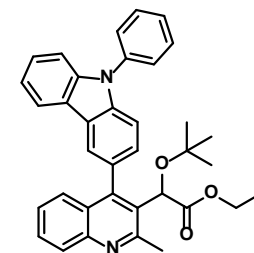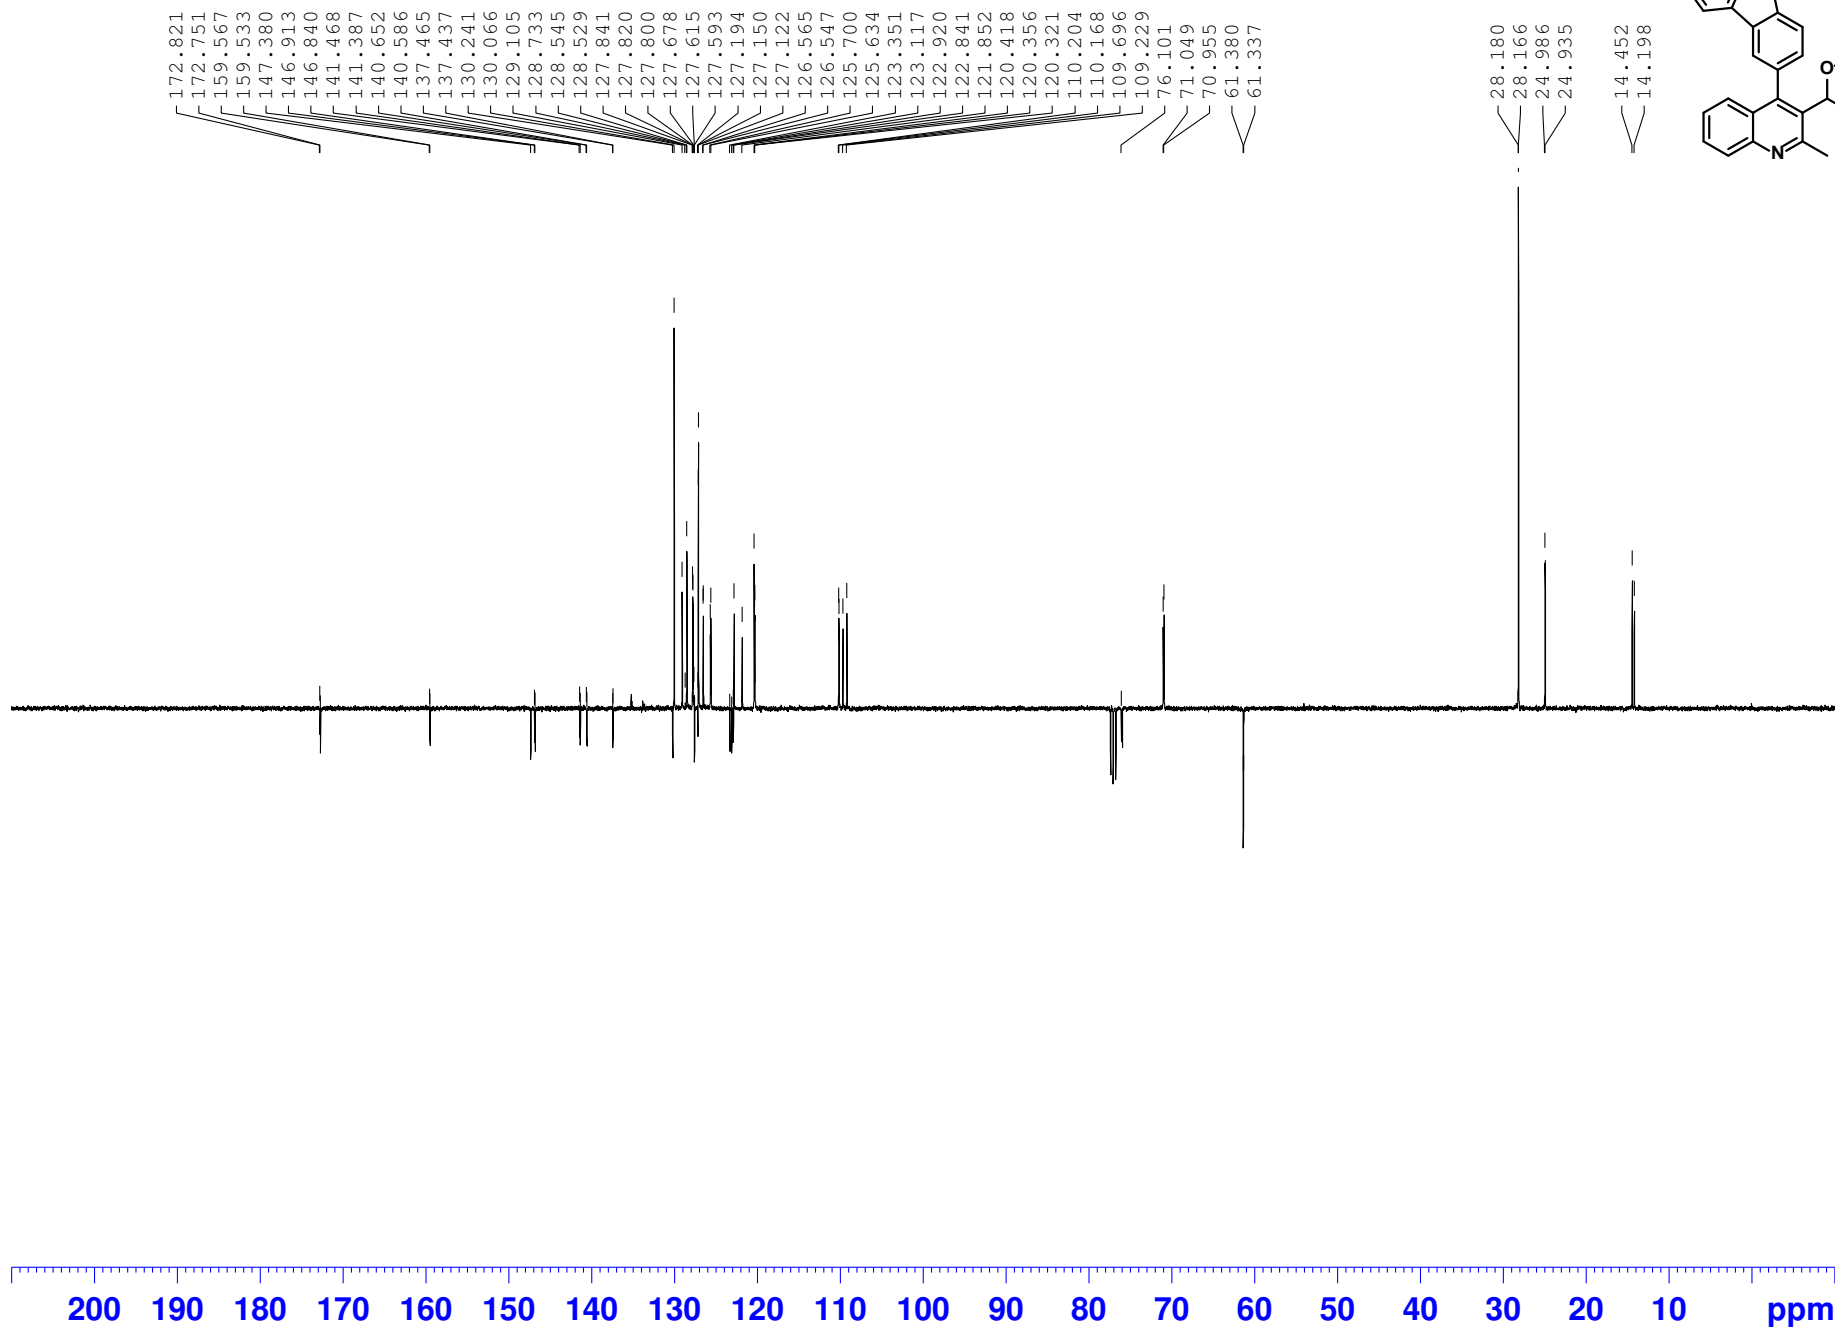

## Furan-3-quinoline derivative

NAME AH-3-33  
EXPNO 40  
PROCNO 1  
Date\_ 20171011  
Time 17.46 h  
INSTRUM spect  
PROBHD z108618\_0161 (  
PULPROG zg30  
TD 65536  
SOLVENT CDCl3  
NS 16  
DS 2  
SWH 8012.820 Hz  
FIDRES 0.244532 Hz  
AQ 4.0894966 sec  
RG 181  
DW 62.400 usec  
DE 6.50 usec  
TE 297.8 K  
D1 1.00000000 sec  
TDO 1  
SFO1 400.1724710 MHz  
NUC1 1H  
P1 9.88 usec  
SI 65536  
SF 400.1700099 MHz  
WDW EM  
SSB 0  
LB 0.30 Hz  
GB 0  
PC 1.00

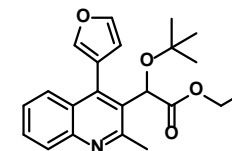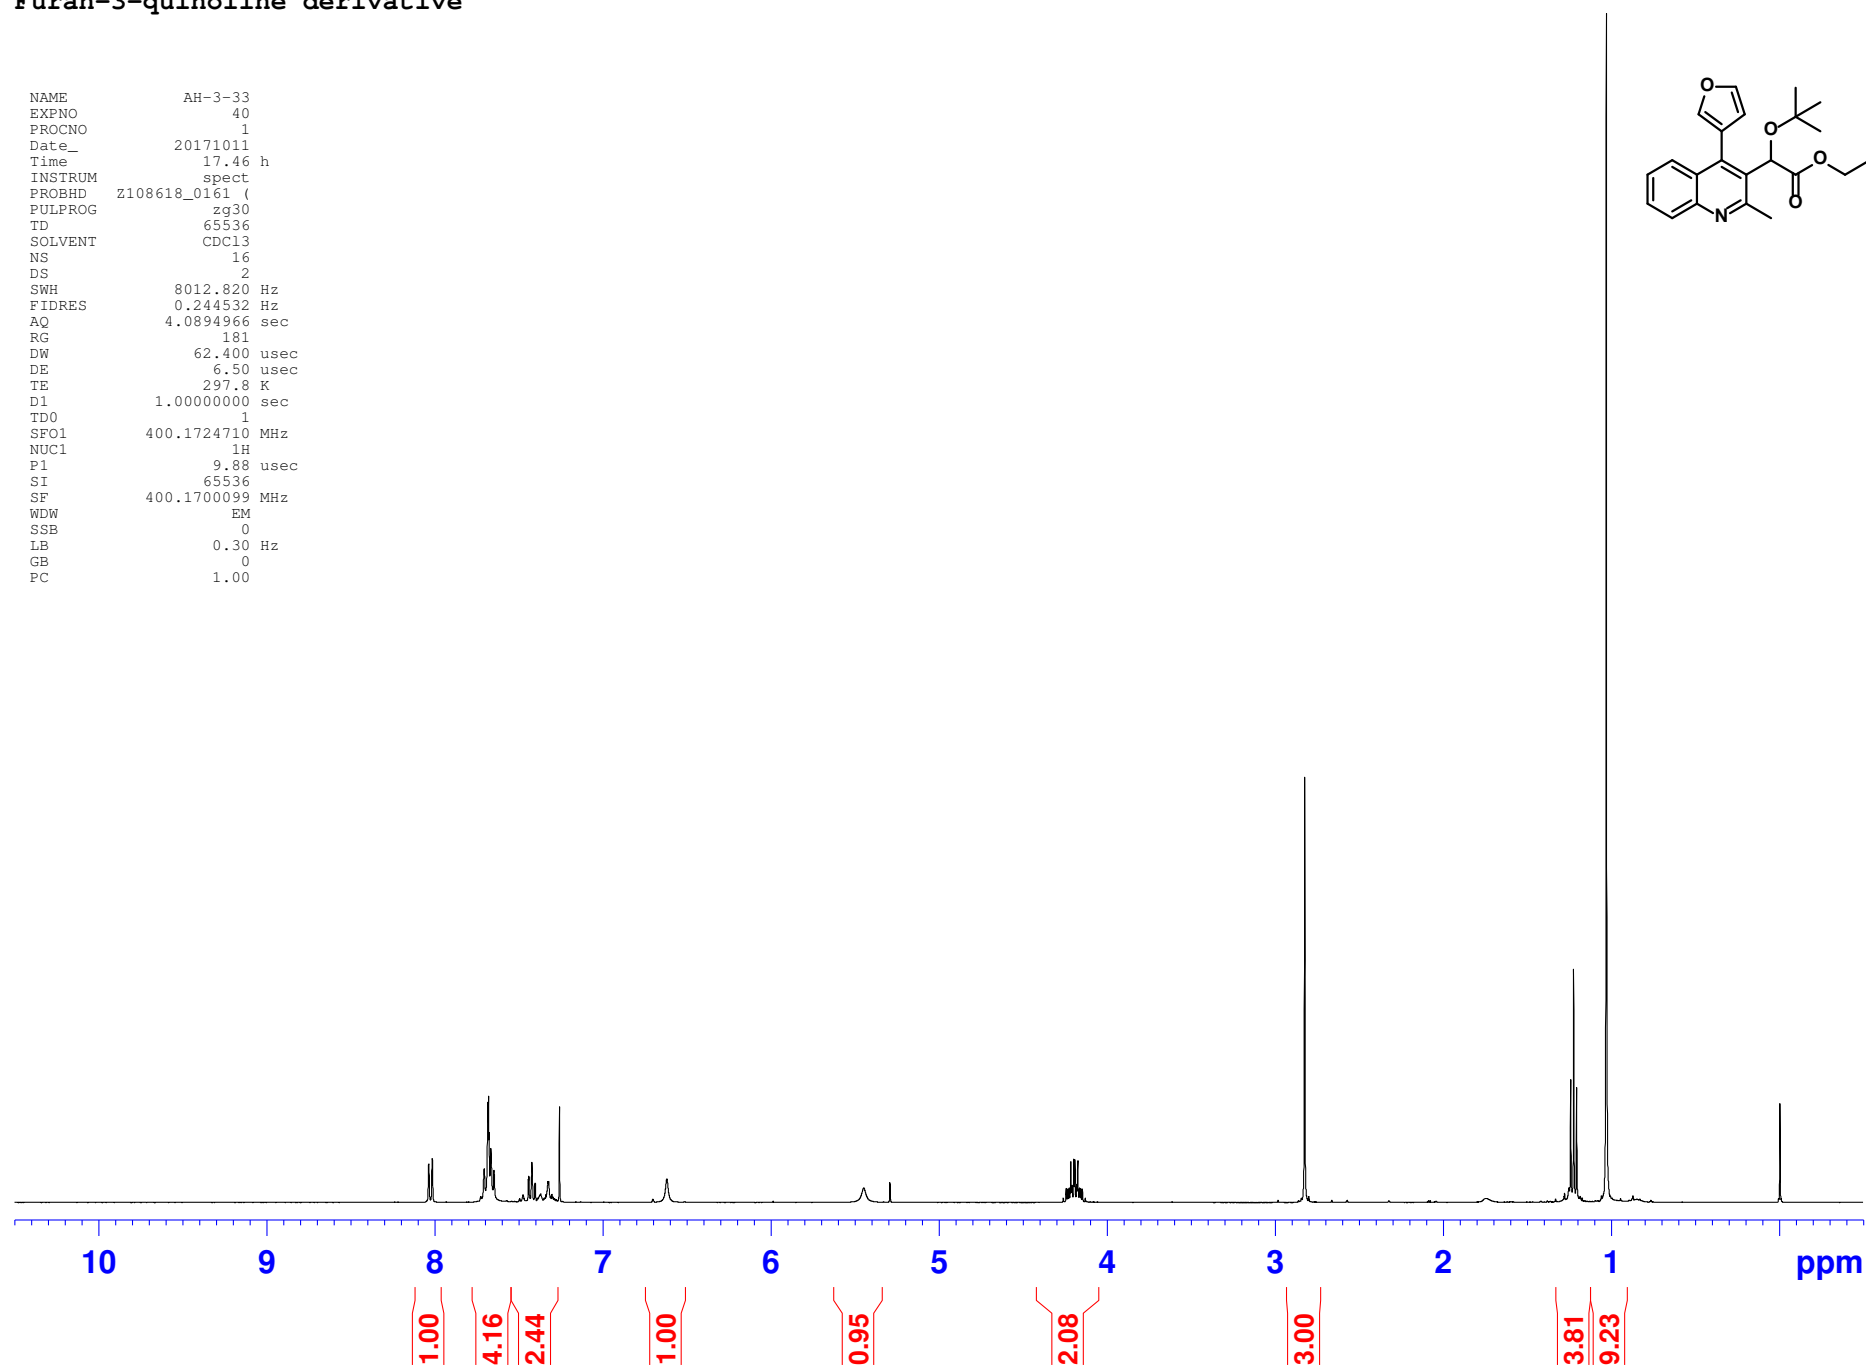

Furan-3-quinoline derivative

MISSISS

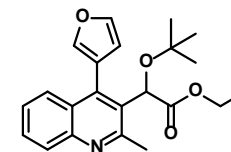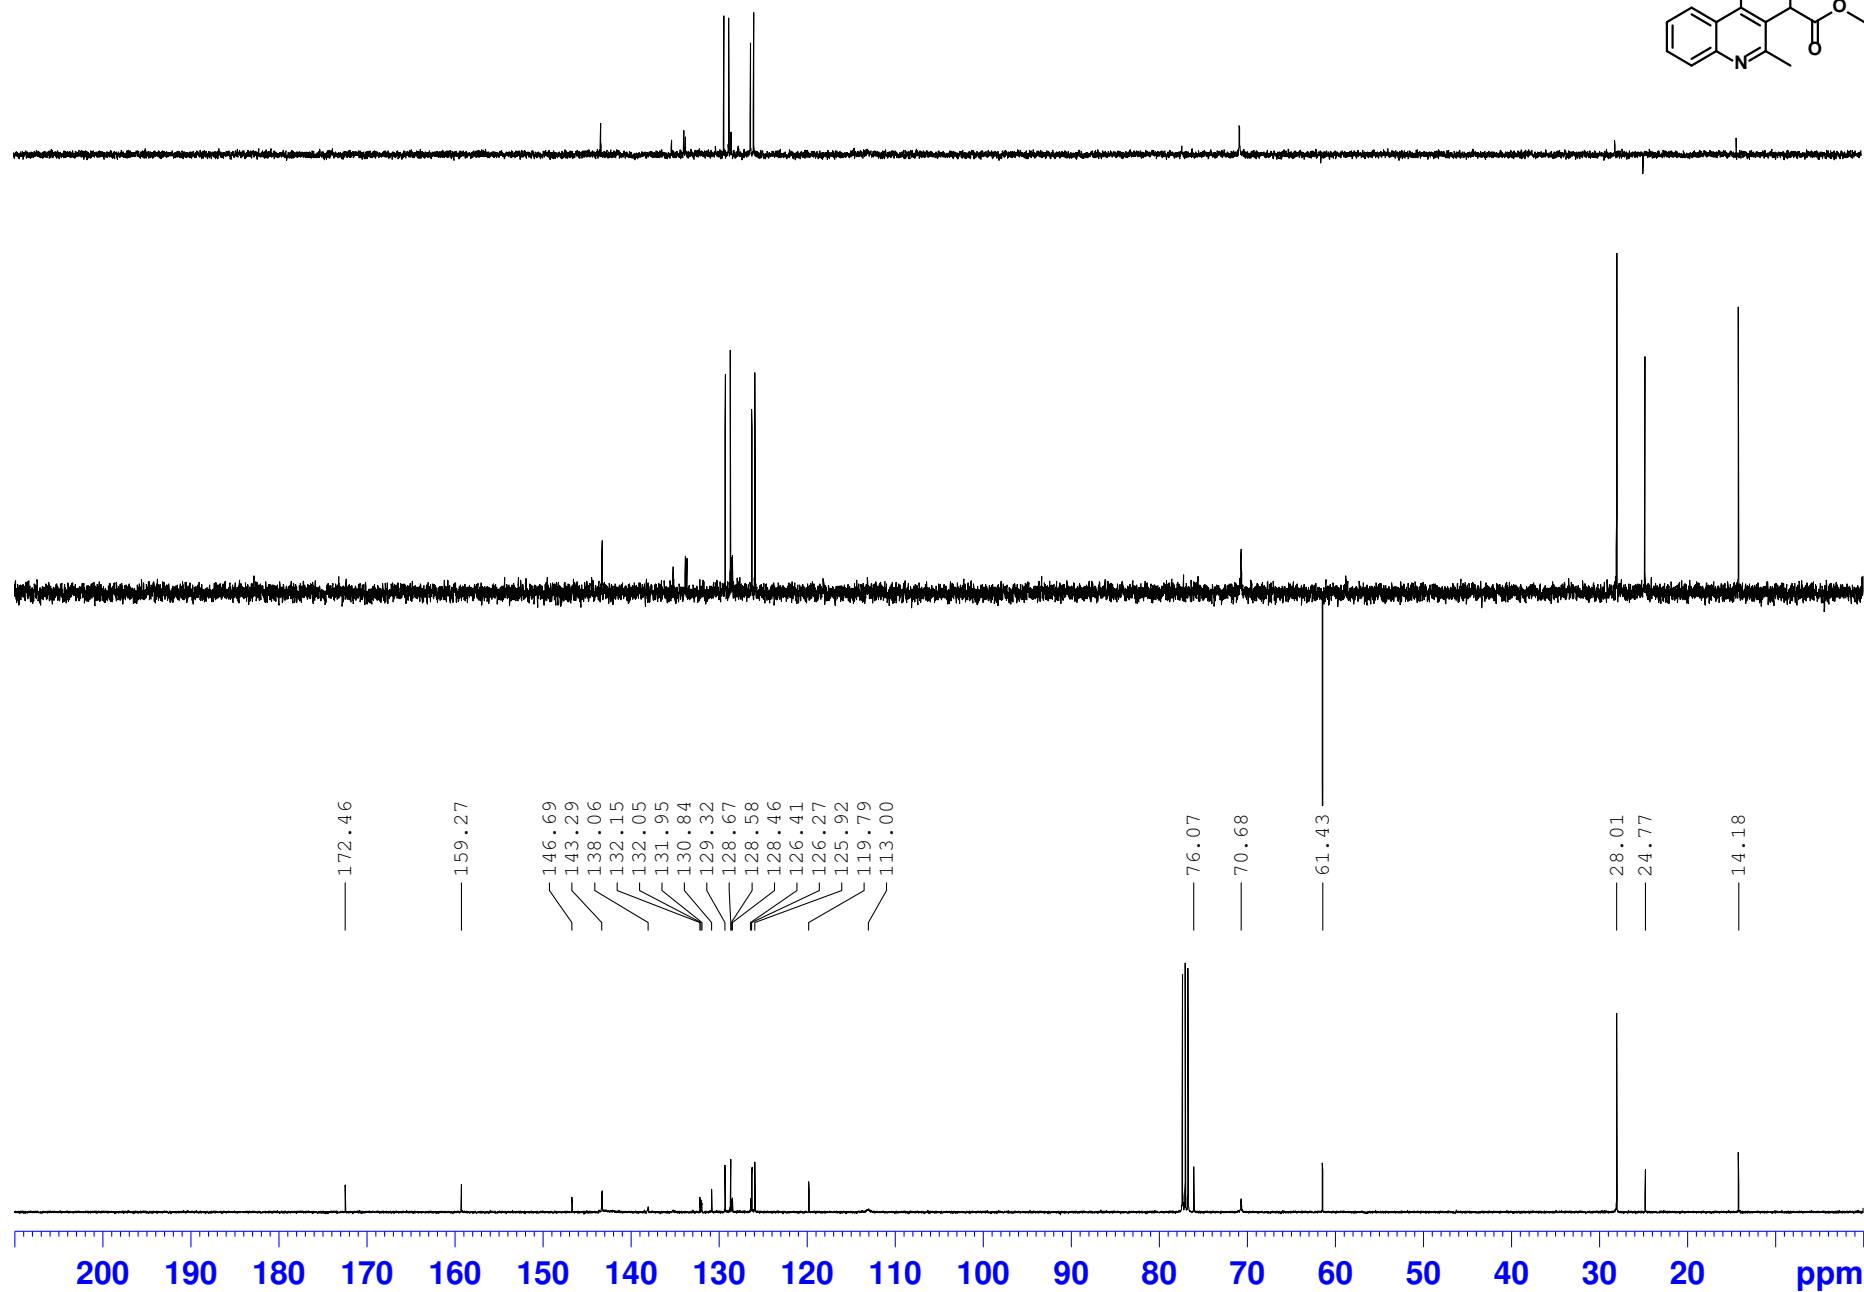



# AH-3-49 Characterization

MISSISS

NAME AH-3-49  
EXPNO 60  
PROCNO 1  
Date\_ 20171129  
Time 12.06 h  
INSTRUM spect  
PROBHD z108618\_0161 (  
PULPROG zg30  
TD 65536  
SOLVENT CDC13  
NS 16  
DS 2  
SWH 8012.820 Hz  
FIDRES 0.244532 Hz  
AQ 4.0894966 sec  
RG 64  
DW 62.400 usec  
DE 6.50 usec  
TE 298.2 K  
D1 1.00000000 sec  
TDO 1  
SFO1 400.1724710 MHz  
NUC1 1H  
P1 9.88 usec  
SI 65536  
SF 400.1700052 MHz  
WDW EM  
SSB 0  
LB 0.30 Hz  
GB 0  
PC 1.00

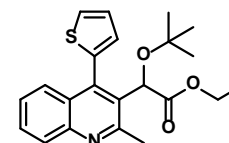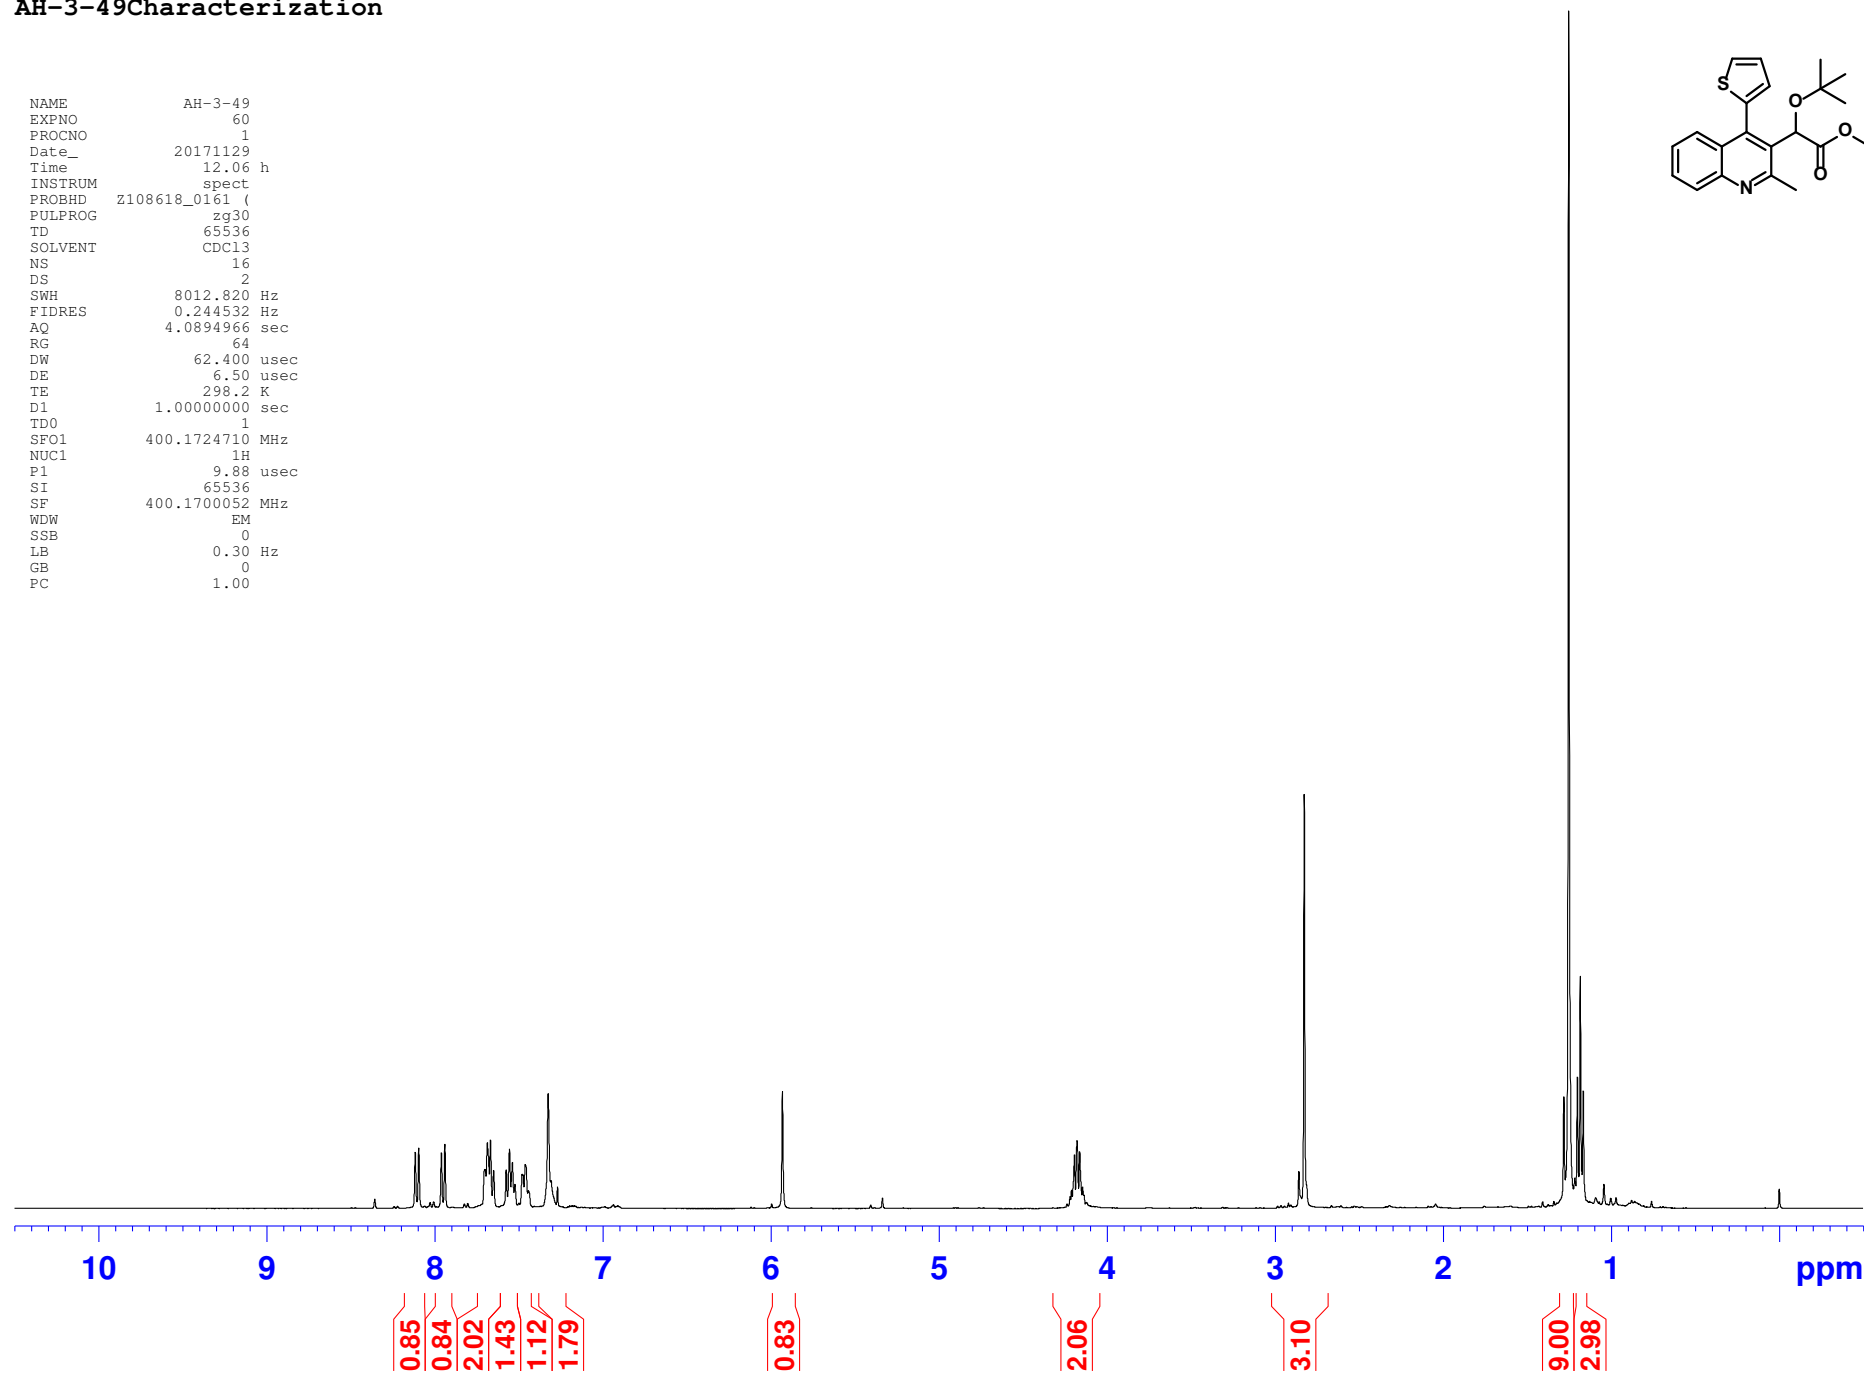

AH-3-49Characterization

MISSISS

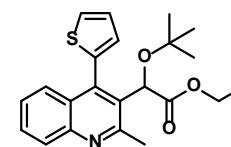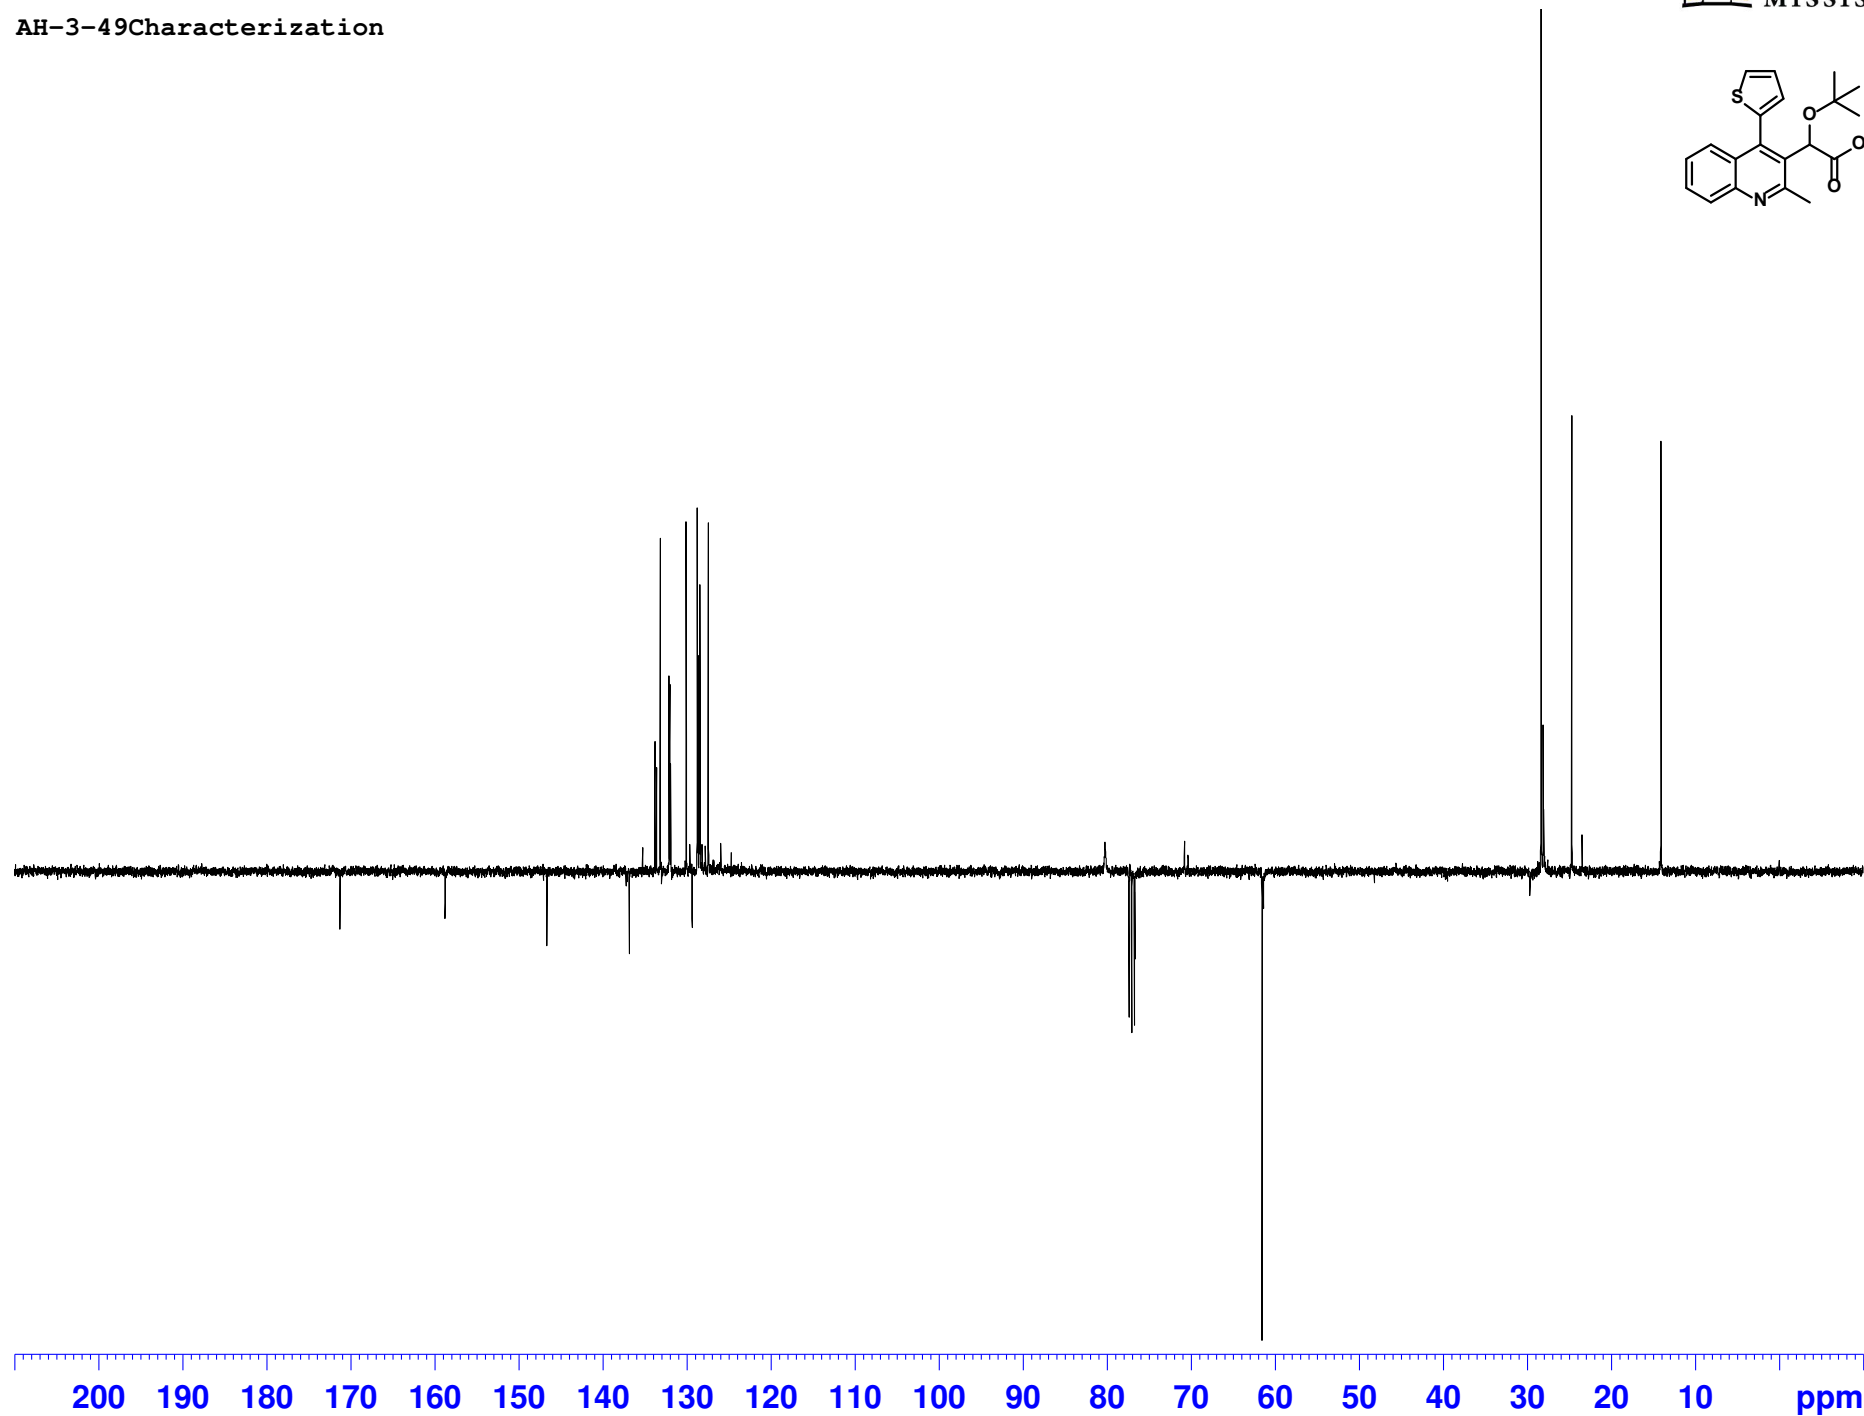

NGJ-9-003 (CDC13, 400 MHz) Pure Yellow Oil - suzuki coupling of iodoquinoline with pyrimidine

NAME NGJ-9-003  
 EXPNO 30  
 PROCNO 1  
 Date\_ 20171222  
 Time\_ 10.18 h  
 INSTRUM spect  
 PROBHD Z108618\_0161 (  
 PULPROG zg30  
 TD 65536  
 SOLVENT CDC13  
 NS 16  
 DS 2  
 SWH 8012.820 Hz  
 FIDRES 0.244532 Hz  
 AQ 4.0894966 sec  
 RG 114  
 DW 62.400 usec  
 DE 6.50 usec  
 TE 298.3 K  
 D1 1.00000000 sec  
 TD0 1  
 SFO1 400.1724710 MHz  
 NUC1 1H  
 P1 9.88 usec  
 SI 65536  
 SF 400.1700028 MHz  
 WDW EM  
 SSB 0  
 LB 0.30 Hz  
 GB 0  
 PC 1.00

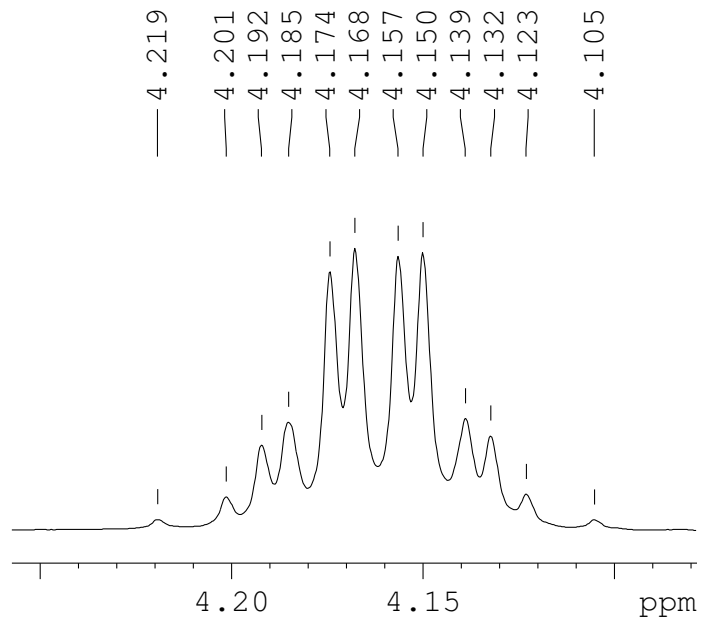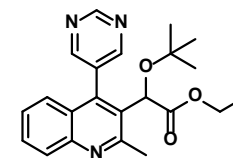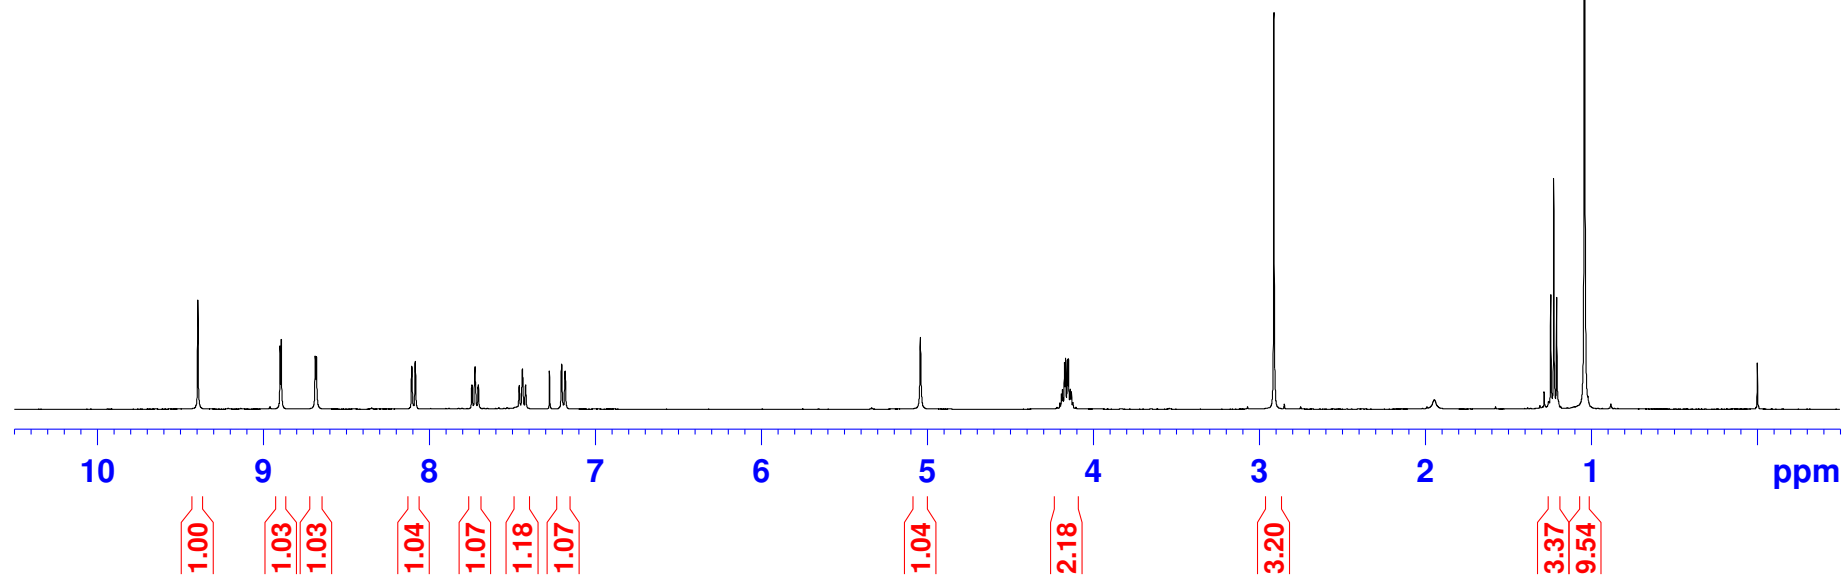

NGJ-9-003 CDC13

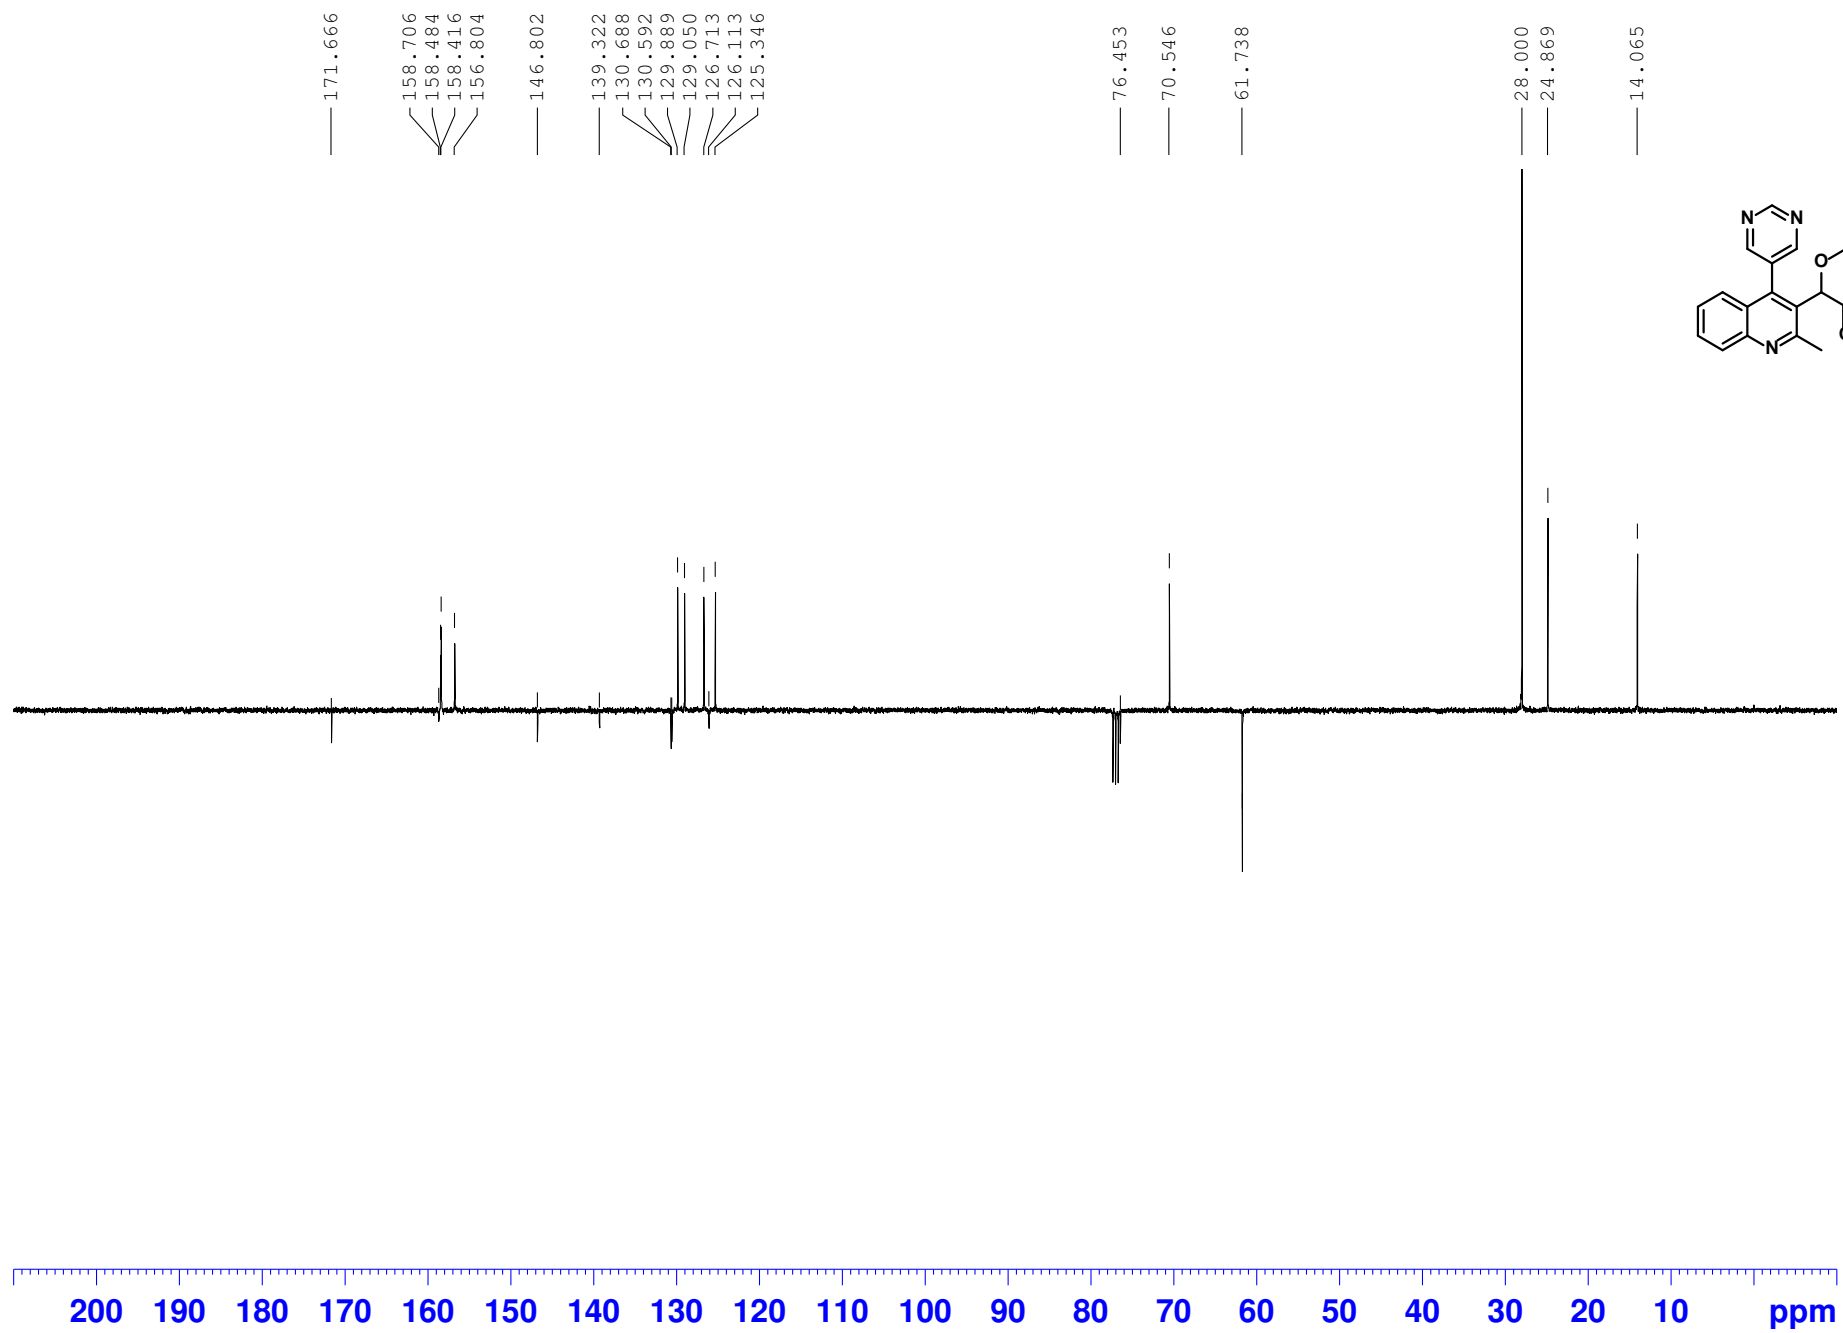

NGJ-8-099 (CDC13, 400 MHz) Pure Yellow Oil - suzuki coupling of iodoquinoline with benzodioxane

NAME NGJ-8-099  
 EXPNO 40  
 PROCNO 1  
 Date\_ 20180207  
 Time\_ 18.55 h  
 INSTRUM spect  
 PROBHD Z108618\_0161 (zg30)  
 PULPROG zg30  
 TD 65536  
 SOLVENT CDC13  
 NS 16  
 DS 2  
 SWH 8012.820 Hz  
 FIDRES 0.244532 Hz  
 AQ 4.0894966 sec  
 RG 101  
 DW 62.400 usec  
 DE 6.50 usec  
 TE 298.2 K  
 D1 1.00000000 sec  
 TD0 1  
 SFO1 400.1724710 MHz  
 NUC1 1H  
 P1 9.88 usec  
 SI 65536  
 SF 400.1700070 MHz  
 WDW EM  
 SSB 0  
 LB 0.30 Hz  
 GB 0  
 PC 1.00

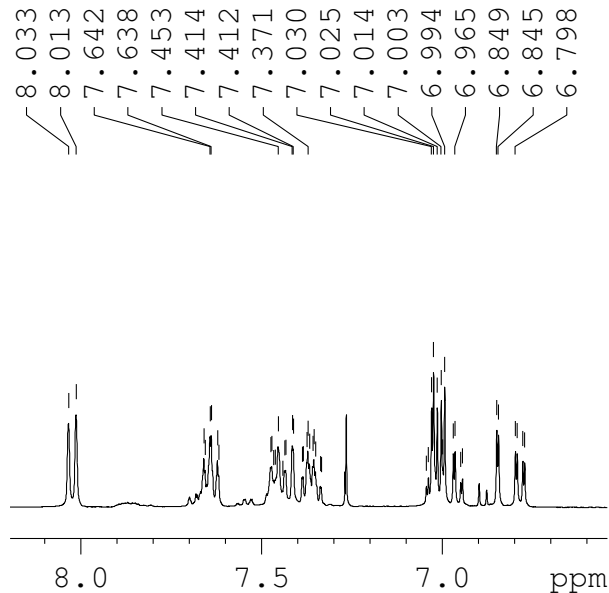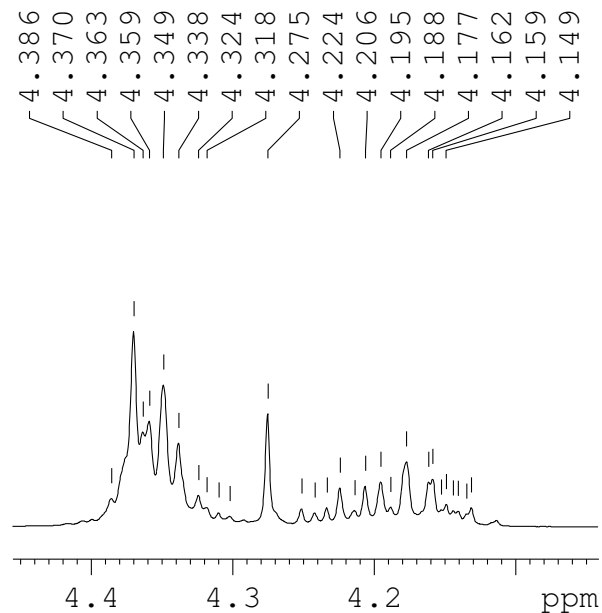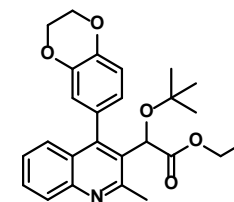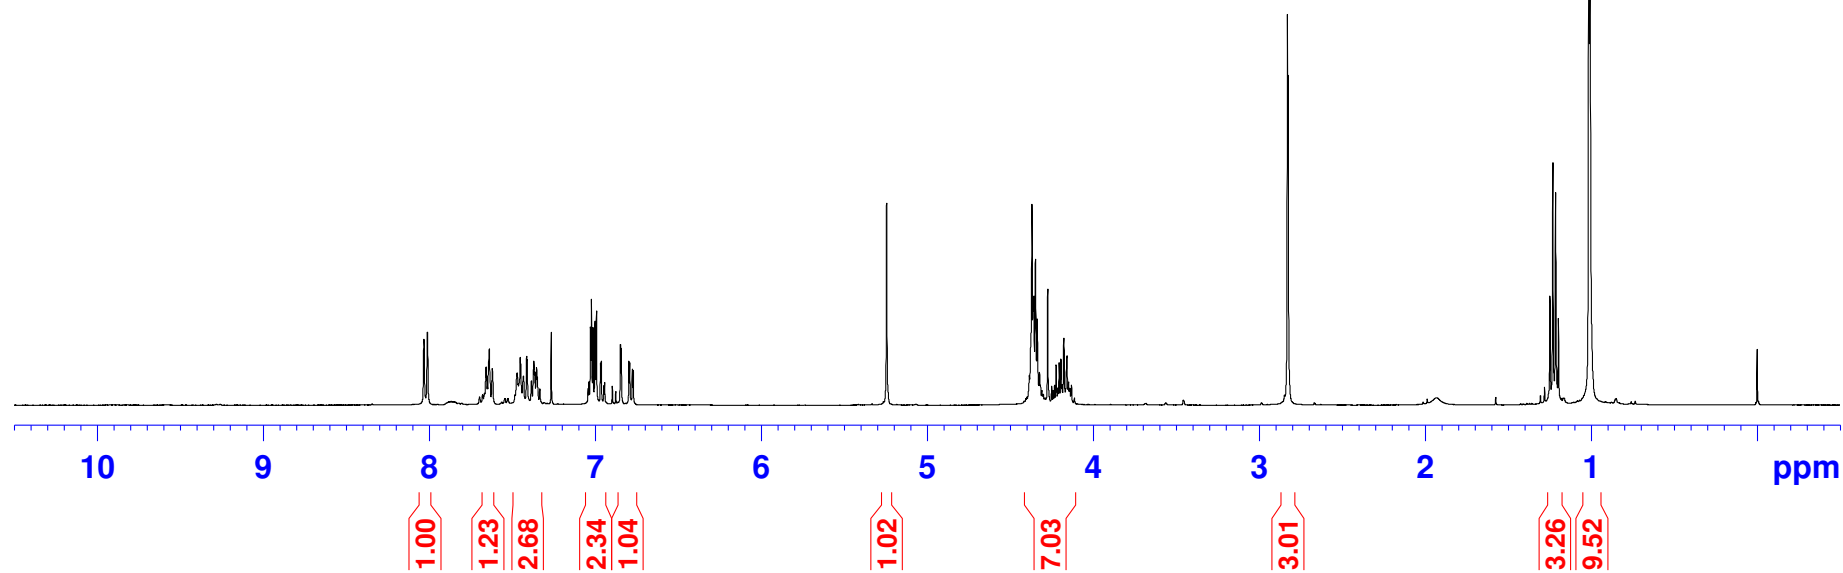

NGJ-8-099 (CDCl<sub>3</sub>, 400 MHz) Pure Yellow Oil - suzuki coupling of iodoquinoline with benzodioxaneboroni

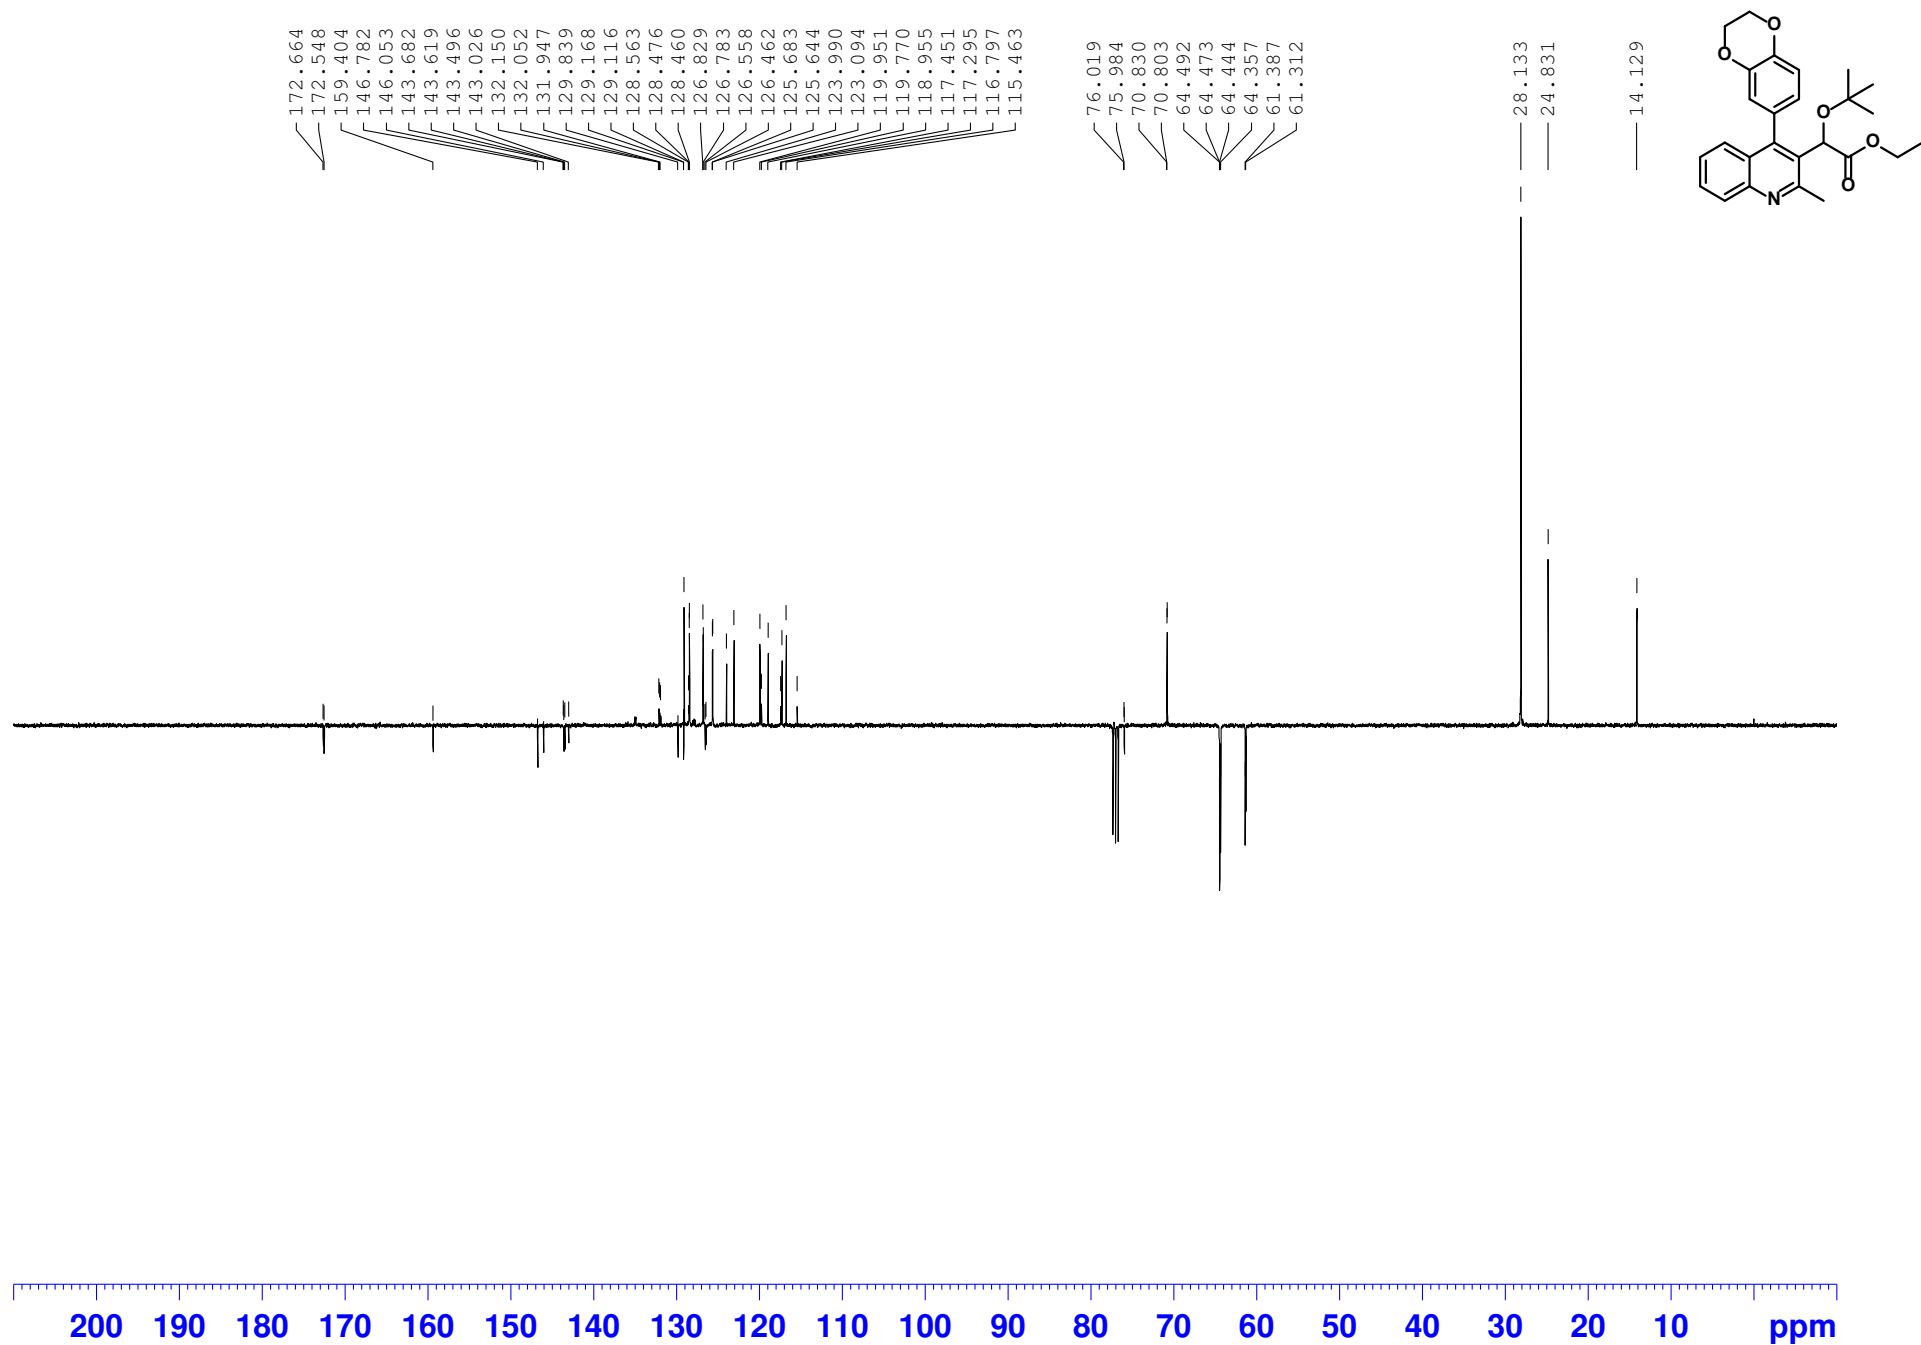

NGJ-9-091 (CDC13, 400 MHz) synthesis of 3,4-dimethoxy quinoline ester

Current Data Parameters  
NAME NGJ-9-091  
EXPNO 40  
PROCNO 1

F2 - Acquisition Parameters  
Date\_ 20180705  
Time\_ 21.04 h  
INSTRUM spect  
PROBHD Z108618\_0161 (   
PULPROG zg30  
TD 65536  
SOLVENT CDC13  
NS 16  
DS 2  
SWH 8012.820 Hz  
FIDRES 0.244532 Hz  
AQ 4.0894465 sec  
RG 114  
DW 62.400 usec  
DE 6.50 usec  
TE 298.3 K  
D1 1.00000000 sec  
TDO 1  
SFO1 400.1724710 MHz  
NUC1 1H  
P1 9.88 usec  
PLW1 28.50000000 W

F2 - Processing parameters  
SI 65536  
SF 400.1700057 MHz  
WDW EM  
SSB 0  
LB 0.30 Hz  
GB 0  
PC 1.00

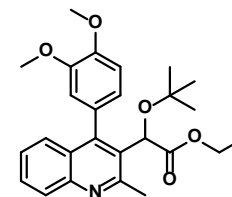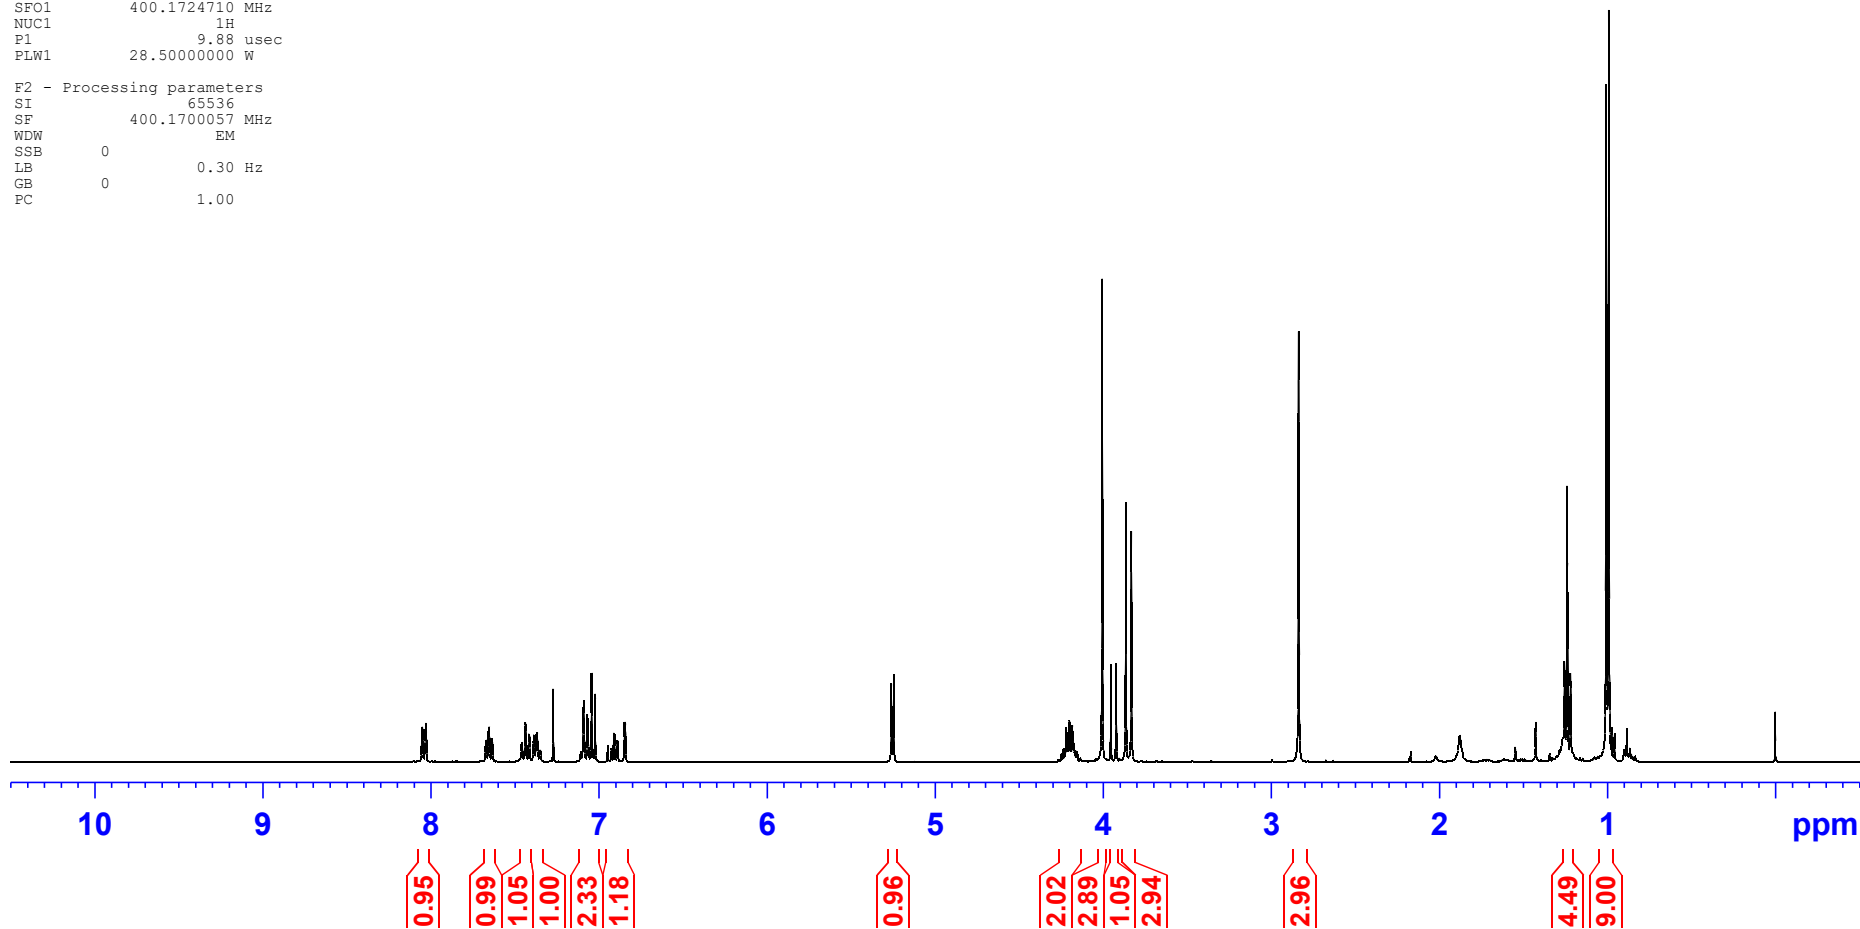

NGJ-9-091 (CDC13, 400 MHz) suzuki coupling of iodoquinoline wit

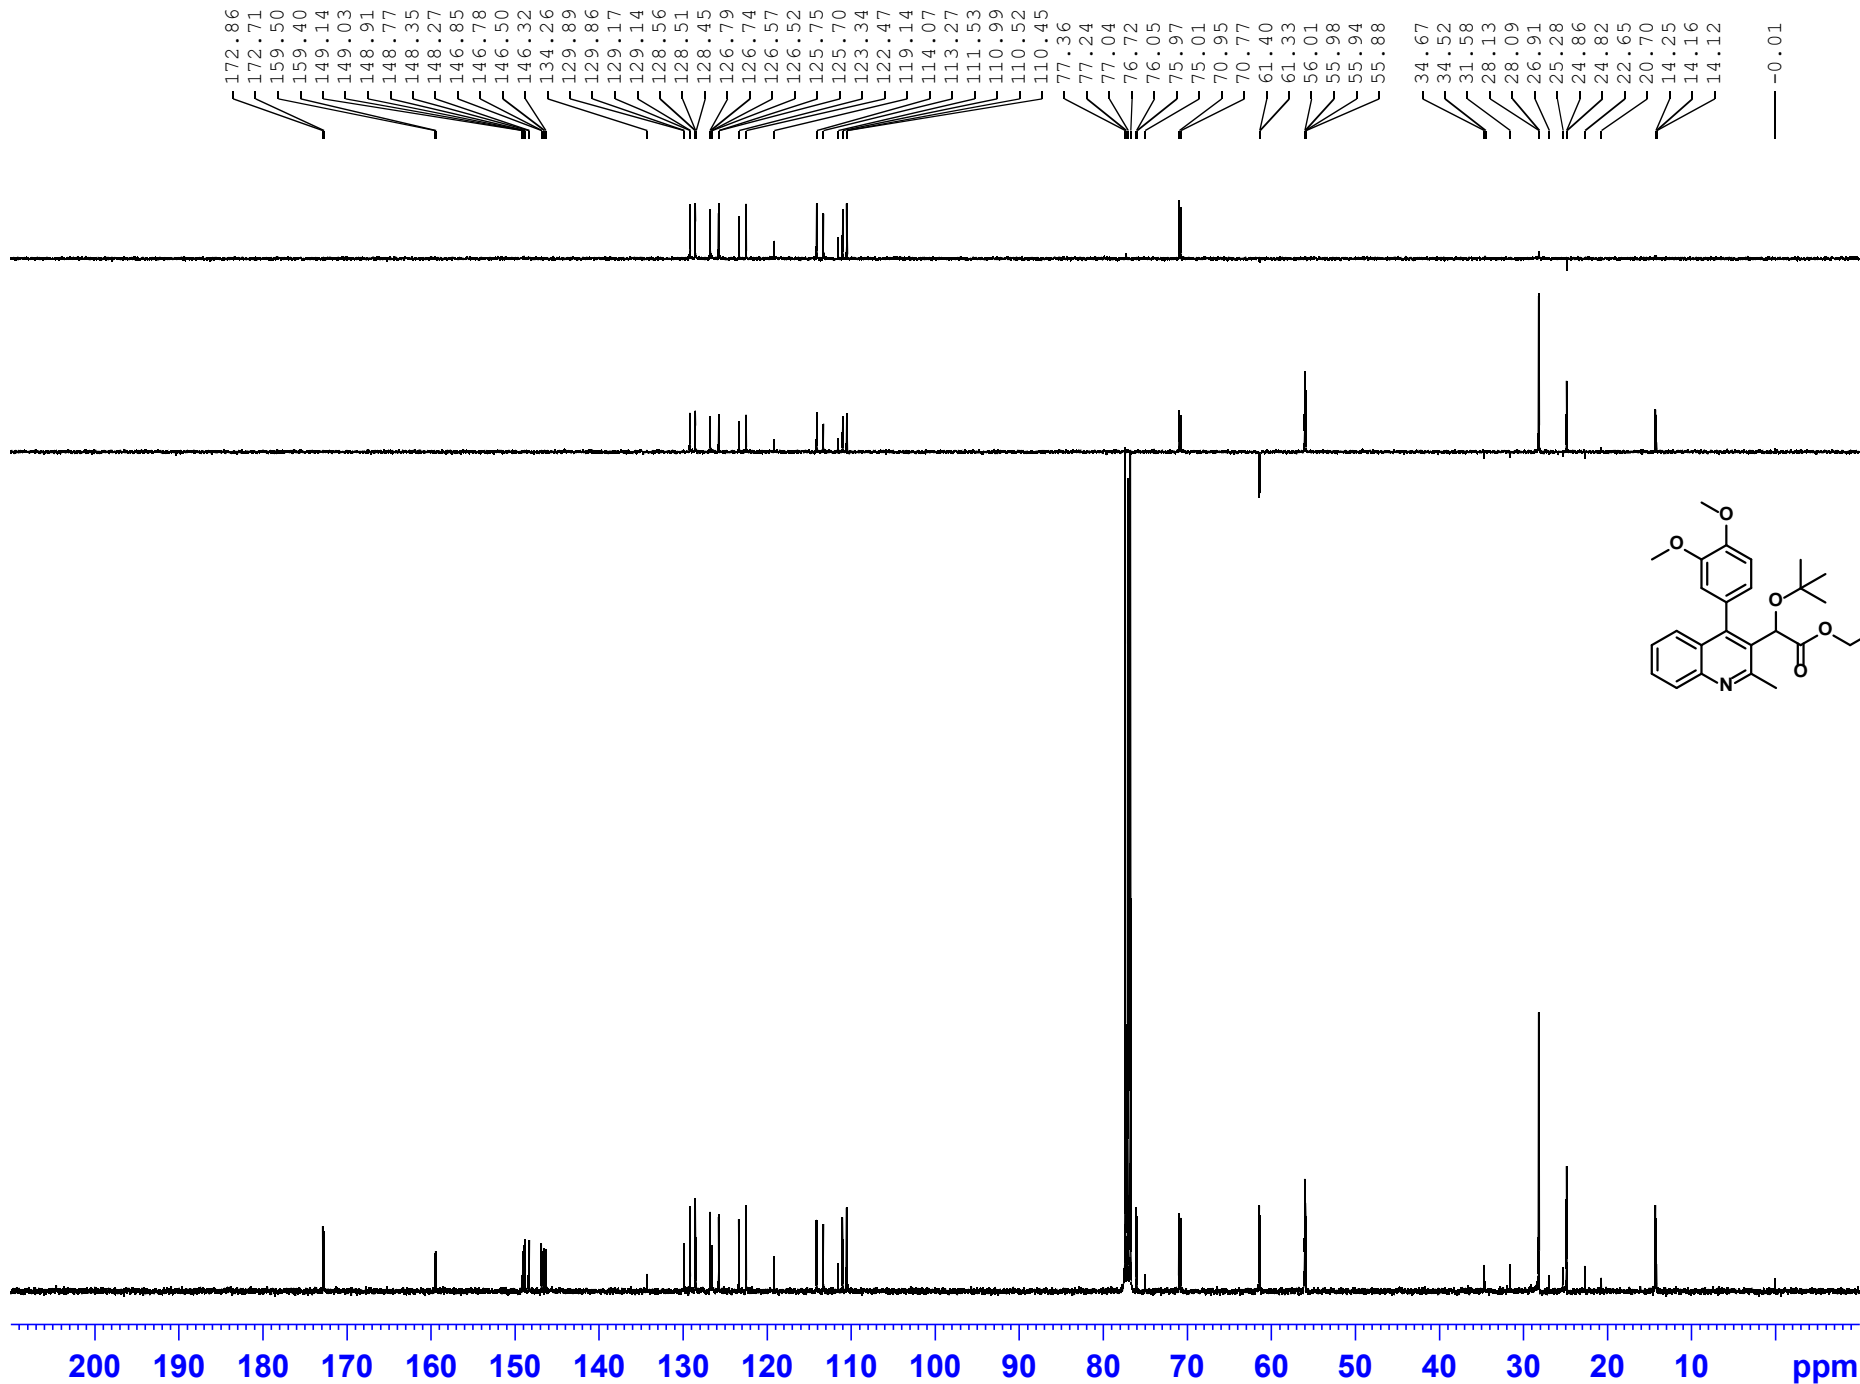



NGJ-9-021 (CDC13, 400 MHz) Pure Clear Oil - saponification of 4-phenylquinoline; post-neutral:

```

NAME      NGJ-9-021
EXPNO     30
PROCNO    1
Date_     20171219
Time      16.43 h
INSTRUM   spect
PROBHD    Z108618_0161 (
PULPROG   zg30
TD        65536
SOLVENT   CDC13
NS        16
DS        2
SWH       8012.820 Hz
FIDRES    0.244532 Hz
AQ        4.0894966 sec
RG        161
DW        62.400 usec
DE        6.50 usec
TE        298.4 K
D1        1.00000000 sec
TD0       1
SF01      400.1724710 MHz
NUC1      1H
P1        9.88 usec
SI        65536
SF        400.1700089 MHz
WDW       EM
SSB       0
LB        0.30 Hz
GB        0
PC        1.00
    
```

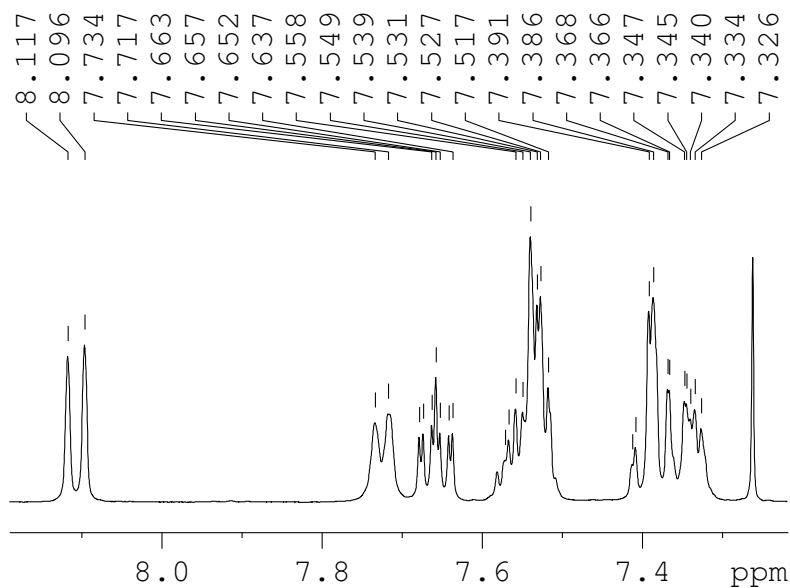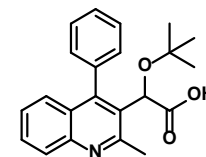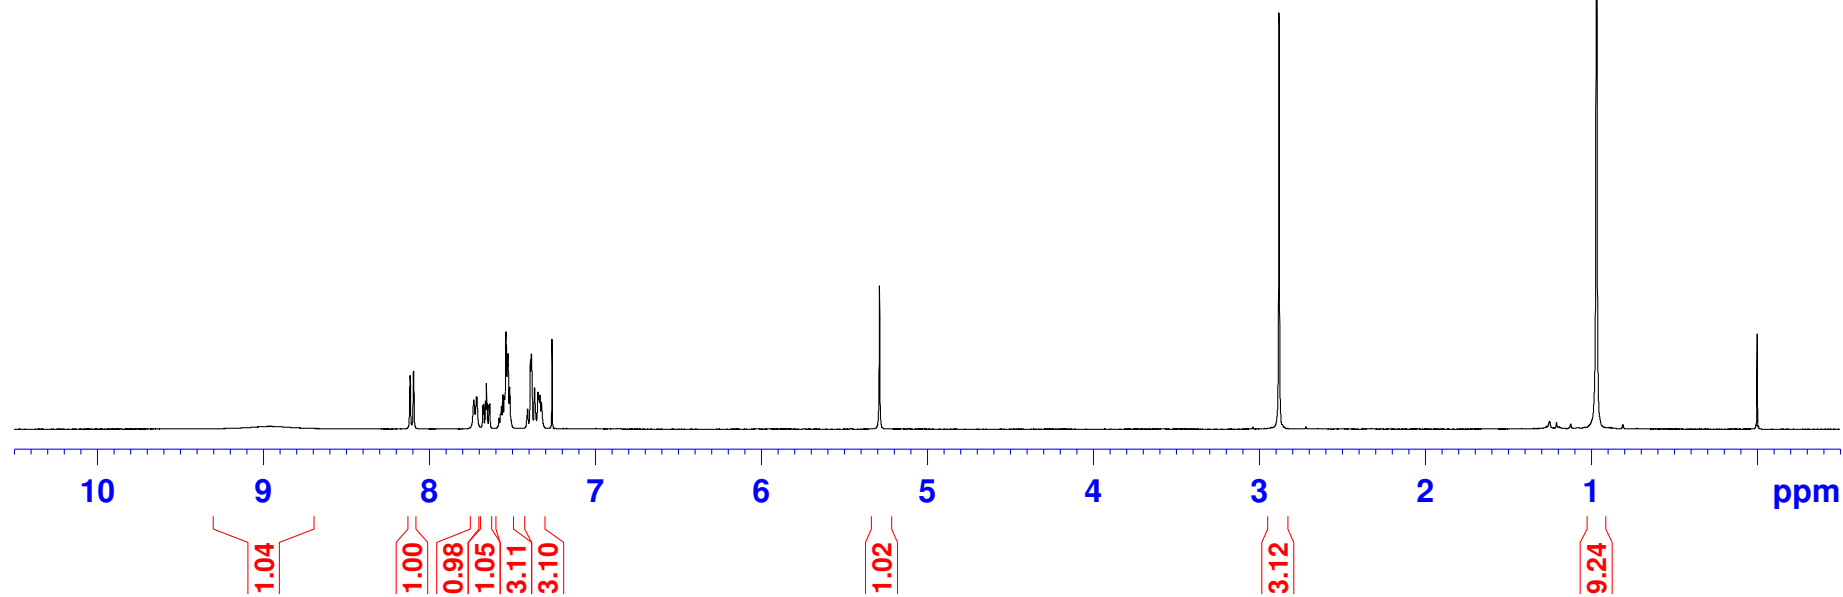

NGJ-9-021 (CDCl<sub>3</sub>, 400 MHz) Pure Clear Oil - saponification of 4-phenylquinoline; post-neutralization

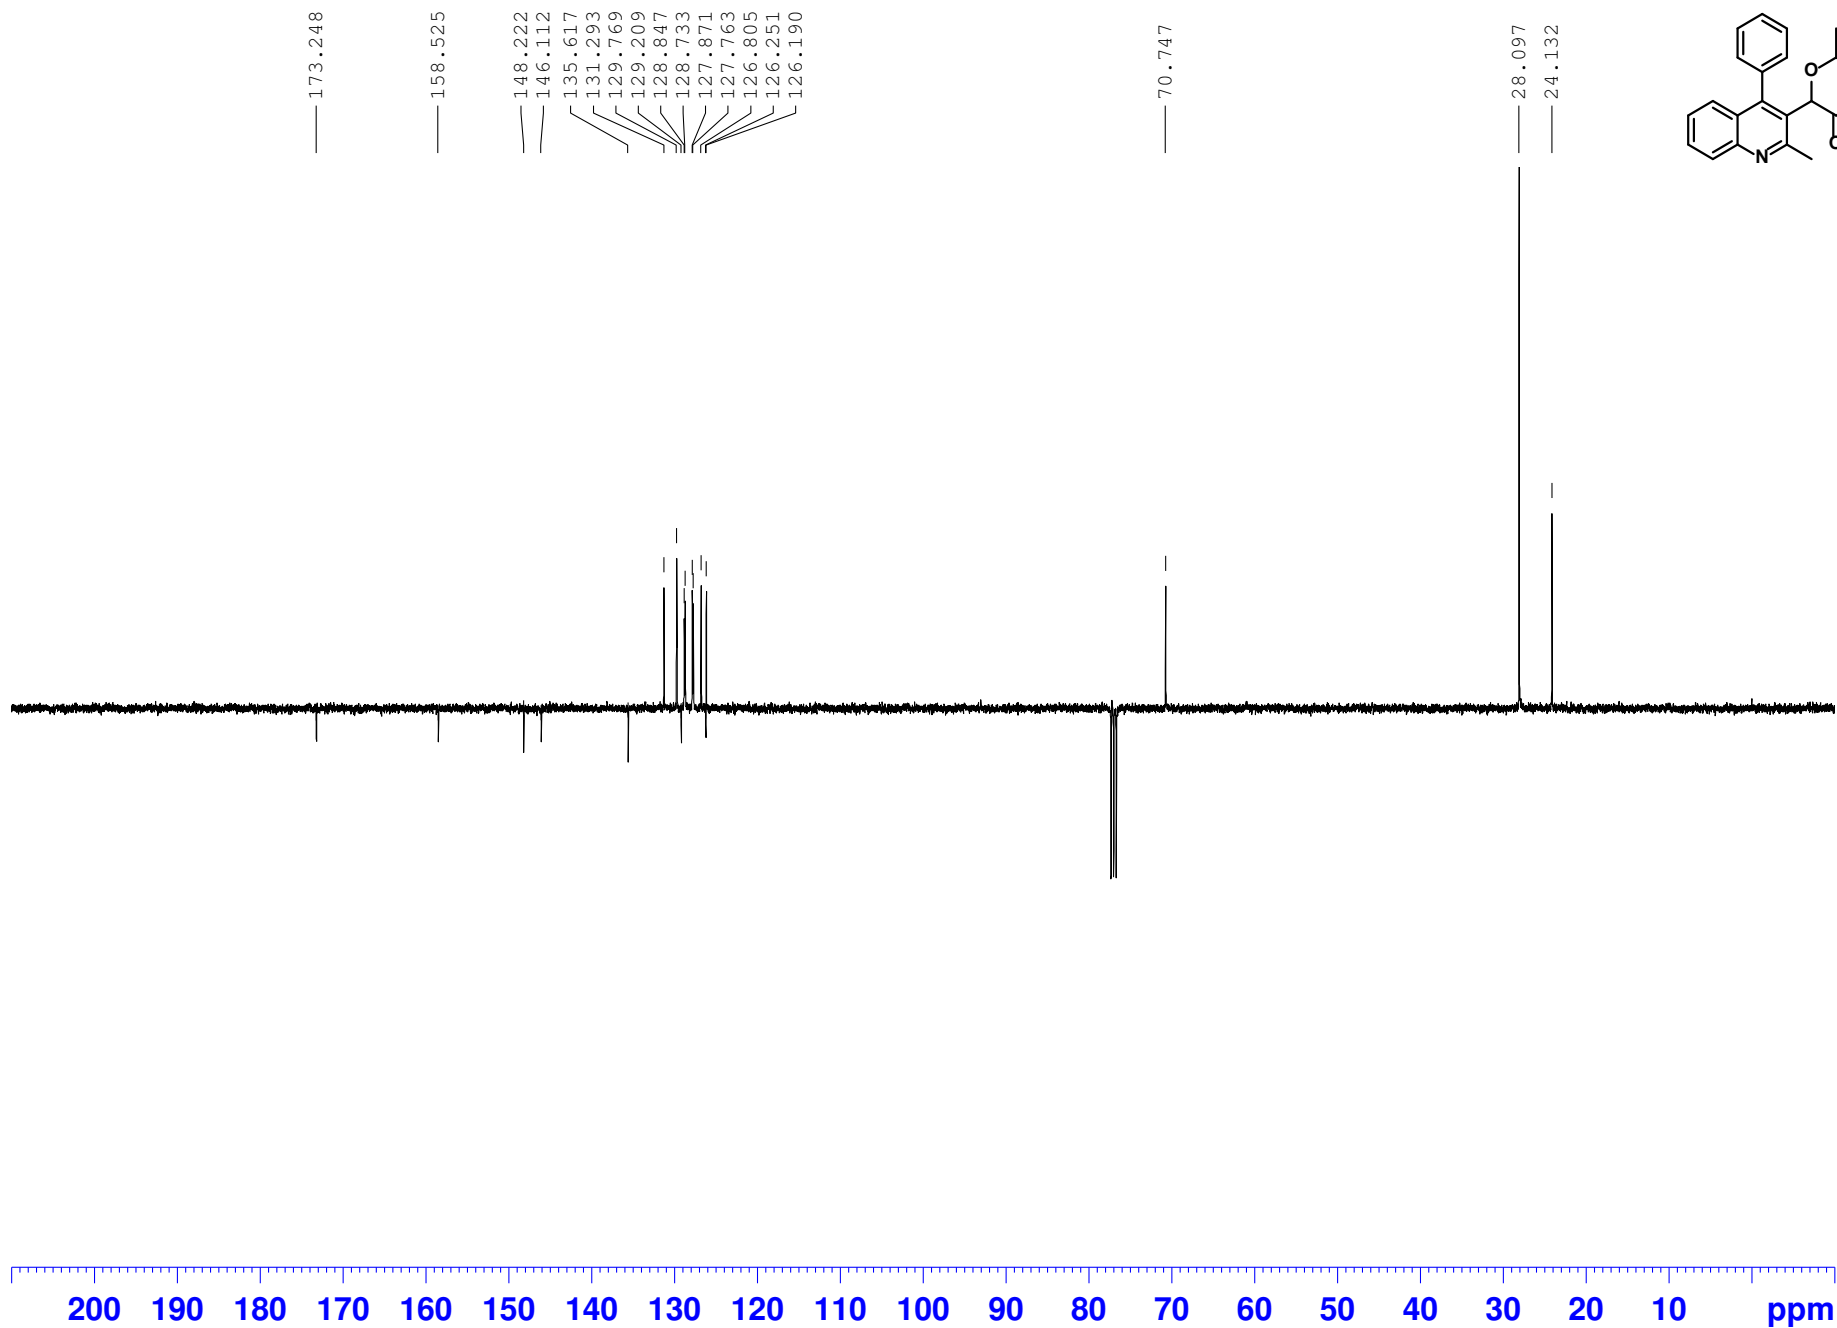

NGJ-7-060 (CDC13, 400 MHz) Pure White Solid - saponification of ester quinoline



NAME NGJ-7-060  
EXPNO 30  
PROCNO 1  
Date\_ 20170518  
Time\_ 20.25 h  
INSTRUM spect  
PROBHD Z108618\_0161 (  
PULPROG zg30  
TD 65536  
SOLVENT CDC13  
NS 32  
DS 2  
SWH 8012.820 Hz  
FIDRES 0.244532 Hz  
AQ 4.0894966 sec  
RG 203  
DW 62.400 usec  
DE 6.50 usec  
TE 297.6 K  
D1 1.00000000 sec  
TD0 1  
SF01 400.1724710 MHz  
NUC1 1H  
P1 9.88 usec  
SI 65536  
SF 400.1700085 MHz  
WDW EM  
SSB 0  
LB 0.30 Hz  
GB 0  
PC 1.00

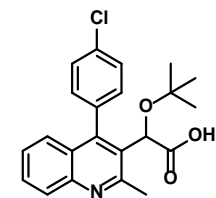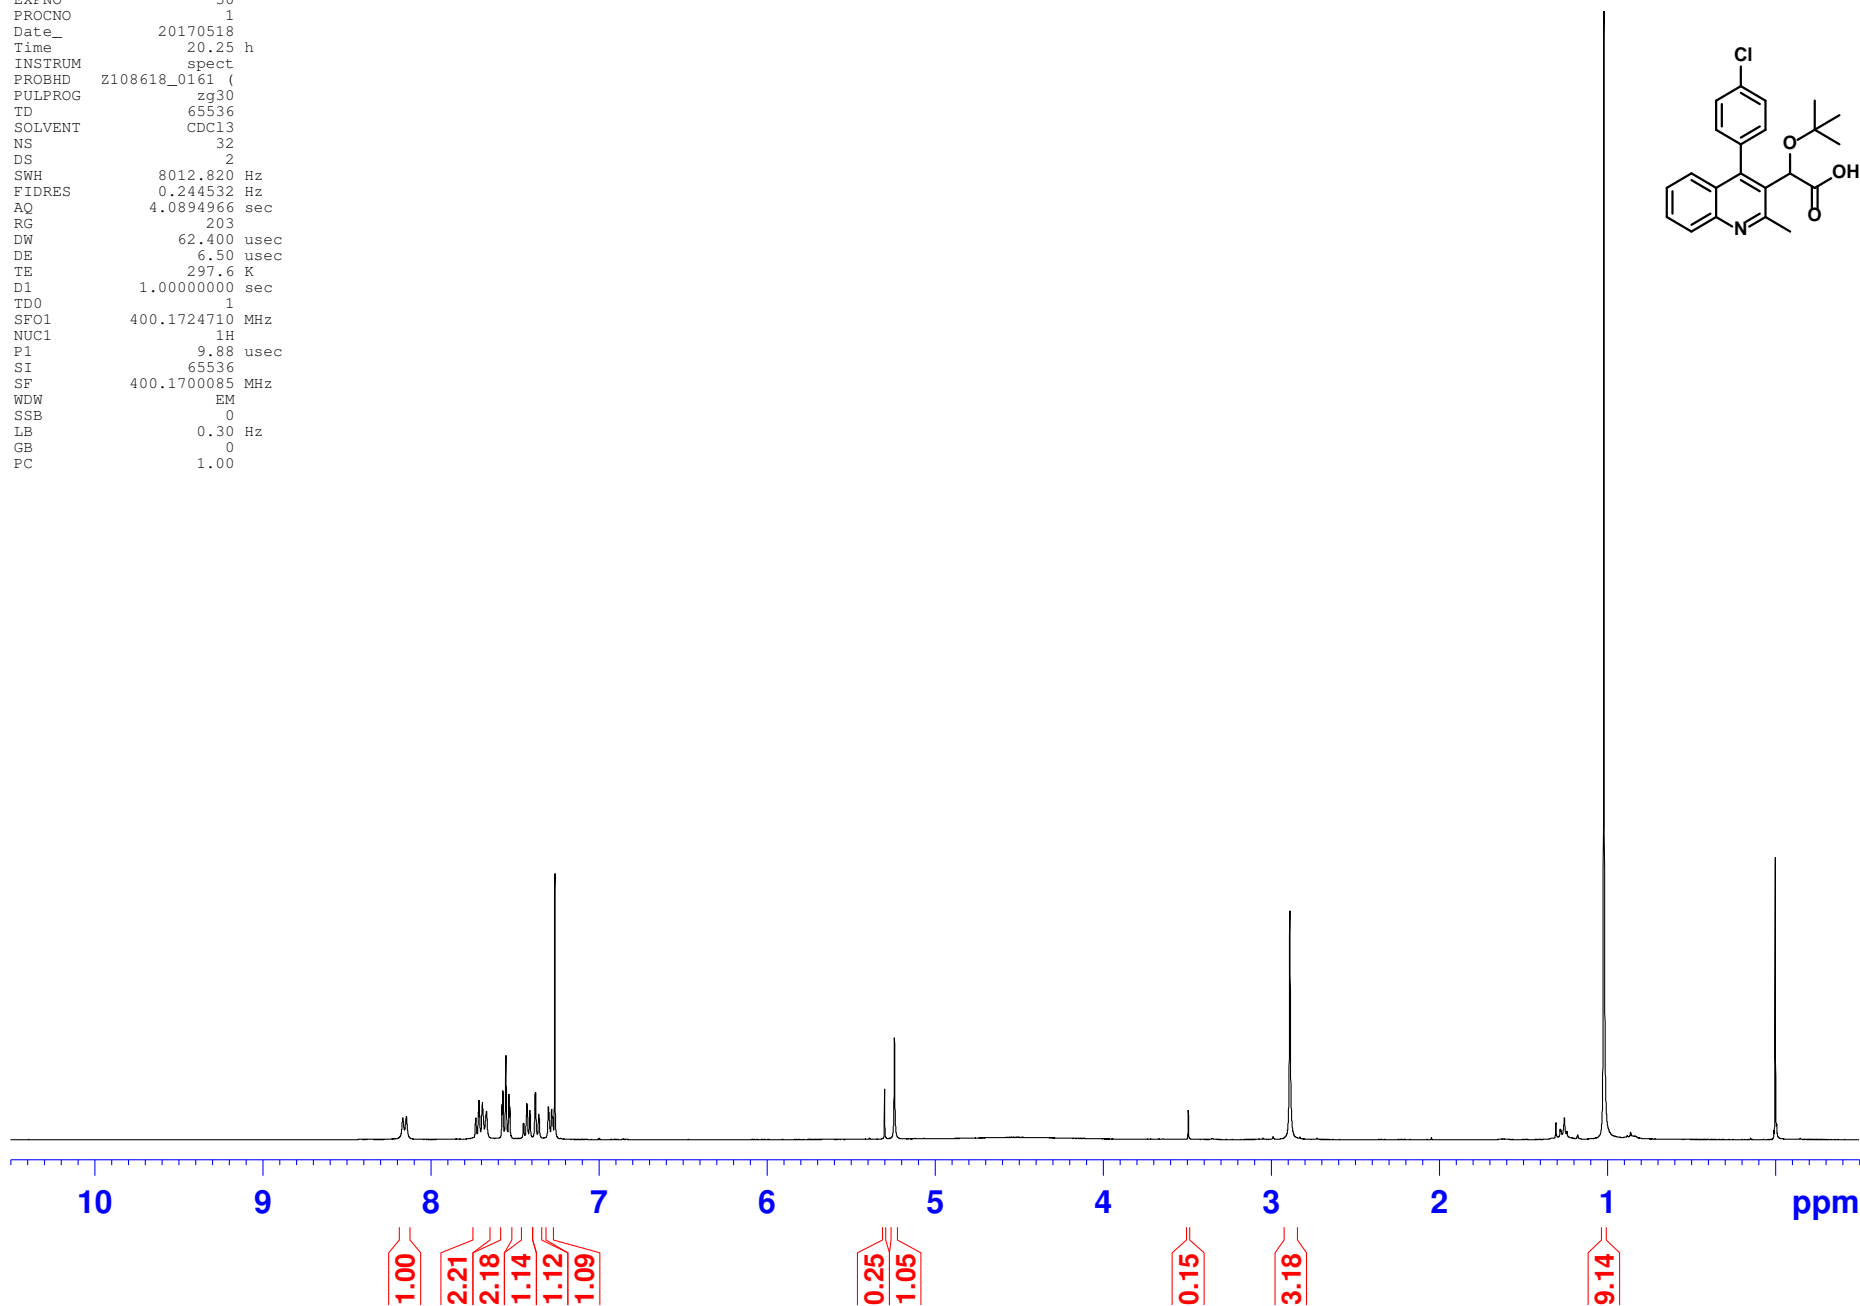

NGJ-7-060 (CDCl<sub>3</sub>, 400 MHz) Pure White Solid - saponification c

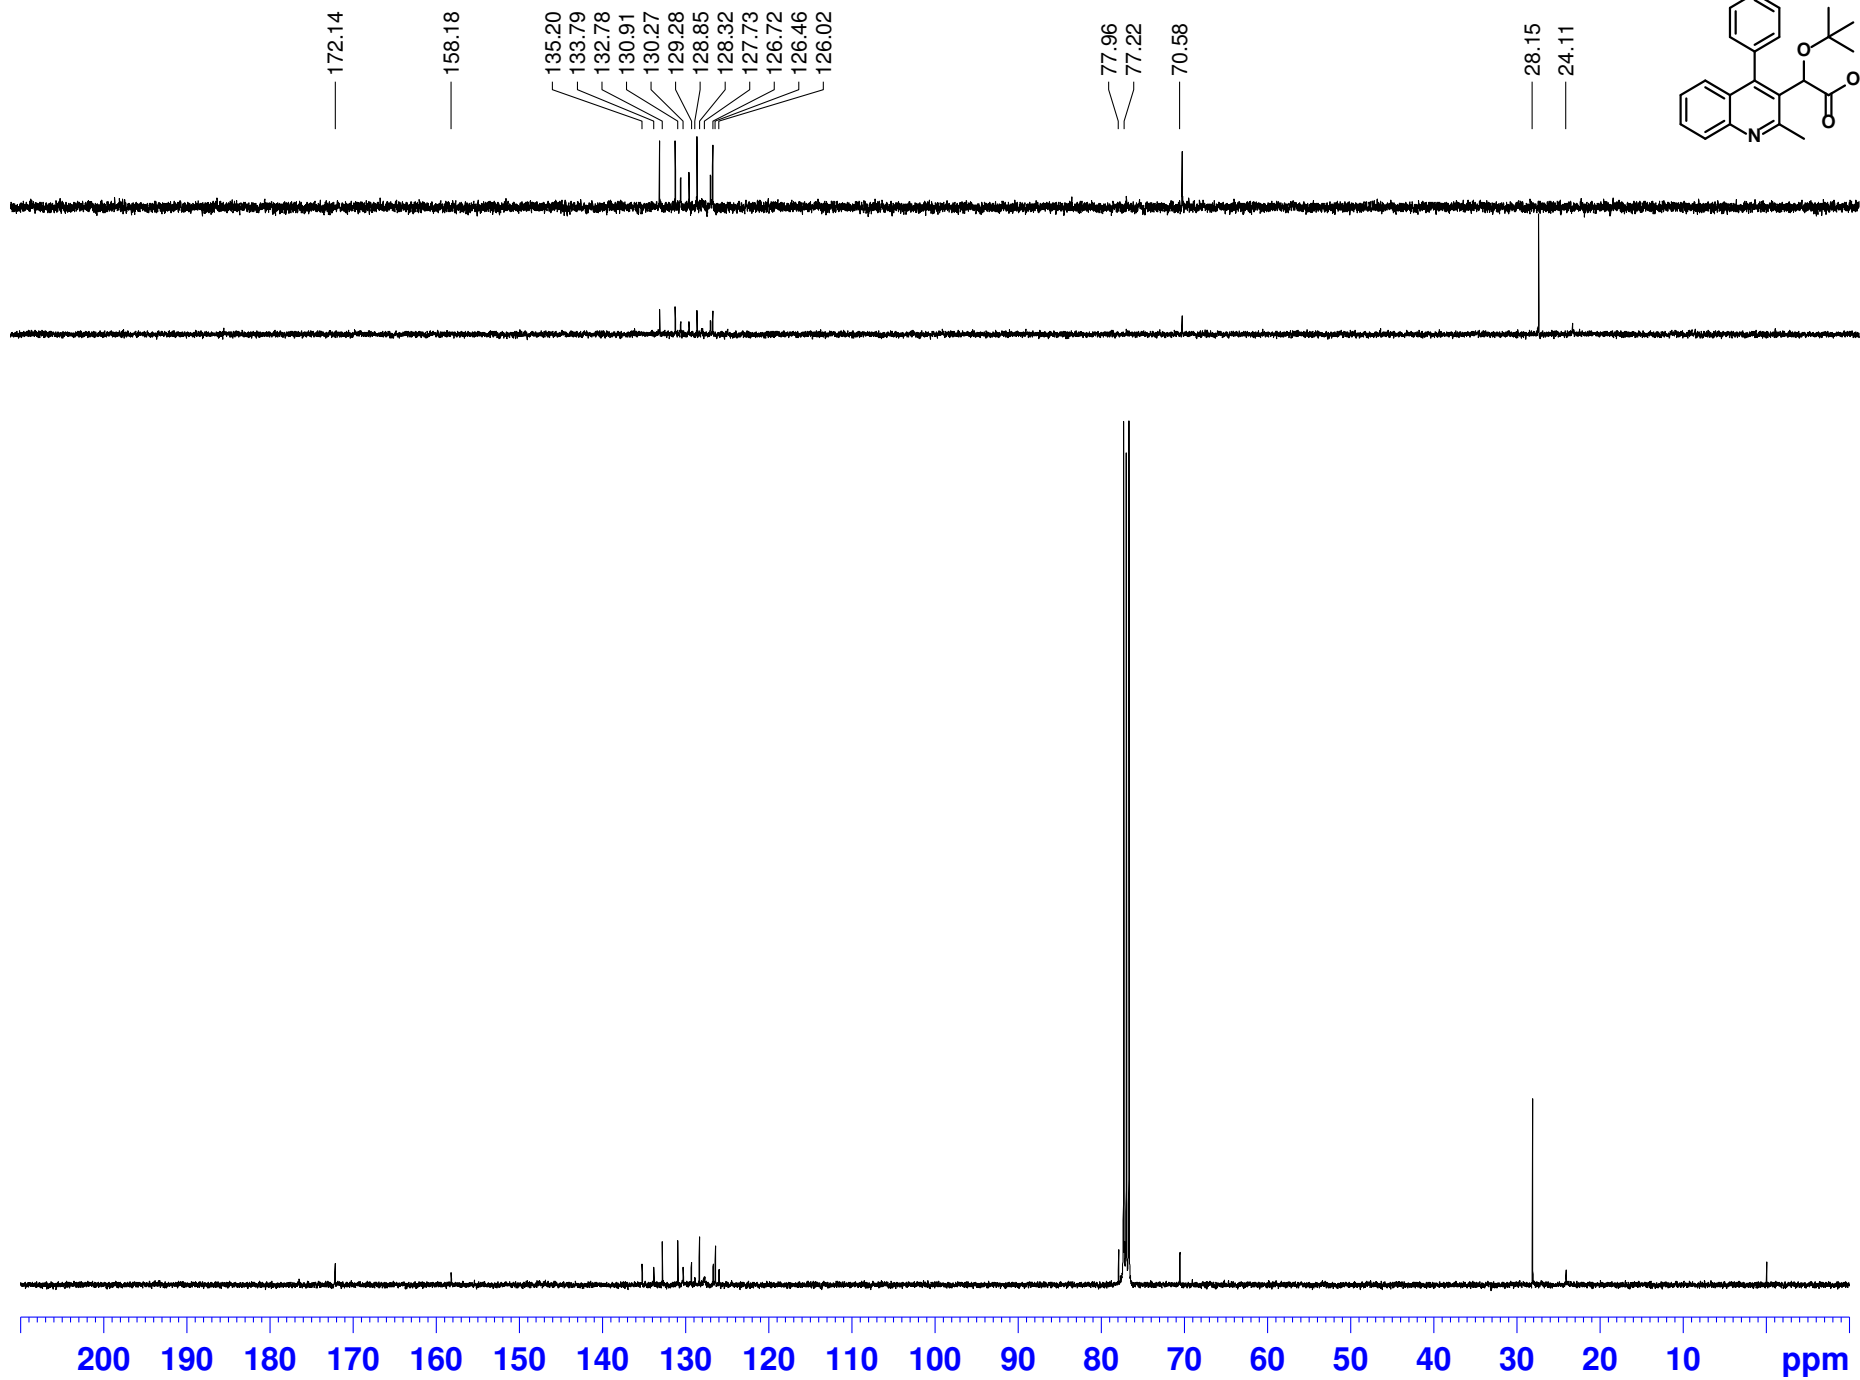

# Mass Spectrum List Report

## Analysis Info

Analysis Name F:\MS1-091514 - 080917\Data\apexdata031918\NGJ-7-060\_pos\_000001.d  
Method  
Sample Name NGJ-7-060  
Comment NGJ-7-060 in THF:MeOH C22H22ClNO3 H+

Acquisition Date 3/19/2018 12:08:06 PM  
Operator FTMS\_USER  
Instrument apex-Qe

Sample Name NGJ-7-060 in THF:MeOH  
Exact Mass of C22H22ClNO3 H+ = 384.136098 m/z  
Mass Observed = 384.136414 m/z

Difference < 1.0 ppm

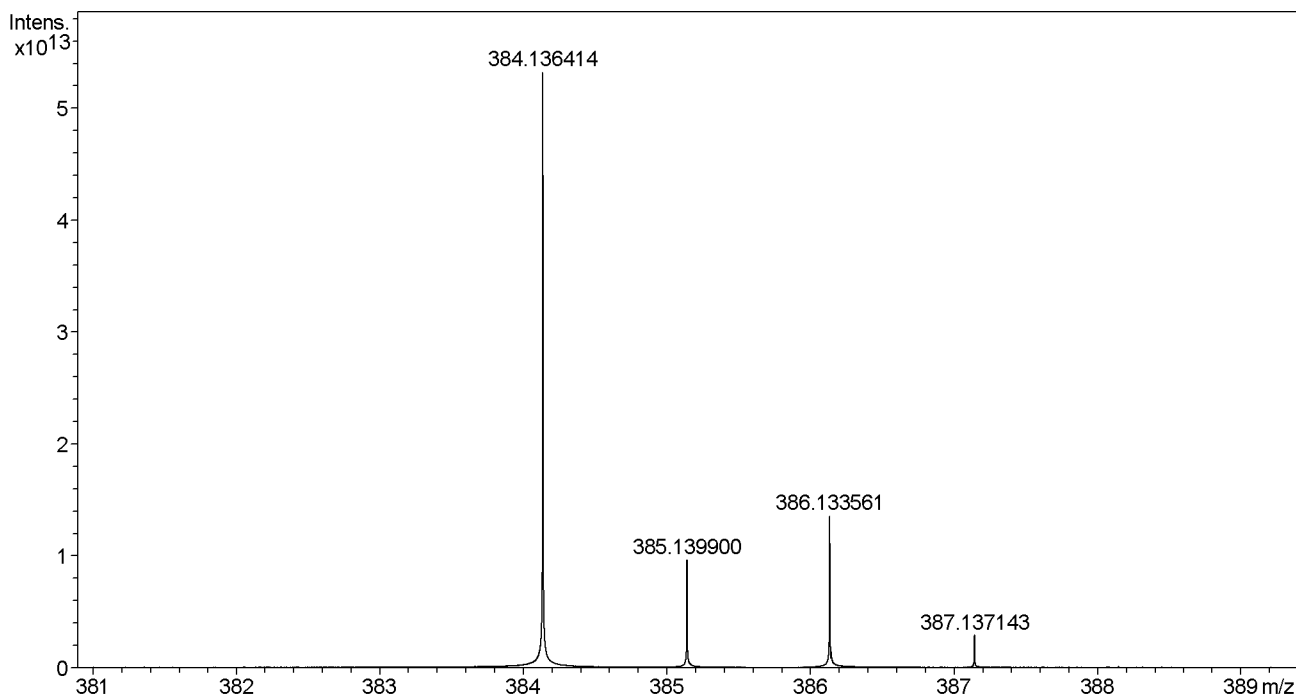

| #  | m/z        | I            |
|----|------------|--------------|
| 1  | 184.561401 | 21388630843  |
| 2  | 184.654214 | 22690279700  |
| 3  | 186.059464 | 21390935505  |
| 4  | 186.771490 | 21044178947  |
| 5  | 187.514591 | 22620291972  |
| 6  | 187.633819 | 25531528465  |
| 7  | 189.070049 | 22430880694  |
| 8  | 189.270012 | 21086502667  |
| 9  | 189.577568 | 22396779448  |
| 10 | 189.685336 | 35678851293  |
| 11 | 189.958190 | 21114067374  |
| 12 | 190.061543 | 100417214097 |
| 13 | 190.926723 | 21663734232  |
| 14 | 192.071089 | 456822191468 |
| 15 | 192.080898 | 26487592554  |
| 16 | 192.570059 | 25118277958  |
| 17 | 192.572886 | 73679980936  |
| 18 | 193.066904 | 30223676861  |
| 19 | 193.069715 | 69164080616  |
| 20 | 193.962032 | 24451331299  |

---

# Mass Spectrum List Report

---

| #  | m/z        | I            |
|----|------------|--------------|
| 21 | 194.644604 | 22452094652  |
| 22 | 194.995028 | 21602038223  |
| 23 | 195.001061 | 21005657480  |
| 24 | 196.061242 | 21368354491  |
| 25 | 196.075727 | 24116008390  |
| 26 | 200.407328 | 21010639825  |
| 27 | 200.912673 | 23669856723  |
| 28 | 201.119355 | 21576610707  |
| 29 | 201.884797 | 25868850582  |
| 30 | 202.333255 | 21695291243  |
| 31 | 202.340491 | 195524968198 |
| 32 | 203.082521 | 22189958476  |
| 33 | 203.570082 | 21344203429  |
| 34 | 206.096392 | 20987577954  |
| 35 | 206.965657 | 21207010274  |
| 36 | 209.442007 | 65382977614  |
| 37 | 210.769443 | 21761440202  |
| 38 | 211.368721 | 21446125190  |
| 39 | 211.910236 | 22464042237  |
| 40 | 212.794578 | 21360998986  |
| 41 | 213.992894 | 23742464843  |
| 42 | 214.065060 | 28158915807  |
| 43 | 216.080893 | 24781486152  |
| 44 | 217.674438 | 21794583697  |
| 45 | 218.096365 | 22598418388  |
| 46 | 225.468756 | 21910446026  |
| 47 | 229.083621 | 22531440225  |
| 48 | 229.088599 | 24076344896  |
| 49 | 231.099751 | 22951691530  |
| 50 | 231.104350 | 39583931559  |
| 51 | 231.169345 | 24940002786  |
| 52 | 233.033156 | 21291683808  |
| 53 | 235.895778 | 24547286356  |
| 54 | 251.723888 | 24913544816  |
| 55 | 253.163471 | 21663127851  |
| 56 | 261.389462 | 22365499380  |
| 57 | 263.102950 | 21929882005  |
| 58 | 263.311315 | 21866752893  |
| 59 | 263.585336 | 22584677865  |
| 60 | 265.065698 | 26437511269  |
| 61 | 265.839187 | 22177191160  |
| 62 | 266.073080 | 50412517289  |
| 63 | 267.044770 | 27706514887  |
| 64 | 268.312735 | 43935383696  |
| 65 | 275.173360 | 21272900667  |
| 66 | 278.298220 | 22160023637  |
| 67 | 280.598549 | 24455725515  |
| 68 | 281.737666 | 21538040222  |
| 69 | 282.068201 | 83354423011  |
| 70 | 283.071645 | 24129505887  |
| 71 | 283.563502 | 31042149425  |
| 72 | 283.648494 | 22362103829  |
| 73 | 284.065120 | 83164101989  |
| 74 | 284.083624 | 25181322214  |
| 75 | 285.248655 | 22251175722  |
| 76 | 285.274220 | 22151559519  |
| 77 | 286.518468 | 22364818154  |
| 78 | 288.193251 | 24245226796  |
| 79 | 296.047384 | 21155976612  |
| 80 | 296.345477 | 25417870813  |
| 81 | 299.070948 | 21271835244  |
| 82 | 299.789605 | 23819953587  |
| 83 | 300.857501 | 22324817059  |
| 84 | 301.752660 | 21723616650  |

---

# Mass Spectrum List Report

---

| #   | m/z        | I             |
|-----|------------|---------------|
| 85  | 302.600388 | 22373633497   |
| 86  | 308.572788 | 22144187922   |
| 87  | 322.282123 | 33048958823   |
| 88  | 324.387700 | 125436472104  |
| 89  | 326.510815 | 149496060153  |
| 90  | 327.246376 | 22729245176   |
| 91  | 327.963457 | 29175803699   |
| 92  | 328.073920 | 45256836808   |
| 93  | 328.653064 | 30324105471   |
| 94  | 328.694657 | 1502022904019 |
| 95  | 329.076952 | 28992353670   |
| 96  | 330.070336 | 43308792433   |
| 97  | 340.146847 | 1685755825096 |
| 98  | 340.233694 | 23895542013   |
| 99  | 341.150306 | 158727601169  |
| 100 | 342.144054 | 334301085901  |
| 101 | 343.147525 | 37382501170   |
| 102 | 349.166594 | 24831556019   |
| 103 | 353.312694 | 24857767195   |
| 104 | 375.178460 | 27023369552   |
| 105 | 379.101704 | 25680473945   |
| 106 | 379.273018 | 26886876599   |
| 107 | 379.328266 | 27378409181   |
| 108 | 379.552354 | 26438805881   |
| 109 | 380.446709 | 26672269492   |
| 110 | 380.664650 | 25481213641   |
| 111 | 380.827973 | 26601957099   |
| 112 | 380.943276 | 25977709157   |
| 113 | 381.010736 | 29418599551   |
| 114 | 381.105719 | 26364148274   |
| 115 | 381.237897 | 31900070486   |
| 116 | 381.317545 | 27912362739   |
| 117 | 381.365910 | 36266601807   |
| 118 | 381.393019 | 25712413913   |
| 119 | 381.429669 | 25452953377   |
| 120 | 381.470601 | 30422917468   |
| 121 | 381.530378 | 25687990830   |
| 122 | 381.564267 | 29228416333   |
| 123 | 381.666445 | 28264146894   |
| 124 | 381.686875 | 28476457082   |
| 125 | 381.742860 | 25717684009   |
| 126 | 381.773940 | 29846075928   |
| 127 | 381.797210 | 26624628334   |
| 128 | 381.812706 | 26149695576   |
| 129 | 381.847947 | 28955605769   |
| 130 | 381.860693 | 30915130323   |
| 131 | 381.918798 | 27588352469   |
| 132 | 382.031865 | 28163192821   |
| 133 | 382.065494 | 30605131814   |
| 134 | 382.137117 | 34761195164   |
| 135 | 382.160251 | 39754801728   |
| 136 | 382.201437 | 35301260043   |
| 137 | 382.220031 | 34505376249   |
| 138 | 382.315806 | 32247266069   |
| 139 | 382.396603 | 33493015132   |
| 140 | 382.437325 | 35332227117   |
| 141 | 382.488177 | 36376908645   |
| 142 | 382.531412 | 33716222387   |
| 143 | 382.547896 | 35593193990   |
| 144 | 382.616234 | 41308148778   |
| 145 | 382.661836 | 39622763884   |
| 146 | 382.718795 | 39003583095   |
| 147 | 382.743764 | 41505956093   |
| 148 | 382.822374 | 42755079728   |

---

# Mass Spectrum List Report

---

| #   | m/z        | I              |
|-----|------------|----------------|
| 149 | 382.858395 | 42411877599    |
| 150 | 382.894478 | 49808997992    |
| 151 | 382.972925 | 48282776841    |
| 152 | 383.051710 | 47502597045    |
| 153 | 383.067031 | 45647302959    |
| 154 | 383.106033 | 46217904593    |
| 155 | 383.128886 | 59893081276    |
| 156 | 383.165084 | 49669900825    |
| 157 | 383.183784 | 52540844777    |
| 158 | 383.268285 | 56143661859    |
| 159 | 383.339096 | 56111908828    |
| 160 | 383.352430 | 62778558598    |
| 161 | 383.380405 | 61207888941    |
| 162 | 383.473632 | 68032331156    |
| 163 | 383.509215 | 73984995450    |
| 164 | 383.576311 | 80346528176    |
| 165 | 383.604481 | 80930333821    |
| 166 | 383.629231 | 82549758491    |
| 167 | 383.661848 | 911111015483   |
| 168 | 383.718218 | 98571969151    |
| 169 | 383.743530 | 104635499346   |
| 170 | 384.136414 | 53256046967200 |
| 171 | 384.488540 | 95302642015    |
| 172 | 384.523124 | 87486101128    |
| 173 | 384.673463 | 60302209898    |
| 174 | 384.687672 | 57131578262    |
| 175 | 384.731899 | 50401373452    |
| 176 | 384.741993 | 49588181921    |
| 177 | 384.771232 | 47275652086    |
| 178 | 384.798090 | 48817154799    |
| 179 | 384.827401 | 43421605575    |
| 180 | 384.866927 | 41531616533    |
| 181 | 384.901624 | 44419071404    |
| 182 | 385.036116 | 67313007338    |
| 183 | 385.139900 | 9681696952431  |
| 184 | 385.258098 | 71643651978    |
| 185 | 385.289485 | 66831344759    |
| 186 | 385.356578 | 53202093400    |
| 187 | 385.425853 | 40601023346    |
| 188 | 385.503977 | 35254652134    |
| 189 | 385.513204 | 33326834001    |
| 190 | 385.543202 | 30531161665    |
| 191 | 385.622155 | 26112140073    |
| 192 | 385.979156 | 58725946682    |
| 193 | 386.133561 | 13630889677465 |
| 194 | 386.143948 | 1354497091044  |
| 195 | 386.302402 | 93103984224    |
| 196 | 386.412732 | 60205108153    |
| 197 | 386.495876 | 60790860396    |
| 198 | 386.552517 | 58073902882    |
| 199 | 386.567013 | 47445336506    |
| 200 | 386.626639 | 46642839507    |
| 201 | 386.655076 | 42953038035    |
| 202 | 386.764245 | 38129549260    |
| 203 | 386.828436 | 35414737395    |
| 204 | 386.855756 | 30837865463    |
| 205 | 386.931931 | 36143015989    |
| 206 | 386.953815 | 32046562934    |
| 207 | 387.005556 | 31143879865    |
| 208 | 387.023281 | 29214177040    |
| 209 | 387.066048 | 29131510311    |
| 210 | 387.137143 | 2947394813589  |
| 211 | 387.256634 | 46120778221    |
| 212 | 387.303975 | 45049650996    |



---

# Mass Spectrum List Report

---

| #   | m/z        | I             |
|-----|------------|---------------|
| 213 | 387.329898 | 38425582124   |
| 214 | 387.362607 | 37620887296   |
| 215 | 387.455045 | 35305145143   |
| 216 | 387.486399 | 34711899892   |
| 217 | 387.532752 | 36507719570   |
| 218 | 387.555065 | 31343649435   |
| 219 | 387.615706 | 35753472566   |
| 220 | 387.646090 | 30090253419   |
| 221 | 387.730214 | 33348584270   |
| 222 | 387.742246 | 29484430476   |
| 223 | 387.751906 | 29704822126   |
| 224 | 387.774640 | 27916742917   |
| 225 | 387.797613 | 29468632601   |
| 226 | 387.854126 | 36436966037   |
| 227 | 387.882080 | 31053264146   |
| 228 | 387.914978 | 26341398181   |
| 229 | 387.966408 | 25628943003   |
| 230 | 387.985390 | 25361417177   |
| 231 | 388.038398 | 28236078396   |
| 232 | 388.060627 | 31093656027   |
| 233 | 388.077820 | 30732543520   |
| 234 | 388.140917 | 107409943189  |
| 235 | 388.165358 | 27593842207   |
| 236 | 388.238048 | 26092081396   |
| 237 | 388.265965 | 29295938728   |
| 238 | 388.308575 | 29890674893   |
| 239 | 388.332429 | 28483429274   |
| 240 | 388.343197 | 27589924208   |
| 241 | 388.441677 | 30428322691   |
| 242 | 388.509350 | 30118145693   |
| 243 | 388.548305 | 26754887827   |
| 244 | 388.717519 | 26071543889   |
| 245 | 388.753912 | 25512777845   |
| 246 | 388.869405 | 26132609382   |
| 247 | 388.898563 | 25421790703   |
| 248 | 388.934854 | 26131926264   |
| 249 | 389.199278 | 28696304584   |
| 250 | 389.221085 | 27827800969   |
| 251 | 389.289840 | 26428277499   |
| 252 | 389.301856 | 26003027602   |
| 253 | 389.969540 | 26313678231   |
| 254 | 390.368178 | 28301249944   |
| 255 | 398.242419 | 202373015000  |
| 256 | 406.118954 | 231547817982  |
| 257 | 410.304991 | 25479231069   |
| 258 | 428.098445 | 35849252044   |
| 259 | 428.100901 | 159702776245  |
| 260 | 428.419033 | 23487682140   |
| 261 | 429.104689 | 37477879508   |
| 262 | 435.343321 | 23089650784   |
| 263 | 447.038595 | 23291545451   |
| 264 | 462.076123 | 47271426644   |
| 265 | 480.551697 | 92704077078   |
| 266 | 481.102204 | 23467611819   |
| 267 | 481.554951 | 30653998143   |
| 268 | 484.379715 | 23953599208   |
| 269 | 497.622895 | 23245439874   |
| 270 | 503.725783 | 22740612068   |
| 271 | 508.582854 | 1412332414123 |
| 272 | 508.672849 | 26162004705   |
| 273 | 508.688845 | 24437166998   |
| 274 | 509.502538 | 23325776567   |
| 275 | 509.586425 | 345909785626  |
| 276 | 510.590131 | 31647196884   |

---

# Mass Spectrum List Report

---

| #   | m/z        | I             |
|-----|------------|---------------|
| 277 | 522.599094 | 37091010216   |
| 278 | 523.566223 | 22726149111   |
| 279 | 534.598814 | 24410683282   |
| 280 | 534.976023 | 25405217050   |
| 281 | 536.082488 | 24285921953   |
| 282 | 536.119361 | 25924784186   |
| 283 | 536.168641 | 24375691613   |
| 284 | 536.225197 | 24841425432   |
| 285 | 536.614088 | 5531971080102 |
| 286 | 536.955288 | 32065620331   |
| 287 | 536.984870 | 32452753823   |
| 288 | 537.049772 | 31265648193   |
| 289 | 537.073668 | 30686528693   |
| 290 | 537.286586 | 29318008365   |
| 291 | 537.510119 | 44483409120   |
| 292 | 537.617610 | 1838632918845 |
| 293 | 538.621220 | 198439987581  |
| 294 | 550.593807 | 29318398951   |
| 295 | 552.609648 | 68274040033   |
| 296 | 553.612897 | 29017400678   |
| 297 | 563.365113 | 26173222242   |
| 298 | 564.479092 | 25553066428   |
| 299 | 564.579009 | 45482244090   |
| 300 | 564.645727 | 1485695661014 |
| 301 | 565.649283 | 451024776649  |
| 302 | 566.652924 | 36955735618   |
| 303 | 568.592837 | 23097818940   |
| 304 | 569.404585 | 23660829732   |
| 305 | 572.560894 | 23983661699   |
| 306 | 574.210486 | 24233004236   |
| 307 | 592.476360 | 25883904556   |
| 308 | 592.677144 | 1817092120555 |
| 309 | 592.783197 | 36406401517   |
| 310 | 592.845787 | 35278667757   |
| 311 | 593.680633 | 678187817301  |
| 312 | 594.684179 | 65282981125   |
| 313 | 602.654392 | 25212504198   |
| 314 | 607.071775 | 23285591446   |
| 315 | 608.673265 | 28005737161   |
| 316 | 613.430983 | 26635658107   |
| 317 | 620.709216 | 43274532056   |
| 318 | 662.759933 | 23566555439   |
| 319 | 665.155105 | 26135944572   |
| 320 | 666.101271 | 22973552541   |
| 321 | 666.424280 | 23007900344   |
| 322 | 677.843898 | 23040739965   |
| 323 | 685.438383 | 72086164525   |
| 324 | 686.442240 | 25236573521   |
| 325 | 703.574240 | 28056164567   |
| 326 | 721.993936 | 23103373760   |
| 327 | 747.492421 | 23594531930   |
| 328 | 751.838450 | 23134526334   |
| 329 | 787.006136 | 25042004610   |
| 330 | 835.234466 | 27309963016   |
| 331 | 848.875249 | 24050270778   |
| 332 | 896.434789 | 25094066850   |
| 333 | 951.668865 | 25066042742   |
| 334 | 952.226387 | 27735249944   |

NGJ-8-100 characterization (400MHz, CDCl3)

```

NAME      NGJ-8-100
EXPNO     40
PROCNO    1
Date_     20171201
Time      18.47 h
INSTRUM   spect
PROBHD    Z108618_0161 (
PULPROG   zg30
TD         65536
FIDRES    0.244532 Hz
AQ         4.0894966 sec
RG         90.5
DW         62.400 usec
DE         6.50 usec
TE         298.2 K
D1         1.00000000 sec
TD0        1
SF01      400.1724710 MHz
NUC1       1H
P1         9.88 usec
SI         65536
SF         400.1700075 MHz
WDW        EM
SSB        0
LB         0.30 Hz
GB         0
PC         1.00
    
```

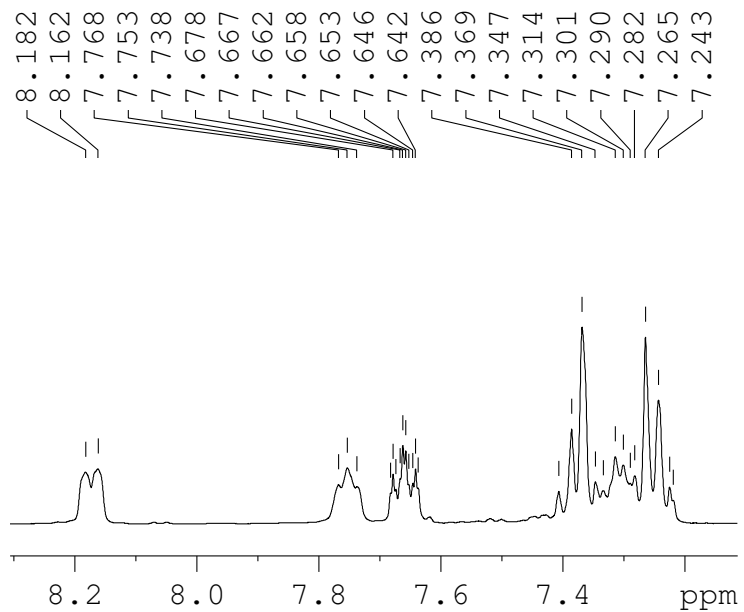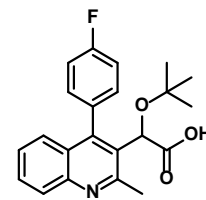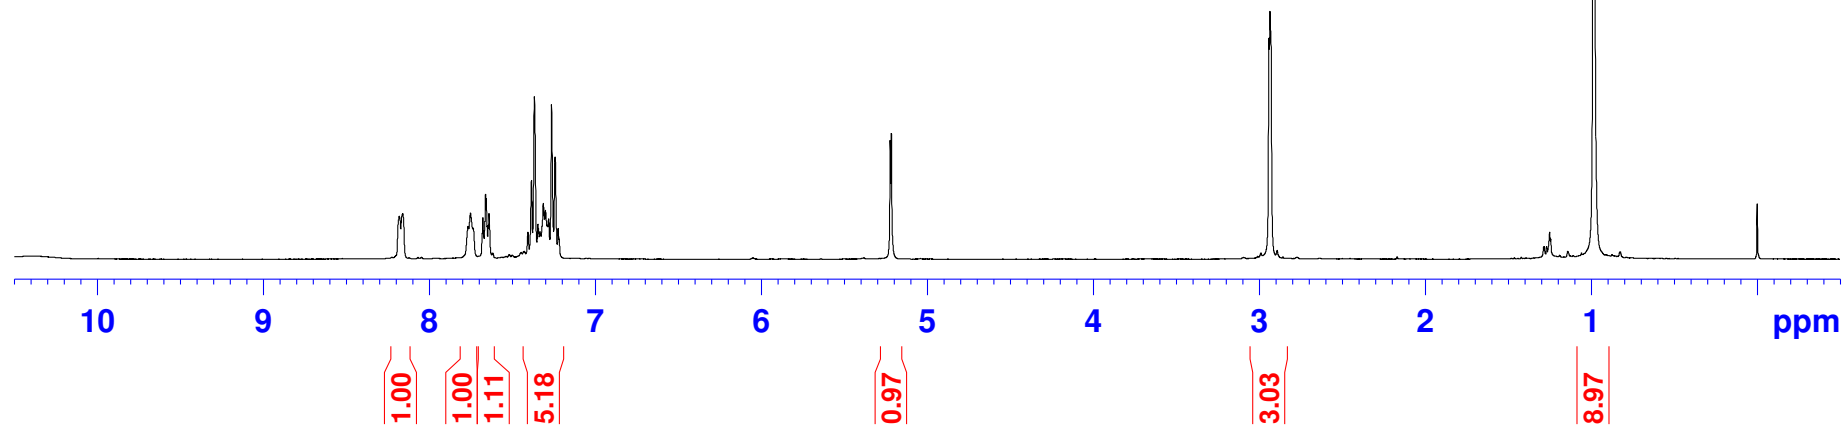

NGJ-8-100 characterization (400MHz, CDC13)

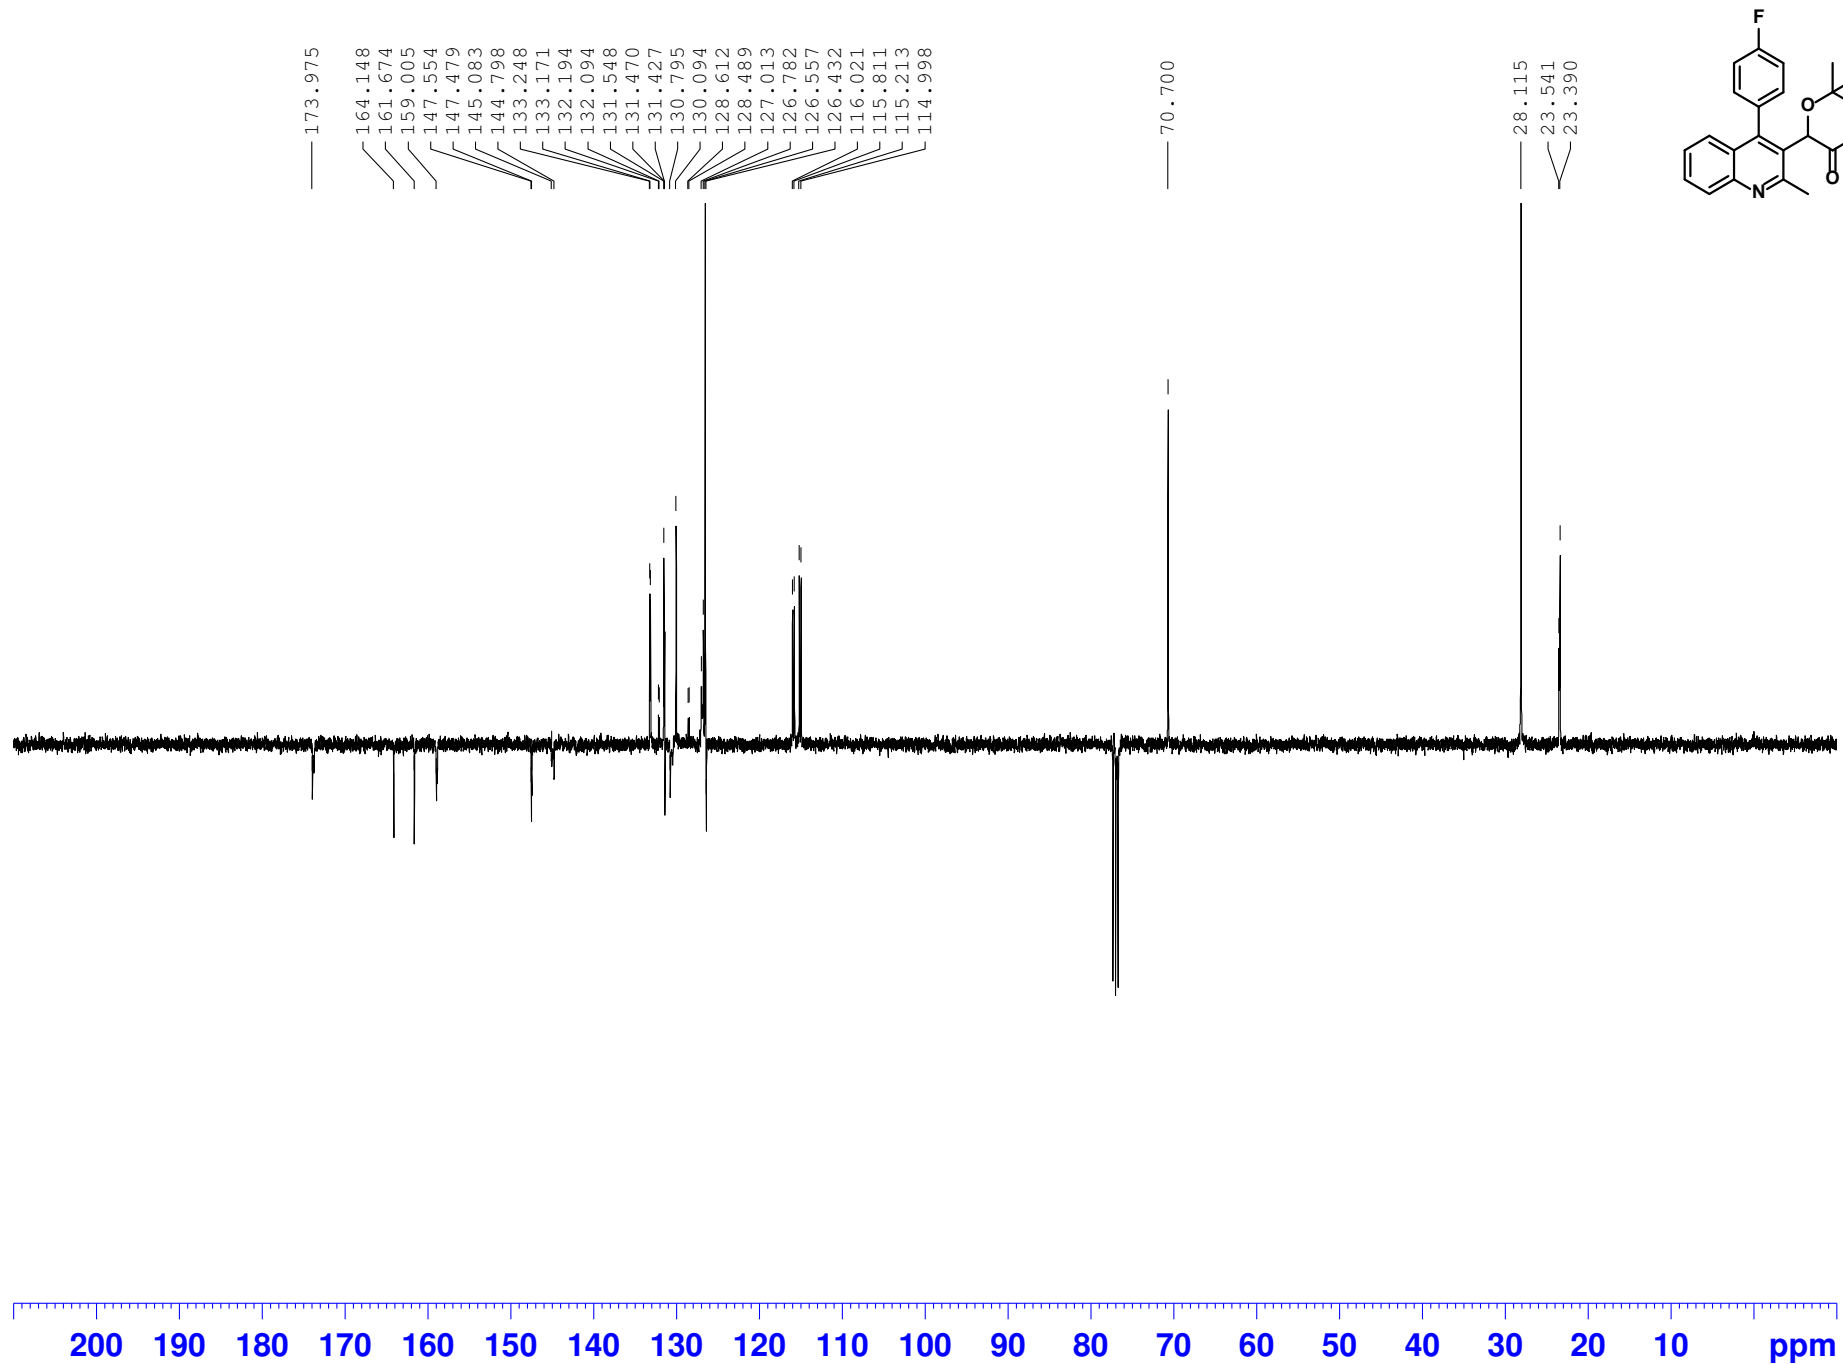

# Mass Spectrum List Report

## Analysis Info

Analysis Name F:\MS1-091514 - 080917\Data\apexdata031918\NGJ-8-100\_pos\_000001.d  
Method  
Sample Name NGJ-8-100  
Comment NGJ-8-100 in THF:MeOH C22H22FNO3 H+

Acquisition Date 3/19/2018 3:59:29 PM  
Operator FTMS\_USER  
Instrument apex-Qe

Sample Name NGJ-8-100 in THF:MeOH  
Exact Mass of C22H22FNO3 H+ = 368.165648 m/z  
Mass Observed = 368.165826 m/z

Difference < 1.0 ppm

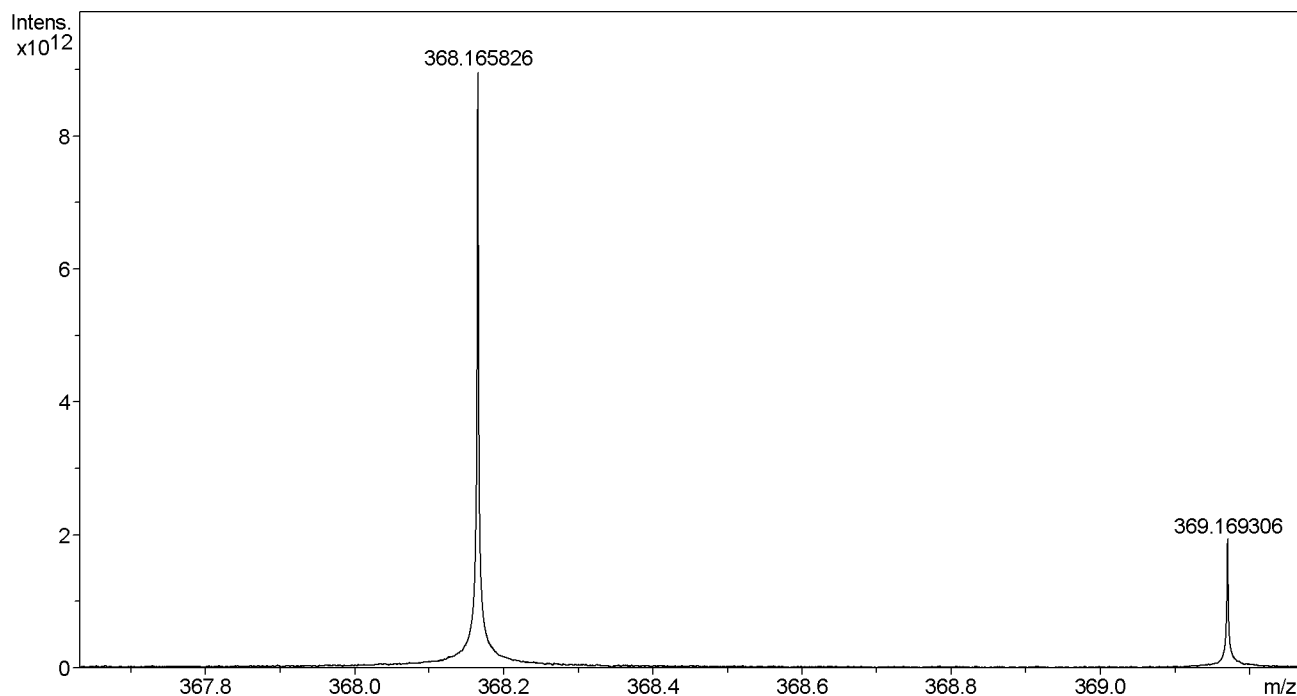

| #  | m/z        | I           |
|----|------------|-------------|
| 1  | 184.587286 | 29428104043 |
| 2  | 188.231366 | 21202293593 |
| 3  | 189.685592 | 23912711629 |
| 4  | 190.061808 | 75853387750 |
| 5  | 190.456284 | 21218081443 |
| 6  | 191.639829 | 21570365992 |
| 7  | 191.908687 | 21513637034 |
| 8  | 192.804667 | 21554919386 |
| 9  | 199.645191 | 21103024636 |
| 10 | 199.992880 | 21956606407 |
| 11 | 200.395320 | 21277755247 |
| 12 | 201.917945 | 22422443092 |
| 13 | 202.340548 | 81512240502 |
| 14 | 202.576100 | 21369689827 |
| 15 | 203.723946 | 22362429648 |
| 16 | 204.172700 | 21083402888 |
| 17 | 204.895441 | 21607673596 |
| 18 | 211.395570 | 23529712775 |
| 19 | 212.821155 | 21961818494 |
| 20 | 215.224766 | 21037800775 |

---

# Mass Spectrum List Report

---

| #  | m/z        | I           |
|----|------------|-------------|
| 21 | 219.538984 | 21402551586 |
| 22 | 224.487226 | 24289409965 |
| 23 | 225.664219 | 21048379591 |
| 24 | 228.294496 | 22255540082 |
| 25 | 230.914523 | 21300638718 |
| 26 | 230.969433 | 22049404968 |
| 27 | 231.649823 | 21399541736 |
| 28 | 234.244101 | 21869957666 |
| 29 | 239.949183 | 21914128764 |
| 30 | 245.170497 | 23807719984 |
| 31 | 245.715599 | 24180426662 |
| 32 | 246.393856 | 21188739722 |
| 33 | 246.684935 | 21887583257 |
| 34 | 249.152860 | 21518806174 |
| 35 | 255.212071 | 23418475510 |
| 36 | 255.254723 | 24084312304 |
| 37 | 256.207563 | 24472732120 |
| 38 | 256.986923 | 21168976854 |
| 39 | 258.706084 | 21845214515 |
| 40 | 260.187611 | 21394434868 |
| 41 | 261.856031 | 21566058180 |
| 42 | 262.945504 | 21916076789 |
| 43 | 263.954176 | 21637707313 |
| 44 | 267.953954 | 21500236923 |
| 45 | 270.054313 | 21409007901 |
| 46 | 272.236113 | 26922817202 |
| 47 | 272.437663 | 21312134992 |
| 48 | 278.220389 | 26153489451 |
| 49 | 283.115609 | 22777635133 |
| 50 | 283.184675 | 21804540940 |
| 51 | 283.218367 | 21278279257 |
| 52 | 283.562806 | 42574913004 |
| 53 | 285.374806 | 22055124499 |
| 54 | 289.965499 | 21459274567 |
| 55 | 291.628209 | 24048653305 |
| 56 | 294.443780 | 23529799711 |
| 57 | 296.011248 | 28581643140 |
| 58 | 298.347312 | 24329205924 |
| 59 | 301.074697 | 23228389305 |
| 60 | 303.141719 | 33428311737 |
| 61 | 304.261355 | 52140151606 |
| 62 | 305.499451 | 22876753972 |
| 63 | 306.276946 | 21680759803 |
| 64 | 309.626456 | 22951122527 |
| 65 | 311.223910 | 24715028673 |
| 66 | 312.102744 | 34135525196 |
| 67 | 312.163012 | 22398968064 |
| 68 | 314.377988 | 23445295202 |
| 69 | 315.564510 | 21956640988 |
| 70 | 318.240769 | 39444096841 |
| 71 | 319.657451 | 21939176622 |
| 72 | 320.256386 | 54324095472 |
| 73 | 322.318986 | 25122932663 |
| 74 | 323.755605 | 26309094838 |
| 75 | 326.148845 | 21775535733 |
| 76 | 333.259135 | 22306231955 |
| 77 | 336.251394 | 31207746905 |
| 78 | 339.306527 | 22267727224 |
| 79 | 341.952986 | 22179617197 |
| 80 | 345.279460 | 25079947512 |
| 81 | 347.946088 | 24167717274 |
| 82 | 349.074646 | 22664770265 |
| 83 | 350.230690 | 23429183386 |
| 84 | 352.246291 | 28424805473 |

---

# Mass Spectrum List Report

---

| #   | m/z        | I             |
|-----|------------|---------------|
| 85  | 364.191202 | 23135689584   |
| 86  | 365.057346 | 23257829569   |
| 87  | 366.661752 | 23141777523   |
| 88  | 366.826844 | 22621238447   |
| 89  | 367.509035 | 22837209830   |
| 90  | 367.572222 | 27611088877   |
| 91  | 367.606597 | 26746928355   |
| 92  | 367.654777 | 26530051411   |
| 93  | 367.668221 | 28072032185   |
| 94  | 367.730071 | 26677391886   |
| 95  | 367.770567 | 23768921092   |
| 96  | 367.805670 | 29511969018   |
| 97  | 367.861038 | 32246462692   |
| 98  | 367.897439 | 34143205999   |
| 99  | 367.918000 | 33120524913   |
| 100 | 367.938092 | 31969260781   |
| 101 | 367.972969 | 42043841622   |
| 102 | 368.036012 | 62228498823   |
| 103 | 368.165826 | 8976712369285 |
| 104 | 368.268222 | 63648690994   |
| 105 | 368.325391 | 50715750995   |
| 106 | 368.354500 | 37877610565   |
| 107 | 368.410409 | 33444684299   |
| 108 | 368.451236 | 33560952182   |
| 109 | 368.508999 | 27863971359   |
| 110 | 368.520315 | 31119575425   |
| 111 | 368.561800 | 24251410848   |
| 112 | 368.784498 | 25939171210   |
| 113 | 369.169306 | 1933774614521 |
| 114 | 369.229856 | 29979166319   |
| 115 | 369.569625 | 23389620523   |
| 116 | 369.879699 | 44229118978   |
| 117 | 369.882749 | 61447793864   |
| 118 | 370.172849 | 105486679590  |
| 119 | 375.170767 | 28332764383   |
| 120 | 383.137827 | 22796937767   |
| 121 | 383.177595 | 23435661312   |
| 122 | 384.136550 | 38441102863   |
| 123 | 387.482352 | 23611285449   |
| 124 | 390.148130 | 167984441468  |
| 125 | 391.151470 | 41577473475   |
| 126 | 391.164757 | 26261113984   |
| 127 | 398.241897 | 415760284509  |
| 128 | 399.245253 | 73466834112   |
| 129 | 405.516794 | 22976092972   |
| 130 | 408.181083 | 28317779985   |
| 131 | 412.130120 | 25289907273   |
| 132 | 424.179910 | 24561969433   |
| 133 | 424.228895 | 41694949574   |
| 134 | 425.287891 | 99766621964   |
| 135 | 435.345045 | 110485573132  |
| 136 | 437.952342 | 22404025911   |
| 137 | 452.519673 | 40161835580   |
| 138 | 453.447404 | 22233044806   |
| 139 | 480.550917 | 85435717979   |
| 140 | 481.554482 | 39253338015   |
| 141 | 484.235821 | 23606813704   |
| 142 | 493.175701 | 90344927228   |
| 143 | 495.212049 | 28829477673   |
| 144 | 505.426691 | 22458670635   |
| 145 | 508.547766 | 43730105807   |
| 146 | 508.582230 | 790230530628  |
| 147 | 509.191169 | 22750040944   |
| 148 | 509.585695 | 227574018221  |

---

# Mass Spectrum List Report

---

| #   | m/z        | I             |
|-----|------------|---------------|
| 149 | 515.876901 | 23475215728   |
| 150 | 521.294404 | 22203548429   |
| 151 | 522.598119 | 45198318419   |
| 152 | 523.601030 | 30194484625   |
| 153 | 524.577206 | 30355179471   |
| 154 | 536.254714 | 22686557462   |
| 155 | 536.613428 | 2905843622817 |
| 156 | 536.843366 | 28706842942   |
| 157 | 536.917089 | 25951370234   |
| 158 | 536.930710 | 26994213896   |
| 159 | 536.955538 | 24363399846   |
| 160 | 537.177998 | 22818626242   |
| 161 | 537.380482 | 24241015115   |
| 162 | 537.413155 | 22391148860   |
| 163 | 537.466211 | 23096453555   |
| 164 | 537.535504 | 32600926885   |
| 165 | 537.616885 | 1001934152788 |
| 166 | 538.620357 | 132134655521  |
| 167 | 539.344500 | 23587032199   |
| 168 | 550.593224 | 43466758503   |
| 169 | 550.629261 | 42151977956   |
| 170 | 552.608623 | 112216846025  |
| 171 | 553.302332 | 23196809930   |
| 172 | 553.612309 | 31367048143   |
| 173 | 554.864519 | 23762433445   |
| 174 | 558.123164 | 23997062637   |
| 175 | 561.889165 | 26598934701   |
| 176 | 564.644918 | 880897818422  |
| 177 | 564.832973 | 22955185682   |
| 178 | 565.534052 | 26378933388   |
| 179 | 565.648366 | 290175634190  |
| 180 | 566.651565 | 41198984503   |
| 181 | 578.848000 | 23803868520   |
| 182 | 580.640131 | 38671033189   |
| 183 | 587.248101 | 83099257280   |
| 184 | 588.235411 | 43608319033   |
| 185 | 589.244914 | 33601036311   |
| 186 | 592.385975 | 25629828794   |
| 187 | 592.676267 | 1134389213138 |
| 188 | 592.818144 | 27846535953   |
| 189 | 592.885783 | 24101766542   |
| 190 | 593.679687 | 389010356603  |
| 191 | 594.683051 | 59611854440   |
| 192 | 599.549288 | 61829378317   |
| 193 | 608.671299 | 33528261628   |
| 194 | 609.674953 | 23263436318   |
| 195 | 620.707627 | 44812311969   |
| 196 | 625.721534 | 24117365469   |
| 197 | 655.262628 | 23481219159   |
| 198 | 662.767871 | 22907386679   |
| 199 | 663.236215 | 25419136394   |
| 200 | 664.701610 | 22754434058   |
| 201 | 677.334670 | 23839546277   |
| 202 | 680.435994 | 24003212210   |
| 203 | 685.437006 | 51185341786   |
| 204 | 686.440751 | 26383897856   |
| 205 | 781.460128 | 22903065875   |
| 206 | 834.655949 | 23345355645   |
| 207 | 877.538581 | 24543383040   |
| 208 | 883.691098 | 24567909324   |
| 209 | 909.351834 | 23515518842   |
| 210 | 934.692150 | 23524885419   |
| 211 | 978.577920 | 23093565149   |
| 212 | 984.526199 | 25051097187   |



---

# Mass Spectrum List Report

---

| #   | m/z        | I           |
|-----|------------|-------------|
| 213 | 999.213168 | 24233926761 |

NGJ-9-022 (CD3OD, 400MHz) Pure Yellow Oil - saponification of 4-methylphenyl quinoline

NAME NGJ-9-022  
 EXPNO 30  
 PROCNO 1  
 Date\_ 20171221  
 Time\_ 16.50 h  
 INSTRUM spect  
 PROBHD Z108618\_0161 ( zq30  
 PULPROG 65536  
 TD 65536  
 SOLVENT MeOD  
 NS 16  
 DS 2  
 SWH 8012.820 Hz  
 FIDRES 0.244532 Hz  
 AQ 4.0894966 sec  
 RG 203  
 DW 62.400 usec  
 DE 6.50 usec  
 TE 298.3 K  
 D1 1.00000000 sec  
 TD0 1  
 SFO1 400.1724710 MHz  
 NUC1 1H  
 P1 9.88 usec  
 SI 65536  
 SF 400.1700519 MHz  
 WDW EM  
 SSB 0  
 LB 0.30 Hz  
 GB 0  
 PC 1.00

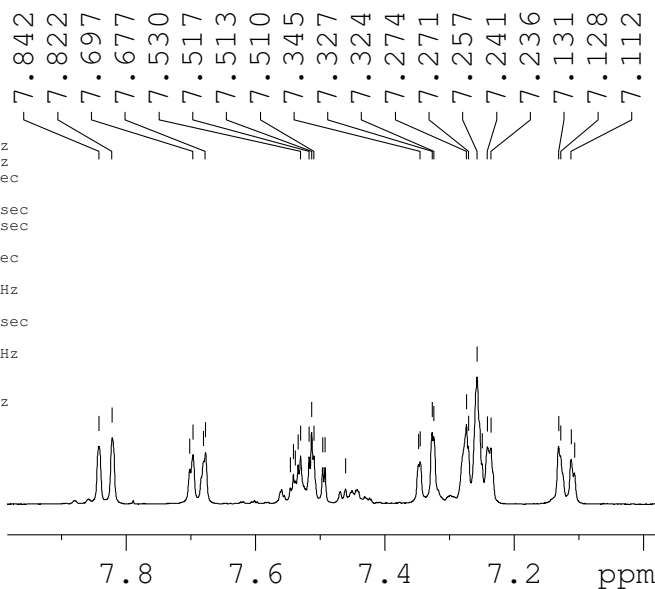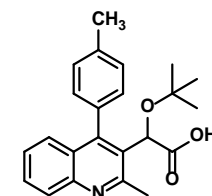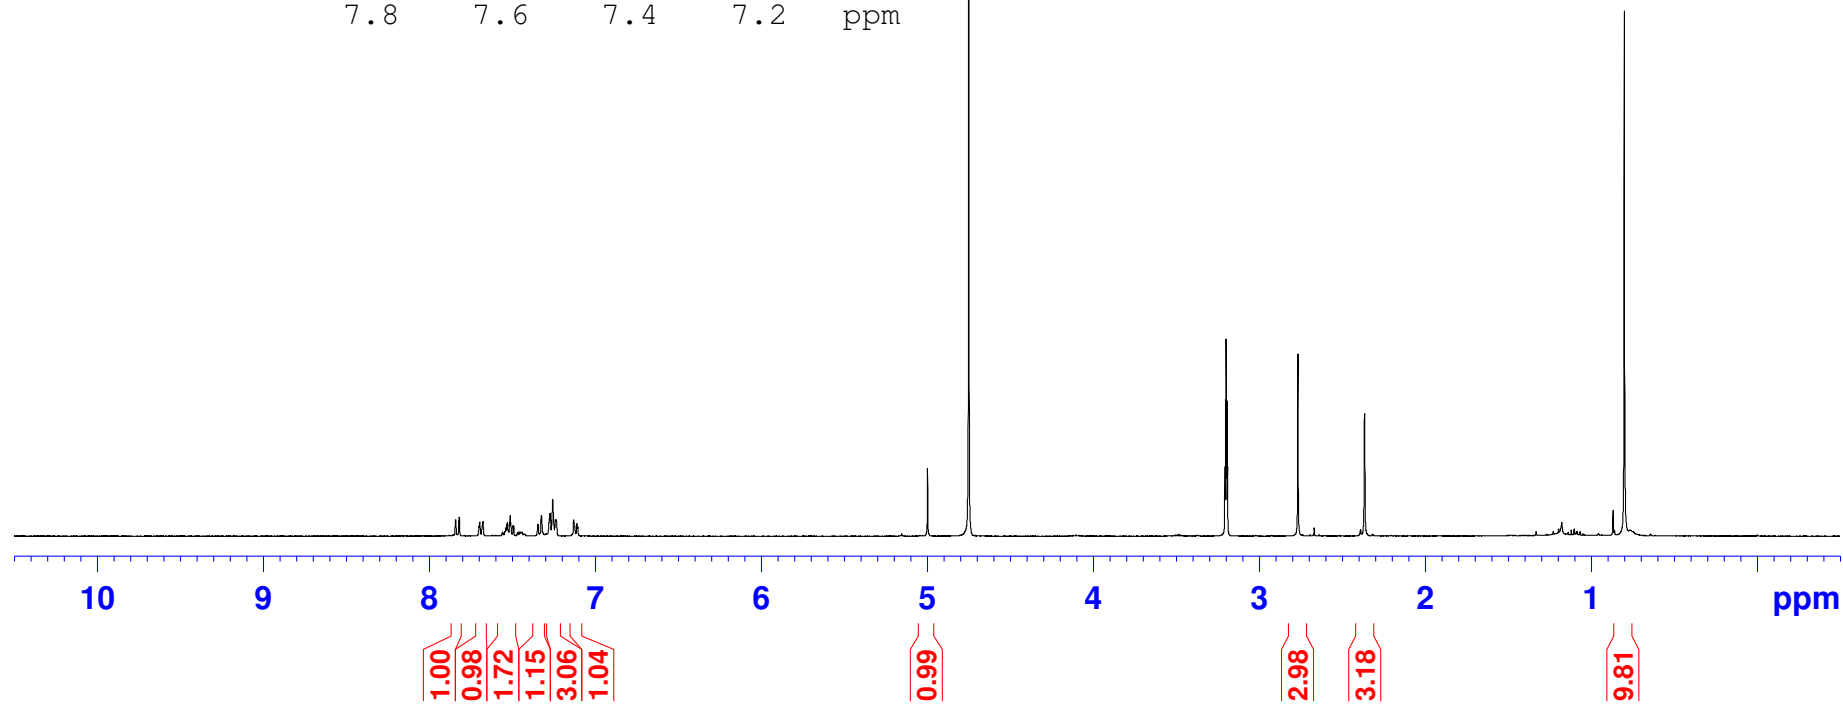

NGJ-9-022 (CD3OD, 400MHz) Pure Yellow Oil - saponification of 4-methylphenyl quinoline

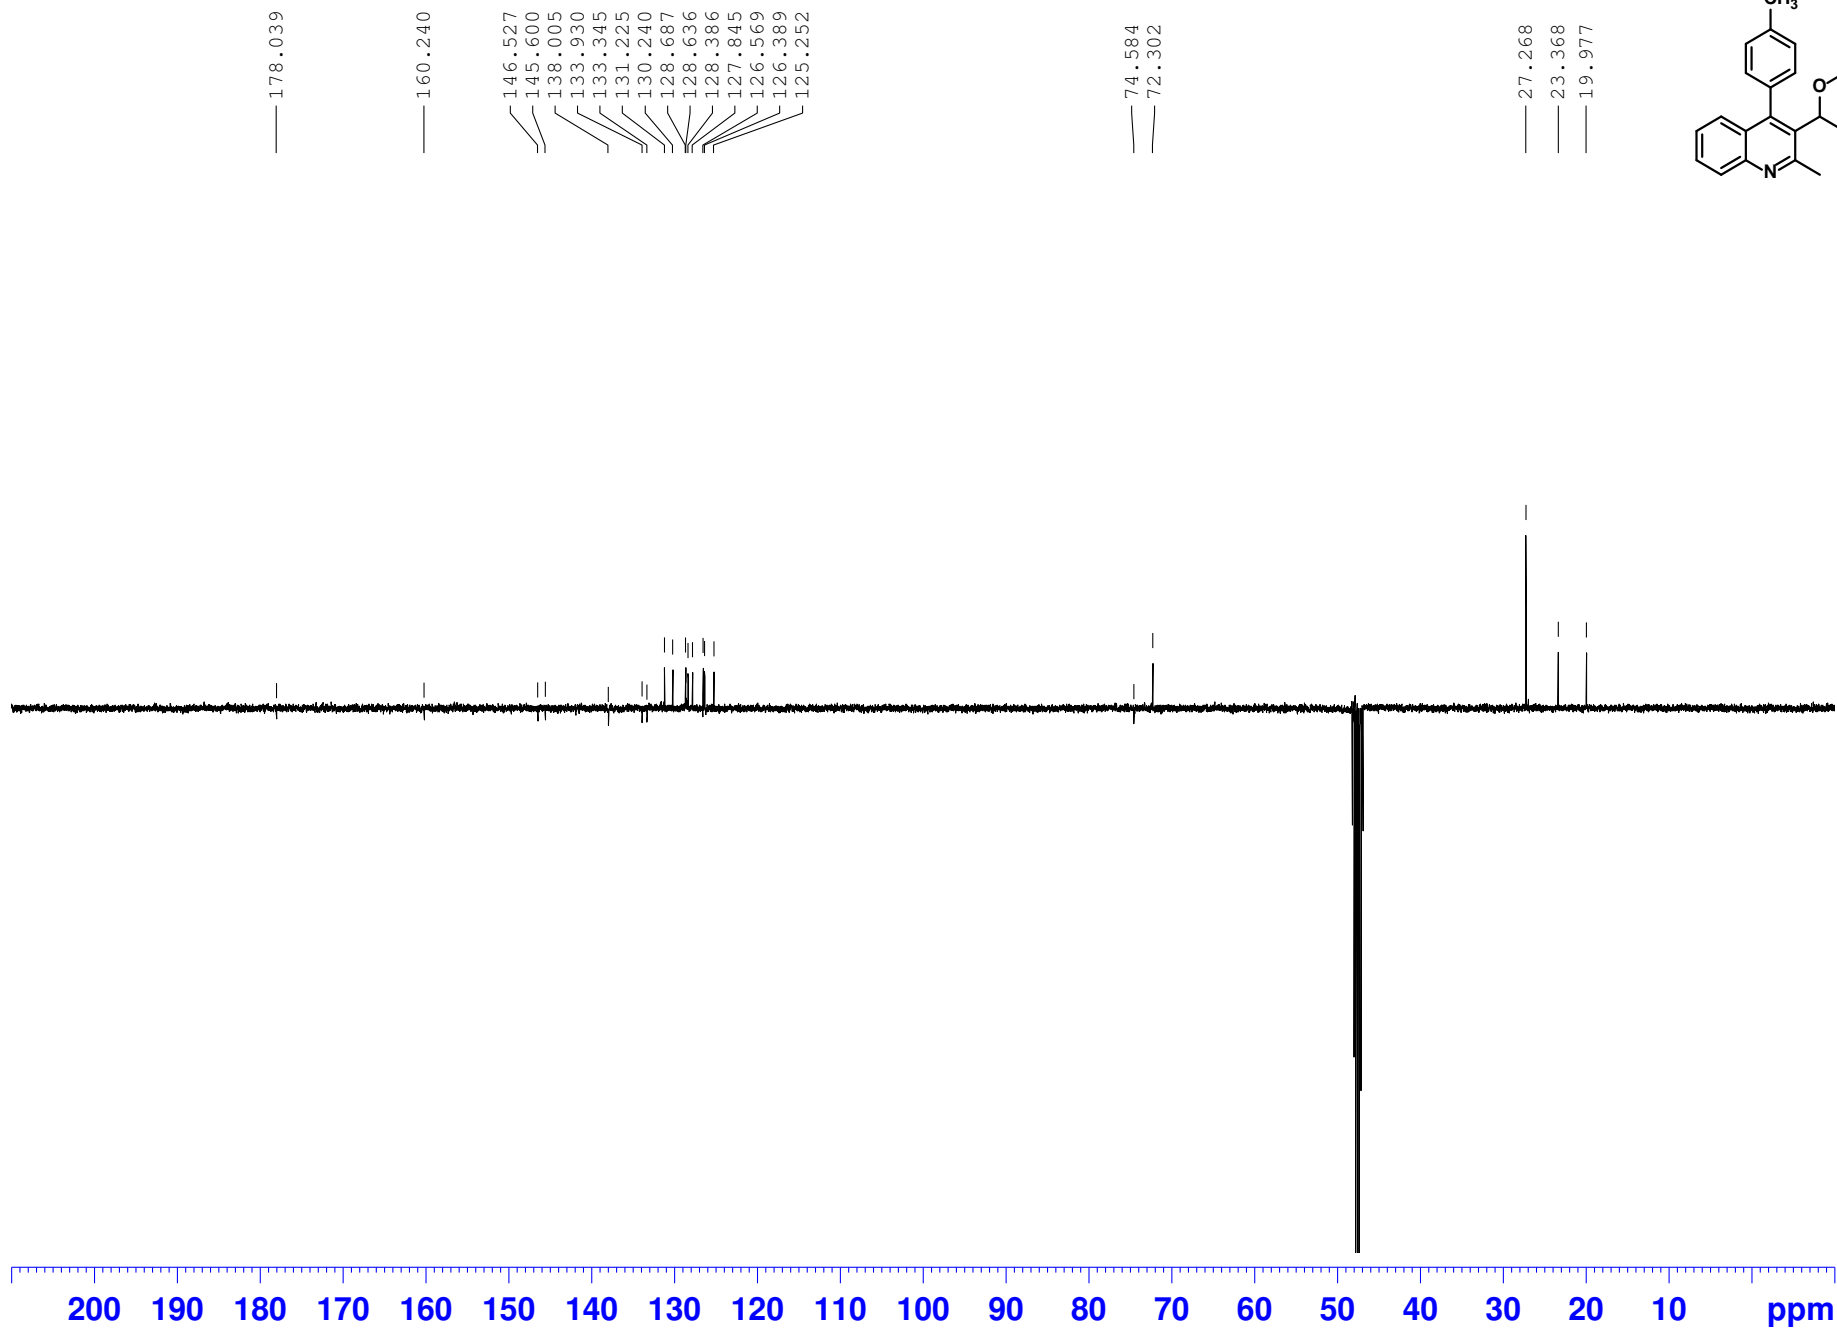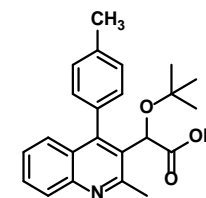

# Mass Spectrum List Report

## Analysis Info

Analysis Name F:\MS1-091514 - 080917\Data\apexdata031918\NGJ-9-022\_pos\_000001.d  
Method  
Sample Name NGJ-9-022  
Comment NGJ-9-022 in THF:MeOH C23H25NO3 H+

Acquisition Date 3/19/2018 2:54:39 PM  
Operator FTMS\_USER  
Instrument apex-Qe

Sample Name NGJ-9-022 in THF:MeOH  
Exact Mass of C23H25NO3 H+ = 364.190720 m/z  
Mass Observed = 364.191012 m/z

Difference < 1.0 ppm

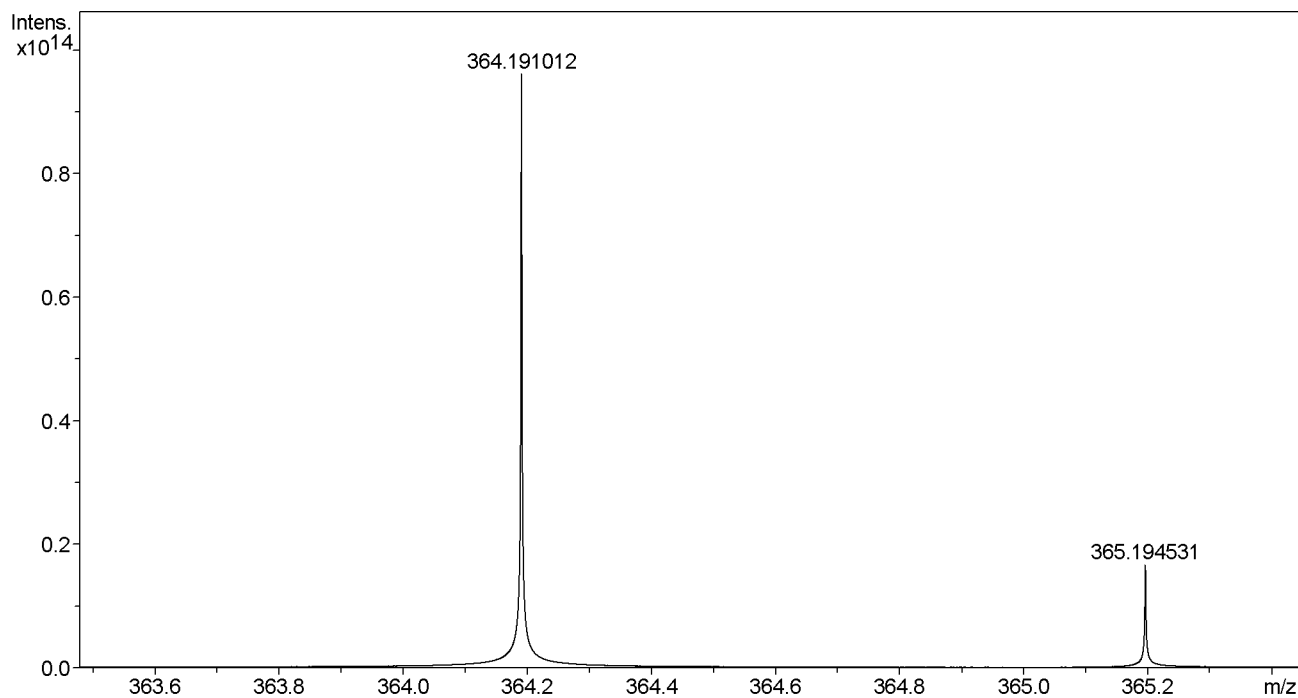

| #  | m/z        | I            |
|----|------------|--------------|
| 1  | 184.390484 | 26121340009  |
| 2  | 185.239329 | 27130217344  |
| 3  | 185.612710 | 26391942156  |
| 4  | 186.030889 | 117969552307 |
| 5  | 186.554601 | 680331019976 |
| 6  | 187.385720 | 27411029276  |
| 7  | 187.446888 | 30165753968  |
| 8  | 189.079212 | 27657244545  |
| 9  | 189.191218 | 26941872343  |
| 10 | 189.759607 | 26862098226  |
| 11 | 190.925524 | 27557996441  |
| 12 | 191.446331 | 27994216710  |
| 13 | 191.870158 | 28136291263  |
| 14 | 192.235430 | 26726095797  |
| 15 | 192.342017 | 27098959068  |
| 16 | 192.839923 | 27121706364  |
| 17 | 193.643766 | 47480269548  |
| 18 | 193.927230 | 25934989042  |
| 19 | 194.791813 | 29518261071  |
| 20 | 196.005217 | 27398920594  |

---

# Mass Spectrum List Report

---

| #  | m/z        | I            |
|----|------------|--------------|
| 21 | 196.072295 | 30354712896  |
| 22 | 196.113298 | 36255918467  |
| 23 | 196.114220 | 86534104495  |
| 24 | 196.615942 | 39793569415  |
| 25 | 199.030982 | 30888572708  |
| 26 | 199.154736 | 27315693914  |
| 27 | 199.770558 | 28808296408  |
| 28 | 202.077832 | 34272316336  |
| 29 | 202.340539 | 83862114630  |
| 30 | 202.497369 | 26933006370  |
| 31 | 203.072938 | 27591224346  |
| 32 | 204.093494 | 27173366497  |
| 33 | 205.169101 | 28123315653  |
| 34 | 207.749166 | 28686423086  |
| 35 | 209.441854 | 29358358060  |
| 36 | 209.806335 | 26088464326  |
| 37 | 214.545251 | 26212148504  |
| 38 | 216.080968 | 27344366511  |
| 39 | 217.088121 | 27918221616  |
| 40 | 218.096602 | 32515625595  |
| 41 | 218.464172 | 27601850473  |
| 42 | 219.099944 | 30700106721  |
| 43 | 222.230976 | 29423067610  |
| 44 | 225.218543 | 28563888470  |
| 45 | 226.524058 | 26522856972  |
| 46 | 231.104320 | 34424479566  |
| 47 | 232.111982 | 38447115207  |
| 48 | 232.551938 | 26242094307  |
| 49 | 233.115305 | 27652658832  |
| 50 | 233.882704 | 35725973900  |
| 51 | 234.091479 | 28129749101  |
| 52 | 236.070050 | 32174840130  |
| 53 | 239.237478 | 26775330027  |
| 54 | 239.794487 | 26278653043  |
| 55 | 240.579593 | 27520294754  |
| 56 | 243.284116 | 27411499630  |
| 57 | 246.996805 | 29375506305  |
| 58 | 247.544663 | 27166093063  |
| 59 | 248.106995 | 47939064483  |
| 60 | 248.461275 | 26337203389  |
| 61 | 254.812095 | 27525424962  |
| 62 | 261.114966 | 44168657079  |
| 63 | 261.744470 | 27580645481  |
| 64 | 262.122007 | 41054476044  |
| 65 | 264.013042 | 29170032300  |
| 66 | 264.127068 | 29563436004  |
| 67 | 265.566023 | 26360542533  |
| 68 | 274.491454 | 28471594027  |
| 69 | 276.495993 | 27565009755  |
| 70 | 278.751943 | 26567475044  |
| 71 | 280.613466 | 26297930434  |
| 72 | 280.822738 | 28685898575  |
| 73 | 285.232936 | 27740897663  |
| 74 | 289.206140 | 26451128236  |
| 75 | 289.617284 | 25853076821  |
| 76 | 290.117085 | 29028692445  |
| 77 | 295.785125 | 26476626520  |
| 78 | 295.962963 | 26180606393  |
| 79 | 301.023701 | 27262530241  |
| 80 | 301.075841 | 813087137248 |
| 81 | 301.118453 | 31665341044  |
| 82 | 302.079243 | 63239449328  |
| 83 | 304.169794 | 31864817503  |
| 84 | 304.599081 | 25791021790  |

---

# Mass Spectrum List Report

---

| #   | m/z        | I            |
|-----|------------|--------------|
| 85  | 304.984789 | 26608947645  |
| 86  | 305.835487 | 26697681626  |
| 87  | 307.120385 | 32649596036  |
| 88  | 308.128318 | 101779901185 |
| 89  | 309.131690 | 41919386246  |
| 90  | 310.283603 | 48179556116  |
| 91  | 312.081496 | 26163451005  |
| 92  | 312.100157 | 149232909890 |
| 93  | 312.173995 | 333371732045 |
| 94  | 314.447876 | 26420554406  |
| 95  | 315.091581 | 140432102896 |
| 96  | 316.094965 | 37286525042  |
| 97  | 320.670327 | 31083670306  |
| 98  | 330.750217 | 30417787859  |
| 99  | 339.899024 | 67903351375  |
| 100 | 355.762535 | 37898782344  |
| 101 | 360.527247 | 38547812089  |
| 102 | 360.958773 | 37385817859  |
| 103 | 361.532243 | 35246336400  |
| 104 | 361.696052 | 38657263615  |
| 105 | 361.728644 | 35594714522  |
| 106 | 361.746228 | 35368683899  |
| 107 | 361.794131 | 40676427357  |
| 108 | 361.835760 | 36515734534  |
| 109 | 361.875236 | 35973647105  |
| 110 | 361.897776 | 37453329619  |
| 111 | 361.920485 | 38436521350  |
| 112 | 361.974037 | 41922199102  |
| 113 | 362.005991 | 41297900795  |
| 114 | 362.021084 | 40774140878  |
| 115 | 362.101467 | 43027353570  |
| 116 | 362.143438 | 45716982254  |
| 117 | 362.212987 | 47263192835  |
| 118 | 362.241732 | 51351730318  |
| 119 | 362.294153 | 41426366386  |
| 120 | 362.345131 | 41194185959  |
| 121 | 362.405410 | 54232885274  |
| 122 | 362.437690 | 47217354895  |
| 123 | 362.529023 | 55377920428  |
| 124 | 362.566785 | 48450428214  |
| 125 | 362.592202 | 49091252747  |
| 126 | 362.607357 | 50186459611  |
| 127 | 362.631835 | 47211459353  |
| 128 | 362.719069 | 51814769876  |
| 129 | 362.812865 | 56740272271  |
| 130 | 362.837873 | 55820101461  |
| 131 | 362.863754 | 59660912668  |
| 132 | 362.875584 | 58266176749  |
| 133 | 362.969789 | 58180235490  |
| 134 | 363.045807 | 65526805270  |
| 135 | 363.094967 | 65057633644  |
| 136 | 363.151451 | 71300851584  |
| 137 | 363.186963 | 59394995556  |
| 138 | 363.194260 | 73750213134  |
| 139 | 363.261174 | 72817886101  |
| 140 | 363.375847 | 78284178958  |
| 141 | 363.404920 | 81433014169  |
| 142 | 363.434919 | 88965788914  |
| 143 | 363.472118 | 89548146550  |
| 144 | 363.500054 | 91903570279  |
| 145 | 363.538530 | 100191322943 |
| 146 | 363.596249 | 103214335393 |
| 147 | 363.610666 | 112065218742 |
| 148 | 363.649926 | 110786586086 |

---

# Mass Spectrum List Report

---

| #   | m/z        | I              |
|-----|------------|----------------|
| 149 | 363.755428 | 136427169225   |
| 150 | 363.927256 | 210653626336   |
| 151 | 364.191012 | 95995498557340 |
| 152 | 364.588720 | 130698593891   |
| 153 | 364.721610 | 90574666050    |
| 154 | 364.784419 | 85206418296    |
| 155 | 364.829401 | 80555930791    |
| 156 | 364.891768 | 60041860567    |
| 157 | 364.938300 | 56023337177    |
| 158 | 365.194531 | 16711533920179 |
| 159 | 365.290133 | 161601114228   |
| 160 | 365.376104 | 118958510649   |
| 161 | 365.437195 | 100135956497   |
| 162 | 365.526632 | 75479320354    |
| 163 | 365.564802 | 80440344684    |
| 164 | 365.680969 | 68278315714    |
| 165 | 365.697104 | 69545920553    |
| 166 | 365.789735 | 60725645434    |
| 167 | 365.812969 | 67589264073    |
| 168 | 365.834808 | 56885096748    |
| 169 | 365.867476 | 56906591822    |
| 170 | 365.893409 | 59099725951    |
| 171 | 365.931775 | 56353912992    |
| 172 | 365.953410 | 58815251520    |
| 173 | 365.992857 | 61568746779    |
| 174 | 366.014529 | 53510240295    |
| 175 | 366.058674 | 56634363444    |
| 176 | 366.198121 | 1177730396501  |
| 177 | 366.280183 | 40062577476    |
| 178 | 366.351363 | 44799386555    |
| 179 | 366.518541 | 40940965163    |
| 180 | 366.546206 | 44161829340    |
| 181 | 366.650979 | 40997697407    |
| 182 | 366.686946 | 40594802027    |
| 183 | 366.739728 | 39647926631    |
| 184 | 366.785625 | 35970421463    |
| 185 | 366.854715 | 45603273853    |
| 186 | 366.867020 | 36333253787    |
| 187 | 366.903697 | 38116633456    |
| 188 | 366.949225 | 38494925889    |
| 189 | 367.051833 | 37643369380    |
| 190 | 367.188032 | 39105123566    |
| 191 | 367.339379 | 35075935140    |
| 192 | 367.909762 | 39601904859    |
| 193 | 369.333898 | 37146408755    |
| 194 | 370.682020 | 35044129076    |
| 195 | 370.787208 | 40668454509    |
| 196 | 372.233034 | 456085844096   |
| 197 | 373.236358 | 67374698958    |
| 198 | 379.180994 | 154510484111   |
| 199 | 381.225791 | 38224168488    |
| 200 | 382.463559 | 1436836473004  |
| 201 | 382.466769 | 304408845503   |
| 202 | 385.751891 | 35117891883    |
| 203 | 386.173593 | 291558851679   |
| 204 | 387.176920 | 100334368685   |
| 205 | 390.704030 | 33479478317    |
| 206 | 390.722208 | 35231198760    |
| 207 | 390.821627 | 32950439760    |
| 208 | 390.909991 | 32931571676    |
| 209 | 390.926584 | 33450808140    |
| 210 | 391.087341 | 33855239710    |
| 211 | 391.146441 | 38523534779    |
| 212 | 391.214398 | 48229998517    |

---

# Mass Spectrum List Report

---

| #   | m/z        | I              |
|-----|------------|----------------|
| 213 | 391.298525 | 44732976914    |
| 214 | 391.365223 | 37489271147    |
| 215 | 391.425181 | 42129108351    |
| 216 | 391.486039 | 50347916532    |
| 217 | 391.558605 | 51004316658    |
| 218 | 391.649737 | 50039033413    |
| 219 | 391.741714 | 62014537649    |
| 220 | 391.778536 | 63394826406    |
| 221 | 391.853916 | 71215565513    |
| 222 | 391.982551 | 105077099973   |
| 223 | 392.004145 | 109844947427   |
| 224 | 392.030377 | 118524353592   |
| 225 | 392.222462 | 28128044808847 |
| 226 | 392.452673 | 90672588132    |
| 227 | 392.519926 | 73218745509    |
| 228 | 392.542954 | 73233608490    |
| 229 | 392.586527 | 59689348967    |
| 230 | 392.641388 | 49846088754    |
| 231 | 392.657463 | 52792480821    |
| 232 | 392.713141 | 49875897869    |
| 233 | 392.738966 | 38906793671    |
| 234 | 392.806143 | 32696126059    |
| 235 | 392.843532 | 41506053813    |
| 236 | 393.225843 | 6872699187433  |
| 237 | 393.346659 | 71387307220    |
| 238 | 393.416059 | 53469227785    |
| 239 | 393.439840 | 49404610261    |
| 240 | 393.466245 | 50366102281    |
| 241 | 393.500884 | 48461214586    |
| 242 | 393.537608 | 44549951575    |
| 243 | 393.566498 | 42586605246    |
| 244 | 393.609470 | 37153000375    |
| 245 | 393.648649 | 42634122770    |
| 246 | 393.683909 | 36463027202    |
| 247 | 393.701358 | 37111278828    |
| 248 | 393.737282 | 32631343717    |
| 249 | 393.867437 | 34092847243    |
| 250 | 394.145586 | 33889826315    |
| 251 | 394.227387 | 62347623984    |
| 252 | 394.229727 | 214904196561   |
| 253 | 398.242381 | 103389787164   |
| 254 | 406.238619 | 708857403438   |
| 255 | 406.272580 | 33206951928    |
| 256 | 407.242215 | 99866746991    |
| 257 | 408.153399 | 136586897157   |
| 258 | 408.155655 | 296679022140   |
| 259 | 409.158886 | 48652408441    |
| 260 | 414.204870 | 674458262160   |
| 261 | 414.247422 | 28757933169    |
| 262 | 415.208419 | 75556148460    |
| 263 | 420.218020 | 27903822475    |
| 264 | 420.252949 | 597995293554   |
| 265 | 420.254269 | 580798517430   |
| 266 | 421.251768 | 58364958698    |
| 267 | 421.257520 | 458214509639   |
| 268 | 430.772803 | 27904261485    |
| 269 | 433.404688 | 28813235318    |
| 270 | 435.345963 | 29686421828    |
| 271 | 436.481777 | 28306915884    |
| 272 | 442.236072 | 34948343255    |
| 273 | 448.223200 | 30926942032    |
| 274 | 448.285605 | 1048581133215  |
| 275 | 448.340724 | 26891044798    |
| 276 | 448.360933 | 30504236565    |



---

# Mass Spectrum List Report

---

| #   | m/z        | I             |
|-----|------------|---------------|
| 277 | 449.289199 | 164627236181  |
| 278 | 453.211734 | 26520545324   |
| 279 | 458.216162 | 28187453580   |
| 280 | 481.263148 | 31103354752   |
| 281 | 482.801832 | 31290644137   |
| 282 | 484.503490 | 30512096024   |
| 283 | 487.082386 | 28647959636   |
| 284 | 490.069807 | 30503480955   |
| 285 | 501.053539 | 27614567894   |
| 286 | 508.583232 | 130361350485  |
| 287 | 509.586506 | 46448054571   |
| 288 | 511.053233 | 31183630971   |
| 289 | 524.578114 | 190837526270  |
| 290 | 525.289785 | 38338023179   |
| 291 | 525.581558 | 52269400586   |
| 292 | 536.542793 | 27758865112   |
| 293 | 536.581108 | 55536455165   |
| 294 | 536.614459 | 893055922157  |
| 295 | 537.396568 | 36886784842   |
| 296 | 537.617889 | 199219720844  |
| 297 | 538.621253 | 31233136291   |
| 298 | 548.601075 | 29710201694   |
| 299 | 552.537024 | 32143274461   |
| 300 | 552.609391 | 1034793338886 |
| 301 | 552.687797 | 35088691954   |
| 302 | 553.612909 | 227631243762  |
| 303 | 564.646086 | 250752466822  |
| 304 | 565.613003 | 27975479908   |
| 305 | 565.649377 | 52488328540   |
| 306 | 573.592519 | 29091981070   |
| 307 | 575.873561 | 30611754590   |
| 308 | 579.163246 | 36095610481   |
| 309 | 580.641086 | 214575743146  |
| 310 | 581.258679 | 73686667868   |
| 311 | 581.644660 | 62065392924   |
| 312 | 582.262086 | 33877333883   |
| 313 | 583.274278 | 130320099873  |
| 314 | 584.277560 | 28997313736   |
| 315 | 585.271178 | 54787170172   |
| 316 | 592.602975 | 33328604313   |
| 317 | 592.677423 | 736757717356  |
| 318 | 593.179325 | 32597916664   |
| 319 | 593.680889 | 195939735383  |
| 320 | 607.179358 | 27615866502   |
| 321 | 608.672457 | 406044815462  |
| 322 | 609.675945 | 117229213098  |
| 323 | 613.431145 | 50494195694   |
| 324 | 620.708981 | 40085695163   |
| 325 | 648.740306 | 42590791250   |
| 326 | 657.457275 | 58819479092   |
| 327 | 658.460467 | 38454801102   |
| 328 | 661.207172 | 29054915972   |
| 329 | 668.350638 | 28144604720   |
| 330 | 685.438179 | 179493095453  |
| 331 | 686.441337 | 64686173340   |
| 332 | 701.484102 | 45714049842   |
| 333 | 715.978104 | 27754199820   |
| 334 | 733.777938 | 27556887614   |
| 335 | 742.375526 | 28181272030   |
| 336 | 759.964561 | 28514714028   |
| 337 | 760.885232 | 28815545803   |
| 338 | 775.909068 | 31135494883   |
| 339 | 840.152161 | 30764128064   |
| 340 | 861.540272 | 28603245088   |

---

## Mass Spectrum List Report

---

| #   | m/z        | I           |
|-----|------------|-------------|
| 341 | 964.855186 | 34389604639 |
| 342 | 986.982656 | 28939406768 |

NGJ-9-023 (CDC13, 400 MHz) Pure Yellow Oil - saponification of 4-trifluoromethylquinoline

NAME NGJ-9-023  
EXPNO 30  
PROCNO 1  
Date\_ 20171221  
Time\_ 18.55 h  
INSTRUM spect  
PROBHD Z108618\_0161 (   
PULPROG zg30  
TD 65536  
SOLVENT CDC13  
NS 16  
DS 2  
SWH 8012.820 Hz  
FIDRES 0.244532 Hz  
AQ 4.0894966 sec  
RG 128  
DW 62.400 usec  
DE 6.50 usec  
TE 298.2 K  
D1 1.00000000 sec  
TD0 1  
SF01 400.1724710 MHz  
NUC1 1H  
P1 9.88 usec  
SI 65536  
SF 400.1700074 MHz  
WDW EM  
SSB 0  
LB 0.30 Hz  
GB 0  
PC 1.00

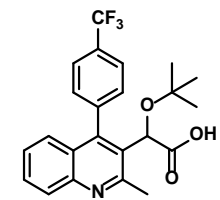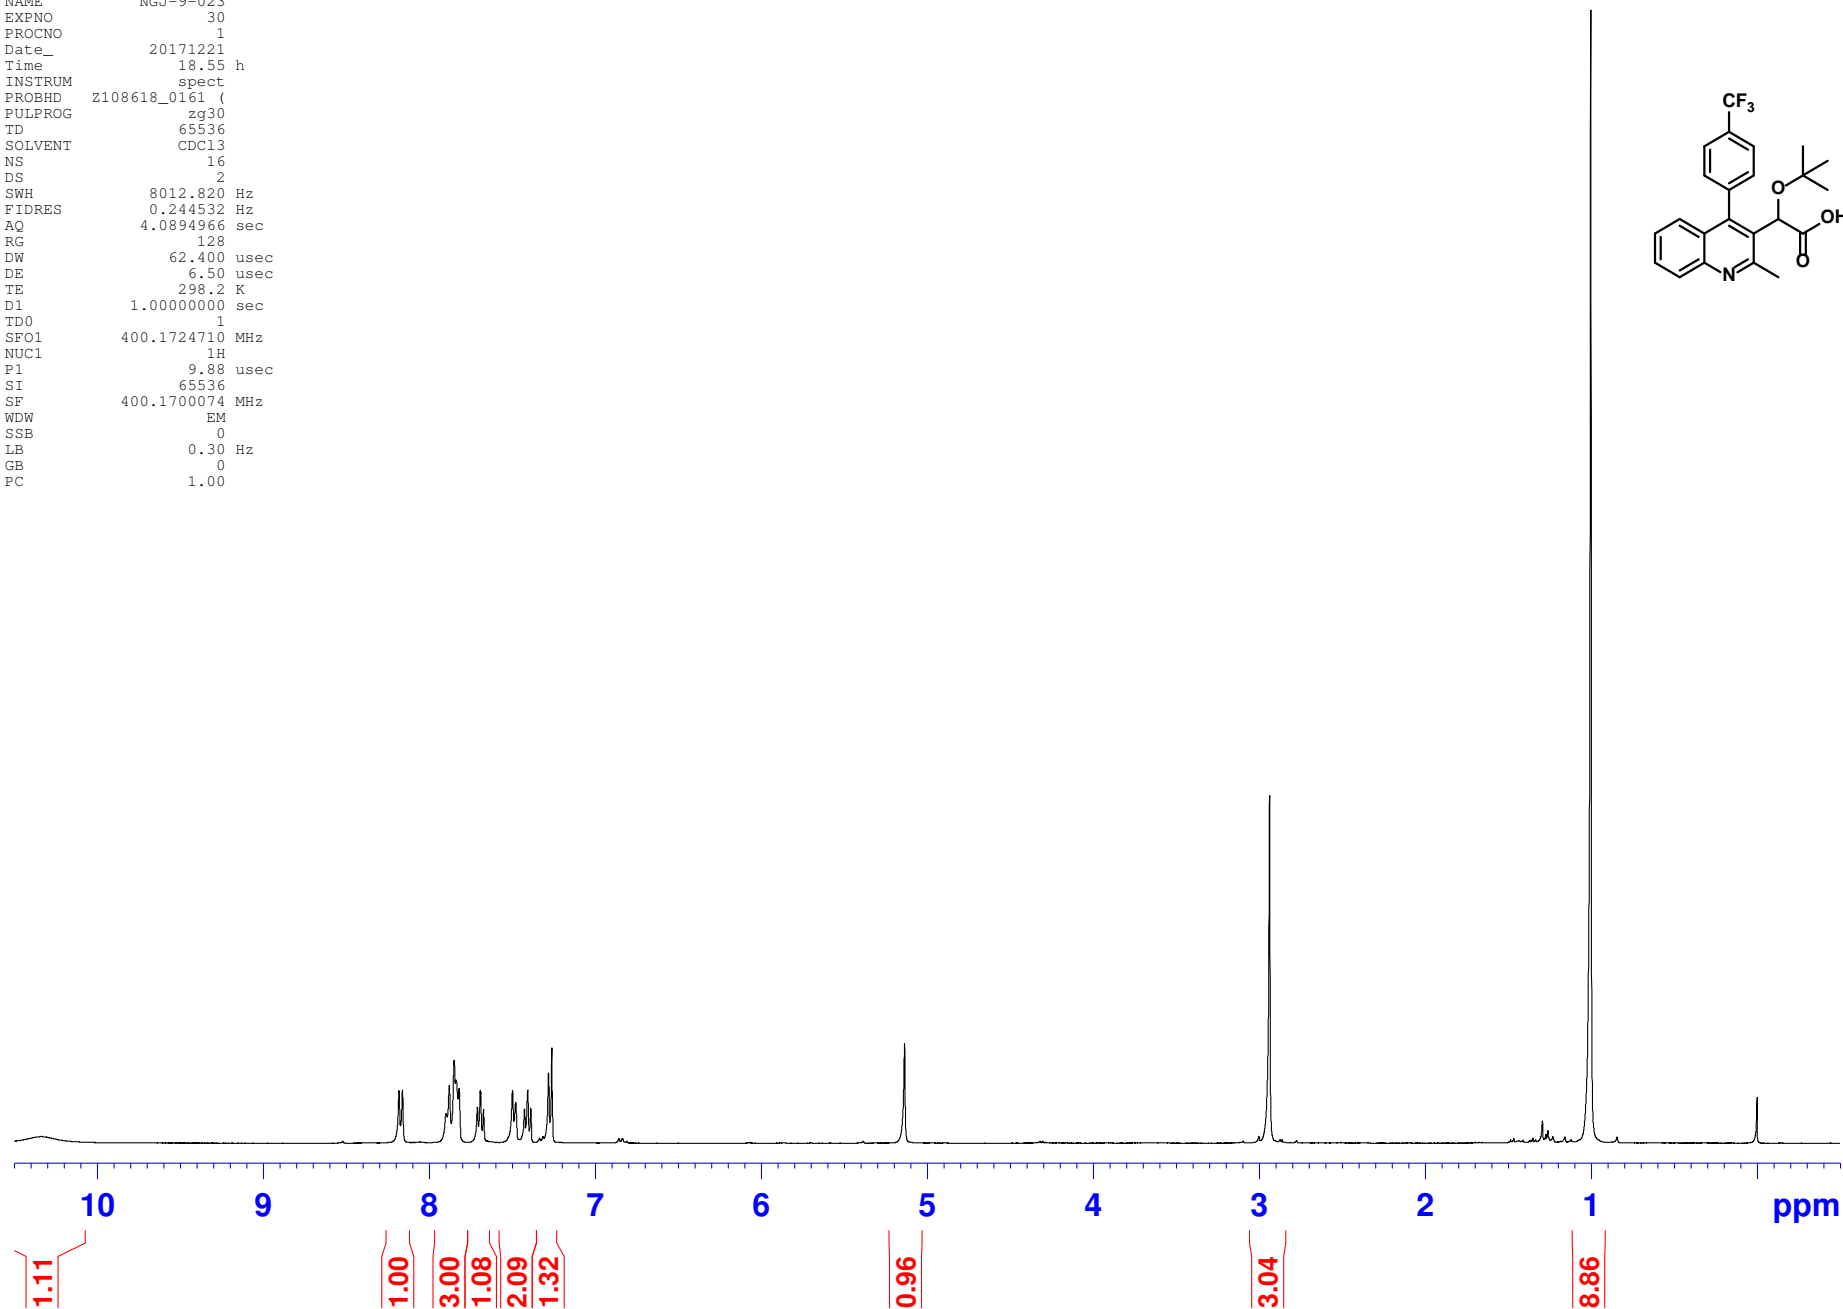

NGJ-9-023 (CDCl<sub>3</sub>, 400 MHz) Pure Yellow Oil - saponification of 4-trifluoromethylquinoline

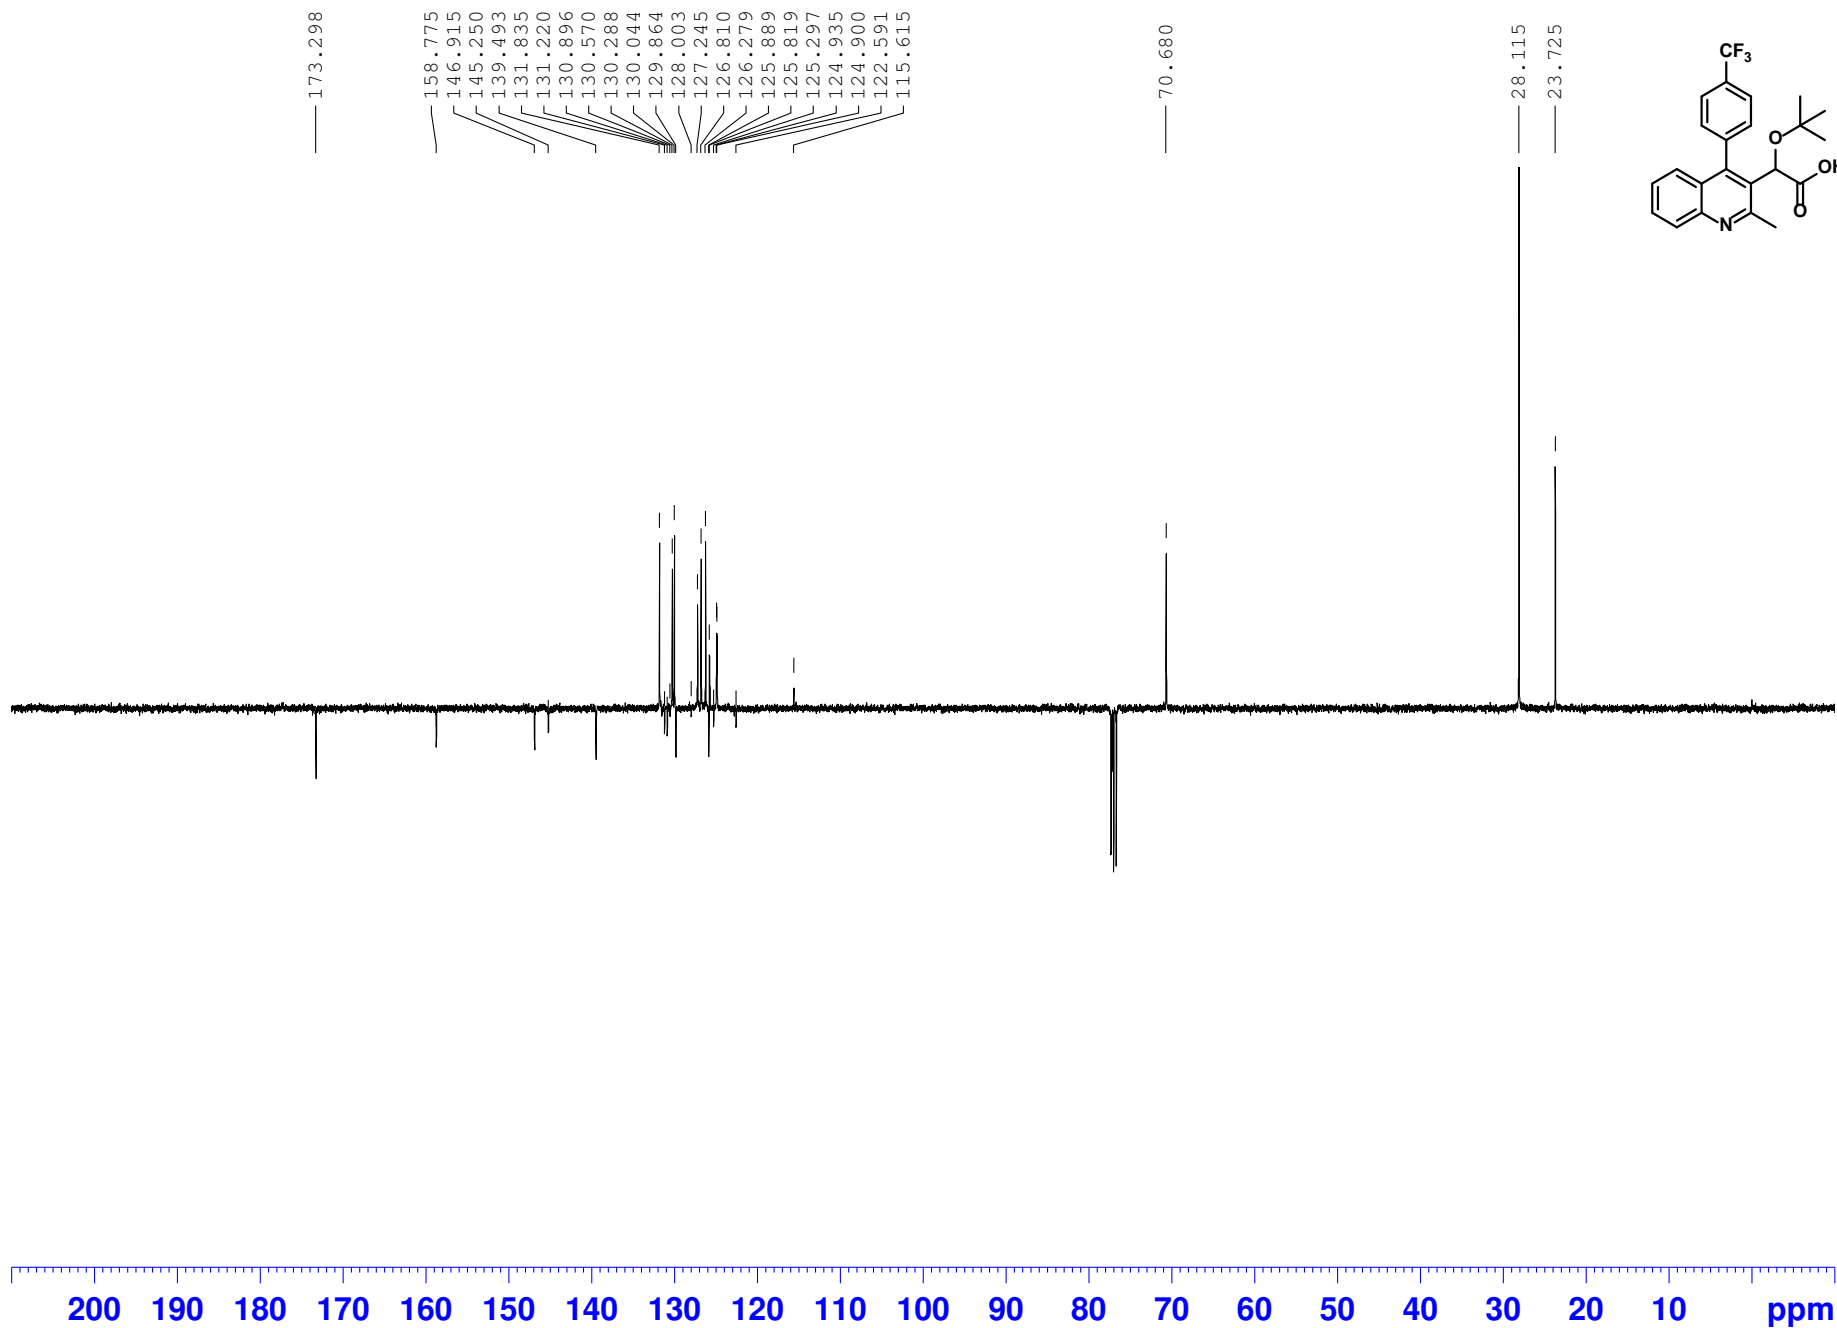

# Mass Spectrum List Report

## Analysis Info

Analysis Name F:\MS1-091514 - 080917\Data\apexdata031918\NGJ-9-023\_pos\_000001.d  
Method  
Sample Name NGJ-9-023  
Comment NGJ-9-023 in THF:MeOH C23H22F3NO3 H+

Acquisition Date 3/19/2018 3:01:42 PM  
Operator FTMS\_USER  
Instrument apex-Qe

Sample Name NGJ-9-023 in THF:MeOH  
Exact Mass of C23H22F3NO3 H+ = 418.162455 m/z  
Mass Observed = 418.162948 m/z

Difference < 2.0 ppm

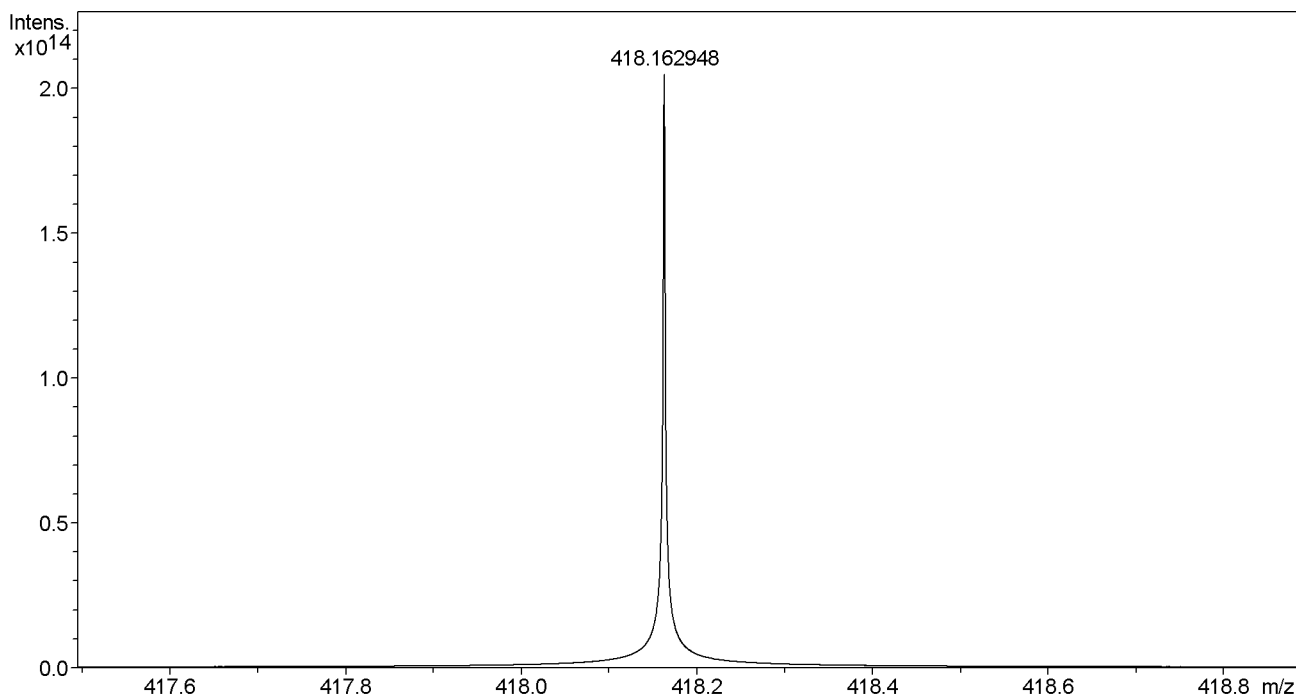

| #  | m/z        | I             |
|----|------------|---------------|
| 1  | 202.340542 | 86751206538   |
| 2  | 208.834936 | 29843734451   |
| 3  | 209.080712 | 86335676380   |
| 4  | 209.084893 | 1673091714989 |
| 5  | 209.098245 | 37852187642   |
| 6  | 209.441923 | 48971971400   |
| 7  | 209.586633 | 436414815461  |
| 8  | 210.088373 | 27197991636   |
| 9  | 216.081010 | 36543265867   |
| 10 | 218.096591 | 43464272274   |
| 11 | 247.099391 | 27445481421   |
| 12 | 254.776910 | 27681524466   |
| 13 | 269.389760 | 41775973696   |
| 14 | 270.635987 | 431826604565  |
| 15 | 271.878647 | 78589768245   |
| 16 | 271.899725 | 4337416885871 |
| 17 | 271.928570 | 63779616472   |
| 18 | 271.948436 | 34638403230   |
| 19 | 272.021662 | 26814662402   |
| 20 | 283.563205 | 27634319208   |

---

# Mass Spectrum List Report

---

| #  | m/z        | I            |
|----|------------|--------------|
| 21 | 284.068533 | 28094777763  |
| 22 | 285.076168 | 67437196183  |
| 23 | 288.099977 | 31532073034  |
| 24 | 294.519073 | 27153446276  |
| 25 | 299.091974 | 28404140765  |
| 26 | 300.099756 | 46285574461  |
| 27 | 315.086651 | 34637826822  |
| 28 | 316.094362 | 81583163239  |
| 29 | 316.191433 | 91259741997  |
| 30 | 316.228001 | 28505789768  |
| 31 | 317.097297 | 35431311719  |
| 32 | 317.102483 | 27728338574  |
| 33 | 330.073980 | 36218937019  |
| 34 | 339.085068 | 29355234851  |
| 35 | 361.092793 | 30660263878  |
| 36 | 362.099956 | 89811557175  |
| 37 | 363.103583 | 70458037502  |
| 38 | 364.191532 | 28778331519  |
| 39 | 366.072286 | 92061332578  |
| 40 | 374.173666 | 116217420162 |
| 41 | 409.562366 | 36346536963  |
| 42 | 409.692373 | 35889210817  |
| 43 | 409.804259 | 35296557243  |
| 44 | 410.662479 | 35355422133  |
| 45 | 410.739336 | 35986955457  |
| 46 | 411.012717 | 37511119970  |
| 47 | 411.100102 | 35768018816  |
| 48 | 411.229053 | 38556788610  |
| 49 | 411.397883 | 38343978952  |
| 50 | 411.541449 | 39606517838  |
| 51 | 411.655041 | 41034158527  |
| 52 | 411.707896 | 41892027621  |
| 53 | 411.830618 | 38849515275  |
| 54 | 411.848383 | 39861531827  |
| 55 | 412.140356 | 36949294799  |
| 56 | 412.182276 | 39092902939  |
| 57 | 412.398061 | 42836930940  |
| 58 | 412.582670 | 44111407937  |
| 59 | 412.729315 | 42595641933  |
| 60 | 412.812110 | 42073760110  |
| 61 | 412.886585 | 42932633532  |
| 62 | 412.945710 | 42680138671  |
| 63 | 412.994781 | 43349104804  |
| 64 | 413.035099 | 43131544528  |
| 65 | 413.116052 | 44688721618  |
| 66 | 413.317294 | 46310252717  |
| 67 | 413.384626 | 47957066644  |
| 68 | 413.493262 | 50862867674  |
| 69 | 413.557338 | 47550243873  |
| 70 | 413.717419 | 47830426373  |
| 71 | 413.879692 | 49908366039  |
| 72 | 413.927100 | 50782214612  |
| 73 | 414.496827 | 57284376779  |
| 74 | 414.684702 | 62414786182  |
| 75 | 414.705601 | 57879665753  |
| 76 | 414.783880 | 64563064762  |
| 77 | 414.911829 | 62278244140  |
| 78 | 415.063355 | 69306325025  |
| 79 | 415.158665 | 67722534428  |
| 80 | 415.360764 | 72349747664  |
| 81 | 415.463976 | 74317998524  |
| 82 | 415.528806 | 72846129803  |
| 83 | 415.628551 | 75486807055  |
| 84 | 415.732604 | 83395601948  |

---

# Mass Spectrum List Report

---

| #   | m/z        | I               |
|-----|------------|-----------------|
| 85  | 415.783167 | 85728235431     |
| 86  | 415.930001 | 82183143092     |
| 87  | 416.035839 | 89538777858     |
| 88  | 416.048769 | 93623609333     |
| 89  | 416.226601 | 97169546209     |
| 90  | 416.547076 | 114140389986    |
| 91  | 416.878477 | 141520134633    |
| 92  | 416.948401 | 152223365519    |
| 93  | 417.155965 | 189777176546    |
| 94  | 417.274499 | 205331079785    |
| 95  | 417.657888 | 350077549111    |
| 96  | 418.162948 | 205852206981627 |
| 97  | 419.166354 | 34517495021950  |
| 98  | 419.224784 | 455137040550    |
| 99  | 419.416051 | 164131936423    |
| 100 | 419.641846 | 133220533012    |
| 101 | 419.668302 | 129703325624    |
| 102 | 419.845036 | 121106552736    |
| 103 | 419.922795 | 118197950380    |
| 104 | 419.965263 | 130168142166    |
| 105 | 420.048557 | 128768276958    |
| 106 | 420.169834 | 3855836010915   |
| 107 | 420.480617 | 75207368010     |
| 108 | 420.609448 | 78274521178     |
| 109 | 420.664913 | 75912706094     |
| 110 | 420.739781 | 74532176777     |
| 111 | 420.852334 | 71124497059     |
| 112 | 420.946679 | 68950742690     |
| 113 | 421.101786 | 69401839235     |
| 114 | 421.171016 | 105904139806    |
| 115 | 421.257920 | 66854719534     |
| 116 | 421.301926 | 62338965509     |
| 117 | 421.376474 | 65039440501     |
| 118 | 421.449494 | 62743743079     |
| 119 | 421.623754 | 57171163925     |
| 120 | 421.750383 | 55731991966     |
| 121 | 421.821300 | 54989003641     |
| 122 | 422.057817 | 49062319546     |
| 123 | 422.124398 | 48527344386     |
| 124 | 422.172936 | 51340547667     |
| 125 | 422.253376 | 50573737116     |
| 126 | 422.347393 | 52144966566     |
| 127 | 422.428755 | 51969572681     |
| 128 | 422.491105 | 56000014562     |
| 129 | 422.570584 | 51581292254     |
| 130 | 422.655323 | 46946337324     |
| 131 | 422.757996 | 50918591676     |
| 132 | 422.985439 | 47392397340     |
| 133 | 423.006881 | 43381835381     |
| 134 | 423.015233 | 43819435212     |
| 135 | 423.081484 | 43008966439     |
| 136 | 423.129266 | 43620813954     |
| 137 | 423.350418 | 46931920925     |
| 138 | 423.409232 | 47155866777     |
| 139 | 423.465909 | 43803183714     |
| 140 | 423.551347 | 45515147856     |
| 141 | 423.734359 | 44546575962     |
| 142 | 423.836323 | 37574711474     |
| 143 | 423.861170 | 37440200887     |
| 144 | 423.911430 | 42165355583     |
| 145 | 424.078623 | 42474973349     |
| 146 | 424.110852 | 42538859116     |
| 147 | 424.176539 | 39846395568     |
| 148 | 424.368799 | 43367370452     |

---

## Mass Spectrum List Report

---

| #   | m/z        | I            |
|-----|------------|--------------|
| 149 | 424.571478 | 37437591885  |
| 150 | 424.659163 | 40478563676  |
| 151 | 424.685072 | 39319378538  |
| 152 | 424.849941 | 37545554084  |
| 153 | 424.930998 | 42657082241  |
| 154 | 425.006177 | 37875198433  |
| 155 | 425.127254 | 37724915303  |
| 156 | 425.473872 | 38306884956  |
| 157 | 425.672495 | 39551176695  |
| 158 | 425.772375 | 37480002409  |
| 159 | 425.846748 | 37918609589  |
| 160 | 432.179354 | 123943179098 |
| 161 | 440.145738 | 81474585233  |
| 162 | 446.194411 | 139998442634 |
| 163 | 462.127052 | 343238650760 |
| 164 | 508.583648 | 61976618972  |
| 165 | 536.614454 | 756817591046 |
| 166 | 537.618185 | 132097051975 |
| 167 | 552.609796 | 28849186842  |
| 168 | 564.646275 | 151162331850 |
| 169 | 565.649327 | 29581177993  |
| 170 | 592.677831 | 247311187018 |
| 171 | 593.681009 | 41579293564  |
| 172 | 603.285468 | 28306381949  |
| 173 | 635.230930 | 155124151743 |
| 174 | 637.247062 | 34087056389  |
| 175 | 687.343917 | 37160958192  |
| 176 | 777.307835 | 121433546683 |
| 177 | 904.979703 | 213138073780 |
| 178 | 929.044077 | 29397931450  |



JDH-1-145 (CDC13, 400MHz) pure white solid - Saponification of 4 methoxyphenyl quinoline deriv

NAME JDH-1-145  
EXPNO 90  
PROCNO 1  
Date\_ 20170628  
Time\_ 19.06 h  
INSTRUM spect  
PROBHD Z108618\_0161 (   
PULPROG zg30  
TD 65536  
SOLVENT CDC13  
NS 32  
DS 2  
SWH 8012.820 Hz  
FIDRES 0.244532 Hz  
AQ 4.0894966 sec  
RG 203  
DW 62.400 usec  
DE 6.50 usec  
TE 297.6 K  
D1 1.00000000 sec  
TD0 1  
SFO1 400.1724710 MHz  
NUC1 1H  
P1 9.88 usec  
SI 65536  
SF 400.1700086 MHz  
WDW EM  
SSB 0  
LB 0.30 Hz  
GB 0  
PC 1.00

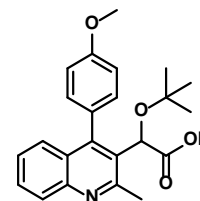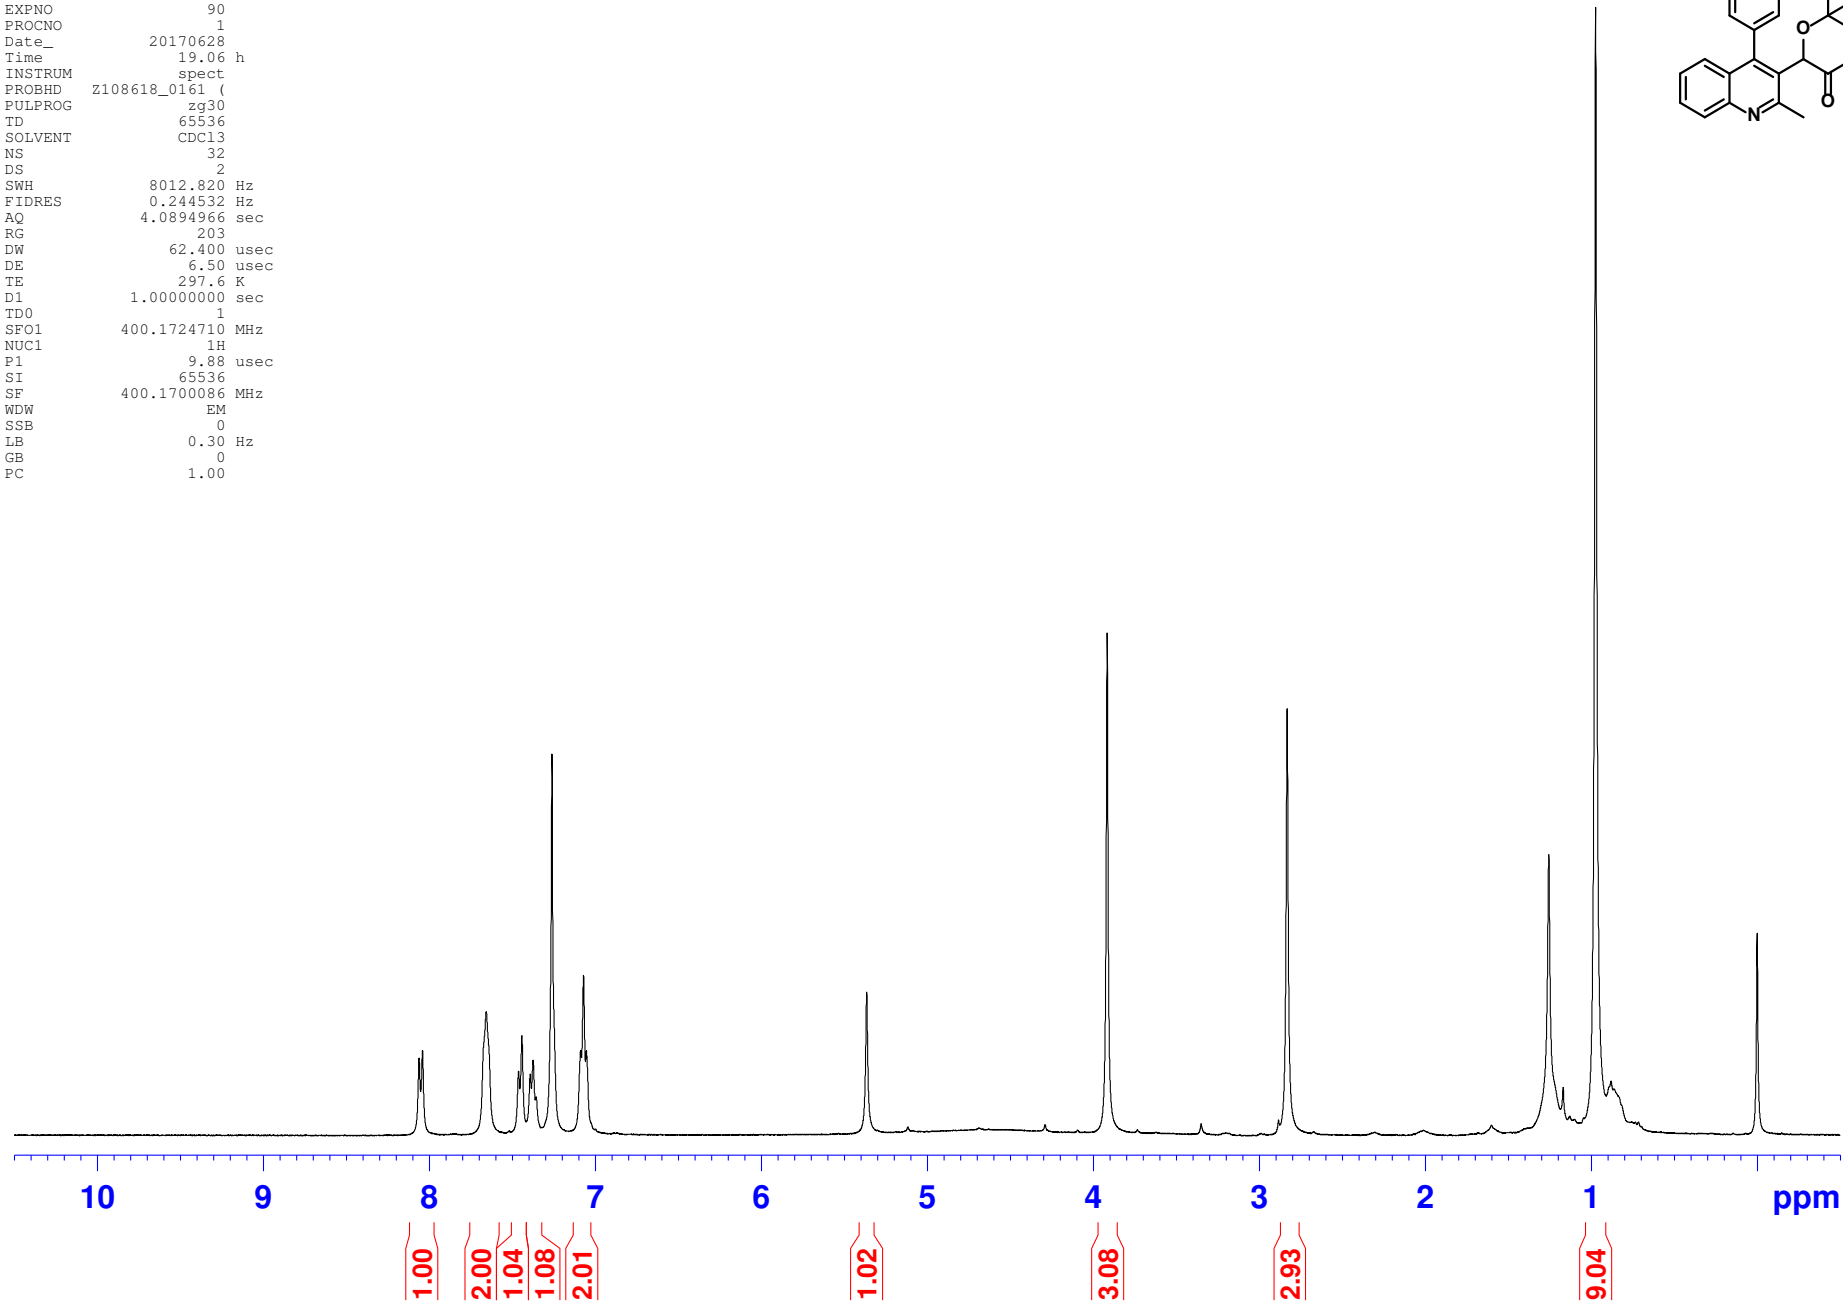

JDH-1-145 (CDCl<sub>3</sub>, 400MHz) pure white solid - Saponification of 4 methoxyphenyl quinoline derivative

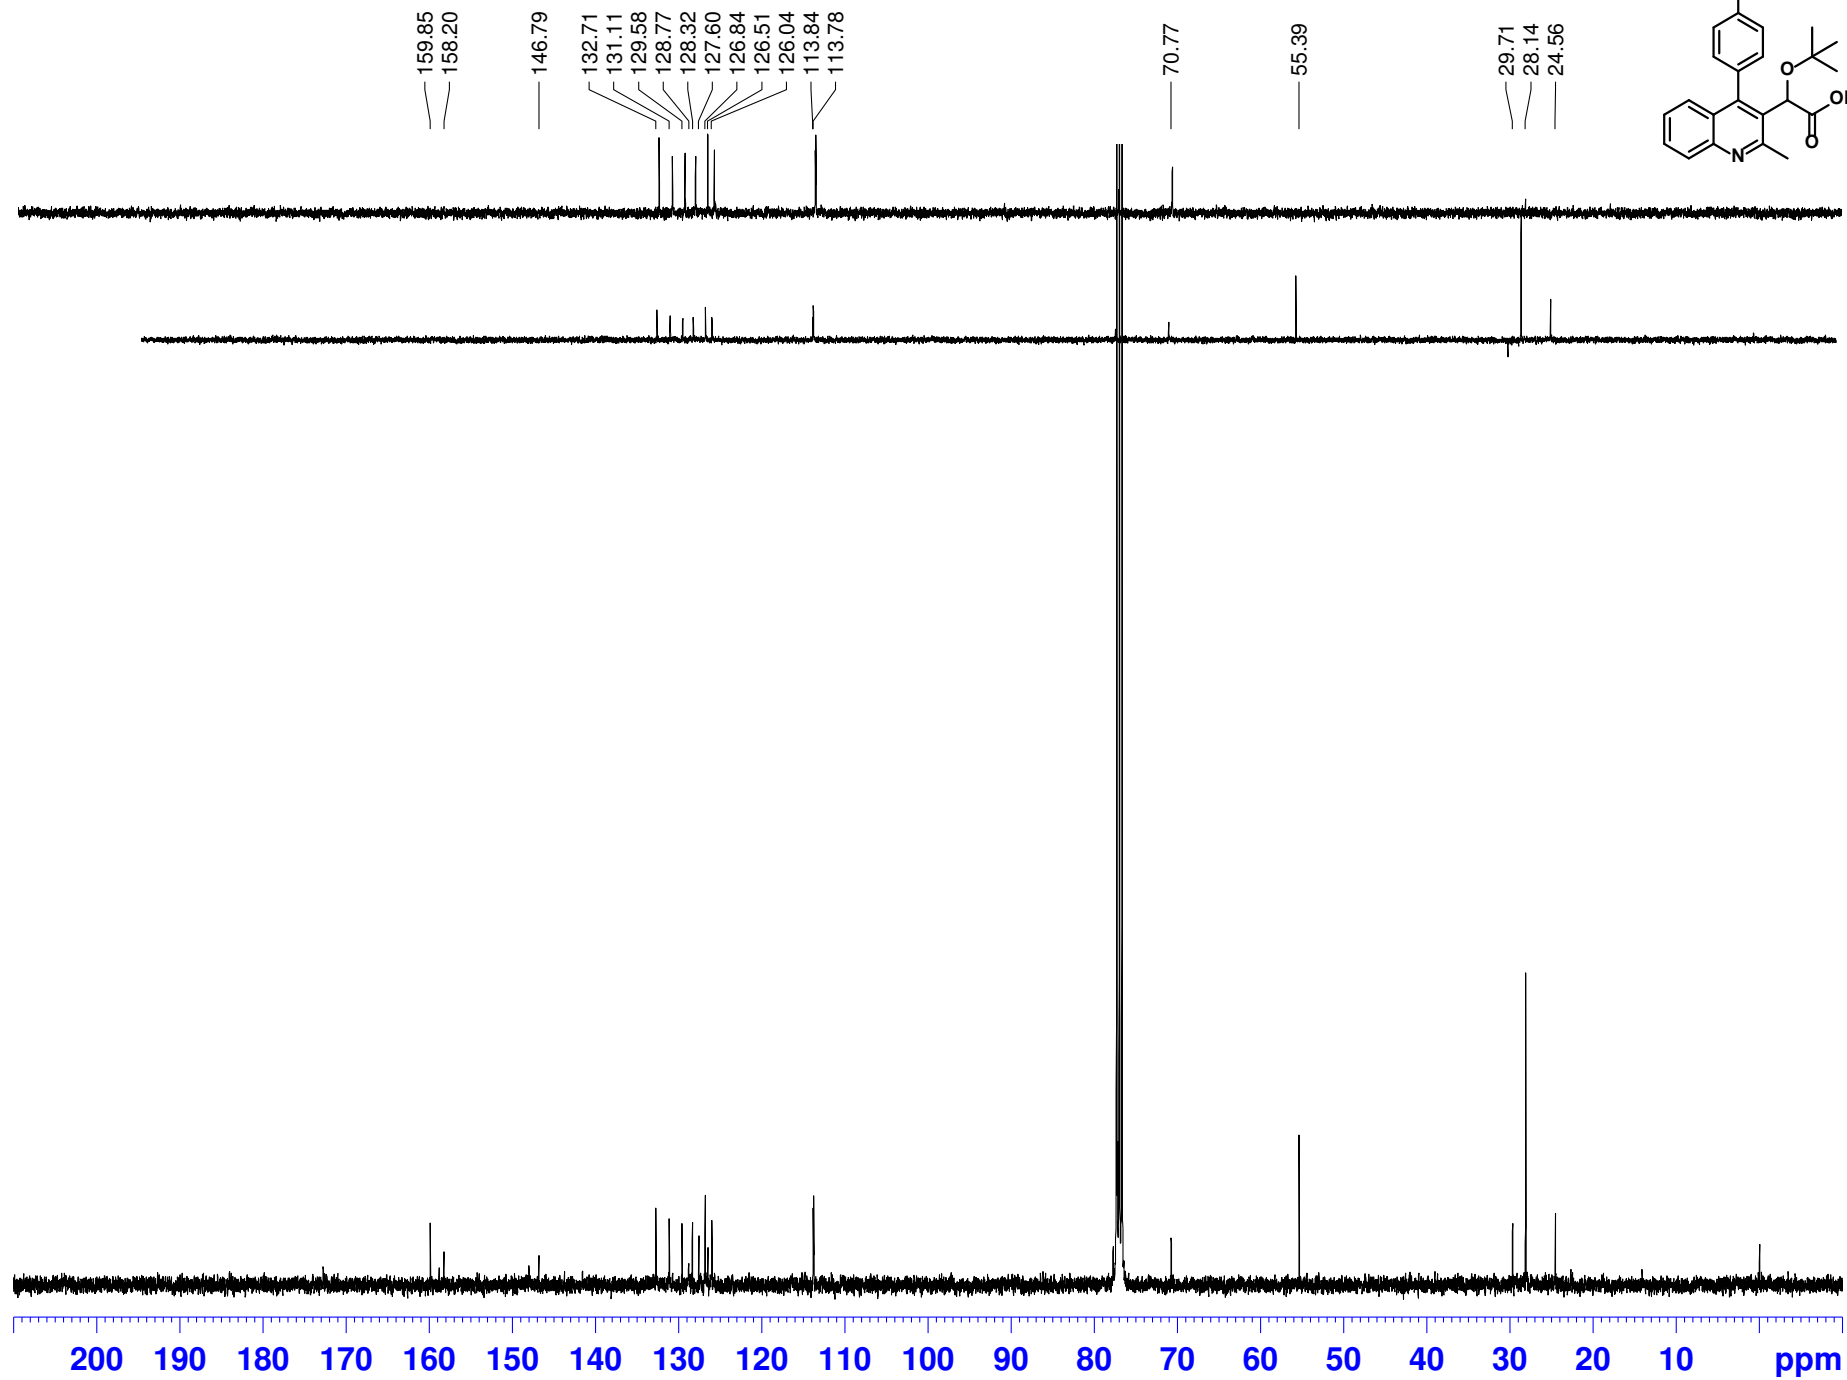

JDH-1-140 (CDC13, 400MHz) pure white solid - Saponification of 4 trifluoromethoxyphenyl quinoline derivative

NAME JDH-1-140  
EXPNO 80  
PROCNO 1  
Date\_ 20170626  
Time\_ 19.30 h  
INSTRUM spect  
PROBHD Z108618\_0161 (  
PULPROG zg30  
TD 65536  
SOLVENT CDC13  
NS 16  
DS 2  
SWH 8012.820 Hz  
FIDRES 0.244532 Hz  
AQ 4.0894966 sec  
RG 161  
DW 62.400 usec  
DE 6.50 usec  
TE 297.6 K  
D1 1.00000000 sec  
TD0 1  
SF01 400.1724710 MHz  
NUC1 1H  
P1 9.88 usec  
SI 65536  
SF 400.1700083 MHz  
WDW EM  
SSB 0  
LB 0.30 Hz  
GB 0  
PC 1.00

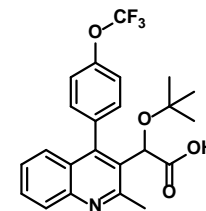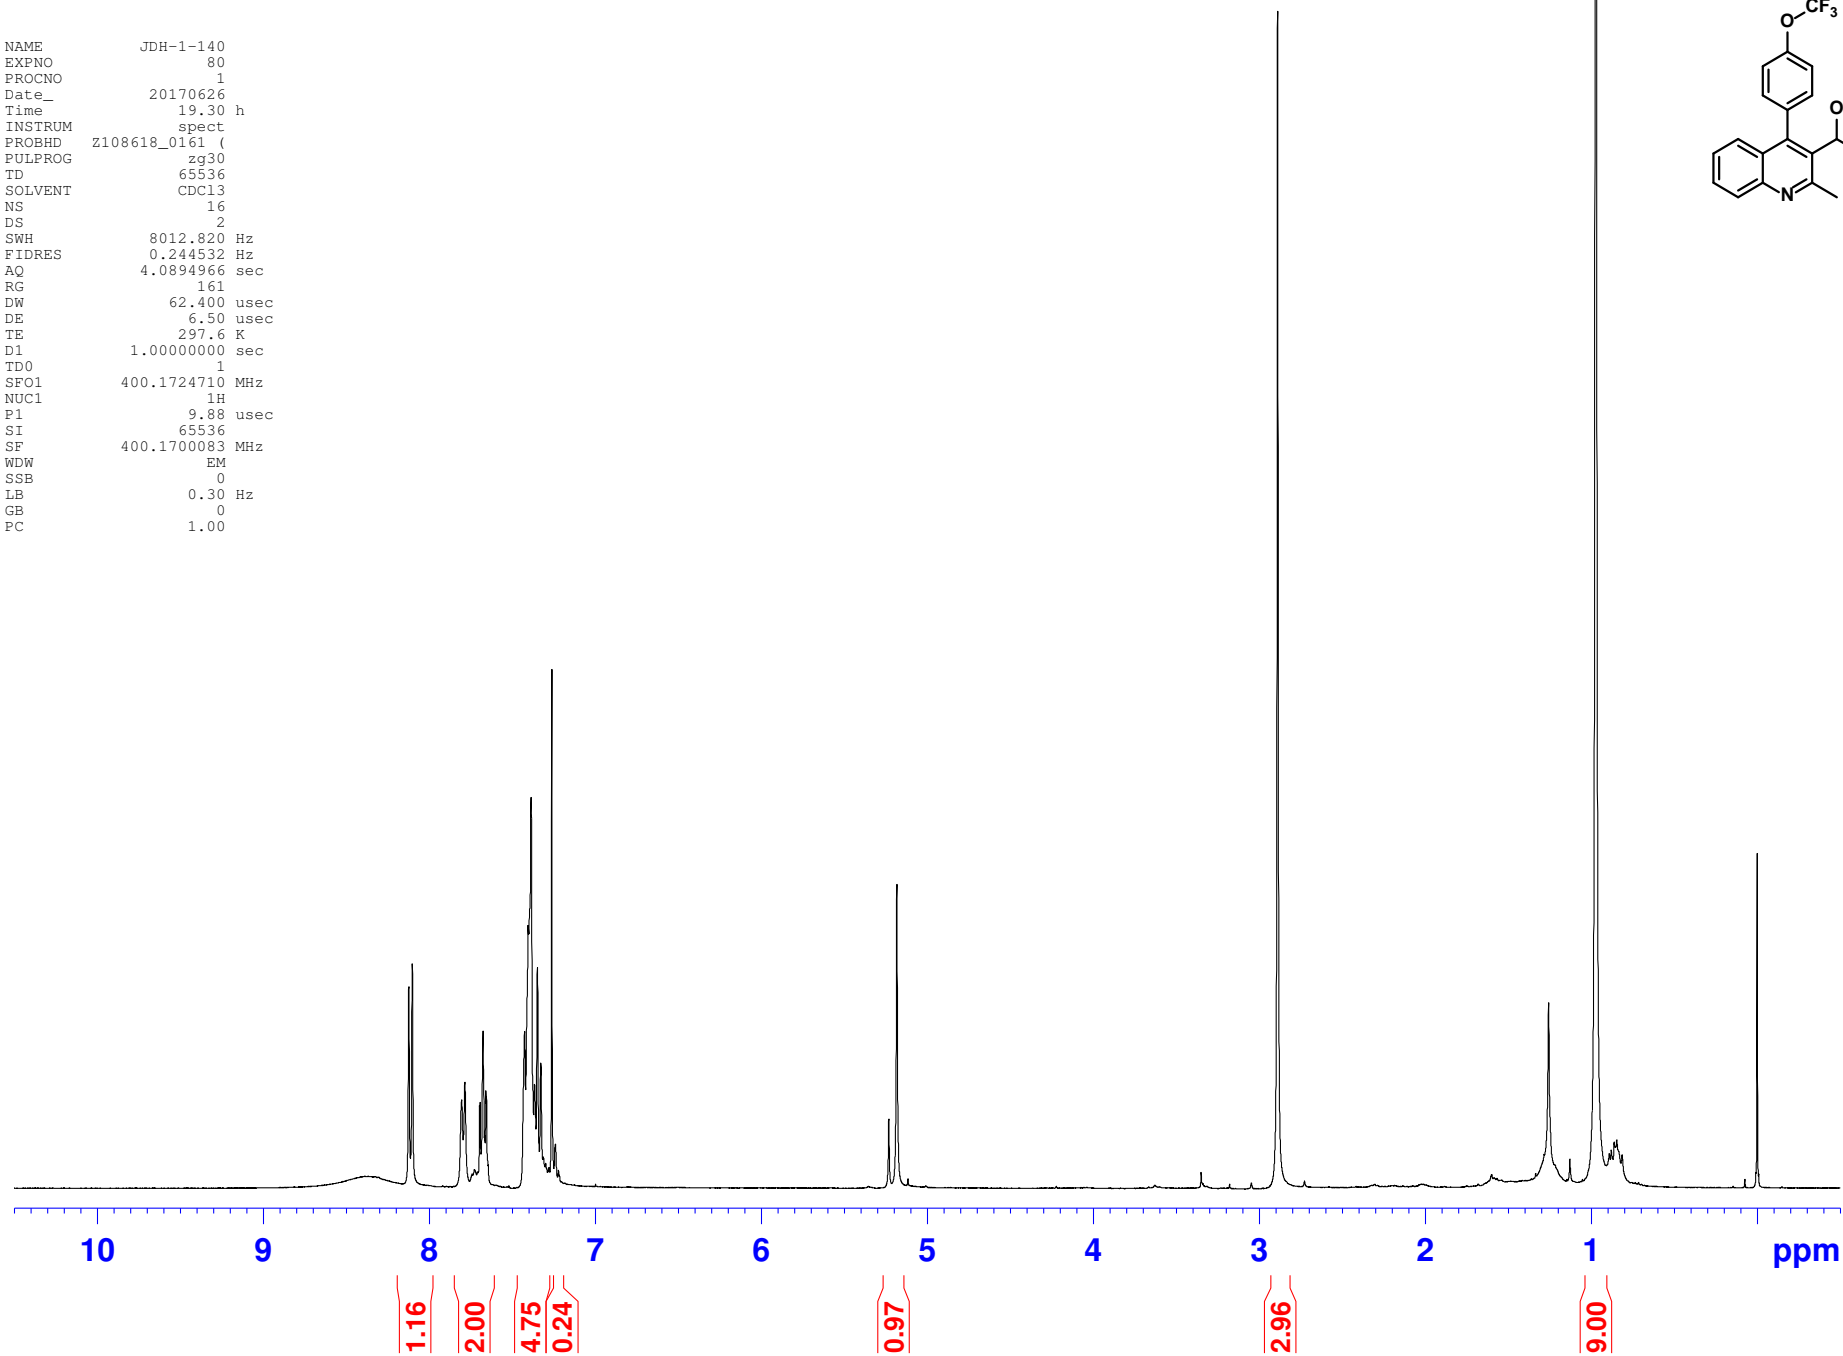

JDH-1-140 (CDCl<sub>3</sub>, 400MHz) pure white solid - Saponification of 4 trifluoromethoxyphenyl quinoline derivative

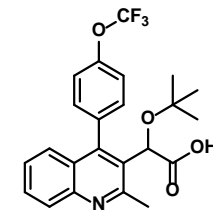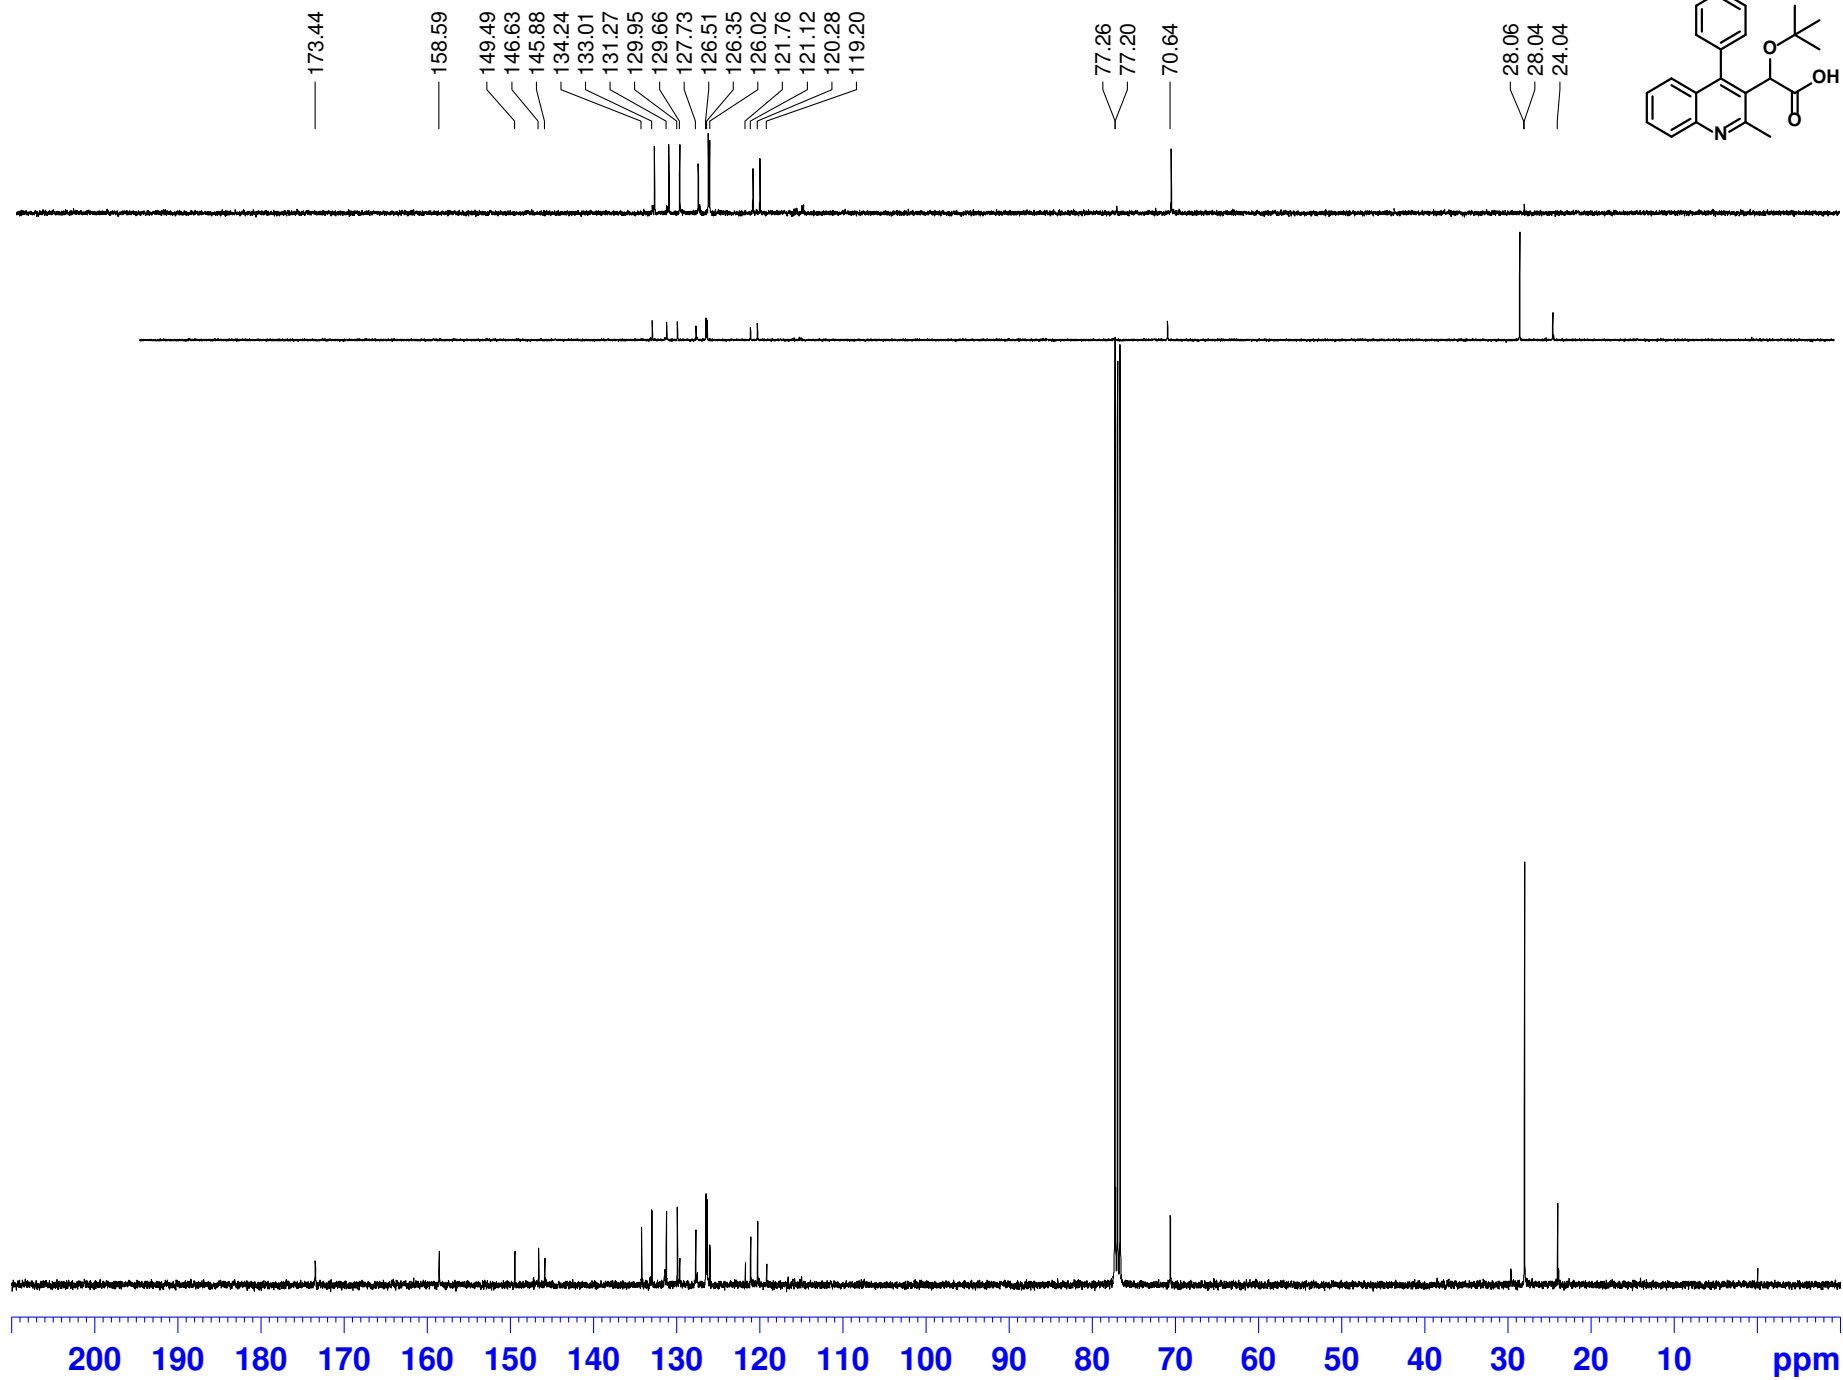

JDH-1-151 (CDC13, 400MHz) light yellow solid - Saponification of 4 thiomethylphenyl quinoline derivative

NAME JDH-1-151  
EXPNO 60  
PROCNO 1  
Date\_ 20170712  
Time\_ 22.51 h  
INSTRUM spect  
PROBHD Z108618\_0161 (  
PULPROG zg30  
TD 65536  
SOLVENT CDC13  
NS 48  
DS 2  
SWH 8012.820 Hz  
FIDRES 0.244532 Hz  
AQ 4.0894966 sec  
RG 128  
DW 62.400 usec  
DE 6.50 usec  
TE 297.6 K  
D1 1.0000000 sec  
TD0 1  
SFO1 400.1724710 MHz  
NUC1 1H  
P1 9.88 usec  
SI 65536  
SF 400.1700076 MHz  
WDW EM  
SSB 0  
LB 0.30 Hz  
GB 0  
PC 1.00

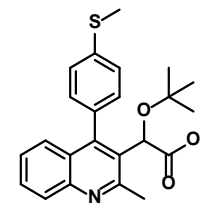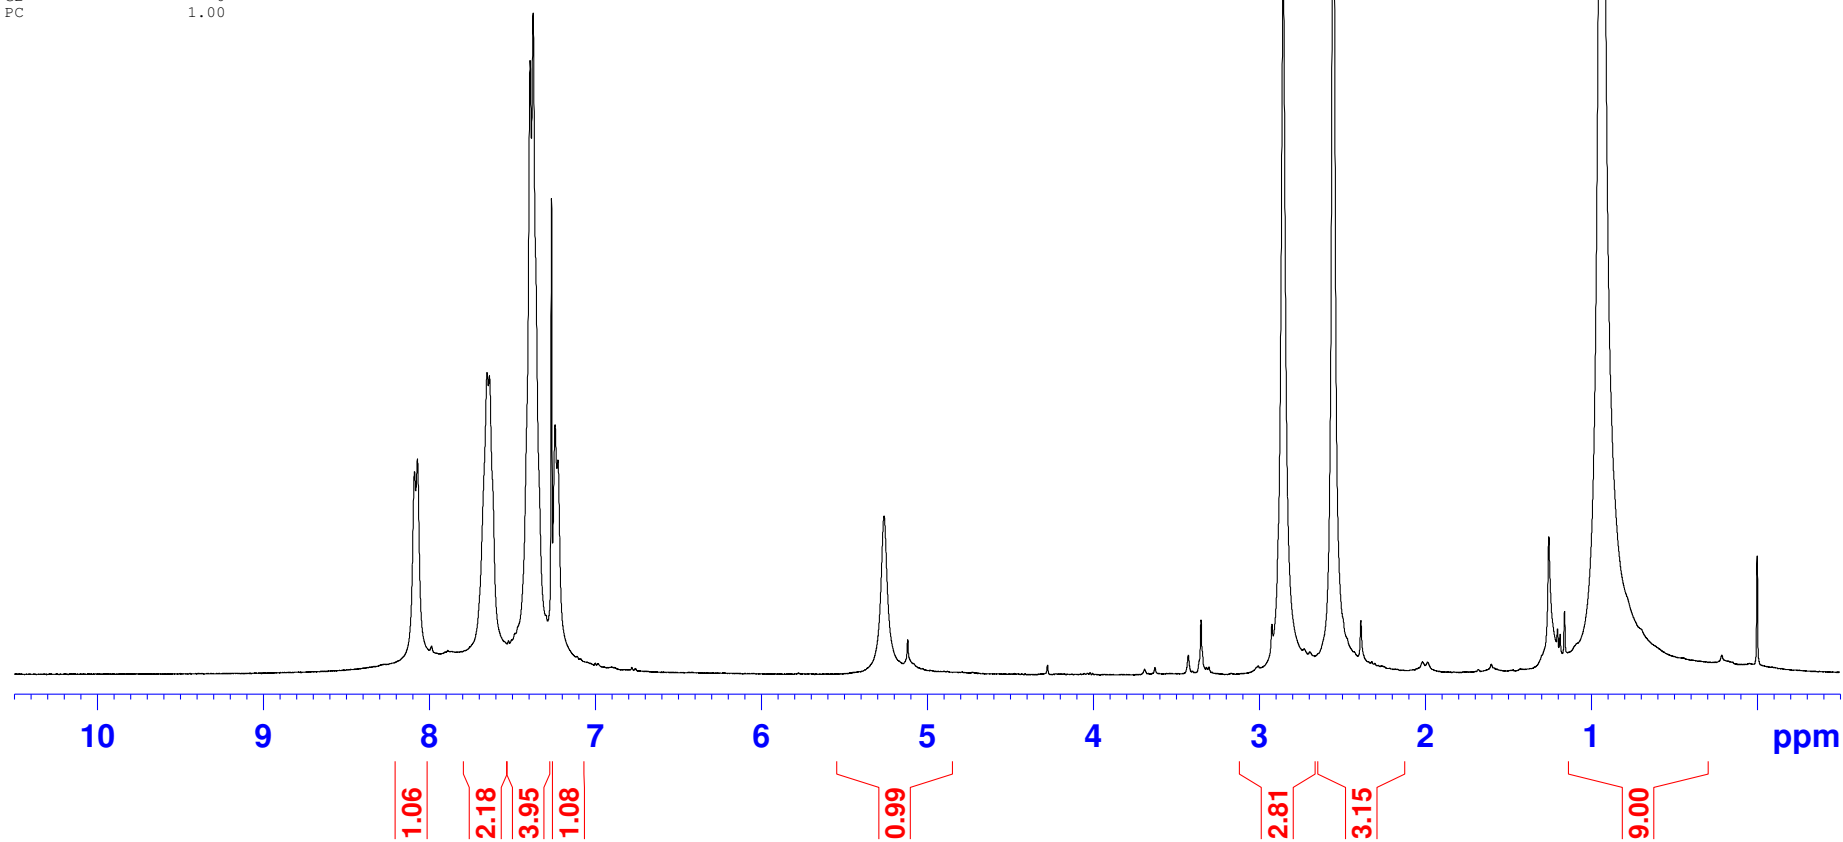



NGJ-8-094 (CDC13, 400 MHz) Sample Check

NAME NGJ-8-094  
 EXPNO 50  
 PROCNO 1  
 Date\_ 20171129  
 Time\_ 17.15 h  
 INSTRUM spect  
 PROBHD Z108618\_0161 ( )  
 PULPROG zg30  
 TD 65536  
 SOLVENT CDC13  
 NS 16  
 DS 2  
 SWH 8012.820 Hz  
 FIDRES 0.244532 Hz  
 AQ 4.0894966 sec  
 RG 203  
 DW 62.400 usec  
 DE 6.50 usec  
 TE 298.3 K  
 D1 1.00000000 sec  
 TD0 1  
 SF01 400.1724710 MHz  
 NUC1 1H  
 P1 9.88 usec  
 SI 65536  
 SF 400.1700084 MHz  
 WDW EM  
 SSB 0  
 LB 0.30 Hz  
 GB 0  
 PC 1.00

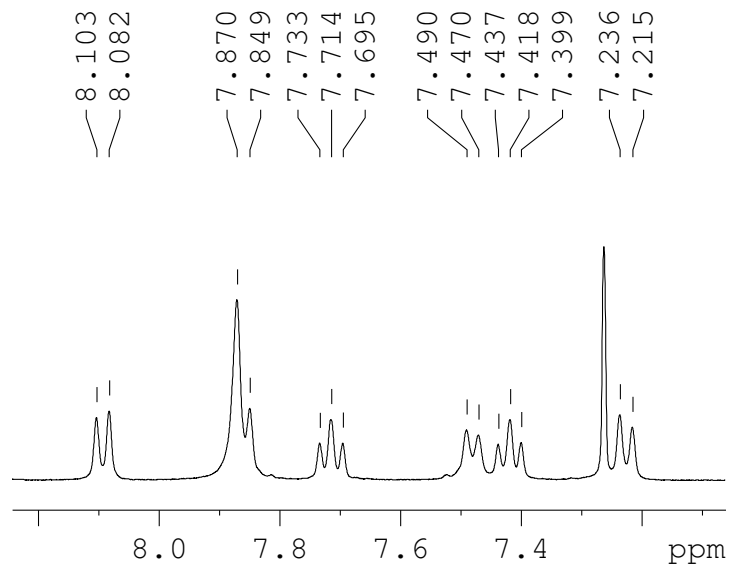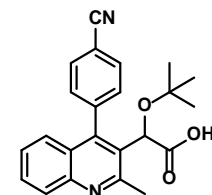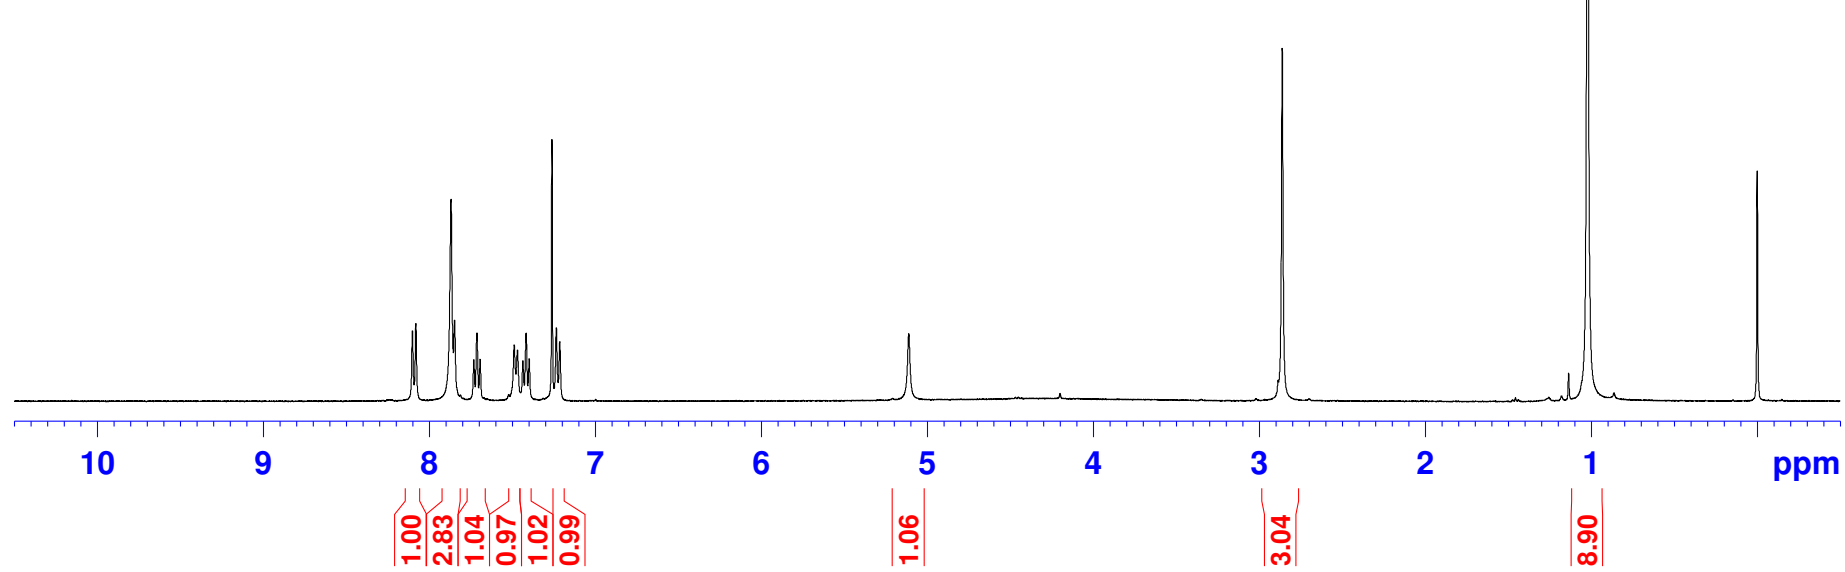

NGJ-8-094 (CDC13, 400 MHz) Black Oil - saponification of 4-cyanoquinoline

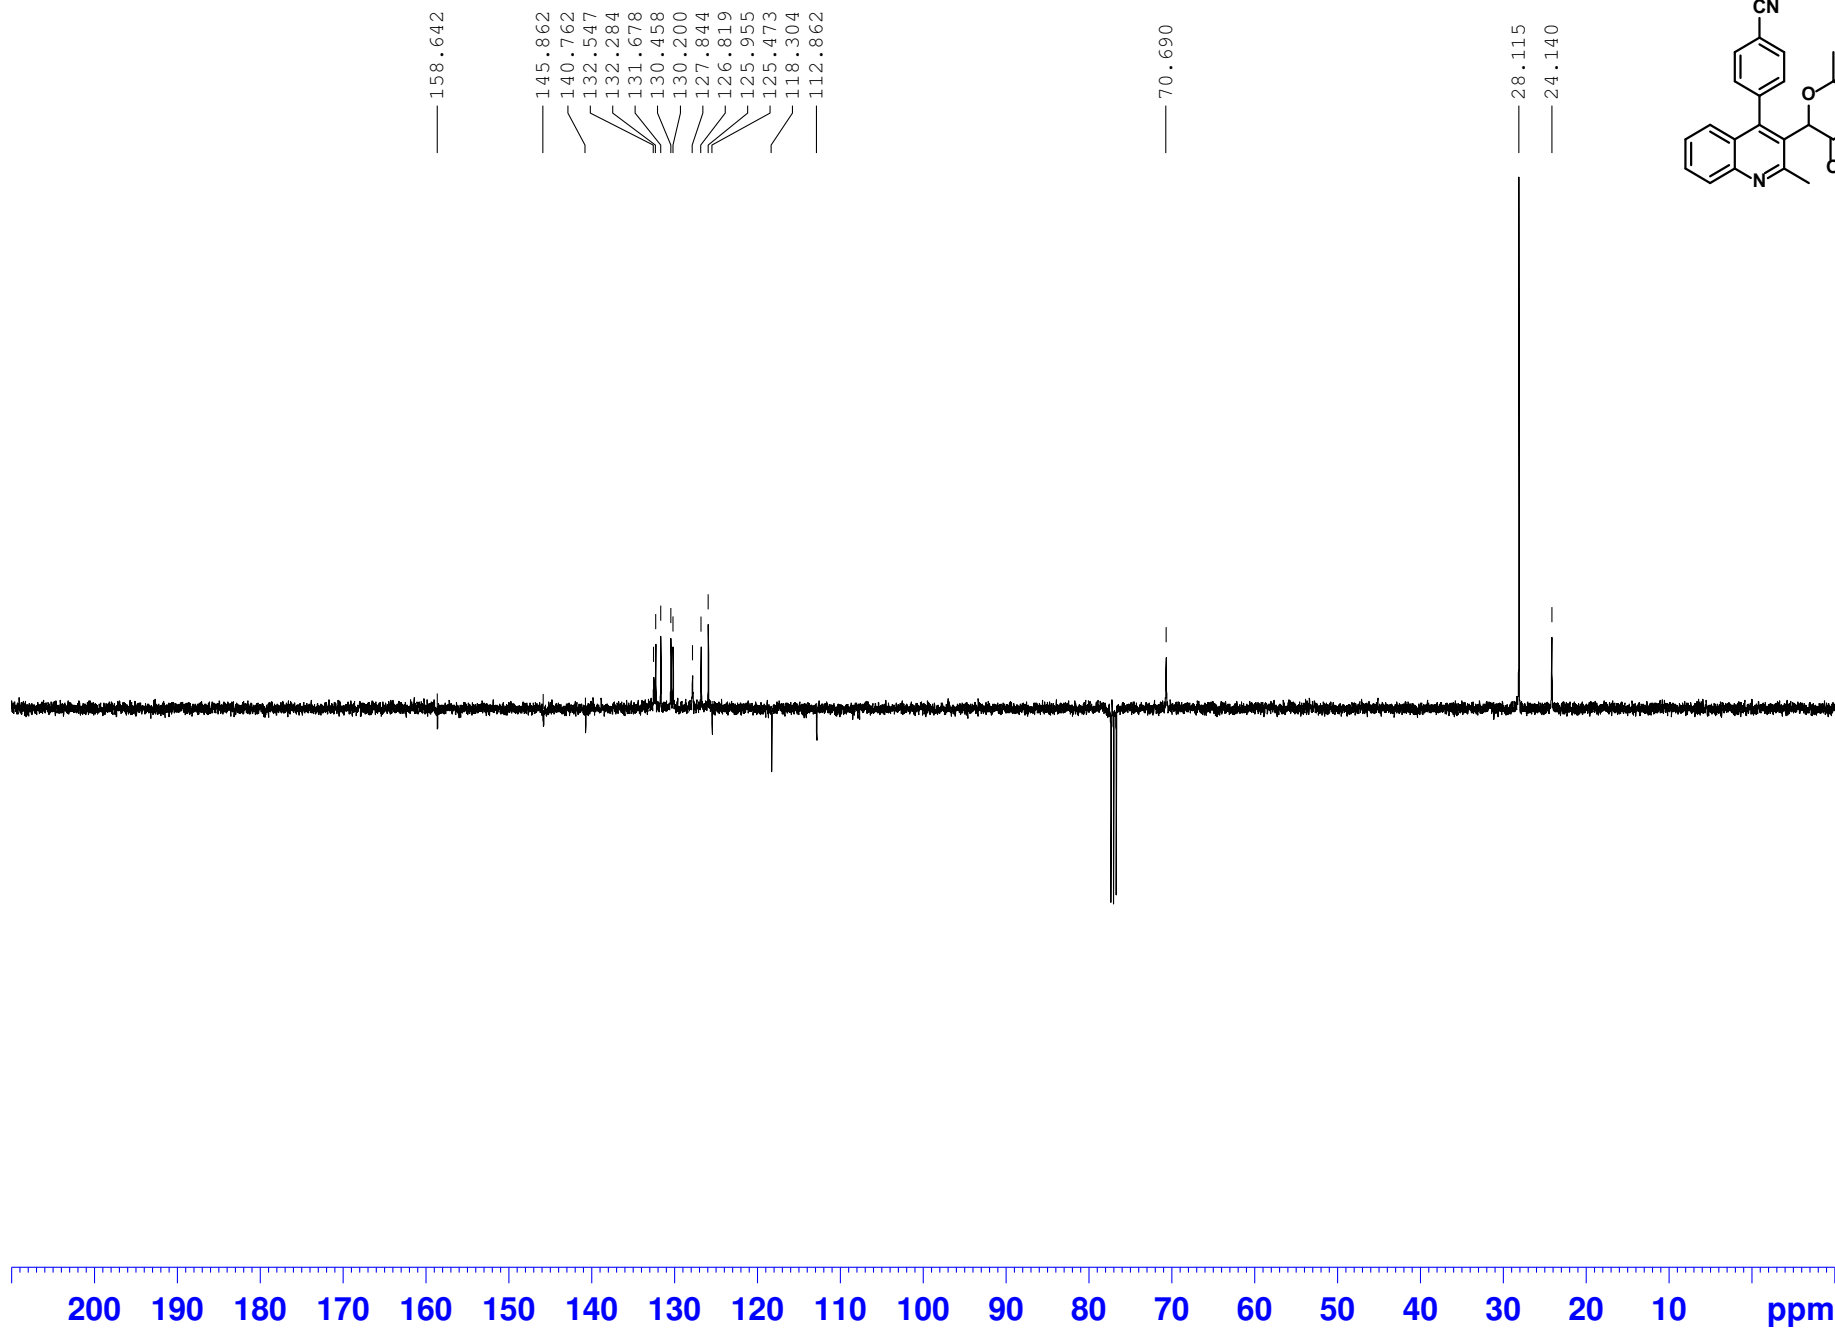



# Mass Spectrum List Report

## Analysis Info

Analysis Name F:\MS1-091514 - 080917\Data\apexdata031918\NGJ-9-094\_pos\_000001.d  
Method  
Sample Name NGJ-9-094  
Comment NGJ-9-094 in THF:MeOH C23H22N2O3 H+

Acquisition Date 3/19/2018 3:42:13 PM  
Operator FTMS\_USER  
Instrument apex-Qe

Sample Name NGJ-9-094 in THF:MeOH  
Exact Mass of C23H22N2O3 H+ = 375.170319 m/z  
Mass Observed = 375.170547 m/z

Difference < 1.0 ppm

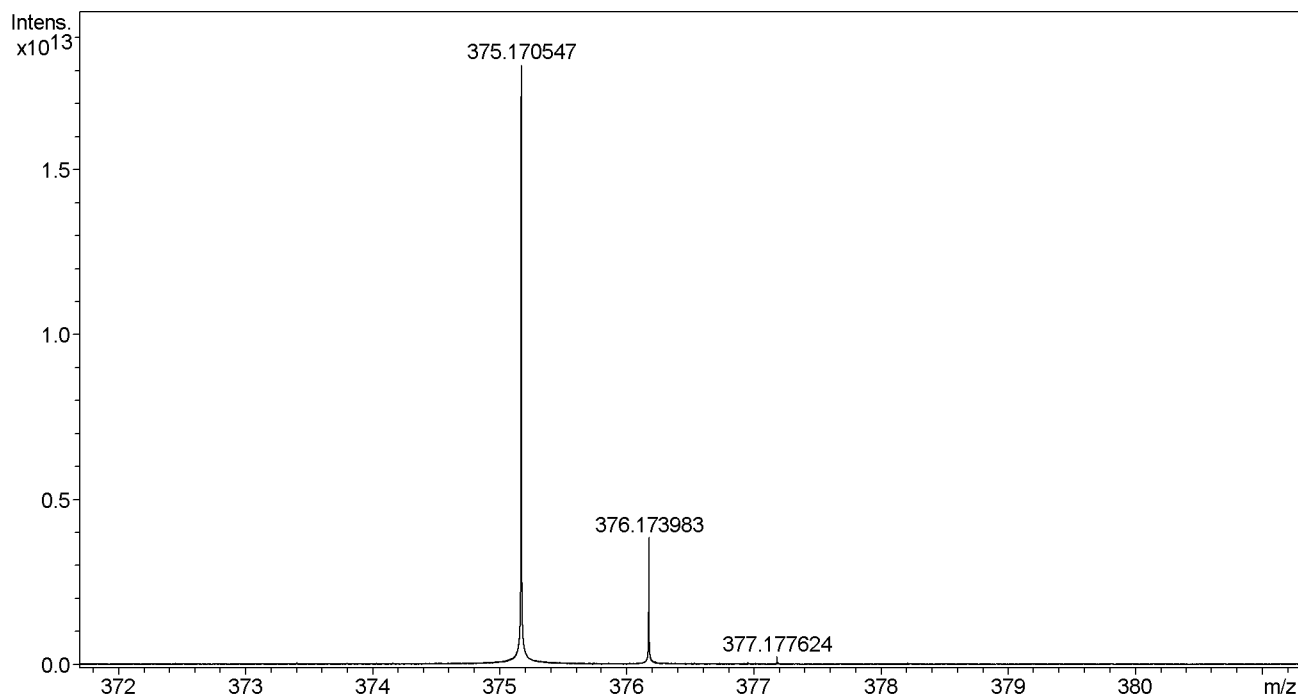

| #  | m/z        | I           |
|----|------------|-------------|
| 1  | 185.385989 | 23073852109 |
| 2  | 187.588024 | 97957911094 |
| 3  | 187.838532 | 33807136073 |
| 4  | 187.961469 | 21830062061 |
| 5  | 188.089777 | 58595629357 |
| 6  | 190.061708 | 55949881016 |
| 7  | 190.213363 | 21448034084 |
| 8  | 191.251623 | 22319569734 |
| 9  | 192.397584 | 20942887410 |
| 10 | 193.254642 | 21427949610 |
| 11 | 193.370933 | 21480802824 |
| 12 | 194.814010 | 21941070037 |
| 13 | 196.658534 | 25972283640 |
| 14 | 198.871775 | 23482264301 |
| 15 | 199.892133 | 21664788799 |
| 16 | 201.839201 | 24319920694 |
| 17 | 202.340530 | 37456935998 |
| 18 | 202.452708 | 21320211202 |
| 19 | 204.734699 | 22266730938 |
| 20 | 204.760268 | 21675668191 |

---

# Mass Spectrum List Report

---

| #  | m/z        | I            |
|----|------------|--------------|
| 21 | 206.444421 | 23563794021  |
| 22 | 206.454515 | 22609266981  |
| 23 | 206.903000 | 21094620796  |
| 24 | 207.611979 | 21120048614  |
| 25 | 209.442036 | 65341534790  |
| 26 | 210.294538 | 21793494921  |
| 27 | 211.016024 | 21330281874  |
| 28 | 214.563635 | 21058830270  |
| 29 | 215.256545 | 21608005730  |
| 30 | 218.533361 | 21300026015  |
| 31 | 224.638598 | 22510599324  |
| 32 | 226.685284 | 22485192860  |
| 33 | 228.319389 | 22748794637  |
| 34 | 229.259876 | 21793560113  |
| 35 | 231.120605 | 24551897993  |
| 36 | 231.249270 | 21721442831  |
| 37 | 234.240530 | 24444849946  |
| 38 | 236.077457 | 23733648508  |
| 39 | 238.285246 | 23742717950  |
| 40 | 239.160566 | 23188360231  |
| 41 | 240.532661 | 21296044015  |
| 42 | 241.725090 | 21592673813  |
| 43 | 244.540323 | 21487663043  |
| 44 | 244.979907 | 21181496375  |
| 45 | 247.498693 | 24061499203  |
| 46 | 252.377340 | 22209552497  |
| 47 | 256.473782 | 21518946123  |
| 48 | 257.107147 | 22737011479  |
| 49 | 258.078847 | 26808775224  |
| 50 | 259.312210 | 21701309682  |
| 51 | 260.127335 | 21412508466  |
| 52 | 265.729922 | 29496331472  |
| 53 | 266.925075 | 74852005161  |
| 54 | 268.071124 | 22083479378  |
| 55 | 276.440396 | 21801777371  |
| 56 | 278.406018 | 23574853270  |
| 57 | 281.969881 | 23365405164  |
| 58 | 282.598455 | 24623632058  |
| 59 | 286.856567 | 22041745677  |
| 60 | 293.618604 | 21492192500  |
| 61 | 294.196392 | 23835928686  |
| 62 | 295.260426 | 22845359353  |
| 63 | 302.918101 | 21349142018  |
| 64 | 304.162948 | 24418663766  |
| 65 | 305.301793 | 22515741415  |
| 66 | 306.396268 | 22812657202  |
| 67 | 310.336887 | 23333027295  |
| 68 | 311.877512 | 22869444938  |
| 69 | 313.434914 | 21862192741  |
| 70 | 313.743828 | 21733999027  |
| 71 | 313.926386 | 26022680994  |
| 72 | 320.128338 | 30132408932  |
| 73 | 327.986001 | 24400171433  |
| 74 | 330.434479 | 23654548878  |
| 75 | 331.180888 | 734083473148 |
| 76 | 331.202891 | 22784699100  |
| 77 | 331.235824 | 22433202809  |
| 78 | 332.184337 | 128317509935 |
| 79 | 335.831993 | 25332789767  |
| 80 | 337.300316 | 23289926700  |
| 81 | 341.131146 | 25400537205  |
| 82 | 347.580648 | 25358527939  |
| 83 | 349.166584 | 27315637167  |
| 84 | 350.176950 | 215904432368 |

---

# Mass Spectrum List Report

---

| #   | m/z        | I              |
|-----|------------|----------------|
| 85  | 355.753586 | 22782699597    |
| 86  | 361.740061 | 27258037167    |
| 87  | 363.170702 | 28249141146    |
| 88  | 368.350261 | 24975307290    |
| 89  | 372.457130 | 29347393833    |
| 90  | 373.109913 | 23414291211    |
| 91  | 373.336890 | 23087907789    |
| 92  | 373.407327 | 45298230059    |
| 93  | 373.563163 | 23833254613    |
| 94  | 373.802288 | 25349732754    |
| 95  | 373.895671 | 24353208340    |
| 96  | 373.943856 | 23131435477    |
| 97  | 373.994687 | 23129824430    |
| 98  | 374.033130 | 25922530474    |
| 99  | 374.085946 | 23626052945    |
| 100 | 374.162007 | 31812578262    |
| 101 | 374.266191 | 24754399307    |
| 102 | 374.290602 | 24517947535    |
| 103 | 374.314644 | 24375995260    |
| 104 | 374.361450 | 23718004998    |
| 105 | 374.366422 | 24455180234    |
| 106 | 374.418853 | 25707984678    |
| 107 | 374.449005 | 25776695420    |
| 108 | 374.518630 | 32915637328    |
| 109 | 374.530404 | 33453618655    |
| 110 | 374.542064 | 34308399947    |
| 111 | 374.560889 | 24077411381    |
| 112 | 374.619305 | 35371271412    |
| 113 | 374.659542 | 40859331568    |
| 114 | 374.695383 | 33073445551    |
| 115 | 374.715472 | 40306493505    |
| 116 | 374.733036 | 37244741071    |
| 117 | 374.767878 | 37003482847    |
| 118 | 374.779792 | 38901464907    |
| 119 | 374.832733 | 43397762576    |
| 120 | 374.932092 | 63606410502    |
| 121 | 374.964116 | 72163471641    |
| 122 | 375.004048 | 83376875965    |
| 123 | 375.170547 | 18171793133651 |
| 124 | 375.420893 | 53327949600    |
| 125 | 375.458710 | 49437509136    |
| 126 | 375.471654 | 48700024946    |
| 127 | 375.535686 | 39973797909    |
| 128 | 375.572058 | 35823170535    |
| 129 | 375.596625 | 35336672838    |
| 130 | 375.630364 | 34853229794    |
| 131 | 375.652196 | 33063274432    |
| 132 | 375.700436 | 33963553413    |
| 133 | 375.736419 | 30369975021    |
| 134 | 375.779049 | 31289363452    |
| 135 | 375.843961 | 32639284899    |
| 136 | 375.853031 | 32306399347    |
| 137 | 375.886239 | 24860599273    |
| 138 | 376.022204 | 30084635524    |
| 139 | 376.049187 | 26908214435    |
| 140 | 376.111172 | 43025467921    |
| 141 | 376.173983 | 3832243834652  |
| 142 | 376.232695 | 61291613062    |
| 143 | 376.290050 | 38945367992    |
| 144 | 376.315021 | 36503591528    |
| 145 | 376.379668 | 31337501669    |
| 146 | 376.456931 | 26584069299    |
| 147 | 376.505944 | 27053749484    |
| 148 | 376.533870 | 28791472417    |

# Mass Spectrum List Report

| #   | m/z        | I             |
|-----|------------|---------------|
| 149 | 376.731057 | 25720893756   |
| 150 | 376.921102 | 30094756866   |
| 151 | 376.950629 | 51510446905   |
| 152 | 377.013572 | 30996574383   |
| 153 | 377.062143 | 23317747322   |
| 154 | 377.177624 | 237426847412  |
| 155 | 378.200030 | 23469813417   |
| 156 | 378.206814 | 34535976344   |
| 157 | 384.136558 | 28565947903   |
| 158 | 393.209431 | 29330111033   |
| 159 | 395.146992 | 23798950804   |
| 160 | 397.152878 | 360384498065  |
| 161 | 398.156291 | 51879164699   |
| 162 | 398.242032 | 284769294792  |
| 163 | 399.245478 | 58358741021   |
| 164 | 405.111139 | 25329206997   |
| 165 | 413.212476 | 1182643216037 |
| 166 | 413.267280 | 33778752206   |
| 167 | 414.215955 | 81926005523   |
| 168 | 414.832789 | 23996945296   |
| 169 | 419.134895 | 93356956994   |
| 170 | 420.138030 | 29836704044   |
| 171 | 421.936056 | 28744959567   |
| 172 | 421.988508 | 26442530126   |
| 173 | 422.046095 | 34003616402   |
| 174 | 422.084958 | 39969791745   |
| 175 | 422.106716 | 49604436004   |
| 176 | 422.196675 | 4516590990858 |
| 177 | 422.284279 | 59860394758   |
| 178 | 422.331169 | 36223234575   |
| 179 | 422.357041 | 38595927259   |
| 180 | 422.398793 | 31001239744   |
| 181 | 422.434746 | 32506149007   |
| 182 | 422.461872 | 29558750429   |
| 183 | 422.863934 | 23798608278   |
| 184 | 423.200143 | 1238850902157 |
| 185 | 423.276175 | 28682118834   |
| 186 | 423.397676 | 24260519711   |
| 187 | 424.203562 | 58074321668   |
| 188 | 425.288086 | 59390625692   |
| 189 | 426.207087 | 110666944150  |
| 190 | 427.210196 | 38776102072   |
| 191 | 435.345471 | 46036630000   |
| 192 | 436.348877 | 23918602942   |
| 193 | 440.759043 | 22597850255   |
| 194 | 443.223357 | 118772419663  |
| 195 | 444.178947 | 138374370993  |
| 196 | 445.182445 | 25160675911   |
| 197 | 452.519534 | 22835473351   |
| 198 | 456.110542 | 25818617623   |
| 199 | 477.239487 | 35259352791   |
| 200 | 480.551182 | 56409975388   |
| 201 | 480.734298 | 23800837479   |
| 202 | 481.555025 | 28939240595   |
| 203 | 491.210466 | 35578169193   |
| 204 | 492.794925 | 22695716978   |
| 205 | 493.075577 | 23913301054   |
| 206 | 493.226084 | 883764332108  |
| 207 | 493.337101 | 27174149921   |
| 208 | 494.229537 | 182200506787  |
| 209 | 495.223275 | 192250629732  |
| 210 | 496.226670 | 41468025182   |
| 211 | 497.144981 | 22905524914   |
| 212 | 497.840467 | 23506929463   |

# Mass Spectrum List Report

| #   | m/z        | I             |
|-----|------------|---------------|
| 213 | 501.170555 | 28879718429   |
| 214 | 501.188144 | 25156230210   |
| 215 | 503.918186 | 22414351536   |
| 216 | 508.169413 | 23893183806   |
| 217 | 508.534582 | 25933743521   |
| 218 | 508.582456 | 661504758931  |
| 219 | 509.389963 | 22562632945   |
| 220 | 509.585880 | 181257020329  |
| 221 | 510.589027 | 29484083059   |
| 222 | 515.234149 | 25464932965   |
| 223 | 517.165823 | 40796121370   |
| 224 | 520.582822 | 23570545314   |
| 225 | 522.598305 | 36092075899   |
| 226 | 536.613717 | 2342851789251 |
| 227 | 536.945979 | 23419213228   |
| 228 | 537.032774 | 25870680565   |
| 229 | 537.262426 | 23764428126   |
| 230 | 537.617168 | 850988513076  |
| 231 | 538.620689 | 89563317749   |
| 232 | 539.623960 | 22573345022   |
| 233 | 547.332598 | 23193769348   |
| 234 | 550.291938 | 22934870338   |
| 235 | 550.593488 | 24414615354   |
| 236 | 551.596652 | 23579062195   |
| 237 | 552.119774 | 23011095849   |
| 238 | 552.608925 | 111809570398  |
| 239 | 553.612238 | 32915415382   |
| 240 | 554.443473 | 22748747099   |
| 241 | 556.304652 | 22919673697   |
| 242 | 564.645264 | 690849911653  |
| 243 | 565.648631 | 240583606845  |
| 244 | 580.640608 | 25836507415   |
| 245 | 589.223361 | 38834875180   |
| 246 | 592.676587 | 961166423399  |
| 247 | 592.779825 | 30008311282   |
| 248 | 593.680042 | 328060590334  |
| 249 | 594.252988 | 78926825448   |
| 250 | 594.683415 | 45816601678   |
| 251 | 595.240573 | 63222441330   |
| 252 | 596.243511 | 28528263106   |
| 253 | 603.290757 | 23601830882   |
| 254 | 608.671505 | 30099219676   |
| 255 | 620.708156 | 34171548854   |
| 256 | 627.197982 | 24625295383   |
| 257 | 627.222695 | 22965629072   |
| 258 | 632.098819 | 23008733986   |
| 259 | 632.169093 | 24498684965   |
| 260 | 642.515712 | 23681020691   |
| 261 | 648.739468 | 24242549750   |
| 262 | 649.249863 | 25162902514   |
| 263 | 649.853286 | 22575973560   |
| 264 | 651.053517 | 23689344034   |
| 265 | 658.799251 | 25699511299   |
| 266 | 661.874812 | 23821285737   |
| 267 | 680.153686 | 25599084783   |
| 268 | 685.437027 | 42281322526   |
| 269 | 686.440959 | 35130308826   |
| 270 | 702.872432 | 23490258182   |
| 271 | 708.447344 | 23394680504   |
| 272 | 751.128253 | 25175500151   |
| 273 | 752.060235 | 24457761679   |
| 274 | 765.394150 | 24960438776   |
| 275 | 801.777887 | 28727356878   |
| 276 | 819.469982 | 23760001991   |

---

# Mass Spectrum List Report

---

| #   | m/z        | I           |
|-----|------------|-------------|
| 277 | 845.911570 | 23624316700 |
| 278 | 881.918607 | 23388219911 |
| 279 | 882.502587 | 24727641298 |
| 280 | 914.070428 | 23656622159 |
| 281 | 954.900816 | 23688409468 |
| 282 | 978.999930 | 24585977046 |

NGJ-8-092 (CDC13, 400MHz) Pure Yellow Oil - saponification of 4-acetylphenylquinoline

NAME NGJ-8-092  
 EXPNO 60  
 PROCNO 1  
 Date\_ 20180208  
 Time\_ 20.31 h  
 INSTRUM spect  
 PROBHD Z108618\_0161 (  
 PULPROG zg30  
 TD 65536  
 SOLVENT CDC13  
 NS 16  
 DS 2  
 SWH 8012.820 Hz  
 FIDRES 0.244532 Hz  
 AQ 4.0894966 sec  
 RG 203  
 DW 62.400 usec  
 DE 6.50 usec  
 TE 298.1 K  
 D1 1.00000000 sec  
 TD0 1  
 SF01 400.1724710 MHz  
 NUC1 1H  
 P1 9.88 usec  
 SI 65536  
 SF 400.1700077 MHz  
 WDW EM  
 SSB 0  
 LB 0.30 Hz  
 GB 0  
 PC 1.00

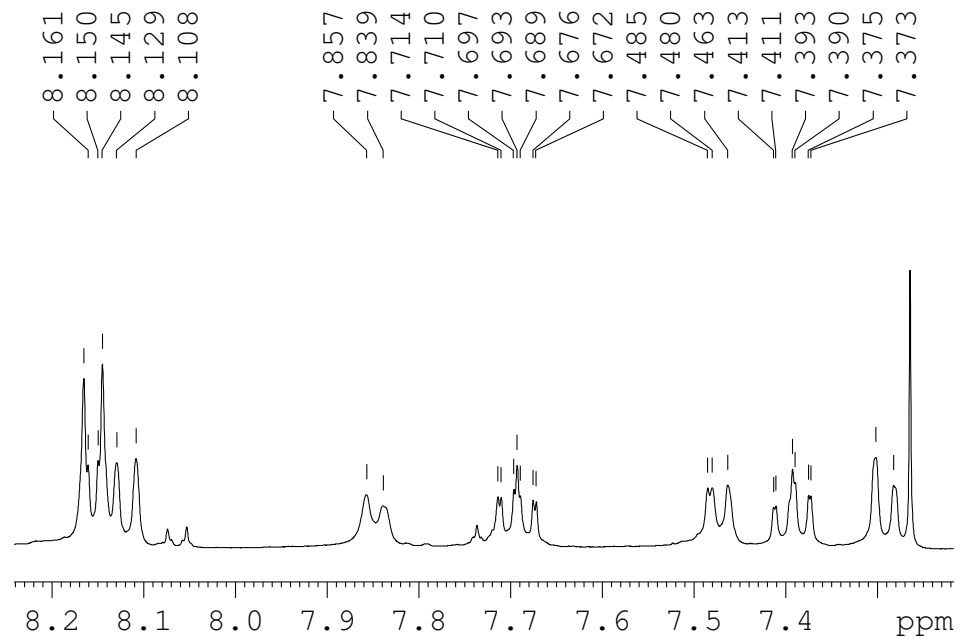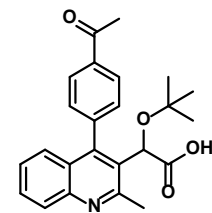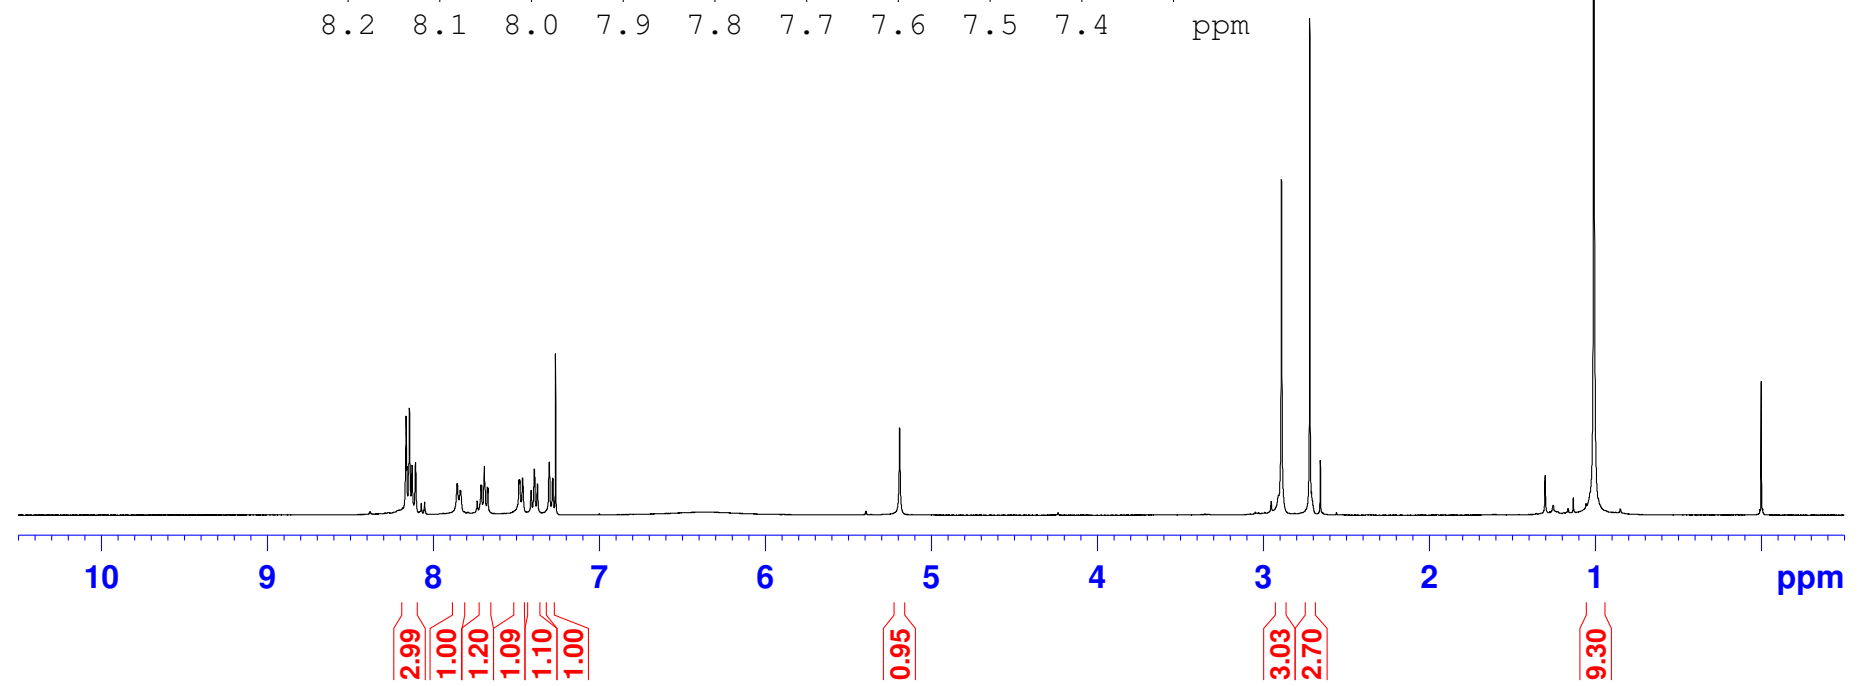

NGJ-8-092 (CDC13, 400MHz) Pure Yellow Oil - saponification of 4-acetylphenylquinoline

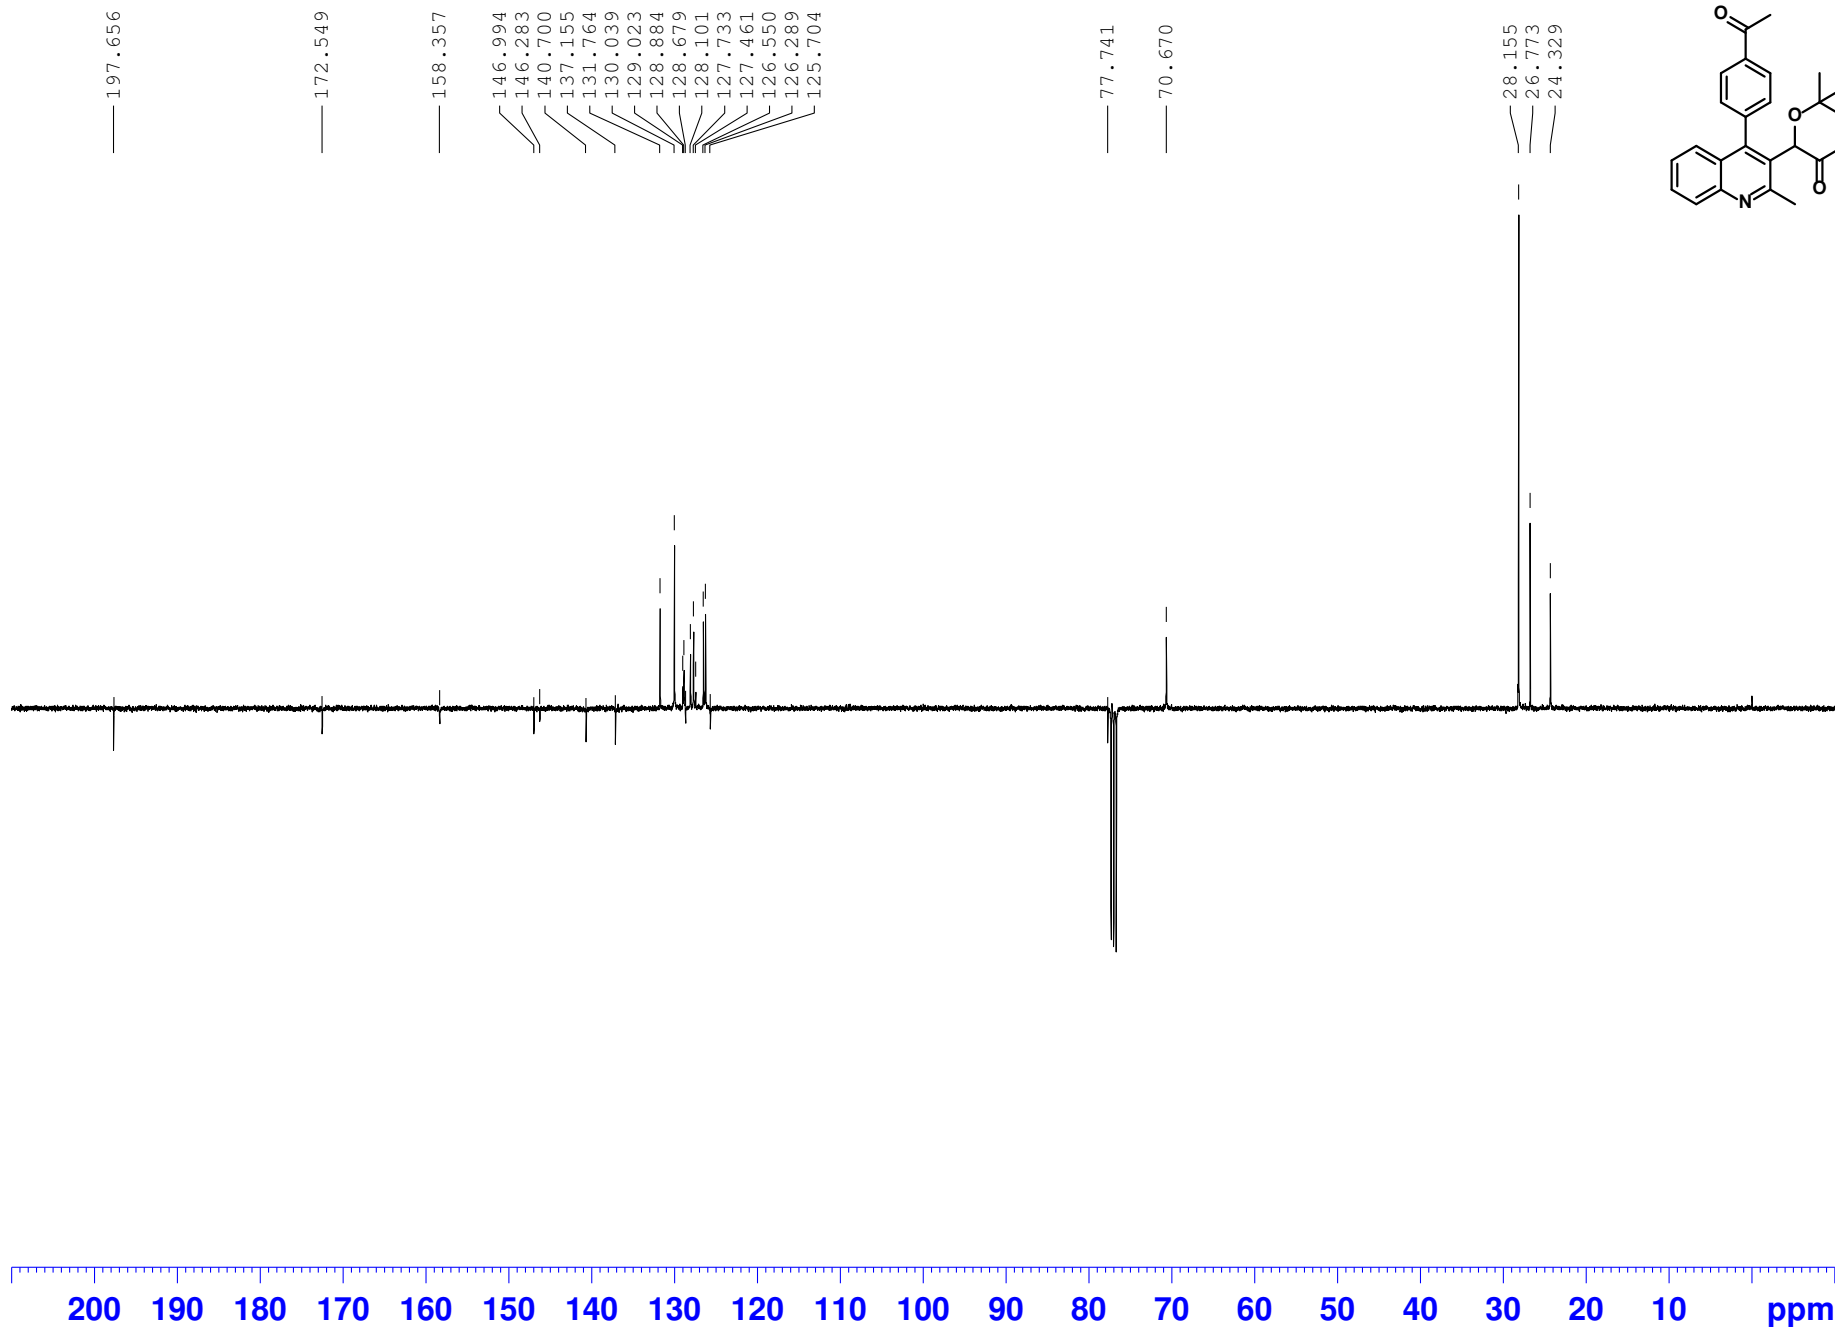



# Mass Spectrum List Report

## Analysis Info

Analysis Name F:\MS1-091514 - 080917\Data\apexdata031918\NGJ-8-092\_pos\_000001.d  
Method  
Sample Name NGJ-8-092  
Comment NGJ-8-092 in THF:MeOH C24H25NO4 H+

Acquisition Date 3/19/2018 12:25:11 PM  
Operator FTMS\_USER  
Instrument apex-Qe

Sample Name NGJ-8-092 in THF:MeOH  
Exact Mass of C24H25NO4 H+ = 392.185635 m/z  
Mass Observed = 392.185845 m/z

Difference < 1.0 ppm

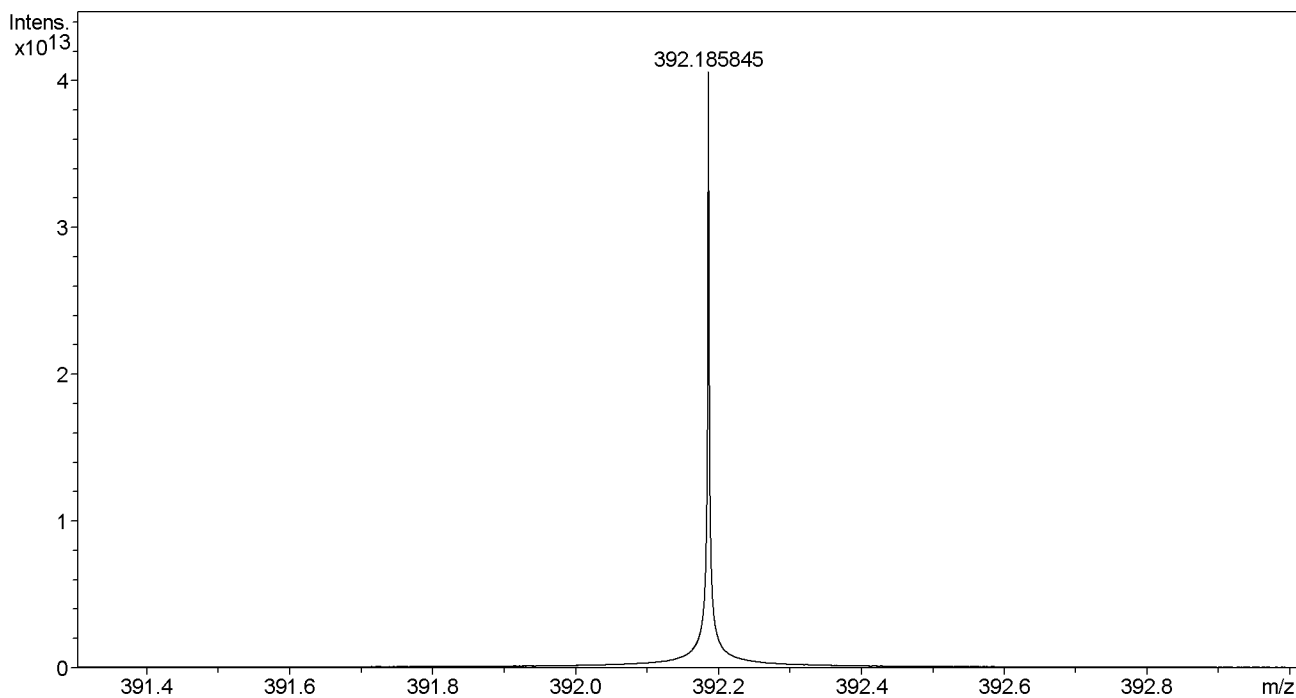

| #  | m/z        | I            |
|----|------------|--------------|
| 1  | 184.313288 | 23432782742  |
| 2  | 187.843246 | 21100986983  |
| 3  | 188.324667 | 21548011890  |
| 4  | 190.061649 | 68656043223  |
| 5  | 192.814914 | 24240196887  |
| 6  | 193.816811 | 22286902836  |
| 7  | 194.840653 | 22839239705  |
| 8  | 195.235908 | 22883549081  |
| 9  | 195.547281 | 21712112763  |
| 10 | 196.075794 | 22774449407  |
| 11 | 196.094871 | 28968895607  |
| 12 | 196.095937 | 186445922968 |
| 13 | 196.597725 | 28523682565  |
| 14 | 196.949359 | 21596644481  |
| 15 | 198.866946 | 21198384015  |
| 16 | 200.431067 | 21548896043  |
| 17 | 202.340456 | 29898630349  |
| 18 | 205.634116 | 22107066985  |
| 19 | 205.896325 | 23169490948  |
| 20 | 207.603198 | 21405889505  |

---

# Mass Spectrum List Report

---

| #  | m/z        | I            |
|----|------------|--------------|
| 21 | 210.231727 | 23684986336  |
| 22 | 211.293206 | 22349782930  |
| 23 | 212.606347 | 21771070977  |
| 24 | 214.662199 | 22489199608  |
| 25 | 215.089343 | 21170593532  |
| 26 | 217.088663 | 23269230553  |
| 27 | 219.104417 | 25381377153  |
| 28 | 219.930807 | 22274232503  |
| 29 | 223.210256 | 22405160679  |
| 30 | 231.104424 | 34331752842  |
| 31 | 233.118921 | 22043407753  |
| 32 | 236.488428 | 22830809488  |
| 33 | 236.732215 | 22225214312  |
| 34 | 237.155793 | 23455280089  |
| 35 | 237.609365 | 21466958177  |
| 36 | 239.053783 | 21769335158  |
| 37 | 241.323809 | 21300537364  |
| 38 | 244.545741 | 21281482315  |
| 39 | 244.997899 | 21463008122  |
| 40 | 246.182707 | 23914111226  |
| 41 | 247.171413 | 22810367485  |
| 42 | 249.110450 | 21277270463  |
| 43 | 253.992631 | 21701673047  |
| 44 | 255.692790 | 23865725502  |
| 45 | 258.431449 | 24914727640  |
| 46 | 264.871238 | 23171348603  |
| 47 | 268.182320 | 21457653686  |
| 48 | 268.312572 | 24578150344  |
| 49 | 271.477985 | 22193884533  |
| 50 | 274.650003 | 21283235431  |
| 51 | 275.094249 | 22942622823  |
| 52 | 275.833598 | 21580077120  |
| 53 | 276.417495 | 23168689687  |
| 54 | 276.969955 | 21795748600  |
| 55 | 278.822432 | 22701743479  |
| 56 | 289.109612 | 31453386150  |
| 57 | 290.117699 | 64528311097  |
| 58 | 291.125372 | 30735719735  |
| 59 | 294.380356 | 21368311028  |
| 60 | 298.167230 | 21499811850  |
| 61 | 298.316799 | 24204359850  |
| 62 | 301.075790 | 27736454400  |
| 63 | 301.636002 | 22592615039  |
| 64 | 302.960067 | 24547587163  |
| 65 | 306.657405 | 21599639833  |
| 66 | 310.346212 | 25320558503  |
| 67 | 310.351750 | 37782926200  |
| 68 | 310.978278 | 23159863652  |
| 69 | 312.243571 | 604090848310 |
| 70 | 312.246810 | 105824340987 |
| 71 | 312.284992 | 23990846155  |
| 72 | 314.425771 | 22101649226  |
| 73 | 315.451566 | 21689028522  |
| 74 | 315.655705 | 22204739611  |
| 75 | 316.030027 | 27106990087  |
| 76 | 319.119428 | 23603906073  |
| 77 | 324.140575 | 23102592175  |
| 78 | 325.714436 | 22315369039  |
| 79 | 326.692202 | 23086361745  |
| 80 | 327.081756 | 22254273679  |
| 81 | 329.408815 | 22986106370  |
| 82 | 335.115515 | 25308912951  |
| 83 | 336.123220 | 104918094550 |
| 84 | 337.126698 | 32394830055  |

---

# Mass Spectrum List Report

---

| #   | m/z        | I             |
|-----|------------|---------------|
| 85  | 340.094872 | 40299924984   |
| 86  | 348.140941 | 28158310184   |
| 87  | 348.158885 | 28665821009   |
| 88  | 348.196337 | 1280206863537 |
| 89  | 349.167060 | 34135761138   |
| 90  | 349.199795 | 204799796071  |
| 91  | 349.787053 | 24126654053   |
| 92  | 353.302479 | 23421961555   |
| 93  | 354.410104 | 23389411658   |
| 94  | 355.609154 | 23756613107   |
| 95  | 360.308409 | 39290004976   |
| 96  | 360.324246 | 695183548105  |
| 97  | 361.327702 | 72310817766   |
| 98  | 365.757389 | 24129624146   |
| 99  | 368.339580 | 24116222875   |
| 100 | 380.186506 | 43990371185   |
| 101 | 388.624743 | 25383906756   |
| 102 | 389.123325 | 23750988912   |
| 103 | 389.175525 | 24335225365   |
| 104 | 389.450636 | 26143075525   |
| 105 | 389.510689 | 24431962399   |
| 106 | 389.614572 | 24505693320   |
| 107 | 389.693714 | 23877291582   |
| 108 | 389.719403 | 24493937260   |
| 109 | 389.766261 | 34076594117   |
| 110 | 389.953387 | 24350960985   |
| 111 | 389.964482 | 26983088464   |
| 112 | 389.980227 | 30271017946   |
| 113 | 390.074972 | 27496403838   |
| 114 | 390.093437 | 30326583324   |
| 115 | 390.166977 | 27517991490   |
| 116 | 390.192978 | 30457872448   |
| 117 | 390.227152 | 25696999287   |
| 118 | 390.260066 | 26330148369   |
| 119 | 390.332423 | 26070001490   |
| 120 | 390.341625 | 27998434132   |
| 121 | 390.365911 | 29222999263   |
| 122 | 390.414801 | 28661141746   |
| 123 | 390.467593 | 31542214249   |
| 124 | 390.495602 | 29638810627   |
| 125 | 390.503779 | 27834063198   |
| 126 | 390.536777 | 30333540844   |
| 127 | 390.582816 | 31735186710   |
| 128 | 390.620943 | 27836945147   |
| 129 | 390.683745 | 27498955463   |
| 130 | 390.739929 | 27657063420   |
| 131 | 390.779021 | 29033331922   |
| 132 | 390.802549 | 33962326758   |
| 133 | 390.892152 | 33452659645   |
| 134 | 390.928416 | 31270568271   |
| 135 | 390.955129 | 34778746877   |
| 136 | 391.045094 | 35998688865   |
| 137 | 391.056476 | 34085875466   |
| 138 | 391.121807 | 37704096009   |
| 139 | 391.187922 | 42180557241   |
| 140 | 391.212296 | 45503044081   |
| 141 | 391.274272 | 42741256638   |
| 142 | 391.341002 | 45239820616   |
| 143 | 391.398055 | 49846723732   |
| 144 | 391.490865 | 50357086215   |
| 145 | 391.516290 | 55151354866   |
| 146 | 391.549694 | 56192878694   |
| 147 | 391.573479 | 56530010631   |
| 148 | 391.612318 | 62136210670   |

---

# Mass Spectrum List Report

---

| #   | m/z        | I              |
|-----|------------|----------------|
| 149 | 391.650373 | 61147471055    |
| 150 | 391.725395 | 73749673139    |
| 151 | 391.762483 | 81667028565    |
| 152 | 391.783238 | 88360483463    |
| 153 | 391.933553 | 119125196238   |
| 154 | 391.955637 | 131649752343   |
| 155 | 392.014441 | 173809506273   |
| 156 | 392.030754 | 188449542476   |
| 157 | 392.185845 | 40550536590310 |
| 158 | 392.640674 | 61100311101    |
| 159 | 392.653957 | 57222938012    |
| 160 | 392.711247 | 56737628242    |
| 161 | 392.805531 | 41995668818    |
| 162 | 392.819971 | 45374940203    |
| 163 | 392.863829 | 41025365063    |
| 164 | 392.885253 | 39788730656    |
| 165 | 392.979186 | 28172242013    |
| 166 | 393.189448 | 6962530350913  |
| 167 | 393.337124 | 66635987894    |
| 168 | 393.361533 | 60442472391    |
| 169 | 393.390349 | 52461569247    |
| 170 | 393.434780 | 43884101608    |
| 171 | 393.450382 | 43655718867    |
| 172 | 393.489526 | 46987823113    |
| 173 | 393.518076 | 39603953836    |
| 174 | 393.555594 | 42243504082    |
| 175 | 393.649036 | 45465572669    |
| 176 | 393.705857 | 39248840044    |
| 177 | 393.759669 | 33977330853    |
| 178 | 393.832569 | 35611085787    |
| 179 | 393.871996 | 29456701968    |
| 180 | 393.914735 | 33079435201    |
| 181 | 393.977215 | 30731953976    |
| 182 | 393.996729 | 28620766717    |
| 183 | 394.047273 | 30250907305    |
| 184 | 394.130143 | 37269925914    |
| 185 | 394.147132 | 35229696403    |
| 186 | 394.166209 | 48858689112    |
| 187 | 394.193173 | 504372124324   |
| 188 | 394.195732 | 309898970496   |
| 189 | 394.277175 | 29090712151    |
| 190 | 394.306229 | 26862405721    |
| 191 | 394.346698 | 24729278396    |
| 192 | 394.486948 | 26735661124    |
| 193 | 394.503785 | 27105582794    |
| 194 | 394.531694 | 27589040878    |
| 195 | 394.619289 | 28141098106    |
| 196 | 394.703840 | 23865573735    |
| 197 | 394.747408 | 28246909598    |
| 198 | 394.910040 | 25727773966    |
| 199 | 395.129013 | 24396953572    |
| 200 | 395.196447 | 49197013080    |
| 201 | 395.449350 | 24085741842    |
| 202 | 396.527324 | 23984074695    |
| 203 | 397.766987 | 24475134543    |
| 204 | 398.242213 | 231191101496   |
| 205 | 398.260152 | 27833519756    |
| 206 | 399.245576 | 48196117147    |
| 207 | 413.213004 | 52453333467    |
| 208 | 414.168104 | 1404428337196  |
| 209 | 414.290483 | 25127325348    |
| 210 | 414.484752 | 22965497957    |
| 211 | 414.520605 | 23094094979    |
| 212 | 415.061182 | 23789874739    |

---

# Mass Spectrum List Report

---

| #   | m/z        | I             |
|-----|------------|---------------|
| 213 | 415.171697 | 219965192121  |
| 214 | 426.207120 | 38549501499   |
| 215 | 427.213566 | 37914916672   |
| 216 | 432.254320 | 25942797476   |
| 217 | 435.345587 | 51455535266   |
| 218 | 436.150459 | 229290712556  |
| 219 | 437.153770 | 33131319044   |
| 220 | 448.249118 | 465084995910  |
| 221 | 449.252458 | 81365160146   |
| 222 | 458.536538 | 23893907132   |
| 223 | 462.228654 | 23412295257   |
| 224 | 464.244134 | 340468037584  |
| 225 | 465.247488 | 54297840796   |
| 226 | 466.259747 | 27460730228   |
| 227 | 479.619054 | 22507702347   |
| 228 | 480.551333 | 96997958963   |
| 229 | 481.554793 | 34386660622   |
| 230 | 484.272464 | 23126506878   |
| 231 | 486.226216 | 47606875684   |
| 232 | 486.781177 | 23468454072   |
| 233 | 494.567511 | 23236872212   |
| 234 | 508.467631 | 24075915820   |
| 235 | 508.582615 | 1122868734843 |
| 236 | 508.634544 | 37977371188   |
| 237 | 508.688281 | 28797327906   |
| 238 | 509.586102 | 265288949476  |
| 239 | 510.589090 | 27022089017   |
| 240 | 522.598571 | 37634179524   |
| 241 | 524.268805 | 22740178262   |
| 242 | 524.577931 | 49778965110   |
| 243 | 526.281351 | 51557490736   |
| 244 | 527.284220 | 24880665229   |
| 245 | 536.110179 | 26110597947   |
| 246 | 536.146487 | 23006255316   |
| 247 | 536.319460 | 27363450493   |
| 248 | 536.363459 | 28288514409   |
| 249 | 536.435656 | 29437159014   |
| 250 | 536.613887 | 3739964189713 |
| 251 | 536.940500 | 26790553509   |
| 252 | 537.056273 | 30194627241   |
| 253 | 537.149356 | 23135508766   |
| 254 | 537.187007 | 25182810331   |
| 255 | 537.207903 | 22944338695   |
| 256 | 537.283508 | 24050761066   |
| 257 | 537.394897 | 30403951273   |
| 258 | 537.538252 | 37582591842   |
| 259 | 537.617380 | 1224857049576 |
| 260 | 538.620951 | 129496427564  |
| 261 | 550.593683 | 29510807825   |
| 262 | 550.629844 | 34378167409   |
| 263 | 552.609163 | 184101105512  |
| 264 | 553.612564 | 48082155221   |
| 265 | 564.510709 | 23848065791   |
| 266 | 564.645466 | 882641354822  |
| 267 | 564.944924 | 23247658245   |
| 268 | 565.648918 | 297413405798  |
| 269 | 566.652319 | 23075602541   |
| 270 | 567.279381 | 26463973670   |
| 271 | 576.407043 | 24073910621   |
| 272 | 578.625762 | 25618634077   |
| 273 | 580.640202 | 33837149770   |
| 274 | 592.581679 | 23272295935   |
| 275 | 592.676878 | 1005205620909 |
| 276 | 592.810473 | 31725415608   |

---

## Mass Spectrum List Report

---

| #   | m/z        | I            |
|-----|------------|--------------|
| 277 | 592.838480 | 23554787743  |
| 278 | 593.316040 | 23524095576  |
| 279 | 593.506947 | 28068177276  |
| 280 | 593.680314 | 368338063515 |
| 281 | 594.683837 | 28662211176  |
| 282 | 608.671591 | 24180442952  |
| 283 | 609.252615 | 23873716104  |
| 284 | 611.269123 | 27840496519  |
| 285 | 612.255711 | 41415070760  |
| 286 | 617.681617 | 22541133470  |
| 287 | 620.708374 | 30479424322  |
| 288 | 621.711888 | 22341171184  |
| 289 | 626.266241 | 24434758284  |
| 290 | 643.312676 | 26766732558  |
| 291 | 656.302496 | 77988334334  |
| 292 | 657.305766 | 33120870943  |
| 293 | 671.886873 | 25355796336  |
| 294 | 672.230615 | 23140651961  |
| 295 | 673.317621 | 22433506952  |
| 296 | 678.283906 | 27135892983  |
| 297 | 685.437541 | 58109582952  |
| 298 | 733.900302 | 25665469129  |
| 299 | 753.552242 | 24035949232  |
| 300 | 781.959889 | 22896996003  |
| 301 | 830.520487 | 26933614684  |
| 302 | 891.500806 | 25631919074  |

NGJ-8-088 (CD3OD, 400 MHz) Yellow Solid - saponification of 4-acetamidoquinoline; DCM extract:

```

NAME      NGJ-8-088
EXPNO     40
PROCNO    1
Date_     20171020
Time      17.27 h
INSTRUM   spect
PROBHD    Z108618_0161 (
PULPROG   zg30
TD         65536
SOLVENT   MeOD
NS         16
DS         2
SWH        8012.820 Hz
FIDRES     0.244532 Hz
AQ         4.0894966 sec
RG          203
DW         62.400 usec
DE         6.50 usec
TE         297.7 K
D1         1.00000000 sec
TD0        1
SF01      400.1724710 MHz
NUC1       1H
P1         9.88 usec
SI         65536
SF         400.1700090 MHz
WDW        EM
SSB        0
LB         0.30 Hz
GB         0
PC         1.00
    
```

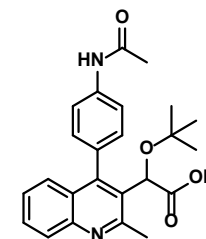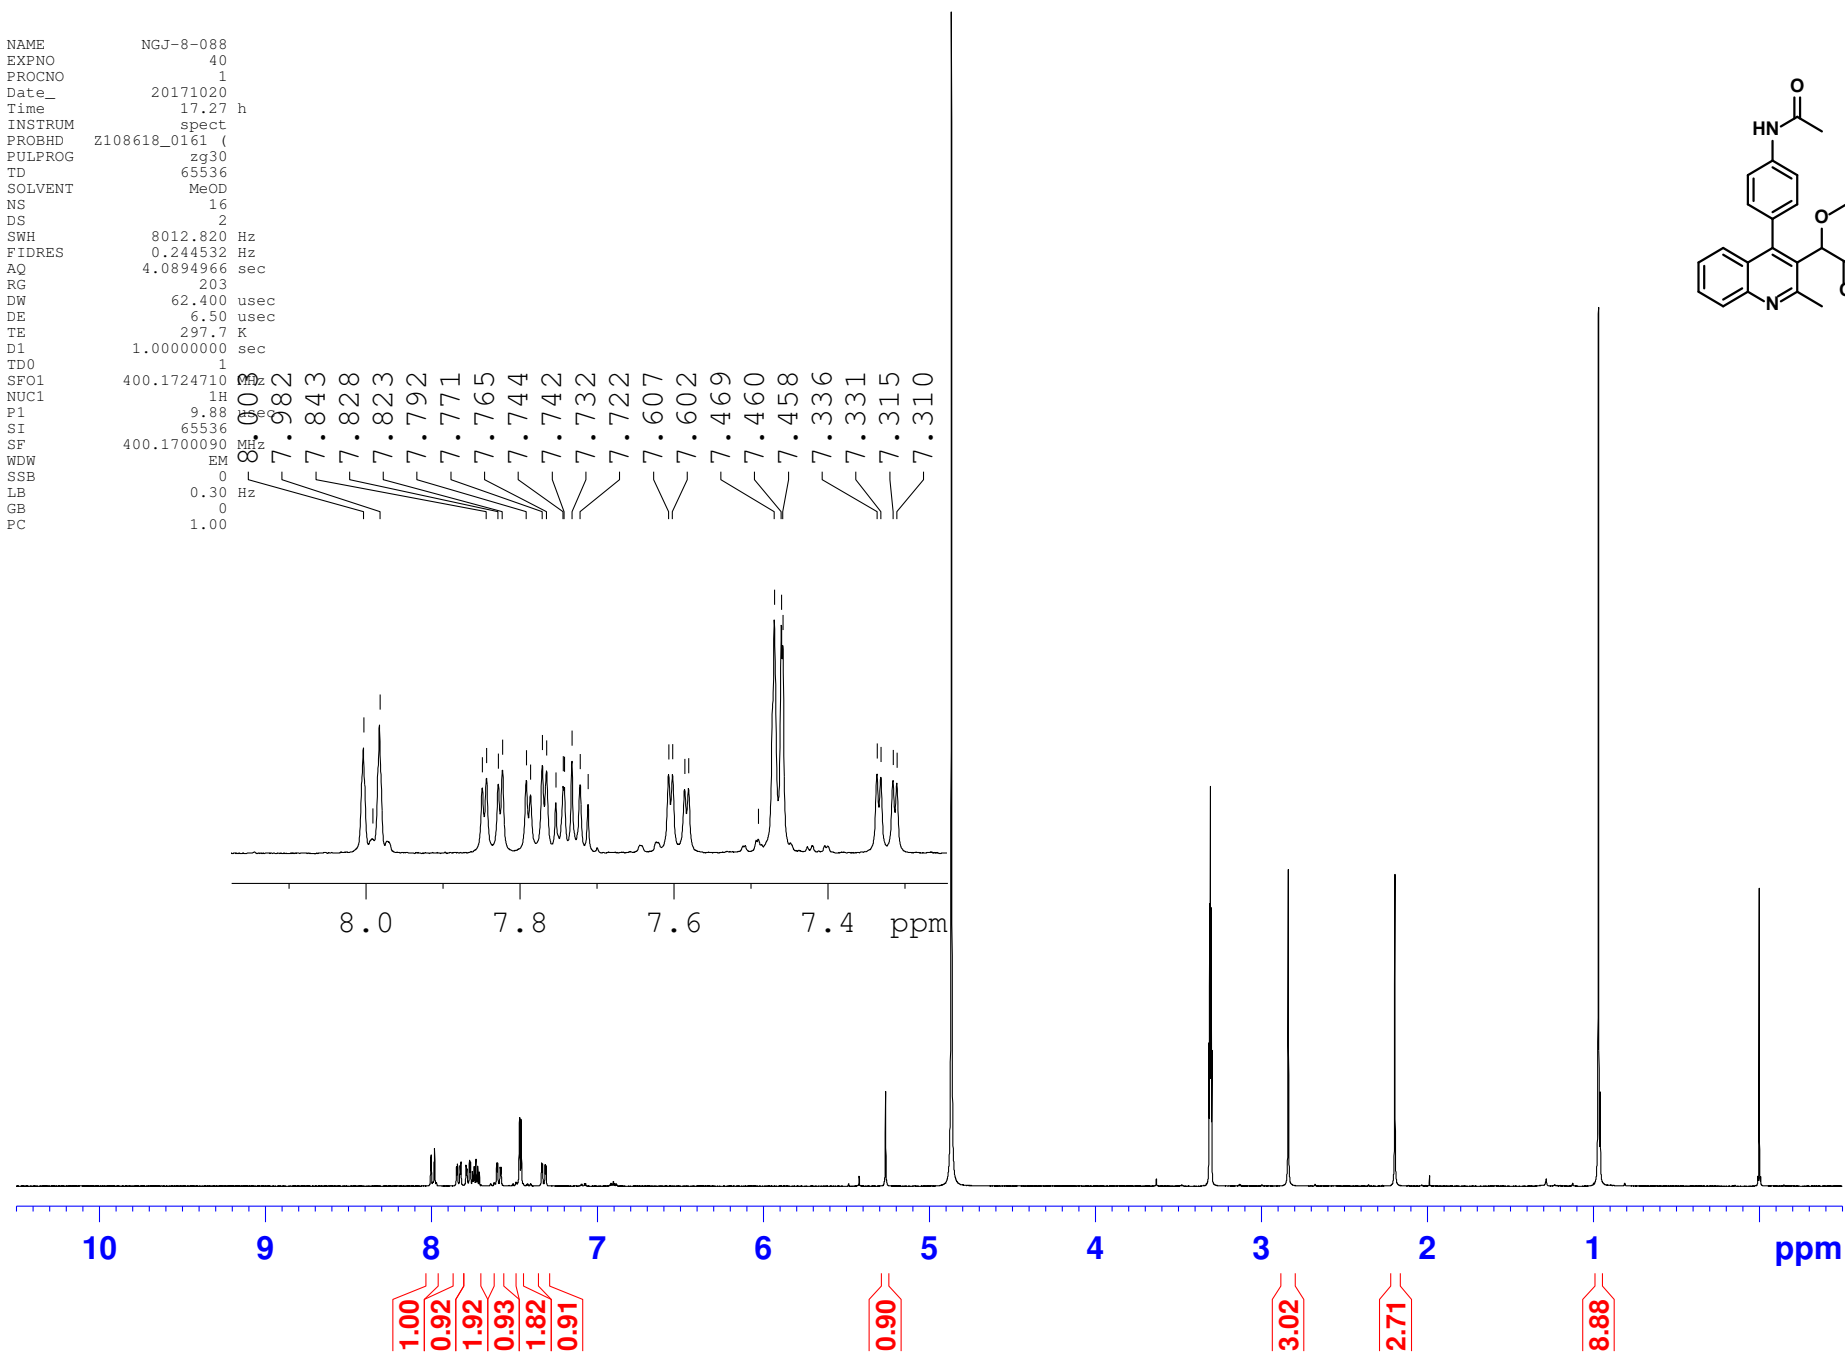

NGJ-8-088 (CD3OD, 400 MHz) Yellow Solid - saponification of 4-

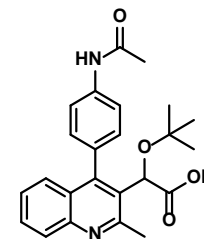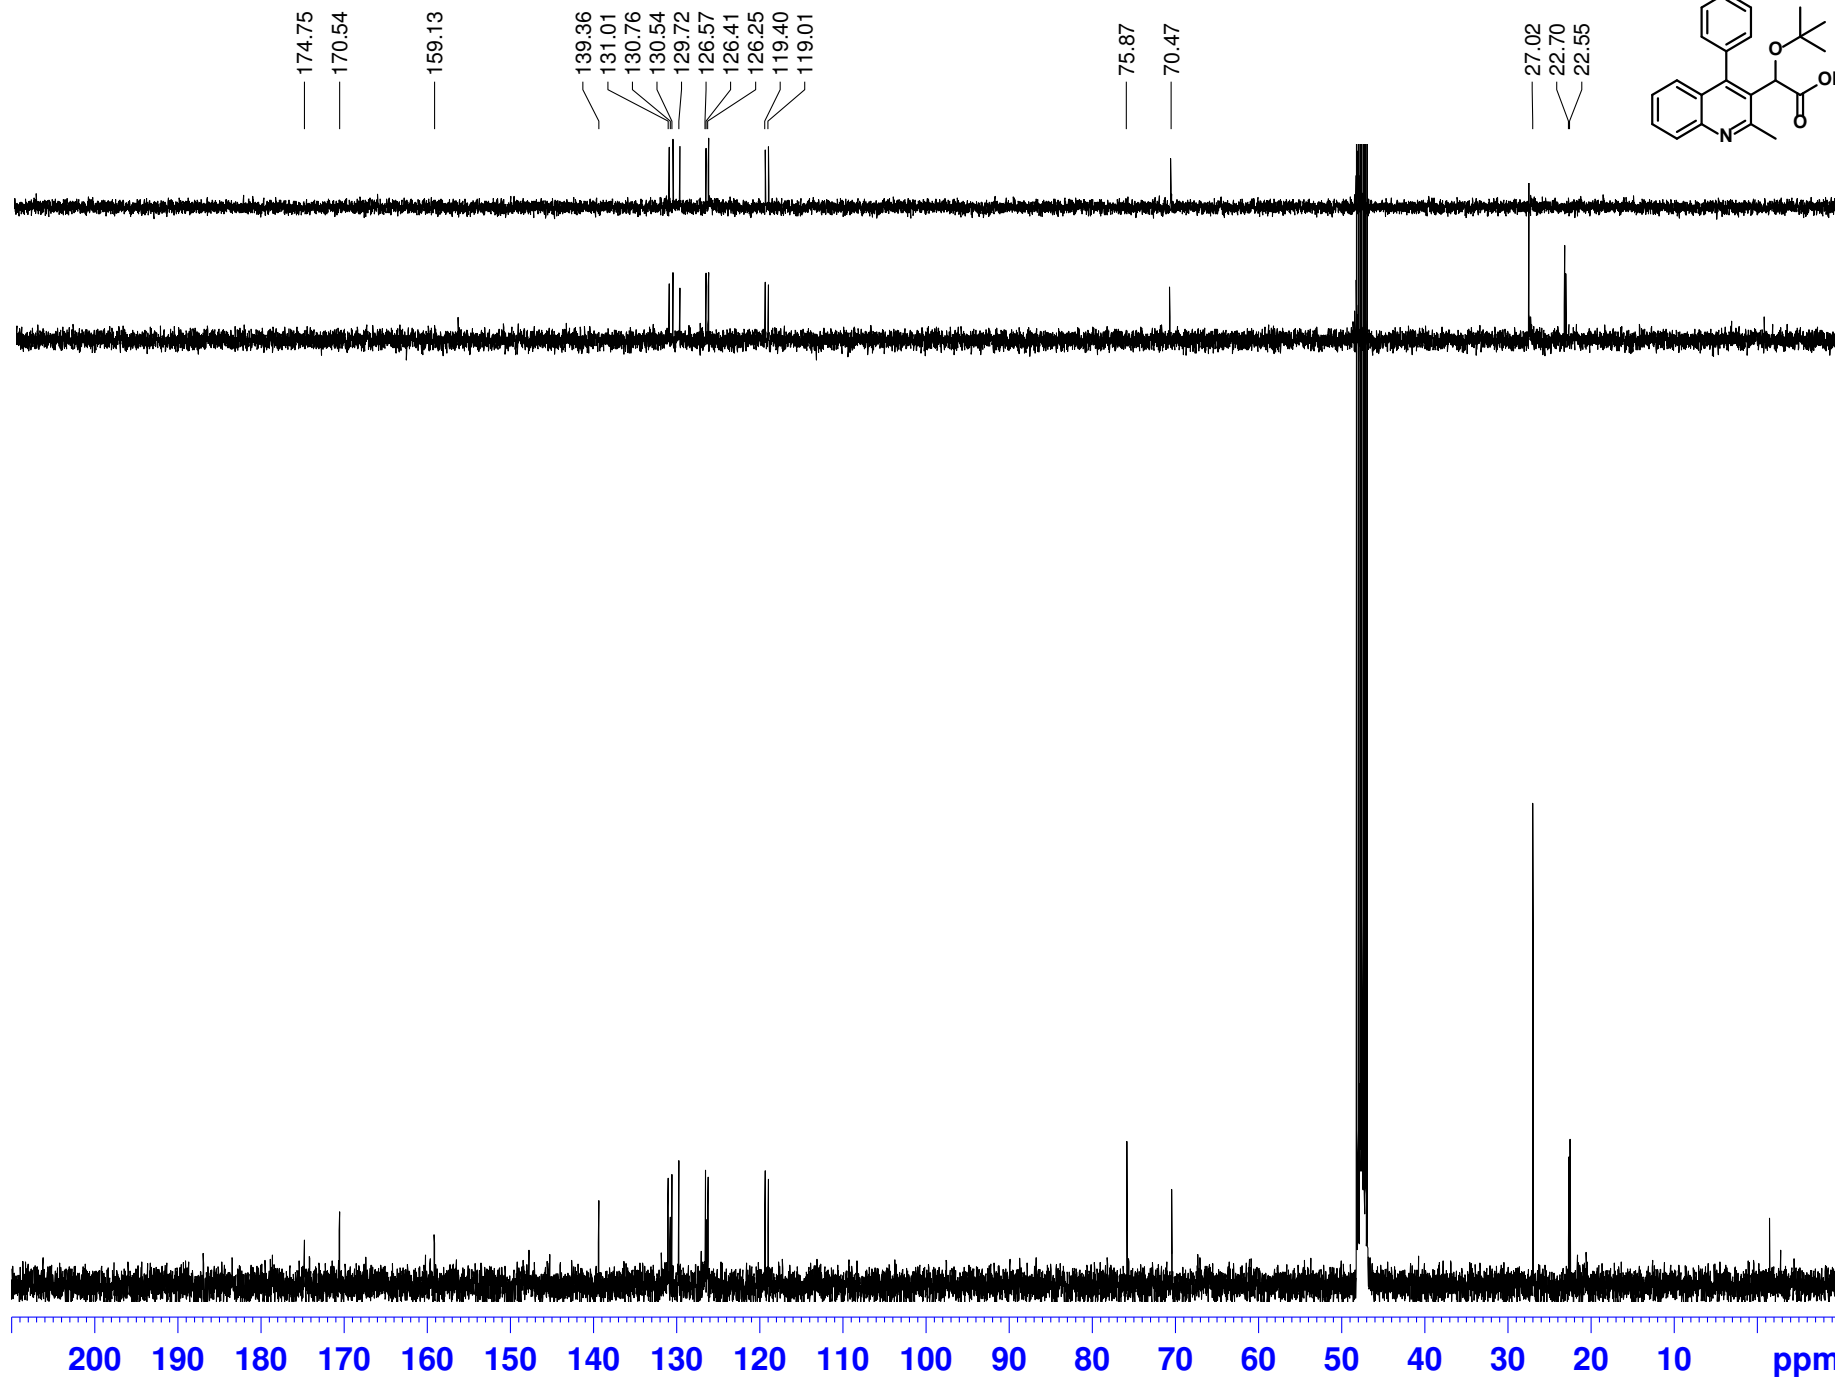



# Mass Spectrum List Report

## Analysis Info

Analysis Name F:\MS1-091514 - 080917\Data\apexdata031918\NGJ-8-088\_pos\_000003.d  
Method  
Sample Name NGJ-8-088  
Comment NGJ-8-088 in THF:MeOH C24H26N2O4 H+

Acquisition Date 3/19/2018 12:01:38 PM  
Operator FTMS\_USER  
Instrument apex-Qe

Sample Name NGJ-8-088 in THF:MeOH  
Exact Mass of C24H26N2O4 H+ = 407.196534 m/z  
Mass Observed = 407.196903 m/z  
Difference < 1.0 ppm

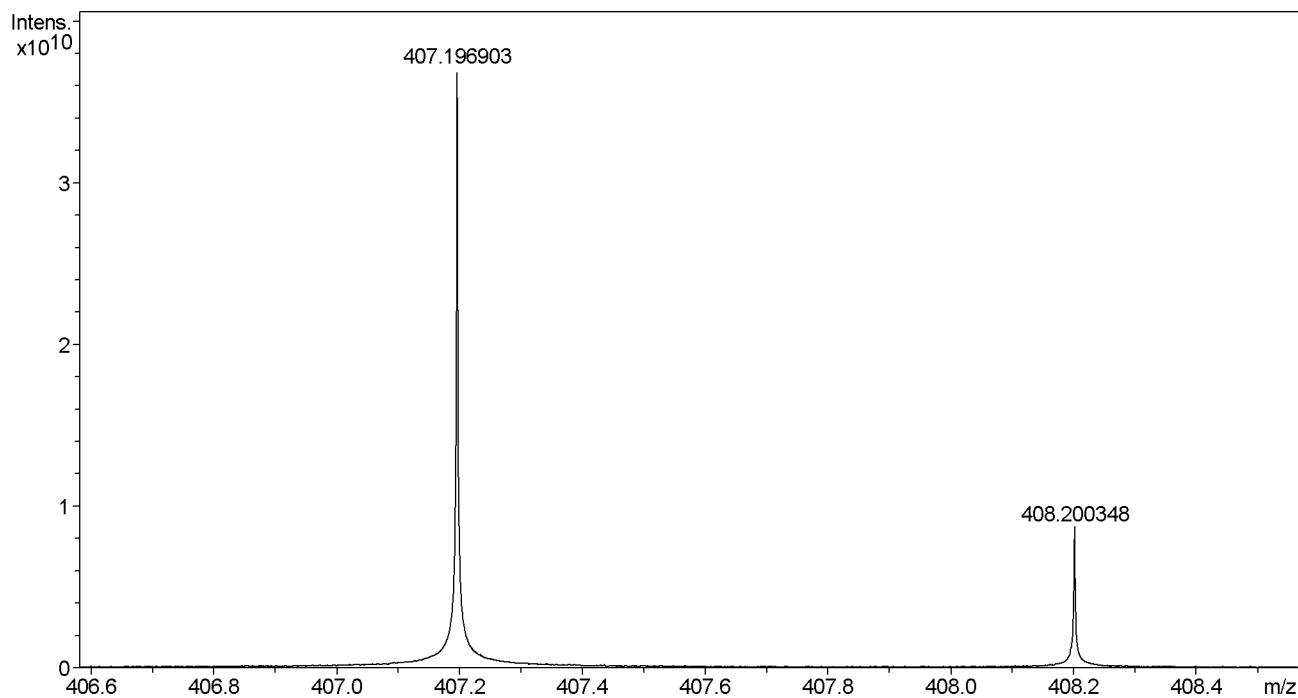

| #  | m/z        | I          |
|----|------------|------------|
| 1  | 184.390826 | 305956616  |
| 2  | 189.312273 | 87482022   |
| 3  | 189.685646 | 766626834  |
| 4  | 190.061840 | 2074646750 |
| 5  | 199.094324 | 103824190  |
| 6  | 201.412837 | 179250526  |
| 7  | 201.885166 | 595341362  |
| 8  | 202.340474 | 220921121  |
| 9  | 203.601732 | 179599226  |
| 10 | 209.442000 | 311252522  |
| 11 | 215.089220 | 565125534  |
| 12 | 231.120584 | 229877215  |
| 13 | 233.071339 | 113891595  |
| 14 | 245.099849 | 217840813  |
| 15 | 251.573420 | 250108448  |
| 16 | 252.580927 | 1089144571 |
| 17 | 257.846464 | 123996933  |
| 18 | 258.935120 | 590323337  |
| 19 | 268.312306 | 102970778  |
| 20 | 285.131196 | 109887946  |

---

# Mass Spectrum List Report

---

| #  | m/z        | I           |
|----|------------|-------------|
| 21 | 285.491572 | 216483917   |
| 22 | 286.975378 | 1119066599  |
| 23 | 298.347215 | 153823684   |
| 24 | 301.075649 | 119082723   |
| 25 | 301.126174 | 123610850   |
| 26 | 301.162629 | 121710305   |
| 27 | 301.299864 | 232877784   |
| 28 | 303.141819 | 247346105   |
| 29 | 311.115863 | 117987480   |
| 30 | 314.059987 | 218507549   |
| 31 | 314.342149 | 297241330   |
| 32 | 317.121110 | 219407881   |
| 33 | 321.196527 | 216650976   |
| 34 | 326.378575 | 94617917    |
| 35 | 334.308432 | 129441181   |
| 36 | 340.394197 | 265590490   |
| 37 | 341.397610 | 91354827    |
| 38 | 342.373565 | 119155461   |
| 39 | 351.251076 | 89637932    |
| 40 | 354.373403 | 194541994   |
| 41 | 354.409875 | 649219054   |
| 42 | 355.413202 | 203632237   |
| 43 | 356.389167 | 102510301   |
| 44 | 363.207121 | 3529637090  |
| 45 | 364.210559 | 727060549   |
| 46 | 365.186435 | 2271816147  |
| 47 | 365.222663 | 131608505   |
| 48 | 366.189815 | 463655546   |
| 49 | 368.166205 | 175247304   |
| 50 | 368.425608 | 115606289   |
| 51 | 370.404844 | 853759227   |
| 52 | 371.408205 | 209546033   |
| 53 | 375.199467 | 194250345   |
| 54 | 379.202198 | 143499059   |
| 55 | 384.420407 | 100966145   |
| 56 | 390.371105 | 132055043   |
| 57 | 391.238456 | 7855299527  |
| 58 | 392.241935 | 1703210858  |
| 59 | 393.210165 | 100515138   |
| 60 | 393.245281 | 169976688   |
| 61 | 393.298075 | 760207542   |
| 62 | 394.301455 | 169700505   |
| 63 | 396.456968 | 129223642   |
| 64 | 398.241895 | 7986302506  |
| 65 | 399.245339 | 1483167230  |
| 66 | 400.248766 | 195119415   |
| 67 | 405.217792 | 192784591   |
| 68 | 406.221185 | 116613349   |
| 69 | 407.196903 | 37023520276 |
| 70 | 407.436346 | 211080294   |
| 71 | 408.200348 | 8737741316  |
| 72 | 409.200833 | 198611397   |
| 73 | 409.203909 | 664294066   |
| 74 | 409.212680 | 254981464   |
| 75 | 410.436256 | 421528091   |
| 76 | 411.439558 | 127319786   |
| 77 | 412.451833 | 205533238   |
| 78 | 413.212521 | 1017410551  |
| 79 | 413.266822 | 252535200   |
| 80 | 414.215915 | 176527599   |
| 81 | 423.192104 | 263619002   |
| 82 | 423.228468 | 294446111   |
| 83 | 423.264839 | 940402293   |
| 84 | 424.268209 | 205077368   |

---

# Mass Spectrum List Report

---

| #   | m/z        | I           |
|-----|------------|-------------|
| 85  | 424.488299 | 204399617   |
| 86  | 425.288010 | 481278332   |
| 87  | 426.291364 | 136007372   |
| 88  | 426.467573 | 219962674   |
| 89  | 429.178921 | 19246301500 |
| 90  | 430.182403 | 4651410119  |
| 91  | 431.185737 | 381856478   |
| 92  | 435.228203 | 34184600905 |
| 93  | 435.344827 | 763659129   |
| 94  | 435.355074 | 208709962   |
| 95  | 435.715221 | 105415644   |
| 96  | 436.231667 | 9253336794  |
| 97  | 436.349289 | 134861459   |
| 98  | 437.235151 | 833076665   |
| 99  | 441.298255 | 113653625   |
| 100 | 443.223270 | 147701140   |
| 101 | 451.161095 | 1930114966  |
| 102 | 452.164448 | 424030854   |
| 103 | 452.519678 | 735717543   |
| 104 | 453.523011 | 252085146   |
| 105 | 457.210408 | 4810875093  |
| 106 | 458.213867 | 975678322   |
| 107 | 459.217344 | 126368941   |
| 108 | 463.499196 | 109810916   |
| 109 | 465.239161 | 134831922   |
| 110 | 466.535242 | 220093928   |
| 111 | 467.254723 | 2226666583  |
| 112 | 468.258121 | 493829394   |
| 113 | 468.514697 | 308567727   |
| 114 | 469.517816 | 108295826   |
| 115 | 477.180890 | 229007941   |
| 116 | 479.192392 | 235654474   |
| 117 | 480.091722 | 102443829   |
| 118 | 480.550978 | 2417959996  |
| 119 | 481.262789 | 136575088   |
| 120 | 481.554346 | 780104339   |
| 121 | 482.557884 | 126616133   |
| 122 | 489.236745 | 285687472   |
| 123 | 493.175812 | 1212687705  |
| 124 | 493.226081 | 272849788   |
| 125 | 494.179147 | 292120819   |
| 126 | 494.566705 | 596450610   |
| 127 | 495.300616 | 177814240   |
| 128 | 495.570056 | 251715032   |
| 129 | 496.545969 | 670655511   |
| 130 | 497.549453 | 224078313   |
| 131 | 506.566777 | 108911112   |
| 132 | 507.322546 | 143499604   |
| 133 | 508.582178 | 18608936772 |
| 134 | 509.119622 | 272918891   |
| 135 | 509.585621 | 6327652089  |
| 136 | 510.562057 | 237696756   |
| 137 | 510.589086 | 950159352   |
| 138 | 520.582320 | 133933210   |
| 139 | 522.561380 | 308212585   |
| 140 | 522.598028 | 1205716723  |
| 141 | 523.324937 | 166831312   |
| 142 | 523.564929 | 121282851   |
| 143 | 523.601392 | 376263619   |
| 144 | 524.577242 | 3342909794  |
| 145 | 525.580651 | 1017752201  |
| 146 | 526.583959 | 150822734   |
| 147 | 528.338117 | 146132630   |
| 148 | 534.597888 | 507702866   |

---

# Mass Spectrum List Report

---

| #   | m/z        | I           |
|-----|------------|-------------|
| 149 | 535.570083 | 125112344   |
| 150 | 535.602312 | 173298392   |
| 151 | 536.613393 | 65247860509 |
| 152 | 537.395404 | 271390404   |
| 153 | 537.616811 | 24354486009 |
| 154 | 538.593365 | 308228162   |
| 155 | 538.620444 | 3490738977  |
| 156 | 539.623925 | 319818700   |
| 157 | 540.572634 | 126455804   |
| 158 | 550.593245 | 748102704   |
| 159 | 550.629462 | 748231504   |
| 160 | 551.312399 | 138866052   |
| 161 | 551.596640 | 300638750   |
| 162 | 551.632772 | 311875680   |
| 163 | 552.608473 | 10064135906 |
| 164 | 553.612048 | 3359201305  |
| 165 | 554.615415 | 495129768   |
| 166 | 562.629596 | 157579605   |
| 167 | 563.263253 | 113226931   |
| 168 | 564.644777 | 21307840172 |
| 169 | 565.648301 | 7728918366  |
| 170 | 566.588149 | 213188407   |
| 171 | 566.651745 | 1072889690  |
| 172 | 567.654961 | 139061151   |
| 173 | 568.603728 | 185435294   |
| 174 | 569.403316 | 184879371   |
| 175 | 578.624252 | 387484303   |
| 176 | 578.660728 | 484145021   |
| 177 | 579.627703 | 172514880   |
| 178 | 579.664276 | 200780612   |
| 179 | 580.639948 | 2847634066  |
| 180 | 581.643368 | 958787857   |
| 181 | 582.646736 | 154506694   |
| 182 | 590.660825 | 404703124   |
| 183 | 591.664175 | 212677643   |
| 184 | 592.428130 | 305609721   |
| 185 | 592.676171 | 25856175504 |
| 186 | 593.679616 | 10826316652 |
| 187 | 594.618665 | 131690449   |
| 188 | 594.683105 | 1664555447  |
| 189 | 595.686671 | 186828743   |
| 190 | 599.549384 | 842711498   |
| 191 | 600.552529 | 286922879   |
| 192 | 606.655775 | 647661997   |
| 193 | 606.692287 | 213967619   |
| 194 | 607.659083 | 294443851   |
| 195 | 607.695242 | 99530035    |
| 196 | 608.671366 | 3502880484  |
| 197 | 609.674671 | 1309351698  |
| 198 | 610.678080 | 212013537   |
| 199 | 613.429694 | 271188692   |
| 200 | 614.536314 | 165982311   |
| 201 | 620.707816 | 1216285880  |
| 202 | 621.711095 | 498900415   |
| 203 | 622.650703 | 121886619   |
| 204 | 622.714435 | 117208380   |
| 205 | 626.279053 | 111358956   |
| 206 | 627.266371 | 622085222   |
| 207 | 628.269871 | 248912145   |
| 208 | 636.702903 | 175561161   |
| 209 | 648.739273 | 601055151   |
| 210 | 649.742529 | 295362680   |
| 211 | 651.667827 | 125205510   |
| 212 | 655.297714 | 118853562   |

---

## Mass Spectrum List Report

---

| #   | m/z        | I          |
|-----|------------|------------|
| 213 | 657.456088 | 283321232  |
| 214 | 658.459418 | 103777231  |
| 215 | 659.292723 | 126997889  |
| 216 | 664.734127 | 107114361  |
| 217 | 677.508086 | 94535730   |
| 218 | 685.436695 | 1726766683 |
| 219 | 686.440203 | 731199834  |
| 220 | 687.401143 | 114808342  |
| 221 | 687.443831 | 190960773  |
| 222 | 701.482130 | 147038993  |
| 223 | 814.700464 | 96684154   |
| 224 | 857.351074 | 149112909  |
| 225 | 861.541638 | 320329090  |
| 226 | 862.545623 | 187913263  |
| 227 | 877.537357 | 665343511  |
| 228 | 878.540953 | 384932460  |

NGJ-9-024 (CDC13, 400 MHz) Pure Yellow Oil - saponification of 3-chlorophenylquinoline

NAME NGJ-9-024  
 EXPNO 30  
 PROCNO 1  
 Date\_ 20171222  
 Time\_ 13.04 h  
 INSTRUM spect  
 PROBHD Z108618\_0161 ( )  
 PULPROG zg30  
 TD 65536  
 SOLVENT CDC13  
 NS 16  
 DS 2  
 SWH 8012.820 Hz  
 FIDRES 0.244532 Hz  
 AQ 4.0894966 sec  
 RG 128  
 DW 62.400 usec  
 DE 6.50 usec  
 TE 298.3 K  
 D1 1.00000000 sec  
 TD0 1  
 SF01 400.1724710 MHz  
 NUC1 1H  
 P1 9.88 usec  
 SI 65536  
 SF 400.1700086 MHz  
 WDW EM  
 SSB 0  
 LB 0.30 Hz  
 GB 0  
 PC 1.00

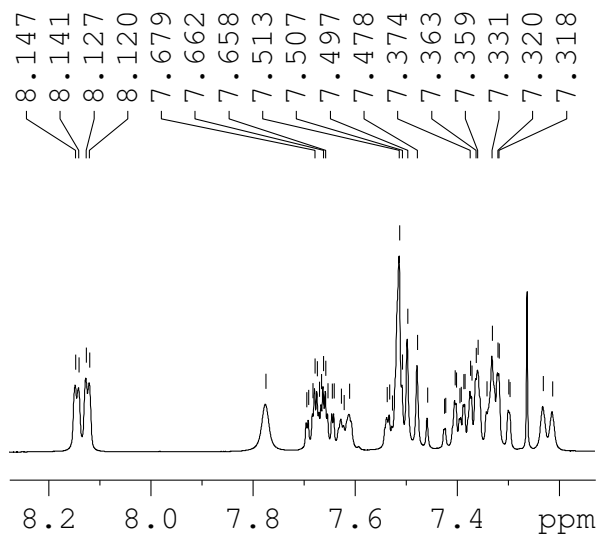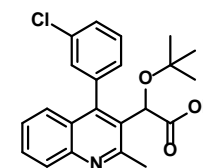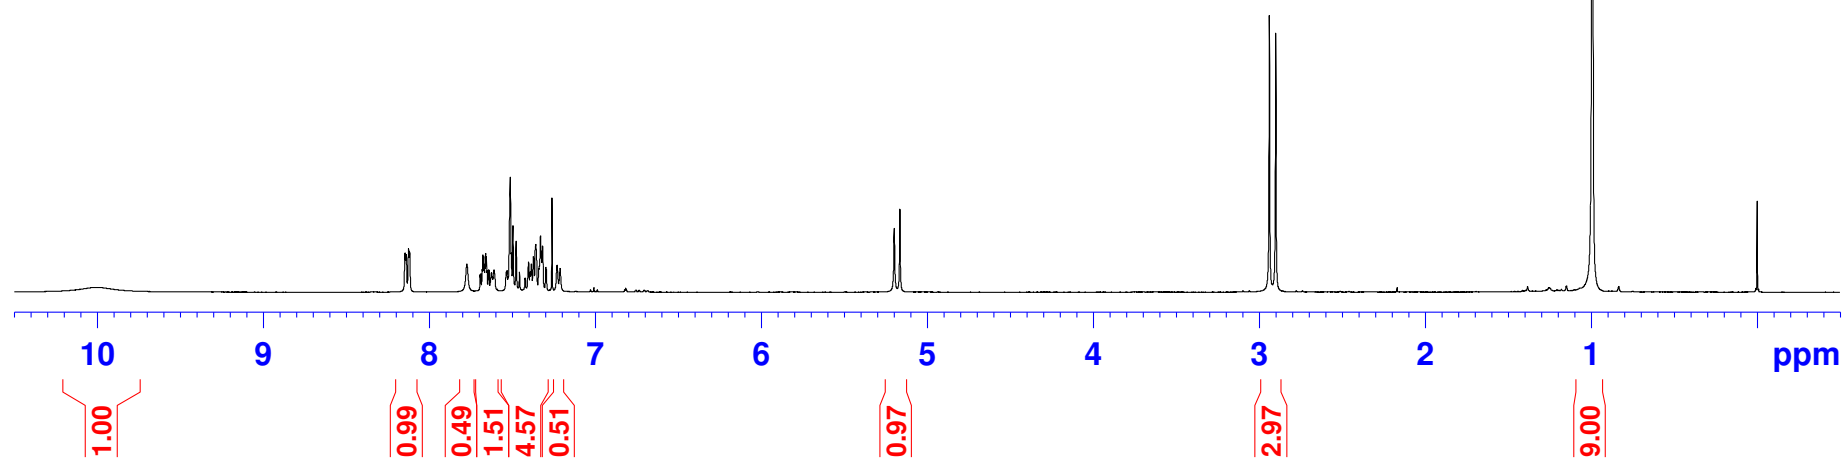

NGJ-9-024 (CDCl<sub>3</sub>, 400 MHz) Pure Yellow Oil - saponification of 3-chlorophenylquinoline

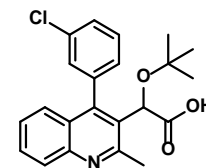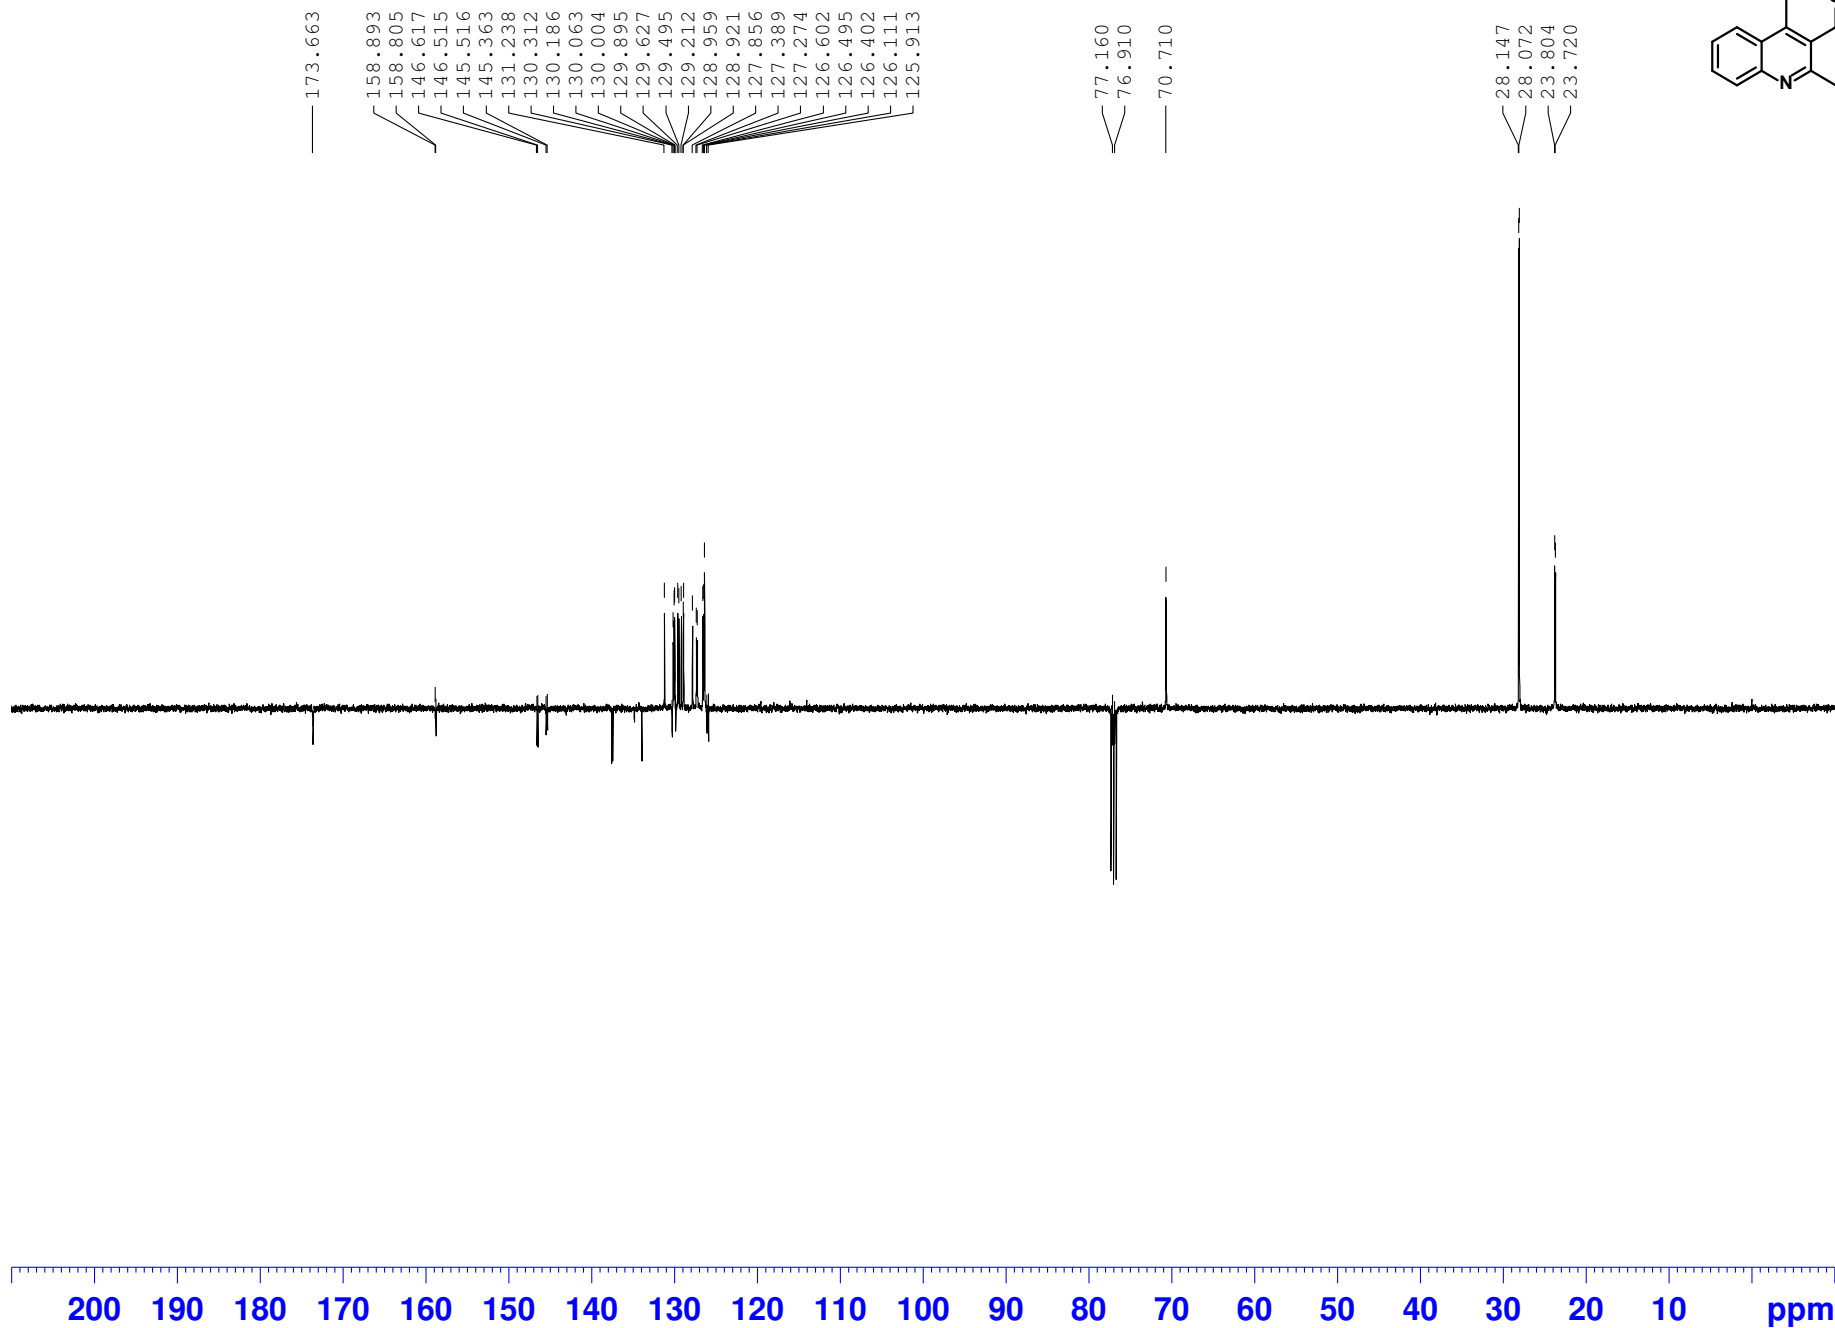

# Mass Spectrum List Report

## Analysis Info

Analysis Name F:\MS1-091514 - 080917\Data\apexdata031918\NGJ-9-024\_pos\_000001.d  
Method  
Sample Name NGJ-9-024  
Comment NGJ-9-024 in THF:MeOH C22H22ClNO3 H+

Acquisition Date 3/19/2018 3:27:38 PM  
Operator FTMS\_USER  
Instrument apex-Qe

Sample Name NGJ-9-024 in THF:MeOH  
Exact Mass of C22H22ClNO3 H+ = 384.136098 m/z  
Mass Observed = 384.136358 m/z

Difference < 1.0 ppm

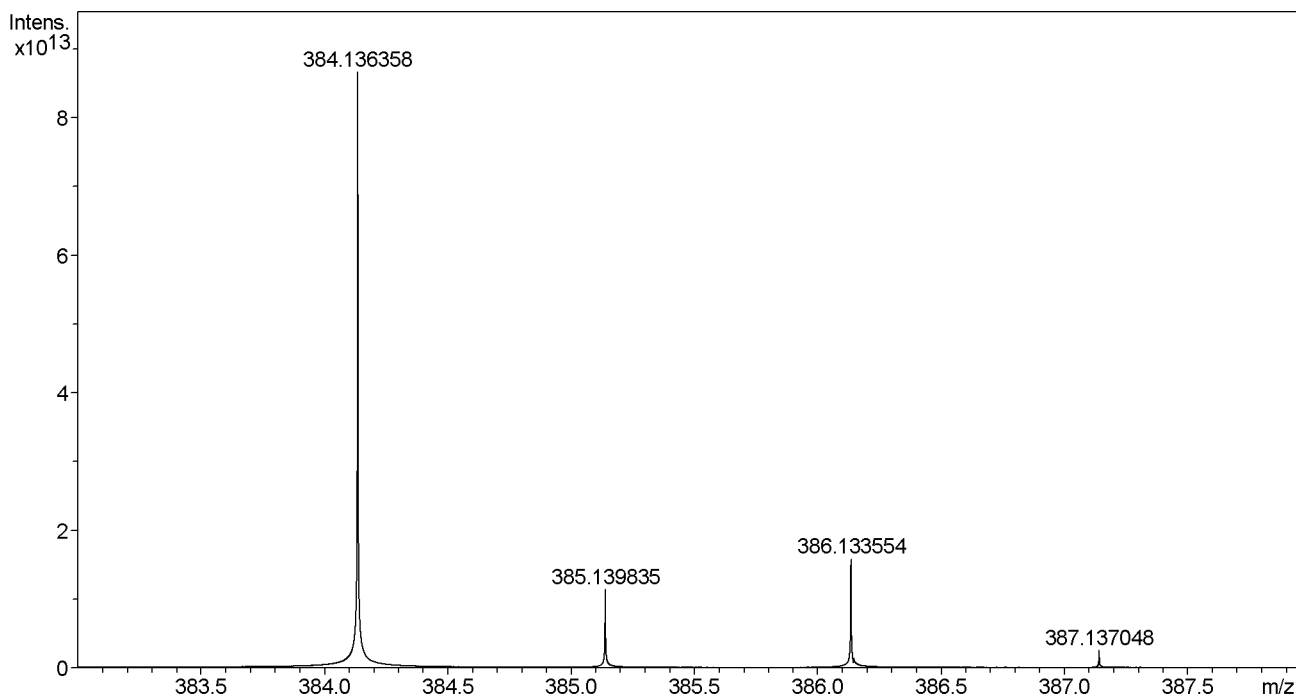

| #  | m/z        | I            |
|----|------------|--------------|
| 1  | 184.483553 | 24187905130  |
| 2  | 184.778135 | 22452626872  |
| 3  | 184.800287 | 23369493170  |
| 4  | 187.592456 | 23595124005  |
| 5  | 189.069833 | 22937675382  |
| 6  | 190.136791 | 21274825917  |
| 7  | 191.208246 | 21837192208  |
| 8  | 192.038736 | 22001977353  |
| 9  | 192.058483 | 26909852318  |
| 10 | 192.065090 | 28539603100  |
| 11 | 192.071087 | 715939544375 |
| 12 | 192.125164 | 22733230309  |
| 13 | 192.572834 | 93560618879  |
| 14 | 193.066949 | 27332398277  |
| 15 | 193.069710 | 89975538119  |
| 16 | 193.571448 | 41982626203  |
| 17 | 196.545325 | 22036765480  |
| 18 | 197.463070 | 22170216774  |
| 19 | 198.392450 | 25052346280  |
| 20 | 198.516274 | 22642828364  |



---

# Mass Spectrum List Report

---

| #  | m/z        | I            |
|----|------------|--------------|
| 21 | 201.121307 | 23158512320  |
| 22 | 202.340551 | 122452898326 |
| 23 | 203.073104 | 43088210996  |
| 24 | 204.428826 | 21483797819  |
| 25 | 205.188064 | 24018509549  |
| 26 | 209.442020 | 93363947770  |
| 27 | 209.761852 | 29347239835  |
| 28 | 210.060692 | 23694671759  |
| 29 | 210.355983 | 25317709209  |
| 30 | 210.656328 | 22071636418  |
| 31 | 210.763696 | 22042249835  |
| 32 | 211.432105 | 27638799965  |
| 33 | 212.196074 | 24325195269  |
| 34 | 213.749027 | 22474268378  |
| 35 | 217.088639 | 46141440675  |
| 36 | 218.096563 | 37476259863  |
| 37 | 221.092112 | 22042516706  |
| 38 | 224.895402 | 22704439706  |
| 39 | 225.954432 | 21497645873  |
| 40 | 229.042883 | 21843527083  |
| 41 | 229.410910 | 21290958739  |
| 42 | 229.414216 | 25019488157  |
| 43 | 231.104317 | 22070563344  |
| 44 | 233.009318 | 23491728333  |
| 45 | 233.089460 | 22579605240  |
| 46 | 238.043303 | 22272144070  |
| 47 | 238.839187 | 23290955974  |
| 48 | 239.469242 | 22137750332  |
| 49 | 241.088708 | 21973943475  |
| 50 | 243.419709 | 21700184625  |
| 51 | 246.091360 | 24972157912  |
| 52 | 247.171365 | 28513342917  |
| 53 | 248.102188 | 22722331974  |
| 54 | 248.106984 | 25474980704  |
| 55 | 251.746972 | 22214071051  |
| 56 | 258.239532 | 23107421584  |
| 57 | 264.057525 | 40610662288  |
| 58 | 265.065509 | 27261870271  |
| 59 | 265.658198 | 22857362979  |
| 60 | 266.054486 | 23782930595  |
| 61 | 266.073300 | 42440386167  |
| 62 | 268.070257 | 26440856383  |
| 63 | 268.077002 | 23520403658  |
| 64 | 270.009377 | 21396384247  |
| 65 | 270.060589 | 22775453421  |
| 66 | 270.764580 | 22134282846  |
| 67 | 270.886941 | 21531925548  |
| 68 | 274.665823 | 21575779023  |
| 69 | 279.845182 | 22710963312  |
| 70 | 282.068389 | 85304592623  |
| 71 | 282.979207 | 21543839876  |
| 72 | 283.057495 | 29998321236  |
| 73 | 283.071573 | 36052793901  |
| 74 | 284.065150 | 35008230017  |
| 75 | 286.719746 | 21902116931  |
| 76 | 286.945331 | 21589817099  |
| 77 | 289.389527 | 23749963510  |
| 78 | 293.038574 | 23087845930  |
| 79 | 293.845540 | 22965638226  |
| 80 | 294.409375 | 24420951454  |
| 81 | 295.106284 | 22169826278  |
| 82 | 296.047087 | 24852781465  |
| 83 | 297.050776 | 21829430279  |
| 84 | 300.021535 | 22440625231  |

---

# Mass Spectrum List Report

---

| #   | m/z        | I            |
|-----|------------|--------------|
| 85  | 301.075772 | 24533100191  |
| 86  | 304.191326 | 130580997127 |
| 87  | 304.261719 | 88669858383  |
| 88  | 305.058381 | 27077003446  |
| 89  | 306.898047 | 21881175783  |
| 90  | 315.923179 | 21675026439  |
| 91  | 317.022530 | 21643837099  |
| 92  | 318.241076 | 31164981962  |
| 93  | 318.499382 | 22648277191  |
| 94  | 320.256666 | 35478380104  |
| 95  | 322.282346 | 29354493407  |
| 96  | 324.387805 | 88481510080  |
| 97  | 326.511075 | 84045544820  |
| 98  | 327.066002 | 25534088325  |
| 99  | 328.074062 | 44144564943  |
| 100 | 328.694784 | 544636715530 |
| 101 | 329.076365 | 26242242913  |
| 102 | 329.252438 | 22926197144  |
| 103 | 330.070361 | 46104444709  |
| 104 | 332.045553 | 125528823026 |
| 105 | 334.042551 | 24882944603  |
| 106 | 336.251617 | 24740485200  |
| 107 | 340.146935 | 349159635710 |
| 108 | 342.144108 | 51445545154  |
| 109 | 349.340891 | 25623736896  |
| 110 | 372.136990 | 62894504374  |
| 111 | 378.191555 | 28447867820  |
| 112 | 378.427914 | 27748851214  |
| 113 | 378.548164 | 27727159076  |
| 114 | 378.999598 | 33801946233  |
| 115 | 379.289079 | 28985722176  |
| 116 | 379.591326 | 28236832420  |
| 117 | 379.662206 | 32282678059  |
| 118 | 379.744657 | 28205212111  |
| 119 | 379.949920 | 29862573636  |
| 120 | 380.010583 | 28789248317  |
| 121 | 380.075942 | 29011977040  |
| 122 | 380.094839 | 30615758524  |
| 123 | 380.200289 | 29643646008  |
| 124 | 380.247052 | 29505373940  |
| 125 | 380.272983 | 32214840659  |
| 126 | 380.353090 | 31827542861  |
| 127 | 380.402631 | 32612581965  |
| 128 | 380.427672 | 27434135716  |
| 129 | 380.478294 | 28180859785  |
| 130 | 380.569518 | 28935002179  |
| 131 | 380.675335 | 31625738713  |
| 132 | 380.737975 | 28811808143  |
| 133 | 380.781084 | 31797490307  |
| 134 | 380.830466 | 33005543940  |
| 135 | 380.876652 | 28696453164  |
| 136 | 380.887711 | 32416131074  |
| 137 | 380.902915 | 32226744772  |
| 138 | 380.932928 | 33999132350  |
| 139 | 380.980547 | 33254486455  |
| 140 | 381.016913 | 30790327933  |
| 141 | 381.083071 | 32237889560  |
| 142 | 381.149682 | 30621357617  |
| 143 | 381.164965 | 33963160335  |
| 144 | 381.240015 | 37411790477  |
| 145 | 381.283238 | 38665395653  |
| 146 | 381.341051 | 36008202553  |
| 147 | 381.387706 | 35870106493  |
| 148 | 381.481476 | 35384816957  |

---

# Mass Spectrum List Report

---

| #   | m/z        | I              |
|-----|------------|----------------|
| 149 | 381.509431 | 34542039957    |
| 150 | 381.531317 | 37812470693    |
| 151 | 381.574486 | 34483882461    |
| 152 | 381.655414 | 39280033623    |
| 153 | 381.708875 | 39921043915    |
| 154 | 381.731792 | 41735345623    |
| 155 | 381.783758 | 39137325605    |
| 156 | 381.826661 | 37959332533    |
| 157 | 381.879770 | 41674997596    |
| 158 | 381.915438 | 39252799080    |
| 159 | 381.937136 | 43158111430    |
| 160 | 382.002507 | 44462982366    |
| 161 | 382.067221 | 44056576651    |
| 162 | 382.117699 | 45918129543    |
| 163 | 382.179311 | 42498182887    |
| 164 | 382.198995 | 42747543424    |
| 165 | 382.226129 | 46178052579    |
| 166 | 382.265678 | 49263857959    |
| 167 | 382.295459 | 44278014484    |
| 168 | 382.360341 | 53716742584    |
| 169 | 382.424118 | 53224818909    |
| 170 | 382.529306 | 52878506607    |
| 171 | 382.647985 | 59571203711    |
| 172 | 382.728766 | 60452034341    |
| 173 | 382.767525 | 60055731593    |
| 174 | 382.860466 | 62089028943    |
| 175 | 382.866645 | 61336476517    |
| 176 | 382.896745 | 62713706919    |
| 177 | 382.917102 | 63077417687    |
| 178 | 382.997187 | 68443077601    |
| 179 | 383.023841 | 68039793464    |
| 180 | 383.046541 | 68242454891    |
| 181 | 383.129061 | 84937729221    |
| 182 | 383.154652 | 76913157263    |
| 183 | 383.173080 | 77019748592    |
| 184 | 383.306368 | 84442769546    |
| 185 | 383.387212 | 94259557134    |
| 186 | 383.434365 | 101518317799   |
| 187 | 383.596862 | 126609990797   |
| 188 | 383.648941 | 139536292589   |
| 189 | 383.695776 | 155830008430   |
| 190 | 383.791938 | 192620279479   |
| 191 | 384.136358 | 86518544870037 |
| 192 | 384.185575 | 1167142019340  |
| 193 | 384.611753 | 127672492685   |
| 194 | 384.689217 | 104199162752   |
| 195 | 384.781288 | 84944176161    |
| 196 | 384.809104 | 84290853699    |
| 197 | 384.846633 | 78130277882    |
| 198 | 384.888411 | 74463040976    |
| 199 | 384.956483 | 71600042441    |
| 200 | 385.139835 | 11398185211197 |
| 201 | 385.337088 | 75214292074    |
| 202 | 385.474056 | 56668146433    |
| 203 | 385.552163 | 51435712008    |
| 204 | 385.626071 | 45658971562    |
| 205 | 385.708178 | 37089497318    |
| 206 | 385.775617 | 41681318082    |
| 207 | 385.798085 | 40524287228    |
| 208 | 386.002799 | 81806172244    |
| 209 | 386.133554 | 15810953139739 |
| 210 | 386.144138 | 1423701418542  |
| 211 | 386.265299 | 132047369560   |
| 212 | 386.311962 | 104665506637   |

---

# Mass Spectrum List Report

---

| #   | m/z        | I             |
|-----|------------|---------------|
| 213 | 386.360433 | 88987369510   |
| 214 | 386.417425 | 71608179044   |
| 215 | 386.474031 | 70966495976   |
| 216 | 386.585399 | 58587022714   |
| 217 | 386.613391 | 56821241572   |
| 218 | 386.630327 | 53605523396   |
| 219 | 386.664691 | 59872592583   |
| 220 | 386.721773 | 58216607504   |
| 221 | 386.756618 | 53801523962   |
| 222 | 386.812218 | 49183890043   |
| 223 | 386.871502 | 41830338193   |
| 224 | 386.911831 | 42181555043   |
| 225 | 386.962741 | 38253025174   |
| 226 | 387.011455 | 29101630218   |
| 227 | 387.064533 | 34508191590   |
| 228 | 387.137048 | 2529794230576 |
| 229 | 387.240541 | 63279791177   |
| 230 | 387.248839 | 56212512192   |
| 231 | 387.366154 | 45713548036   |
| 232 | 387.426070 | 41352959557   |
| 233 | 387.584297 | 39688600065   |
| 234 | 387.622612 | 30085954544   |
| 235 | 387.671204 | 37163148968   |
| 236 | 387.706951 | 36970800661   |
| 237 | 387.766322 | 35007545076   |
| 238 | 387.784384 | 34246558915   |
| 239 | 387.828518 | 36652282173   |
| 240 | 387.927573 | 39458556810   |
| 241 | 387.959015 | 40116536215   |
| 242 | 387.987164 | 35285898279   |
| 243 | 388.055205 | 34645981249   |
| 244 | 388.099690 | 35288343406   |
| 245 | 388.140798 | 186479380308  |
| 246 | 388.228215 | 35697226583   |
| 247 | 388.287757 | 37529255135   |
| 248 | 388.310421 | 34464941372   |
| 249 | 388.356331 | 27240637808   |
| 250 | 388.397505 | 32357270137   |
| 251 | 388.519316 | 32867122551   |
| 252 | 388.535271 | 32688435353   |
| 253 | 388.569041 | 31554344956   |
| 254 | 388.617529 | 30502836978   |
| 255 | 388.684088 | 33285293460   |
| 256 | 388.828571 | 28978521596   |
| 257 | 388.907176 | 30659415413   |
| 258 | 388.993709 | 35667265619   |
| 259 | 389.004548 | 32768547467   |
| 260 | 389.031973 | 29480976792   |
| 261 | 389.071575 | 27340812987   |
| 262 | 389.099577 | 27908163571   |
| 263 | 389.259111 | 27110251705   |
| 264 | 389.313662 | 29848013115   |
| 265 | 389.339021 | 31293270175   |
| 266 | 389.406920 | 27451918037   |
| 267 | 389.456454 | 30212084513   |
| 268 | 389.630418 | 29952041321   |
| 269 | 389.660247 | 27046765734   |
| 270 | 389.827175 | 29297309560   |
| 271 | 390.017789 | 28713396082   |
| 272 | 390.326232 | 29102570688   |
| 273 | 390.513346 | 26835174819   |
| 274 | 390.792076 | 27030962609   |
| 275 | 391.231182 | 27813162212   |
| 276 | 391.452691 | 27166327462   |

---

# Mass Spectrum List Report

---

| #   | m/z        | I             |
|-----|------------|---------------|
| 277 | 392.231798 | 28746979122   |
| 278 | 392.895459 | 27932808062   |
| 279 | 393.865662 | 27342963004   |
| 280 | 396.652319 | 26583096093   |
| 281 | 398.152904 | 33675718645   |
| 282 | 405.210749 | 26282032315   |
| 283 | 406.118592 | 1006290938426 |
| 284 | 406.974780 | 24896762358   |
| 285 | 407.120178 | 62497633353   |
| 286 | 407.122323 | 209073704032  |
| 287 | 408.115880 | 293248173880  |
| 288 | 409.119457 | 47590104325   |
| 289 | 412.168533 | 105531296019  |
| 290 | 412.183933 | 25828849725   |
| 291 | 413.171770 | 26358154611   |
| 292 | 414.164410 | 31136104198   |
| 293 | 426.184282 | 54224934807   |
| 294 | 426.744082 | 23869509618   |
| 295 | 428.098863 | 95356586823   |
| 296 | 428.101167 | 137471482533  |
| 297 | 430.098512 | 24515644112   |
| 298 | 444.215742 | 22010664697   |
| 299 | 445.559825 | 22754929564   |
| 300 | 446.994330 | 22306294729   |
| 301 | 448.272300 | 22030609188   |
| 302 | 456.067236 | 36453747344   |
| 303 | 462.885960 | 25425163763   |
| 304 | 473.932199 | 26231840540   |
| 305 | 485.954114 | 23795872580   |
| 306 | 489.870565 | 22825087685   |
| 307 | 508.121190 | 40556130183   |
| 308 | 508.583110 | 72698670129   |
| 309 | 510.137040 | 42828791222   |
| 310 | 510.522837 | 23543229063   |
| 311 | 526.758526 | 22621993083   |
| 312 | 527.426856 | 22541459610   |
| 313 | 536.586485 | 23895101330   |
| 314 | 536.614410 | 427465426559  |
| 315 | 536.667415 | 22786202205   |
| 316 | 536.697056 | 24488459729   |
| 317 | 537.617795 | 94501274717   |
| 318 | 564.645951 | 101078201973  |
| 319 | 567.304372 | 22296984966   |
| 320 | 574.852860 | 23795096070   |
| 321 | 579.548360 | 23367030113   |
| 322 | 592.677418 | 117651539952  |
| 323 | 593.680602 | 31712345580   |
| 324 | 601.203987 | 55532239579   |
| 325 | 602.207156 | 23483176298   |
| 326 | 603.200436 | 27436947725   |
| 327 | 603.219626 | 94316165405   |
| 328 | 604.222646 | 29755953888   |
| 329 | 605.216840 | 38981923507   |
| 330 | 609.195610 | 25624823912   |
| 331 | 619.661113 | 25626502208   |
| 332 | 627.150233 | 24298787784   |
| 333 | 629.042565 | 22362078089   |
| 334 | 638.795277 | 22775448664   |
| 335 | 657.635404 | 22757322260   |
| 336 | 674.278511 | 23493933432   |
| 337 | 679.408142 | 23550999397   |
| 338 | 688.615604 | 23735227522   |
| 339 | 689.338622 | 23188931567   |
| 340 | 699.464636 | 23633253323   |

---

## Mass Spectrum List Report

---

| #   | m/z        | I           |
|-----|------------|-------------|
| 341 | 704.343274 | 23710096032 |
| 342 | 743.574270 | 26654379679 |
| 343 | 744.573247 | 23176087186 |
| 344 | 753.000571 | 24460264107 |
| 345 | 795.014616 | 24005893701 |
| 346 | 796.844733 | 23192911128 |
| 347 | 901.554003 | 24888640558 |
| 348 | 923.823362 | 28157867087 |
| 349 | 944.019327 | 26604371520 |
| 350 | 958.655109 | 23753207748 |
| 351 | 998.024295 | 23697428003 |

# AH-3-52B Characterization

NAME AH-3-52  
EXPNO 80  
PROCNO 1  
Date\_ 20171129  
Time 21.45 h  
INSTRUM spect  
PROBHD z108618\_0161 (  
PULPROG zg30  
TD 65536  
SOLVENT CDC13  
NS 16  
DS 2  
SWH 8012.820 Hz  
FIDRES 0.244532 Hz  
AQ 4.0894966 sec  
RG 203  
DW 62.400 usec  
DE 6.50 usec  
TE 298.2 K  
D1 1.00000000 sec  
TDO 1  
SFO1 400.1724710 MHz  
NUC1 1H  
P1 9.88 usec  
SI 65536  
SF 400.1700086 MHz  
WDW EM  
SSB 0  
LB 0.30 Hz  
GB 0  
PC 1.00

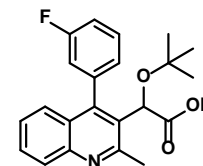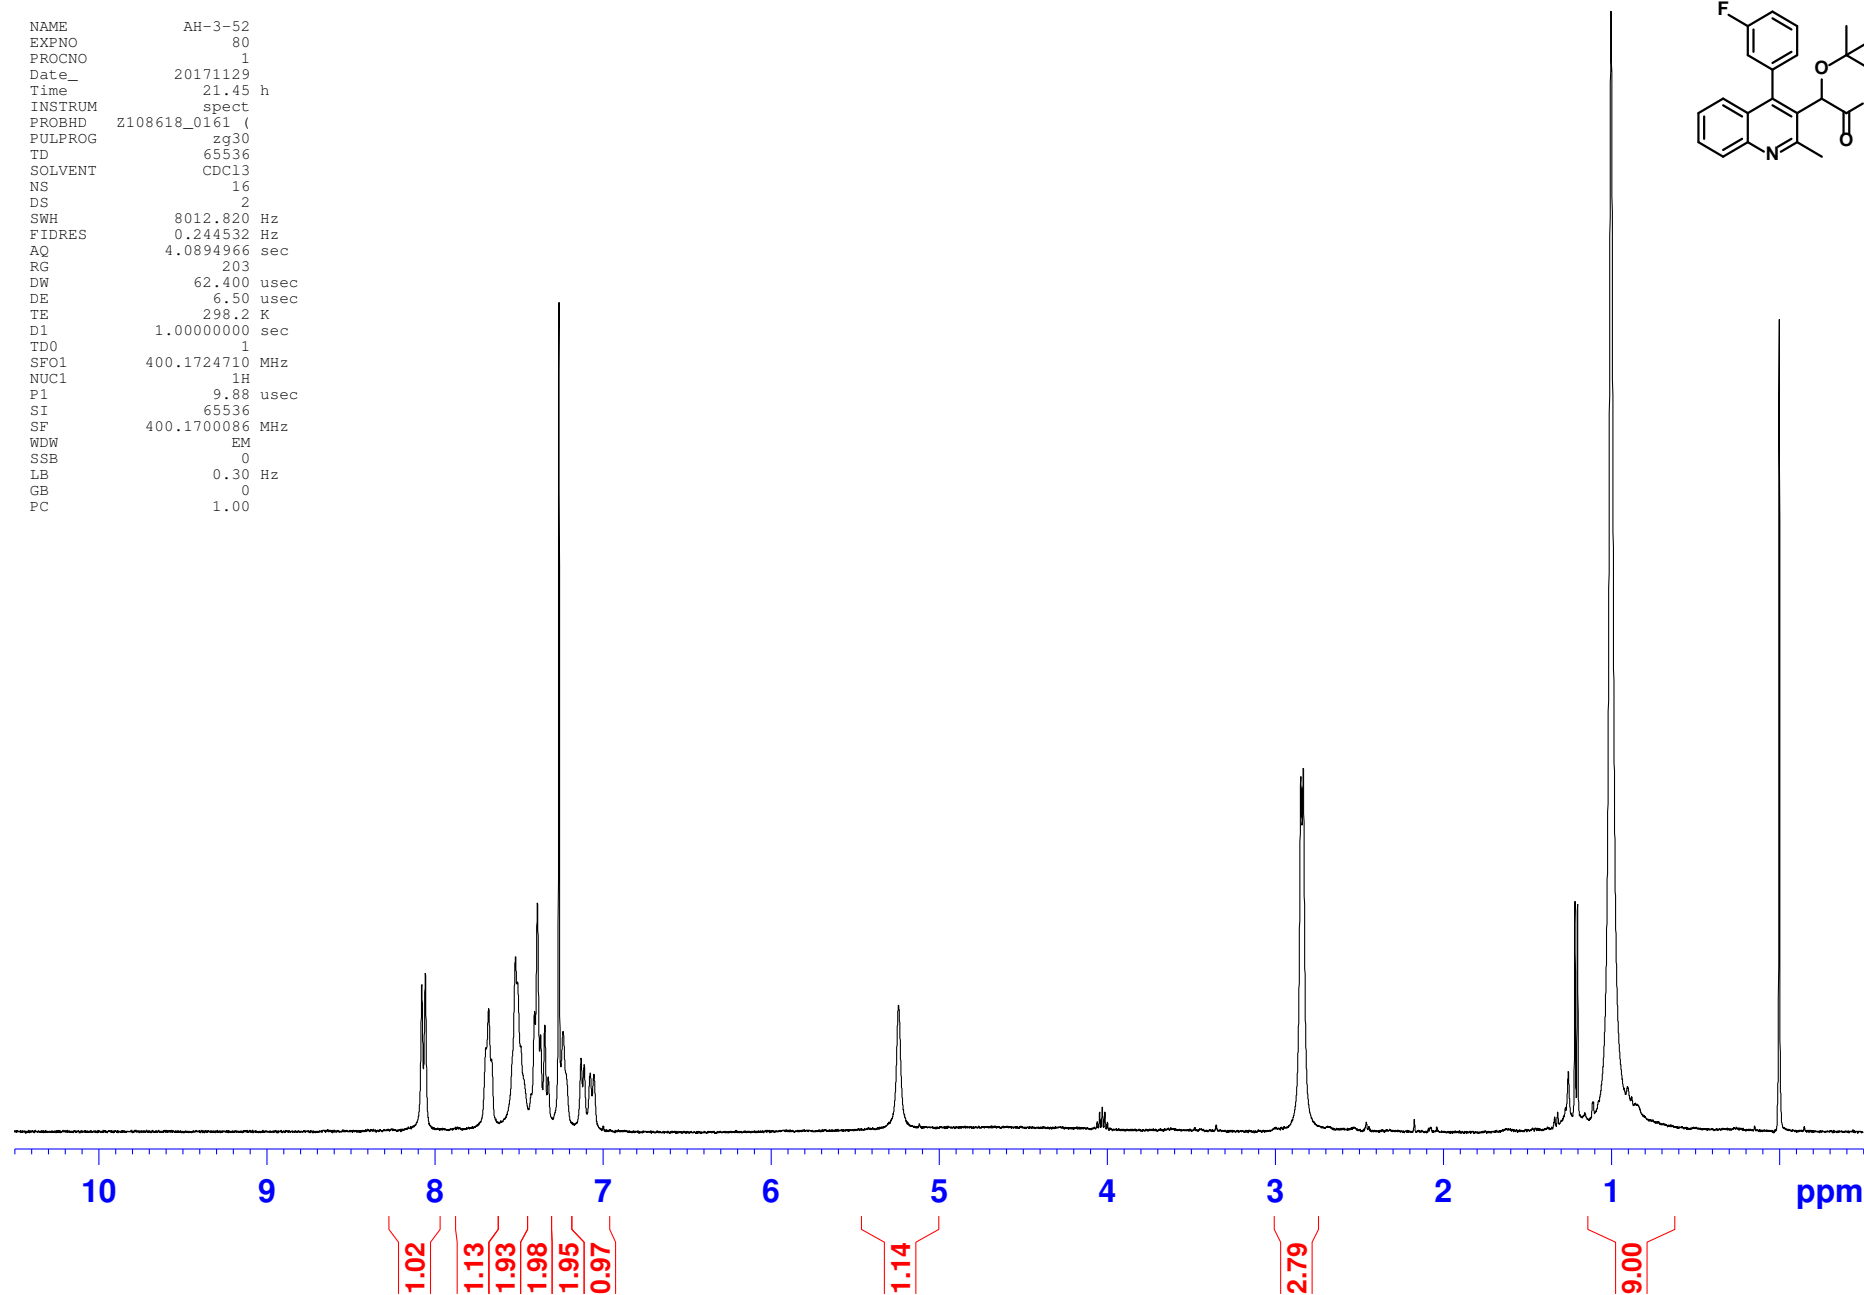

# AH-3-52 Characterization

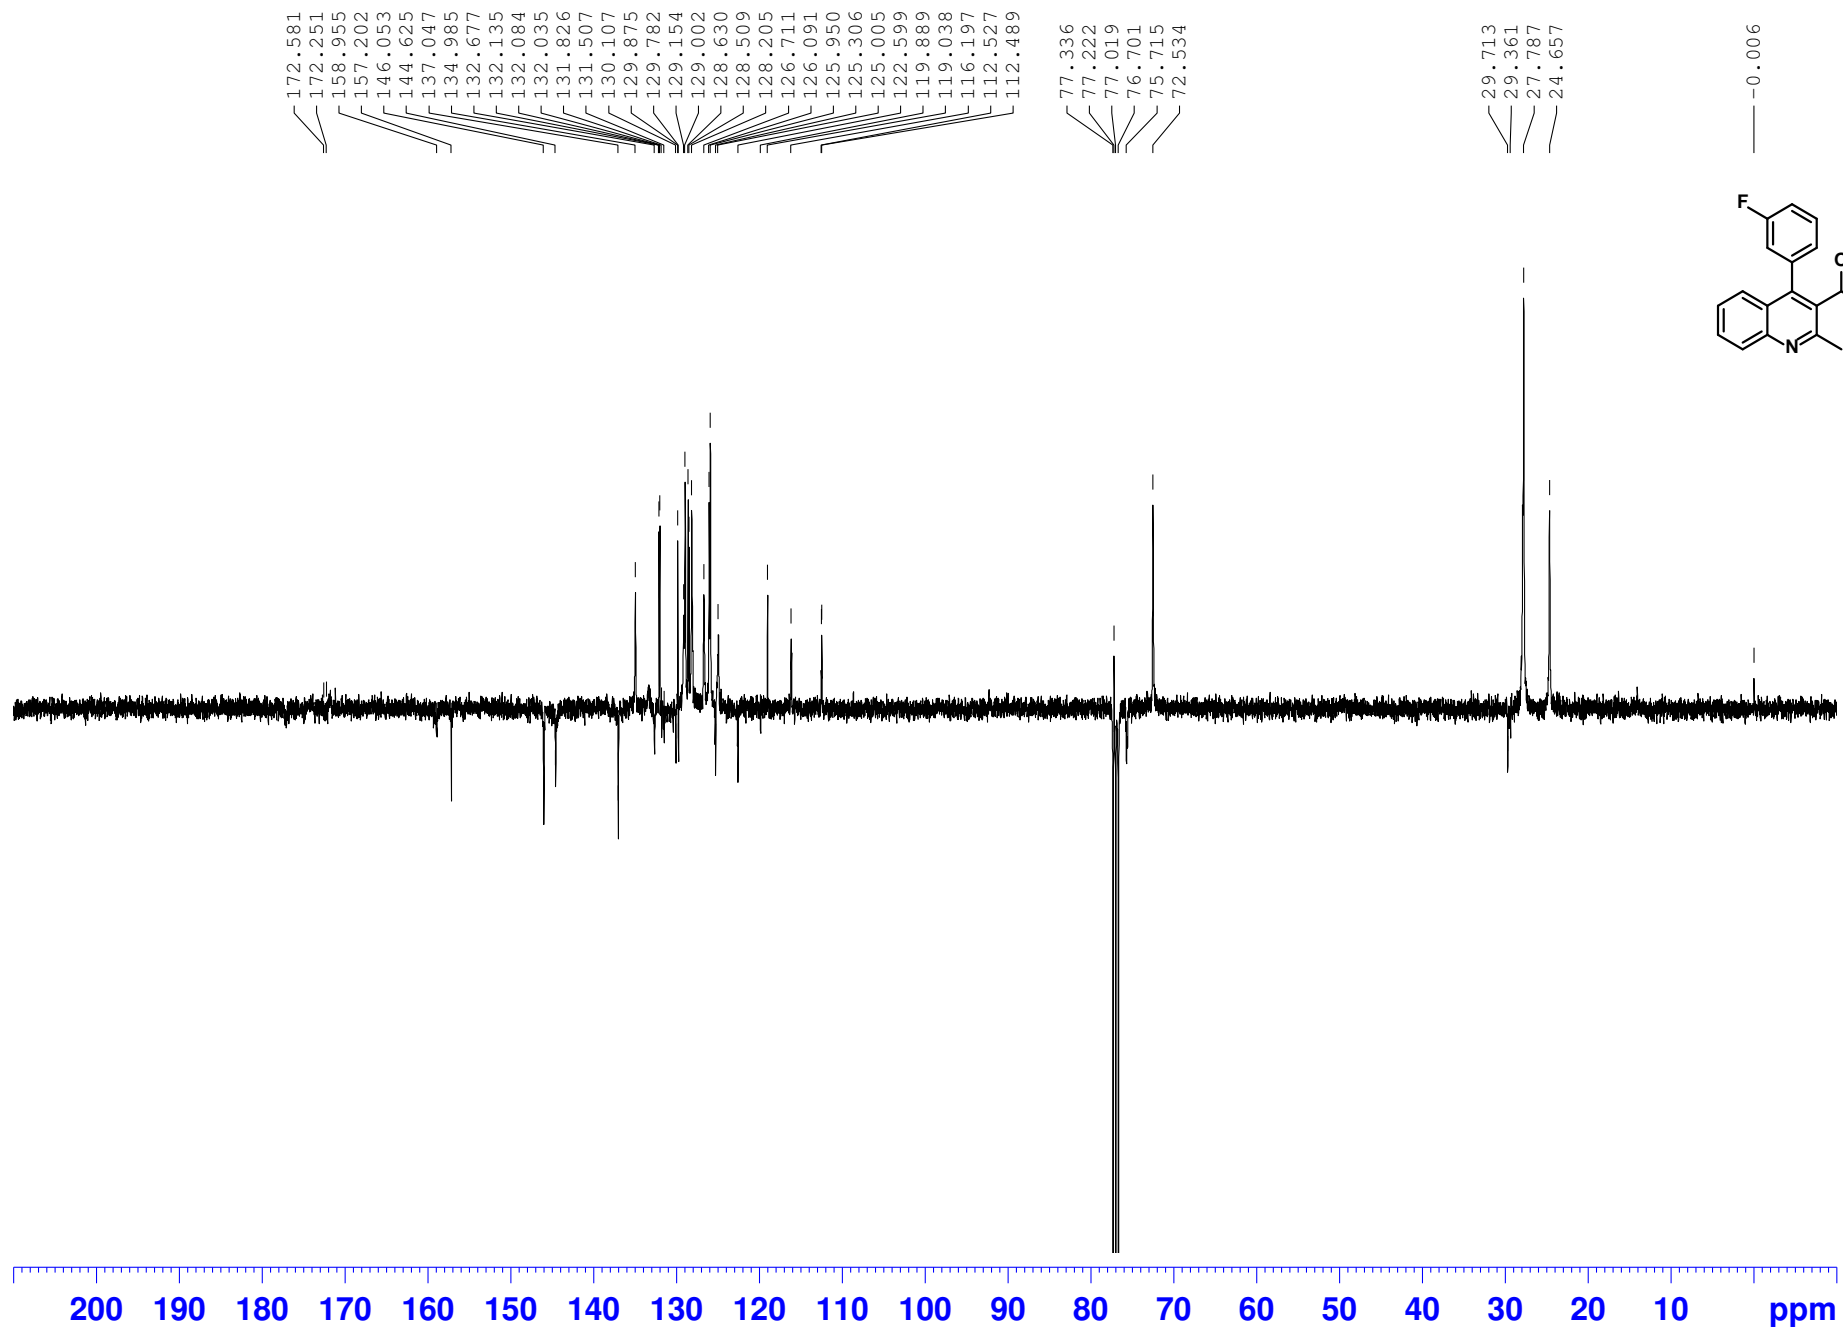



# Mass Spectrum List Report

## Analysis Info

Analysis Name F:\MS1-091514 - 080917\Data\apexdata031918\AH-3-52\_pos\_000001.d  
Method  
Sample Name AH-3-52  
Comment AH-3-52 in THF:MeOH C22H22FNO3 H+

Acquisition Date 3/19/2018 9:58:43 AM  
Operator FTMS\_USER  
Instrument apex-Qe

Sample Name AH-3-52 in THF:MeOH  
Exact Mass of C22H22FNO3 H+ = 368.165648 m/z  
Mass Observed = 368.165782 m/z

Difference < 1.0 ppm

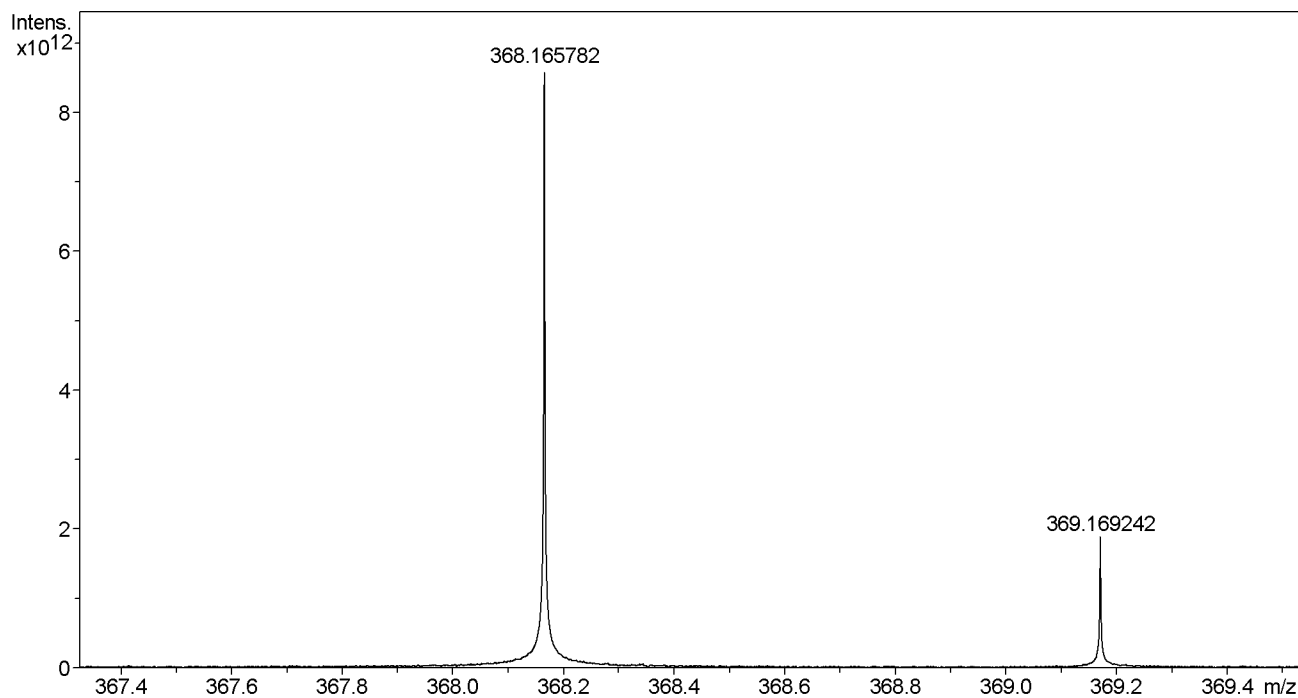

| #  | m/z        | I           |
|----|------------|-------------|
| 1  | 184.513752 | 25536860862 |
| 2  | 185.165457 | 21164275285 |
| 3  | 186.816818 | 21466734798 |
| 4  | 187.056136 | 21378278977 |
| 5  | 187.929062 | 23131997610 |
| 6  | 188.767568 | 21314475550 |
| 7  | 189.651783 | 22217139023 |
| 8  | 189.795054 | 22121851400 |
| 9  | 192.378645 | 21856081130 |
| 10 | 193.866375 | 21520593005 |
| 11 | 194.632279 | 22526132897 |
| 12 | 200.822657 | 21261306364 |
| 13 | 202.340442 | 74348764224 |
| 14 | 202.536504 | 21041884458 |
| 15 | 204.739139 | 21062310855 |
| 16 | 205.428614 | 21531596016 |
| 17 | 209.107420 | 21927788465 |
| 18 | 209.441662 | 27175144840 |
| 19 | 209.686007 | 36850880518 |
| 20 | 209.894465 | 21613473245 |

---

# Mass Spectrum List Report

---

| #  | m/z        | I            |
|----|------------|--------------|
| 21 | 210.214569 | 22218379328  |
| 22 | 212.245527 | 21103490046  |
| 23 | 215.089246 | 21766151918  |
| 24 | 215.130312 | 21881230091  |
| 25 | 215.585643 | 21965468320  |
| 26 | 215.604474 | 21295236489  |
| 27 | 216.810598 | 21305985416  |
| 28 | 223.421531 | 21600507894  |
| 29 | 229.039886 | 23243392863  |
| 30 | 229.343516 | 21216028684  |
| 31 | 231.120515 | 27787390520  |
| 32 | 236.951075 | 23580721769  |
| 33 | 239.316215 | 21362539639  |
| 34 | 239.990984 | 21262080142  |
| 35 | 240.968833 | 21538308840  |
| 36 | 243.005772 | 22191492201  |
| 37 | 245.720365 | 22051796750  |
| 38 | 246.592526 | 28127129295  |
| 39 | 247.171974 | 27185630032  |
| 40 | 247.256760 | 22212171061  |
| 41 | 248.141922 | 23933054497  |
| 42 | 249.094794 | 31930512752  |
| 43 | 254.760681 | 23151472589  |
| 44 | 261.026292 | 21937226154  |
| 45 | 262.921819 | 22874659227  |
| 46 | 264.383888 | 24336059985  |
| 47 | 278.952404 | 21729115697  |
| 48 | 279.135219 | 25998571020  |
| 49 | 280.135999 | 22180172229  |
| 50 | 280.744885 | 24878055223  |
| 51 | 281.691801 | 21813160558  |
| 52 | 283.563822 | 26365980109  |
| 53 | 286.967933 | 23365636635  |
| 54 | 287.405941 | 21531108223  |
| 55 | 288.906632 | 21360650622  |
| 56 | 290.252129 | 24233879006  |
| 57 | 297.178858 | 22587170238  |
| 58 | 301.075617 | 159740273456 |
| 59 | 301.125980 | 24038498089  |
| 60 | 302.078964 | 28894372060  |
| 61 | 302.797851 | 23380147303  |
| 62 | 303.141689 | 28903553778  |
| 63 | 304.361163 | 22164050021  |
| 64 | 312.103372 | 24562198384  |
| 65 | 316.209614 | 22623013371  |
| 66 | 317.121183 | 26816702130  |
| 67 | 317.569137 | 26075066880  |
| 68 | 318.601975 | 22049306726  |
| 69 | 324.176116 | 35791154357  |
| 70 | 325.372969 | 22833963694  |
| 71 | 326.837166 | 21988882421  |
| 72 | 328.575152 | 21723204903  |
| 73 | 338.708972 | 22097960561  |
| 74 | 345.243207 | 22687803230  |
| 75 | 359.714796 | 22730851042  |
| 76 | 361.552250 | 24134585987  |
| 77 | 364.525314 | 22135271779  |
| 78 | 366.408975 | 28084947176  |
| 79 | 366.714016 | 22525262664  |
| 80 | 366.877151 | 40324143848  |
| 81 | 366.888742 | 32181469765  |
| 82 | 367.416958 | 24400588411  |
| 83 | 367.673149 | 25585317149  |
| 84 | 367.710196 | 25718874500  |

---

# Mass Spectrum List Report

---

| #   | m/z        | I             |
|-----|------------|---------------|
| 85  | 367.740828 | 22372185698   |
| 86  | 367.808567 | 26146500755   |
| 87  | 367.827007 | 27876188969   |
| 88  | 367.846589 | 29230621414   |
| 89  | 367.883816 | 28863612248   |
| 90  | 367.938103 | 36789191410   |
| 91  | 368.004014 | 42628337601   |
| 92  | 368.032680 | 53792423453   |
| 93  | 368.094062 | 90015418278   |
| 94  | 368.165782 | 8626882596036 |
| 95  | 368.275282 | 62643183134   |
| 96  | 368.323477 | 45624028400   |
| 97  | 368.344343 | 53454204004   |
| 98  | 368.358014 | 37996467061   |
| 99  | 368.412211 | 30793770588   |
| 100 | 368.445227 | 29869946099   |
| 101 | 368.459939 | 30110115451   |
| 102 | 368.484220 | 24683809123   |
| 103 | 368.517886 | 25845734543   |
| 104 | 368.553724 | 24982865648   |
| 105 | 368.569125 | 25043729445   |
| 106 | 368.632727 | 22758812189   |
| 107 | 369.089846 | 26932161995   |
| 108 | 369.169242 | 1894591467481 |
| 109 | 369.253460 | 26386831482   |
| 110 | 369.288520 | 22865284715   |
| 111 | 369.426065 | 23365825160   |
| 112 | 369.451615 | 25249659866   |
| 113 | 369.882701 | 109480772953  |
| 114 | 370.172783 | 124394313774  |
| 115 | 372.980550 | 23366986522   |
| 116 | 377.834152 | 22780234100   |
| 117 | 380.871438 | 23410195605   |
| 118 | 390.022935 | 22893313439   |
| 119 | 390.100160 | 23763968318   |
| 120 | 390.147950 | 721318913164  |
| 121 | 391.151393 | 136283030663  |
| 122 | 393.107551 | 22194345451   |
| 123 | 393.297862 | 30376984735   |
| 124 | 395.688679 | 25144038605   |
| 125 | 398.241827 | 134071281599  |
| 126 | 398.547820 | 22332167375   |
| 127 | 412.130024 | 242737896944  |
| 128 | 413.133304 | 59882735233   |
| 129 | 424.228786 | 43999461353   |
| 130 | 425.243658 | 24198848112   |
| 131 | 425.287860 | 49034638077   |
| 132 | 428.850227 | 22909877194   |
| 133 | 430.890260 | 24507380547   |
| 134 | 435.345101 | 52632590222   |
| 135 | 439.082782 | 23259636133   |
| 136 | 440.598878 | 22283196704   |
| 137 | 445.705531 | 24349636446   |
| 138 | 456.443943 | 23659369657   |
| 139 | 459.170306 | 41841248706   |
| 140 | 460.173489 | 24672615607   |
| 141 | 461.185722 | 58974456000   |
| 142 | 465.380082 | 26024108259   |
| 143 | 470.088257 | 26602302887   |
| 144 | 477.180631 | 531327824969  |
| 145 | 477.257226 | 23799301196   |
| 146 | 478.184071 | 105778187650  |
| 147 | 490.913441 | 22500777630   |
| 148 | 491.160095 | 38003696675   |

---

# Mass Spectrum List Report

---

| #   | m/z        | I             |
|-----|------------|---------------|
| 149 | 491.196430 | 27427774827   |
| 150 | 492.894101 | 24280307115   |
| 151 | 492.987853 | 25160585304   |
| 152 | 493.044228 | 23206824217   |
| 153 | 493.175478 | 2180530039904 |
| 154 | 493.324347 | 23883134976   |
| 155 | 493.820086 | 22898963228   |
| 156 | 493.890853 | 24235356701   |
| 157 | 494.178933 | 512186710438  |
| 158 | 495.182513 | 32849685734   |
| 159 | 500.511538 | 22443803184   |
| 160 | 503.550406 | 24978333039   |
| 161 | 505.413449 | 22231898342   |
| 162 | 508.582357 | 84708495208   |
| 163 | 509.207051 | 31806122525   |
| 164 | 509.585535 | 31107764164   |
| 165 | 516.797420 | 22539094905   |
| 166 | 519.441253 | 23977856732   |
| 167 | 523.186275 | 55795891090   |
| 168 | 524.576914 | 27330039985   |
| 169 | 536.613514 | 394423453273  |
| 170 | 537.616825 | 120697252873  |
| 171 | 538.620051 | 23506335111   |
| 172 | 552.608256 | 35046034097   |
| 173 | 554.367447 | 22769023858   |
| 174 | 554.707119 | 22333109033   |
| 175 | 557.825884 | 22962426010   |
| 176 | 564.645046 | 67858071615   |
| 177 | 572.908421 | 22312500884   |
| 178 | 579.058184 | 29722271657   |
| 179 | 579.162035 | 597201935235  |
| 180 | 580.165468 | 189870772834  |
| 181 | 581.169118 | 27401019185   |
| 182 | 588.235156 | 390718164364  |
| 183 | 589.238518 | 93894546971   |
| 184 | 592.676301 | 98862809952   |
| 185 | 593.679603 | 33015329109   |
| 186 | 599.549172 | 45452581601   |
| 187 | 600.552551 | 22950012419   |
| 188 | 613.429344 | 35106917774   |
| 189 | 630.441885 | 23195524934   |
| 190 | 646.194237 | 46983617326   |
| 191 | 646.252602 | 218230767064  |
| 192 | 647.255965 | 85577610341   |
| 193 | 657.455871 | 40310293881   |
| 194 | 668.234185 | 36792908122   |
| 195 | 681.936275 | 24602701001   |
| 196 | 685.436513 | 27180713062   |
| 197 | 697.259049 | 22795445474   |
| 198 | 704.290201 | 23931998135   |
| 199 | 712.747506 | 23421842116   |
| 200 | 743.514537 | 23698065842   |
| 201 | 744.711116 | 22706064918   |
| 202 | 762.575721 | 22777697581   |
| 203 | 767.865826 | 24617232976   |
| 204 | 801.686229 | 22810880372   |
| 205 | 815.047647 | 23032860180   |
| 206 | 824.203671 | 22834824121   |
| 207 | 837.024307 | 25847865437   |
| 208 | 861.541762 | 24591085278   |
| 209 | 955.290860 | 23828651378   |

# AH-3-61 Characterization

NAME AH-3-61  
EXPNO 80  
PROCNO 1  
Date\_ 20171221  
Time 8.19 h  
INSTRUM spect  
PROBHD z108618\_0161 (  
PULPROG zg30  
TD 65536  
SOLVENT CDC13  
NS 16  
DS 2  
SWH 8012.820 Hz  
FIDRES 0.244532 Hz  
AQ 4.0894966 sec  
RG 203  
DW 62.400 usec  
DE 6.50 usec  
TE 298.2 K  
D1 1.00000000 sec  
TDO 1  
SFO1 400.1724710 MHz  
NUC1 1H  
P1 9.88 usec  
SI 65536  
SF 400.1700092 MHz  
WDW EM  
SSB 0  
LB 0.30 Hz  
GB 0  
PC 1.00

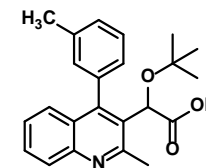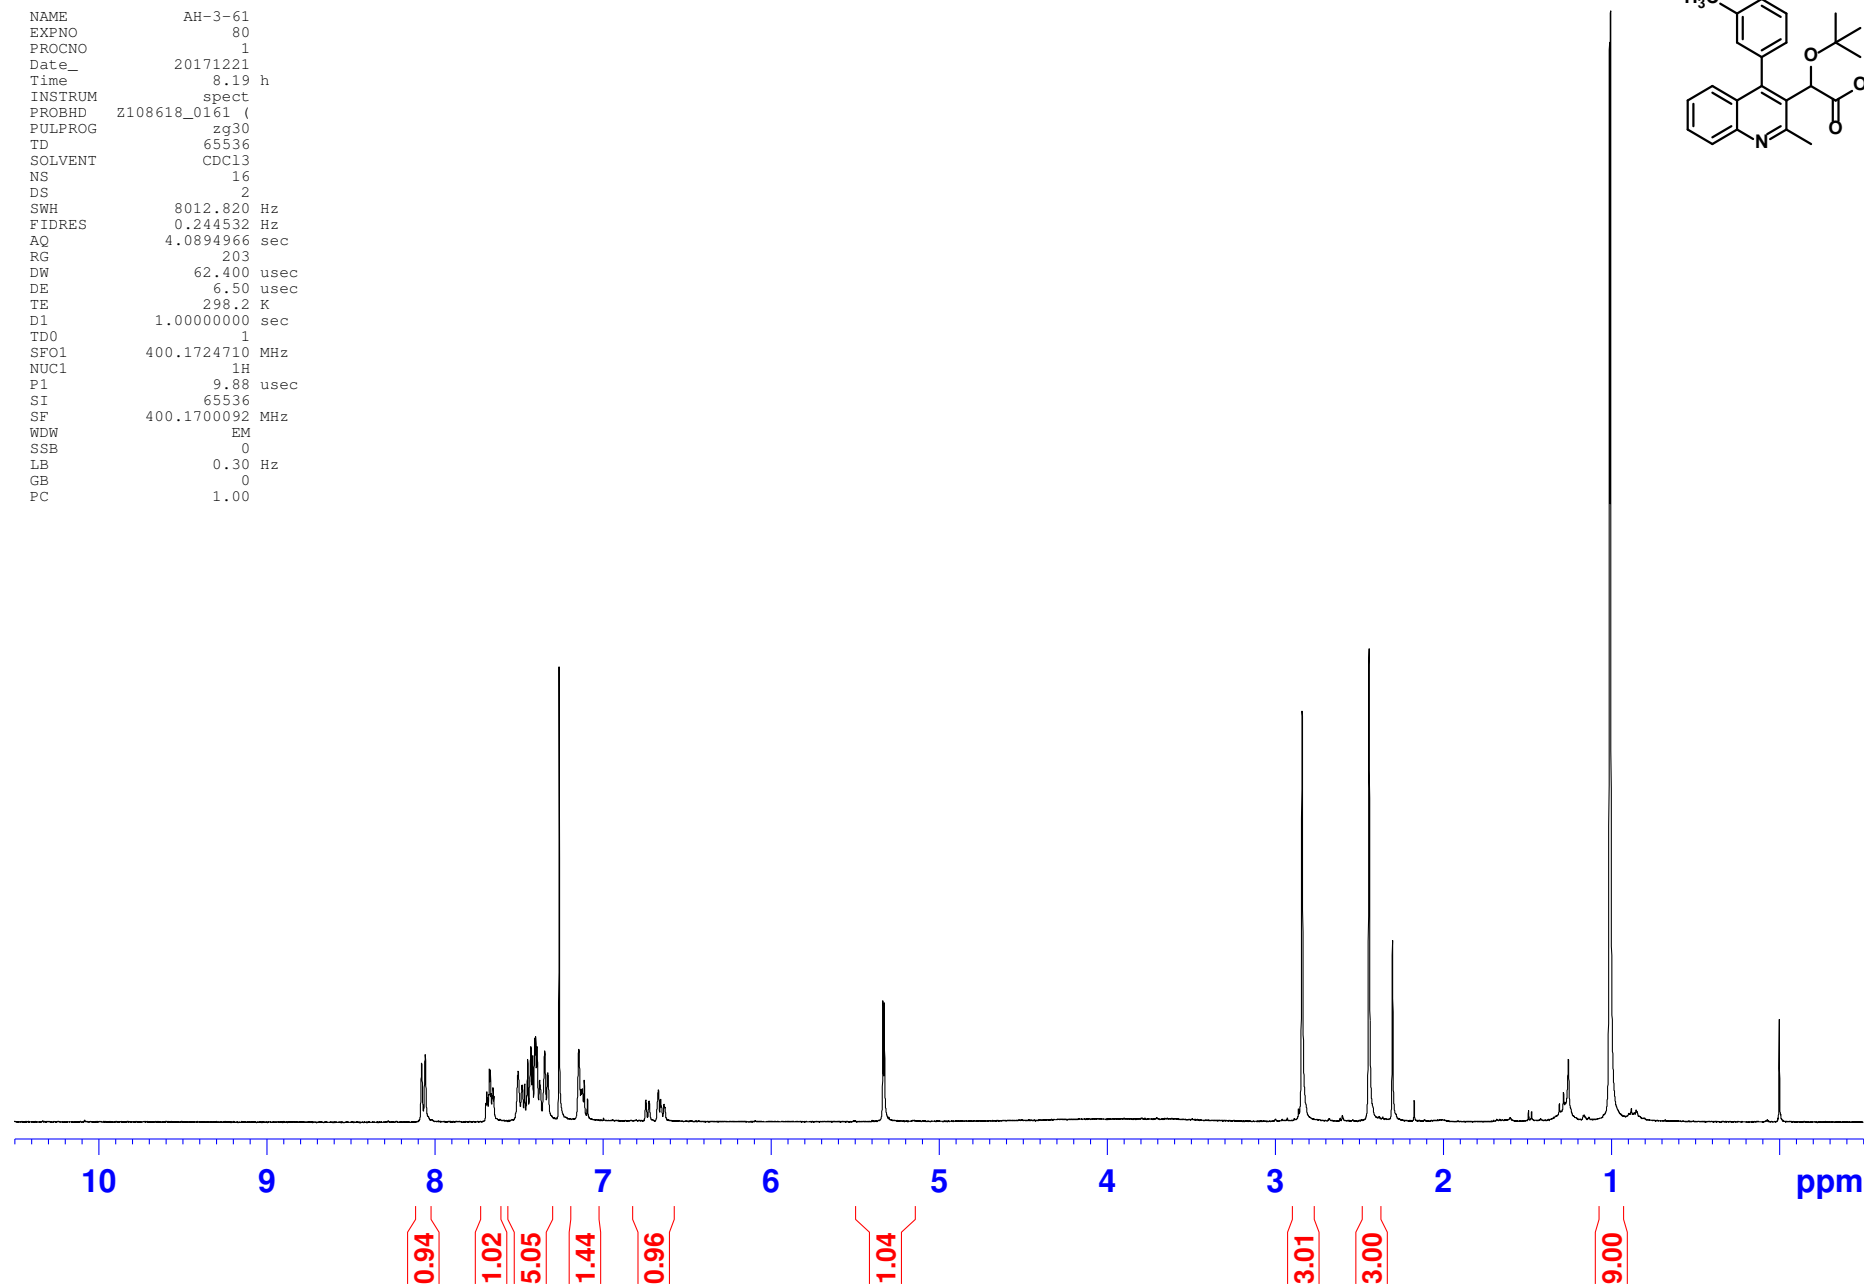

AH-3-61 Characterization

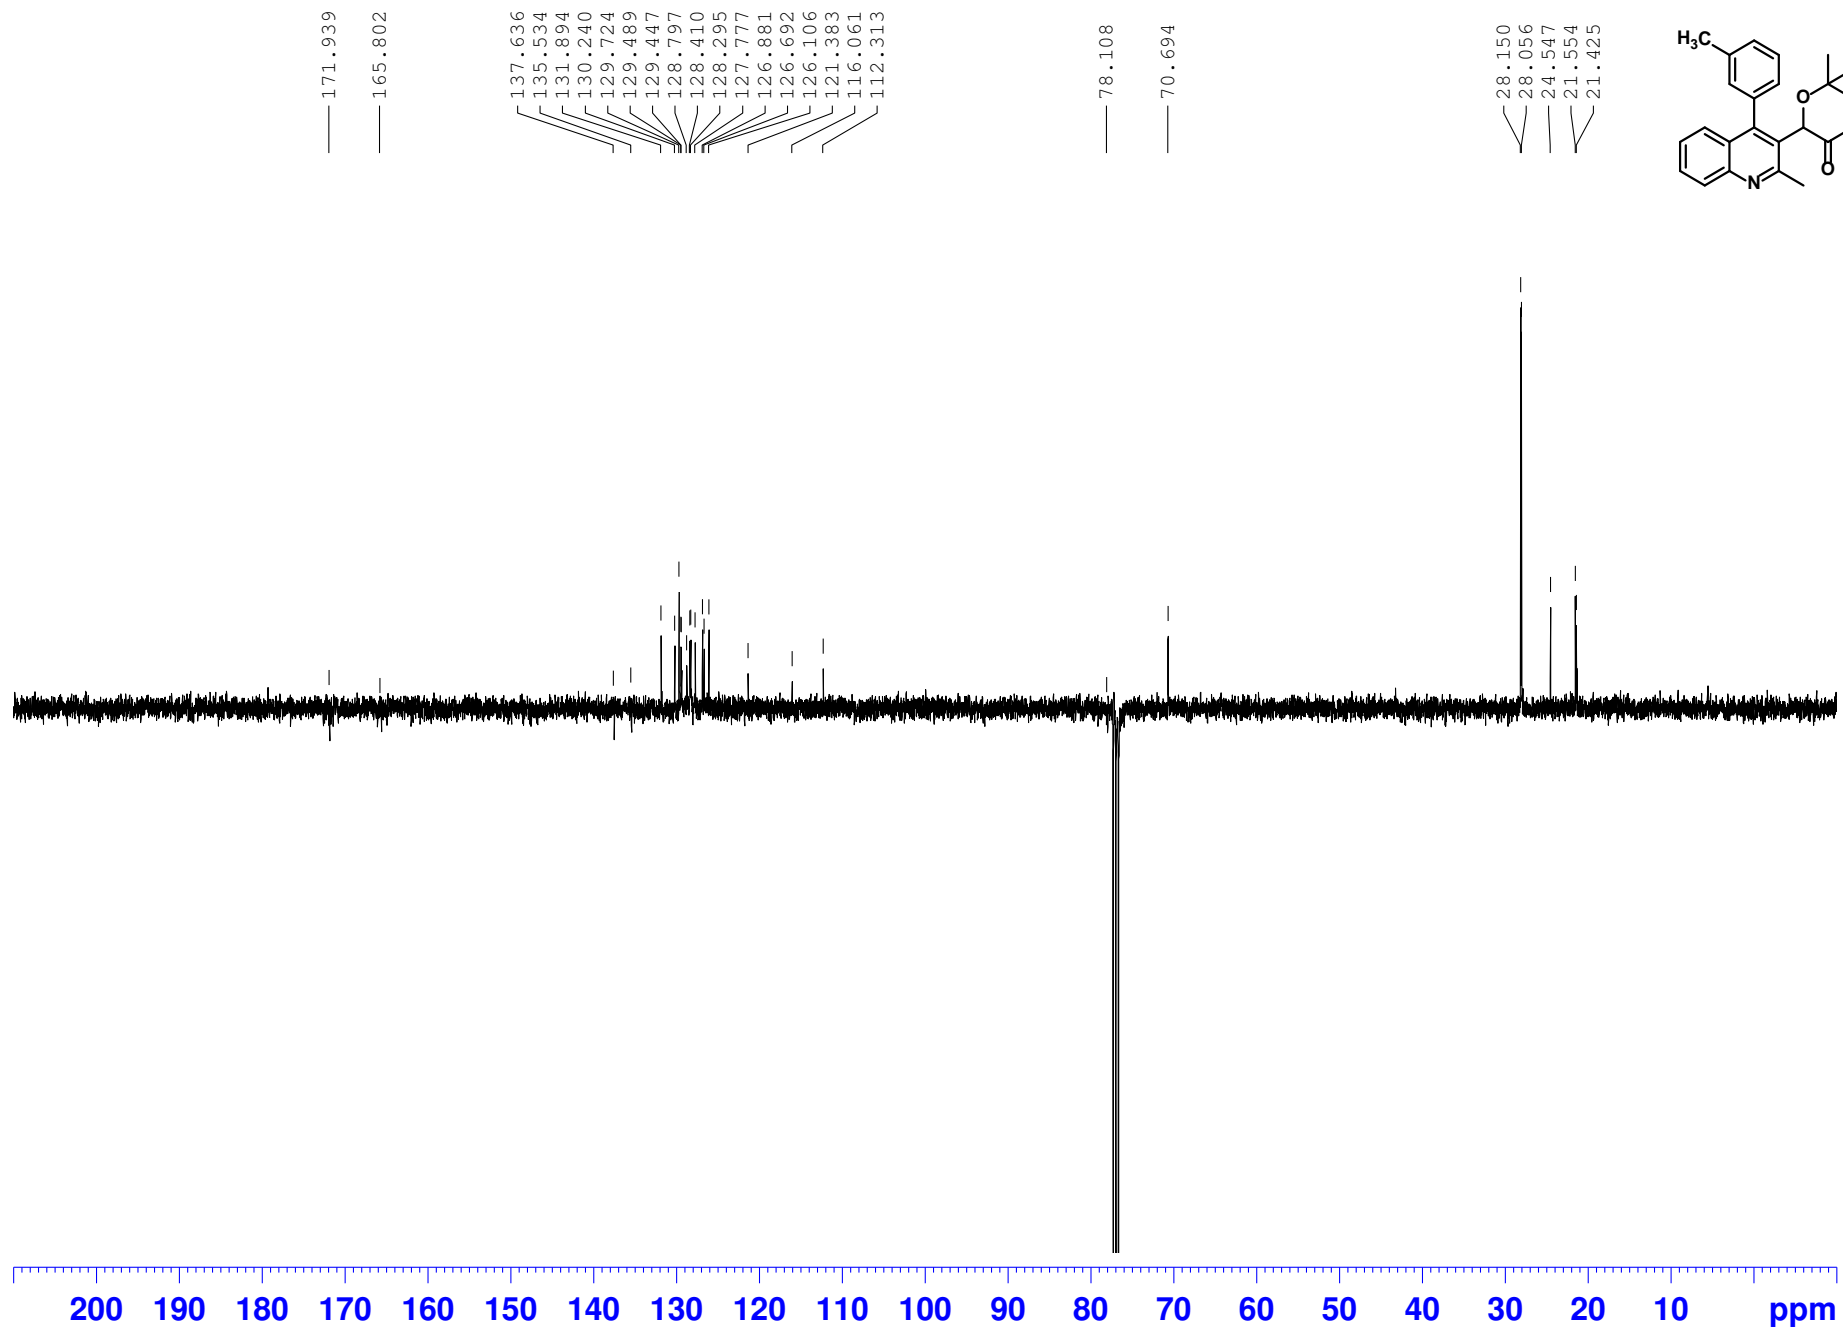

# Mass Spectrum List Report

## Analysis Info

Analysis Name F:\MS1-091514 - 080917\Data\apexdata031918\AH-3-61\_pos\_000001.d  
Method  
Sample Name AH-3-61  
Comment AH-3-61 in THF:MeOH C23H25NO3 H+

Acquisition Date 3/19/2018 9:52:39 AM  
Operator FTMS\_USER  
Instrument apex-Qe

Sample Name AH-3-61 in THF:MeOH  
Exact Mass of C23H25NO3 H+ = 364.190720 m/z  
Mass Observed = 364.190736 m/z

Difference < 1.0 ppm

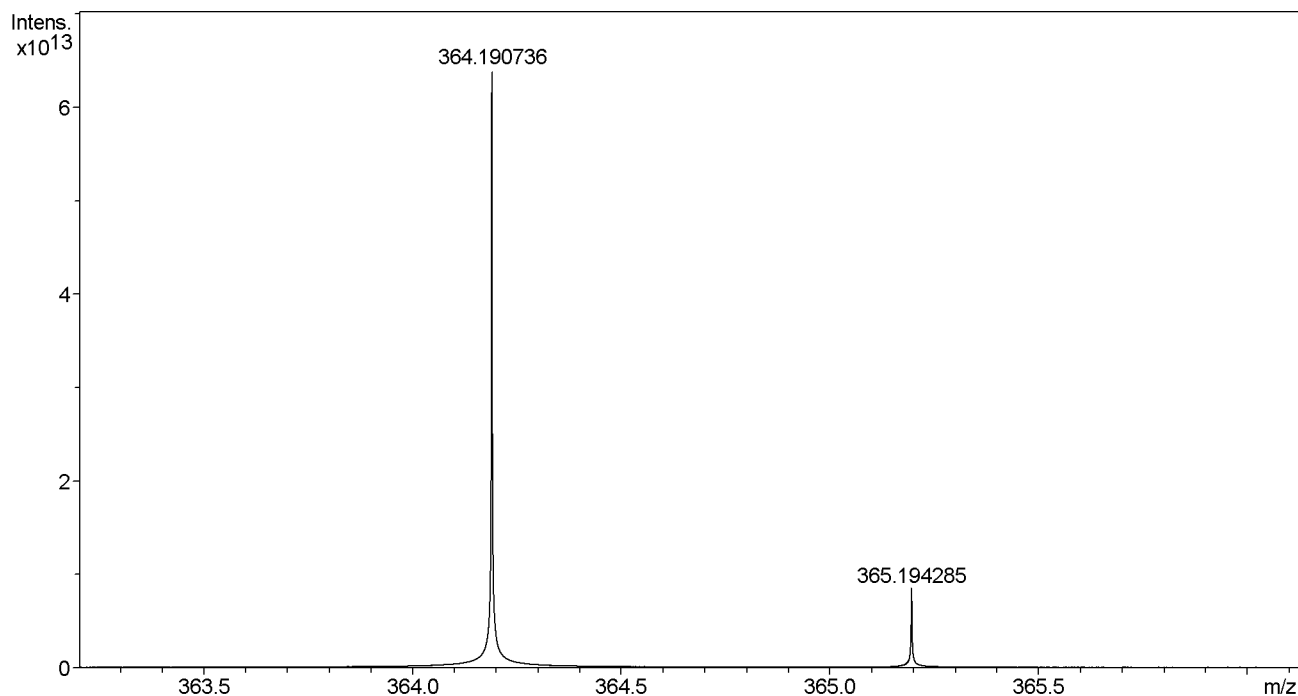

| #  | m/z        | I            |
|----|------------|--------------|
| 1  | 184.313478 | 23140322341  |
| 2  | 186.031022 | 27311889616  |
| 3  | 186.102546 | 29442334961  |
| 4  | 186.554781 | 313914080069 |
| 5  | 186.875101 | 24486097269  |
| 6  | 187.651594 | 22081109984  |
| 7  | 190.172477 | 21882455245  |
| 8  | 190.897225 | 21471860563  |
| 9  | 192.144313 | 23845132004  |
| 10 | 193.866735 | 22787421527  |
| 11 | 193.991547 | 21798788728  |
| 12 | 194.891295 | 23095550661  |
| 13 | 196.846687 | 21280090802  |
| 14 | 200.020657 | 21179973824  |
| 15 | 200.423340 | 21983580256  |
| 16 | 200.630591 | 21254788416  |
| 17 | 203.073077 | 22506996229  |
| 18 | 203.470548 | 22600768792  |
| 19 | 203.554973 | 23098838801  |
| 20 | 207.668154 | 23304951521  |

---

# Mass Spectrum List Report

---

| #  | m/z        | I           |
|----|------------|-------------|
| 21 | 209.441585 | 45756103396 |
| 22 | 209.886788 | 21314831103 |
| 23 | 210.651286 | 23734631960 |
| 24 | 216.081071 | 23492578754 |
| 25 | 216.309527 | 21666868974 |
| 26 | 217.088552 | 26621441673 |
| 27 | 218.096310 | 27583870407 |
| 28 | 219.871073 | 22051149121 |
| 29 | 220.856163 | 24238483475 |
| 30 | 223.530788 | 21395230504 |
| 31 | 225.923812 | 21276165974 |
| 32 | 227.776849 | 21751235575 |
| 33 | 227.815699 | 22936034253 |
| 34 | 228.326920 | 21310082964 |
| 35 | 228.823449 | 23705216203 |
| 36 | 228.884447 | 22998148155 |
| 37 | 230.096655 | 24406905122 |
| 38 | 230.637053 | 21834576603 |
| 39 | 231.104355 | 21269955459 |
| 40 | 232.112307 | 35570069126 |
| 41 | 233.094644 | 22549669594 |
| 42 | 233.882760 | 24075758558 |
| 43 | 241.564126 | 21262059606 |
| 44 | 241.586047 | 21355452216 |
| 45 | 241.734790 | 22282345116 |
| 46 | 244.112385 | 30661770439 |
| 47 | 246.091379 | 23977459582 |
| 48 | 246.128012 | 36517346787 |
| 49 | 247.099051 | 24263988909 |
| 50 | 248.107262 | 27245670941 |
| 51 | 252.602547 | 21849607135 |
| 52 | 257.377987 | 21305768158 |
| 53 | 258.064977 | 22095801673 |
| 54 | 259.557982 | 21342712552 |
| 55 | 261.564940 | 23265441150 |
| 56 | 261.876045 | 22171233402 |
| 57 | 262.122858 | 34150283442 |
| 58 | 262.937759 | 21774548990 |
| 59 | 263.125984 | 35585175170 |
| 60 | 263.130608 | 29131170958 |
| 61 | 263.403269 | 21246853736 |
| 62 | 263.411515 | 22041836499 |
| 63 | 264.129166 | 22342762594 |
| 64 | 264.201211 | 22693156606 |
| 65 | 269.645884 | 21718822121 |
| 66 | 273.188965 | 21539465121 |
| 67 | 273.780784 | 22125931104 |
| 68 | 275.409600 | 23000017284 |
| 69 | 276.102098 | 26013201969 |
| 70 | 283.563705 | 36037233504 |
| 71 | 283.783055 | 25273132259 |
| 72 | 286.536348 | 21305827298 |
| 73 | 286.785237 | 23571820771 |
| 74 | 288.670642 | 23129099973 |
| 75 | 289.012660 | 22903575841 |
| 76 | 289.232092 | 24728441310 |
| 77 | 291.154092 | 24607979782 |
| 78 | 293.952600 | 22944448715 |
| 79 | 296.542348 | 21351650105 |
| 80 | 296.763227 | 22231350148 |
| 81 | 304.732740 | 23899903590 |
| 82 | 305.505650 | 24918981656 |
| 83 | 306.112750 | 25315752070 |
| 84 | 308.091902 | 21967191489 |



---

# Mass Spectrum List Report

---

| #   | m/z        | I             |
|-----|------------|---------------|
| 85  | 308.127737 | 44571068361   |
| 86  | 309.131287 | 27884773661   |
| 87  | 311.037095 | 22029160847   |
| 88  | 312.099989 | 21599652119   |
| 89  | 320.089924 | 24725615014   |
| 90  | 320.136192 | 26401316624   |
| 91  | 320.201235 | 2310475687170 |
| 92  | 320.263568 | 36419218475   |
| 93  | 320.274602 | 22367229409   |
| 94  | 320.327389 | 23011781444   |
| 95  | 321.204668 | 387180623599  |
| 96  | 332.697713 | 25547471614   |
| 97  | 343.869794 | 23578819519   |
| 98  | 352.191213 | 544971670944  |
| 99  | 353.194635 | 72196704371   |
| 100 | 360.137875 | 25951736782   |
| 101 | 361.009285 | 25340596287   |
| 102 | 361.044869 | 26090529792   |
| 103 | 361.247797 | 25910399392   |
| 104 | 361.509019 | 27716338087   |
| 105 | 361.550628 | 25042411165   |
| 106 | 361.568529 | 28061481793   |
| 107 | 361.611755 | 28162386284   |
| 108 | 361.714239 | 26702955073   |
| 109 | 361.745291 | 25348172502   |
| 110 | 361.765118 | 27330770040   |
| 111 | 361.783212 | 25697434280   |
| 112 | 361.857416 | 26382812868   |
| 113 | 361.909353 | 28467701038   |
| 114 | 361.964592 | 33201901380   |
| 115 | 362.025520 | 30741574674   |
| 116 | 362.083691 | 27217124694   |
| 117 | 362.157896 | 30798758456   |
| 118 | 362.253414 | 31033356307   |
| 119 | 362.307596 | 27476930827   |
| 120 | 362.316037 | 35297428544   |
| 121 | 362.379701 | 31394424414   |
| 122 | 362.400494 | 31031622008   |
| 123 | 362.445662 | 33688292185   |
| 124 | 362.467043 | 29082311059   |
| 125 | 362.528845 | 34698606451   |
| 126 | 362.625819 | 36777165391   |
| 127 | 362.697472 | 32916858982   |
| 128 | 362.787279 | 35508033599   |
| 129 | 362.806069 | 33216835898   |
| 130 | 362.822274 | 41457213741   |
| 131 | 362.854816 | 40545889181   |
| 132 | 362.902011 | 40962421512   |
| 133 | 362.939397 | 40781543315   |
| 134 | 362.985398 | 38952776649   |
| 135 | 363.010321 | 39327989786   |
| 136 | 363.058165 | 41651493481   |
| 137 | 363.104888 | 42758616297   |
| 138 | 363.140010 | 46788753354   |
| 139 | 363.181817 | 61129172756   |
| 140 | 363.196450 | 45792005997   |
| 141 | 363.300712 | 51117867841   |
| 142 | 363.331521 | 51844615118   |
| 143 | 363.344601 | 52008175323   |
| 144 | 363.379066 | 49872852081   |
| 145 | 363.417596 | 53227509445   |
| 146 | 363.444213 | 59717778609   |
| 147 | 363.528522 | 65249565729   |
| 148 | 363.554132 | 63708893379   |

---

# Mass Spectrum List Report

---

| #   | m/z        | I              |
|-----|------------|----------------|
| 149 | 363.615066 | 73357875392    |
| 150 | 363.638492 | 66416456741    |
| 151 | 363.724607 | 90793264198    |
| 152 | 363.733054 | 88343858016    |
| 153 | 363.748755 | 87822552276    |
| 154 | 363.762309 | 93699871521    |
| 155 | 363.880363 | 125664891863   |
| 156 | 364.190736 | 63966246025901 |
| 157 | 364.495218 | 124236447168   |
| 158 | 364.707531 | 73724047509    |
| 159 | 364.731722 | 72926599502    |
| 160 | 364.766648 | 65676965171    |
| 161 | 364.814248 | 72692947268    |
| 162 | 364.868140 | 63064619675    |
| 163 | 364.954186 | 58299995214    |
| 164 | 364.986290 | 58181127054    |
| 165 | 365.013858 | 65552666494    |
| 166 | 365.114193 | 82959008998    |
| 167 | 365.194285 | 8526829656527  |
| 168 | 365.331967 | 70927635148    |
| 169 | 365.342760 | 63495020264    |
| 170 | 365.418750 | 50522123758    |
| 171 | 365.536215 | 41852347024    |
| 172 | 365.600900 | 42956987317    |
| 173 | 365.626393 | 41299298338    |
| 174 | 365.653094 | 43752570671    |
| 175 | 365.705430 | 40162352161    |
| 176 | 365.785790 | 38616473168    |
| 177 | 365.804647 | 38970076241    |
| 178 | 365.817616 | 34590424386    |
| 179 | 365.827836 | 34150743276    |
| 180 | 365.868046 | 35205333034    |
| 181 | 365.903643 | 39414212629    |
| 182 | 365.950124 | 37166687191    |
| 183 | 365.979045 | 37617205958    |
| 184 | 366.017510 | 35499416053    |
| 185 | 366.069630 | 30531457567    |
| 186 | 366.127541 | 32143808245    |
| 187 | 366.197951 | 433369221643   |
| 188 | 366.239031 | 37807526354    |
| 189 | 366.275531 | 36408612447    |
| 190 | 366.289054 | 31381200779    |
| 191 | 366.307144 | 33380903334    |
| 192 | 366.378425 | 28231200763    |
| 193 | 366.479974 | 29175833978    |
| 194 | 366.587831 | 27307097750    |
| 195 | 366.621648 | 28885014445    |
| 196 | 366.770104 | 26878393869    |
| 197 | 366.818838 | 29325711753    |
| 198 | 366.872129 | 29021753843    |
| 199 | 366.913084 | 26283048400    |
| 200 | 366.963424 | 25340054487    |
| 201 | 367.063323 | 27348841598    |
| 202 | 367.110807 | 26209309450    |
| 203 | 367.163881 | 32192314698    |
| 204 | 367.471475 | 27233865618    |
| 205 | 367.601183 | 25452053809    |
| 206 | 368.311559 | 27894879192    |
| 207 | 368.502988 | 25554497285    |
| 208 | 379.181837 | 94582257712    |
| 209 | 382.464476 | 1171241100993  |
| 210 | 386.173133 | 739041673730   |
| 211 | 386.858522 | 25129165048    |
| 212 | 387.174587 | 41284558019    |

---

# Mass Spectrum List Report

---

| #   | m/z        | I            |
|-----|------------|--------------|
| 213 | 387.176721 | 88108659345  |
| 214 | 398.242334 | 33669782936  |
| 215 | 408.155379 | 93043637848  |
| 216 | 425.288109 | 33801132903  |
| 217 | 425.936132 | 22179968114  |
| 218 | 425.946678 | 23086661542  |
| 219 | 426.792346 | 21905675464  |
| 220 | 435.345365 | 40580702148  |
| 221 | 441.736088 | 22690669959  |
| 222 | 449.442535 | 22323518375  |
| 223 | 453.268834 | 21587080302  |
| 224 | 453.407341 | 32392979740  |
| 225 | 454.692361 | 22146049940  |
| 226 | 458.365175 | 21892214848  |
| 227 | 478.892532 | 22280460616  |
| 228 | 478.989841 | 21920434853  |
| 229 | 481.351499 | 23667373129  |
| 230 | 489.724914 | 23713961452  |
| 231 | 500.343813 | 24016406913  |
| 232 | 502.570624 | 22705582113  |
| 233 | 508.582708 | 75817914978  |
| 234 | 509.585680 | 24125043582  |
| 235 | 525.001907 | 24690669694  |
| 236 | 536.614020 | 324203879885 |
| 237 | 537.267861 | 84423406707  |
| 238 | 537.395878 | 63321762922  |
| 239 | 537.617325 | 104824225939 |
| 240 | 539.264672 | 29081080882  |
| 241 | 542.609184 | 23875800037  |
| 242 | 552.609077 | 36982596295  |
| 243 | 558.563258 | 24839459529  |
| 244 | 563.219348 | 24723575293  |
| 245 | 564.645669 | 53908498398  |
| 246 | 569.403802 | 28047202044  |
| 247 | 581.257929 | 47997717176  |
| 248 | 583.273763 | 38963668460  |
| 249 | 592.676964 | 79475362125  |
| 250 | 593.680013 | 35959609374  |
| 251 | 596.124523 | 22231100371  |
| 252 | 596.583173 | 22772850407  |
| 253 | 597.213562 | 22482749549  |
| 254 | 599.549961 | 26272022078  |
| 255 | 601.031927 | 22917979301  |
| 256 | 613.429856 | 32156382329  |
| 257 | 645.409771 | 24602474691  |
| 258 | 652.187686 | 22657222987  |
| 259 | 652.257507 | 23854661454  |
| 260 | 657.456615 | 36307318888  |
| 261 | 658.459425 | 22433251977  |
| 262 | 662.105160 | 24536553680  |
| 263 | 674.280158 | 25323176794  |
| 264 | 674.328499 | 36033005711  |
| 265 | 675.730244 | 23564585967  |
| 266 | 698.940997 | 23557995899  |
| 267 | 699.436291 | 25389366740  |
| 268 | 701.482715 | 22982164105  |
| 269 | 704.901406 | 22881829862  |
| 270 | 710.740435 | 23463416095  |
| 271 | 727.204241 | 24309522437  |
| 272 | 728.421216 | 22961739442  |
| 273 | 773.047098 | 24272637729  |
| 274 | 778.063458 | 22665608210  |
| 275 | 798.426342 | 22574840968  |
| 276 | 826.750832 | 23373796530  |

---

## Mass Spectrum List Report

---

| #   | m/z        | I           |
|-----|------------|-------------|
| 277 | 833.588311 | 25685675174 |
| 278 | 834.519488 | 22853924844 |
| 279 | 860.514501 | 22951530967 |
| 280 | 994.203915 | 24403461105 |

AH-3-42 Characterization

```

NAME      AH-3-42
EXPNO     60
PROCNO    1
Date_     20171110
Time      22.56 h
INSTRUM   spect
PROBHD    z108618_0161 (
PULPROG   zg30
TD        65536
SOLVENT   CDC13
NS        32
DS        2
SWH       8012.820 Hz
FIDRES    0.244532 Hz
AQ        4.0894966 sec
RG        203
DW        62.400 usec
DE        6.50 usec
TE        298.2 K
D1        1.00000000 sec
TDO       1
SFO1      400.1724710 MHz
NUC1      1H
P1        9.88 usec
SI        65536
SF        400.1700081 MHz
WDW       EM
SSB       0
LB        0.30 Hz
GB        0
PC        1.00
    
```

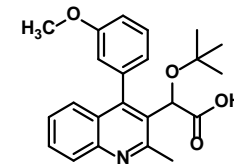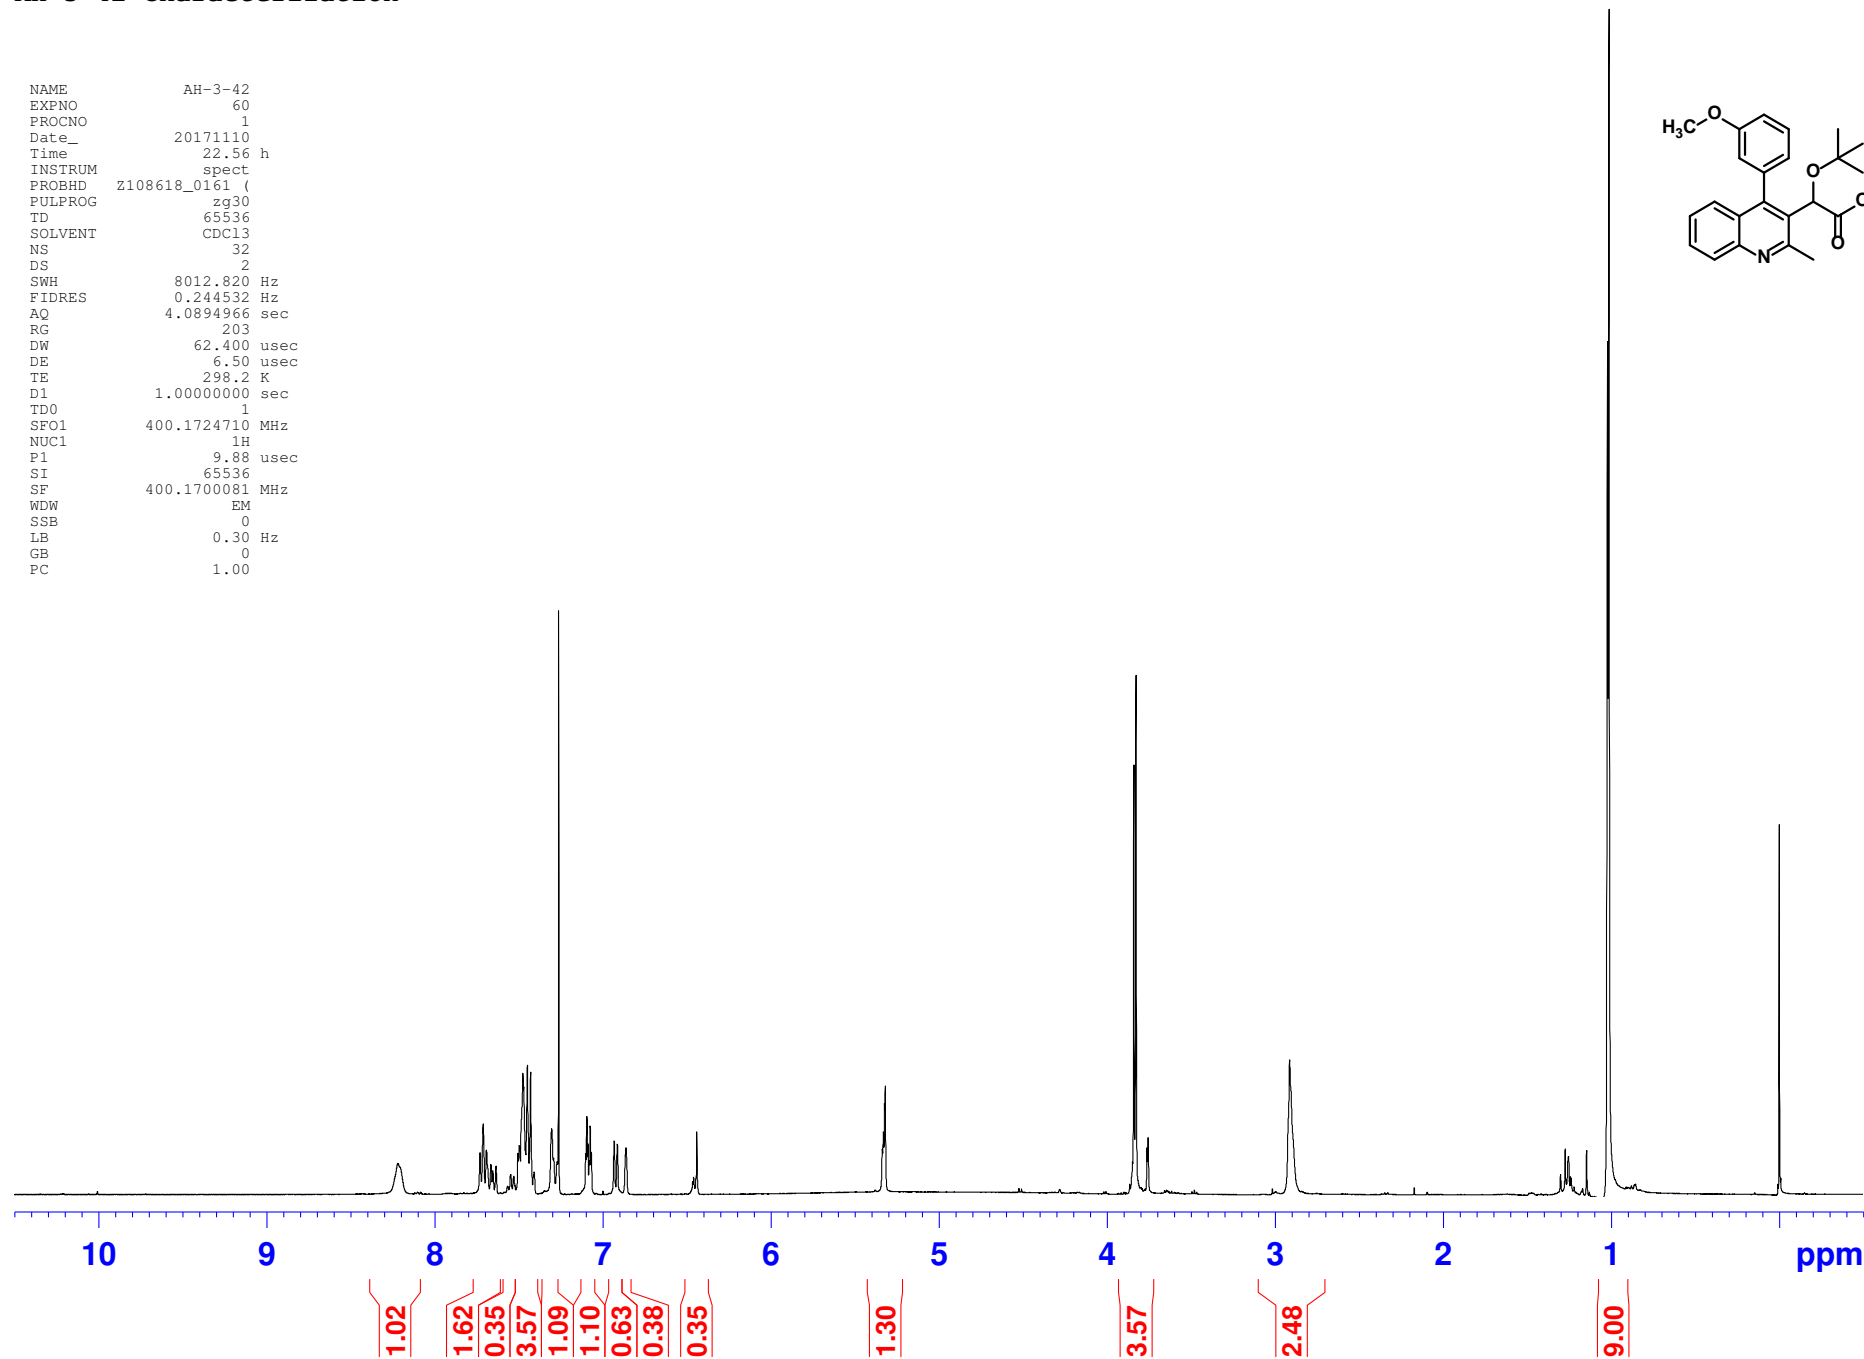

AH-3-42 Characterization

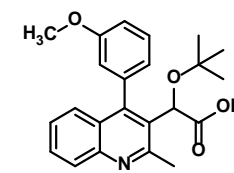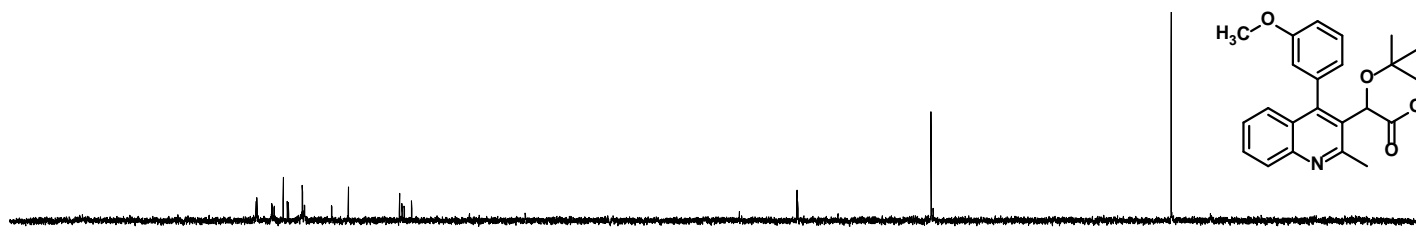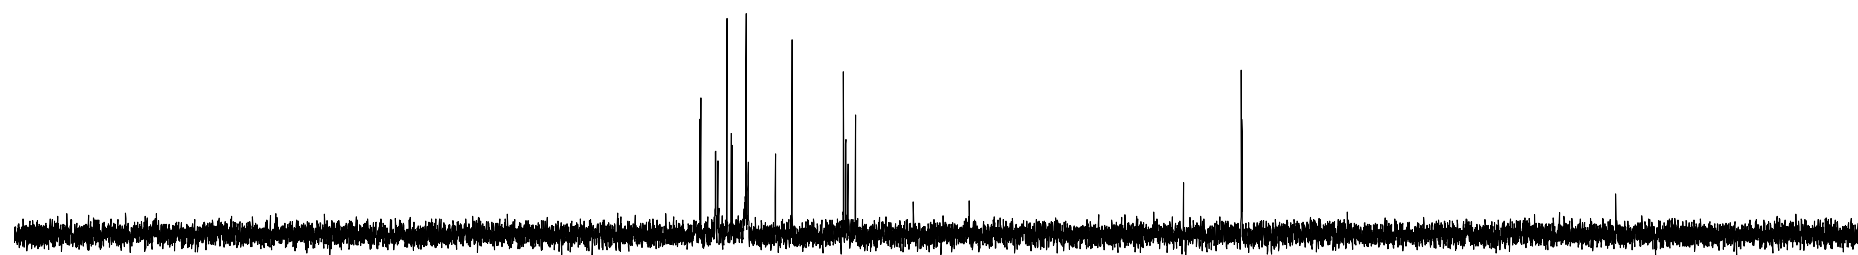

- 172.35
- 159.82
- 159.04
- 136.52
- 136.45
- 132.18
- 132.08
- 130.37
- 130.13
- 130.02
- 129.09
- 128.62
- 128.50
- 126.93
- 126.68
- 126.15
- 123.59
- 121.69
- 115.86
- 115.60
- 115.34
- 114.49
- 77.23
- 70.68
- 70.59
- 55.43
- 28.13

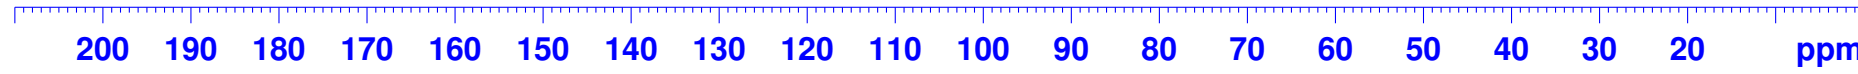

# AH-3-62 Characterization

NAME AH-3-62  
EXPNO 40  
PROCNO 1  
Date\_ 20171220  
Time 19.01 h  
INSTRUM spect  
PROBHD z108618\_0161 (  
PULPROG zg30  
TD 65536  
SOLVENT CDC13  
NS 16  
DS 2  
SWH 8012.820 Hz  
FIDRES 0.244532 Hz  
AQ 4.0894966 sec  
RG 144  
DW 62.400 usec  
DE 6.50 usec  
TE 298.2 K  
D1 1.00000000 sec  
TDO 1  
SFO1 400.1724710 MHz  
NUC1 1H  
P1 9.88 usec  
SI 65536  
SF 400.1700084 MHz  
WDW EM  
SSB 0  
LB 0.30 Hz  
GB 0  
PC 1.00

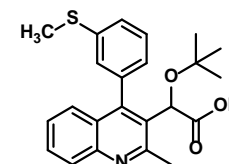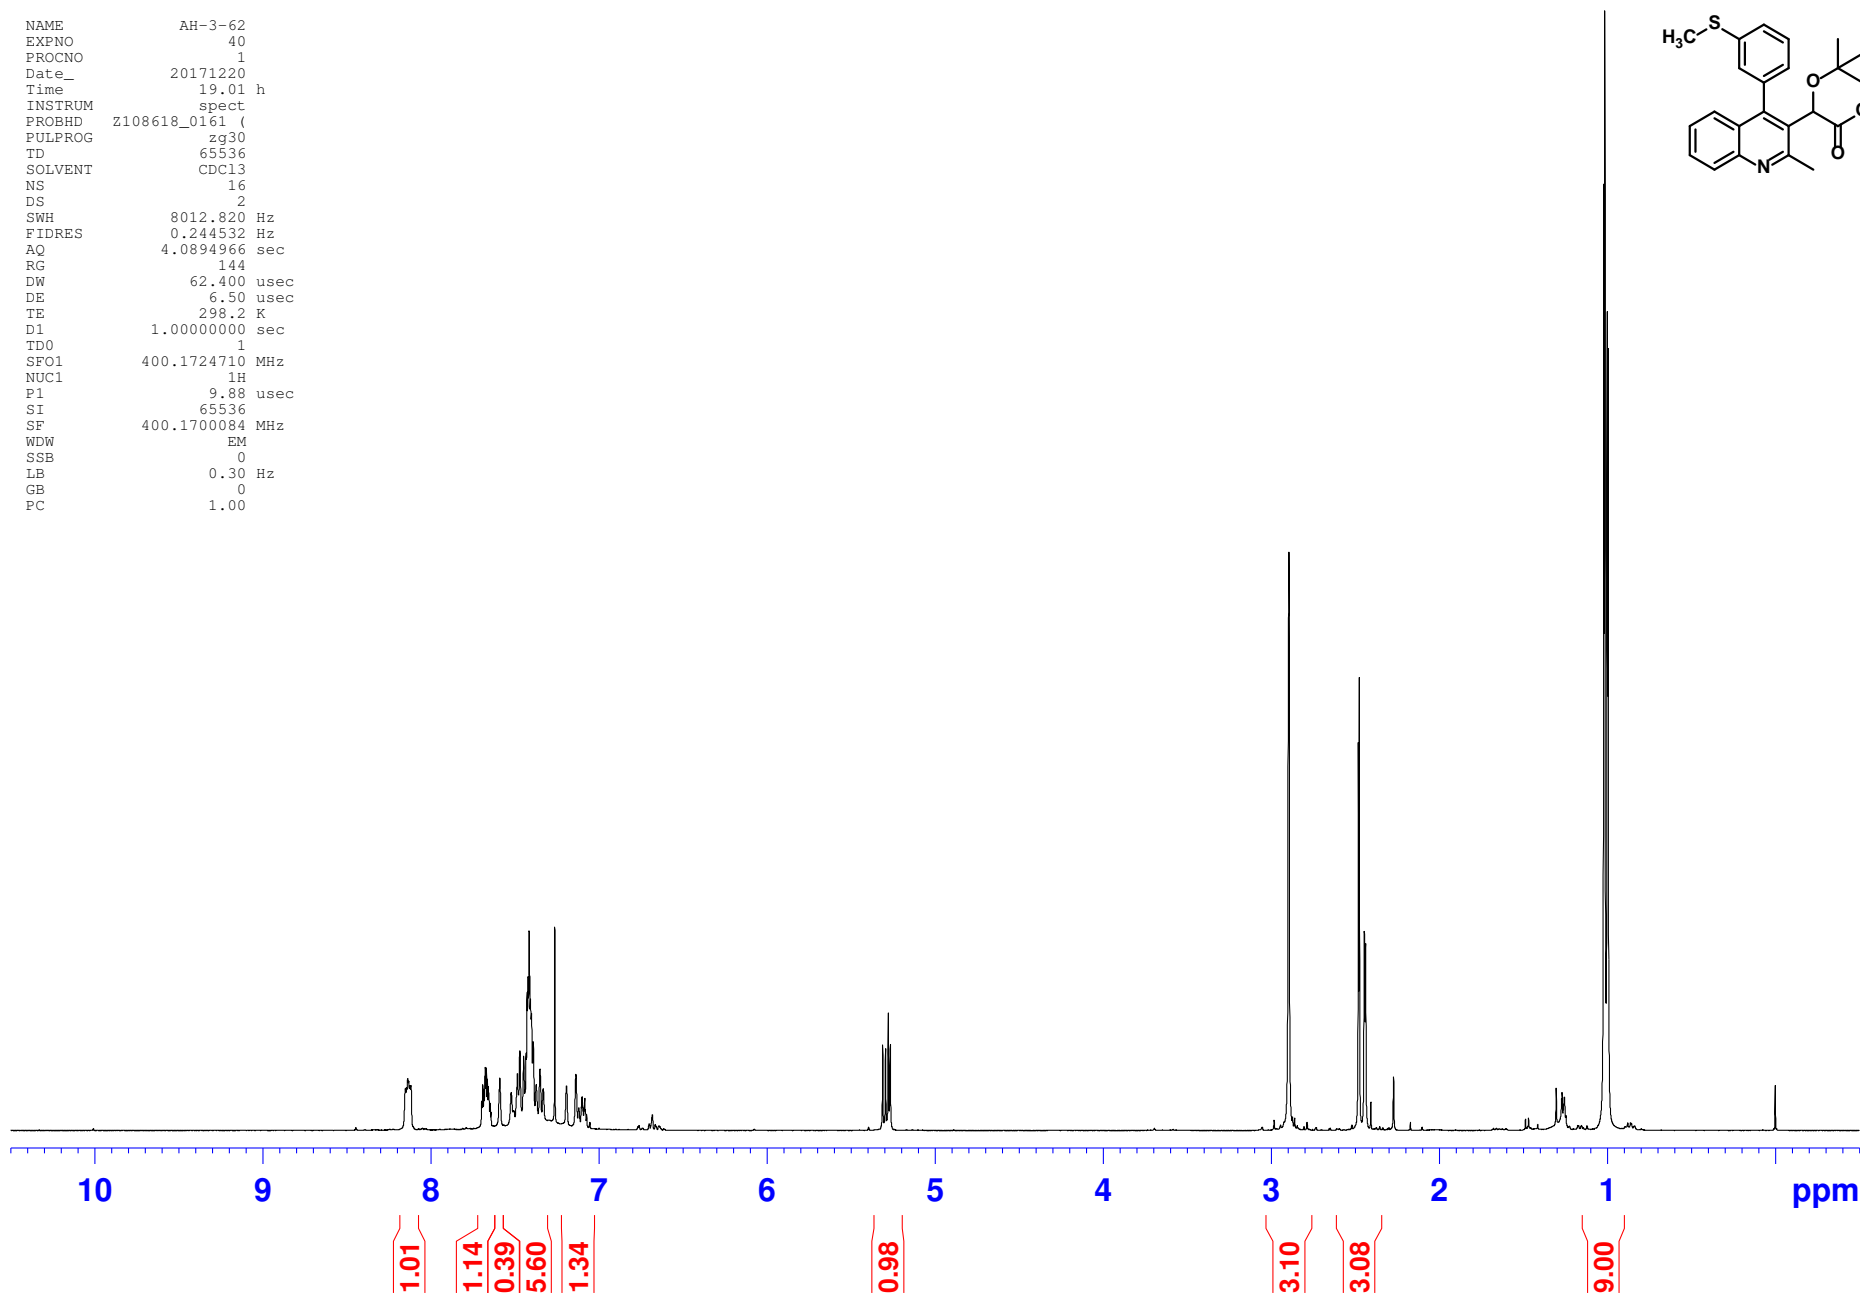

# AH-3-62 Characterization

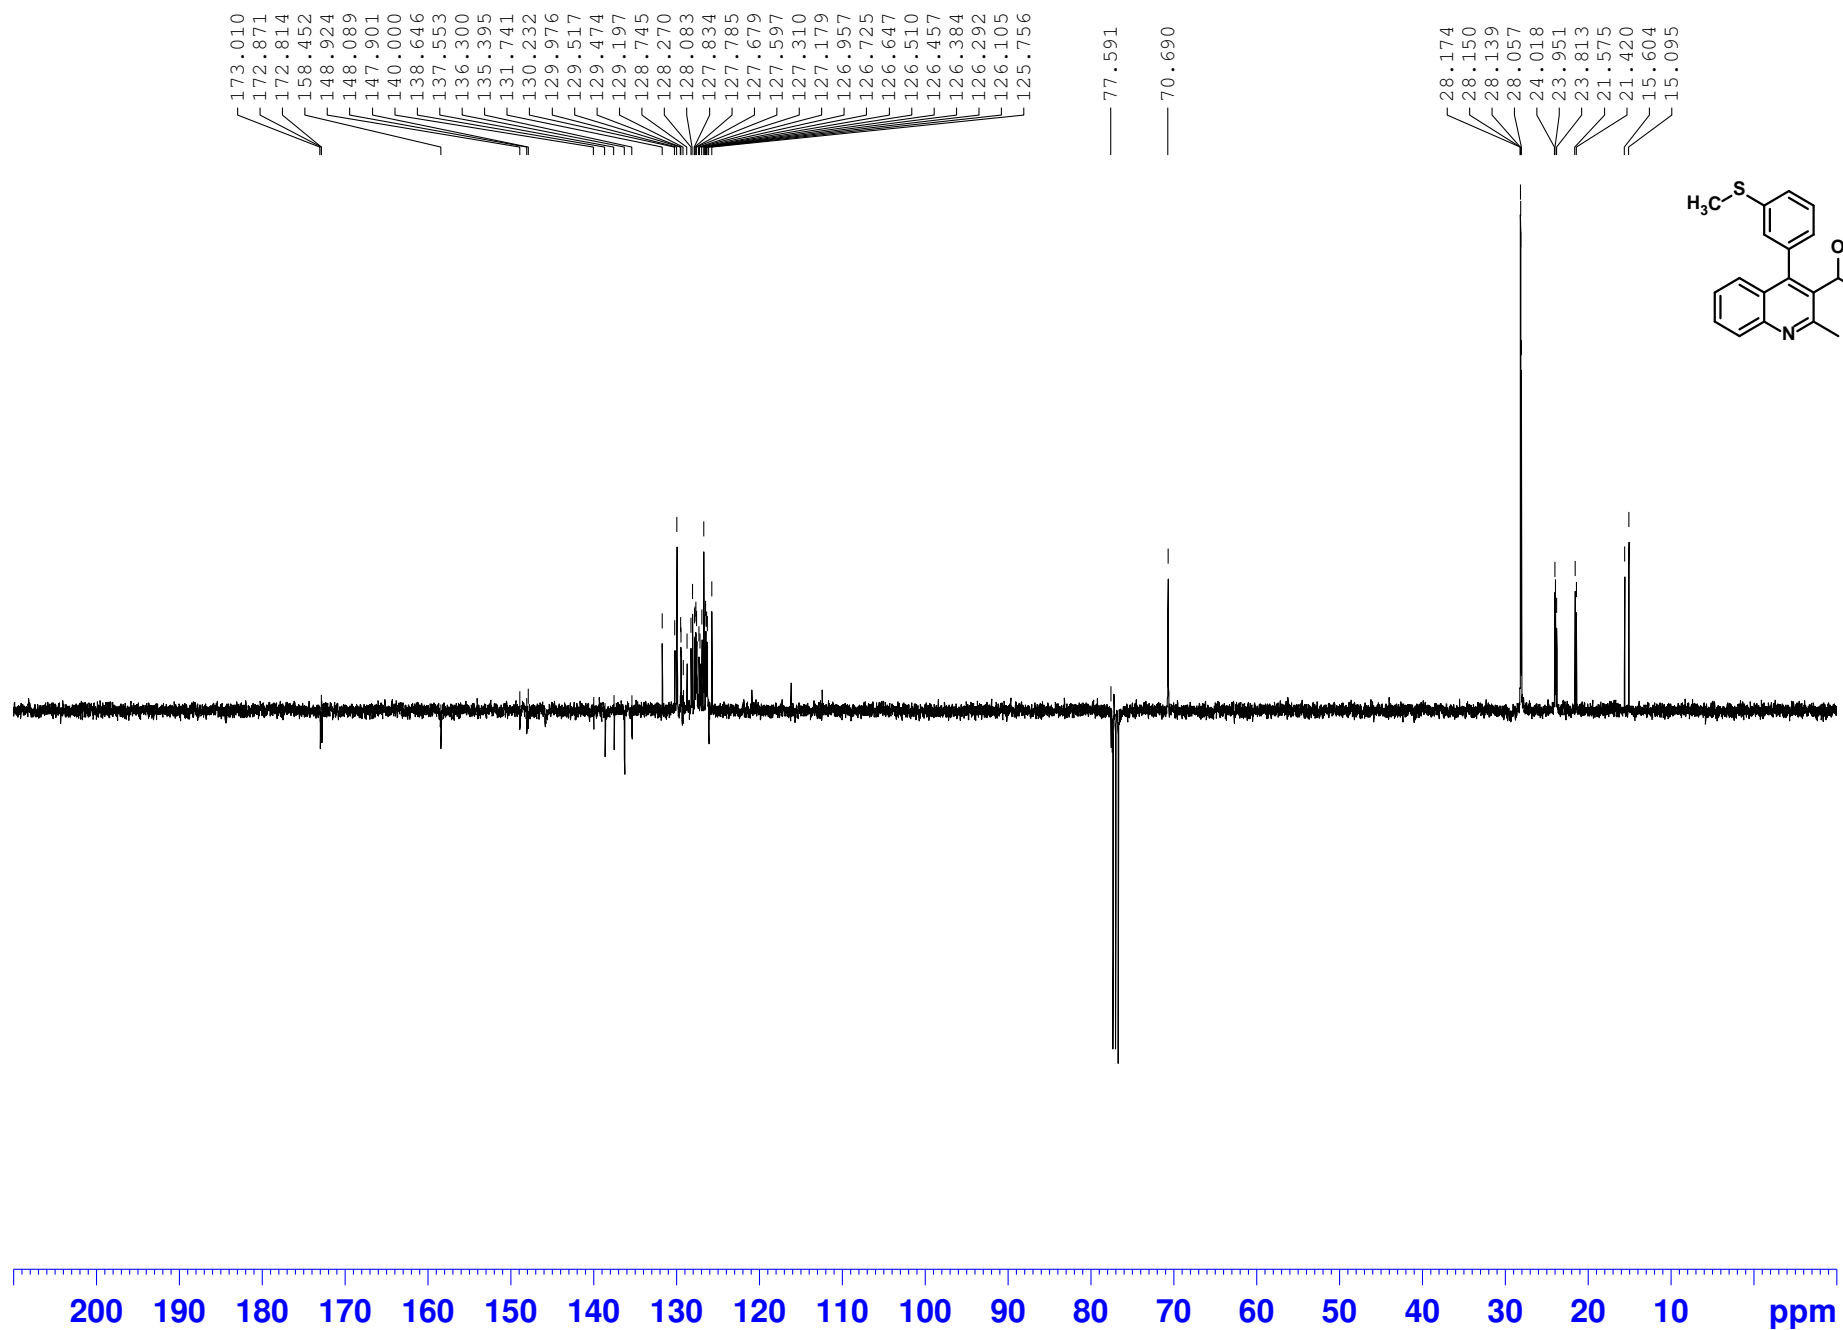



# Mass Spectrum List Report

## Analysis Info

Analysis Name F:\MS1-091514 - 080917\Data\apexdata031918\AH-3-62\_pos\_000001.d  
Method  
Sample Name AH-3-62  
Comment AH-3-62 in THF:MeOH C23H25NO3S H+

Acquisition Date 3/19/2018 10:05:39 AM  
Operator FTMS\_USER  
Instrument apex-Qe

Sample Name AH-3-62 in THF:MeOH  
Exact Mass of C23H25NO3S H+ = 396.162791 m/z  
Mass Observed = 396.163160 m/z

Difference < 1.0 ppm

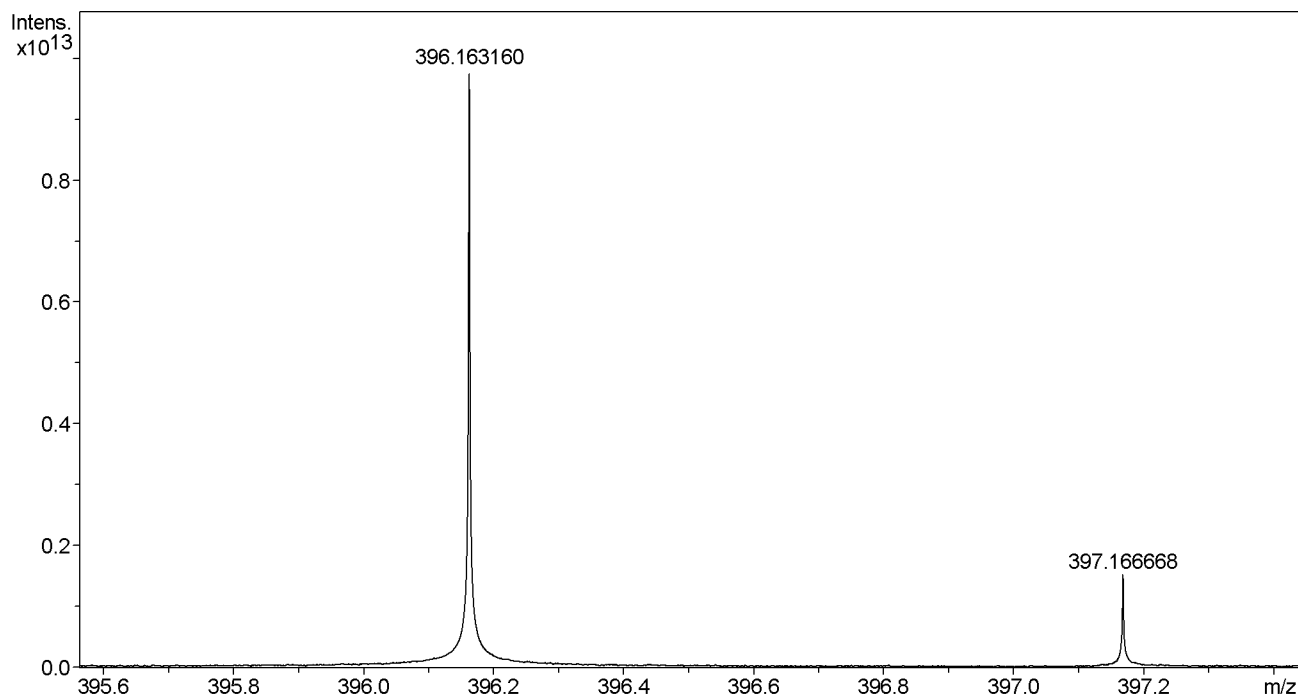

| #  | m/z        | I           |
|----|------------|-------------|
| 1  | 185.843550 | 22403615856 |
| 2  | 186.030937 | 36260878547 |
| 3  | 186.554598 | 63714776266 |
| 4  | 187.958183 | 22043541232 |
| 5  | 188.001011 | 21388588655 |
| 6  | 188.720466 | 22640774754 |
| 7  | 189.455895 | 22088414249 |
| 8  | 189.873588 | 22888885067 |
| 9  | 190.193407 | 21840571523 |
| 10 | 192.145763 | 20959642258 |
| 11 | 193.312809 | 54521564719 |
| 12 | 194.050658 | 23455884941 |
| 13 | 195.206251 | 22127287894 |
| 14 | 196.645087 | 21258939202 |
| 15 | 197.999885 | 22135380859 |
| 16 | 198.084694 | 24348307216 |
| 17 | 199.750758 | 21007737635 |
| 18 | 201.512333 | 21547967800 |
| 19 | 202.340459 | 42299566455 |
| 20 | 202.593965 | 21043138152 |

---

# Mass Spectrum List Report

---

| #  | m/z        | I           |
|----|------------|-------------|
| 21 | 203.081141 | 21519134453 |
| 22 | 204.080826 | 21065863665 |
| 23 | 205.084282 | 22602736989 |
| 24 | 205.169144 | 21562360074 |
| 25 | 205.486354 | 24815081113 |
| 26 | 206.805223 | 20929868928 |
| 27 | 207.122694 | 21190025905 |
| 28 | 209.441733 | 59814311080 |
| 29 | 210.238752 | 21734825041 |
| 30 | 210.600164 | 23329030048 |
| 31 | 214.252293 | 23051256357 |
| 32 | 216.080973 | 28493892750 |
| 33 | 217.641879 | 21824519552 |
| 34 | 218.096317 | 39918139896 |
| 35 | 224.938084 | 21305837042 |
| 36 | 225.154269 | 21749280950 |
| 37 | 227.024572 | 21717257688 |
| 38 | 227.953540 | 21784325610 |
| 39 | 230.096418 | 27856425584 |
| 40 | 231.104429 | 63866835924 |
| 41 | 234.117784 | 22322977746 |
| 42 | 234.196346 | 23018753901 |
| 43 | 238.967557 | 22194879218 |
| 44 | 239.789335 | 22012350403 |
| 45 | 243.780880 | 21202364100 |
| 46 | 245.119694 | 46831445456 |
| 47 | 246.091349 | 29221836310 |
| 48 | 246.424636 | 25375070364 |
| 49 | 246.718275 | 21272693272 |
| 50 | 248.102589 | 21286375636 |
| 51 | 248.107038 | 32359085822 |
| 52 | 249.114791 | 23372135634 |
| 53 | 250.068712 | 23926054967 |
| 54 | 252.980799 | 26454370752 |
| 55 | 257.529838 | 22201099496 |
| 56 | 259.516350 | 21462362110 |
| 57 | 259.770127 | 21641139406 |
| 58 | 260.106994 | 23762477698 |
| 59 | 262.122501 | 42909949489 |
| 60 | 263.130665 | 24419412856 |
| 61 | 267.666115 | 22346824138 |
| 62 | 267.717550 | 23035915303 |
| 63 | 270.950074 | 23310164941 |
| 64 | 271.830353 | 26265732334 |
| 65 | 275.273283 | 21466033947 |
| 66 | 276.499696 | 27686665790 |
| 67 | 277.356226 | 23359035845 |
| 68 | 287.472778 | 22712560612 |
| 69 | 291.746096 | 24266055562 |
| 70 | 294.094568 | 60732125931 |
| 71 | 294.160419 | 22136397448 |
| 72 | 295.098276 | 27520326307 |
| 73 | 297.595649 | 21486511741 |
| 74 | 298.155431 | 22604311274 |
| 75 | 304.209566 | 22306438865 |
| 76 | 304.931322 | 68217180864 |
| 77 | 307.414982 | 27071536242 |
| 78 | 308.128055 | 66699533318 |
| 79 | 312.100037 | 35554881717 |
| 80 | 315.232140 | 22623205553 |
| 81 | 316.227593 | 34877394735 |
| 82 | 319.658304 | 25295396965 |
| 83 | 319.934868 | 25022219424 |
| 84 | 320.109307 | 32345940767 |

---

# Mass Spectrum List Report

---

| #   | m/z        | I              |
|-----|------------|----------------|
| 85  | 320.138473 | 28898438342    |
| 86  | 320.201300 | 2819355994281  |
| 87  | 320.262051 | 32671923007    |
| 88  | 320.282068 | 24991702256    |
| 89  | 320.308834 | 22911950580    |
| 90  | 320.340313 | 22344033948    |
| 91  | 321.204750 | 644515938061   |
| 92  | 326.731857 | 23143624074    |
| 93  | 332.072226 | 69508502943    |
| 94  | 340.099608 | 31752489840    |
| 95  | 341.103235 | 27961215670    |
| 96  | 342.377538 | 25516749583    |
| 97  | 351.886510 | 25701656662    |
| 98  | 351.960404 | 26544731058    |
| 99  | 352.173340 | 6181465784931  |
| 100 | 352.245867 | 56703705423    |
| 101 | 352.389344 | 27365053392    |
| 102 | 352.407762 | 24685514256    |
| 103 | 353.176886 | 1257822616189  |
| 104 | 354.169470 | 122297476784   |
| 105 | 354.180358 | 33867217870    |
| 106 | 355.173000 | 24939636653    |
| 107 | 360.067331 | 74427696115    |
| 108 | 362.471917 | 41577112973    |
| 109 | 362.529859 | 28179574103    |
| 110 | 362.748069 | 28879879138    |
| 111 | 362.855002 | 26415710382    |
| 112 | 362.897385 | 26742611584    |
| 113 | 362.986928 | 37384716939    |
| 114 | 363.050696 | 29707765240    |
| 115 | 363.108223 | 26795008637    |
| 116 | 363.133048 | 26751764695    |
| 117 | 363.155224 | 30237312956    |
| 118 | 363.182235 | 36133769872    |
| 119 | 363.196391 | 30141525858    |
| 120 | 363.233512 | 29837248418    |
| 121 | 363.250772 | 28585222038    |
| 122 | 363.280620 | 29395487967    |
| 123 | 363.304516 | 26513491763    |
| 124 | 363.319231 | 35545023721    |
| 125 | 363.377251 | 30551357385    |
| 126 | 363.415586 | 37818662760    |
| 127 | 363.429976 | 29384087602    |
| 128 | 363.441909 | 28802116605    |
| 129 | 363.481532 | 35667187118    |
| 130 | 363.519026 | 32421839305    |
| 131 | 363.615063 | 40502589110    |
| 132 | 363.646469 | 36145488979    |
| 133 | 363.718329 | 48112003960    |
| 134 | 363.731778 | 42351536031    |
| 135 | 363.840621 | 58846026370    |
| 136 | 363.886870 | 64953741294    |
| 137 | 363.965521 | 82504954448    |
| 138 | 364.191043 | 24777126998133 |
| 139 | 364.340508 | 111170771133   |
| 140 | 364.428329 | 69464847739    |
| 141 | 364.468268 | 57827086008    |
| 142 | 364.495616 | 56033107782    |
| 143 | 364.520034 | 54481686381    |
| 144 | 364.527792 | 52030658009    |
| 145 | 364.552306 | 55973645913    |
| 146 | 364.584841 | 44051174417    |
| 147 | 364.623616 | 38124839444    |
| 148 | 364.686771 | 37519441851    |

---

# Mass Spectrum List Report

---

| #   | m/z        | I             |
|-----|------------|---------------|
| 149 | 364.775981 | 27980140727   |
| 150 | 364.805253 | 28032858955   |
| 151 | 364.832281 | 25667910815   |
| 152 | 364.878958 | 26142086492   |
| 153 | 365.111339 | 37310838859   |
| 154 | 365.194423 | 5693264192023 |
| 155 | 365.272600 | 71908131116   |
| 156 | 365.369566 | 40289542331   |
| 157 | 365.386763 | 39811173227   |
| 158 | 365.405697 | 39346469061   |
| 159 | 365.449309 | 46850854078   |
| 160 | 365.483962 | 39428600737   |
| 161 | 365.559589 | 33839188754   |
| 162 | 365.605946 | 31824114523   |
| 163 | 365.628278 | 30392415063   |
| 164 | 365.644383 | 27859860545   |
| 165 | 365.675617 | 28608824009   |
| 166 | 365.712656 | 26420171190   |
| 167 | 365.777668 | 28246210792   |
| 168 | 365.812926 | 30289050725   |
| 169 | 365.832546 | 27057019566   |
| 170 | 365.920879 | 33162483391   |
| 171 | 365.982975 | 25081177979   |
| 172 | 366.198186 | 253739087209  |
| 173 | 366.581517 | 24963306992   |
| 174 | 367.005012 | 26152789551   |
| 175 | 368.168497 | 753813136134  |
| 176 | 368.224075 | 28971016560   |
| 177 | 369.172045 | 71854493161   |
| 178 | 379.181422 | 65995222259   |
| 179 | 382.463683 | 383012316258  |
| 180 | 382.469288 | 62460969021   |
| 181 | 386.173307 | 819400666103  |
| 182 | 386.214770 | 29700327204   |
| 183 | 387.176796 | 123706378329  |
| 184 | 390.150648 | 156493018479  |
| 185 | 391.154106 | 32081837066   |
| 186 | 394.941084 | 25062464449   |
| 187 | 395.516733 | 27726500389   |
| 188 | 395.627900 | 24611192500   |
| 189 | 395.653762 | 25605444571   |
| 190 | 395.678110 | 30415248623   |
| 191 | 395.714241 | 298666565729  |
| 192 | 395.820195 | 33350695667   |
| 193 | 395.840209 | 32877458634   |
| 194 | 395.891337 | 37475863797   |
| 195 | 395.969059 | 51563266679   |
| 196 | 396.026606 | 57343988026   |
| 197 | 396.163160 | 9812343688296 |
| 198 | 396.299365 | 60259900608   |
| 199 | 396.380200 | 39288294596   |
| 200 | 396.437683 | 41023856137   |
| 201 | 396.508993 | 29687408314   |
| 202 | 396.541071 | 34858166902   |
| 203 | 396.749983 | 24188676010   |
| 204 | 396.807198 | 24582061227   |
| 205 | 397.166668 | 1521546567360 |
| 206 | 397.224434 | 38522850947   |
| 207 | 397.310657 | 25466447042   |
| 208 | 397.346758 | 26177193638   |
| 209 | 398.159449 | 122040907708  |
| 210 | 398.167597 | 31531743583   |
| 211 | 398.170604 | 59157419900   |
| 212 | 398.241998 | 64775303167   |

---

# Mass Spectrum List Report

---

| #   | m/z        | I             |
|-----|------------|---------------|
| 213 | 399.163071 | 30226991154   |
| 214 | 408.155474 | 86453027265   |
| 215 | 412.158583 | 250673544532  |
| 216 | 413.162083 | 31820781745   |
| 217 | 418.061098 | 25917870633   |
| 218 | 418.145625 | 120197718007  |
| 219 | 419.149011 | 31718875892   |
| 220 | 421.474584 | 23378425186   |
| 221 | 422.521750 | 23902284527   |
| 222 | 433.167968 | 22826684690   |
| 223 | 434.010729 | 24017387145   |
| 224 | 434.087736 | 30062222561   |
| 225 | 434.140467 | 1026357557195 |
| 226 | 434.193863 | 32766539557   |
| 227 | 435.143992 | 150908573105  |
| 228 | 440.127693 | 79328579115   |
| 229 | 441.130409 | 25891731287   |
| 230 | 449.457395 | 22098718388   |
| 231 | 451.619976 | 23217920934   |
| 232 | 453.407707 | 28284249012   |
| 233 | 456.122666 | 164815957776  |
| 234 | 457.126082 | 29462745355   |
| 235 | 479.439874 | 21924777303   |
| 236 | 479.711218 | 23715721397   |
| 237 | 493.146673 | 22819456270   |
| 238 | 498.172744 | 22667427829   |
| 239 | 508.582889 | 104442810112  |
| 240 | 509.585948 | 33938258019   |
| 241 | 512.883274 | 22826977557   |
| 242 | 513.696638 | 22468501680   |
| 243 | 521.546221 | 24985676761   |
| 244 | 532.781832 | 23196747271   |
| 245 | 536.614171 | 500337961583  |
| 246 | 537.268173 | 60987328828   |
| 247 | 537.617626 | 113826377778  |
| 248 | 538.620846 | 27779003917   |
| 249 | 541.853404 | 22619281650   |
| 250 | 552.609431 | 24759614222   |
| 251 | 564.645625 | 100340919552  |
| 252 | 565.121841 | 23840990036   |
| 253 | 565.648803 | 39327353135   |
| 254 | 567.360665 | 22322971043   |
| 255 | 568.368879 | 22239762969   |
| 256 | 569.404172 | 23890971683   |
| 257 | 572.809741 | 22642366306   |
| 258 | 581.258113 | 35967012904   |
| 259 | 583.273760 | 29230273460   |
| 260 | 583.788985 | 23351551307   |
| 261 | 587.510170 | 23801316937   |
| 262 | 592.677148 | 134089437561  |
| 263 | 592.705543 | 24889747902   |
| 264 | 593.680402 | 50516038295   |
| 265 | 608.051069 | 23219221910   |
| 266 | 628.154577 | 22618164560   |
| 267 | 643.202706 | 24009198371   |
| 268 | 657.456645 | 24136701668   |
| 269 | 685.438211 | 25851636742   |
| 270 | 707.918582 | 24715394207   |
| 271 | 716.264265 | 26238341351   |
| 272 | 741.069595 | 23627864027   |
| 273 | 746.726960 | 26519199382   |
| 274 | 746.757549 | 22984016372   |
| 275 | 771.860760 | 23138437209   |
| 276 | 777.134719 | 23359618958   |

---

# Mass Spectrum List Report

---

| #   | m/z        | I           |
|-----|------------|-------------|
| 277 | 801.093755 | 23136634610 |
| 278 | 837.044034 | 25221957861 |
| 279 | 849.280141 | 25003640961 |
| 280 | 866.242147 | 22632262106 |
| 281 | 868.618166 | 24904662726 |
| 282 | 895.803363 | 24696973487 |
| 283 | 943.110906 | 24110205972 |
| 284 | 968.066334 | 23894135413 |

# AH-3-47 Characterization

NAME AH-3-48  
EXPNO 60  
PROCNO 1  
Date\_ 20171212  
Time\_ 10.09 h  
INSTRUM spect  
PROBHD Z108618\_0161 (  
PULPROG zg30  
TD 65536  
SOLVENT CD3OD\_SPE  
NS 16  
DS 2  
SWH 8012.820 Hz  
FIDRES 0.244532 Hz  
AQ 4.0894966 sec  
RG 203  
DW 62.400 usec  
DE 6.50 usec  
TE 298.2 K  
D1 1.00000000 sec  
TD0 1  
SFO1 400.1724710 MHz  
NUC1 1H  
P1 9.88 usec  
SI 65536  
SF 400.1700116 MHz  
WDW EM  
SSB 0  
LB 0.30 Hz  
GB 0  
PC 1.00

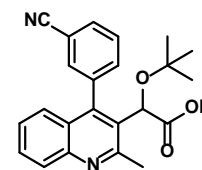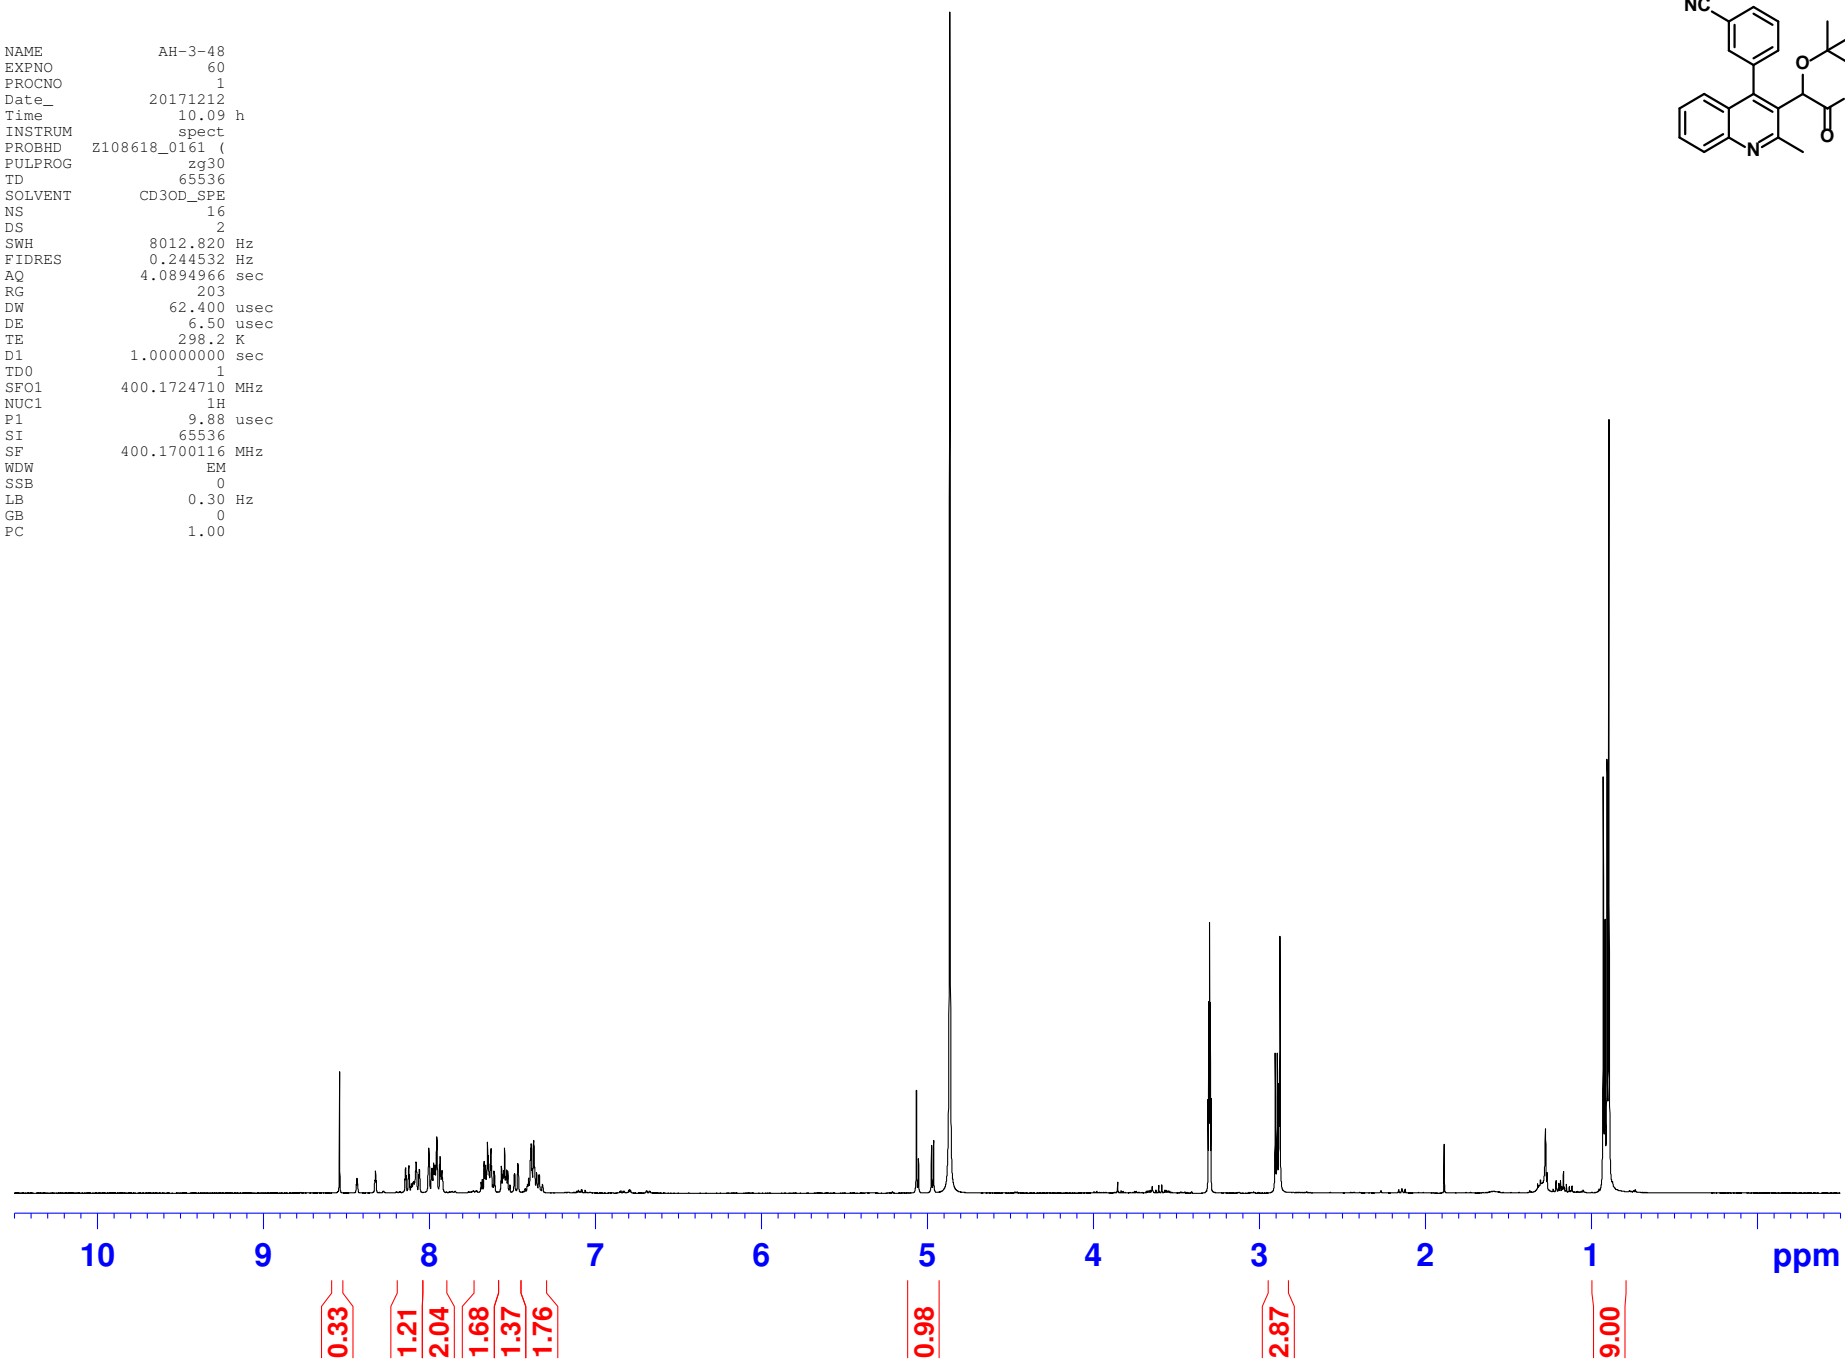

# AH-3-47 Characterization

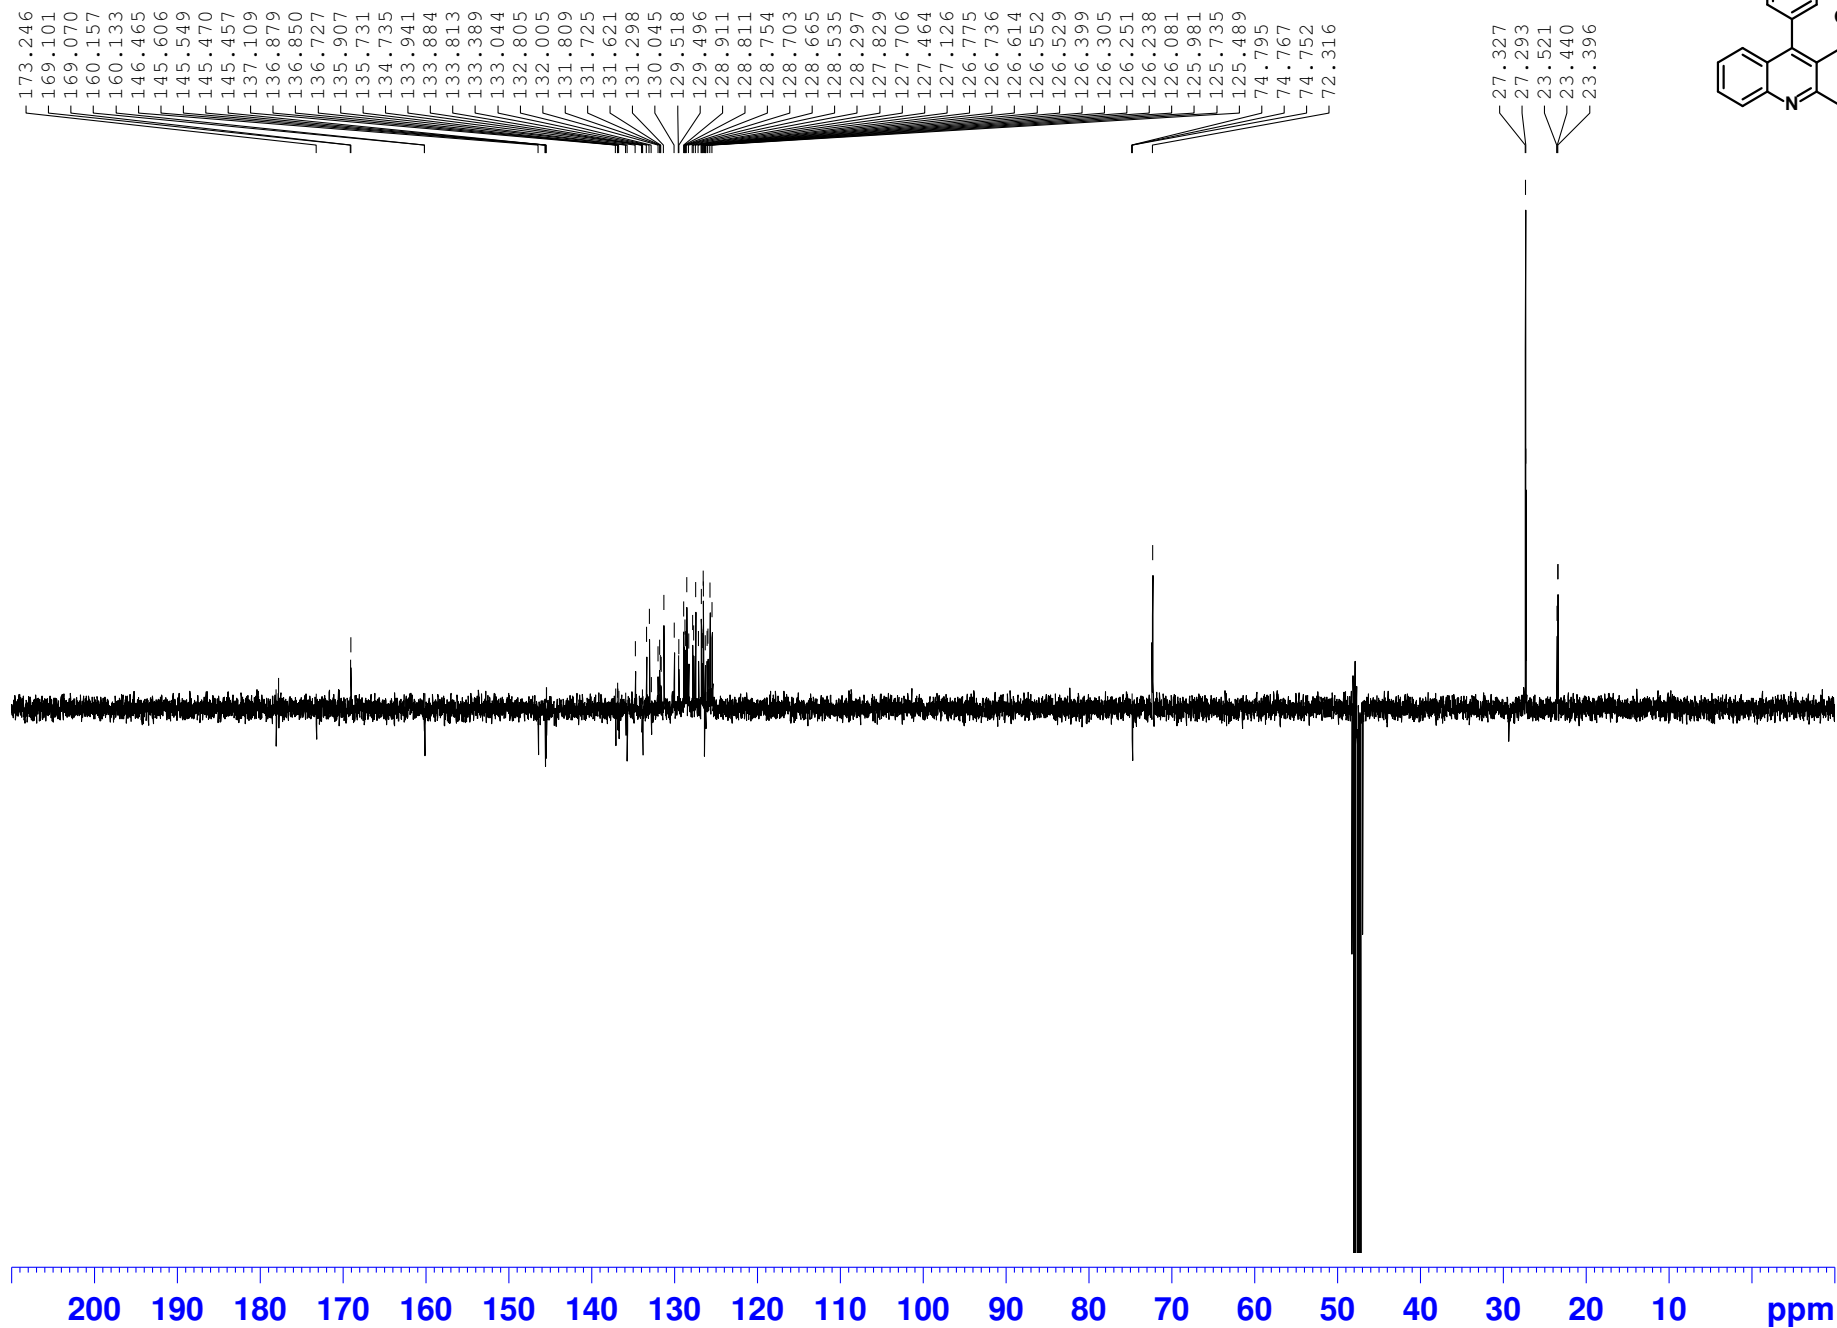



# Mass Spectrum List Report

## Analysis Info

Analysis Name F:\MS1-091514 - 080917\Data\apexdata031918\AH-3-47\_pos\_000003.d  
Method  
Sample Name AH-3-47  
Comment AH-3-47 in THF:MeOH C23H22N2O3.H2O Na+

Acquisition Date 3/19/2018 4:52:40 PM  
Operator FTMS\_USER  
Instrument apex-Qe

Sample Name AH-3-47 in THF:MeOH  
Exact Mass of C23H22N2O3.H2O Na+= 415.162828 m/z  
Mass Observed = 415.163184 m/z  
Difference < 1.0 ppm

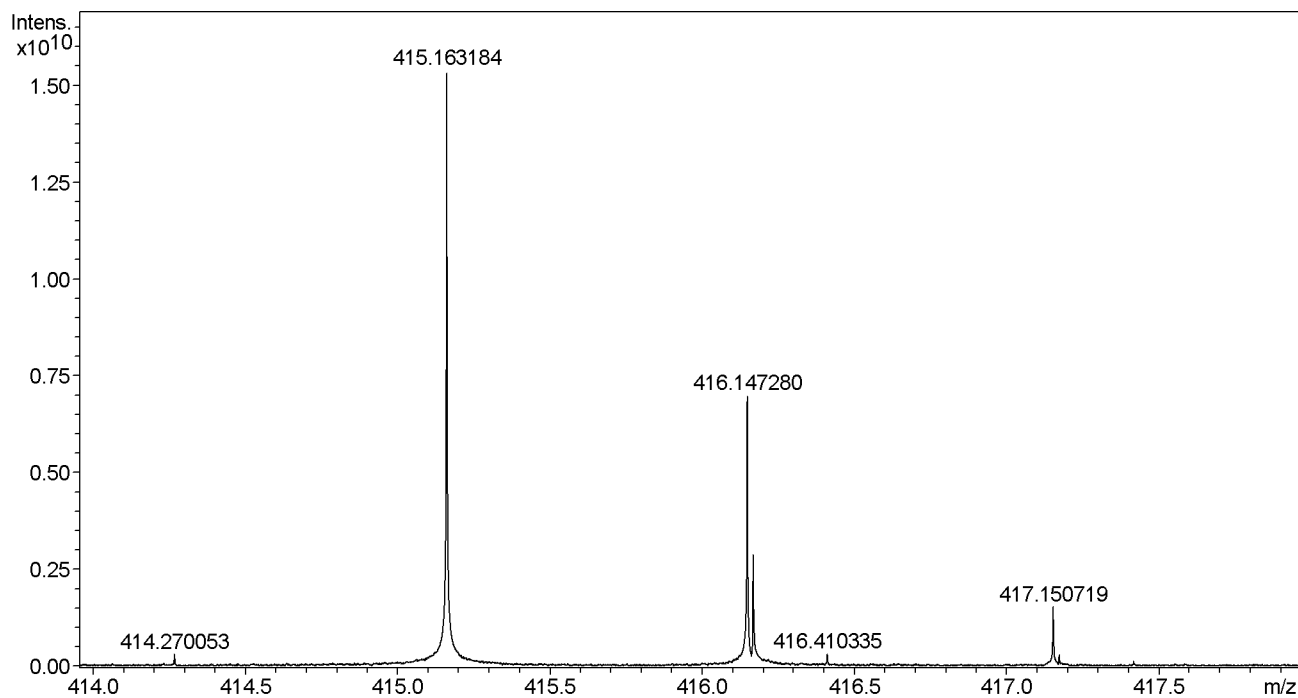

| #  | m/z        | I          |
|----|------------|------------|
| 1  | 189.685652 | 432859212  |
| 2  | 190.061850 | 1144490704 |
| 3  | 201.412870 | 102817951  |
| 4  | 201.885187 | 321514768  |
| 5  | 209.144336 | 236171421  |
| 6  | 209.686029 | 994414455  |
| 7  | 215.089252 | 334112004  |
| 8  | 216.092269 | 103680918  |
| 9  | 219.051533 | 102584090  |
| 10 | 231.120532 | 247736272  |
| 11 | 245.099828 | 153398078  |
| 12 | 246.592565 | 104369466  |
| 13 | 249.702339 | 297522670  |
| 14 | 250.667120 | 351729114  |
| 15 | 268.312283 | 96459033   |
| 16 | 269.136281 | 140863290  |
| 17 | 273.047954 | 132401583  |
| 18 | 274.493234 | 221778696  |
| 19 | 275.786834 | 499946697  |
| 20 | 283.115515 | 94095977   |

---

# Mass Spectrum List Report

---

| #  | m/z        | I           |
|----|------------|-------------|
| 21 | 285.131160 | 118158165   |
| 22 | 298.347182 | 107186994   |
| 23 | 301.075591 | 3489383241  |
| 24 | 301.162426 | 99861758    |
| 25 | 301.299942 | 183699377   |
| 26 | 302.078986 | 662542010   |
| 27 | 303.141787 | 231910033   |
| 28 | 314.342165 | 105814830   |
| 29 | 317.121045 | 121867783   |
| 30 | 322.199229 | 107041057   |
| 31 | 324.214889 | 91129227    |
| 32 | 325.123778 | 326400705   |
| 33 | 334.191427 | 99127729    |
| 34 | 334.308350 | 99117310    |
| 35 | 335.200777 | 142611394   |
| 36 | 341.090052 | 110109287   |
| 37 | 349.183723 | 142814838   |
| 38 | 354.409806 | 454353955   |
| 39 | 355.413105 | 116414501   |
| 40 | 360.324109 | 1522843248  |
| 41 | 361.327457 | 330408448   |
| 42 | 362.303349 | 108588923   |
| 43 | 366.225513 | 119887010   |
| 44 | 368.425588 | 119437646   |
| 45 | 370.404764 | 247224521   |
| 46 | 374.303219 | 109453687   |
| 47 | 375.199361 | 119926449   |
| 48 | 376.319030 | 179184634   |
| 49 | 384.384013 | 337851655   |
| 50 | 385.387483 | 112221857   |
| 51 | 390.371208 | 199314539   |
| 52 | 393.181371 | 692430665   |
| 53 | 393.210070 | 202455865   |
| 54 | 393.298025 | 197310275   |
| 55 | 394.165358 | 1057353292  |
| 56 | 394.184668 | 190705909   |
| 57 | 395.168725 | 194599158   |
| 58 | 396.456870 | 116948003   |
| 59 | 398.241850 | 7038281205  |
| 60 | 399.245275 | 1298543314  |
| 61 | 400.248719 | 128016334   |
| 62 | 401.077579 | 315675709   |
| 63 | 401.184031 | 138691364   |
| 64 | 408.308893 | 146426626   |
| 65 | 409.220044 | 99075265    |
| 66 | 411.199888 | 96860317    |
| 67 | 413.266772 | 1255841708  |
| 68 | 414.270053 | 296901605   |
| 69 | 415.163184 | 15380416608 |
| 70 | 416.147280 | 6984498557  |
| 71 | 416.166724 | 2873753538  |
| 72 | 416.410335 | 317635674   |
| 73 | 417.150719 | 1532588563  |
| 74 | 417.170115 | 283079756   |
| 75 | 417.413905 | 127795240   |
| 76 | 418.154227 | 120826802   |
| 77 | 421.329307 | 108361045   |
| 78 | 424.488320 | 171049027   |
| 79 | 425.287940 | 1466344812  |
| 80 | 426.291230 | 318650425   |
| 81 | 427.105118 | 197105674   |
| 82 | 432.197895 | 192052925   |
| 83 | 433.181866 | 396537803   |
| 84 | 434.185307 | 97455492    |

---

# Mass Spectrum List Report

---

| #   | m/z        | I           |
|-----|------------|-------------|
| 85  | 435.345024 | 1771834648  |
| 86  | 436.348333 | 365711851   |
| 87  | 437.145195 | 11734961261 |
| 88  | 437.236706 | 299233105   |
| 89  | 438.129237 | 9269504492  |
| 90  | 438.148609 | 2148231800  |
| 91  | 439.132680 | 1788052602  |
| 92  | 439.151590 | 263595250   |
| 93  | 440.135829 | 205855649   |
| 94  | 440.446802 | 437789221   |
| 95  | 441.298188 | 114909806   |
| 96  | 441.450200 | 121099546   |
| 97  | 449.376060 | 173346392   |
| 98  | 452.175598 | 114746596   |
| 99  | 452.519572 | 496411389   |
| 100 | 453.522870 | 160140457   |
| 101 | 455.163928 | 179613740   |
| 102 | 456.140051 | 123865021   |
| 103 | 459.036170 | 152697853   |
| 104 | 459.170129 | 657992358   |
| 105 | 460.111301 | 2069602616  |
| 106 | 460.173485 | 186744985   |
| 107 | 461.114690 | 422811451   |
| 108 | 461.185847 | 1000117895  |
| 109 | 462.189213 | 245214408   |
| 110 | 466.535307 | 127527244   |
| 111 | 471.226099 | 231004893   |
| 112 | 472.473033 | 407248197   |
| 113 | 473.476561 | 103821706   |
| 114 | 475.165031 | 168496615   |
| 115 | 477.180721 | 3376252448  |
| 116 | 478.184120 | 781620840   |
| 117 | 479.187512 | 114379195   |
| 118 | 480.091499 | 110734815   |
| 119 | 480.270307 | 267625002   |
| 120 | 480.550879 | 1253230881  |
| 121 | 481.262636 | 222903300   |
| 122 | 481.554289 | 401171521   |
| 123 | 491.160083 | 501538767   |
| 124 | 491.196451 | 640852496   |
| 125 | 492.199982 | 157590044   |
| 126 | 493.175424 | 30362575653 |
| 127 | 494.178949 | 7429974230  |
| 128 | 494.566607 | 279970936   |
| 129 | 495.104140 | 425356138   |
| 130 | 495.182625 | 702361902   |
| 131 | 495.300645 | 189716955   |
| 132 | 496.107619 | 106407454   |
| 133 | 496.165399 | 174422658   |
| 134 | 496.545938 | 141899659   |
| 135 | 497.101105 | 127951489   |
| 136 | 497.360792 | 188888795   |
| 137 | 501.200245 | 131880156   |
| 138 | 506.566717 | 111218213   |
| 139 | 508.302033 | 114533652   |
| 140 | 508.582145 | 10657022043 |
| 141 | 509.207128 | 319307135   |
| 142 | 509.585573 | 3357778599  |
| 143 | 510.210262 | 113983584   |
| 144 | 510.588972 | 533186036   |
| 145 | 513.355760 | 224009132   |
| 146 | 518.070021 | 183983283   |
| 147 | 522.561516 | 147244800   |
| 148 | 522.597959 | 458492600   |

---

# Mass Spectrum List Report

---

| #   | m/z        | I           |
|-----|------------|-------------|
| 149 | 523.186511 | 325715513   |
| 150 | 523.601271 | 168611846   |
| 151 | 524.577178 | 710775284   |
| 152 | 525.288854 | 141297920   |
| 153 | 525.377052 | 174678460   |
| 154 | 525.580557 | 236287476   |
| 155 | 527.107193 | 234908776   |
| 156 | 529.350852 | 111871258   |
| 157 | 534.597876 | 272270532   |
| 158 | 536.613369 | 34790699107 |
| 159 | 537.336126 | 176696300   |
| 160 | 537.395565 | 236032188   |
| 161 | 537.616809 | 13573309109 |
| 162 | 538.620329 | 1918866147  |
| 163 | 539.623879 | 206971065   |
| 164 | 550.593012 | 423529111   |
| 165 | 550.629263 | 375999555   |
| 166 | 551.596396 | 183359386   |
| 167 | 551.632655 | 129399083   |
| 168 | 552.608515 | 1849287099  |
| 169 | 553.390720 | 115650564   |
| 170 | 553.611932 | 657000501   |
| 171 | 554.615145 | 133307213   |
| 172 | 558.142124 | 228371164   |
| 173 | 561.159429 | 140961916   |
| 174 | 561.202014 | 181745889   |
| 175 | 563.174889 | 2578891609  |
| 176 | 564.158774 | 838484667   |
| 177 | 564.178072 | 596591278   |
| 178 | 564.397061 | 151241213   |
| 179 | 564.644779 | 11250483448 |
| 180 | 565.161858 | 228662787   |
| 181 | 565.181466 | 125484514   |
| 182 | 565.648277 | 3928275511  |
| 183 | 566.651583 | 671067960   |
| 184 | 568.603552 | 103239018   |
| 185 | 569.403187 | 296204983   |
| 186 | 574.590521 | 147290672   |
| 187 | 576.433759 | 222803664   |
| 188 | 577.154266 | 164776803   |
| 189 | 577.437164 | 109758881   |
| 190 | 578.624185 | 257665704   |
| 191 | 578.660466 | 222398495   |
| 192 | 579.162054 | 5943239811  |
| 193 | 580.123104 | 114240651   |
| 194 | 580.165521 | 1910135100  |
| 195 | 580.639923 | 541995994   |
| 196 | 581.168863 | 268323003   |
| 197 | 581.643106 | 228737236   |
| 198 | 585.065976 | 144133224   |
| 199 | 586.140844 | 1059334439  |
| 200 | 587.144330 | 273905556   |
| 201 | 590.660526 | 209902419   |
| 202 | 591.664174 | 111095556   |
| 203 | 592.252617 | 258521578   |
| 204 | 592.428461 | 659947528   |
| 205 | 592.676154 | 13709400900 |
| 206 | 593.432485 | 199821544   |
| 207 | 593.679573 | 5490885333  |
| 208 | 594.572255 | 107914863   |
| 209 | 594.682933 | 902767798   |
| 210 | 595.686679 | 136016137   |
| 211 | 599.136083 | 127322302   |
| 212 | 599.549190 | 1337482596  |

---

# Mass Spectrum List Report

---

| #   | m/z        | I          |
|-----|------------|------------|
| 213 | 600.552366 | 447636312  |
| 214 | 601.556027 | 125351269  |
| 215 | 605.366982 | 167696033  |
| 216 | 606.655622 | 369225748  |
| 217 | 606.692414 | 109004917  |
| 218 | 607.658888 | 153272631  |
| 219 | 608.247562 | 1075816170 |
| 220 | 608.671266 | 636767913  |
| 221 | 609.250793 | 347837807  |
| 222 | 609.674573 | 308264061  |
| 223 | 611.413579 | 100556157  |
| 224 | 613.250614 | 517424980  |
| 225 | 613.342124 | 114439135  |
| 226 | 613.429353 | 426795377  |
| 227 | 614.234524 | 946681371  |
| 228 | 614.254766 | 184046014  |
| 229 | 614.432861 | 116575160  |
| 230 | 614.536273 | 121452005  |
| 231 | 615.237994 | 282083460  |
| 232 | 620.707665 | 651485800  |
| 233 | 621.133667 | 355601050  |
| 234 | 621.711099 | 321410082  |
| 235 | 622.136984 | 115862871  |
| 236 | 622.650737 | 132371703  |
| 237 | 623.130954 | 125654050  |
| 238 | 632.496570 | 223096226  |
| 239 | 633.499608 | 105966282  |
| 240 | 634.201007 | 127507468  |
| 241 | 634.245101 | 109749566  |
| 242 | 636.216614 | 1009741232 |
| 243 | 637.220032 | 309289060  |
| 244 | 638.410755 | 183910739  |
| 245 | 642.630411 | 95530651   |
| 246 | 644.099654 | 145151713  |
| 247 | 648.491417 | 231993413  |
| 248 | 648.739152 | 366945456  |
| 249 | 649.494685 | 158844064  |
| 250 | 649.742394 | 172178211  |
| 251 | 655.440172 | 203490077  |
| 252 | 657.455813 | 579582430  |
| 253 | 658.459295 | 186740341  |
| 254 | 671.209142 | 169781942  |
| 255 | 676.328123 | 105609782  |
| 256 | 685.436523 | 2283427649 |
| 257 | 686.439930 | 946578043  |
| 258 | 687.401150 | 156199070  |
| 259 | 687.443367 | 223882138  |
| 260 | 688.404235 | 93036380   |
| 261 | 689.204265 | 504423911  |
| 262 | 690.207888 | 151947167  |
| 263 | 693.249601 | 171350560  |
| 264 | 694.175180 | 218589548  |
| 265 | 694.233805 | 103197771  |
| 266 | 699.466530 | 163727902  |
| 267 | 701.481890 | 431352616  |
| 268 | 702.485049 | 203903597  |
| 269 | 712.170253 | 186631995  |
| 270 | 713.431784 | 159649269  |
| 271 | 745.508173 | 190432607  |
| 272 | 786.669010 | 323597500  |
| 273 | 787.672206 | 171295235  |
| 274 | 808.322127 | 110873316  |
| 275 | 814.700282 | 728805358  |
| 276 | 815.703622 | 405533815  |

---

## Mass Spectrum List Report

---

| #   | m/z        | I         |
|-----|------------|-----------|
| 277 | 816.707026 | 127022949 |
| 278 | 829.319572 | 99069990  |
| 279 | 830.303976 | 210508344 |
| 280 | 831.288246 | 149561932 |
| 281 | 842.731711 | 180493193 |
| 282 | 843.734856 | 102647983 |
| 283 | 852.285412 | 161739127 |
| 284 | 853.269781 | 117786136 |
| 285 | 861.541738 | 324909586 |
| 286 | 862.545227 | 152572828 |
| 287 | 870.763657 | 184625777 |
| 288 | 871.766454 | 111143650 |
| 289 | 877.537055 | 926128546 |
| 290 | 878.540429 | 475451091 |
| 291 | 893.567605 | 111436618 |

AH-3-73 CDCl3 layer

MISSISS

NAME AH-3-73  
EXPNO 10  
PROCNO 1  
Date\_ 20180201  
Time 10.10 h  
INSTRUM spect  
PROBHD z108618\_0161 (  
PULPROG zg30  
TD 65536  
SOLVENT CDCl3  
NS 16  
DS 2  
SWH 8012.820 Hz  
FIDRES 0.244532 Hz  
AQ 4.0894966 sec  
RG 101  
DW 62.400 usec  
DE 6.50 usec  
TE 298.3 K  
D1 1.00000000 sec  
TDO 1  
SFO1 400.1724710 MHz  
NUC1 1H  
P1 9.88 usec  
SI 65536  
SF 400.1700000 MHz  
WDW EM  
SSB 0  
LB 0.30 Hz  
GB 0  
PC 1.00

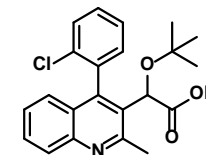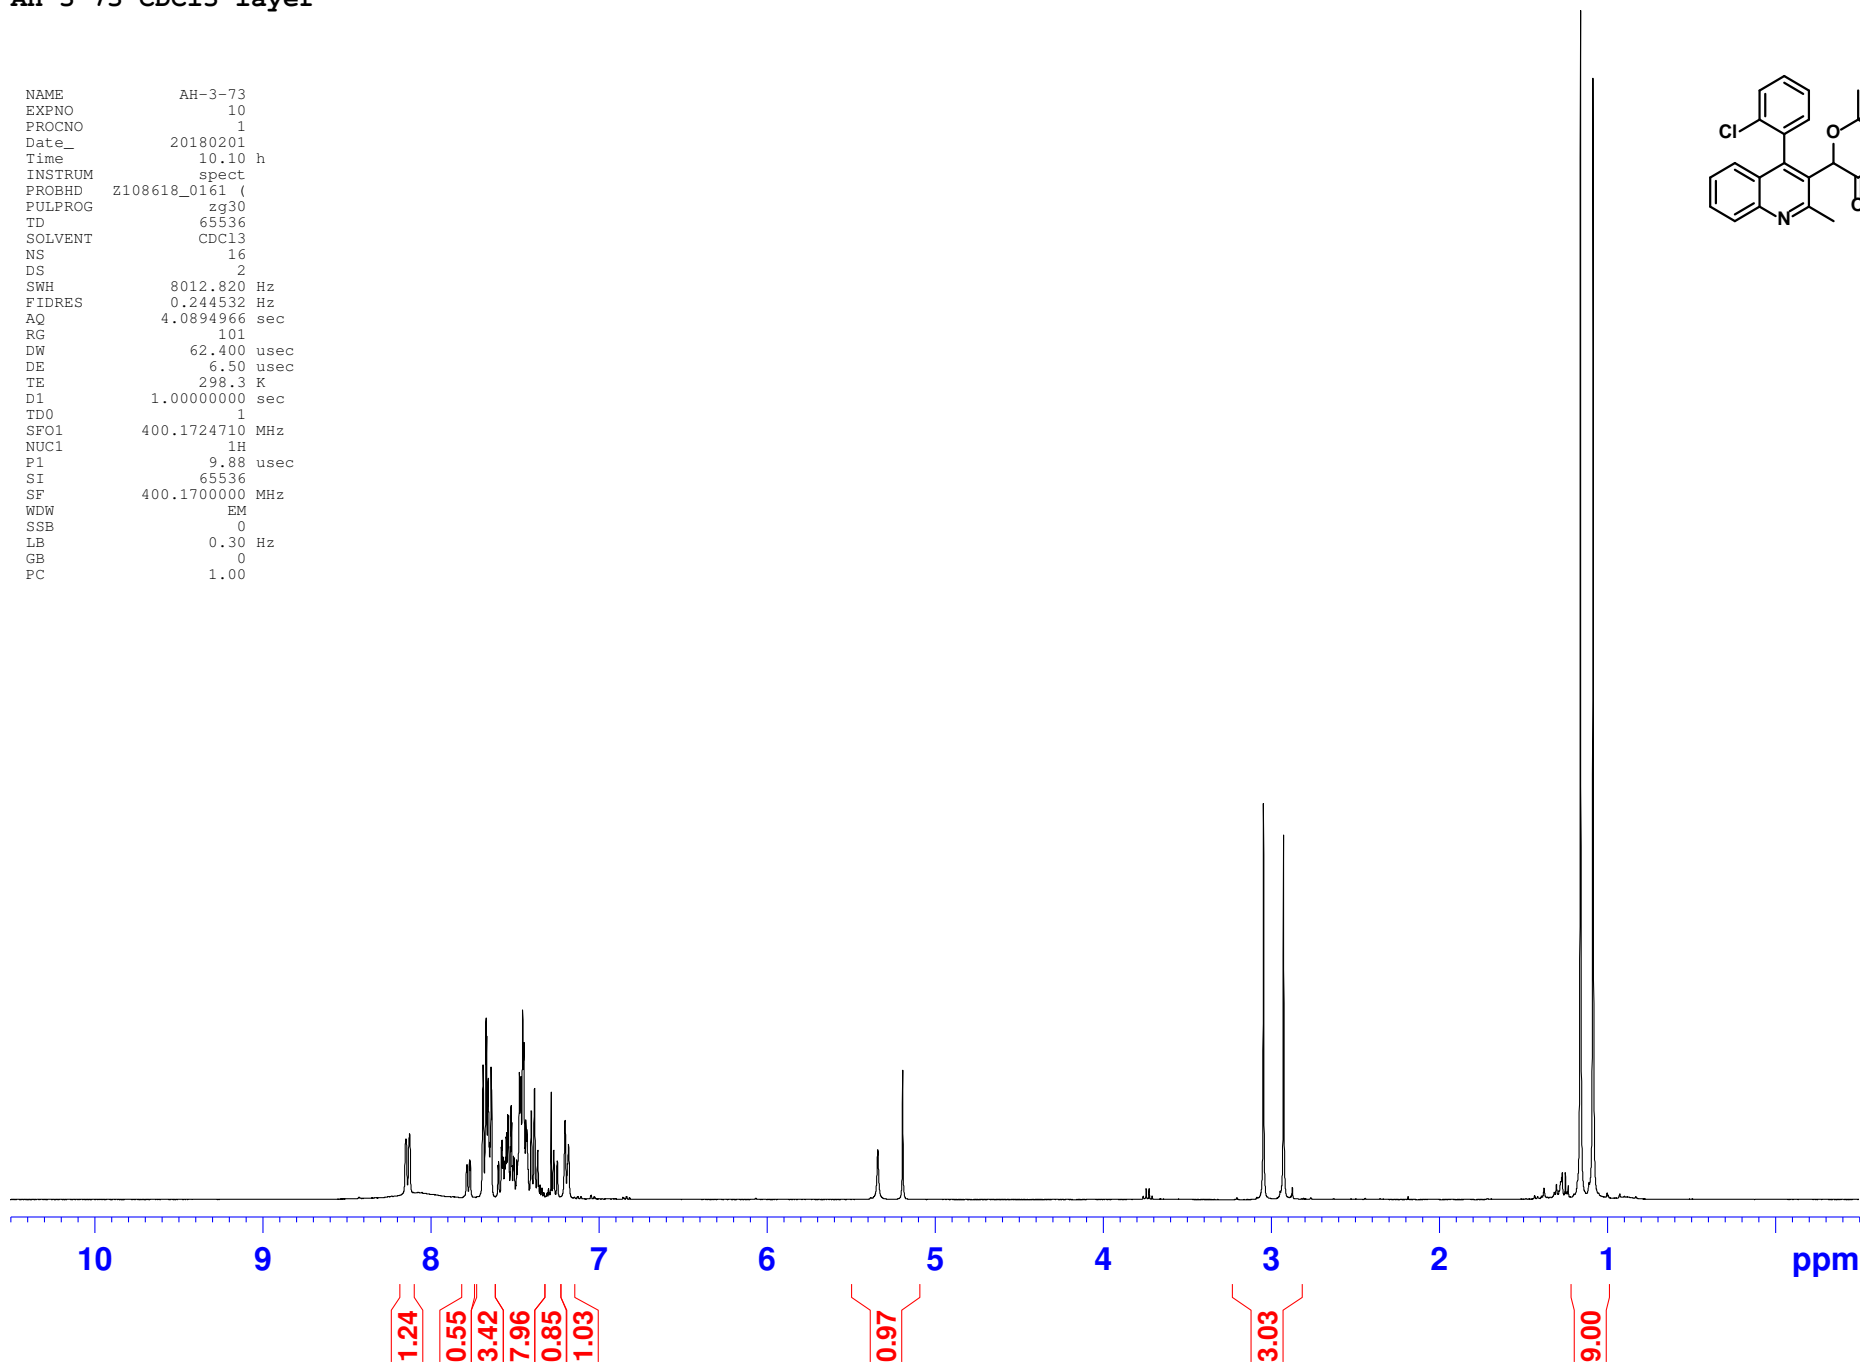

AH-3-73 Characterization

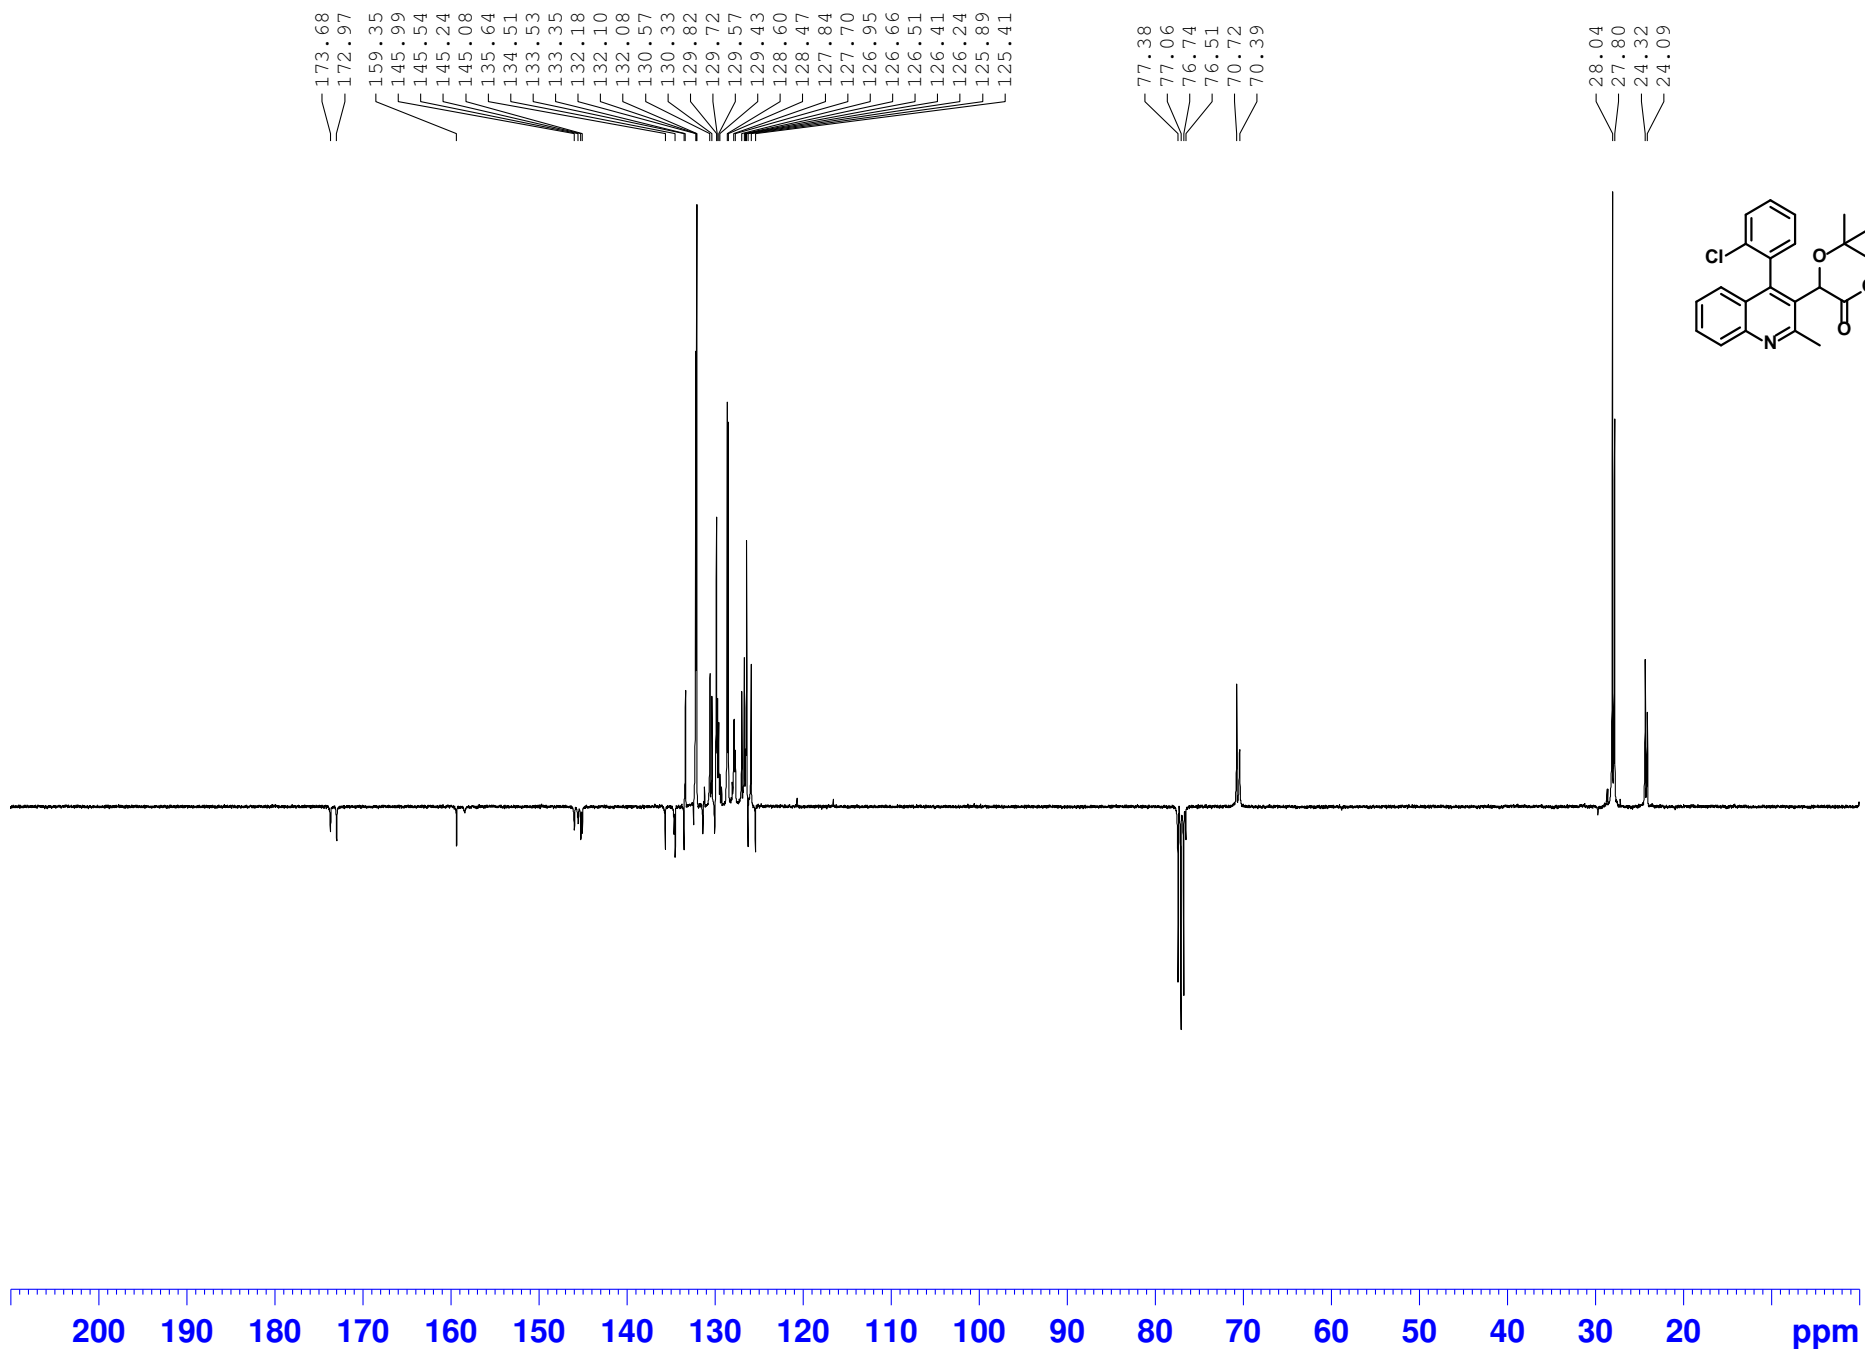



# Mass Spectrum List Report

## Analysis Info

Analysis Name F:\MS1-091514 - 080917\Data\apexdata031918\AH-3-73\_pos\_000001.d  
Method  
Sample Name AH-3-73  
Comment AH-3-73 in THF:MeOH C22H22ClNO3 H+

Acquisition Date 3/19/2018 10:55:47 AM  
Operator FTMS\_USER  
Instrument apex-Qe

Sample Name AH-3-73 in THF:MeOH  
Exact Mass of C22H22ClNO3 H+ = 384.136098 m/z  
Mass Observed = 384.136256 m/z

Difference < 1.0 ppm

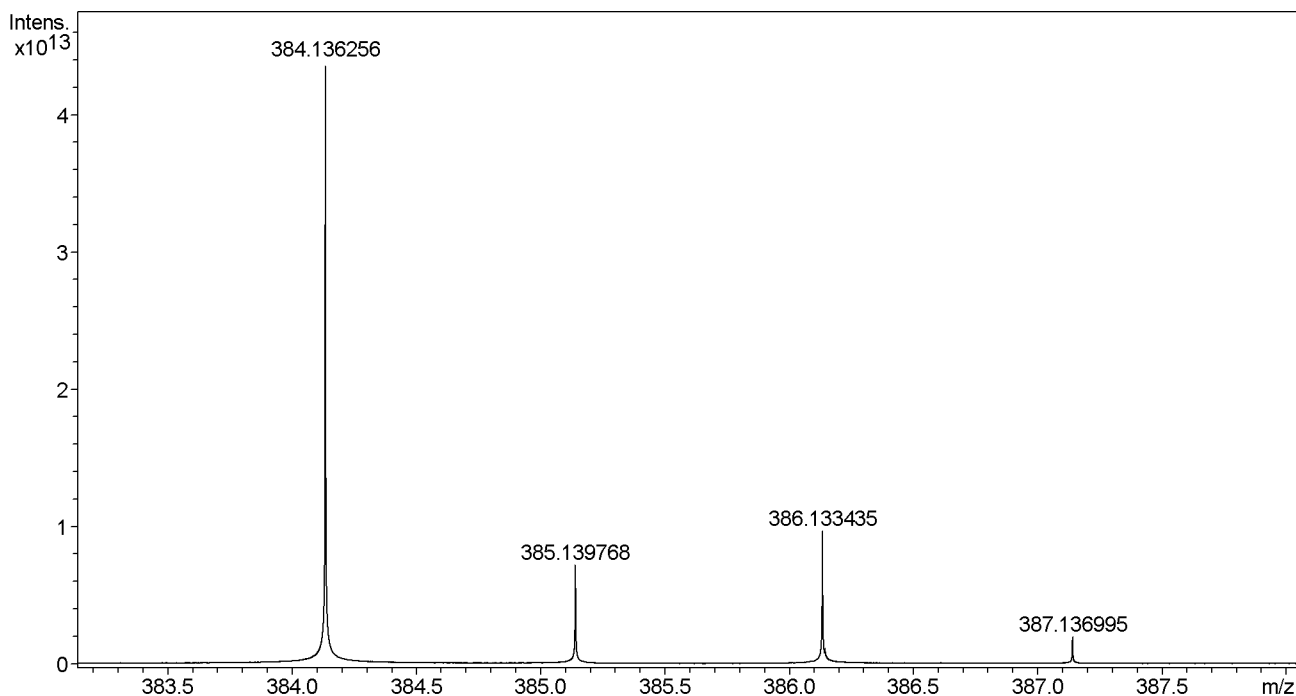

| #  | m/z        | I            |
|----|------------|--------------|
| 1  | 184.479504 | 22062649394  |
| 2  | 185.647052 | 21818182739  |
| 3  | 188.775655 | 21806568082  |
| 4  | 190.107631 | 22326049022  |
| 5  | 191.575980 | 28687588259  |
| 6  | 191.592467 | 21422141607  |
| 7  | 192.067895 | 21950563977  |
| 8  | 192.070589 | 147874204245 |
| 9  | 192.071045 | 237184780715 |
| 10 | 193.069660 | 52310397052  |
| 11 | 194.864873 | 21993979726  |
| 12 | 195.904712 | 21933335277  |
| 13 | 198.110760 | 21240119271  |
| 14 | 200.931044 | 21972953482  |
| 15 | 202.340500 | 26170411851  |
| 16 | 204.236051 | 22078179834  |
| 17 | 204.339714 | 22979413011  |
| 18 | 205.341361 | 22356610912  |
| 19 | 206.603213 | 22425925732  |
| 20 | 206.983821 | 21125391950  |

---

# Mass Spectrum List Report

---

| #  | m/z        | I             |
|----|------------|---------------|
| 21 | 207.572488 | 22002111159   |
| 22 | 209.441964 | 21335801995   |
| 23 | 215.020414 | 21594396237   |
| 24 | 215.959384 | 21100176929   |
| 25 | 217.088502 | 21597524602   |
| 26 | 218.096572 | 22752796159   |
| 27 | 218.774472 | 22482370684   |
| 28 | 218.908207 | 21515631333   |
| 29 | 222.322984 | 21234561413   |
| 30 | 224.531564 | 21277973431   |
| 31 | 230.933393 | 22183350068   |
| 32 | 231.099666 | 23054591689   |
| 33 | 237.562220 | 23122077881   |
| 34 | 238.381939 | 21541413048   |
| 35 | 239.284702 | 24662310473   |
| 36 | 239.664124 | 23387417683   |
| 37 | 241.654462 | 21476850756   |
| 38 | 244.889329 | 22063658900   |
| 39 | 246.091348 | 42979244332   |
| 40 | 247.171659 | 35888872133   |
| 41 | 248.106826 | 22921518847   |
| 42 | 249.110340 | 22751421375   |
| 43 | 261.555805 | 22113316899   |
| 44 | 263.129971 | 21931730891   |
| 45 | 266.120417 | 24786134136   |
| 46 | 268.219313 | 23138008891   |
| 47 | 269.828938 | 23886052207   |
| 48 | 270.849108 | 22085063828   |
| 49 | 276.102394 | 24726608192   |
| 50 | 276.472076 | 22311259312   |
| 51 | 279.621081 | 22065084061   |
| 52 | 282.067860 | 44075457091   |
| 53 | 282.498751 | 21733672921   |
| 54 | 285.407409 | 22382849180   |
| 55 | 286.942611 | 22656727064   |
| 56 | 288.906029 | 23522131879   |
| 57 | 289.783412 | 22920291758   |
| 58 | 300.998580 | 21340849108   |
| 59 | 301.021141 | 23643425477   |
| 60 | 301.075680 | 1754447959368 |
| 61 | 301.145988 | 23953214026   |
| 62 | 302.079123 | 200900634718  |
| 63 | 302.090129 | 21411711048   |
| 64 | 303.079815 | 25977666408   |
| 65 | 304.406291 | 21305917635   |
| 66 | 304.609407 | 23592682352   |
| 67 | 310.888041 | 22360338398   |
| 68 | 311.821669 | 22250793360   |
| 69 | 312.595415 | 22047227842   |
| 70 | 313.937356 | 22840564365   |
| 71 | 322.282499 | 28012046013   |
| 72 | 324.388082 | 86718017305   |
| 73 | 325.525726 | 22082078501   |
| 74 | 326.025999 | 23553645133   |
| 75 | 328.694961 | 261233508360  |
| 76 | 328.695794 | 155109251427  |
| 77 | 328.697229 | 127130139957  |
| 78 | 329.062863 | 24493876975   |
| 79 | 329.077004 | 22412450102   |
| 80 | 330.069978 | 29675575119   |
| 81 | 332.045491 | 25496523543   |
| 82 | 340.002719 | 23586076164   |
| 83 | 340.100145 | 24185592202   |
| 84 | 340.146755 | 1300311277749 |

---

# Mass Spectrum List Report

---

| #   | m/z        | I              |
|-----|------------|----------------|
| 85  | 340.186398 | 34012450801    |
| 86  | 340.211842 | 22778360819    |
| 87  | 340.239488 | 22849695902    |
| 88  | 341.150222 | 180019559077   |
| 89  | 342.143923 | 272829325204   |
| 90  | 343.147206 | 39874072356    |
| 91  | 368.338731 | 29752692459    |
| 92  | 369.015042 | 25039391708    |
| 93  | 370.157569 | 27414656919    |
| 94  | 372.136704 | 1113905323910  |
| 95  | 372.223079 | 26735700211    |
| 96  | 373.140321 | 101888014551   |
| 97  | 374.133860 | 260373333153   |
| 98  | 375.137220 | 37326212303    |
| 99  | 377.436748 | 25261612878    |
| 100 | 380.552108 | 28748919506    |
| 101 | 381.345718 | 27664857016    |
| 102 | 381.489734 | 26420678771    |
| 103 | 381.509739 | 24108116529    |
| 104 | 382.026410 | 26926548410    |
| 105 | 382.104112 | 24505894943    |
| 106 | 382.123690 | 27992992172    |
| 107 | 382.162502 | 26391149898    |
| 108 | 382.257658 | 24256752416    |
| 109 | 382.273978 | 24817895592    |
| 110 | 382.398619 | 28242191878    |
| 111 | 382.476931 | 27785800214    |
| 112 | 382.505583 | 27704485124    |
| 113 | 382.538268 | 31311226962    |
| 114 | 382.583181 | 29894892048    |
| 115 | 382.600267 | 29618892884    |
| 116 | 382.626857 | 27052274113    |
| 117 | 382.661162 | 31608446032    |
| 118 | 382.722759 | 28546699775    |
| 119 | 382.761930 | 28337328176    |
| 120 | 382.783541 | 29019968467    |
| 121 | 382.798421 | 27565687796    |
| 122 | 382.836386 | 36662174755    |
| 123 | 382.853545 | 29265062441    |
| 124 | 382.876010 | 28664756260    |
| 125 | 382.908557 | 27414169536    |
| 126 | 382.962924 | 34109795867    |
| 127 | 383.030851 | 35022052645    |
| 128 | 383.039642 | 33088507485    |
| 129 | 383.094667 | 33184330365    |
| 130 | 383.117498 | 36205926699    |
| 131 | 383.127753 | 49751048200    |
| 132 | 383.143013 | 32264550712    |
| 133 | 383.154780 | 35615660096    |
| 134 | 383.199687 | 41220028104    |
| 135 | 383.209578 | 37550156454    |
| 136 | 383.262100 | 40094420583    |
| 137 | 383.313327 | 48013437560    |
| 138 | 383.360630 | 43522600024    |
| 139 | 383.417599 | 41127220050    |
| 140 | 383.481997 | 48394636567    |
| 141 | 383.500986 | 52112390656    |
| 142 | 383.588843 | 53867404385    |
| 143 | 383.617856 | 57390783392    |
| 144 | 383.657044 | 66500845326    |
| 145 | 383.736609 | 76619387947    |
| 146 | 383.812918 | 91690389862    |
| 147 | 383.832892 | 98720836663    |
| 148 | 384.136256 | 43809523131870 |

---

# Mass Spectrum List Report

---

| #   | m/z        | I             |
|-----|------------|---------------|
| 149 | 384.308898 | 155307304829  |
| 150 | 384.325145 | 141381997805  |
| 151 | 384.345354 | 131831295550  |
| 152 | 384.394055 | 111059527883  |
| 153 | 384.456746 | 93823627841   |
| 154 | 384.477486 | 86296144120   |
| 155 | 384.505951 | 80660118373   |
| 156 | 384.545066 | 75948133476   |
| 157 | 384.584037 | 65037953476   |
| 158 | 384.643488 | 62956757917   |
| 159 | 384.747317 | 52870898481   |
| 160 | 384.751022 | 53619266116   |
| 161 | 384.776689 | 54546110581   |
| 162 | 384.822081 | 56380481698   |
| 163 | 384.882670 | 55034043049   |
| 164 | 384.927909 | 56558556201   |
| 165 | 384.981612 | 64576515374   |
| 166 | 385.139768 | 7190618095718 |
| 167 | 385.256293 | 46262577644   |
| 168 | 385.328049 | 30330119785   |
| 169 | 385.337653 | 30093721308   |
| 170 | 385.370691 | 26470076899   |
| 171 | 385.390269 | 24953677800   |
| 172 | 385.429195 | 26834245920   |
| 173 | 385.681500 | 25933672368   |
| 174 | 385.858340 | 29428763169   |
| 175 | 385.885971 | 30479537349   |
| 176 | 385.915550 | 28970310639   |
| 177 | 385.949810 | 36627665672   |
| 178 | 386.133435 | 9642492570481 |
| 179 | 386.143651 | 1102486812912 |
| 180 | 386.314095 | 57705309753   |
| 181 | 386.336989 | 51318182423   |
| 182 | 386.347870 | 53465870622   |
| 183 | 386.393291 | 46829757108   |
| 184 | 386.414539 | 48675172943   |
| 185 | 386.447278 | 47288953071   |
| 186 | 386.464070 | 48404105721   |
| 187 | 386.534310 | 40647444773   |
| 188 | 386.559472 | 42055406962   |
| 189 | 386.608167 | 51349849824   |
| 190 | 386.631385 | 35393029368   |
| 191 | 386.652275 | 30105113648   |
| 192 | 386.699371 | 31599809083   |
| 193 | 386.730770 | 27699969478   |
| 194 | 386.760998 | 32367341313   |
| 195 | 386.797784 | 32311948423   |
| 196 | 386.828254 | 24283284200   |
| 197 | 386.866412 | 30184563895   |
| 198 | 386.894572 | 29565963241   |
| 199 | 386.959105 | 32833827069   |
| 200 | 386.978764 | 31101250167   |
| 201 | 387.001535 | 30368310376   |
| 202 | 387.024585 | 32819888775   |
| 203 | 387.047770 | 38429774179   |
| 204 | 387.136995 | 1948713415193 |
| 205 | 387.193565 | 30758820185   |
| 206 | 387.243575 | 24633763545   |
| 207 | 387.298980 | 24426905234   |
| 208 | 387.340513 | 24382418216   |
| 209 | 387.374986 | 23922291795   |
| 210 | 387.533203 | 25027386319   |
| 211 | 387.660335 | 24898167996   |
| 212 | 388.140638 | 122953137212  |

---

# Mass Spectrum List Report

---

| #   | m/z        | I             |
|-----|------------|---------------|
| 213 | 388.496814 | 23874845219   |
| 214 | 389.141220 | 25536836861   |
| 215 | 390.281953 | 23952845058   |
| 216 | 392.151583 | 25782777435   |
| 217 | 398.152550 | 27852265445   |
| 218 | 398.242225 | 90022083972   |
| 219 | 399.810352 | 23335967761   |
| 220 | 406.116755 | 145499338955  |
| 221 | 406.118836 | 321118980299  |
| 222 | 407.122085 | 52078917104   |
| 223 | 408.116037 | 69598116242   |
| 224 | 409.315439 | 24391595903   |
| 225 | 410.550647 | 22847630260   |
| 226 | 415.550137 | 23239468397   |
| 227 | 421.477331 | 23920729753   |
| 228 | 422.275335 | 23786982105   |
| 229 | 426.289858 | 24070973363   |
| 230 | 428.086558 | 78461426834   |
| 231 | 428.100835 | 202184750322  |
| 232 | 428.217522 | 26059640361   |
| 233 | 429.104262 | 35776082241   |
| 234 | 430.084553 | 42701673099   |
| 235 | 430.097988 | 51845041044   |
| 236 | 435.345467 | 30824461234   |
| 237 | 435.828772 | 22737967835   |
| 238 | 440.199595 | 68501658030   |
| 239 | 443.096616 | 22526209917   |
| 240 | 443.707688 | 22281919540   |
| 241 | 447.555876 | 22737892923   |
| 242 | 447.613116 | 22646637444   |
| 243 | 451.889152 | 25786965241   |
| 244 | 459.120763 | 22600197120   |
| 245 | 460.168188 | 29915893867   |
| 246 | 463.262980 | 24387003614   |
| 247 | 471.891652 | 22639936798   |
| 248 | 474.607711 | 24563711534   |
| 249 | 476.704869 | 24128059212   |
| 250 | 486.059568 | 22462047733   |
| 251 | 490.798303 | 22673395335   |
| 252 | 492.043420 | 33718061538   |
| 253 | 498.432620 | 22487881767   |
| 254 | 505.485008 | 25257459258   |
| 255 | 508.582793 | 184131290153  |
| 256 | 509.586116 | 52735223055   |
| 257 | 519.388859 | 22985665695   |
| 258 | 524.577593 | 33707348929   |
| 259 | 525.581088 | 22167932755   |
| 260 | 536.551885 | 33666243803   |
| 261 | 536.614056 | 835112933982  |
| 262 | 537.593783 | 28434609104   |
| 263 | 537.617533 | 223677943818  |
| 264 | 537.957610 | 22978708353   |
| 265 | 552.609036 | 158854968155  |
| 266 | 553.612771 | 55527626071   |
| 267 | 556.442785 | 22484009235   |
| 268 | 564.645513 | 161200296327  |
| 269 | 565.648904 | 56166379197   |
| 270 | 578.835894 | 22758630028   |
| 271 | 579.162643 | 1517693425318 |
| 272 | 579.313713 | 31567526709   |
| 273 | 580.166196 | 466101965787  |
| 274 | 581.169844 | 56687597716   |
| 275 | 592.677048 | 183263461441  |
| 276 | 593.660148 | 22683545920   |

---

## Mass Spectrum List Report

---

| #   | m/z        | I           |
|-----|------------|-------------|
| 277 | 593.680317 | 69812327053 |
| 278 | 595.062326 | 22670711957 |
| 279 | 596.548946 | 25214414867 |
| 280 | 599.549962 | 35676078935 |
| 281 | 601.203475 | 34341721036 |
| 282 | 603.218917 | 26813973903 |
| 283 | 608.672153 | 34048785283 |
| 284 | 608.796888 | 23772301498 |
| 285 | 614.804732 | 23360632676 |
| 286 | 617.383802 | 23898960831 |
| 287 | 624.180892 | 23314044717 |
| 288 | 624.418689 | 22813716211 |
| 289 | 633.018042 | 22919904174 |
| 290 | 655.747976 | 23836211484 |
| 291 | 677.408884 | 27971694839 |
| 292 | 685.437426 | 57297344681 |
| 293 | 685.470320 | 25595828742 |
| 294 | 686.440628 | 26710853117 |
| 295 | 691.140768 | 24342978324 |
| 296 | 721.652543 | 24039062530 |
| 297 | 739.971373 | 24710606370 |
| 298 | 763.765281 | 23721178332 |
| 299 | 787.909603 | 22882471763 |
| 300 | 861.976459 | 23113953855 |
| 301 | 960.820125 | 26620464776 |
| 302 | 965.663837 | 25389804042 |
| 303 | 977.101886 | 23571501632 |

AH-3-72 Characterization (CDC13, 400MHz)

NAME AH-3-72  
EXPNO 20  
PROCNO 1  
Date\_ 20180212  
Time\_ 20.57 h  
INSTRUM spect  
PROBHD Z108618\_0161 (  
PULPROG zg30  
TD 65536  
SOLVENT CDC13  
NS 16  
DS 2  
SWH 8012.820 Hz  
FIDRES 0.244532 Hz  
AQ 4.0894966 sec  
RG 203  
DW 62.400 usec  
DE 6.50 usec  
TE 298.3 K  
D1 1.00000000 sec  
TD0 1  
SF01 400.1724710 MHz  
NUC1 1H  
P1 9.88 usec  
SI 65536  
SF 400.1715820 MHz  
WDW EM  
SSB 0  
LB 0.30 Hz  
GB 0  
PC 1.00

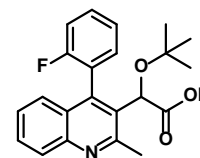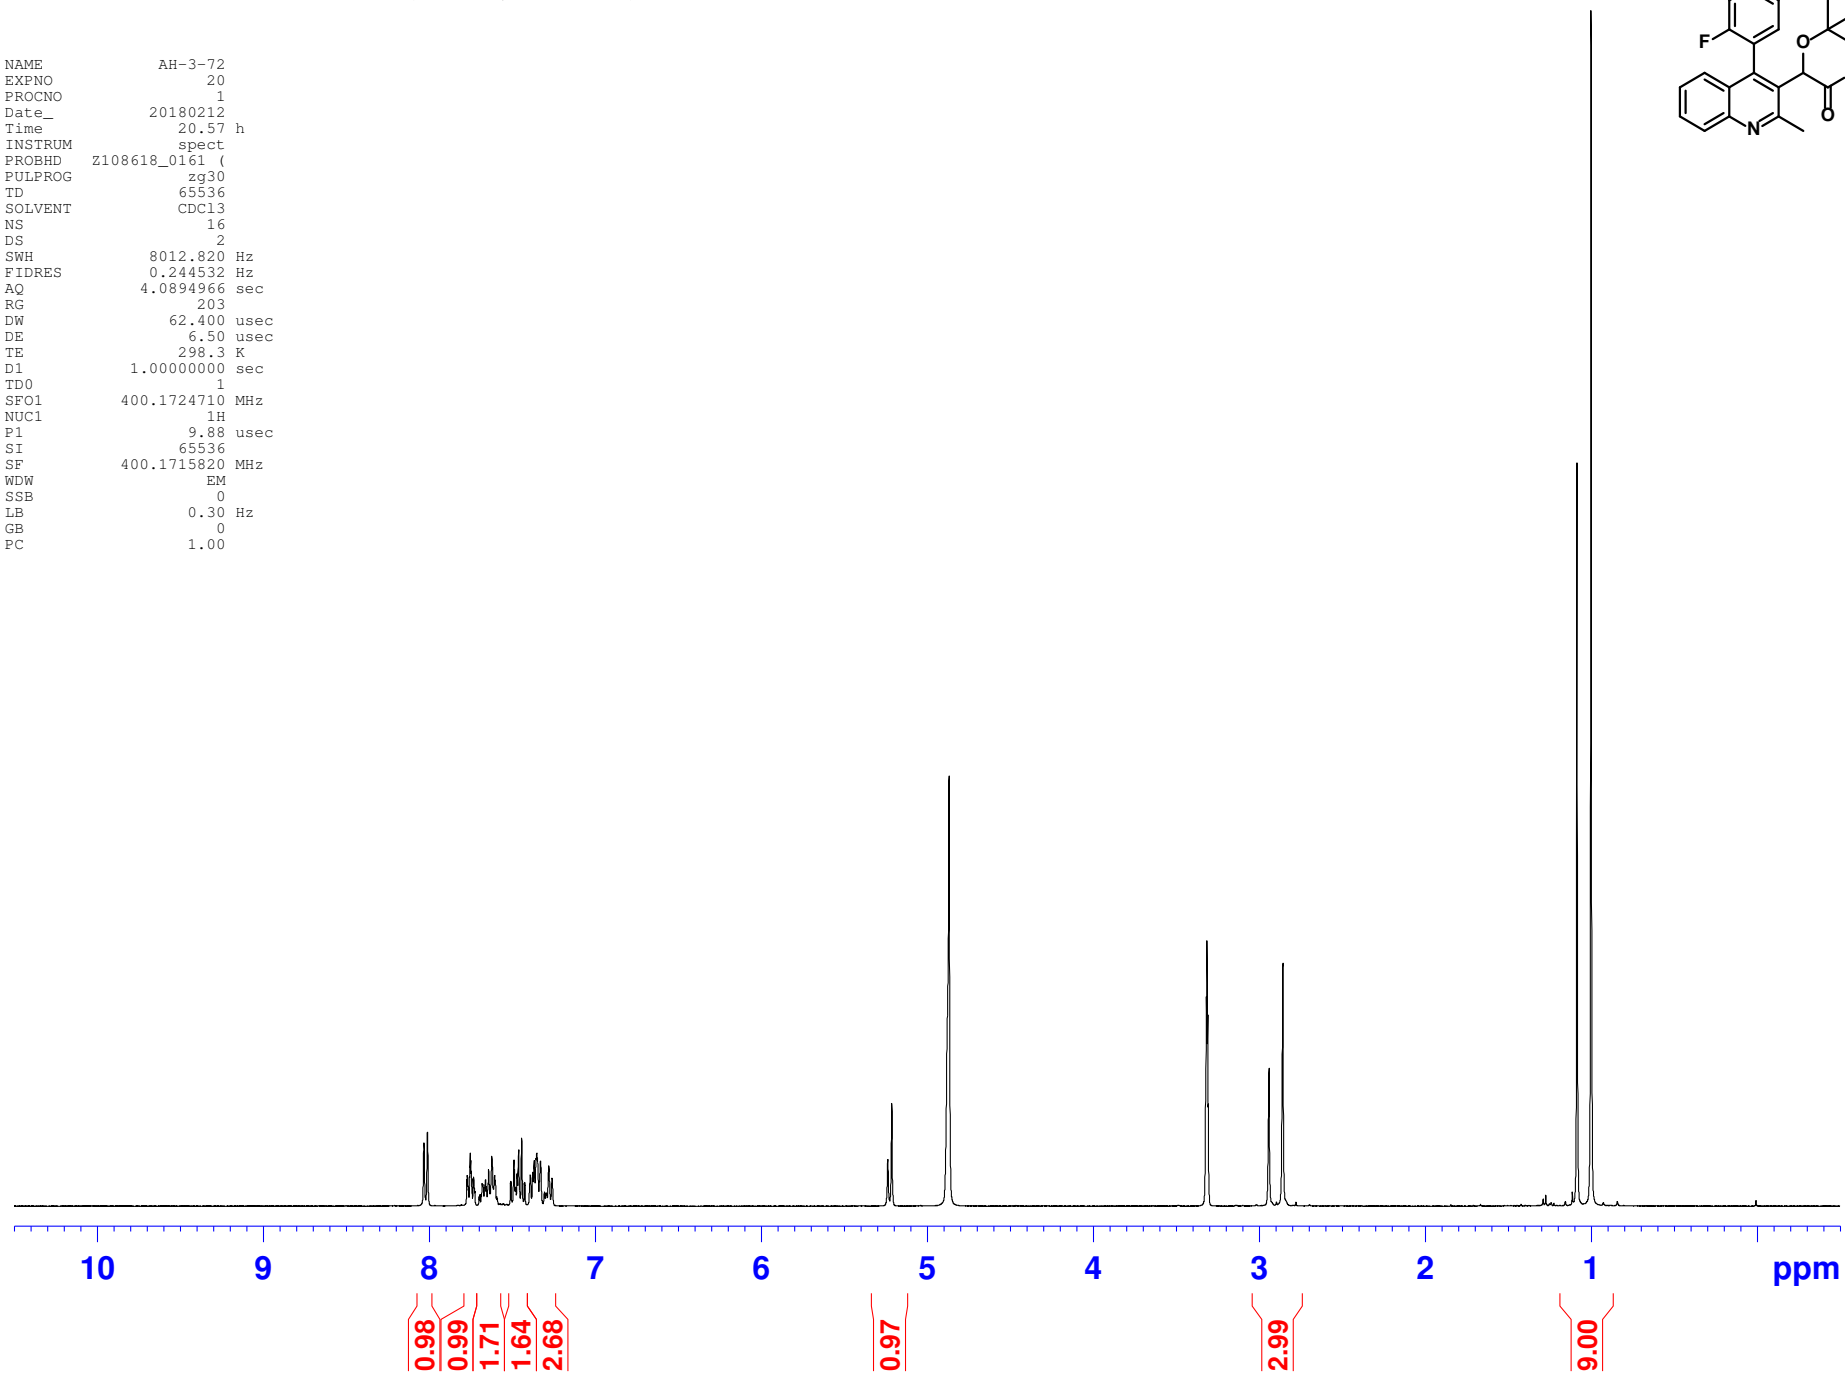

AH-3-72 Characterization (CDCl<sub>3</sub>, 400MHz)

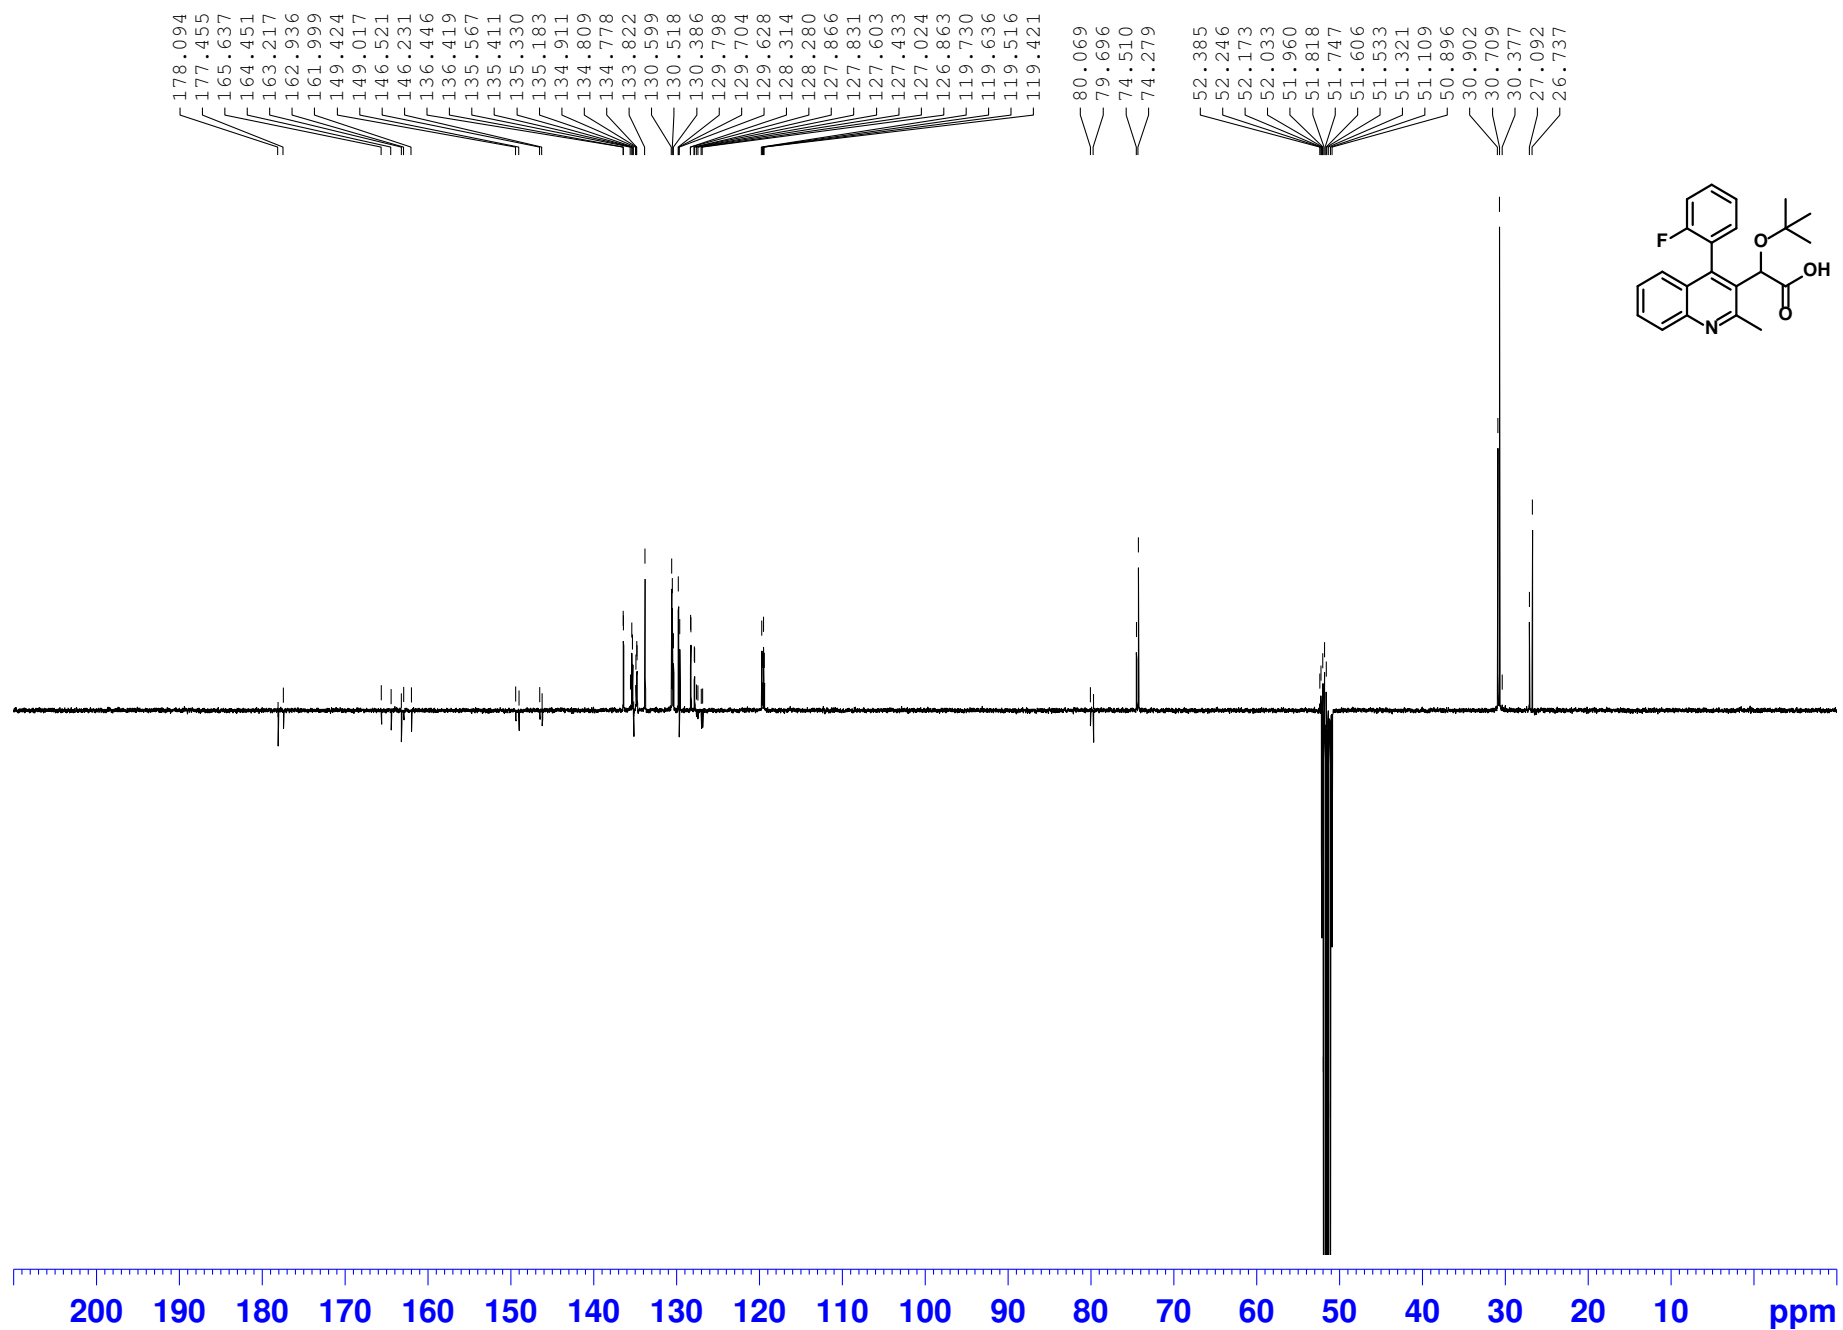



# Mass Spectrum List Report

## Analysis Info

Analysis Name F:\MS1-091514 - 080917\Data\apexdata031918\AH-3-72\_pos\_000001.d  
Method  
Sample Name AH-3-72  
Comment AH-3-72 in THF:MeOH C22H22FNO3 H+

Acquisition Date 3/19/2018 11:46:34 AM  
Operator FTMS\_USER  
Instrument apex-Qe

Sample Name AH-3-72 in THF:MeOH  
Exact Mass of C22H22FNO3 H+ = 368.165648 m/z  
Mass Observed = 368.165878 m/z

Difference < 1.0 ppm

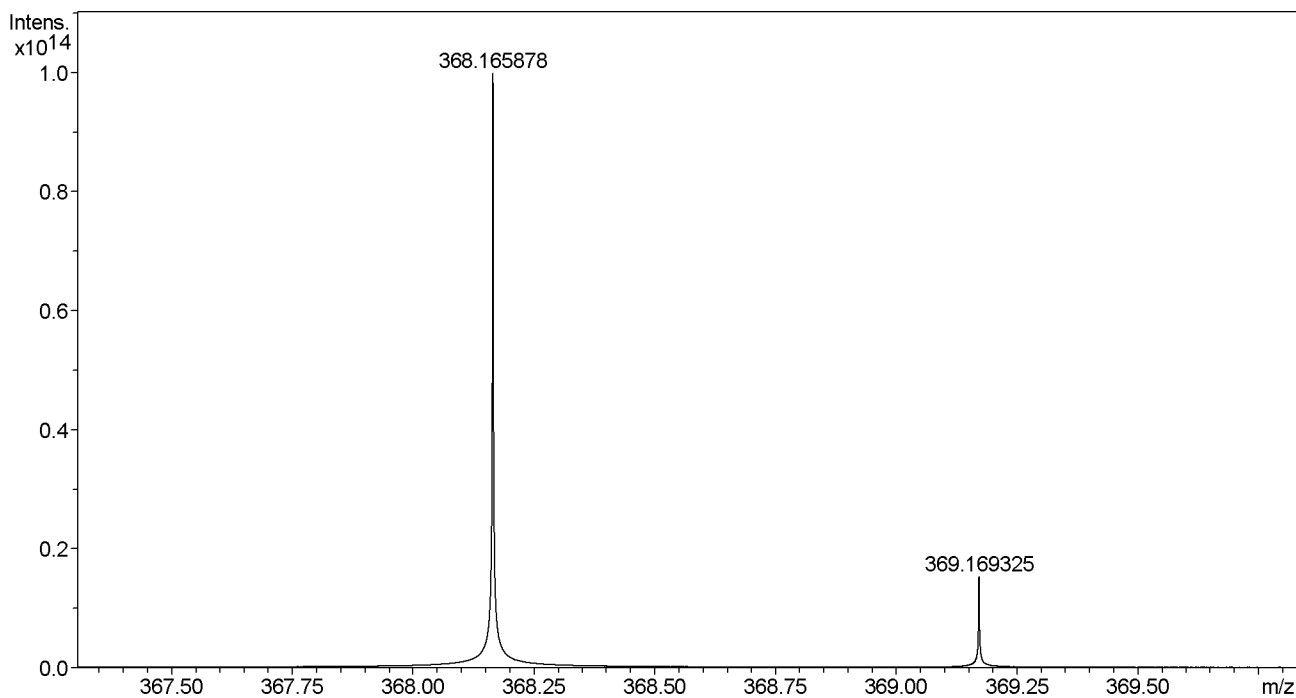

| #  | m/z        | I            |
|----|------------|--------------|
| 1  | 184.513784 | 356447518873 |
| 2  | 184.587349 | 135771809014 |
| 3  | 184.601590 | 21567838472  |
| 4  | 184.691540 | 24447821410  |
| 5  | 184.814763 | 21106696160  |
| 6  | 184.943833 | 51479874577  |
| 7  | 185.095518 | 22213033661  |
| 8  | 185.296864 | 21174478623  |
| 9  | 187.638660 | 22015557561  |
| 10 | 188.617117 | 22480510277  |
| 11 | 188.720321 | 24082826237  |
| 12 | 189.226961 | 21182058490  |
| 13 | 190.061603 | 25153355807  |
| 14 | 190.352916 | 21669688146  |
| 15 | 190.965227 | 21349011319  |
| 16 | 191.270649 | 25094959156  |
| 17 | 193.735686 | 23791456210  |
| 18 | 194.839092 | 23439826295  |
| 19 | 194.850347 | 23564777334  |
| 20 | 200.681086 | 22692333499  |

---

# Mass Spectrum List Report

---

| #  | m/z        | I           |
|----|------------|-------------|
| 21 | 200.721600 | 21438347074 |
| 22 | 202.077824 | 22944887299 |
| 23 | 202.340491 | 21169694452 |
| 24 | 206.083787 | 21296577194 |
| 25 | 206.327134 | 23323291199 |
| 26 | 206.369290 | 21764958275 |
| 27 | 207.845665 | 22703643258 |
| 28 | 208.846072 | 21322465485 |
| 29 | 208.983973 | 21754831876 |
| 30 | 210.238525 | 21113288267 |
| 31 | 210.411017 | 21236912349 |
| 32 | 210.442540 | 22705002424 |
| 33 | 213.830053 | 23688091350 |
| 34 | 214.089215 | 22160820803 |
| 35 | 215.670402 | 21471103881 |
| 36 | 217.088737 | 55423810364 |
| 37 | 217.673459 | 21352075879 |
| 38 | 222.071139 | 22309282116 |
| 39 | 222.239692 | 23724315814 |
| 40 | 226.771631 | 23875286601 |
| 41 | 227.664028 | 21680622869 |
| 42 | 228.080626 | 27327133595 |
| 43 | 228.421089 | 23536348974 |
| 44 | 230.147251 | 21648418391 |
| 45 | 230.152403 | 21336790835 |
| 46 | 232.697610 | 24084939145 |
| 47 | 234.071494 | 22521746513 |
| 48 | 236.086863 | 43883726319 |
| 49 | 239.246988 | 23412020861 |
| 50 | 242.532655 | 22948232751 |
| 51 | 246.091373 | 44940770476 |
| 52 | 246.328125 | 22500932826 |
| 53 | 247.171674 | 31069094130 |
| 54 | 247.857235 | 22324301660 |
| 55 | 248.169147 | 23091616989 |
| 56 | 250.102678 | 25114691300 |
| 57 | 251.832274 | 21876522006 |
| 58 | 252.965691 | 24332670590 |
| 59 | 257.695301 | 22224988055 |
| 60 | 258.394027 | 28009424677 |
| 61 | 263.312602 | 22123394773 |
| 62 | 264.240740 | 21364606517 |
| 63 | 266.097941 | 43860876163 |
| 64 | 266.725018 | 23143640056 |
| 65 | 267.100717 | 34110536187 |
| 66 | 267.105625 | 44630567581 |
| 67 | 268.104472 | 25366069687 |
| 68 | 270.337180 | 22678313949 |
| 69 | 270.960298 | 26403410766 |
| 70 | 277.530090 | 22813797710 |
| 71 | 278.319165 | 22633230092 |
| 72 | 279.503743 | 22470947123 |
| 73 | 282.273512 | 22105407518 |
| 74 | 293.475598 | 21979552323 |
| 75 | 294.087875 | 23227947716 |
| 76 | 296.093599 | 21515312654 |
| 77 | 296.272696 | 21618513936 |
| 78 | 300.602904 | 24435210167 |
| 79 | 300.653929 | 21897047166 |
| 80 | 301.075895 | 71304765989 |
| 81 | 303.104438 | 21333085069 |
| 82 | 306.634420 | 22060668861 |
| 83 | 309.148649 | 23233386522 |
| 84 | 311.059503 | 21406855276 |

---

# Mass Spectrum List Report

---

| #   | m/z        | I            |
|-----|------------|--------------|
| 85  | 312.102907 | 67742698464  |
| 86  | 312.428128 | 22464262984  |
| 87  | 312.488366 | 23150316122  |
| 88  | 313.034968 | 21549348812  |
| 89  | 313.106727 | 34857119720  |
| 90  | 313.720915 | 22445602682  |
| 91  | 316.075041 | 215045737680 |
| 92  | 316.188417 | 26963594595  |
| 93  | 321.470225 | 22359966447  |
| 94  | 324.143296 | 23156156716  |
| 95  | 324.176337 | 895808459029 |
| 96  | 325.179955 | 67501365493  |
| 97  | 328.215616 | 23867047084  |
| 98  | 328.771344 | 24274390996  |
| 99  | 328.873791 | 23309118207  |
| 100 | 333.538363 | 24915212761  |
| 101 | 334.085878 | 32759140751  |
| 102 | 337.975666 | 26028545211  |
| 103 | 340.304062 | 27738988701  |
| 104 | 354.187184 | 48509376041  |
| 105 | 356.166327 | 28042618560  |
| 106 | 359.725634 | 27431111889  |
| 107 | 362.250754 | 28710036456  |
| 108 | 362.323359 | 28764475887  |
| 109 | 363.062126 | 31023129050  |
| 110 | 363.200503 | 28152478850  |
| 111 | 363.908277 | 27968470629  |
| 112 | 364.058813 | 28448413187  |
| 113 | 364.204527 | 28019857242  |
| 114 | 364.352569 | 31106407908  |
| 115 | 364.396820 | 28505192526  |
| 116 | 364.463726 | 28301240440  |
| 117 | 364.525857 | 33477963725  |
| 118 | 364.585943 | 30868503631  |
| 119 | 364.674330 | 28509975982  |
| 120 | 364.743900 | 34640648404  |
| 121 | 364.815401 | 30968649307  |
| 122 | 364.896467 | 29585288633  |
| 123 | 364.937071 | 31618134785  |
| 124 | 364.989684 | 32116508028  |
| 125 | 365.037347 | 29358821818  |
| 126 | 365.069336 | 32801942433  |
| 127 | 365.116311 | 35843952297  |
| 128 | 365.179157 | 39255262887  |
| 129 | 365.199477 | 32048601280  |
| 130 | 365.239713 | 30952363533  |
| 131 | 365.251327 | 30494299301  |
| 132 | 365.276394 | 31728339202  |
| 133 | 365.298956 | 35072273180  |
| 134 | 365.359433 | 32980251612  |
| 135 | 365.387278 | 35593928223  |
| 136 | 365.410358 | 32211652263  |
| 137 | 365.456209 | 34977514726  |
| 138 | 365.524522 | 36248105658  |
| 139 | 365.568948 | 35594289207  |
| 140 | 365.680298 | 34864377494  |
| 141 | 365.743036 | 39316323999  |
| 142 | 365.769263 | 43730892790  |
| 143 | 365.812013 | 37206775530  |
| 144 | 365.825073 | 38447885434  |
| 145 | 365.846190 | 34228069740  |
| 146 | 365.891289 | 36952992755  |
| 147 | 365.901720 | 37077663411  |
| 148 | 365.944142 | 38950376241  |

---

# Mass Spectrum List Report

---

| #   | m/z        | I              |
|-----|------------|----------------|
| 149 | 366.040945 | 40952454599    |
| 150 | 366.057391 | 45040308374    |
| 151 | 366.223749 | 48394768234    |
| 152 | 366.248024 | 46153569491    |
| 153 | 366.262728 | 47652410284    |
| 154 | 366.320915 | 45504851571    |
| 155 | 366.346469 | 45607026899    |
| 156 | 366.364419 | 48237005289    |
| 157 | 366.400178 | 49395374729    |
| 158 | 366.464628 | 64529563288    |
| 159 | 366.486600 | 45286771672    |
| 160 | 366.534376 | 49843931970    |
| 161 | 366.557641 | 50256348902    |
| 162 | 366.675935 | 51214575153    |
| 163 | 366.754637 | 54776133866    |
| 164 | 366.863823 | 64261682493    |
| 165 | 366.876969 | 118531395267   |
| 166 | 366.919512 | 60922808111    |
| 167 | 366.973698 | 70980277020    |
| 168 | 367.018123 | 68112911542    |
| 169 | 367.053631 | 69815844274    |
| 170 | 367.083321 | 71712031164    |
| 171 | 367.167752 | 82140111167    |
| 172 | 367.211029 | 76702347232    |
| 173 | 367.256422 | 84591659336    |
| 174 | 367.331494 | 87689426956    |
| 175 | 367.507756 | 107463485845   |
| 176 | 367.605236 | 127052191185   |
| 177 | 368.165878 | 99805271535965 |
| 178 | 368.211361 | 1352843793395  |
| 179 | 368.342576 | 376201293781   |
| 180 | 368.454089 | 236017196856   |
| 181 | 368.543886 | 181637157540   |
| 182 | 368.661836 | 134867756356   |
| 183 | 368.722791 | 126837184457   |
| 184 | 368.897634 | 99332446032    |
| 185 | 368.916793 | 96061915173    |
| 186 | 368.956623 | 95587028309    |
| 187 | 369.169325 | 15283026844985 |
| 188 | 369.365296 | 88219589954    |
| 189 | 369.448822 | 84081802892    |
| 190 | 369.500767 | 68669612594    |
| 191 | 369.528999 | 68599624407    |
| 192 | 369.594313 | 71025312443    |
| 193 | 369.606325 | 65687287671    |
| 194 | 369.635078 | 68425908719    |
| 195 | 369.653263 | 64415515363    |
| 196 | 369.743675 | 59297091302    |
| 197 | 369.790793 | 58437776884    |
| 198 | 369.837738 | 55717754136    |
| 199 | 369.882447 | 550684867369   |
| 200 | 369.940604 | 57497767595    |
| 201 | 369.957930 | 50359497074    |
| 202 | 369.983108 | 54942306892    |
| 203 | 370.067531 | 54694903209    |
| 204 | 370.096539 | 55842514429    |
| 205 | 370.135517 | 56892413595    |
| 206 | 370.170643 | 288949548902   |
| 207 | 370.172955 | 966749121907   |
| 208 | 370.199330 | 29745810710    |
| 209 | 370.280066 | 41081998441    |
| 210 | 370.304220 | 43201910082    |
| 211 | 370.410346 | 43382481345    |
| 212 | 370.470292 | 44537571701    |

---

# Mass Spectrum List Report

---

| #   | m/z        | I             |
|-----|------------|---------------|
| 213 | 370.557419 | 38623911898   |
| 214 | 370.598295 | 43928879798   |
| 215 | 370.694024 | 39285929888   |
| 216 | 370.786990 | 35360637253   |
| 217 | 370.823423 | 42696048755   |
| 218 | 370.874521 | 35077701258   |
| 219 | 370.915948 | 36863329659   |
| 220 | 370.988460 | 33764801224   |
| 221 | 371.046551 | 34366963584   |
| 222 | 371.107374 | 36529039327   |
| 223 | 371.123987 | 32192128492   |
| 224 | 371.140209 | 32330661445   |
| 225 | 371.228305 | 34676229739   |
| 226 | 371.262281 | 34107491482   |
| 227 | 371.299525 | 38045970340   |
| 228 | 371.341372 | 38561040124   |
| 229 | 371.379367 | 31094284628   |
| 230 | 371.471384 | 31650409059   |
| 231 | 371.509095 | 31298998904   |
| 232 | 371.540756 | 30752464707   |
| 233 | 371.595033 | 31354810898   |
| 234 | 371.653230 | 34593837704   |
| 235 | 371.678112 | 34322576283   |
| 236 | 371.733335 | 35247071573   |
| 237 | 371.836730 | 35114908466   |
| 238 | 371.928882 | 34363115783   |
| 239 | 371.952000 | 28369720438   |
| 240 | 372.005870 | 28947962811   |
| 241 | 372.046710 | 28465939597   |
| 242 | 372.140658 | 32702666533   |
| 243 | 372.202523 | 30205071005   |
| 244 | 372.301019 | 33793486658   |
| 245 | 372.318120 | 32055897480   |
| 246 | 372.533134 | 35596774584   |
| 247 | 372.616048 | 30224684309   |
| 248 | 372.690266 | 34274209138   |
| 249 | 372.814270 | 31045237791   |
| 250 | 372.916169 | 29321014007   |
| 251 | 373.304820 | 28786902186   |
| 252 | 373.342308 | 30641862753   |
| 253 | 373.910343 | 29073265217   |
| 254 | 375.227320 | 28001910213   |
| 255 | 376.113524 | 30226175581   |
| 256 | 379.377240 | 27549370683   |
| 257 | 389.723743 | 27041660666   |
| 258 | 389.946395 | 27762683002   |
| 259 | 389.967912 | 30803403040   |
| 260 | 389.983729 | 30918207126   |
| 261 | 390.147936 | 3777879637060 |
| 262 | 390.273029 | 29226842326   |
| 263 | 391.151643 | 628474791006  |
| 264 | 392.155360 | 28788273311   |
| 265 | 398.242374 | 56492786803   |
| 266 | 409.360374 | 24182548625   |
| 267 | 410.424402 | 23785322862   |
| 268 | 412.129160 | 417778669413  |
| 269 | 412.130454 | 564193314685  |
| 270 | 413.133922 | 94731409737   |
| 271 | 418.574693 | 22875032063   |
| 272 | 422.274506 | 25267144096   |
| 273 | 424.229277 | 61013120944   |
| 274 | 433.012725 | 22236915614   |
| 275 | 445.303554 | 21353122364   |
| 276 | 449.327323 | 21546692113   |

---

# Mass Spectrum List Report

---

| #   | m/z        | I             |
|-----|------------|---------------|
| 277 | 451.164261 | 21746363597   |
| 278 | 453.502193 | 21496885791   |
| 279 | 467.583215 | 22595893256   |
| 280 | 468.786294 | 23203371383   |
| 281 | 468.928538 | 25115880988   |
| 282 | 472.229437 | 24117636325   |
| 283 | 480.551723 | 28144606328   |
| 284 | 480.761296 | 22188814784   |
| 285 | 489.263481 | 22896441239   |
| 286 | 499.258640 | 26651676825   |
| 287 | 508.582848 | 489872883902  |
| 288 | 508.615834 | 30292461914   |
| 289 | 509.586303 | 67752260479   |
| 290 | 524.577897 | 23101257980   |
| 291 | 536.416610 | 23087918794   |
| 292 | 536.478999 | 34740434509   |
| 293 | 536.614118 | 2069444349700 |
| 294 | 536.772668 | 29292429510   |
| 295 | 536.827986 | 24694942137   |
| 296 | 536.845519 | 26601954765   |
| 297 | 536.943546 | 23163199930   |
| 298 | 537.170693 | 22677406703   |
| 299 | 537.617662 | 671327038809  |
| 300 | 538.621260 | 47029730447   |
| 301 | 541.243282 | 94632951955   |
| 302 | 541.826795 | 22649520767   |
| 303 | 542.246766 | 26295798578   |
| 304 | 543.240474 | 23225442726   |
| 305 | 543.258778 | 69927911144   |
| 306 | 546.511990 | 22346536215   |
| 307 | 547.826755 | 22549070928   |
| 308 | 550.542076 | 23786602894   |
| 309 | 550.630188 | 31845294758   |
| 310 | 552.609432 | 55892699131   |
| 311 | 556.591754 | 22636547506   |
| 312 | 557.238443 | 32396631643   |
| 313 | 557.281437 | 22348108523   |
| 314 | 564.645729 | 501764596220  |
| 315 | 565.649176 | 121022942598  |
| 316 | 578.377223 | 22799100949   |
| 317 | 585.233142 | 41586701405   |
| 318 | 586.236780 | 25544390849   |
| 319 | 587.248855 | 65326121778   |
| 320 | 588.252329 | 24031886724   |
| 321 | 589.246441 | 25787912976   |
| 322 | 592.039784 | 25077243354   |
| 323 | 592.677157 | 676070448349  |
| 324 | 593.680568 | 177007328804  |
| 325 | 603.141541 | 23466551194   |
| 326 | 611.746857 | 22605457205   |
| 327 | 612.389760 | 22290717105   |
| 328 | 613.429889 | 24178758561   |
| 329 | 616.168424 | 22282608655   |
| 330 | 620.709672 | 22682178868   |
| 331 | 625.408234 | 25882295396   |
| 332 | 637.345712 | 43486194089   |
| 333 | 640.628931 | 23309709516   |
| 334 | 659.618838 | 22374214284   |
| 335 | 676.714240 | 22743738262   |
| 336 | 685.437844 | 58142730452   |
| 337 | 686.441019 | 32294814588   |
| 338 | 688.832643 | 23065422669   |
| 339 | 705.384853 | 25136520726   |
| 340 | 706.895481 | 22829968305   |

---

## Mass Spectrum List Report

---

| #   | m/z        | I           |
|-----|------------|-------------|
| 341 | 712.890375 | 24885774145 |
| 342 | 714.308746 | 23014431952 |
| 343 | 726.105460 | 23268698340 |
| 344 | 741.613909 | 24262558512 |
| 345 | 754.022182 | 22882374832 |
| 346 | 788.564730 | 26616008388 |
| 347 | 801.272237 | 23597487927 |
| 348 | 838.491935 | 23002232872 |
| 349 | 882.401377 | 25475472226 |
| 350 | 908.887024 | 23331609920 |
| 351 | 944.924240 | 24054107493 |
| 352 | 977.164569 | 24921078109 |

AH-3-65 check

NAME AH-3-65  
EXPNO 50  
PROCNO 1  
Date\_ 20180201  
Time 14.00 h  
INSTRUM spect  
PROBHD z108618\_0161 (  
PULPROG zg30  
TD 65536  
SOLVENT CDCl3  
NS 16  
DS 2  
SWH 8012.820 Hz  
FIDRES 0.244532 Hz  
AQ 4.0894966 sec  
RG 144  
DW 62.400 usec  
DE 6.50 usec  
TE 298.2 K  
D1 1.00000000 sec  
TDO 1  
SFO1 400.1724710 MHz  
NUC1 1H  
P1 9.88 usec  
SI 65536  
SF 400.1700106 MHz  
WDW EM  
SSB 0  
LB 0.30 Hz  
GB 0  
PC 1.00

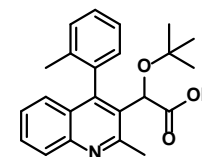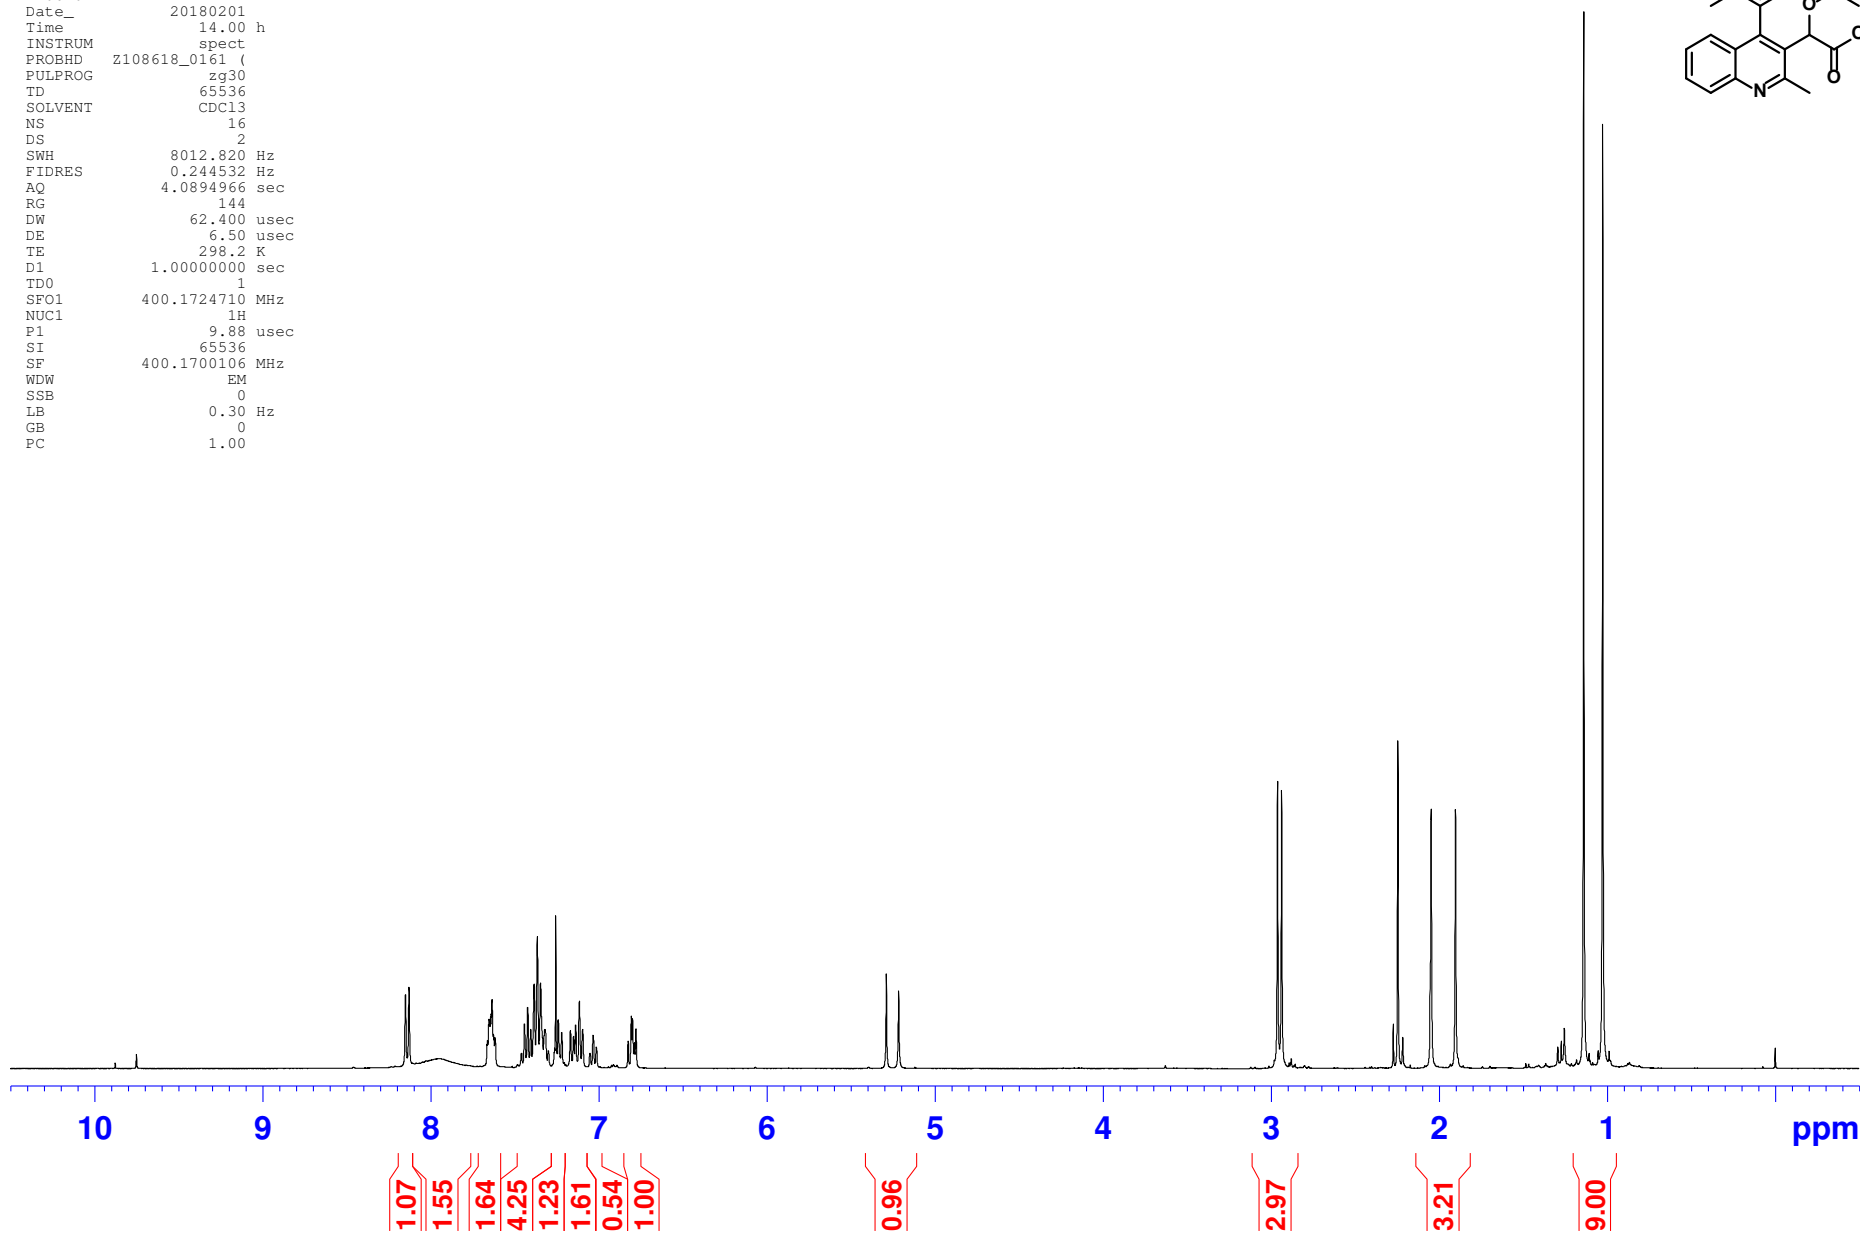



AH-3-65 Characterization (400MHz, CDCl3)

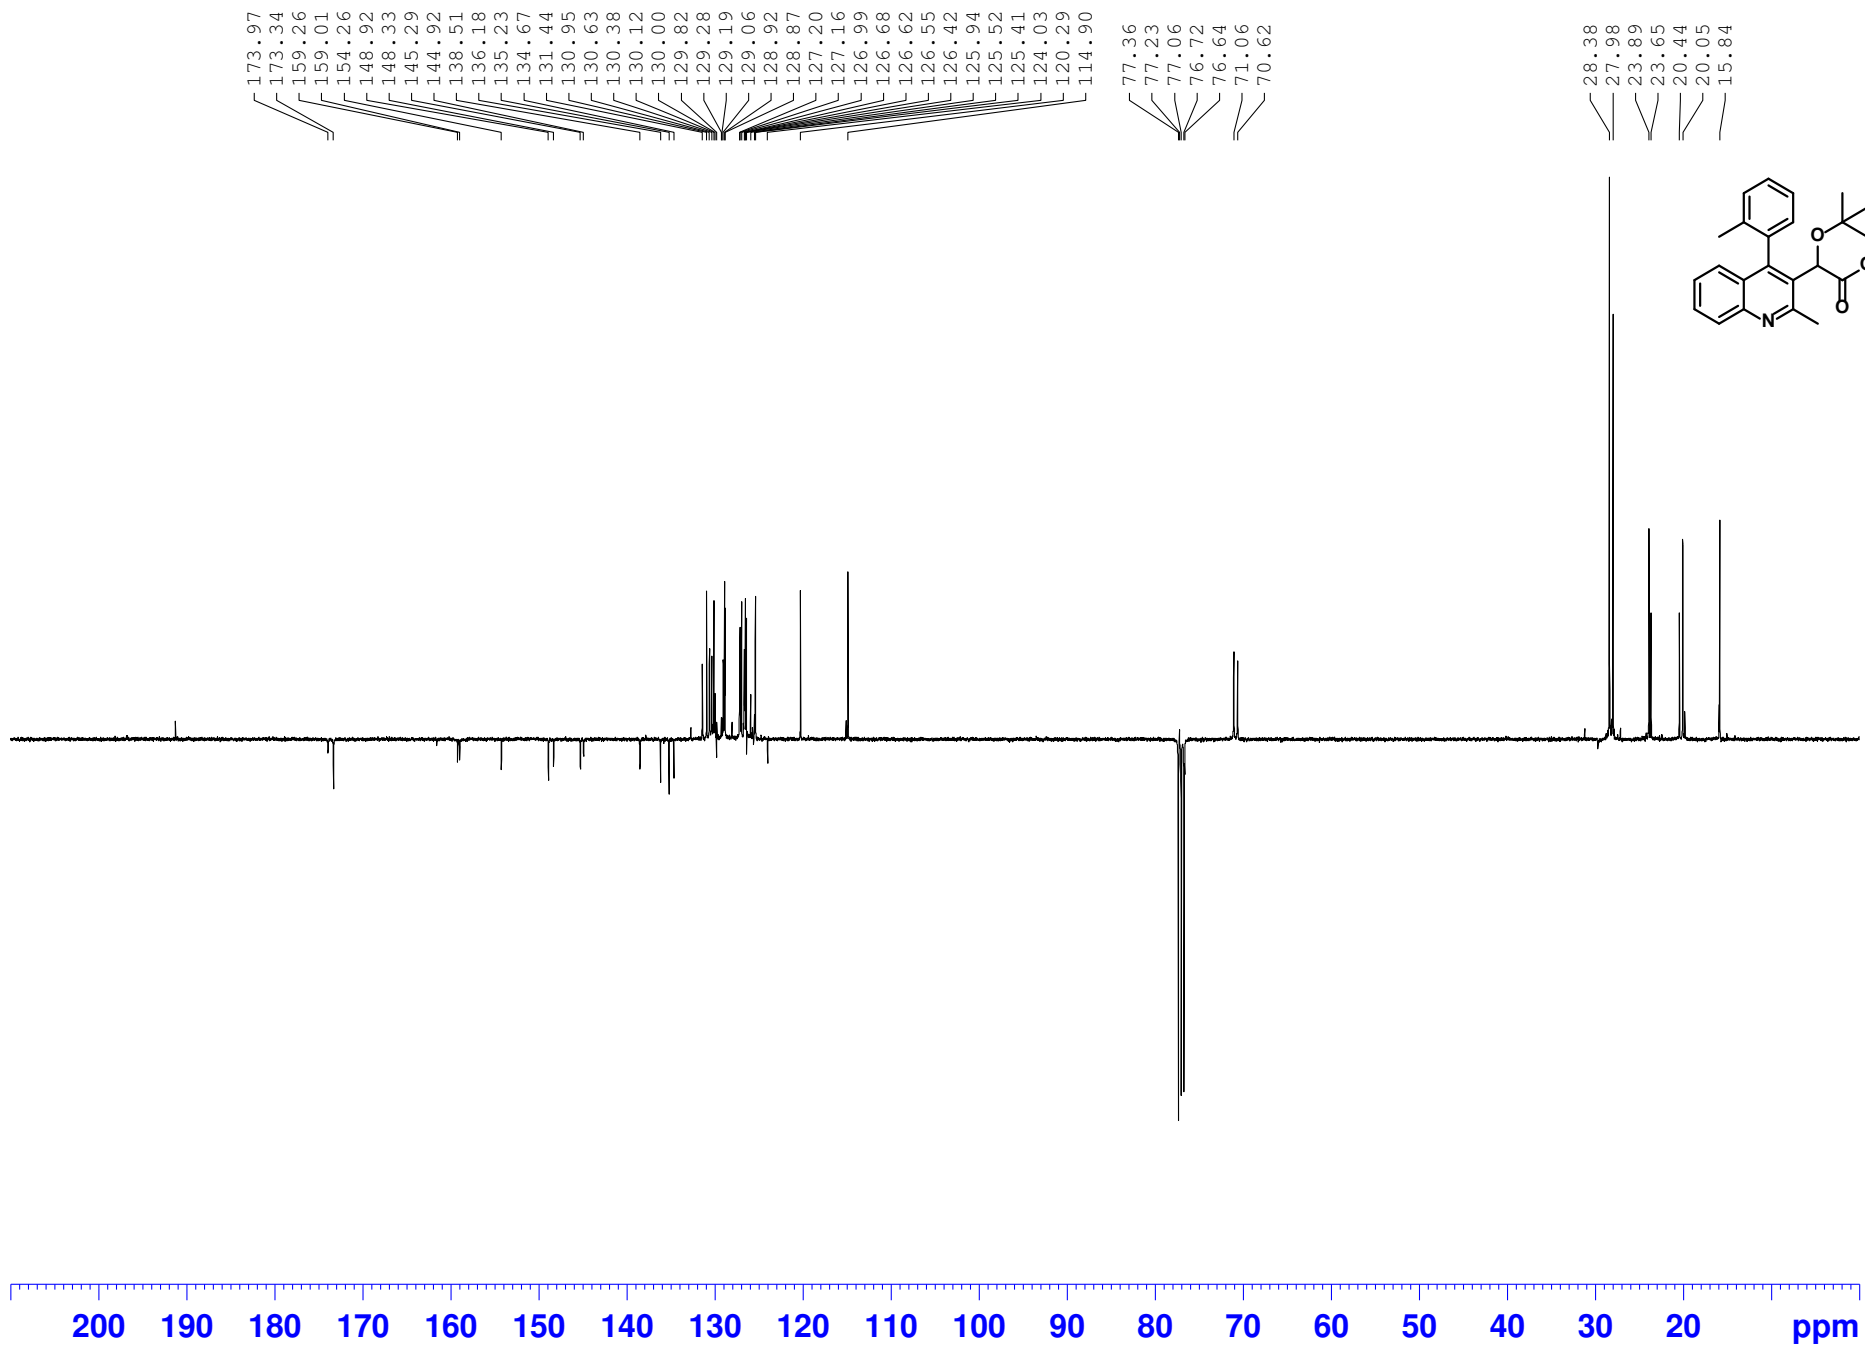

# Mass Spectrum List Report

## Analysis Info

Analysis Name F:\MS1-091514 - 080917\Data\apexdata031918\AH-3-65\_pos\_000002.d  
Method  
Sample Name AH-3-65  
Comment AH-3-65 in THF:MeOH C23H25NO3 H+

Acquisition Date 3/19/2018 9:43:41 AM  
Operator FTMS\_USER  
Instrument apex-Qe

Sample Name AH-3-65 in THF:MeOH  
Exact Mass of C23H25NO3 H+ = 364.190720 m/z  
Mass Observed = 364.191025 m/z  
Difference < 1.0 ppm

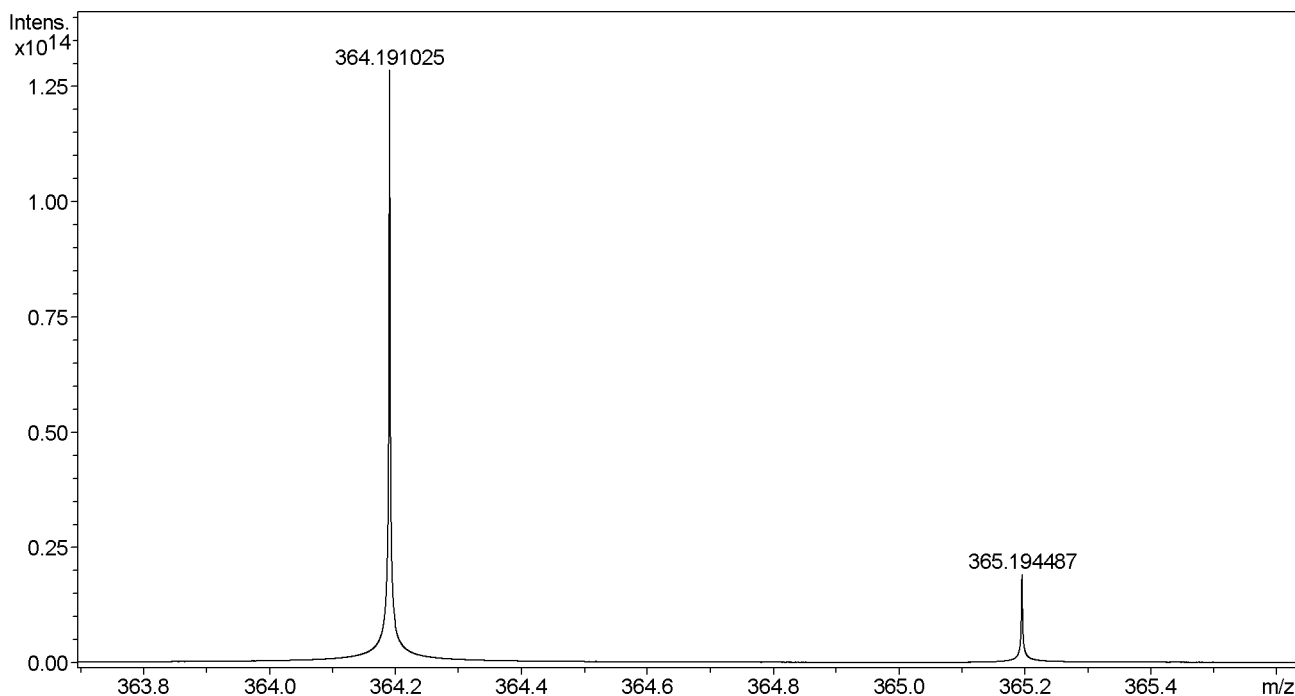

| #  | m/z        | I            |
|----|------------|--------------|
| 1  | 184.306043 | 21978299799  |
| 2  | 186.030892 | 58676003351  |
| 3  | 186.324250 | 22225608798  |
| 4  | 186.471797 | 21060399132  |
| 5  | 186.548566 | 22931871479  |
| 6  | 186.554612 | 375957479719 |
| 7  | 187.452079 | 22726901060  |
| 8  | 188.699159 | 22465502741  |
| 9  | 189.842582 | 24587087968  |
| 10 | 191.008613 | 23002706449  |
| 11 | 191.207568 | 21051216541  |
| 12 | 191.234748 | 24264376989  |
| 13 | 191.932762 | 22204137916  |
| 14 | 192.062276 | 23390771120  |
| 15 | 192.689408 | 21546576588  |
| 16 | 193.084083 | 25108646277  |
| 17 | 194.893525 | 23737982197  |
| 18 | 196.958319 | 21292823939  |
| 19 | 197.075428 | 22366146284  |
| 20 | 197.288018 | 21236938168  |

---

# Mass Spectrum List Report

---

| #  | m/z        | I            |
|----|------------|--------------|
| 21 | 200.570062 | 21199376818  |
| 22 | 202.077770 | 42214876964  |
| 23 | 202.340409 | 102275539844 |
| 24 | 202.626419 | 21031585650  |
| 25 | 202.709231 | 21896531930  |
| 26 | 202.727682 | 21898012273  |
| 27 | 203.822469 | 21227520059  |
| 28 | 207.258682 | 22077685604  |
| 29 | 209.441361 | 33237718843  |
| 30 | 212.831718 | 21476894183  |
| 31 | 214.089470 | 22744264885  |
| 32 | 214.660126 | 21673543570  |
| 33 | 217.084346 | 21237009247  |
| 34 | 217.088867 | 25278269365  |
| 35 | 218.096574 | 33120672560  |
| 36 | 218.550833 | 22668399095  |
| 37 | 221.272203 | 22301831202  |
| 38 | 224.351322 | 25112785773  |
| 39 | 228.081047 | 21395704151  |
| 40 | 230.096252 | 23580011495  |
| 41 | 231.099917 | 24735346966  |
| 42 | 231.104447 | 45042569667  |
| 43 | 232.075695 | 24192675982  |
| 44 | 232.112147 | 30463293063  |
| 45 | 233.083643 | 34398646343  |
| 46 | 233.882912 | 24692978073  |
| 47 | 241.088754 | 26707296570  |
| 48 | 242.096765 | 22535864882  |
| 49 | 243.104317 | 44268781090  |
| 50 | 244.112285 | 44585087259  |
| 51 | 245.120178 | 40208941040  |
| 52 | 246.127909 | 24482042992  |
| 53 | 247.648080 | 21523498488  |
| 54 | 248.106963 | 24597394405  |
| 55 | 249.280902 | 22037871744  |
| 56 | 252.270150 | 23399986519  |
| 57 | 253.387017 | 23765683621  |
| 58 | 255.102814 | 21563385538  |
| 59 | 257.144379 | 23936369822  |
| 60 | 259.742591 | 21965147771  |
| 61 | 260.107452 | 25811360601  |
| 62 | 261.110596 | 26521900641  |
| 63 | 261.115163 | 35489651065  |
| 64 | 261.409972 | 21657086209  |
| 65 | 262.122561 | 58454524920  |
| 66 | 266.297874 | 22111256379  |
| 67 | 267.465317 | 21658886328  |
| 68 | 269.320592 | 21917002785  |
| 69 | 275.798744 | 22661196141  |
| 70 | 276.101639 | 33080412891  |
| 71 | 277.105430 | 36563680814  |
| 72 | 281.356805 | 22651841384  |
| 73 | 282.467113 | 21571169848  |
| 74 | 286.224528 | 21737879689  |
| 75 | 286.898483 | 21459797812  |
| 76 | 287.180993 | 21421304642  |
| 77 | 287.783269 | 21895737254  |
| 78 | 296.045926 | 21671880461  |
| 79 | 296.921903 | 23882823491  |
| 80 | 300.136208 | 22917205089  |
| 81 | 304.215061 | 21548910948  |
| 82 | 304.902652 | 22195623980  |
| 83 | 306.112611 | 31556956519  |
| 84 | 308.128547 | 102610553518 |

---

# Mass Spectrum List Report

---

| #   | m/z        | I             |
|-----|------------|---------------|
| 85  | 309.131723 | 49096951730   |
| 86  | 312.100019 | 1245230410565 |
| 87  | 313.103479 | 98647623726   |
| 88  | 319.726110 | 24894803300   |
| 89  | 320.201446 | 705427166352  |
| 90  | 320.227856 | 23842999117   |
| 91  | 321.204960 | 66253828389   |
| 92  | 332.446694 | 26884838818   |
| 93  | 345.775562 | 27635760323   |
| 94  | 347.584901 | 75006576194   |
| 95  | 352.191551 | 52576972402   |
| 96  | 356.217875 | 32895088671   |
| 97  | 358.708055 | 29513609926   |
| 98  | 358.774101 | 30461096236   |
| 99  | 358.852229 | 30264342350   |
| 100 | 358.886314 | 31044795623   |
| 101 | 358.916648 | 29355780414   |
| 102 | 359.050717 | 30945402137   |
| 103 | 359.199163 | 30468672565   |
| 104 | 359.296659 | 33644010030   |
| 105 | 359.334797 | 31341306608   |
| 106 | 359.417358 | 31183946909   |
| 107 | 359.430047 | 31521393320   |
| 108 | 359.551728 | 34395185670   |
| 109 | 359.595207 | 32981826990   |
| 110 | 359.685968 | 30832524948   |
| 111 | 359.775487 | 33854928798   |
| 112 | 359.858308 | 33341699243   |
| 113 | 359.916924 | 32717717450   |
| 114 | 359.965212 | 29901834432   |
| 115 | 360.030415 | 35995169720   |
| 116 | 360.090002 | 32273856787   |
| 117 | 360.129653 | 31530119301   |
| 118 | 360.149690 | 30458855102   |
| 119 | 360.214981 | 33887841883   |
| 120 | 360.231711 | 36120692690   |
| 121 | 360.375941 | 39607458573   |
| 122 | 360.495970 | 37897404498   |
| 123 | 360.550707 | 37156925309   |
| 124 | 360.607325 | 33094973962   |
| 125 | 360.709855 | 36368940897   |
| 126 | 360.770909 | 36634128340   |
| 127 | 360.808502 | 36258793248   |
| 128 | 360.851900 | 35588103115   |
| 129 | 360.878496 | 33602824982   |
| 130 | 360.898310 | 36273446588   |
| 131 | 360.935856 | 38147155937   |
| 132 | 360.965526 | 37729604047   |
| 133 | 360.975179 | 40255890363   |
| 134 | 361.015423 | 42453801618   |
| 135 | 361.032457 | 36465446982   |
| 136 | 361.103639 | 43838861168   |
| 137 | 361.162221 | 40516173098   |
| 138 | 361.200152 | 42149926584   |
| 139 | 361.281829 | 36851622136   |
| 140 | 361.305110 | 43252931539   |
| 141 | 361.333059 | 45812630761   |
| 142 | 361.454018 | 42904383676   |
| 143 | 361.483650 | 47607735729   |
| 144 | 361.614273 | 46982897218   |
| 145 | 361.631329 | 47633426475   |
| 146 | 361.740465 | 51528565502   |
| 147 | 361.772854 | 46620841666   |
| 148 | 361.788985 | 46602433367   |

# Mass Spectrum List Report

| #   | m/z        | I               |
|-----|------------|-----------------|
| 149 | 361.810117 | 49324579882     |
| 150 | 361.892457 | 53353232551     |
| 151 | 361.953818 | 54307939576     |
| 152 | 362.053079 | 53796821860     |
| 153 | 362.103380 | 51670578924     |
| 154 | 362.127915 | 57789420344     |
| 155 | 362.161627 | 57976904391     |
| 156 | 362.233874 | 56096201457     |
| 157 | 362.261958 | 58761547564     |
| 158 | 362.310071 | 57508294247     |
| 159 | 362.385794 | 62284404123     |
| 160 | 362.399653 | 60133495546     |
| 161 | 362.502702 | 59805284603     |
| 162 | 362.536833 | 64831258585     |
| 163 | 362.626163 | 63822763597     |
| 164 | 362.649180 | 67389606658     |
| 165 | 362.695279 | 67913574147     |
| 166 | 362.736316 | 67592534542     |
| 167 | 362.811044 | 70445267676     |
| 168 | 362.919686 | 84495244912     |
| 169 | 363.007134 | 79582214944     |
| 170 | 363.038026 | 83653400431     |
| 171 | 363.058861 | 84907133416     |
| 172 | 363.101696 | 92951158592     |
| 173 | 363.193798 | 105503576085    |
| 174 | 363.262342 | 108165980448    |
| 175 | 363.307295 | 115503890077    |
| 176 | 363.423550 | 120500263067    |
| 177 | 363.530545 | 142198434119    |
| 178 | 363.567103 | 146981897021    |
| 179 | 363.726058 | 186383457705    |
| 180 | 364.191025 | 128318775074238 |
| 181 | 364.634721 | 175777213199    |
| 182 | 364.680190 | 161816672737    |
| 183 | 364.737369 | 137436357773    |
| 184 | 364.785148 | 122390796080    |
| 185 | 364.851709 | 107088681908    |
| 186 | 364.966784 | 84013891784     |
| 187 | 365.020598 | 74328814328     |
| 188 | 365.194487 | 19162243389994  |
| 189 | 365.433805 | 121601749677    |
| 190 | 365.539107 | 100611768048    |
| 191 | 365.760125 | 76829062007     |
| 192 | 365.890805 | 70000390748     |
| 193 | 366.065853 | 64378116328     |
| 194 | 366.198030 | 1141288170574   |
| 195 | 366.315494 | 63703906651     |
| 196 | 366.333143 | 56780173323     |
| 197 | 366.354198 | 61487285141     |
| 198 | 366.380363 | 60774151549     |
| 199 | 366.423648 | 57345891895     |
| 200 | 366.444506 | 56899757221     |
| 201 | 366.491294 | 54149467381     |
| 202 | 366.523510 | 58181531062     |
| 203 | 366.590731 | 54130386642     |
| 204 | 366.614245 | 57204771088     |
| 205 | 366.737178 | 52405022586     |
| 206 | 366.778950 | 50077437846     |
| 207 | 366.795809 | 51850372742     |
| 208 | 366.830037 | 46444045912     |
| 209 | 366.867006 | 46247953254     |
| 210 | 366.918222 | 42973934753     |
| 211 | 366.967390 | 46397324725     |
| 212 | 367.068348 | 45955781840     |

---

# Mass Spectrum List Report

---

| #   | m/z        | I             |
|-----|------------|---------------|
| 213 | 367.098344 | 45971378357   |
| 214 | 367.238058 | 41882674006   |
| 215 | 367.344111 | 40693506405   |
| 216 | 367.373125 | 43599077980   |
| 217 | 367.403464 | 41260190589   |
| 218 | 367.656271 | 39482121119   |
| 219 | 367.728965 | 39779789689   |
| 220 | 367.816770 | 37490335545   |
| 221 | 367.867219 | 41921444553   |
| 222 | 367.897575 | 36487726353   |
| 223 | 367.953774 | 38029706242   |
| 224 | 368.003512 | 36242425926   |
| 225 | 368.047567 | 34305989590   |
| 226 | 368.113985 | 38434654775   |
| 227 | 368.129898 | 32596060846   |
| 228 | 368.154627 | 33701236629   |
| 229 | 368.235037 | 37577194390   |
| 230 | 368.277579 | 32670940513   |
| 231 | 368.336532 | 39151033416   |
| 232 | 368.340530 | 34254345876   |
| 233 | 368.362935 | 32680279531   |
| 234 | 368.399026 | 32705645069   |
| 235 | 368.458083 | 33519385657   |
| 236 | 368.572632 | 32812404721   |
| 237 | 368.582046 | 31693417050   |
| 238 | 368.612132 | 30674704943   |
| 239 | 368.710719 | 33529677284   |
| 240 | 368.736090 | 32767532214   |
| 241 | 368.913231 | 38288960038   |
| 242 | 368.935045 | 32143259008   |
| 243 | 369.065041 | 31740560839   |
| 244 | 369.185352 | 31958830918   |
| 245 | 369.426516 | 32759216254   |
| 246 | 369.509759 | 32022310628   |
| 247 | 369.550938 | 32005165234   |
| 248 | 369.689440 | 30565427605   |
| 249 | 369.740384 | 30968491036   |
| 250 | 369.883020 | 31732674570   |
| 251 | 369.937802 | 31183616556   |
| 252 | 370.168989 | 32271715657   |
| 253 | 370.877876 | 30637389183   |
| 254 | 379.181149 | 171554237522  |
| 255 | 382.463635 | 2776691373759 |
| 256 | 382.522911 | 32750815820   |
| 257 | 382.541690 | 30849754856   |
| 258 | 386.173437 | 271239973958  |
| 259 | 392.221723 | 266378659756  |
| 260 | 392.222997 | 298406218384  |
| 261 | 393.226319 | 37652155298   |
| 262 | 393.297077 | 28131758741   |
| 263 | 398.242655 | 28350173488   |
| 264 | 408.155040 | 613581661928  |
| 265 | 409.157872 | 136338880414  |
| 266 | 413.962374 | 25704931185   |
| 267 | 433.812050 | 24154213368   |
| 268 | 434.240225 | 21981792238   |
| 269 | 435.345850 | 30139801308   |
| 270 | 446.823763 | 23298748488   |
| 271 | 453.407813 | 24040718472   |
| 272 | 459.169281 | 25219786330   |
| 273 | 466.002927 | 21561398751   |
| 274 | 466.917375 | 23375145794   |
| 275 | 469.002188 | 21773708847   |
| 276 | 470.622951 | 21683821093   |

---

## Mass Spectrum List Report

---

| #   | m/z        | I            |
|-----|------------|--------------|
| 277 | 481.255576 | 24146825663  |
| 278 | 482.841934 | 24070889624  |
| 279 | 492.150487 | 22553747177  |
| 280 | 495.104376 | 24056871073  |
| 281 | 508.583041 | 56419807690  |
| 282 | 512.056631 | 22611367787  |
| 283 | 536.614493 | 276463409995 |
| 284 | 537.617868 | 66792221494  |
| 285 | 547.409132 | 22477178982  |
| 286 | 552.609381 | 101273217836 |
| 287 | 564.646179 | 44737410131  |
| 288 | 580.640942 | 23563708494  |
| 289 | 586.507549 | 22622412217  |
| 290 | 590.056753 | 23422650138  |
| 291 | 592.677569 | 57575363290  |
| 292 | 599.550605 | 26296640843  |
| 293 | 608.671496 | 22837182384  |
| 294 | 617.864250 | 22681847634  |
| 295 | 622.116809 | 22316707050  |
| 296 | 651.318567 | 22726769408  |
| 297 | 662.696942 | 22841617637  |
| 298 | 685.438189 | 46853537652  |
| 299 | 698.811431 | 23071045328  |
| 300 | 703.985657 | 22826293235  |
| 301 | 708.531530 | 23802700574  |
| 302 | 735.765403 | 22594866131  |
| 303 | 752.557990 | 22941643724  |
| 304 | 768.703325 | 22662436896  |
| 305 | 789.240335 | 23579255079  |
| 306 | 801.922828 | 23629654236  |
| 307 | 834.657505 | 23122858899  |
| 308 | 903.276854 | 23472525880  |
| 309 | 940.284723 | 25498285499  |
| 310 | 995.321400 | 23921244015  |

AH-3-69 check

NAME AH-3-69  
EXPNO 60  
PROCNO 1  
Date\_ 20180201  
Time 14.12 h  
INSTRUM spect  
PROBHD z108618\_0161 (  
PULPROG zg30  
TD 65536  
SOLVENT CDC13  
NS 16  
DS 2  
SWH 8012.820 Hz  
FIDRES 0.244532 Hz  
AQ 4.0894966 sec  
RG 161  
DW 62.400 usec  
DE 6.50 usec  
TE 298.1 K  
D1 1.00000000 sec  
TDO 1  
SFO1 400.1724710 MHz  
NUC1 1H  
P1 9.88 usec  
SI 65536  
SF 400.1700072 MHz  
WDW EM  
SSB 0  
LB 0.30 Hz  
GB 0  
PC 1.00

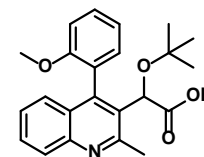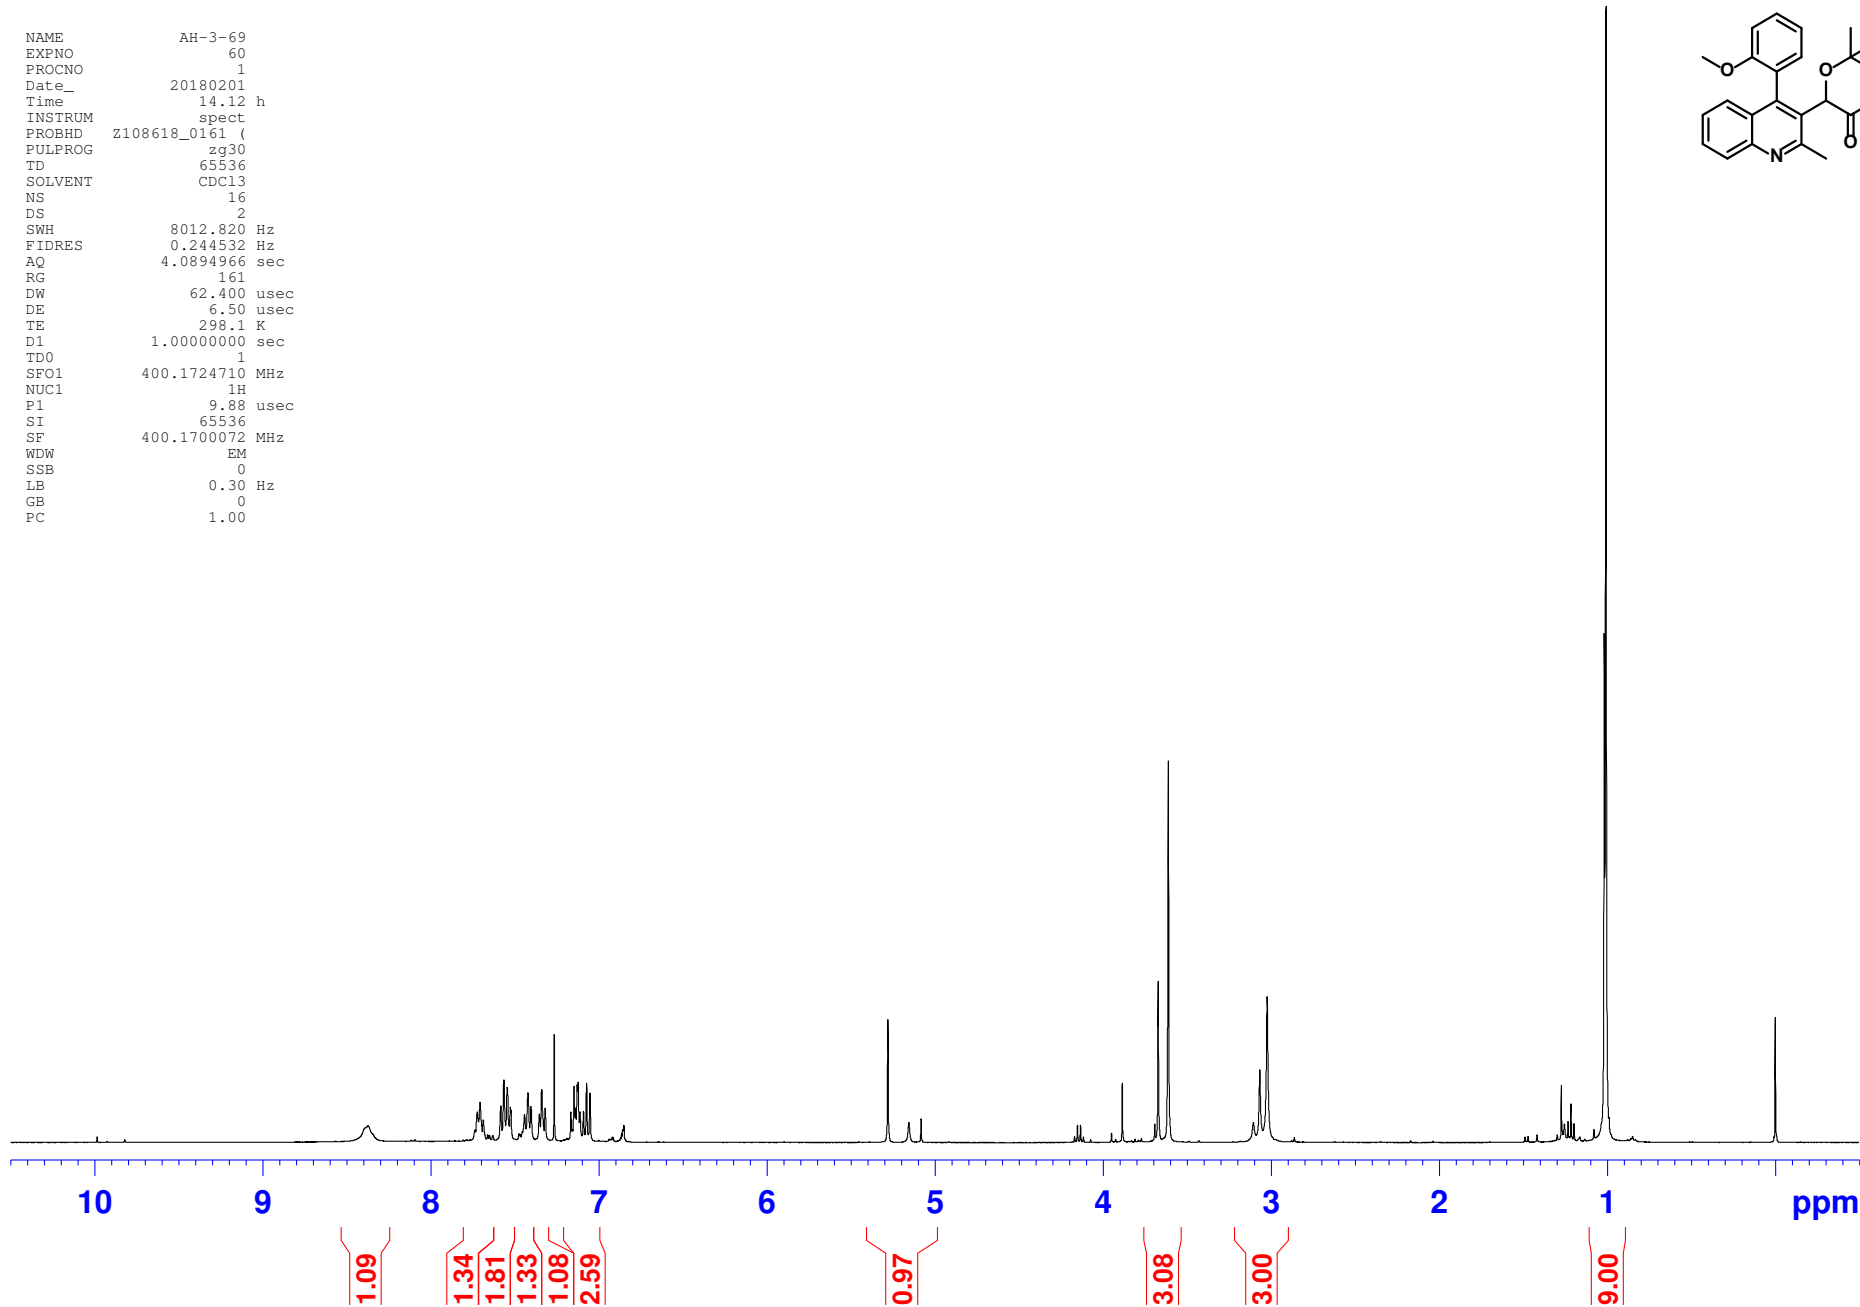



AH-3-69 Characterization

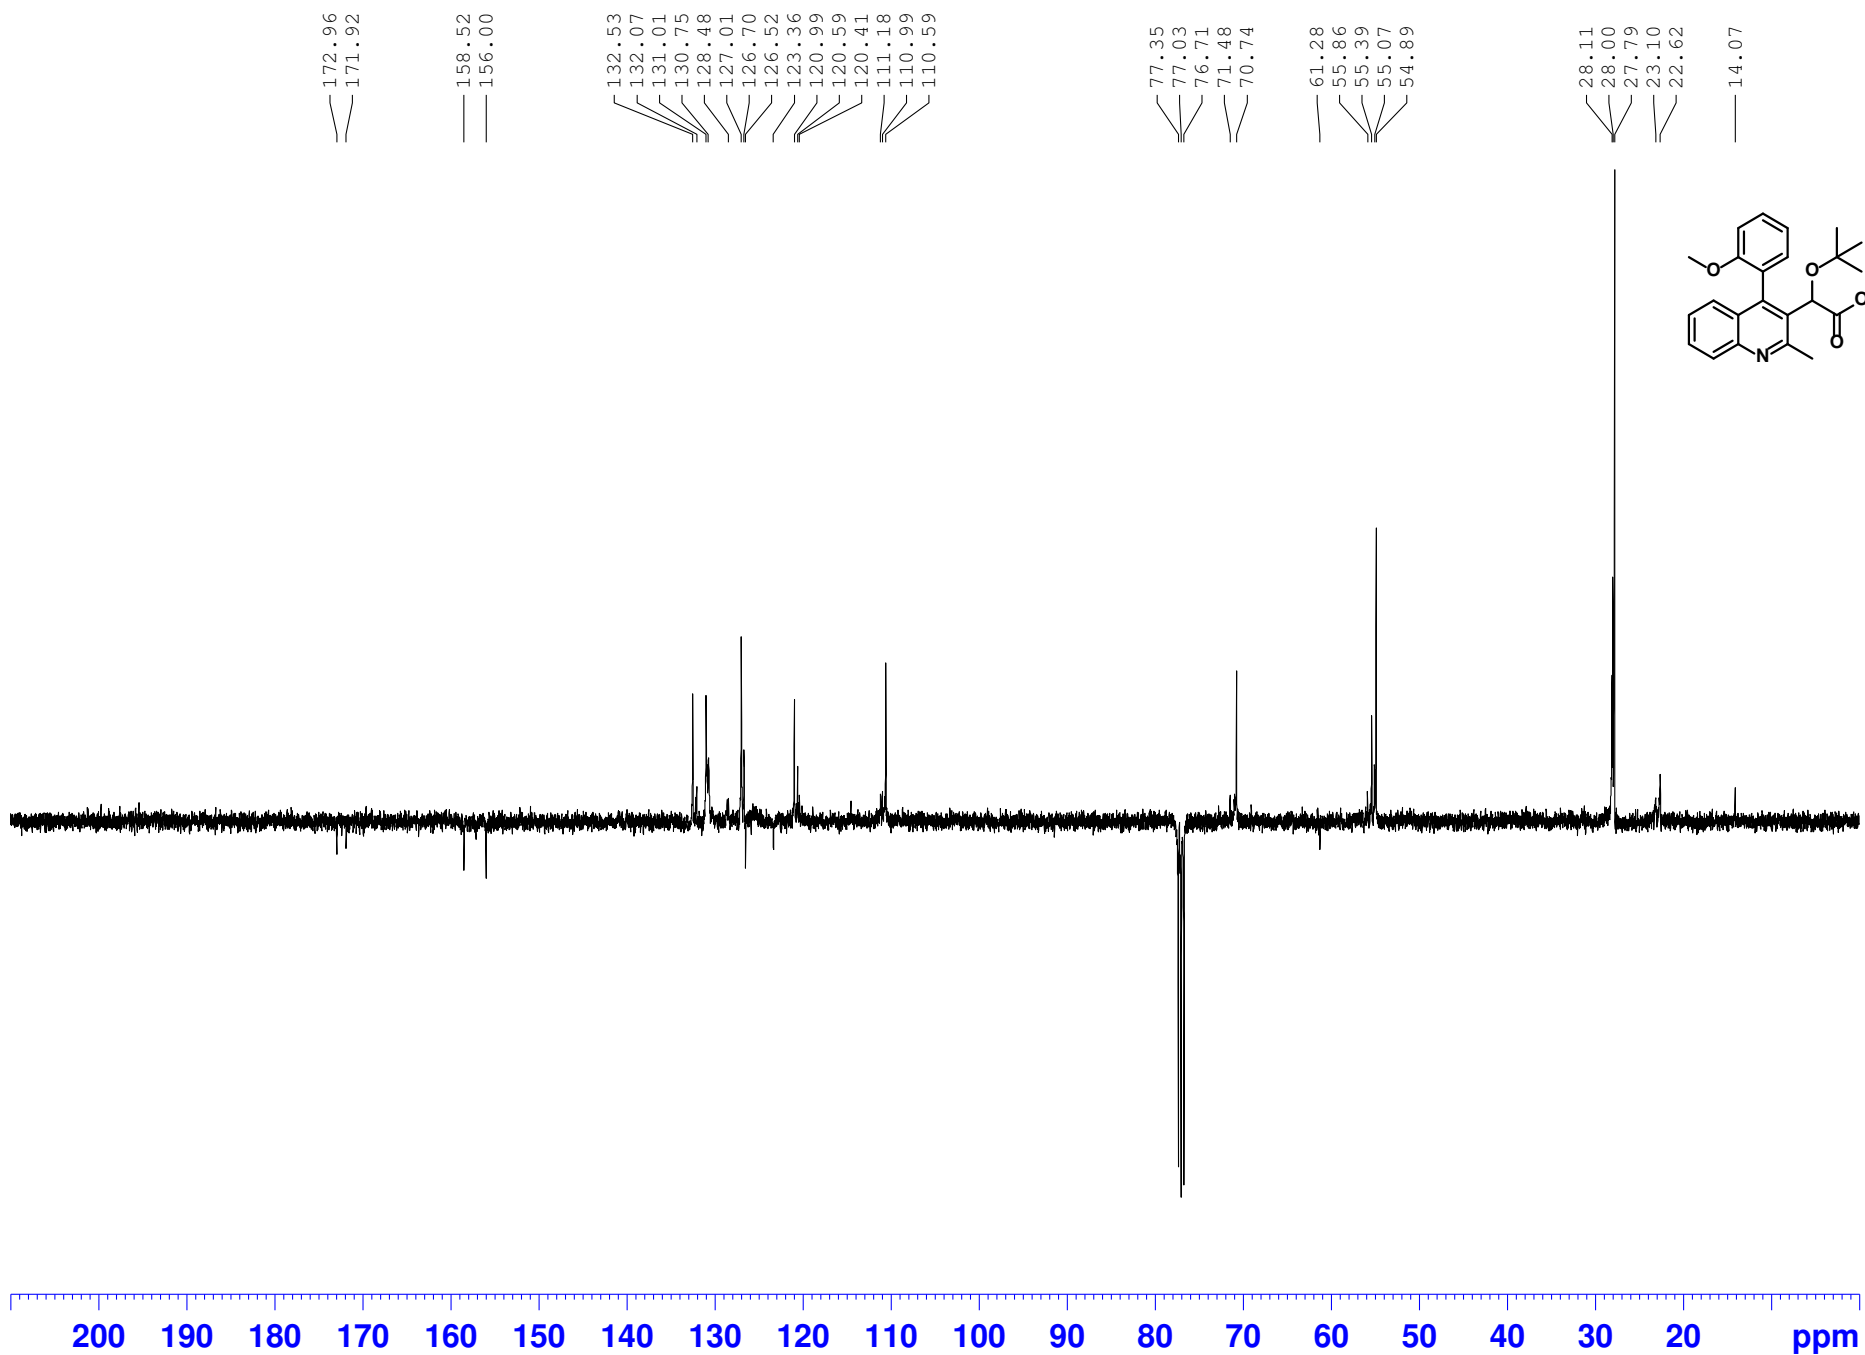

# Mass Spectrum List Report

## Analysis Info

Analysis Name F:\MS1-091514 - 080917\Data\apexdata031918\AH-3-69\_pos\_000001.d  
Method  
Sample Name AH-3-69  
Comment AH-3-69 in THF:MeOH C23H25NO4 H+

Acquisition Date 3/19/2018 11:03:36 AM  
Operator FTMS\_USER  
Instrument apex-Qe

Sample Name AH-3-69 in THF:MeOH  
Exact Mass of C23H25NO4 H+ = 380.185635 m/z  
Mass Observed = 380.185964 m/z  
Difference < 1.0 ppm

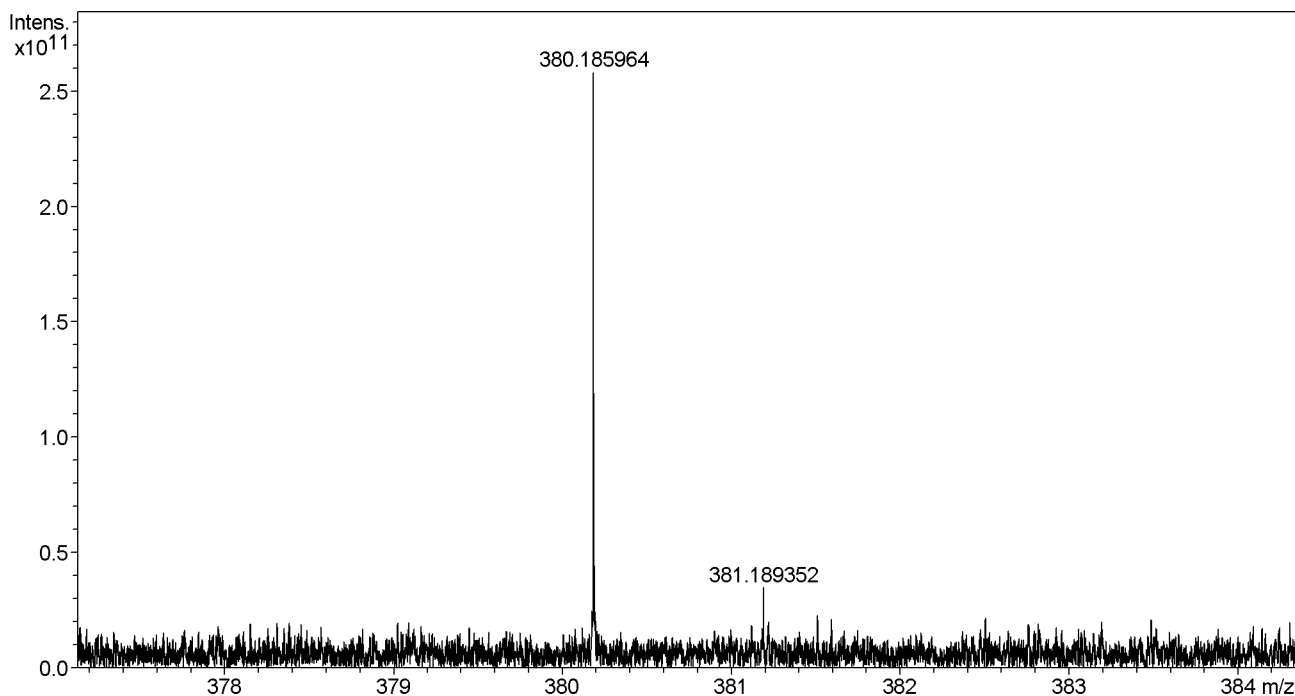

| #  | m/z        | I           |
|----|------------|-------------|
| 1  | 184.752971 | 21702234487 |
| 2  | 185.245744 | 23768222291 |
| 3  | 186.670138 | 21197396856 |
| 4  | 190.061872 | 42694681854 |
| 5  | 190.827591 | 21169879643 |
| 6  | 194.402918 | 21195028048 |
| 7  | 195.516466 | 21714454504 |
| 8  | 196.168145 | 22064962784 |
| 9  | 200.887880 | 21979833241 |
| 10 | 202.340499 | 73287724334 |
| 11 | 205.007992 | 21493470887 |
| 12 | 209.441961 | 78756666634 |
| 13 | 210.175949 | 21242427072 |
| 14 | 211.315724 | 21447708080 |
| 15 | 212.164690 | 23097491192 |
| 16 | 212.818399 | 21146873138 |
| 17 | 215.089118 | 43547569299 |
| 18 | 215.260669 | 24411469706 |
| 19 | 217.979644 | 21423186154 |
| 20 | 218.110773 | 22485773696 |

---

# Mass Spectrum List Report

---

| #  | m/z        | I           |
|----|------------|-------------|
| 21 | 219.258142 | 21974602777 |
| 22 | 219.358867 | 21827253764 |
| 23 | 219.431224 | 21159683513 |
| 24 | 219.557001 | 21858646364 |
| 25 | 220.578842 | 22568043269 |
| 26 | 222.594386 | 21082504079 |
| 27 | 229.291309 | 24271262722 |
| 28 | 231.120459 | 30195849628 |
| 29 | 231.633470 | 21162924561 |
| 30 | 233.753430 | 21547281708 |
| 31 | 234.217144 | 22497463089 |
| 32 | 238.967491 | 25199307974 |
| 33 | 239.676444 | 24229581990 |
| 34 | 242.309649 | 25352909386 |
| 35 | 245.302515 | 22739119191 |
| 36 | 247.171777 | 28768850135 |
| 37 | 248.435296 | 21329401768 |
| 38 | 250.869054 | 22768638939 |
| 39 | 251.318680 | 23575205342 |
| 40 | 254.296837 | 21955632261 |
| 41 | 255.592993 | 21805814701 |
| 42 | 256.091987 | 21915431051 |
| 43 | 257.142145 | 23587418587 |
| 44 | 258.167653 | 21586976011 |
| 45 | 258.184467 | 21656070252 |
| 46 | 258.196846 | 22201212859 |
| 47 | 263.343427 | 21576629867 |
| 48 | 270.997670 | 22350395722 |
| 49 | 279.632880 | 21950132502 |
| 50 | 279.854338 | 21566345852 |
| 51 | 280.138346 | 23679491289 |
| 52 | 281.800682 | 21407326196 |
| 53 | 283.563640 | 42914152583 |
| 54 | 284.850162 | 23613717002 |
| 55 | 286.676534 | 21612446912 |
| 56 | 287.310616 | 23904593053 |
| 57 | 292.082232 | 23695839839 |
| 58 | 293.319920 | 21958695314 |
| 59 | 294.611302 | 21960783834 |
| 60 | 296.331211 | 21970262709 |
| 61 | 296.596886 | 23844130773 |
| 62 | 298.012916 | 22224754993 |
| 63 | 302.466868 | 23583058826 |
| 64 | 304.732129 | 24653331443 |
| 65 | 313.380143 | 22048862023 |
| 66 | 315.670593 | 22324397333 |
| 67 | 317.412359 | 24917329056 |
| 68 | 317.641074 | 21877786160 |
| 69 | 319.431644 | 21977473240 |
| 70 | 326.762210 | 22565083474 |
| 71 | 331.980930 | 22209478091 |
| 72 | 333.326203 | 23409986654 |
| 73 | 335.995047 | 24192906083 |
| 74 | 336.196084 | 48361979973 |
| 75 | 342.764055 | 22419801682 |
| 76 | 343.138638 | 25365030373 |
| 77 | 351.989907 | 22757175885 |
| 78 | 354.409720 | 27378943456 |
| 79 | 358.907673 | 24596716252 |
| 80 | 359.146369 | 25703028106 |
| 81 | 360.323985 | 39725428268 |
| 82 | 362.580200 | 22879089047 |
| 83 | 363.469046 | 22054375226 |
| 84 | 368.345731 | 24896099448 |

---

# Mass Spectrum List Report

---

| #   | m/z        | I             |
|-----|------------|---------------|
| 85  | 372.145862 | 22013431105   |
| 86  | 380.185964 | 257986453495  |
| 87  | 381.189352 | 34687247938   |
| 88  | 381.510631 | 22542159256   |
| 89  | 389.676419 | 22607178194   |
| 90  | 398.241769 | 311775984046  |
| 91  | 398.271802 | 23433622384   |
| 92  | 399.245120 | 60381481962   |
| 93  | 407.864135 | 27626846076   |
| 94  | 408.217250 | 50715203800   |
| 95  | 412.655017 | 22038708995   |
| 96  | 414.688173 | 22375428924   |
| 97  | 416.847809 | 22590357030   |
| 98  | 419.926361 | 22393563900   |
| 99  | 420.245824 | 22587194714   |
| 100 | 425.287760 | 47241188421   |
| 101 | 431.330408 | 23392072230   |
| 102 | 432.878693 | 23418351633   |
| 103 | 435.344998 | 64743947254   |
| 104 | 440.149355 | 23460172041   |
| 105 | 454.562292 | 22399354027   |
| 106 | 462.637926 | 23355735284   |
| 107 | 466.384572 | 25633955282   |
| 108 | 474.376013 | 22627548924   |
| 109 | 480.550666 | 38947195367   |
| 110 | 480.966115 | 24215788109   |
| 111 | 481.350651 | 23174539154   |
| 112 | 488.996439 | 22965870866   |
| 113 | 493.175509 | 52466219896   |
| 114 | 502.480420 | 22642356998   |
| 115 | 508.582025 | 343430014521  |
| 116 | 509.585343 | 100569868536  |
| 117 | 510.589176 | 28594536926   |
| 118 | 511.054899 | 23211811541   |
| 119 | 512.443497 | 25075984451   |
| 120 | 516.164517 | 22755045207   |
| 121 | 522.597721 | 26293165106   |
| 122 | 523.142832 | 29665219662   |
| 123 | 523.432893 | 23320022456   |
| 124 | 525.139939 | 28392062196   |
| 125 | 526.380428 | 23269804197   |
| 126 | 536.513291 | 29290333902   |
| 127 | 536.613246 | 1335173227924 |
| 128 | 536.702238 | 34956790097   |
| 129 | 536.793268 | 24490403251   |
| 130 | 537.518891 | 23030269455   |
| 131 | 537.616719 | 418600019250  |
| 132 | 538.620268 | 65636237648   |
| 133 | 548.940299 | 22380363229   |
| 134 | 550.592862 | 33722296854   |
| 135 | 550.629273 | 26895989322   |
| 136 | 552.608160 | 93624029437   |
| 137 | 553.611775 | 41616515601   |
| 138 | 564.644714 | 392139349086  |
| 139 | 565.648225 | 135478791597  |
| 140 | 566.651371 | 33822945170   |
| 141 | 569.403036 | 56655760733   |
| 142 | 580.549903 | 23753149920   |
| 143 | 580.640148 | 23917094012   |
| 144 | 580.871731 | 22443706203   |
| 145 | 592.676031 | 504346981882  |
| 146 | 592.743789 | 27181208187   |
| 147 | 593.679393 | 188130209747  |
| 148 | 599.548940 | 74003614636   |

---

## Mass Spectrum List Report

---

| #   | m/z        | I           |
|-----|------------|-------------|
| 149 | 600.551933 | 33198559760 |
| 150 | 606.654957 | 24476955996 |
| 151 | 608.671060 | 27161662521 |
| 152 | 609.674135 | 23338339935 |
| 153 | 610.041402 | 23032666200 |
| 154 | 613.429131 | 27985422320 |
| 155 | 620.707548 | 24229764582 |
| 156 | 630.794954 | 23724352093 |
| 157 | 637.135188 | 22451756524 |
| 158 | 637.622212 | 22554241861 |
| 159 | 653.447346 | 22581780360 |
| 160 | 657.455394 | 61772398617 |
| 161 | 658.459009 | 28154601936 |
| 162 | 677.381019 | 25725699585 |
| 163 | 685.436066 | 35274515176 |
| 164 | 701.481400 | 29031077802 |
| 165 | 715.173181 | 23590959712 |
| 166 | 715.852644 | 23304615715 |
| 167 | 717.757824 | 25370842126 |
| 168 | 732.889120 | 24693909911 |
| 169 | 756.797061 | 23073824187 |
| 170 | 771.841263 | 26251503103 |
| 171 | 795.347345 | 24491839658 |
| 172 | 837.362994 | 23791603508 |
| 173 | 857.775843 | 23408919615 |
| 174 | 866.448985 | 23432749952 |
| 175 | 877.536018 | 36394563048 |
| 176 | 878.540573 | 23304382275 |
| 177 | 923.046175 | 24066128695 |

# AH-3-68 Characterization

NAME AH-3-68  
EXPNO 40  
PROCNO 1  
Date\_ 20180123  
Time\_ 18.38 h  
INSTRUM spect  
PROBHD Z108618\_0161 (  
PULPROG zg30  
TD 65536  
SOLVENT CDCl3  
NS 16  
DS 2  
SWH 8012.820 Hz  
FIDRES 0.244532 Hz  
AQ 4.0894966 sec  
RG 203  
DW 62.400 usec  
DE 6.50 usec  
TE 298.2 K  
D1 1.00000000 sec  
TD0 1  
SF01 400.1724710 MHz  
NUC1 1H  
P1 9.88 usec  
SI 65536  
SF 400.1700092 MHz  
WDW EM  
SSB 0  
LB 0.30 Hz  
GB 0  
PC 1.00

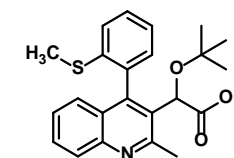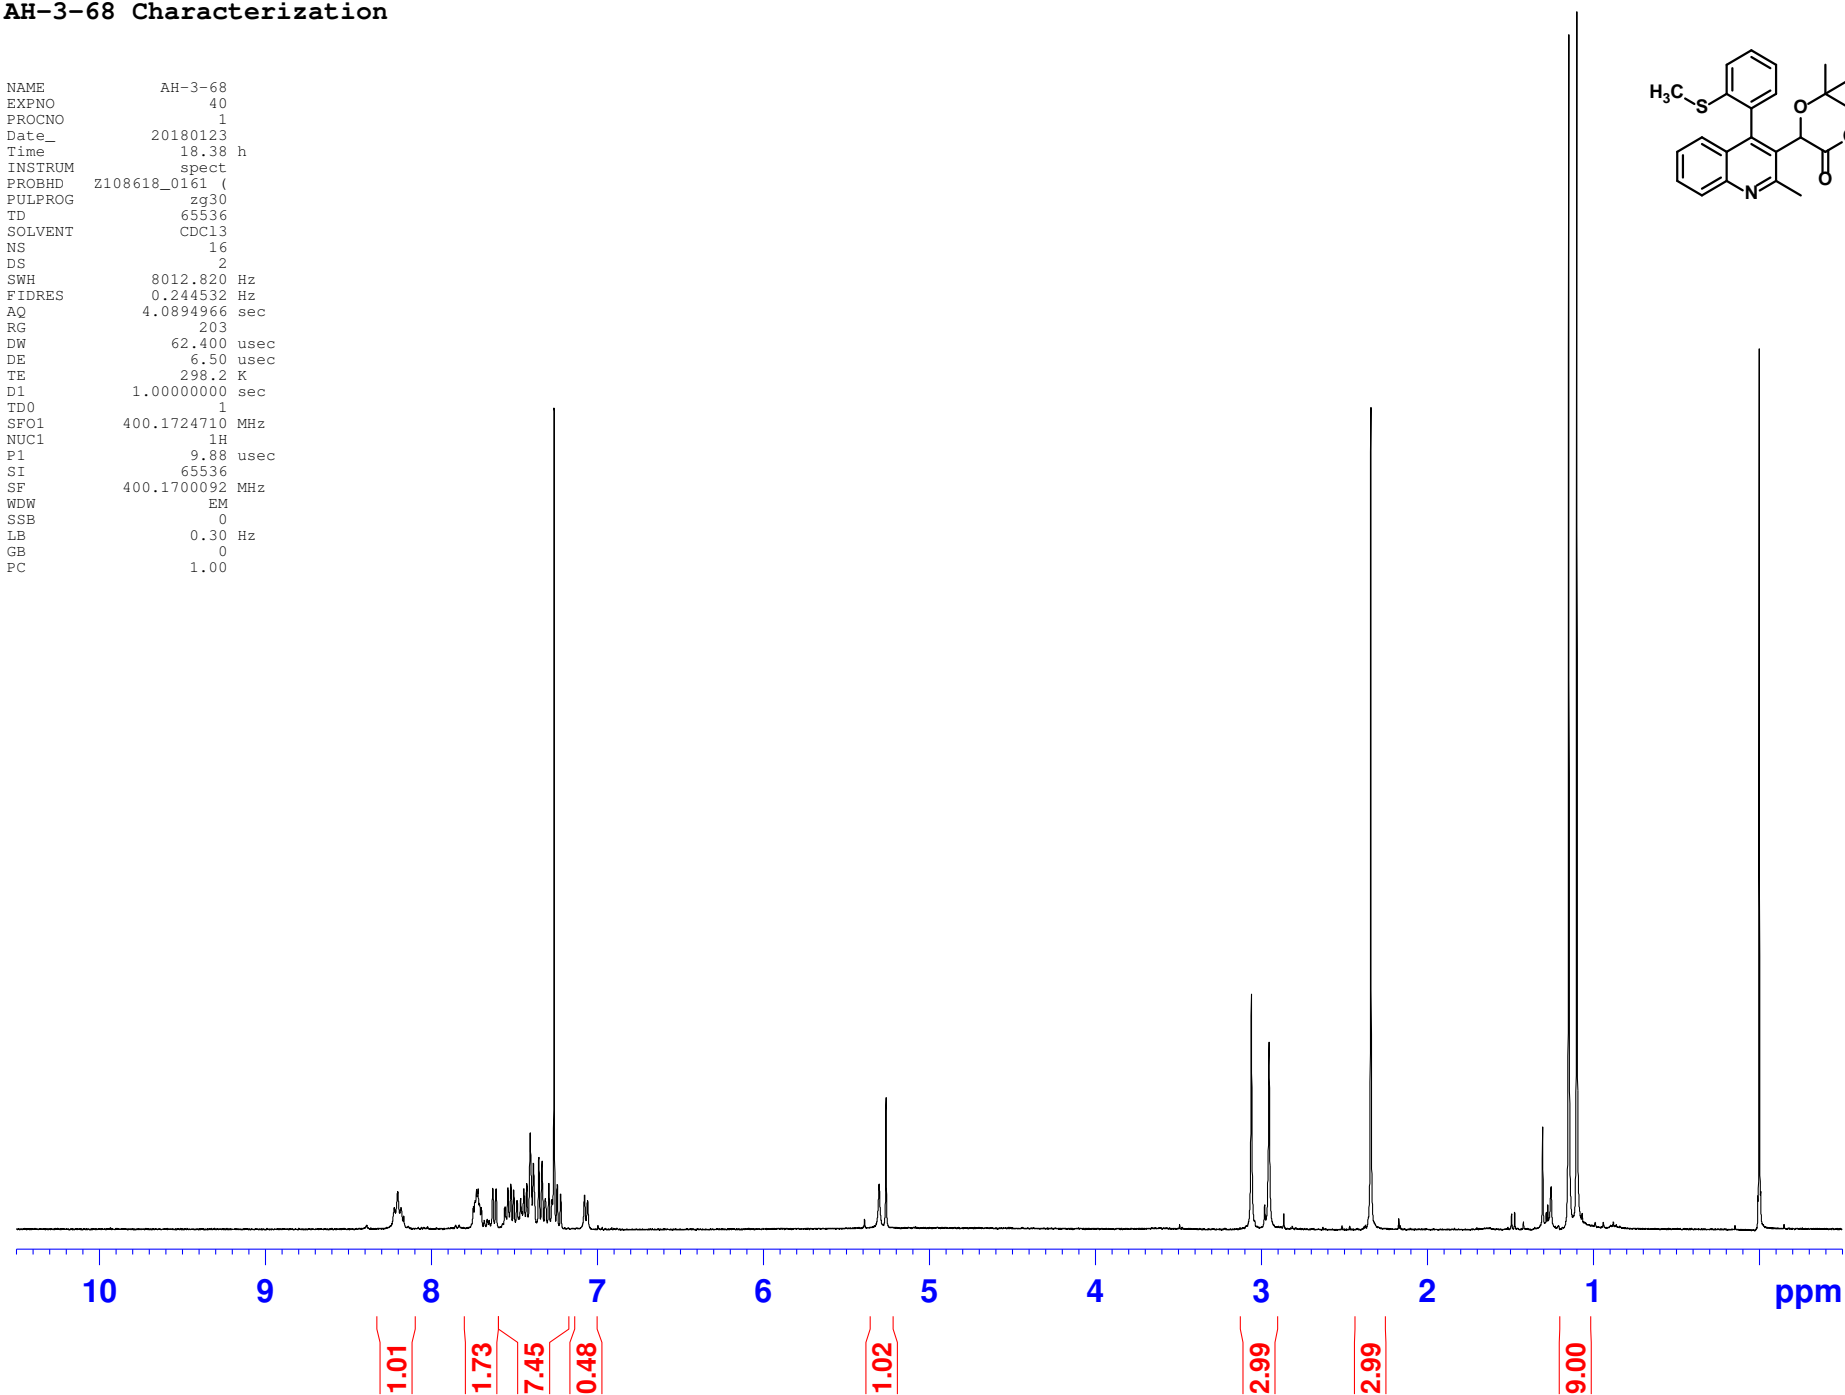

AH-3-68 Characterization

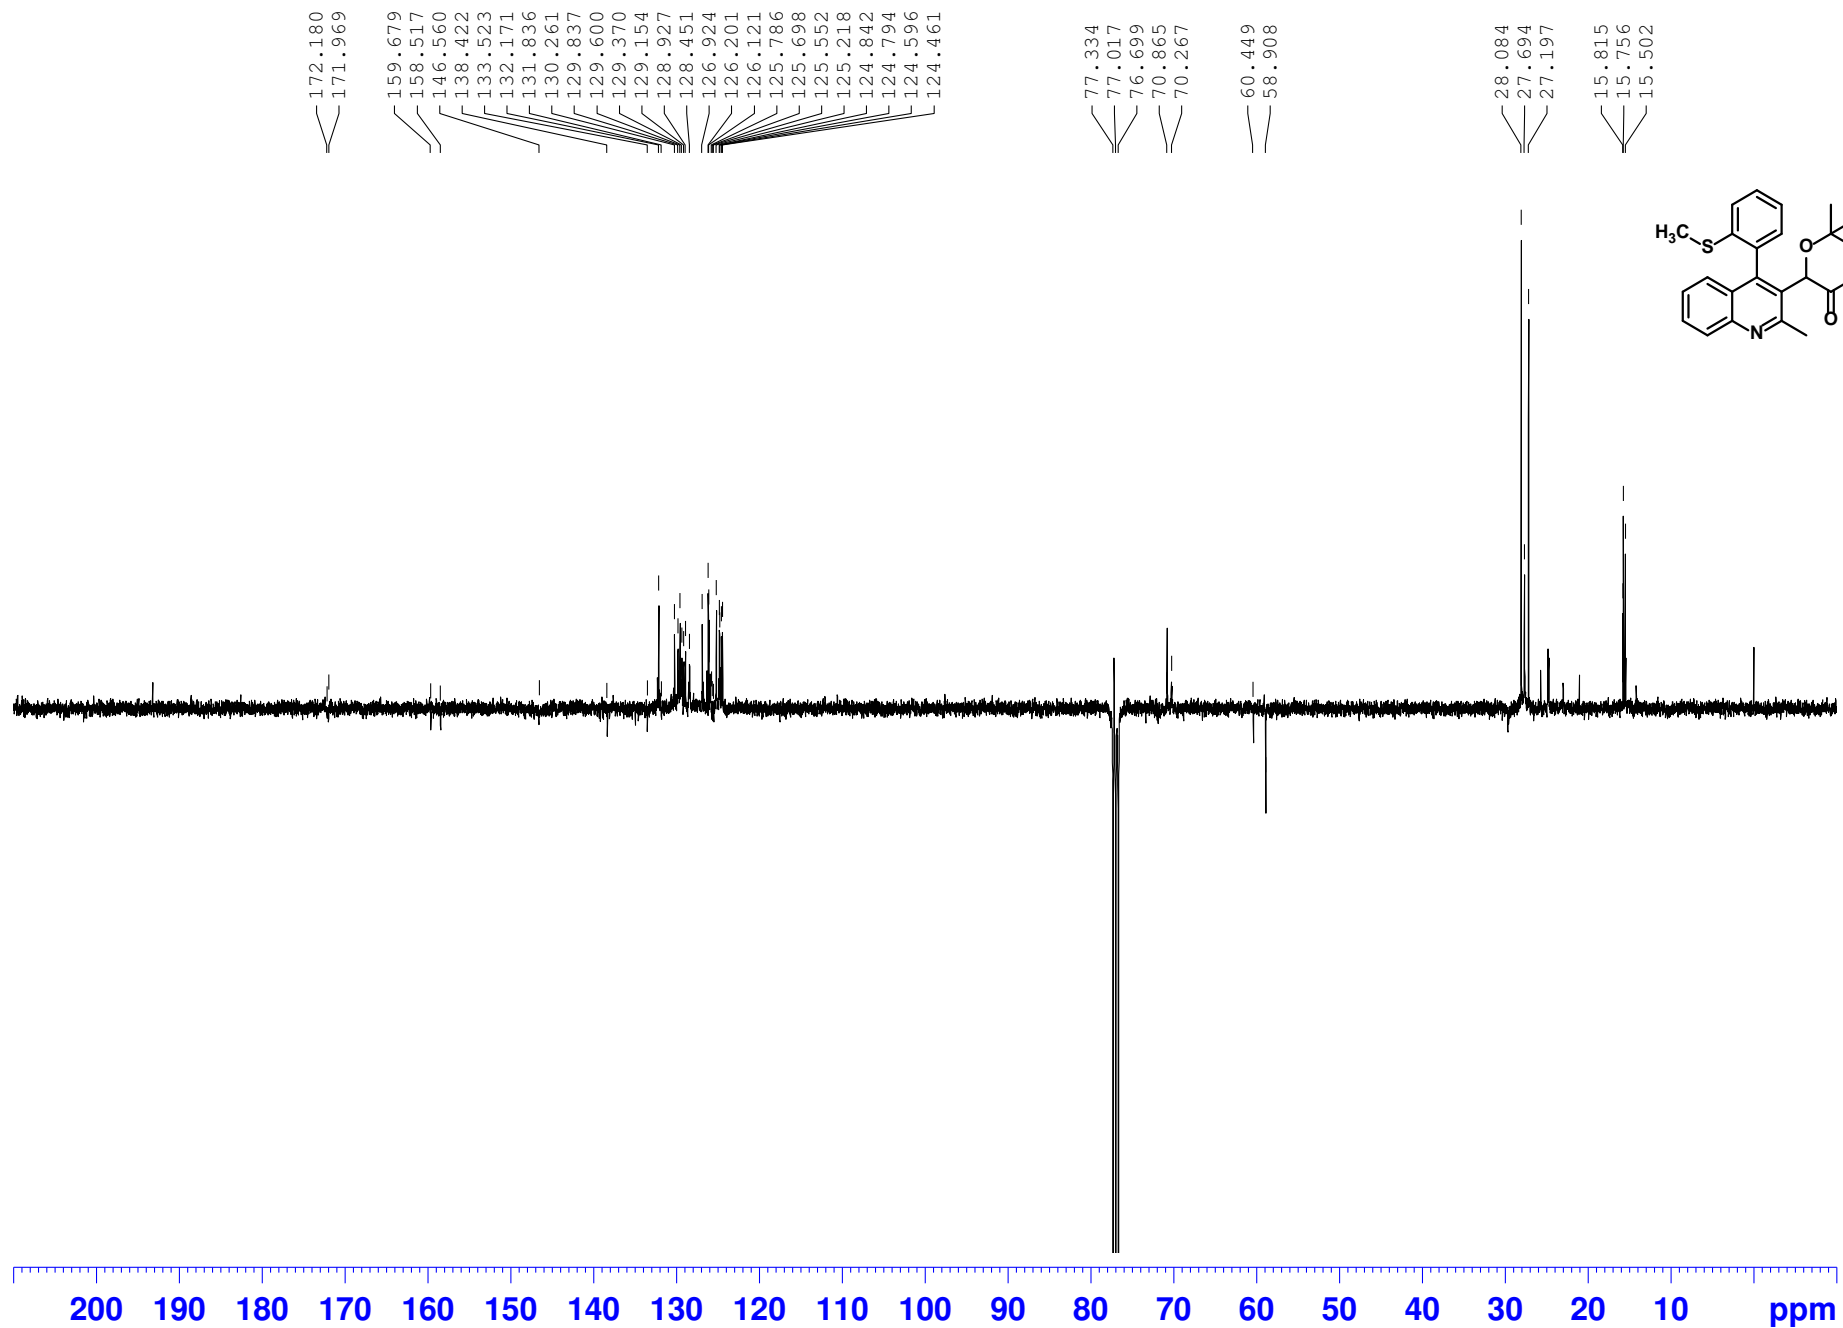

# Mass Spectrum List Report

## Analysis Info

Analysis Name F:\MS1-091514 - 080917\Data\apexdata031918\AH-3-68\_pos\_000002.d  
Method  
Sample Name AH-3-68  
Comment AH-3-68 in THF:MeOH C23H25NO3S H+

Acquisition Date 3/19/2018 10:36:56 AM  
Operator FTMS\_USER  
Instrument apex-Qe

Sample Name AH-3-68 in THF:MeOH  
Exact Mass of C23H25NO3S H+ = 396.162791 m/z  
Mass Observed = 396.163143 m/z

Difference < 1.0 ppm

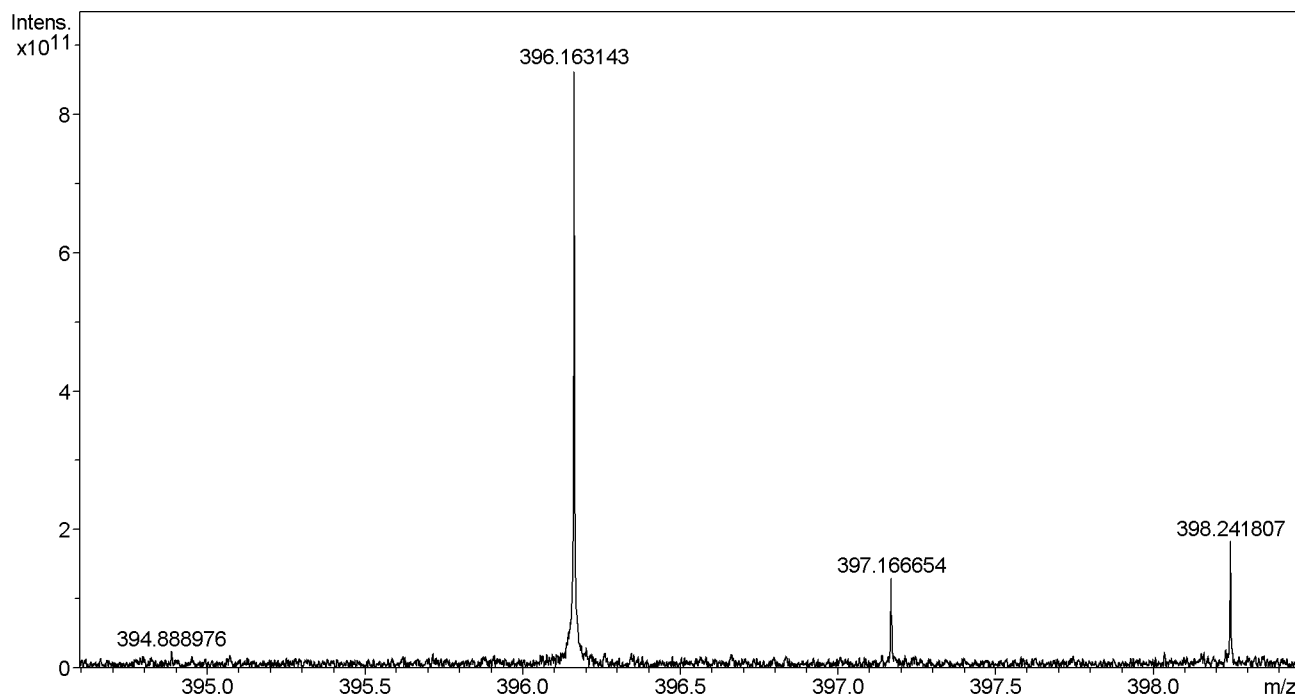

| #  | m/z        | I           |
|----|------------|-------------|
| 1  | 184.364001 | 22762458289 |
| 2  | 184.878384 | 21241342333 |
| 3  | 187.343157 | 21017350075 |
| 4  | 187.384622 | 24685059974 |
| 5  | 189.577846 | 21260231704 |
| 6  | 189.858746 | 21575374142 |
| 7  | 190.308343 | 23723229279 |
| 8  | 191.050071 | 24852381984 |
| 9  | 194.871909 | 21265921149 |
| 10 | 195.825594 | 23528541146 |
| 11 | 196.136598 | 22843993004 |
| 12 | 196.270055 | 21433605743 |
| 13 | 198.489568 | 22199415308 |
| 14 | 202.370411 | 22999981502 |
| 15 | 202.668439 | 28846841770 |
| 16 | 204.709005 | 22815448704 |
| 17 | 209.441901 | 26444619663 |
| 18 | 212.946072 | 21831298705 |
| 19 | 217.487644 | 24530435932 |
| 20 | 217.969529 | 25690661529 |



---

# Mass Spectrum List Report

---

| #  | m/z        | I             |
|----|------------|---------------|
| 21 | 218.053567 | 21060645137   |
| 22 | 219.446103 | 21234781170   |
| 23 | 222.121596 | 21240470973   |
| 24 | 229.501778 | 21162683038   |
| 25 | 230.908060 | 21129262035   |
| 26 | 231.120541 | 34001978291   |
| 27 | 235.150701 | 21242356141   |
| 28 | 237.549981 | 21702182660   |
| 29 | 237.864993 | 21838912751   |
| 30 | 240.558713 | 23361251609   |
| 31 | 242.376620 | 25477906007   |
| 32 | 246.256235 | 24447650142   |
| 33 | 246.518926 | 22842564091   |
| 34 | 247.432059 | 24116011970   |
| 35 | 249.724005 | 21451010258   |
| 36 | 250.068624 | 22901684403   |
| 37 | 250.623625 | 21137323541   |
| 38 | 254.143797 | 21259062333   |
| 39 | 257.931354 | 22297626738   |
| 40 | 267.232699 | 23960109483   |
| 41 | 270.178636 | 22211686703   |
| 42 | 271.130873 | 21494832411   |
| 43 | 273.047857 | 55883701960   |
| 44 | 277.235362 | 22765915263   |
| 45 | 280.965398 | 21578340146   |
| 46 | 281.606337 | 23316786097   |
| 47 | 282.618576 | 21192919352   |
| 48 | 287.244641 | 22918493936   |
| 49 | 289.853077 | 21477666536   |
| 50 | 291.293112 | 23004931587   |
| 51 | 294.094888 | 44068813778   |
| 52 | 296.393401 | 22406344703   |
| 53 | 301.075573 | 70870106424   |
| 54 | 302.063945 | 21358051566   |
| 55 | 304.931454 | 23175440368   |
| 56 | 310.573513 | 22446442828   |
| 57 | 313.405142 | 21467227899   |
| 58 | 326.820948 | 21633659553   |
| 59 | 330.769015 | 21773651988   |
| 60 | 332.206950 | 24654211243   |
| 61 | 332.654519 | 21982838321   |
| 62 | 332.679223 | 21958095027   |
| 63 | 340.146612 | 81639749893   |
| 64 | 341.150053 | 21951617321   |
| 65 | 342.143742 | 29396908379   |
| 66 | 344.069915 | 22450396999   |
| 67 | 351.356680 | 21912267560   |
| 68 | 351.931879 | 26252213719   |
| 69 | 351.960104 | 28176058898   |
| 70 | 351.997444 | 27770546441   |
| 71 | 352.057501 | 35219723454   |
| 72 | 352.084375 | 33886027330   |
| 73 | 352.096696 | 34818743010   |
| 74 | 352.173172 | 4193072757933 |
| 75 | 352.228123 | 59338107484   |
| 76 | 352.241609 | 43279376398   |
| 77 | 352.288976 | 34138431250   |
| 78 | 352.340115 | 31944324471   |
| 79 | 352.390142 | 23267126615   |
| 80 | 352.443116 | 26538207728   |
| 81 | 353.156062 | 33250476436   |
| 82 | 353.176589 | 849144565106  |
| 83 | 353.179467 | 364039769756  |
| 84 | 354.169089 | 52424319335   |

---

# Mass Spectrum List Report

---

| #   | m/z        | I            |
|-----|------------|--------------|
| 85  | 354.180078 | 46508314293  |
| 86  | 355.172358 | 28276942887  |
| 87  | 356.418548 | 22567510073  |
| 88  | 361.607795 | 23171425353  |
| 89  | 365.107209 | 22590738186  |
| 90  | 366.152607 | 24103033917  |
| 91  | 368.168256 | 98441701868  |
| 92  | 369.171493 | 29331077604  |
| 93  | 372.970622 | 27216633152  |
| 94  | 374.155445 | 36058628828  |
| 95  | 374.967327 | 23940724709  |
| 96  | 377.327751 | 24148259426  |
| 97  | 382.182752 | 22118605458  |
| 98  | 382.596283 | 22478062851  |
| 99  | 384.136514 | 127509451743 |
| 100 | 386.133601 | 46992887507  |
| 101 | 386.811707 | 22946605637  |
| 102 | 389.586757 | 23771674094  |
| 103 | 390.150387 | 28808588623  |
| 104 | 390.360696 | 22623648459  |
| 105 | 393.297782 | 23915393931  |
| 106 | 394.888976 | 23533305017  |
| 107 | 396.163143 | 864260531360 |
| 108 | 396.201462 | 28432003826  |
| 109 | 397.166654 | 129635243670 |
| 110 | 398.031668 | 22171288247  |
| 111 | 398.158884 | 22639283950  |
| 112 | 398.227084 | 25973764373  |
| 113 | 398.241807 | 182527781662 |
| 114 | 399.245281 | 36916809819  |
| 115 | 400.040863 | 29937106789  |
| 116 | 400.255696 | 22578597080  |
| 117 | 406.232422 | 23840783291  |
| 118 | 409.844347 | 21952549544  |
| 119 | 416.129695 | 23136531046  |
| 120 | 418.145542 | 30619373805  |
| 121 | 421.179126 | 24976824446  |
| 122 | 422.022811 | 46206617783  |
| 123 | 425.287941 | 40430215530  |
| 124 | 428.536022 | 112075231033 |
| 125 | 432.936330 | 21772787393  |
| 126 | 435.345060 | 67226819896  |
| 127 | 439.603504 | 23998717997  |
| 128 | 455.354180 | 21911599674  |
| 129 | 459.179522 | 22262073031  |
| 130 | 461.185606 | 22147437736  |
| 131 | 464.054605 | 22273316275  |
| 132 | 477.180676 | 33345949814  |
| 133 | 479.182045 | 28329901838  |
| 134 | 480.551023 | 23971358987  |
| 135 | 487.479361 | 23853373209  |
| 136 | 490.885063 | 36733260714  |
| 137 | 493.143064 | 22493795734  |
| 138 | 493.175597 | 399524301639 |
| 139 | 494.179036 | 59504457568  |
| 140 | 508.582218 | 196347035284 |
| 141 | 509.585638 | 59286346704  |
| 142 | 511.436561 | 26346917757  |
| 143 | 524.576973 | 80706771110  |
| 144 | 525.580721 | 28848920987  |
| 145 | 536.193366 | 25494882228  |
| 146 | 536.547736 | 27406230545  |
| 147 | 536.613411 | 739468037766 |
| 148 | 537.395290 | 27288531733  |

---

## Mass Spectrum List Report

---

| #   | m/z        | I            |
|-----|------------|--------------|
| 149 | 537.616897 | 229005406938 |
| 150 | 538.620396 | 39400798882  |
| 151 | 540.056752 | 23676835173  |
| 152 | 545.023414 | 22620677394  |
| 153 | 552.608495 | 250675779816 |
| 154 | 553.611811 | 79075726262  |
| 155 | 556.141831 | 22530372775  |
| 156 | 558.857306 | 22354908055  |
| 157 | 564.644871 | 229671811401 |
| 158 | 565.648104 | 72667817955  |
| 159 | 569.403172 | 34653445266  |
| 160 | 580.639771 | 69218601882  |
| 161 | 581.642681 | 30364128875  |
| 162 | 585.235666 | 22741325804  |
| 163 | 592.676253 | 262043319321 |
| 164 | 593.679668 | 103091093315 |
| 165 | 599.549195 | 30664111375  |
| 166 | 608.670998 | 72909453790  |
| 167 | 613.429565 | 40963108996  |
| 168 | 615.226096 | 22924191615  |
| 169 | 618.284811 | 23945482779  |
| 170 | 632.701866 | 23812440410  |
| 171 | 657.456011 | 36874118527  |
| 172 | 667.994095 | 22915574141  |
| 173 | 685.436785 | 49450802655  |
| 174 | 686.439961 | 24679519489  |
| 175 | 716.411481 | 23087344457  |
| 176 | 727.725250 | 23642289216  |
| 177 | 741.031525 | 24267356353  |
| 178 | 745.507752 | 22975457003  |
| 179 | 759.772411 | 23342313433  |
| 180 | 770.375636 | 24198511463  |
| 181 | 937.930416 | 27764977923  |
| 182 | 964.671285 | 26713493822  |
| 183 | 965.781709 | 26314823463  |

# AH-3-75 Characterization

MISSISS

NAME AH-3-75  
EXPNO 20  
PROCNO 1  
Date\_ 20180211  
Time 15.24 h  
INSTRUM spect  
PROBHD z108618\_0161 (  
PULPROG zg30  
TD 65536  
SOLVENT CDC13  
NS 16  
DS 2  
SWH 8012.820 Hz  
FIDRES 0.244532 Hz  
AQ 4.0894966 sec  
RG 114  
DW 62.400 usec  
DE 6.50 usec  
TE 298.3 K  
D1 1.00000000 sec  
TDO 1  
SFO1 400.1724710 MHz  
NUC1 1H  
P1 9.88 usec  
SI 65536  
SF 400.1700078 MHz  
WDW EM  
SSB 0  
LB 0.30 Hz  
GB 0  
PC 1.00

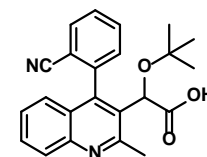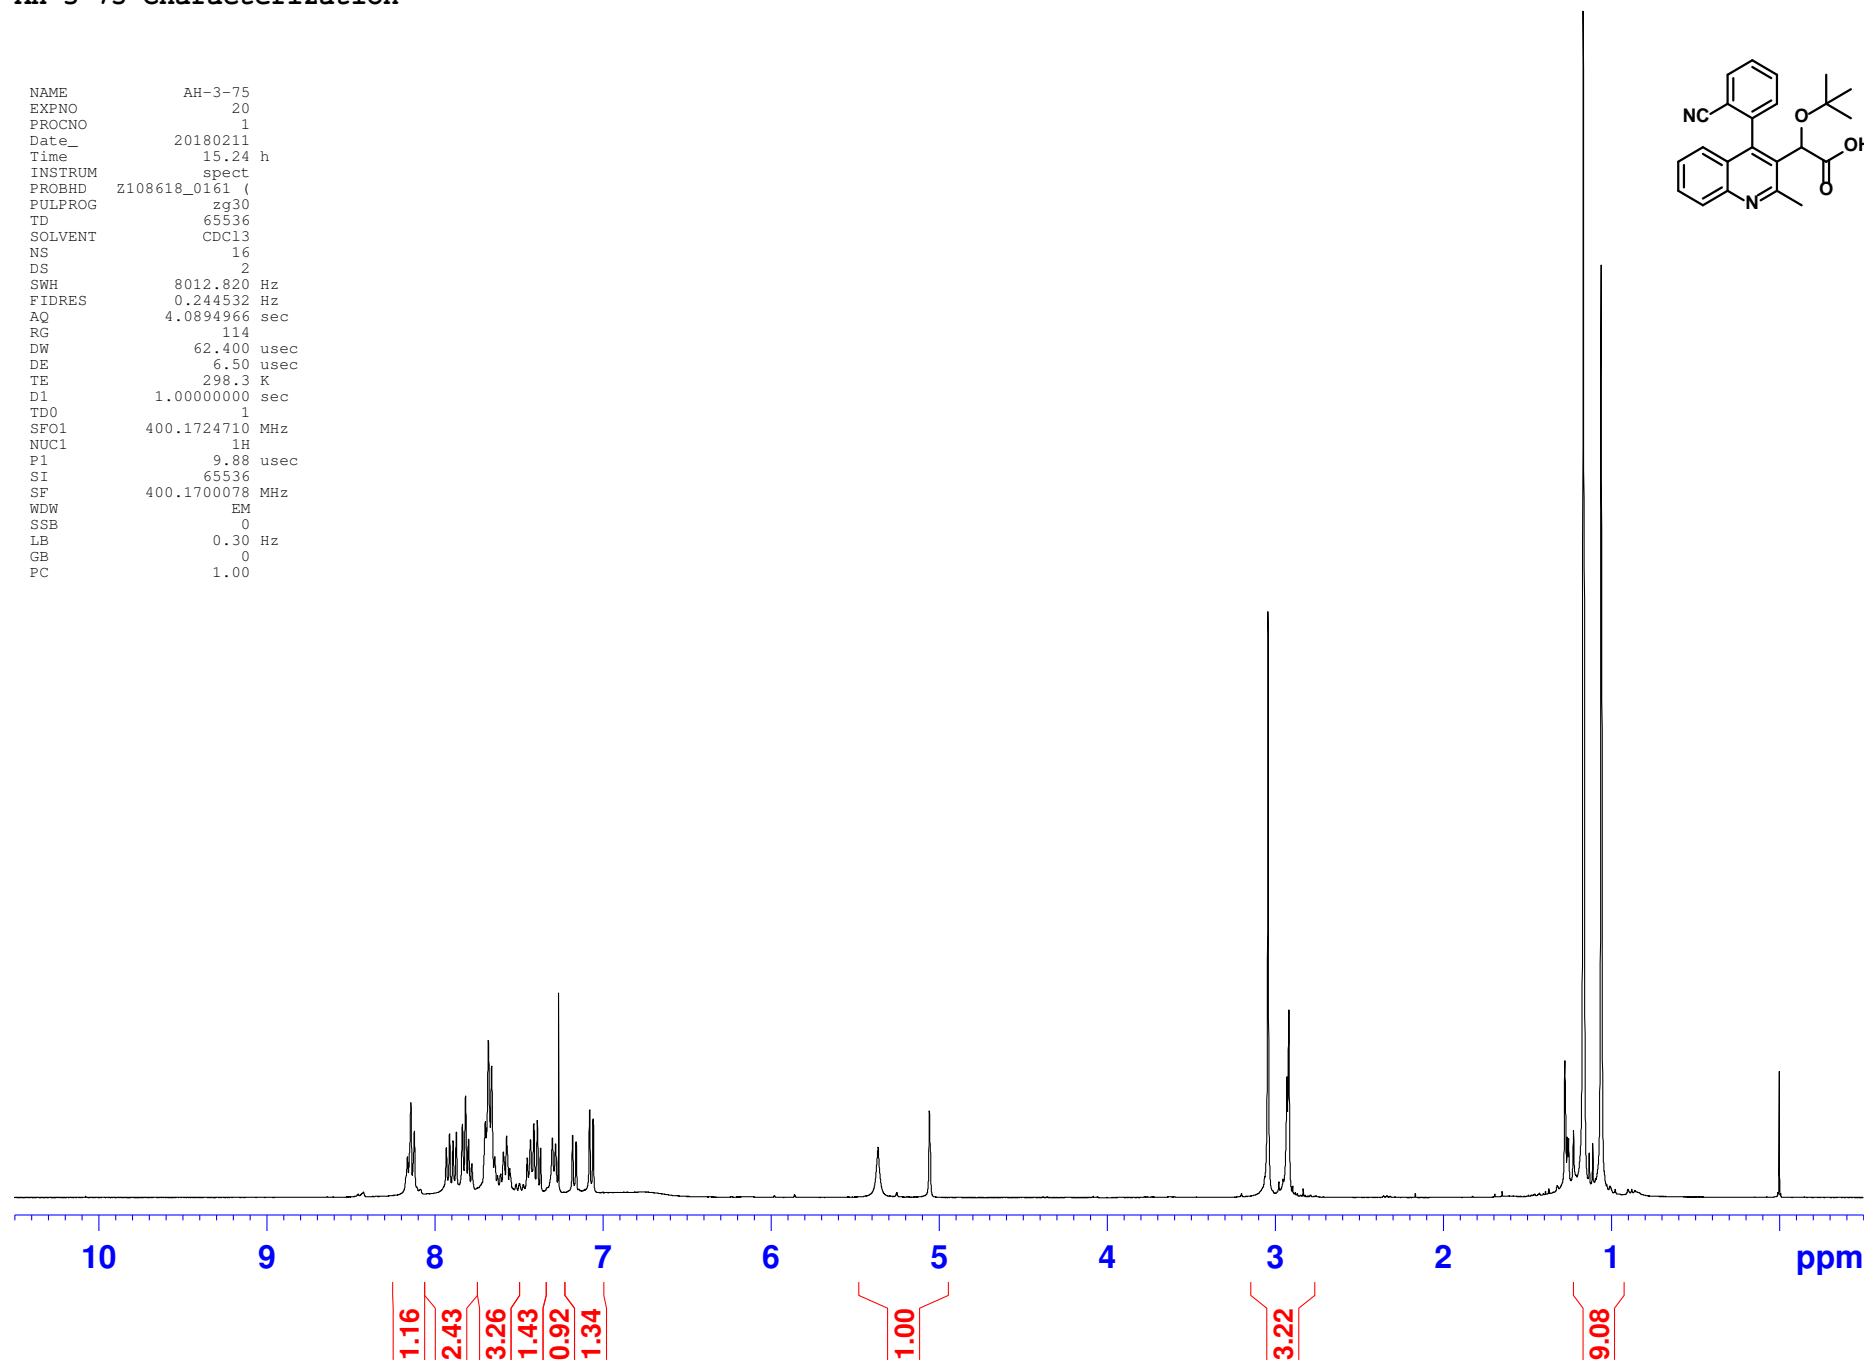

AH-3-75 Characterization

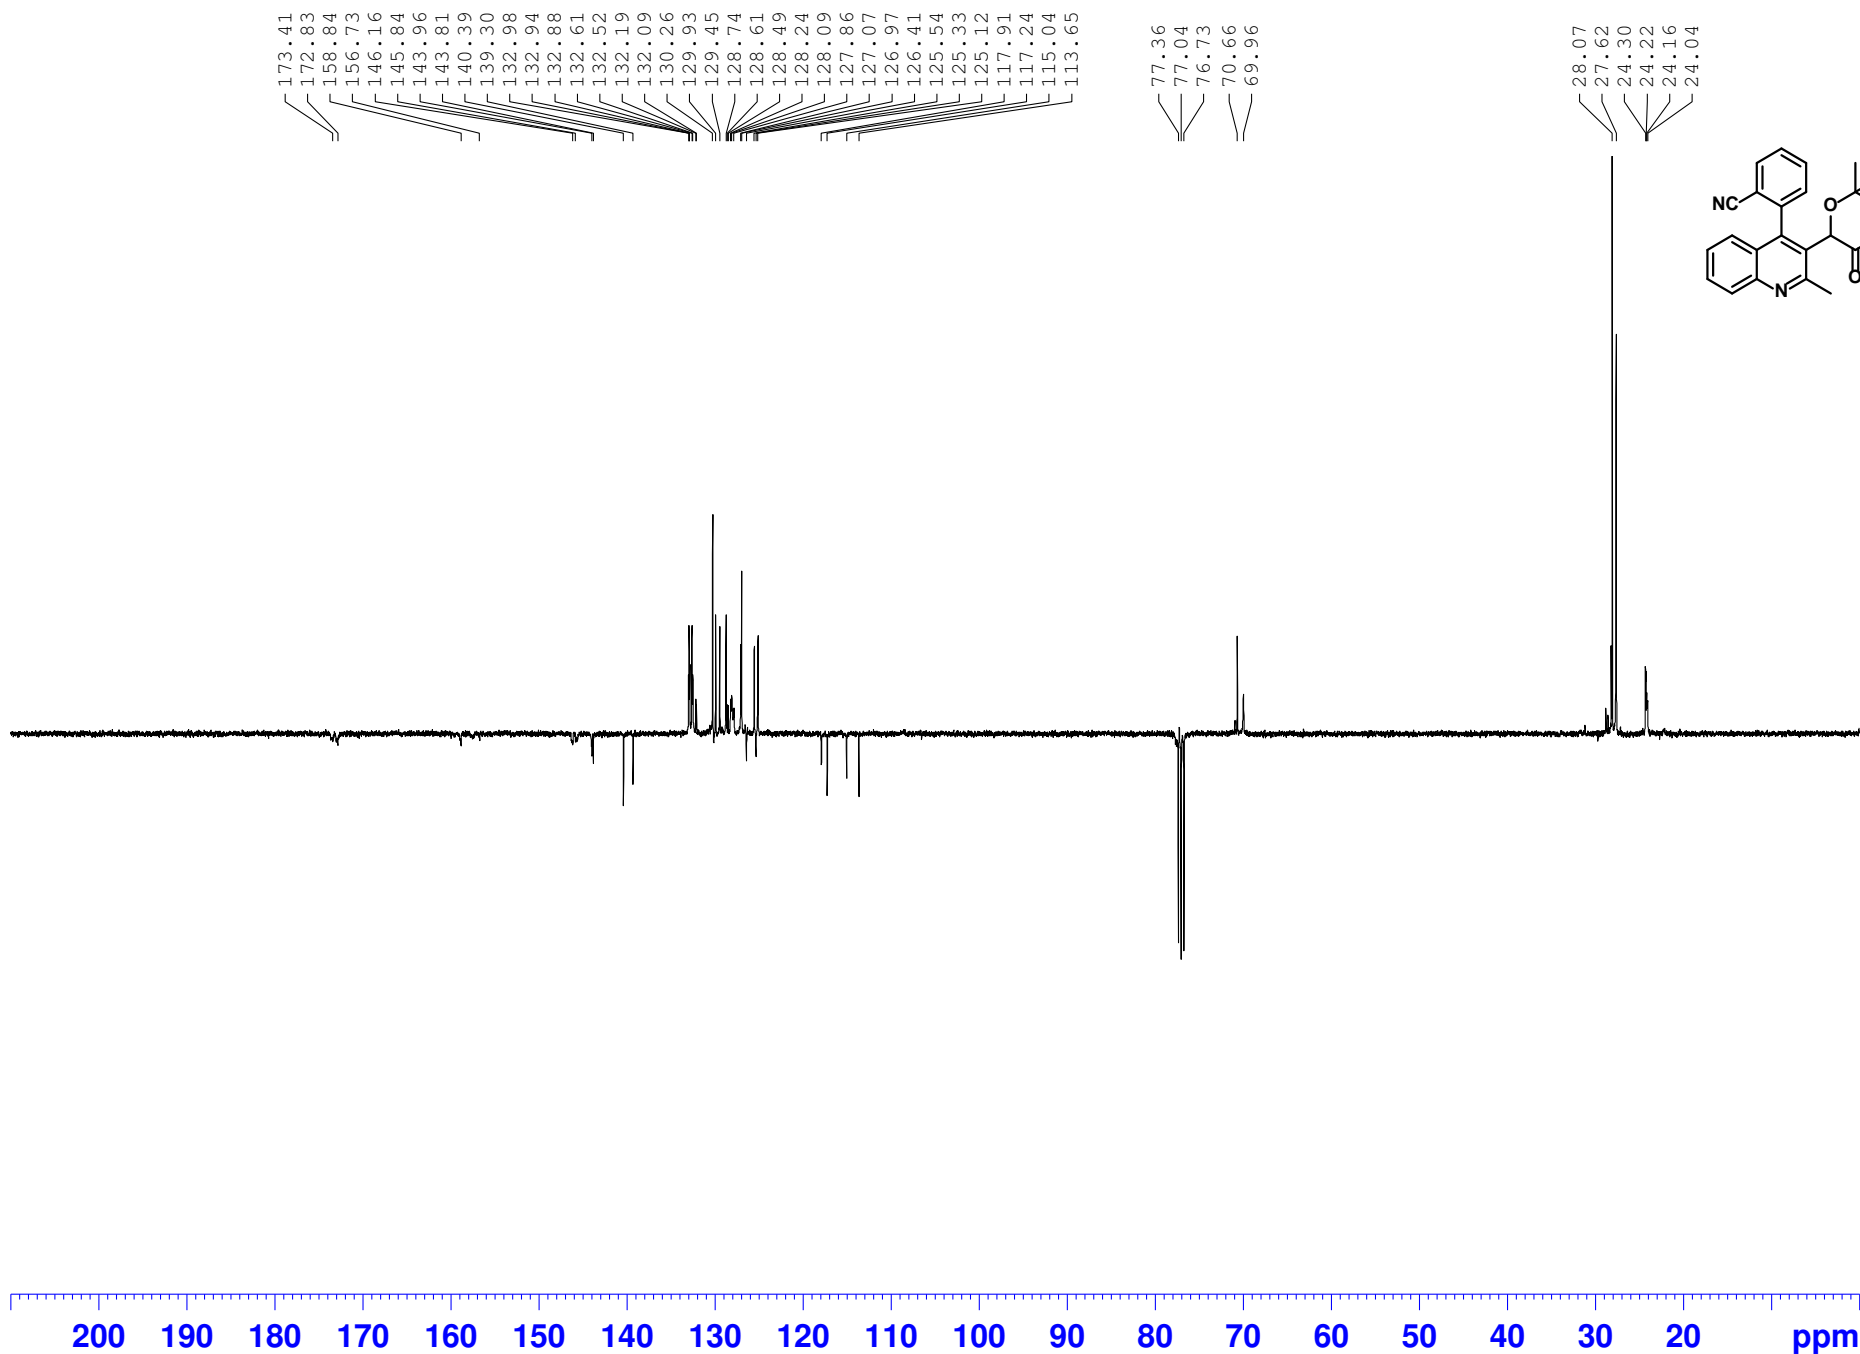

# Mass Spectrum List Report

## Analysis Info

Analysis Name F:\MS1-091514 - 080917\Data\apexdata031918\AH-3-75\_pos\_000003.d  
Method  
Sample Name AH-3-75  
Comment AH-3-75 in THF:MeOH C23H22N2O3 H+

Acquisition Date 3/19/2018 11:34:16 AM  
Operator FTMS\_USER  
Instrument apex-Qe

Sample Name AH-3-75 in THF:MeOH  
Exact Mass of C23H22N2O3 H+ = 375.170319 m/z  
Mass Not Observed = m/z  
Difference = N/A

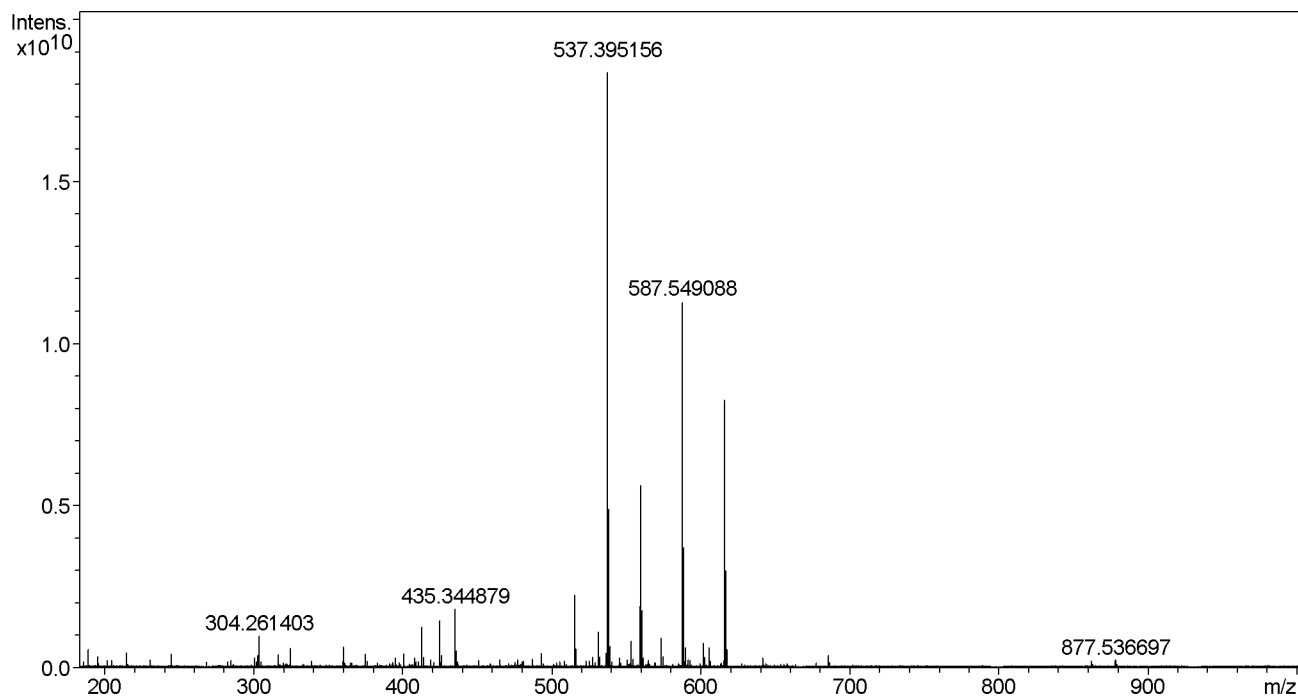

| #  | m/z        | I         |
|----|------------|-----------|
| 1  | 189.394538 | 139196720 |
| 2  | 189.768514 | 557014958 |
| 3  | 202.340515 | 210169631 |
| 4  | 215.089195 | 454344571 |
| 5  | 216.092530 | 108243493 |
| 6  | 231.120546 | 234538242 |
| 7  | 245.099787 | 419395313 |
| 8  | 269.136172 | 168792193 |
| 9  | 283.115525 | 181324552 |
| 10 | 285.131103 | 215789866 |
| 11 | 287.146789 | 104514300 |
| 12 | 301.126061 | 300737935 |
| 13 | 301.141316 | 125404668 |
| 14 | 301.162456 | 233539219 |
| 15 | 302.245683 | 183706730 |
| 16 | 303.141741 | 374967393 |
| 17 | 304.261403 | 981797212 |
| 18 | 305.264705 | 178629215 |
| 19 | 317.120972 | 405206612 |
| 20 | 317.157374 | 100662963 |

---

# Mass Spectrum List Report

---

| #  | m/z        | I          |
|----|------------|------------|
| 21 | 317.172640 | 103358171  |
| 22 | 320.256317 | 135905083  |
| 23 | 322.199215 | 112953104  |
| 24 | 323.107976 | 100942031  |
| 25 | 325.123728 | 601905317  |
| 26 | 334.235600 | 104728518  |
| 27 | 339.102937 | 169404334  |
| 28 | 339.154653 | 200926983  |
| 29 | 360.323964 | 625407957  |
| 30 | 361.084949 | 155542606  |
| 31 | 361.327463 | 144274256  |
| 32 | 365.136322 | 151080195  |
| 33 | 366.225345 | 137682614  |
| 34 | 375.199251 | 429278660  |
| 35 | 375.214506 | 103415307  |
| 36 | 376.318989 | 196647689  |
| 37 | 383.082418 | 148826092  |
| 38 | 391.194133 | 102378984  |
| 39 | 391.209368 | 110210679  |
| 40 | 393.209852 | 106377619  |
| 41 | 393.297868 | 154148072  |
| 42 | 395.165630 | 310244368  |
| 43 | 398.241836 | 163785129  |
| 44 | 399.061896 | 108509388  |
| 45 | 401.077417 | 446256243  |
| 46 | 405.188818 | 114206764  |
| 47 | 407.189168 | 98769737   |
| 48 | 407.204309 | 88855494   |
| 49 | 407.313598 | 106671957  |
| 50 | 408.308869 | 304852763  |
| 51 | 409.220004 | 183028531  |
| 52 | 411.160546 | 181404571  |
| 53 | 413.266645 | 1243503321 |
| 54 | 414.270023 | 324342458  |
| 55 | 419.043557 | 235604859  |
| 56 | 421.329321 | 163890538  |
| 57 | 425.139768 | 234403042  |
| 58 | 425.287784 | 1459319994 |
| 59 | 426.291169 | 385487382  |
| 60 | 435.344879 | 1827363439 |
| 61 | 436.348219 | 509410678  |
| 62 | 437.038552 | 90124406   |
| 63 | 437.236224 | 183595596  |
| 64 | 451.153080 | 227719960  |
| 65 | 459.036127 | 122611249  |
| 66 | 465.184039 | 243744787  |
| 67 | 471.119596 | 110829012  |
| 68 | 475.325973 | 163299977  |
| 69 | 477.180603 | 108872315  |
| 70 | 477.316666 | 233617366  |
| 71 | 479.313666 | 100413977  |
| 72 | 480.091576 | 170560301  |
| 73 | 481.262443 | 196648824  |
| 74 | 487.114331 | 264728568  |
| 75 | 493.175476 | 438170934  |
| 76 | 494.178716 | 128660854  |
| 77 | 501.093725 | 98870205   |
| 78 | 503.332161 | 99596080   |
| 79 | 503.455266 | 142351014  |
| 80 | 505.348043 | 173025570  |
| 81 | 508.582146 | 192723762  |
| 82 | 515.259694 | 2264390335 |
| 83 | 516.263097 | 577389311  |
| 84 | 523.075635 | 202571405  |

---

# Mass Spectrum List Report

---

| #   | m/z        | I           |
|-----|------------|-------------|
| 85  | 523.142663 | 132704565   |
| 86  | 525.091310 | 106768824   |
| 87  | 525.288640 | 190371842   |
| 88  | 527.106990 | 316795638   |
| 89  | 529.239019 | 163324197   |
| 90  | 531.486535 | 1112553426  |
| 91  | 532.489896 | 328383617   |
| 92  | 536.613420 | 455995807   |
| 93  | 537.190520 | 245481868   |
| 94  | 537.210910 | 219657152   |
| 95  | 537.395156 | 18653611985 |
| 96  | 537.616564 | 265207720   |
| 97  | 538.398655 | 4897632747  |
| 98  | 539.391321 | 640538089   |
| 99  | 539.402190 | 659085061   |
| 100 | 540.394644 | 175846920   |
| 101 | 545.502187 | 311849717   |
| 102 | 546.505505 | 142738813   |
| 103 | 550.628964 | 237950547   |
| 104 | 552.608228 | 112572201   |
| 105 | 553.390303 | 803758687   |
| 106 | 554.393497 | 249651569   |
| 107 | 559.517800 | 5604400700  |
| 108 | 560.521226 | 1796105180  |
| 109 | 561.524444 | 307471742   |
| 110 | 564.644829 | 220680603   |
| 111 | 565.426617 | 99960529    |
| 112 | 565.648114 | 106918743   |
| 113 | 569.314801 | 158506964   |
| 114 | 569.402905 | 126565690   |
| 115 | 573.218310 | 131105455   |
| 116 | 573.533519 | 922178827   |
| 117 | 574.536928 | 344090461   |
| 118 | 581.034288 | 97403332    |
| 119 | 585.065588 | 123341367   |
| 120 | 587.549088 | 11299437943 |
| 121 | 588.552471 | 3741279776  |
| 122 | 589.371720 | 205372627   |
| 123 | 589.555831 | 614665242   |
| 124 | 591.213578 | 232837589   |
| 125 | 592.676124 | 226075671   |
| 126 | 599.548964 | 128592973   |
| 127 | 601.564809 | 777201439   |
| 128 | 602.568278 | 316142367   |
| 129 | 605.366595 | 619112758   |
| 130 | 606.369956 | 204583222   |
| 131 | 613.429277 | 133133771   |
| 132 | 615.580374 | 8263536301  |
| 133 | 616.583824 | 2985628767  |
| 134 | 617.587068 | 555981464   |
| 135 | 627.444564 | 113683980   |
| 136 | 641.289098 | 293028893   |
| 137 | 643.611944 | 124084029   |
| 138 | 653.135964 | 103955707   |
| 139 | 655.268509 | 92881173    |
| 140 | 657.455318 | 125682373   |
| 141 | 663.424643 | 105589512   |
| 142 | 677.250793 | 131588312   |
| 143 | 685.436324 | 371904705   |
| 144 | 686.439484 | 159551969   |
| 145 | 861.541194 | 193453587   |
| 146 | 862.544876 | 103385238   |
| 147 | 877.536697 | 228947574   |
| 148 | 878.540283 | 104834344   |



NGJ-8-090 (CD3OD, 400MHz) Pure Yellow Oil - saponification of biphenylquinoline

NAME NGJ-8-090  
 EXPNO 30  
 PROCNO 1  
 Date\_ 20171207  
 Time\_ 17.09 h  
 INSTRUM spect  
 PROBHD Z108618\_0161 (   
 PULPROG zg30  
 TD 65536  
 SOLVENT MeOD  
 NS 16  
 DS 2  
 SWH 8012.820 Hz  
 FIDRES 0.244532 Hz  
 AQ 4.0894966 sec  
 RG 90.5  
 DW 62.400 usec  
 DE 6.50 usec  
 TE 298.3 K  
 D1 1.00000000 sec  
 TD0 1  
 SFO1 400.1724710 MHz  
 NUC1 1H  
 P1 9.88 usec  
 SI 65536  
 SF 400.1700000 MHz  
 WDW EM  
 SSB 0  
 LB 0.30 Hz  
 GB 0  
 PC 1.00

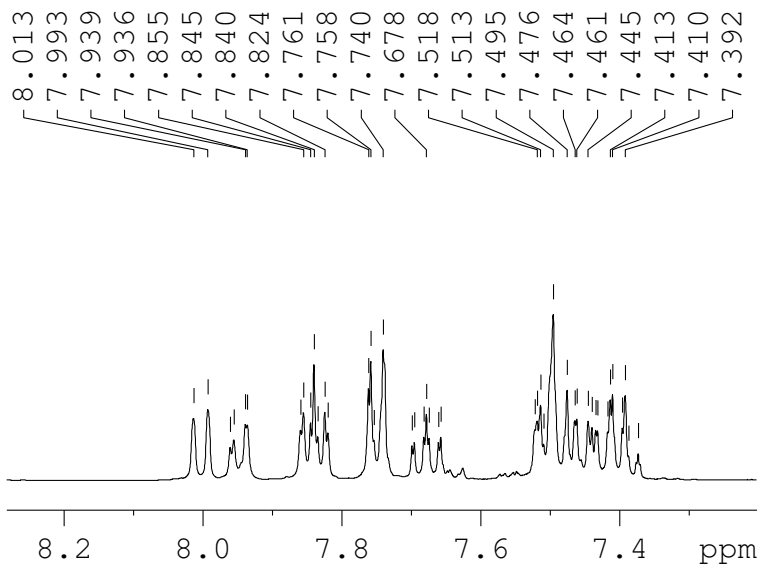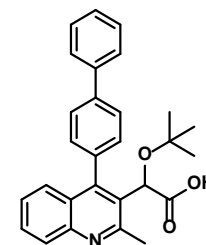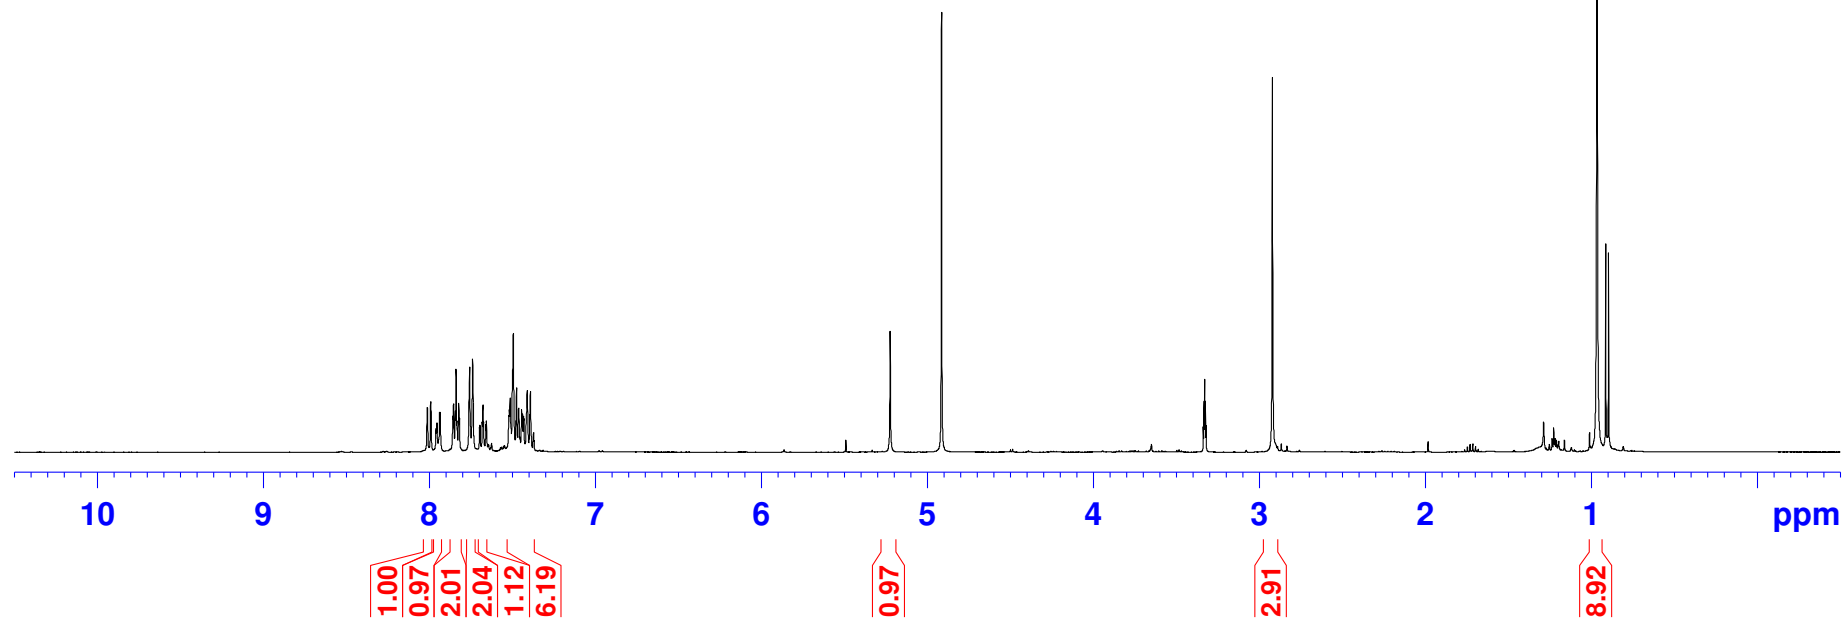

NGJ-8-090 (CD3OD, 400MHz) Pure Yellow Oil - saponification of biphenylquinoline

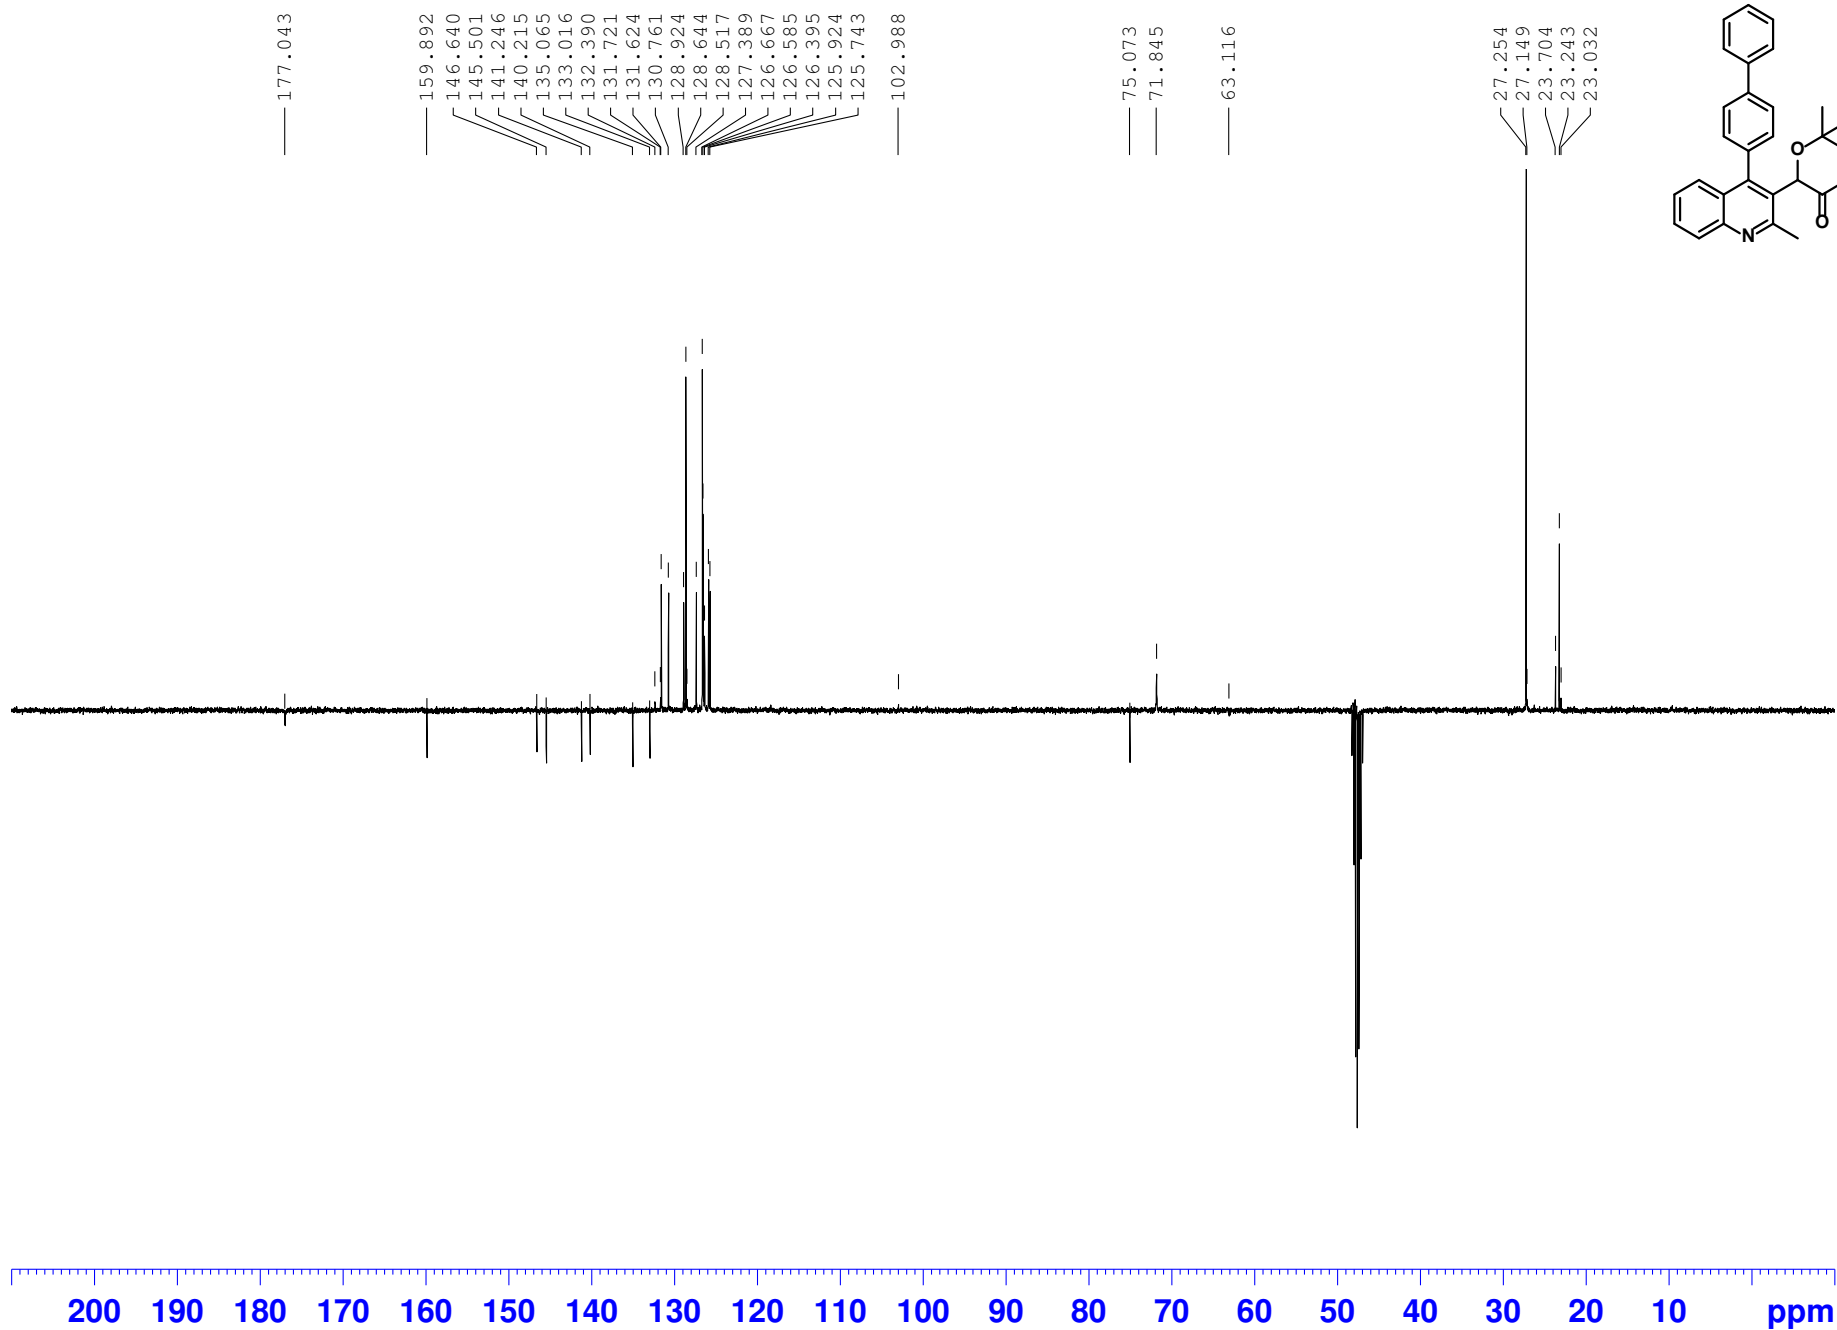

# Mass Spectrum List Report

## Analysis Info

Analysis Name F:\MS1-091514 - 080917\Data\apexdata031918\NGJ-8-090\_pos\_000001.d  
Method  
Sample Name NGJ-8-090  
Comment NGJ-8-090 in THF:MeOH C28H27NO3 H+

Acquisition Date 3/19/2018 12:13:19 PM  
Operator FTMS\_USER  
Instrument apex-Qe

Sample Name NGJ-8-090 in THF:MeOH  
Exact Mass of C28H27NO3 H+ = 426.206370 m/z  
Mass Observed = 426.207036 m/z  
Difference < 2.0 ppm

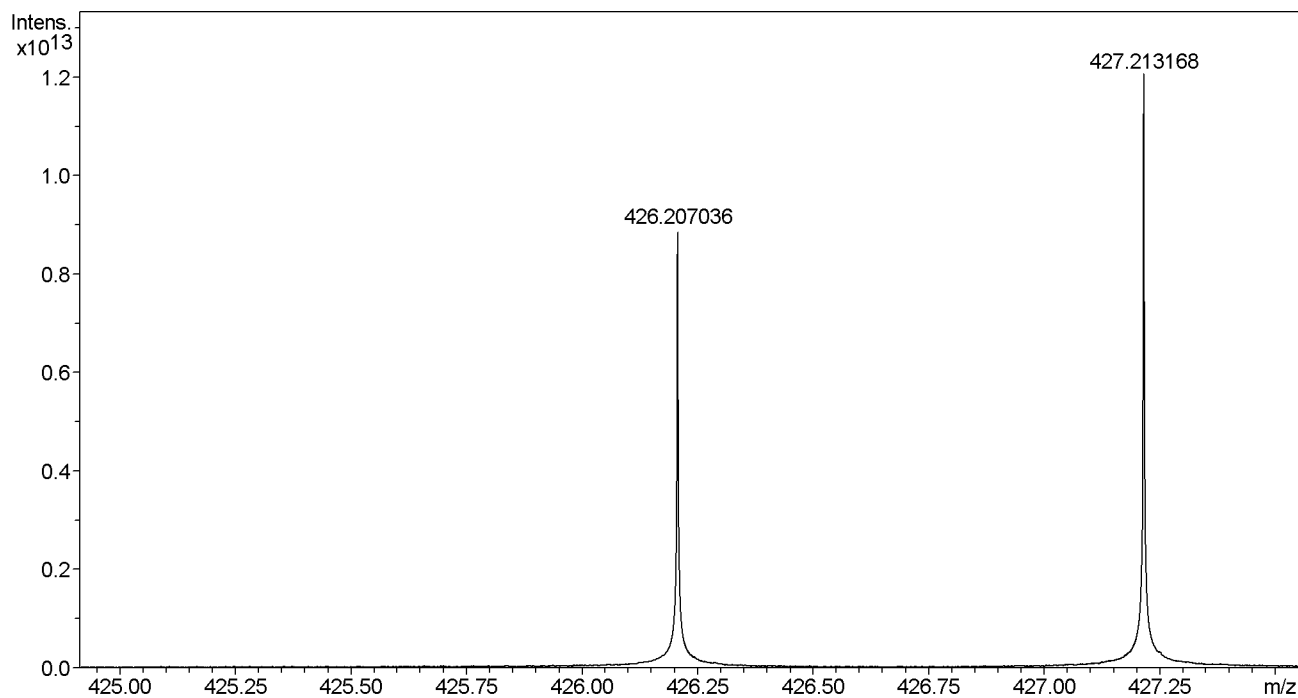

| #  | m/z        | I            |
|----|------------|--------------|
| 1  | 184.313270 | 33310053773  |
| 2  | 184.917264 | 22295500552  |
| 3  | 186.740640 | 21508528502  |
| 4  | 188.104573 | 21980134048  |
| 5  | 190.831216 | 24572204461  |
| 6  | 193.465473 | 21497786750  |
| 7  | 194.838837 | 22326081671  |
| 8  | 195.066385 | 25011980163  |
| 9  | 195.276287 | 21442156534  |
| 10 | 196.909851 | 21298449841  |
| 11 | 197.399873 | 21844493955  |
| 12 | 200.664623 | 21582837734  |
| 13 | 201.178828 | 23078591444  |
| 14 | 202.075183 | 25013248059  |
| 15 | 202.340487 | 106158526274 |
| 16 | 202.359516 | 22062305083  |
| 17 | 202.629790 | 24593510285  |
| 18 | 209.153386 | 21655678932  |
| 19 | 210.429918 | 21410099490  |
| 20 | 212.155292 | 21591127437  |

---

# Mass Spectrum List Report

---

| #  | m/z        | I            |
|----|------------|--------------|
| 21 | 213.107016 | 36608268683  |
| 22 | 213.358317 | 31281259568  |
| 23 | 213.610158 | 133545095591 |
| 24 | 214.113210 | 37793895562  |
| 25 | 214.902986 | 21176593238  |
| 26 | 217.913017 | 21215311291  |
| 27 | 218.291318 | 21629011015  |
| 28 | 222.329046 | 22025999591  |
| 29 | 223.507053 | 21151435438  |
| 30 | 223.520231 | 21296142087  |
| 31 | 224.408916 | 21604075758  |
| 32 | 228.050127 | 23866130468  |
| 33 | 228.837690 | 21353860041  |
| 34 | 233.453948 | 21487114017  |
| 35 | 239.045270 | 21237434596  |
| 36 | 239.609881 | 25583902927  |
| 37 | 240.080913 | 24292301457  |
| 38 | 241.088552 | 22557833473  |
| 39 | 242.816701 | 21113706283  |
| 40 | 243.978037 | 22415426017  |
| 41 | 251.199288 | 22868201618  |
| 42 | 255.692332 | 24629633706  |
| 43 | 255.879542 | 21197625072  |
| 44 | 256.185395 | 23260153117  |
| 45 | 258.886669 | 27862350672  |
| 46 | 260.178675 | 22497260744  |
| 47 | 260.378821 | 21793815838  |
| 48 | 261.109703 | 35367409355  |
| 49 | 262.137067 | 22741301856  |
| 50 | 262.244809 | 74830529404  |
| 51 | 262.388396 | 21559497486  |
| 52 | 263.106683 | 21604265708  |
| 53 | 271.247141 | 22343773631  |
| 54 | 271.284799 | 26430818534  |
| 55 | 275.478351 | 22176215147  |
| 56 | 278.622238 | 22554890104  |
| 57 | 278.863296 | 21873784663  |
| 58 | 285.577418 | 23300115193  |
| 59 | 285.764296 | 21428256534  |
| 60 | 285.853722 | 24355074507  |
| 61 | 286.666453 | 21473020615  |
| 62 | 289.646349 | 21354084688  |
| 63 | 290.888788 | 22954974980  |
| 64 | 291.104175 | 25765015096  |
| 65 | 291.250817 | 22504901031  |
| 66 | 292.111612 | 28144574501  |
| 67 | 293.595946 | 24040245095  |
| 68 | 294.769659 | 22880656109  |
| 69 | 295.134681 | 21423633176  |
| 70 | 296.140396 | 28551275417  |
| 71 | 297.068742 | 22174353768  |
| 72 | 301.059114 | 22747461034  |
| 73 | 301.075731 | 258778005274 |
| 74 | 302.581251 | 25350831390  |
| 75 | 305.993703 | 24393067160  |
| 76 | 306.127335 | 29833077614  |
| 77 | 308.143055 | 24288386816  |
| 78 | 309.114807 | 38264677426  |
| 79 | 309.149885 | 32387933418  |
| 80 | 310.069757 | 21512298446  |
| 81 | 310.153418 | 22883560715  |
| 82 | 311.180000 | 21766833788  |
| 83 | 312.443399 | 21756766689  |
| 84 | 323.131461 | 23753857272  |

---

# Mass Spectrum List Report

---

| #   | m/z        | I              |
|-----|------------|----------------|
| 85  | 324.138228 | 37389259998    |
| 86  | 325.144822 | 82026318559    |
| 87  | 326.147829 | 39482027529    |
| 88  | 326.150667 | 27213679832    |
| 89  | 326.648665 | 22838780353    |
| 90  | 327.154437 | 26052376153    |
| 91  | 330.495486 | 27462019449    |
| 92  | 332.716359 | 23012425812    |
| 93  | 335.489877 | 24037116980    |
| 94  | 337.631768 | 21532975704    |
| 95  | 343.631701 | 21950188194    |
| 96  | 353.139682 | 22145244558    |
| 97  | 363.075916 | 22440306250    |
| 98  | 369.587775 | 23476889994    |
| 99  | 371.577753 | 24180275251    |
| 100 | 372.156019 | 22058503248    |
| 101 | 374.116150 | 37832805181    |
| 102 | 375.122323 | 77509805568    |
| 103 | 376.128704 | 37782079504    |
| 104 | 377.107213 | 51808870520    |
| 105 | 381.740605 | 22171561128    |
| 106 | 382.217461 | 255734612591   |
| 107 | 382.730942 | 22610613244    |
| 108 | 383.174749 | 23152659979    |
| 109 | 383.223605 | 387821578633   |
| 110 | 383.248450 | 24745335930    |
| 111 | 384.229847 | 380972710282   |
| 112 | 385.236252 | 76602379903    |
| 113 | 386.332095 | 23353411947    |
| 114 | 386.769506 | 23510941080    |
| 115 | 398.242513 | 36361531474    |
| 116 | 423.971766 | 24928654086    |
| 117 | 424.732675 | 27340731718    |
| 118 | 425.197709 | 24579542046    |
| 119 | 425.248825 | 24675292003    |
| 120 | 425.373416 | 25372597717    |
| 121 | 425.451411 | 30327342837    |
| 122 | 425.520828 | 28097973736    |
| 123 | 425.568946 | 26315293601    |
| 124 | 425.610564 | 29115898688    |
| 125 | 425.659384 | 34688323464    |
| 126 | 425.695307 | 34897072131    |
| 127 | 425.743325 | 31194964751    |
| 128 | 425.765872 | 34224170541    |
| 129 | 425.797417 | 35622893311    |
| 130 | 425.836639 | 36514802917    |
| 131 | 425.885177 | 42012634648    |
| 132 | 425.937871 | 46252064162    |
| 133 | 426.030516 | 58337684539    |
| 134 | 426.076084 | 70170592334    |
| 135 | 426.207036 | 8895704146425  |
| 136 | 426.244145 | 225996186502   |
| 137 | 426.460320 | 33466961058    |
| 138 | 426.600130 | 25474889412    |
| 139 | 426.685871 | 24449537605    |
| 140 | 426.719724 | 25727914741    |
| 141 | 426.757445 | 27310395535    |
| 142 | 426.849661 | 32037022008    |
| 143 | 426.910807 | 41904403331    |
| 144 | 427.213168 | 12052241498134 |
| 145 | 427.519144 | 42916751380    |
| 146 | 427.580141 | 41135192752    |
| 147 | 427.624805 | 37229415975    |
| 148 | 427.704137 | 37639178519    |

---

# Mass Spectrum List Report

---

| #   | m/z        | I             |
|-----|------------|---------------|
| 149 | 427.758142 | 30927701400   |
| 150 | 427.834064 | 26932503490   |
| 151 | 427.894802 | 29240236498   |
| 152 | 427.927786 | 30626829407   |
| 153 | 427.955638 | 27870478952   |
| 154 | 428.050459 | 24623877000   |
| 155 | 428.211863 | 123981157211  |
| 156 | 428.218842 | 2068191029342 |
| 157 | 428.253537 | 62103765707   |
| 158 | 428.354165 | 29769649044   |
| 159 | 428.398498 | 40403123397   |
| 160 | 428.553449 | 26330086227   |
| 161 | 428.608515 | 26615181362   |
| 162 | 428.696602 | 26631329772   |
| 163 | 428.723241 | 24958720183   |
| 164 | 428.858993 | 25027723918   |
| 165 | 428.910631 | 25597217278   |
| 166 | 428.967739 | 25765638953   |
| 167 | 429.049587 | 27681559961   |
| 168 | 429.132759 | 29783073192   |
| 169 | 429.223223 | 1570715484885 |
| 170 | 429.226236 | 969151633271  |
| 171 | 429.336266 | 32959124692   |
| 172 | 429.456033 | 24494625888   |
| 173 | 429.498487 | 27345048711   |
| 174 | 429.565359 | 23719106185   |
| 175 | 429.602877 | 23701333484   |
| 176 | 430.226798 | 138680690864  |
| 177 | 430.229890 | 171928940716  |
| 178 | 447.496175 | 24609072563   |
| 179 | 448.138414 | 23193284132   |
| 180 | 448.188974 | 595970383380  |
| 181 | 448.553891 | 23841711501   |
| 182 | 449.069507 | 23844486713   |
| 183 | 449.136847 | 39154794105   |
| 184 | 449.195262 | 1325781317994 |
| 185 | 449.284958 | 29381560967   |
| 186 | 450.201556 | 719689172682  |
| 187 | 450.300929 | 23225563262   |
| 188 | 451.205442 | 73296706542   |
| 189 | 454.238846 | 269046778414  |
| 190 | 455.244603 | 570541477840  |
| 191 | 455.280889 | 30170325372   |
| 192 | 456.152910 | 23047043638   |
| 193 | 456.204430 | 24075594220   |
| 194 | 456.250806 | 1096422797435 |
| 195 | 457.254766 | 491796403068  |
| 196 | 457.257785 | 425350182304  |
| 197 | 457.295262 | 34298838404   |
| 198 | 458.261154 | 93124793317   |
| 199 | 462.404221 | 24255449616   |
| 200 | 470.170991 | 134205807911  |
| 201 | 470.303877 | 24708403373   |
| 202 | 471.177194 | 386635922340  |
| 203 | 471.307279 | 24810589560   |
| 204 | 472.180256 | 83006574261   |
| 205 | 472.183773 | 147535885804  |
| 206 | 473.186836 | 40159446745   |
| 207 | 477.180868 | 36939163183   |
| 208 | 477.227178 | 32829160024   |
| 209 | 478.232917 | 56357256290   |
| 210 | 478.445726 | 25736649915   |
| 211 | 479.239592 | 26711607497   |
| 212 | 482.268183 | 24947854797   |

---

## Mass Spectrum List Report

---

| #   | m/z        | I            |
|-----|------------|--------------|
| 213 | 483.276358 | 83438711670  |
| 214 | 484.283209 | 49083281952  |
| 215 | 485.282330 | 29199564758  |
| 216 | 489.521523 | 23049177724  |
| 217 | 493.175608 | 665769889904 |
| 218 | 493.225942 | 24334832503  |
| 219 | 493.271518 | 22574141696  |
| 220 | 494.179036 | 112433681227 |
| 221 | 494.801205 | 22523346570  |
| 222 | 499.176857 | 22815681852  |
| 223 | 503.841413 | 22919789863  |
| 224 | 508.582455 | 62917606380  |
| 225 | 523.325386 | 37238911593  |
| 226 | 525.376480 | 27829206965  |
| 227 | 529.248308 | 24150834932  |
| 228 | 536.614141 | 405304917340 |
| 229 | 537.617249 | 88361679588  |
| 230 | 549.196694 | 24752704605  |
| 231 | 552.609508 | 33419898184  |
| 232 | 559.134806 | 22358699198  |
| 233 | 561.243866 | 23336033234  |
| 234 | 564.645897 | 78018079988  |
| 235 | 565.649326 | 31115187964  |
| 236 | 569.207352 | 91925868904  |
| 237 | 572.527287 | 22990152929  |
| 238 | 579.110940 | 36812813294  |
| 239 | 579.162373 | 539689257142 |
| 240 | 580.165915 | 143299381984 |
| 241 | 587.577291 | 22704439049  |
| 242 | 588.027381 | 22945434029  |
| 243 | 592.677540 | 83738805755  |
| 244 | 592.978760 | 23007331302  |
| 245 | 593.681128 | 22836245011  |
| 246 | 597.207716 | 32738273916  |
| 247 | 621.596572 | 24770493434  |
| 248 | 626.780552 | 23483740915  |
| 249 | 647.283094 | 31782664271  |
| 250 | 647.302564 | 30553764847  |
| 251 | 648.309205 | 32899858310  |
| 252 | 655.194194 | 40808717726  |
| 253 | 659.568554 | 24786671625  |
| 254 | 674.358716 | 23366675812  |
| 255 | 674.986986 | 26308459525  |
| 256 | 685.437710 | 24833175182  |
| 257 | 711.362407 | 27692166399  |
| 258 | 717.266780 | 25940194985  |
| 259 | 747.811329 | 23240858521  |
| 260 | 757.487345 | 25756800702  |
| 261 | 836.397524 | 24041956398  |
| 262 | 836.604609 | 24429191817  |
| 263 | 871.489501 | 23275150855  |
| 264 | 883.562371 | 23140730157  |
| 265 | 953.529998 | 24268779150  |

NGJ-9-028-1 (400MHz, CDC13) Pure Yellow Oil - saponification of carboxazole quinoline

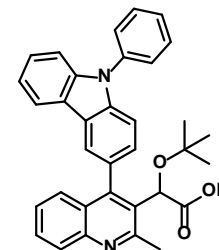

NAME NGJ-9-028-1  
 EXPNO 10  
 PROCNO 1  
 Date\_ 20180219  
 Time\_ 21.59 h  
 INSTRUM spect  
 PROBHD Z108618\_0161 ( )  
 PULPROG zg30  
 TD 65536  
 SOLVENT CDC13  
 NS 16  
 DS 2  
 SWH 8012.820 Hz  
 FIDRES 0.244532 Hz  
 AQ 4.0894966 sec  
 RG 71.8  
 DW 62.400 usec  
 DE 6.50 usec  
 TE 298.3 K  
 D1 1.00000000 sec  
 TD0 1  
 SFO1 400.1724710 MHz  
 NUC1 1H  
 P1 9.88 usec  
 SI 65536  
 SF 400.1700149 MHz  
 WDW EM  
 SSB 0  
 LB 0.30 Hz  
 GB 0  
 PC 1.00

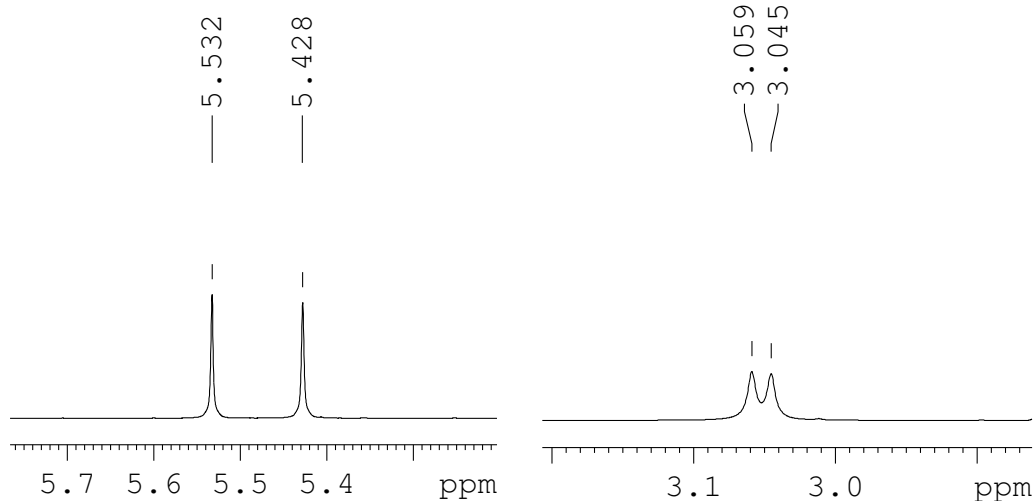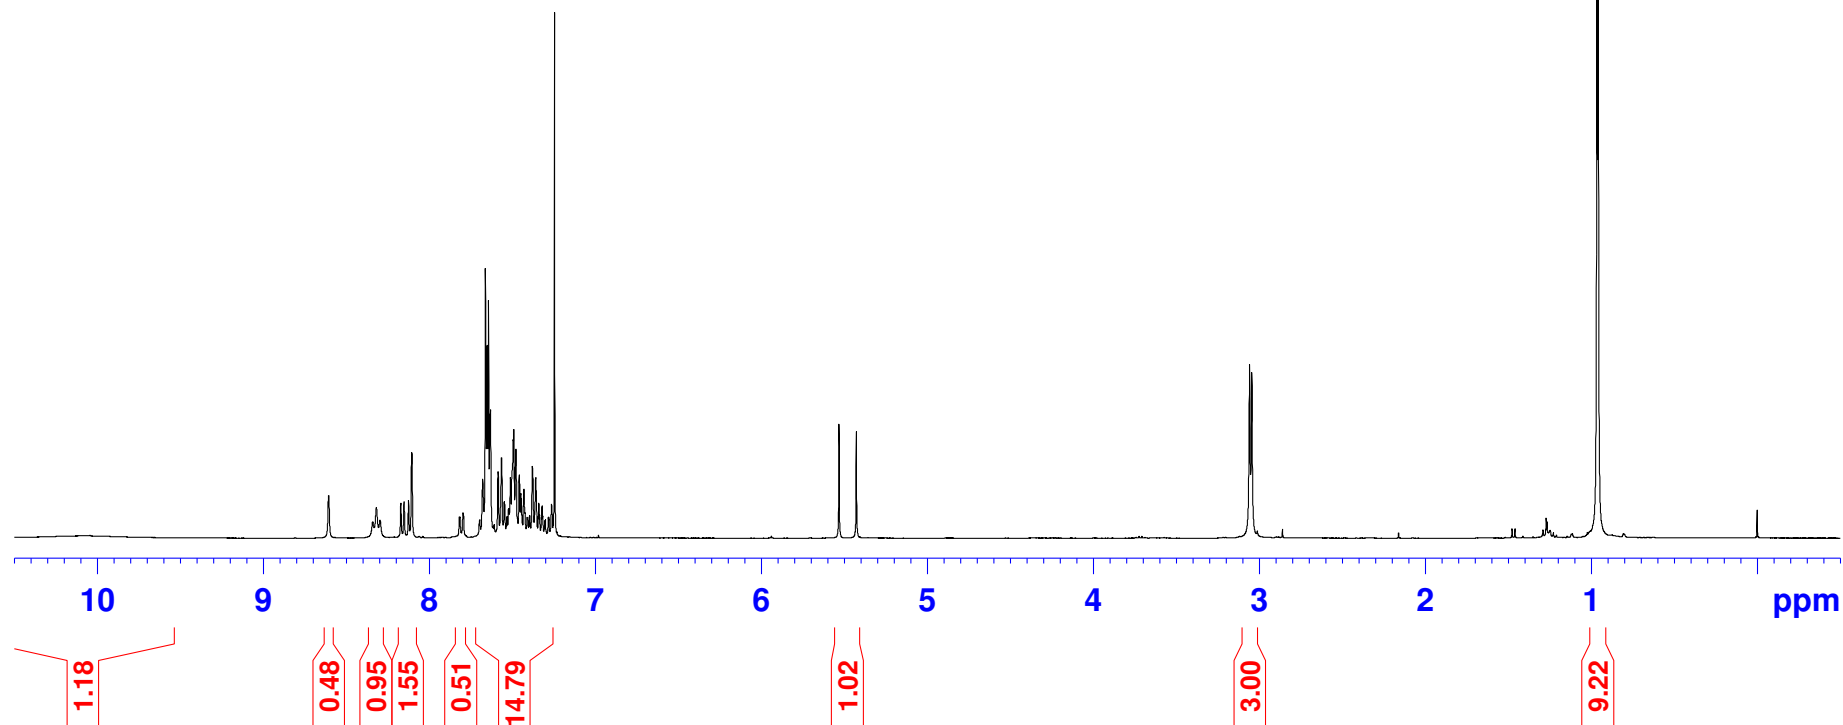



NGJ-9-028-1 (400MHz, CDCl3) Pure Yellow Oil - saponification of carboxazole quinoline

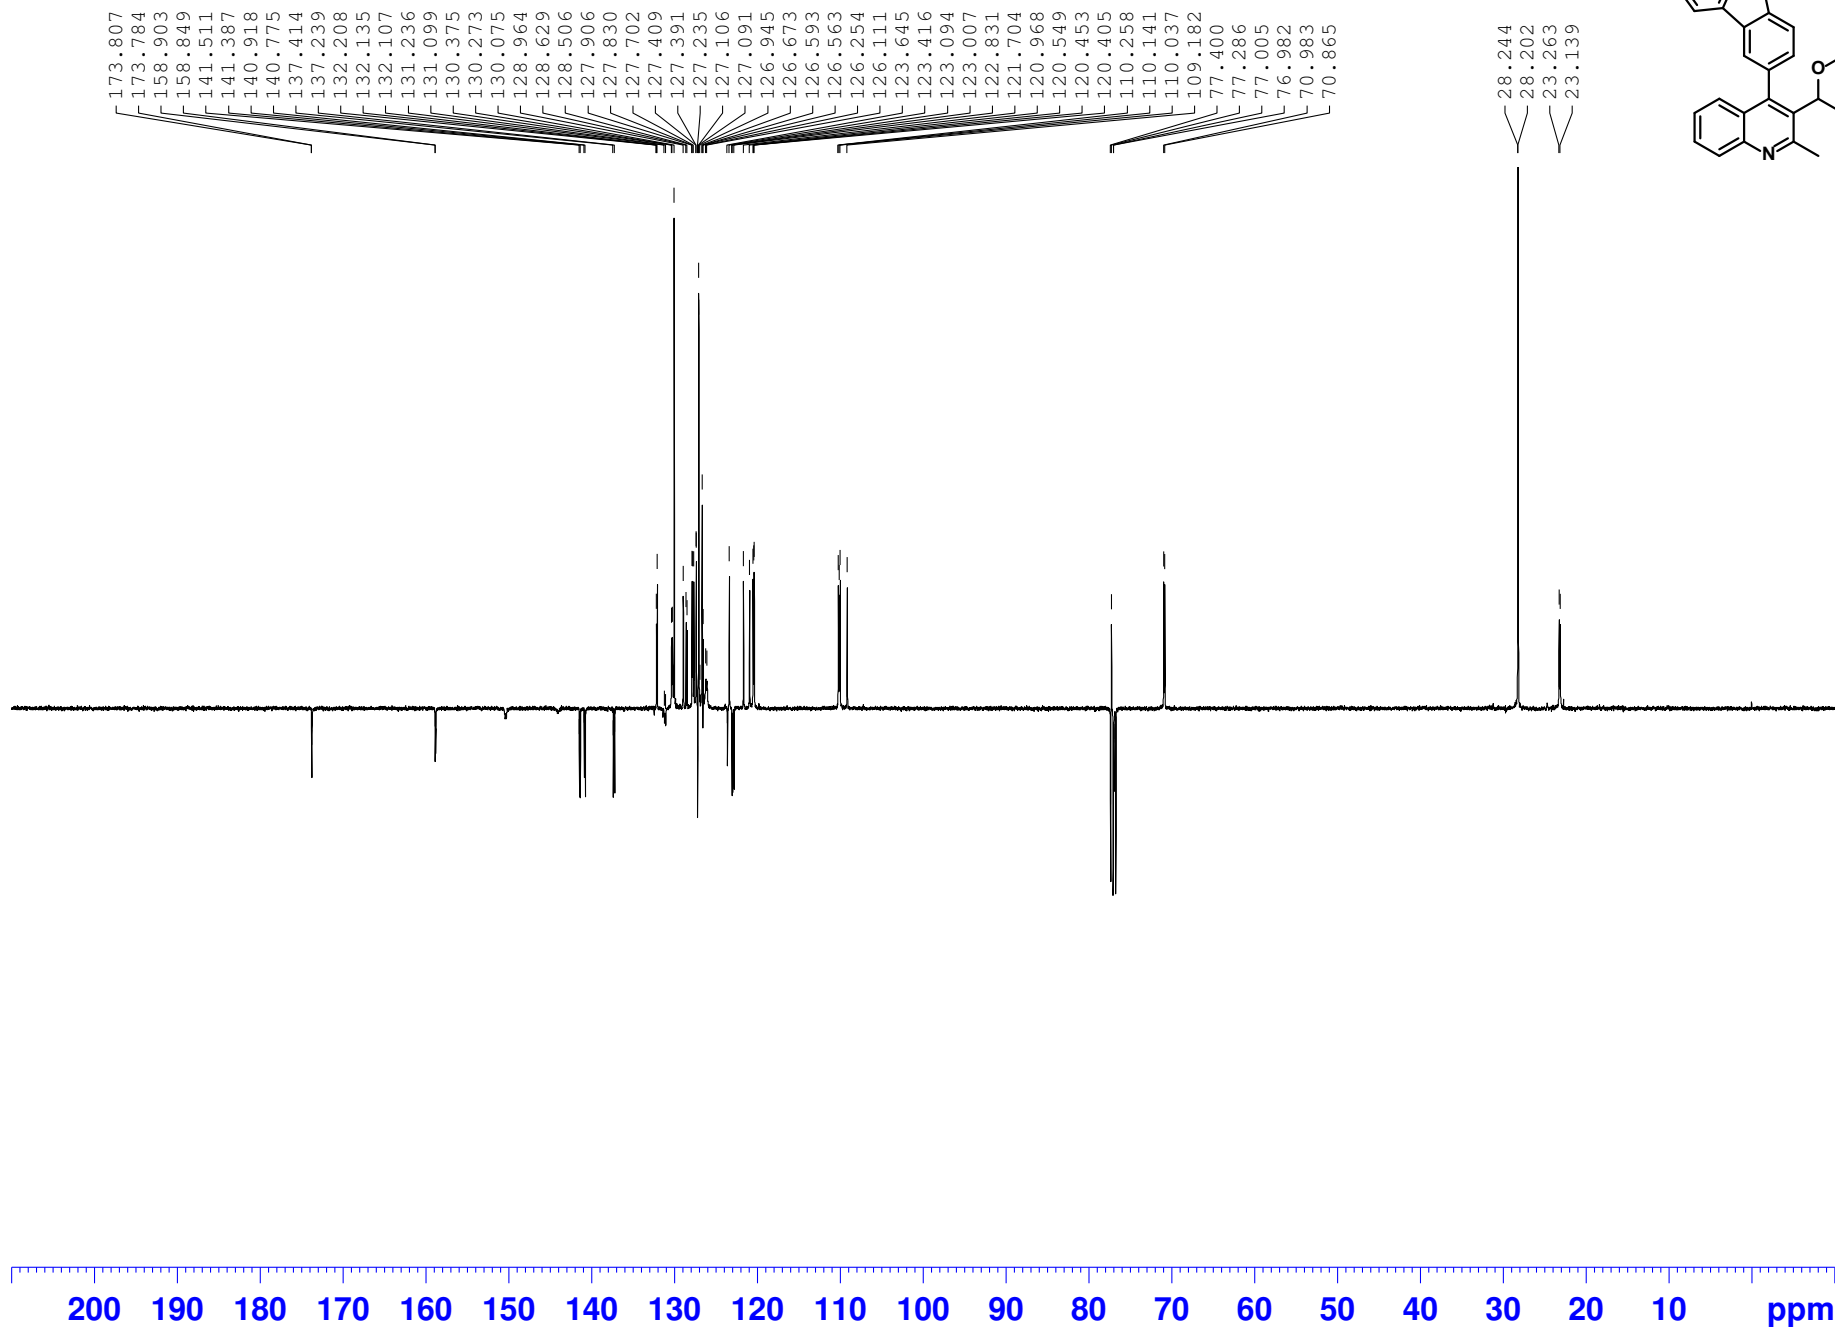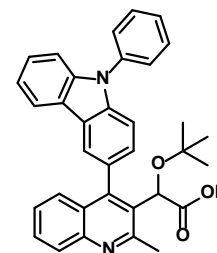

# Mass Spectrum List Report

## Analysis Info

Analysis Name F:\MS1-091514 - 080917\Data\apexdata031918\NGJ-9-028\_pos\_000001.d  
Method  
Sample Name NGJ-9-028  
Comment NGJ-9-028 in THF:MeOH C34H30N2O3 H+

Acquisition Date 3/19/2018 3:36:15 PM  
Operator FTMS\_USER  
Instrument apex-Qe

Sample Name NGJ-9-028 in THF:MeOH  
Exact Mass of C34H30N2O3 H+ = 515.232919 m/z  
Mass Observed = 515.233267 m/z

Difference < 1.0 ppm

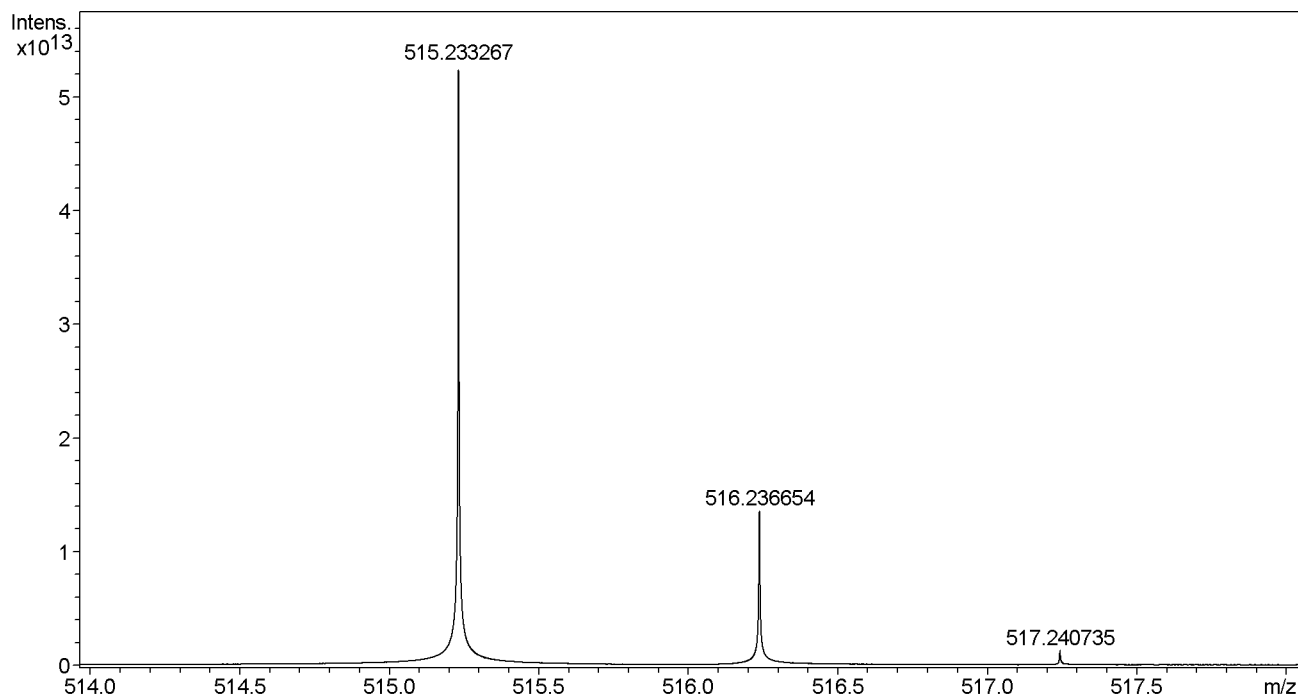

| #  | m/z        | I             |
|----|------------|---------------|
| 1  | 184.313315 | 23790647788   |
| 2  | 186.149630 | 21225329637   |
| 3  | 186.640907 | 24021462437   |
| 4  | 188.587707 | 21645158821   |
| 5  | 189.006973 | 23781227672   |
| 6  | 190.448227 | 21340957900   |
| 7  | 192.165680 | 22460859905   |
| 8  | 193.279608 | 22087961660   |
| 9  | 194.789516 | 21783952854   |
| 10 | 197.069244 | 23195469943   |
| 11 | 198.073902 | 21734427815   |
| 12 | 198.382199 | 120156427615  |
| 13 | 198.679509 | 28014348369   |
| 14 | 198.828596 | 1066124637173 |
| 15 | 198.829708 | 188027696017  |
| 16 | 198.830488 | 83723342669   |
| 17 | 201.720161 | 21995204486   |
| 18 | 202.161876 | 22307935887   |
| 19 | 202.340550 | 421670441690  |
| 20 | 202.350521 | 21061190337   |

---

# Mass Spectrum List Report

---

| #  | m/z        | I            |
|----|------------|--------------|
| 21 | 202.572712 | 22590813110  |
| 22 | 206.098154 | 27238754410  |
| 23 | 206.258583 | 50812370841  |
| 24 | 207.077786 | 22167323219  |
| 25 | 208.019252 | 22341503177  |
| 26 | 210.036066 | 28180410408  |
| 27 | 210.998146 | 21423732534  |
| 28 | 212.648915 | 21965184292  |
| 29 | 220.009219 | 21978025534  |
| 30 | 222.248945 | 98889877273  |
| 31 | 222.783272 | 21548977111  |
| 32 | 222.918941 | 24904546712  |
| 33 | 222.919450 | 38863715192  |
| 34 | 224.453389 | 26809210482  |
| 35 | 230.987447 | 22806416798  |
| 36 | 231.120686 | 59036466595  |
| 37 | 231.923360 | 25221443918  |
| 38 | 233.285310 | 22944524442  |
| 39 | 234.056187 | 22412451906  |
| 40 | 235.626188 | 93823380977  |
| 41 | 236.128039 | 51602219309  |
| 42 | 236.896411 | 22612762160  |
| 43 | 237.536396 | 23340528257  |
| 44 | 238.911542 | 23339441235  |
| 45 | 241.088869 | 21685455512  |
| 46 | 241.227297 | 23162167762  |
| 47 | 242.223489 | 21792766220  |
| 48 | 244.618032 | 21220341076  |
| 49 | 245.285979 | 22399480954  |
| 50 | 246.062083 | 21298338933  |
| 51 | 253.680223 | 21212525734  |
| 52 | 255.078308 | 21608748103  |
| 53 | 257.620733 | 70700238417  |
| 54 | 257.621808 | 252111750992 |
| 55 | 258.123581 | 96081651046  |
| 56 | 259.617447 | 23769699183  |
| 57 | 266.571663 | 22680802676  |
| 58 | 267.138147 | 24274042833  |
| 59 | 267.383338 | 21622710942  |
| 60 | 269.262101 | 21919775893  |
| 61 | 269.417638 | 23169368681  |
| 62 | 269.959467 | 24883514079  |
| 63 | 270.235019 | 22478652217  |
| 64 | 270.265866 | 22087115738  |
| 65 | 270.521004 | 21351335708  |
| 66 | 273.798146 | 22525797969  |
| 67 | 275.697920 | 22218192110  |
| 68 | 277.746818 | 21821960232  |
| 69 | 279.555611 | 23022375099  |
| 70 | 281.474884 | 22415708587  |
| 71 | 283.562933 | 38851434101  |
| 72 | 285.965673 | 22460726845  |
| 73 | 286.865820 | 21599944855  |
| 74 | 290.849776 | 21486577747  |
| 75 | 292.887769 | 22547651828  |
| 76 | 295.117461 | 22461587058  |
| 77 | 295.521311 | 21331079625  |
| 78 | 295.671420 | 22528676397  |
| 79 | 296.438476 | 22246593074  |
| 80 | 298.208600 | 25058428732  |
| 81 | 300.060596 | 23443112066  |
| 82 | 301.075863 | 81449844484  |
| 83 | 312.205204 | 21365002074  |
| 84 | 317.121303 | 22265981007  |

---

# Mass Spectrum List Report

---

| #   | m/z        | I           |
|-----|------------|-------------|
| 85  | 318.115502 | 26368479270 |
| 86  | 319.122698 | 21614448947 |
| 87  | 323.764223 | 23072298374 |
| 88  | 330.759791 | 21534093484 |
| 89  | 338.623164 | 21777821479 |
| 90  | 341.415139 | 23011082745 |
| 91  | 344.894285 | 22785443709 |
| 92  | 345.889823 | 21749062993 |
| 93  | 347.858121 | 22107724772 |
| 94  | 351.554147 | 22358588270 |
| 95  | 360.324478 | 28800364155 |
| 96  | 365.107126 | 22218175179 |
| 97  | 366.116143 | 24128829446 |
| 98  | 366.377858 | 22121250942 |
| 99  | 367.123298 | 25140003734 |
| 100 | 368.130216 | 22570079146 |
| 101 | 369.051023 | 23620627584 |
| 102 | 369.138869 | 30314503196 |
| 103 | 380.130082 | 37727631995 |
| 104 | 381.135475 | 24649463203 |
| 105 | 381.139174 | 22263135746 |
| 106 | 382.146654 | 32123011119 |
| 107 | 383.150025 | 28734143120 |
| 108 | 383.154046 | 24035175463 |
| 109 | 386.497443 | 22618616532 |
| 110 | 386.573855 | 22014679044 |
| 111 | 389.394804 | 26451821192 |
| 112 | 394.204214 | 22910641889 |
| 113 | 395.154721 | 25021293698 |
| 114 | 396.160801 | 37645479853 |
| 115 | 397.170334 | 90025107158 |
| 116 | 397.942827 | 21618144121 |
| 117 | 398.172745 | 39249098097 |
| 118 | 398.242357 | 72549990378 |
| 119 | 402.123474 | 23620457490 |
| 120 | 404.693354 | 21775615656 |
| 121 | 406.589516 | 23876759648 |
| 122 | 411.149382 | 39405608382 |
| 123 | 412.157154 | 34701739257 |
| 124 | 413.165909 | 76517048034 |
| 125 | 416.183199 | 26212955152 |
| 126 | 417.998101 | 21884743672 |
| 127 | 419.152918 | 37729794593 |
| 128 | 419.607111 | 22414731072 |
| 129 | 425.288423 | 29069600311 |
| 130 | 425.550924 | 22617328137 |
| 131 | 427.757017 | 23071209786 |
| 132 | 429.160468 | 24913312018 |
| 133 | 435.257987 | 23481826874 |
| 134 | 435.345650 | 37646493526 |
| 135 | 442.010871 | 23547666342 |
| 136 | 459.170644 | 39937665955 |
| 137 | 463.635575 | 25703205599 |
| 138 | 469.238904 | 26624945926 |
| 139 | 469.467015 | 26810619559 |
| 140 | 469.760339 | 27389932187 |
| 141 | 469.966786 | 29198133248 |
| 142 | 470.029077 | 35974106412 |
| 143 | 470.062391 | 27724983781 |
| 144 | 470.121421 | 28664012811 |
| 145 | 470.210955 | 31084557279 |
| 146 | 470.235266 | 36886011601 |
| 147 | 470.314087 | 34084101357 |
| 148 | 470.365339 | 33891449798 |

---

# Mass Spectrum List Report

---

| #   | m/z        | I              |
|-----|------------|----------------|
| 149 | 470.471385 | 38084931613    |
| 150 | 470.507860 | 35415052175    |
| 151 | 470.547408 | 41733976257    |
| 152 | 470.631841 | 46939784083    |
| 153 | 470.679814 | 50563263058    |
| 154 | 470.717630 | 47495508526    |
| 155 | 470.764850 | 49974422610    |
| 156 | 470.994890 | 89952756505    |
| 157 | 471.243709 | 17691328221541 |
| 158 | 471.640492 | 50886805039    |
| 159 | 471.765698 | 36588041192    |
| 160 | 471.805195 | 34391728009    |
| 161 | 471.900346 | 26762597368    |
| 162 | 472.038952 | 30228177491    |
| 163 | 472.112601 | 34934943428    |
| 164 | 472.247258 | 5989204513329  |
| 165 | 472.370495 | 72115334432    |
| 166 | 472.561627 | 42237299635    |
| 167 | 472.692847 | 40966584447    |
| 168 | 472.805935 | 36558990403    |
| 169 | 472.854642 | 29880929031    |
| 170 | 473.250984 | 660812038856   |
| 171 | 473.410152 | 30978163899    |
| 172 | 473.515780 | 27573177963    |
| 173 | 473.543863 | 30881294957    |
| 174 | 473.668325 | 26585846945    |
| 175 | 473.908534 | 26855349587    |
| 176 | 474.154072 | 27415305405    |
| 177 | 474.198107 | 27195234631    |
| 178 | 474.254487 | 46082949685    |
| 179 | 475.156253 | 29297164381    |
| 180 | 476.843585 | 30239736463    |
| 181 | 485.223575 | 187131574178   |
| 182 | 486.226963 | 53893484525    |
| 183 | 487.239268 | 82961950418    |
| 184 | 488.242707 | 33718401625    |
| 185 | 493.176511 | 30700200803    |
| 186 | 493.226599 | 42287794131    |
| 187 | 501.254985 | 177652906388   |
| 188 | 502.258389 | 45403141187    |
| 189 | 503.233986 | 1998043445465  |
| 190 | 504.237589 | 548467256486   |
| 191 | 504.388525 | 30998207381    |
| 192 | 505.241169 | 43839177724    |
| 193 | 505.732639 | 29303159805    |
| 194 | 507.138653 | 33422392207    |
| 195 | 507.718611 | 27852222889    |
| 196 | 508.054936 | 27908469677    |
| 197 | 508.582946 | 52951062807    |
| 198 | 509.586650 | 41201184200    |
| 199 | 509.621091 | 29778858122    |
| 200 | 509.800176 | 29567788619    |
| 201 | 509.900333 | 28786217320    |
| 202 | 510.212525 | 30847201293    |
| 203 | 510.516617 | 28799323870    |
| 204 | 510.741464 | 28092506403    |
| 205 | 510.908186 | 29268210067    |
| 206 | 511.004559 | 33902052265    |
| 207 | 511.103259 | 30708292222    |
| 208 | 511.260353 | 31403781796    |
| 209 | 511.323676 | 30479623053    |
| 210 | 511.372503 | 29942953498    |
| 211 | 511.477685 | 33286058565    |
| 212 | 511.651404 | 30732947488    |

---

# Mass Spectrum List Report

---

| #   | m/z        | I              |
|-----|------------|----------------|
| 213 | 511.726612 | 30910976301    |
| 214 | 511.743147 | 31445463399    |
| 215 | 511.850428 | 43657396371    |
| 216 | 511.955130 | 36378081747    |
| 217 | 512.084887 | 32405515143    |
| 218 | 512.205835 | 43911101039    |
| 219 | 512.290646 | 36087251268    |
| 220 | 512.408020 | 39443213552    |
| 221 | 512.485641 | 39035822558    |
| 222 | 512.578141 | 40843336783    |
| 223 | 512.795392 | 41166864942    |
| 224 | 512.893877 | 40877650355    |
| 225 | 512.911178 | 43010933577    |
| 226 | 513.086114 | 43518776160    |
| 227 | 513.402412 | 53290056971    |
| 228 | 513.462383 | 52426995266    |
| 229 | 513.682342 | 60568833115    |
| 230 | 513.722211 | 63741746781    |
| 231 | 513.861982 | 65471622846    |
| 232 | 513.904032 | 64758791386    |
| 233 | 513.942741 | 65150594770    |
| 234 | 514.017114 | 67286828225    |
| 235 | 514.057754 | 71642264206    |
| 236 | 514.118578 | 71437655437    |
| 237 | 514.208580 | 84337925190    |
| 238 | 514.294861 | 81629827617    |
| 239 | 514.337651 | 88938712707    |
| 240 | 514.583974 | 112335058526   |
| 241 | 515.233267 | 52738732711001 |
| 242 | 515.927500 | 66272738995    |
| 243 | 516.003948 | 66925539691    |
| 244 | 516.236654 | 13601925041960 |
| 245 | 516.752268 | 79825376743    |
| 246 | 516.830390 | 75105442801    |
| 247 | 516.992000 | 70991293630    |
| 248 | 517.240735 | 1287723358418  |
| 249 | 517.416987 | 57432714631    |
| 250 | 517.451914 | 56451955307    |
| 251 | 517.471732 | 45329027719    |
| 252 | 517.548391 | 56404741552    |
| 253 | 517.590851 | 47525350071    |
| 254 | 517.676268 | 49866978745    |
| 255 | 517.837215 | 45475251103    |
| 256 | 517.934820 | 43095159060    |
| 257 | 517.967290 | 41740803867    |
| 258 | 518.032301 | 42043859093    |
| 259 | 518.238615 | 40890478212    |
| 260 | 518.244584 | 71593855034    |
| 261 | 518.356630 | 37270193464    |
| 262 | 518.517726 | 35917447574    |
| 263 | 518.664480 | 37174780666    |
| 264 | 518.743721 | 32958702712    |
| 265 | 518.801044 | 32265764421    |
| 266 | 518.839915 | 32884013193    |
| 267 | 518.877004 | 33282052560    |
| 268 | 518.974447 | 33204723543    |
| 269 | 519.137250 | 32683988165    |
| 270 | 519.247702 | 31806580444    |
| 271 | 519.322980 | 31852089975    |
| 272 | 519.393035 | 28249058875    |
| 273 | 519.514794 | 32306744773    |
| 274 | 519.875775 | 29141073643    |
| 275 | 520.243836 | 28234073994    |
| 276 | 520.319132 | 28453778934    |

---

## Mass Spectrum List Report

---

| #   | m/z        | I             |
|-----|------------|---------------|
| 277 | 520.507841 | 28441485356   |
| 278 | 520.677622 | 27982966490   |
| 279 | 520.845643 | 28990831448   |
| 280 | 520.873677 | 27948004603   |
| 281 | 521.772879 | 29231717105   |
| 282 | 523.213276 | 28113777983   |
| 283 | 524.577832 | 39247308360   |
| 284 | 530.385010 | 29310251018   |
| 285 | 530.774117 | 27752618792   |
| 286 | 531.229171 | 53172661421   |
| 287 | 536.614352 | 263336375105  |
| 288 | 537.215928 | 1440272010599 |
| 289 | 537.618178 | 59105585990   |
| 290 | 538.219610 | 342957211051  |
| 291 | 539.223151 | 33338888412   |
| 292 | 543.265834 | 80515404013   |
| 293 | 544.268956 | 30373084603   |
| 294 | 552.609600 | 95407561608   |
| 295 | 553.613031 | 38653830484   |
| 296 | 557.317948 | 41782751401   |
| 297 | 559.198525 | 96857121958   |
| 298 | 564.645988 | 45480790623   |
| 299 | 565.649459 | 27531293522   |
| 300 | 568.281159 | 29504655239   |
| 301 | 571.297476 | 90220043505   |
| 302 | 572.301017 | 25842658270   |
| 303 | 579.163299 | 74547520954   |
| 304 | 592.677437 | 73628729944   |
| 305 | 599.550457 | 25190186729   |
| 306 | 606.907324 | 23459957465   |
| 307 | 622.040045 | 22798040659   |
| 308 | 631.306158 | 23032579177   |
| 309 | 677.673357 | 23022897393   |
| 310 | 685.437685 | 22956327685   |
| 311 | 715.830148 | 22516639822   |
| 312 | 732.918915 | 25485224119   |
| 313 | 794.170158 | 24406180476   |
| 314 | 852.979823 | 24539643413   |
| 315 | 871.215513 | 24515290086   |
| 316 | 878.112390 | 24148209665   |

# AH-3-46 characterization

NAME AH-3-46  
EXPNO 30  
PROCNO 1  
Date\_ 20171126  
Time\_ 14.48 h  
INSTRUM spect  
PROBHD Z108618\_0161 (  
PULPROG zg30  
TD 65536  
SOLVENT CD3OD\_SPE  
NS 16  
DS 2  
SWH 8012.820 Hz  
FIDRES 0.244532 Hz  
AQ 4.0894966 sec  
RG 90.5  
DW 62.400 usec  
DE 6.50 usec  
TE 298.2 K  
D1 1.00000000 sec  
TD0 1  
SF01 400.1724710 MHz  
NUC1 1H  
P1 9.88 usec  
SI 65536  
SF 400.1700110 MHz  
WDW EM  
SSB 0  
LB 0.30 Hz  
GB 0  
PC 1.00

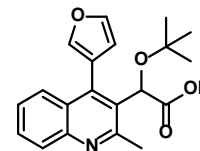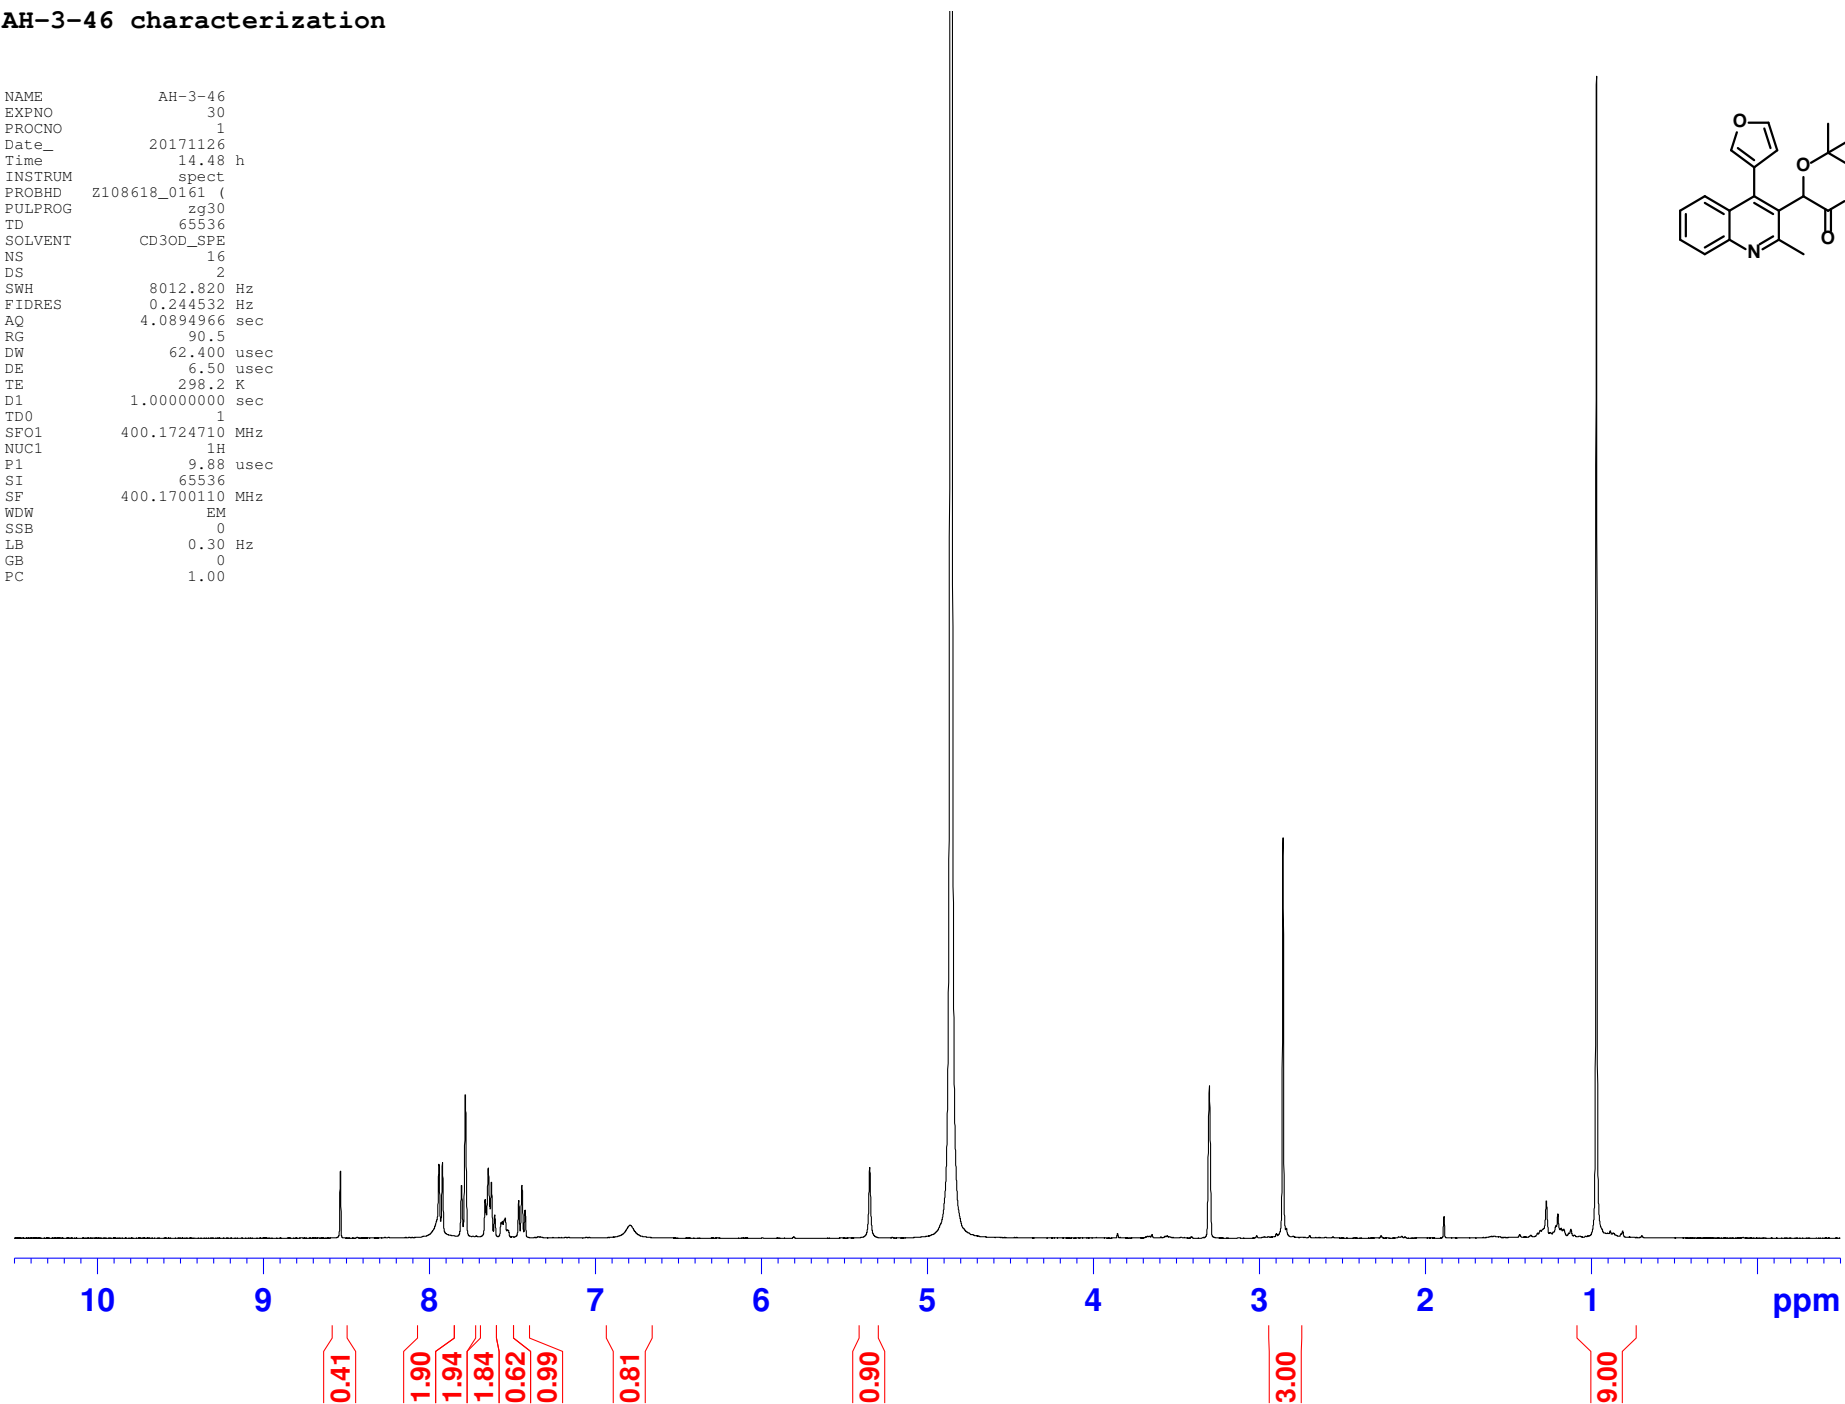



AH-3-46 Characterization

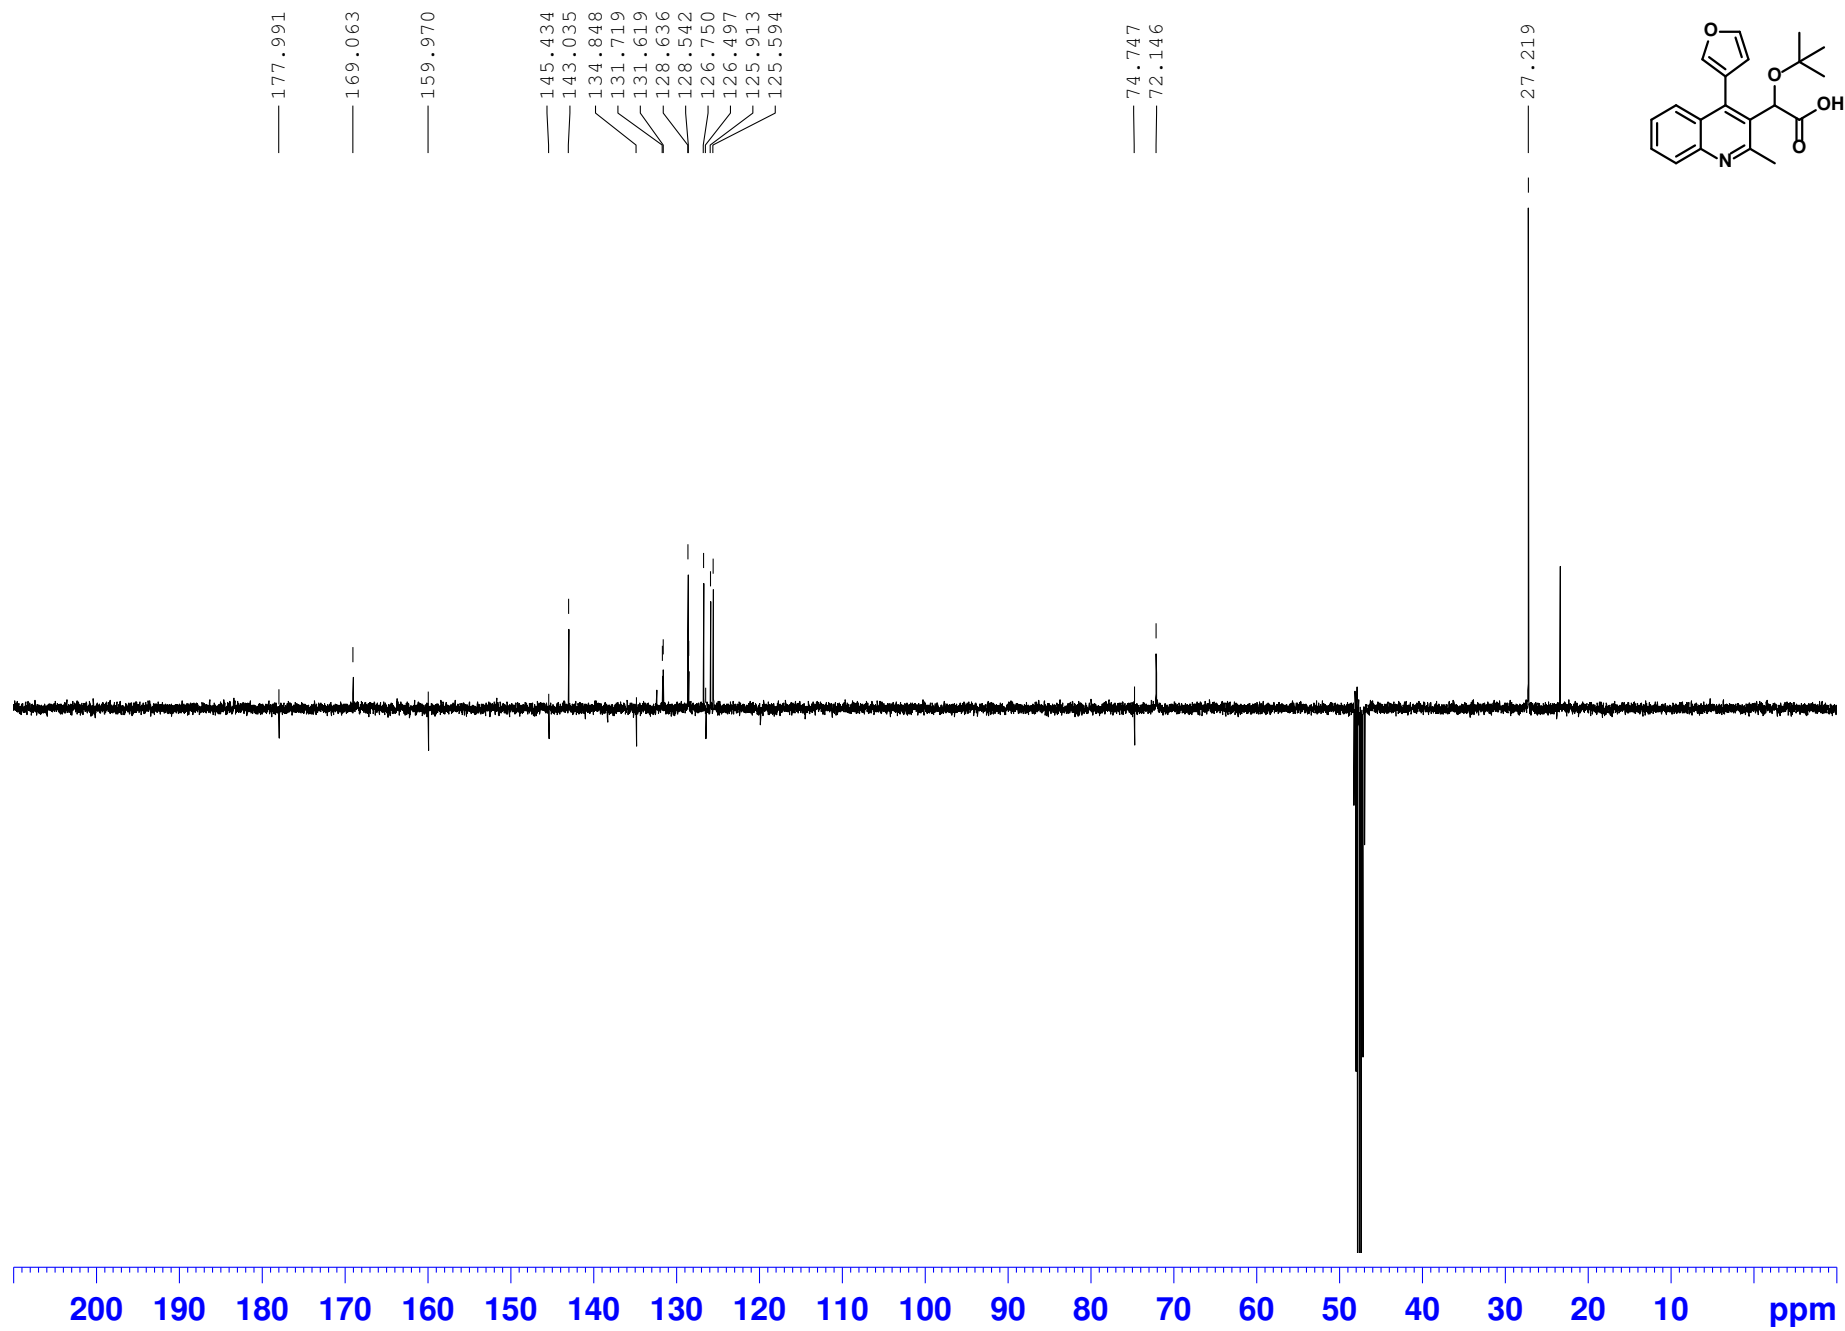

AH-3-55A characterization (CDC13, 400MHz)

MISSISS

NAME AH-3-55  
EXPNO 20  
PROCNO 1  
Date\_ 20171130  
Time 22.52 h  
INSTRUM spect  
PROBHD z108618\_0161 (  
PULPROG zg30  
TD 65536  
SOLVENT CDC13  
NS 16  
DS 2  
SWH 8012.820 Hz  
FIDRES 0.244532 Hz  
AQ 4.0894966 sec  
RG 203  
DW 62.400 usec  
DE 6.50 usec  
TE 298.2 K  
D1 1.00000000 sec  
TDO 1  
SFO1 400.1724710 MHz  
NUC1 1H  
P1 9.88 usec  
SI 65536  
SF 400.1700087 MHz  
WDW EM  
SSB 0  
LB 0.30 Hz  
GB 0  
PC 1.00

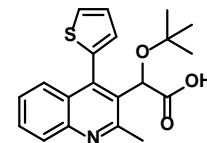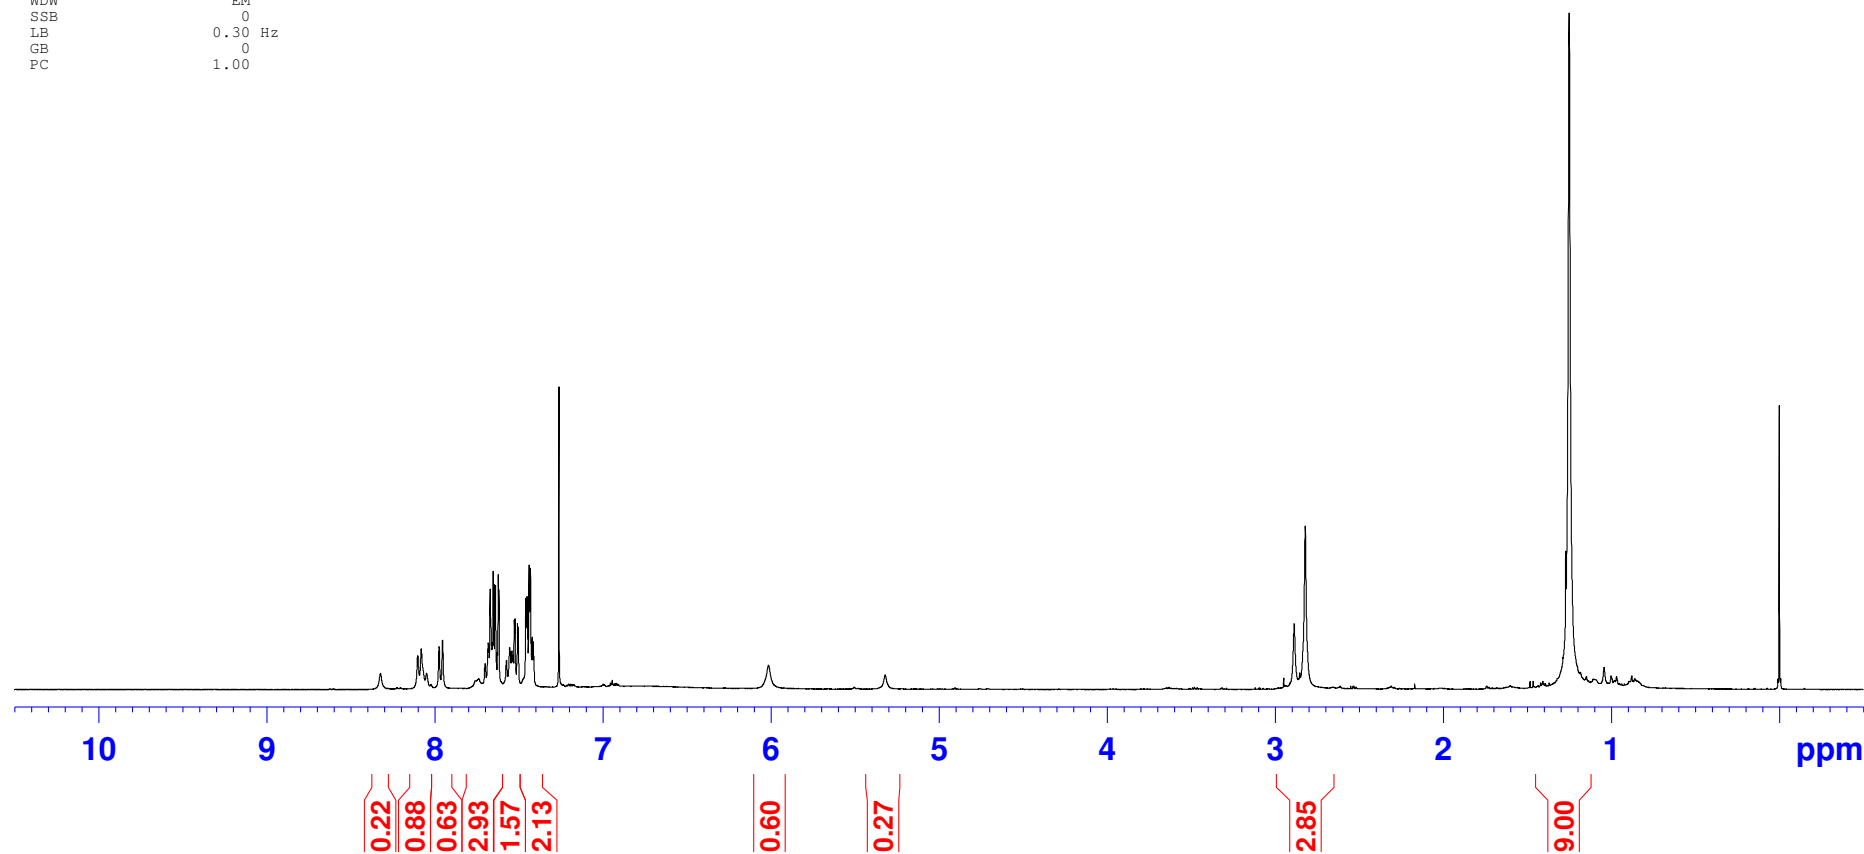

AH-3-55 Characterization

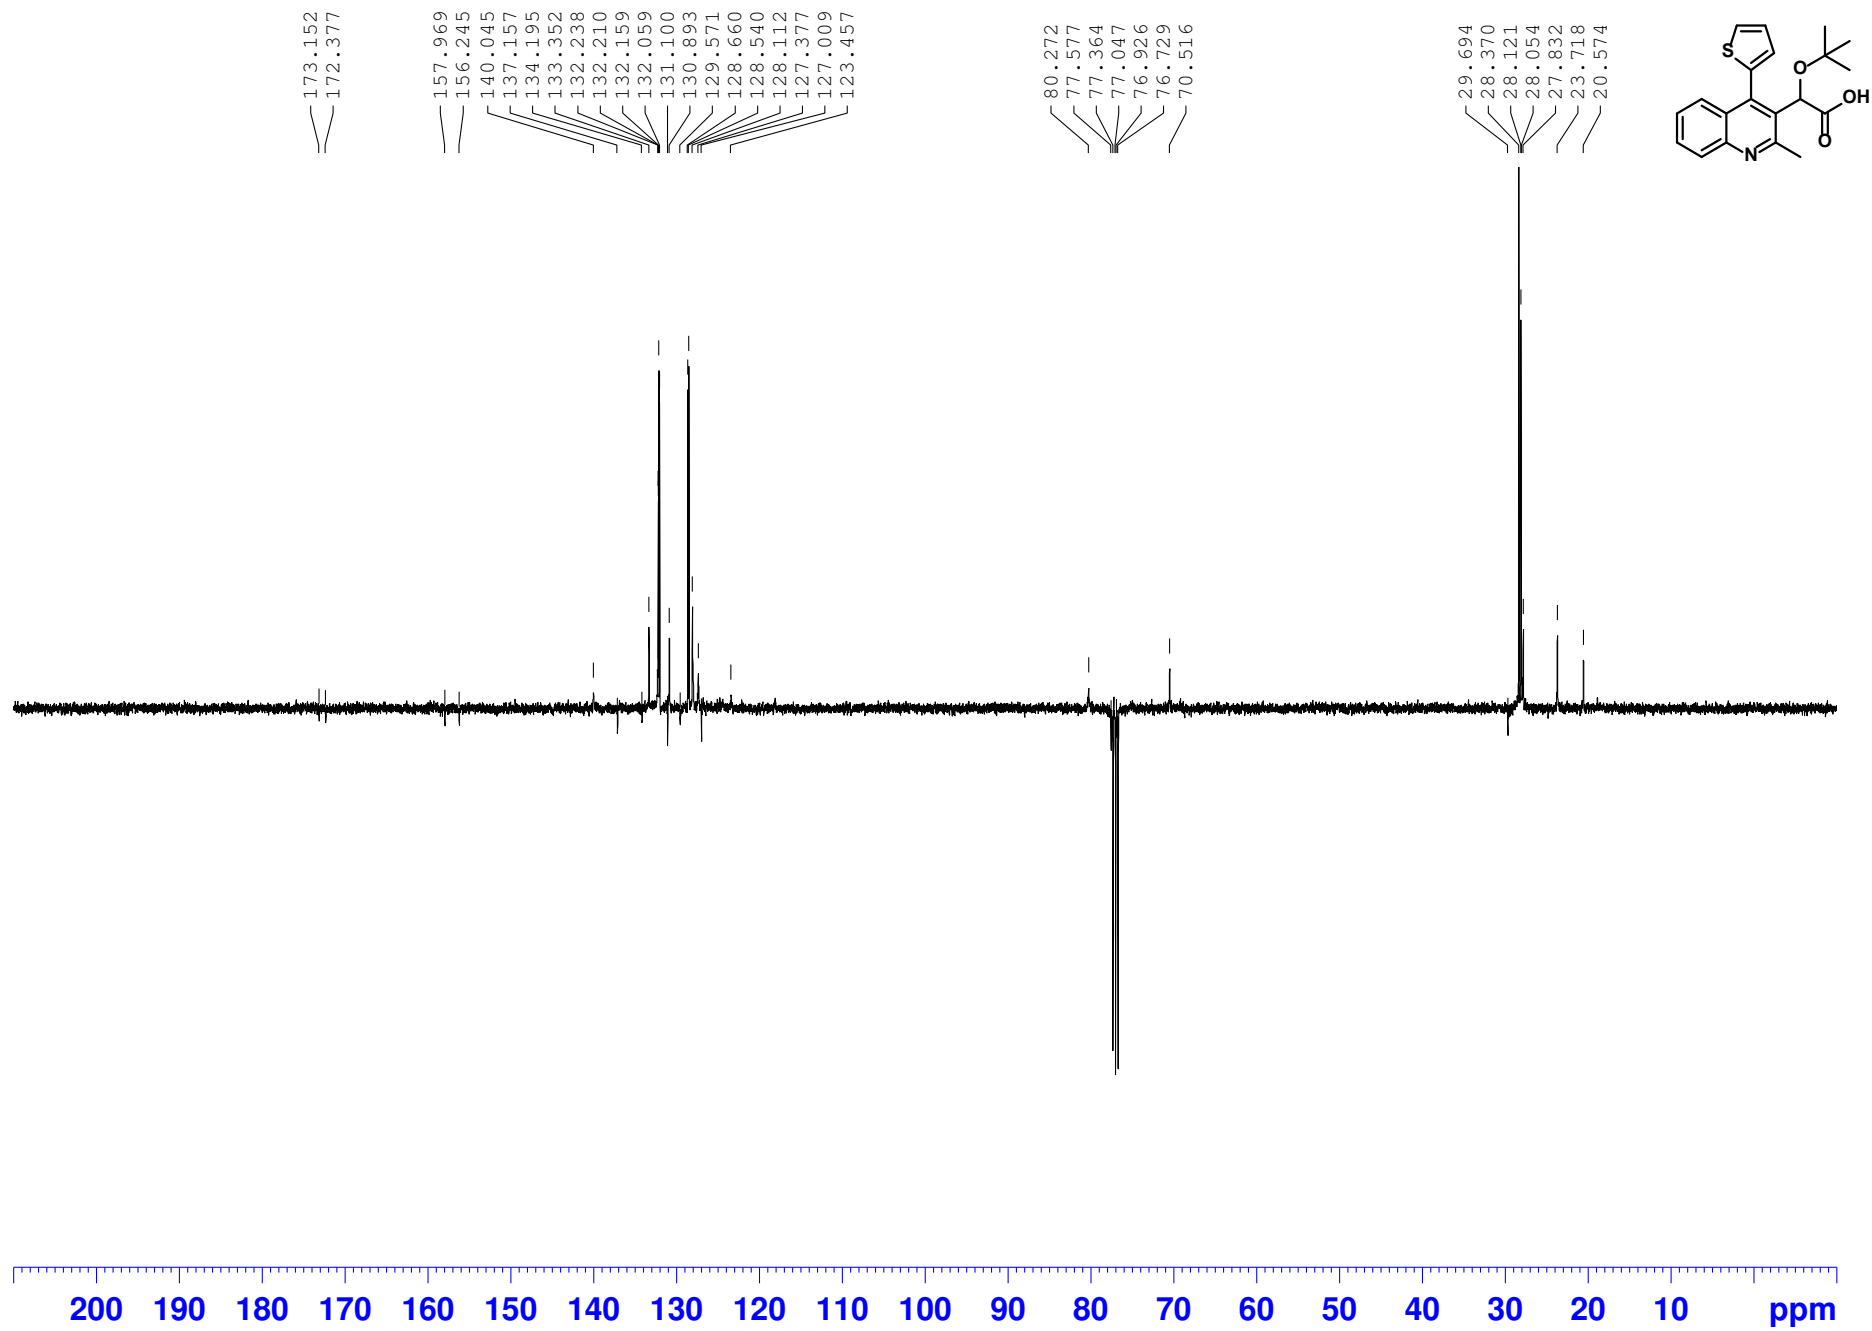

# Mass Spectrum List Report

## Analysis Info

Analysis Name F:\MS1-091514 - 080917\Data\apexdata031918\AH-3-55\_pos\_000003.d  
Method  
Sample Name AH-3-55  
Comment AH-3-55 in THF:MeOH C20H21NO3S H+

Acquisition Date 3/19/2018 10:24:26 AM  
Operator FTMS\_USER  
Instrument apex-Qe

Sample Name AH-3-55 in THF:MeOH  
Exact Mass of C20H21NO3S H+ = 356.131491 m/z  
Mass Observed = 356.131781 m/z

Difference < 1.0 ppm

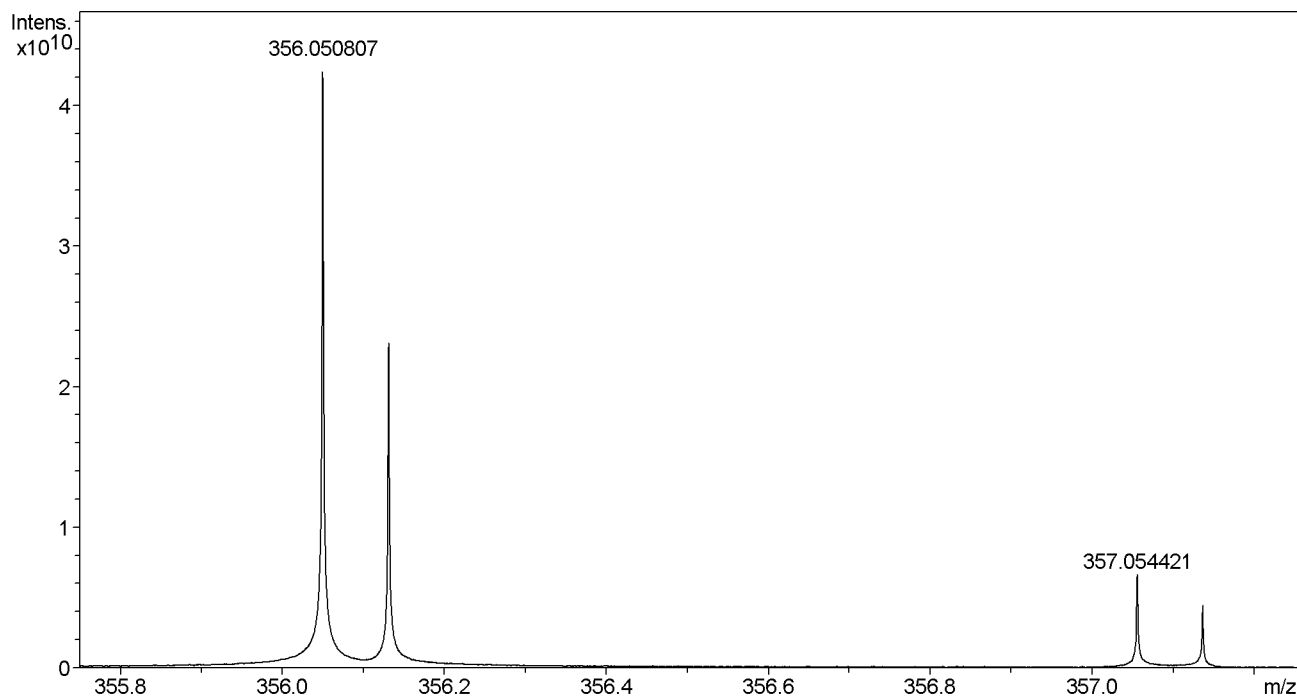

| #  | m/z        | I           |
|----|------------|-------------|
| 1  | 190.982384 | 100791272   |
| 2  | 191.028985 | 118010564   |
| 3  | 200.023558 | 121617396   |
| 4  | 209.441826 | 91227211    |
| 5  | 222.259533 | 149105122   |
| 6  | 224.990068 | 105241373   |
| 7  | 230.154239 | 545323291   |
| 8  | 231.157628 | 134842810   |
| 9  | 237.578652 | 103007233   |
| 10 | 264.115328 | 103691225   |
| 11 | 269.165240 | 552915918   |
| 12 | 270.168589 | 146631266   |
| 13 | 272.201258 | 970610822   |
| 14 | 273.204571 | 122169049   |
| 15 | 274.144034 | 19338379718 |
| 16 | 275.147502 | 3942053969  |
| 17 | 276.150928 | 133119766   |
| 18 | 279.092649 | 376951231   |
| 19 | 279.093746 | 1090015694  |
| 20 | 280.097040 | 177519169   |

---

# Mass Spectrum List Report

---

| #  | m/z        | I           |
|----|------------|-------------|
| 21 | 281.977268 | 89399750    |
| 22 | 286.216969 | 253481730   |
| 23 | 290.139146 | 207253201   |
| 24 | 296.595648 | 166842105   |
| 25 | 298.255695 | 1389347443  |
| 26 | 300.196331 | 128576342   |
| 27 | 301.075540 | 26715696880 |
| 28 | 302.078990 | 6187550558  |
| 29 | 302.175535 | 546942977   |
| 30 | 302.211879 | 212734788   |
| 31 | 303.082416 | 410616365   |
| 32 | 303.178937 | 95245067    |
| 33 | 308.105306 | 501501766   |
| 34 | 310.092920 | 115150235   |
| 35 | 310.102332 | 152475303   |
| 36 | 311.137091 | 105388774   |
| 37 | 312.107338 | 990497510   |
| 38 | 312.108530 | 1330137867  |
| 39 | 312.119662 | 2488929367  |
| 40 | 312.120995 | 5675650173  |
| 41 | 312.141848 | 32055332592 |
| 42 | 313.111887 | 207892986   |
| 43 | 313.123215 | 455082841   |
| 44 | 313.124508 | 559448960   |
| 45 | 313.144040 | 1271465433  |
| 46 | 313.145453 | 3439724032  |
| 47 | 314.136643 | 363437778   |
| 48 | 314.137977 | 651869946   |
| 49 | 314.148950 | 285020245   |
| 50 | 314.248417 | 163638432   |
| 51 | 315.141416 | 96408731    |
| 52 | 316.191282 | 289498031   |
| 53 | 316.226453 | 216877126   |
| 54 | 316.227756 | 201910386   |
| 55 | 322.253435 | 237436161   |
| 56 | 323.041724 | 354407953   |
| 57 | 324.045083 | 105138914   |
| 58 | 324.174956 | 664962917   |
| 59 | 324.176356 | 1397917596  |
| 60 | 324.232745 | 103981187   |
| 61 | 325.179805 | 208844687   |
| 62 | 326.136845 | 294027889   |
| 63 | 326.248430 | 99359903    |
| 64 | 330.206874 | 685254886   |
| 65 | 331.050665 | 155957378   |
| 66 | 331.210186 | 177918903   |
| 67 | 334.103023 | 333358087   |
| 68 | 334.253435 | 915512813   |
| 69 | 335.256731 | 182975103   |
| 70 | 336.173010 | 203773929   |
| 71 | 336.196360 | 166804460   |
| 72 | 336.269127 | 554661996   |
| 73 | 337.272403 | 137258049   |
| 74 | 338.248383 | 704678577   |
| 75 | 339.251801 | 166835395   |
| 76 | 340.152463 | 661539905   |
| 77 | 341.155810 | 145613715   |
| 78 | 342.035531 | 136291527   |
| 79 | 343.144690 | 220785041   |
| 80 | 346.165482 | 98969120    |
| 81 | 346.201889 | 129616816   |
| 82 | 356.050807 | 43103255635 |
| 83 | 356.131781 | 23206004002 |
| 84 | 357.054421 | 6663169716  |

---

# Mass Spectrum List Report

---

| #   | m/z        | I           |
|-----|------------|-------------|
| 85  | 357.135328 | 4429836033  |
| 86  | 358.057871 | 291506913   |
| 87  | 358.127885 | 566415778   |
| 88  | 358.138963 | 204169912   |
| 89  | 358.274698 | 174055353   |
| 90  | 364.173625 | 195066126   |
| 91  | 365.960428 | 177441354   |
| 92  | 368.164382 | 730802432   |
| 93  | 368.166231 | 2649336072  |
| 94  | 368.425688 | 102858128   |
| 95  | 369.169610 | 465401631   |
| 96  | 370.126786 | 103349196   |
| 97  | 370.238234 | 141425606   |
| 98  | 374.173243 | 219310973   |
| 99  | 378.206936 | 109627934   |
| 100 | 378.316147 | 888760605   |
| 101 | 379.319562 | 234074416   |
| 102 | 380.186263 | 238329333   |
| 103 | 380.222662 | 211786314   |
| 104 | 380.295401 | 827863806   |
| 105 | 381.298755 | 224627072   |
| 106 | 382.150562 | 1289578860  |
| 107 | 383.153841 | 244584671   |
| 108 | 383.958472 | 390138534   |
| 109 | 384.148130 | 139452893   |
| 110 | 384.163476 | 160284635   |
| 111 | 384.254010 | 130495456   |
| 112 | 385.228212 | 150999002   |
| 113 | 386.269613 | 115186579   |
| 114 | 388.249032 | 119985912   |
| 115 | 389.115855 | 220042308   |
| 116 | 390.168142 | 288712320   |
| 117 | 390.316157 | 1307987351  |
| 118 | 391.319588 | 326689319   |
| 119 | 392.331908 | 122933401   |
| 120 | 392.942795 | 98818935    |
| 121 | 393.215564 | 210526772   |
| 122 | 398.098217 | 199113085   |
| 123 | 398.145583 | 475050062   |
| 124 | 398.215455 | 273531576   |
| 125 | 398.233317 | 98160435    |
| 126 | 398.269657 | 239360041   |
| 127 | 399.149202 | 130165749   |
| 128 | 399.207442 | 121270409   |
| 129 | 400.040805 | 43318525001 |
| 130 | 400.161741 | 444335201   |
| 131 | 400.284986 | 315960307   |
| 132 | 400.306742 | 131830959   |
| 133 | 401.044389 | 5589661041  |
| 134 | 401.164645 | 116237709   |
| 135 | 401.223035 | 633098743   |
| 136 | 402.047890 | 311438824   |
| 137 | 402.226470 | 188475987   |
| 138 | 406.310991 | 101086833   |
| 139 | 407.849418 | 124395688   |
| 140 | 408.166318 | 165376759   |
| 141 | 408.253969 | 112867831   |
| 142 | 411.825159 | 644938793   |
| 143 | 412.114021 | 143267573   |
| 144 | 412.150434 | 1138491459  |
| 145 | 412.194745 | 489994270   |
| 146 | 412.285340 | 105162630   |
| 147 | 413.198086 | 115110387   |
| 148 | 416.184076 | 155577443   |

---

# Mass Spectrum List Report

---

| #   | m/z        | I          |
|-----|------------|------------|
| 149 | 416.280232 | 157113458  |
| 150 | 418.163169 | 508951890  |
| 151 | 418.257025 | 167665327  |
| 152 | 419.166610 | 116896754  |
| 153 | 420.236305 | 352847690  |
| 154 | 422.023158 | 200643212  |
| 155 | 424.246550 | 1270825588 |
| 156 | 425.249957 | 306762872  |
| 157 | 425.288077 | 114839675  |
| 158 | 426.183282 | 141571542  |
| 159 | 426.225753 | 179249583  |
| 160 | 426.264586 | 97689075   |
| 161 | 426.646947 | 94357922   |
| 162 | 428.072488 | 1403342346 |
| 163 | 428.108814 | 127097641  |
| 164 | 428.205068 | 186393480  |
| 165 | 429.075803 | 256352925  |
| 166 | 430.199701 | 172644811  |
| 167 | 434.158161 | 592582190  |
| 168 | 434.378943 | 142713106  |
| 169 | 435.161693 | 126497320  |
| 170 | 435.184207 | 156877261  |
| 171 | 435.345206 | 176701281  |
| 172 | 436.267775 | 99603819   |
| 173 | 436.285421 | 98661707   |
| 174 | 438.225843 | 290157985  |
| 175 | 438.262327 | 211555814  |
| 176 | 440.243944 | 517509684  |
| 177 | 440.316672 | 556569533  |
| 178 | 441.247261 | 168647262  |
| 179 | 441.320060 | 192793692  |
| 180 | 442.088223 | 158720869  |
| 181 | 442.124596 | 416138387  |
| 182 | 442.220800 | 1163642810 |
| 183 | 443.127871 | 93218837   |
| 184 | 443.197343 | 447261378  |
| 185 | 443.224140 | 199257037  |
| 186 | 443.270061 | 185626005  |
| 187 | 445.213293 | 93416326   |
| 188 | 446.378971 | 285155372  |
| 189 | 447.257043 | 93690370   |
| 190 | 447.382331 | 99023205   |
| 191 | 452.277885 | 867567786  |
| 192 | 453.281222 | 238581458  |
| 193 | 456.103835 | 3389570831 |
| 194 | 456.236443 | 2085866067 |
| 195 | 457.107191 | 606967058  |
| 196 | 457.239824 | 427925641  |
| 197 | 457.285772 | 386606213  |
| 198 | 458.254584 | 667482378  |
| 199 | 458.289353 | 140569623  |
| 200 | 458.327330 | 247340910  |
| 201 | 459.257892 | 170090889  |
| 202 | 459.301354 | 384865626  |
| 203 | 460.304840 | 103480973  |
| 204 | 462.189548 | 224884409  |
| 205 | 466.293616 | 137551680  |
| 206 | 468.348107 | 327756709  |
| 207 | 469.351445 | 95337665   |
| 208 | 470.203143 | 213139386  |
| 209 | 470.215800 | 310706356  |
| 210 | 472.231328 | 5368846075 |
| 211 | 473.234759 | 1014357245 |
| 212 | 474.238275 | 112619350  |

---

# Mass Spectrum List Report

---

| #   | m/z        | I          |
|-----|------------|------------|
| 213 | 476.265113 | 992549134  |
| 214 | 476.278155 | 438507974  |
| 215 | 477.268578 | 239038098  |
| 216 | 477.281631 | 139468603  |
| 217 | 479.133744 | 807675105  |
| 218 | 480.137111 | 226700204  |
| 219 | 480.309299 | 882201028  |
| 220 | 481.131741 | 825486450  |
| 221 | 481.312681 | 267022791  |
| 222 | 482.135073 | 233801596  |
| 223 | 483.190047 | 152186122  |
| 224 | 483.210927 | 104840550  |
| 225 | 484.231516 | 114694949  |
| 226 | 484.267994 | 115579779  |
| 227 | 486.358895 | 133018311  |
| 228 | 488.213793 | 124662884  |
| 229 | 489.257913 | 240358544  |
| 230 | 493.185990 | 117575380  |
| 231 | 493.226198 | 319040893  |
| 232 | 494.251644 | 164620698  |
| 233 | 494.288536 | 1894484035 |
| 234 | 494.325017 | 1907197674 |
| 235 | 494.364568 | 125822329  |
| 236 | 495.291948 | 531079702  |
| 237 | 495.328448 | 536289443  |
| 238 | 496.231624 | 122256383  |
| 239 | 496.331799 | 97699794   |
| 240 | 496.379503 | 101864913  |
| 241 | 498.247376 | 101962767  |
| 242 | 498.283453 | 457777773  |
| 243 | 498.395025 | 105327958  |
| 244 | 499.172296 | 654424436  |
| 245 | 499.286769 | 116786207  |
| 246 | 500.175758 | 206760478  |
| 247 | 501.275744 | 678745405  |
| 248 | 502.279013 | 227632262  |
| 249 | 503.291382 | 259322687  |
| 250 | 504.309386 | 570687990  |
| 251 | 505.312685 | 158536185  |
| 252 | 508.162150 | 98050073   |
| 253 | 508.340730 | 428968039  |
| 254 | 509.344124 | 161144419  |
| 255 | 512.299348 | 207729092  |
| 256 | 515.150052 | 97449187   |
| 257 | 516.332996 | 228445945  |
| 258 | 520.304438 | 110725574  |
| 259 | 522.319942 | 995726059  |
| 260 | 522.356807 | 115491744  |
| 261 | 523.324353 | 462129587  |
| 262 | 524.328269 | 126502858  |
| 263 | 527.120059 | 538051758  |
| 264 | 527.146943 | 174827054  |
| 265 | 528.123269 | 175391093  |
| 266 | 529.145154 | 149817488  |
| 267 | 529.182816 | 119896926  |
| 268 | 530.642575 | 401670742  |
| 269 | 531.122292 | 308833778  |
| 270 | 531.144183 | 206196733  |
| 271 | 532.125584 | 98717844   |
| 272 | 532.327786 | 520070581  |
| 273 | 532.340899 | 327509786  |
| 274 | 535.236857 | 280274420  |
| 275 | 536.372046 | 1947625768 |
| 276 | 537.175466 | 108004780  |



# Mass Spectrum List Report

| #   | m/z        | I           |
|-----|------------|-------------|
| 277 | 537.190649 | 420046894   |
| 278 | 537.375420 | 614368747   |
| 279 | 538.193862 | 159026912   |
| 280 | 539.173794 | 109198681   |
| 281 | 539.272207 | 130641795   |
| 282 | 540.294322 | 99418717    |
| 283 | 543.322645 | 108778309   |
| 284 | 548.335741 | 151225806   |
| 285 | 550.387817 | 171028255   |
| 286 | 554.309696 | 13353936129 |
| 287 | 555.313238 | 3494250650  |
| 288 | 556.316446 | 395931143   |
| 289 | 557.250910 | 130523285   |
| 290 | 557.490889 | 125507350   |
| 291 | 560.372156 | 143800281   |
| 292 | 563.188737 | 612748606   |
| 293 | 564.191986 | 272370986   |
| 294 | 564.403486 | 897542538   |
| 295 | 565.406832 | 286573929   |
| 296 | 568.325739 | 190957112   |
| 297 | 569.121664 | 113223853   |
| 298 | 569.166999 | 266609799   |
| 299 | 569.250876 | 139328115   |
| 300 | 571.136878 | 738982721   |
| 301 | 571.354237 | 152064299   |
| 302 | 572.140256 | 215167135   |
| 303 | 573.135035 | 506027007   |
| 304 | 574.138315 | 156205208   |
| 305 | 575.132079 | 204790266   |
| 306 | 576.153966 | 279342976   |
| 307 | 576.655515 | 181589112   |
| 308 | 578.419860 | 131854706   |
| 309 | 579.162295 | 18023850741 |
| 310 | 579.187602 | 1600071483  |
| 311 | 580.165770 | 6287968053  |
| 312 | 580.192130 | 455066449   |
| 313 | 581.169098 | 855465637   |
| 314 | 581.184492 | 721248490   |
| 315 | 582.187718 | 270379709   |
| 316 | 583.182763 | 151471519   |
| 317 | 585.198059 | 268349903   |
| 318 | 585.245747 | 1747596775  |
| 319 | 585.320251 | 182262835   |
| 320 | 586.248787 | 499909460   |
| 321 | 587.243234 | 201088989   |
| 322 | 587.252019 | 129323093   |
| 323 | 590.195091 | 14163250935 |
| 324 | 590.419832 | 257134215   |
| 325 | 591.198336 | 4572972449  |
| 326 | 592.192732 | 1371203909  |
| 327 | 592.201878 | 819783916   |
| 328 | 592.434844 | 210493291   |
| 329 | 593.196133 | 437369096   |
| 330 | 594.377898 | 208865159   |
| 331 | 596.356983 | 135292448   |
| 332 | 601.240711 | 1086567491  |
| 333 | 602.243651 | 409693572   |
| 334 | 603.238287 | 148306744   |
| 335 | 605.030734 | 224387265   |
| 336 | 606.173079 | 365520738   |
| 337 | 606.450474 | 111567052   |
| 338 | 607.028701 | 223890232   |
| 339 | 607.176184 | 149365931   |
| 340 | 607.227676 | 316806935   |

---

# Mass Spectrum List Report

---

| #   | m/z        | I          |
|-----|------------|------------|
| 341 | 608.230697 | 134736221  |
| 342 | 610.559469 | 488354581  |
| 343 | 610.893662 | 415453270  |
| 344 | 611.226609 | 281959650  |
| 345 | 611.559957 | 251529411  |
| 346 | 611.893148 | 114762599  |
| 347 | 612.225358 | 380059139  |
| 348 | 612.727785 | 107258563  |
| 349 | 615.891206 | 211725815  |
| 350 | 616.225482 | 185483253  |
| 351 | 616.557513 | 147948025  |
| 352 | 616.891925 | 131072701  |
| 353 | 617.218238 | 257750499  |
| 354 | 618.221816 | 96105525   |
| 355 | 622.145167 | 421061425  |
| 356 | 623.148175 | 146237389  |
| 357 | 623.222739 | 1914662320 |
| 358 | 624.225720 | 702091865  |
| 359 | 625.220898 | 229194219  |
| 360 | 627.172976 | 139803283  |
| 361 | 627.269105 | 161184222  |
| 362 | 629.188437 | 291761933  |
| 363 | 630.139716 | 272527721  |
| 364 | 630.191561 | 111034372  |
| 365 | 631.142824 | 98551421   |
| 366 | 632.136297 | 114619258  |
| 367 | 639.200443 | 143232585  |
| 368 | 645.217428 | 151704053  |
| 369 | 652.524987 | 150819323  |
| 370 | 652.859581 | 136475250  |
| 371 | 653.163956 | 314414841  |
| 372 | 653.525306 | 109193173  |
| 373 | 654.167290 | 146031700  |
| 374 | 657.279719 | 143854721  |
| 375 | 661.133676 | 221410110  |
| 376 | 661.174737 | 121783051  |
| 377 | 662.252991 | 281932553  |
| 378 | 663.171997 | 100039371  |
| 379 | 663.256072 | 105946074  |
| 380 | 667.233723 | 101427850  |
| 381 | 669.219722 | 736823715  |
| 382 | 670.223230 | 277807724  |
| 383 | 671.295485 | 99398896   |
| 384 | 691.360584 | 230003890  |
| 385 | 692.363718 | 126387681  |
| 386 | 695.147867 | 195711907  |
| 387 | 700.097515 | 163054664  |
| 388 | 703.255202 | 110682845  |
| 389 | 703.589424 | 95521036   |
| 390 | 703.923441 | 113258116  |
| 391 | 705.083550 | 404061242  |
| 392 | 705.376219 | 261602917  |
| 393 | 706.087174 | 152019348  |
| 394 | 707.081677 | 387776808  |
| 395 | 708.084712 | 127998763  |
| 396 | 713.342455 | 360958155  |
| 397 | 714.345638 | 135587020  |
| 398 | 721.371820 | 96817938   |
| 399 | 727.358109 | 786165824  |
| 400 | 728.361555 | 332637970  |
| 401 | 733.124169 | 110125268  |
| 402 | 782.191769 | 178602920  |
| 403 | 783.195040 | 114726241  |
| 404 | 805.771521 | 563351161  |

---

## Mass Spectrum List Report

---

| #   | m/z        | I         |
|-----|------------|-----------|
| 405 | 806.187689 | 150788924 |
| 406 | 868.282562 | 93489251  |
| 407 | 884.259874 | 219215513 |
| 408 | 885.263210 | 125074969 |

NGJ-9-005 (CDC13, 400 MHz) Pure Yellow Oil - saponification of pyrimidine quinoline

NAME NGJ-9-005  
 EXPNO 20  
 PROCNO 1  
 Date\_ 20171128  
 Time\_ 17.09 h  
 INSTRUM spect  
 PROBHD Z108618\_0161 (   
 PULPROG zg30  
 TD 65536  
 SOLVENT CDC13  
 NS 16  
 DS 2  
 SWH 8012.820 Hz  
 FIDRES 0.244532 Hz  
 AQ 4.0894966 sec  
 RG 101  
 DW 62.400 usec  
 DE 6.50 usec  
 TE 298.2 K  
 D1 1.00000000 sec  
 TD0 1  
 SFO1 400.1724710 MHz  
 NUC1 1H  
 P1 9.88 usec  
 SI 65536  
 SF 400.1700033 MHz  
 WDW EM  
 SSB 0  
 LB 0.30 Hz  
 GB 0  
 PC 1.00

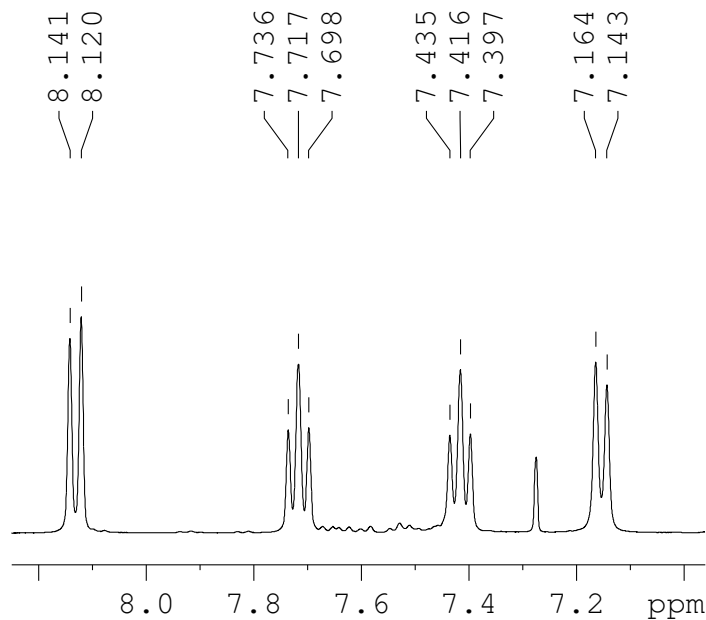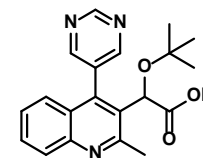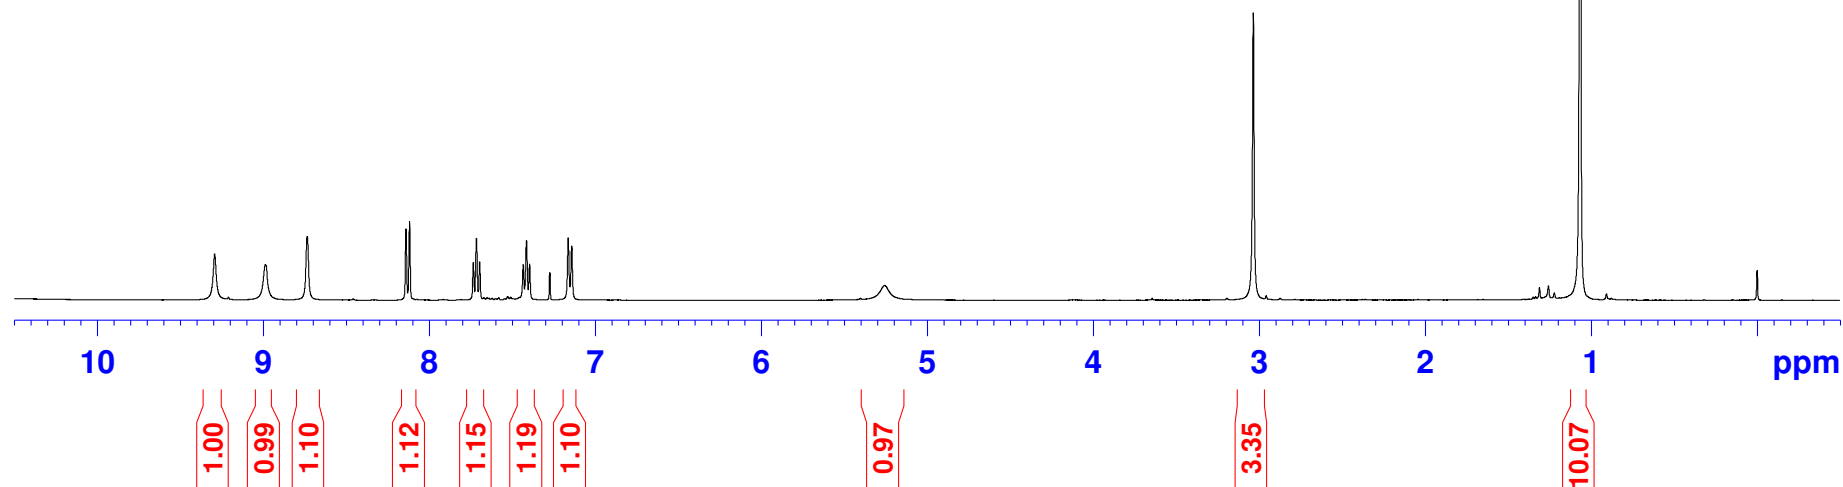

NGJ-9-005 (CDC13, 400 MHz) Pure Yellow Oil - saponification of pyrimidine quinoline

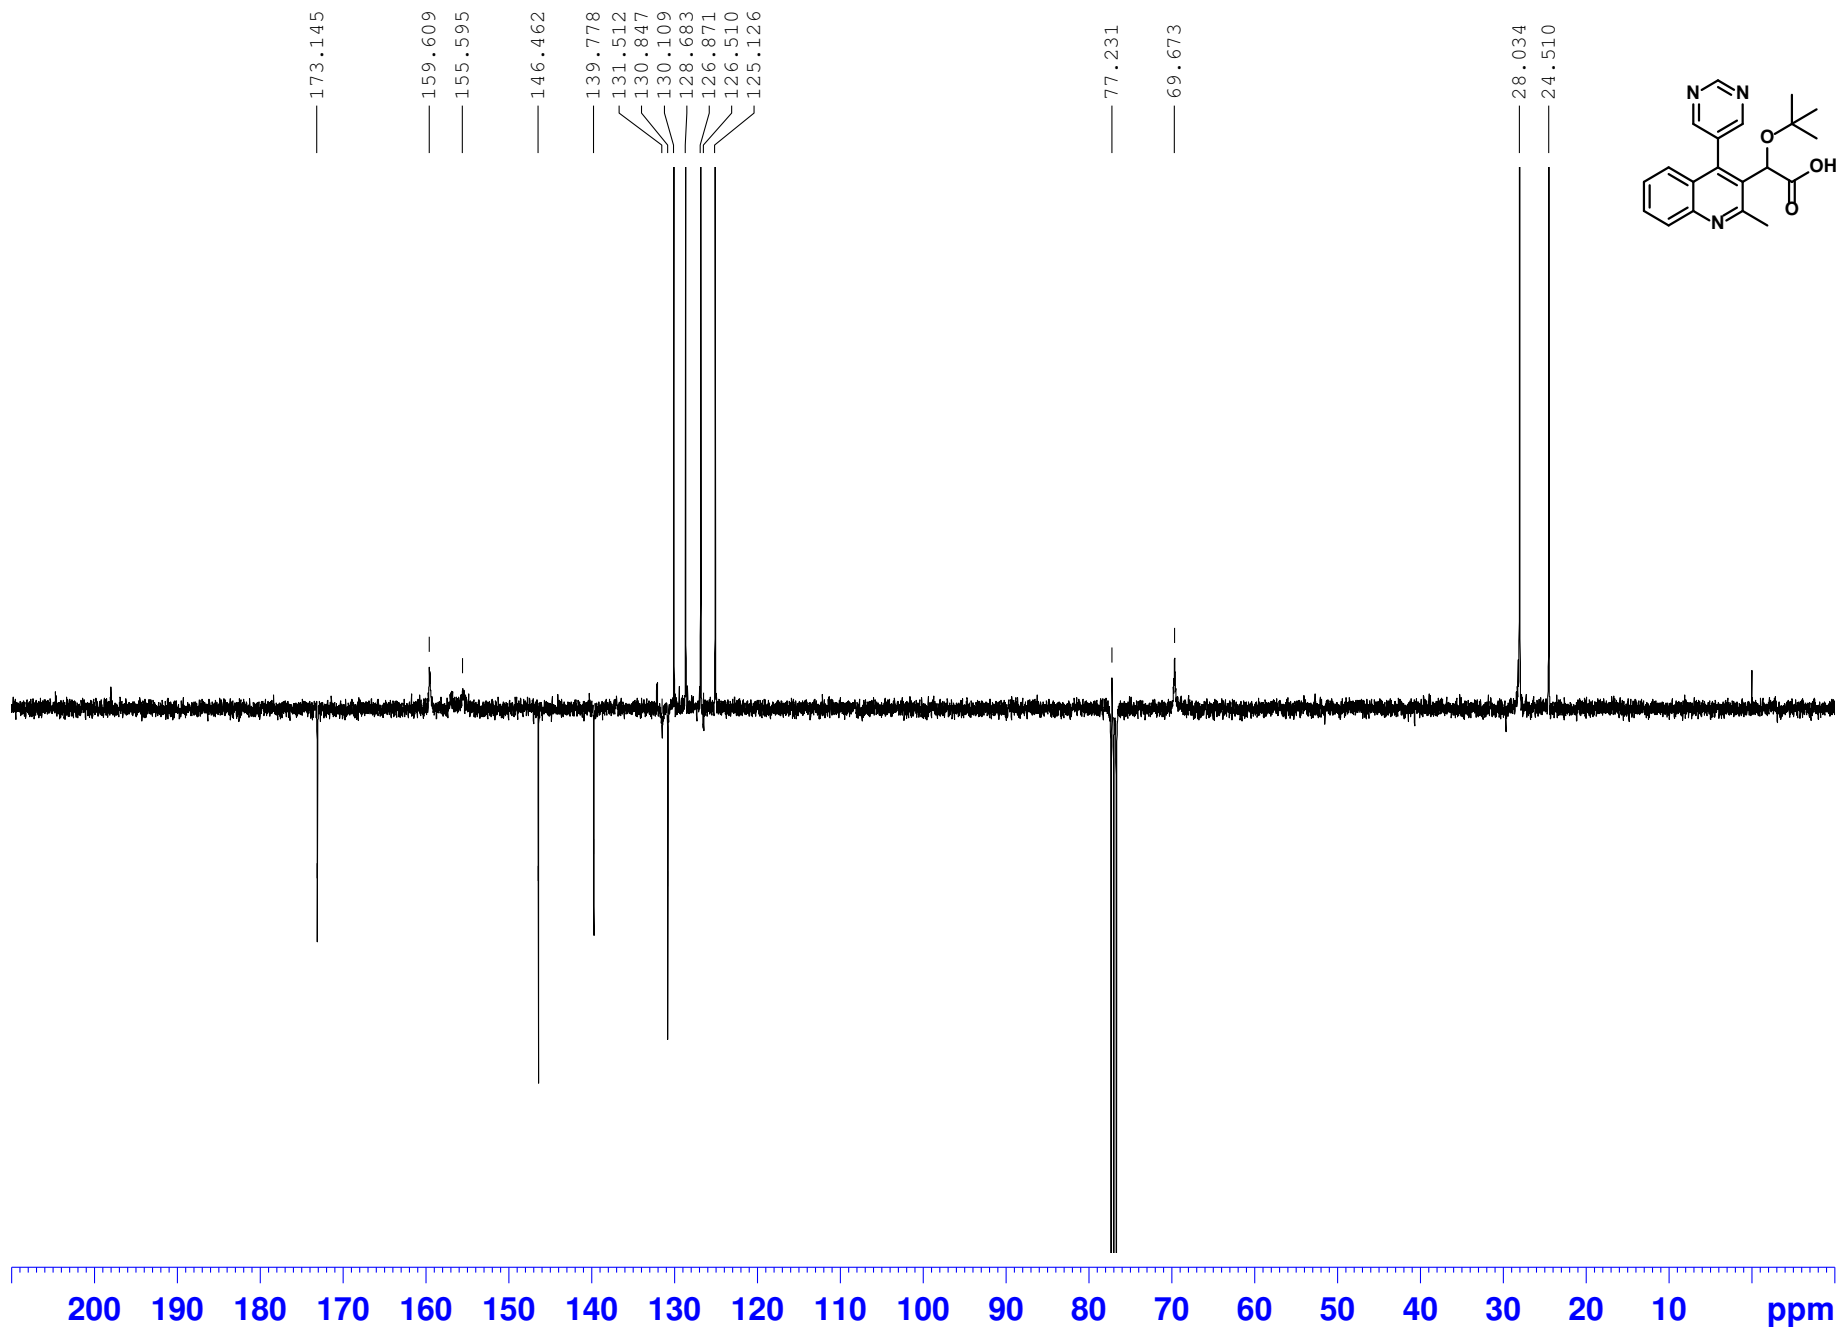

# Mass Spectrum List Report

## Analysis Info

Analysis Name F:\MS1-091514 - 080917\Data\apexdata031918\NGJ-9-005\_pos\_000002.d  
Method  
Sample Name NGJ-9-005  
Comment NGJ-9-005 in THF:MeOH C20H21N3O3 H+

Acquisition Date 3/19/2018 2:46:37 PM  
Operator FTMS\_USER  
Instrument apex-Qe

Sample Name NGJ-9-005 in THF:MeOH  
Exact Mass of C20H21N3O3 H+ = 352.165568 m/z  
Mass Observed = 352.165853 m/z

Difference < 1.0 ppm

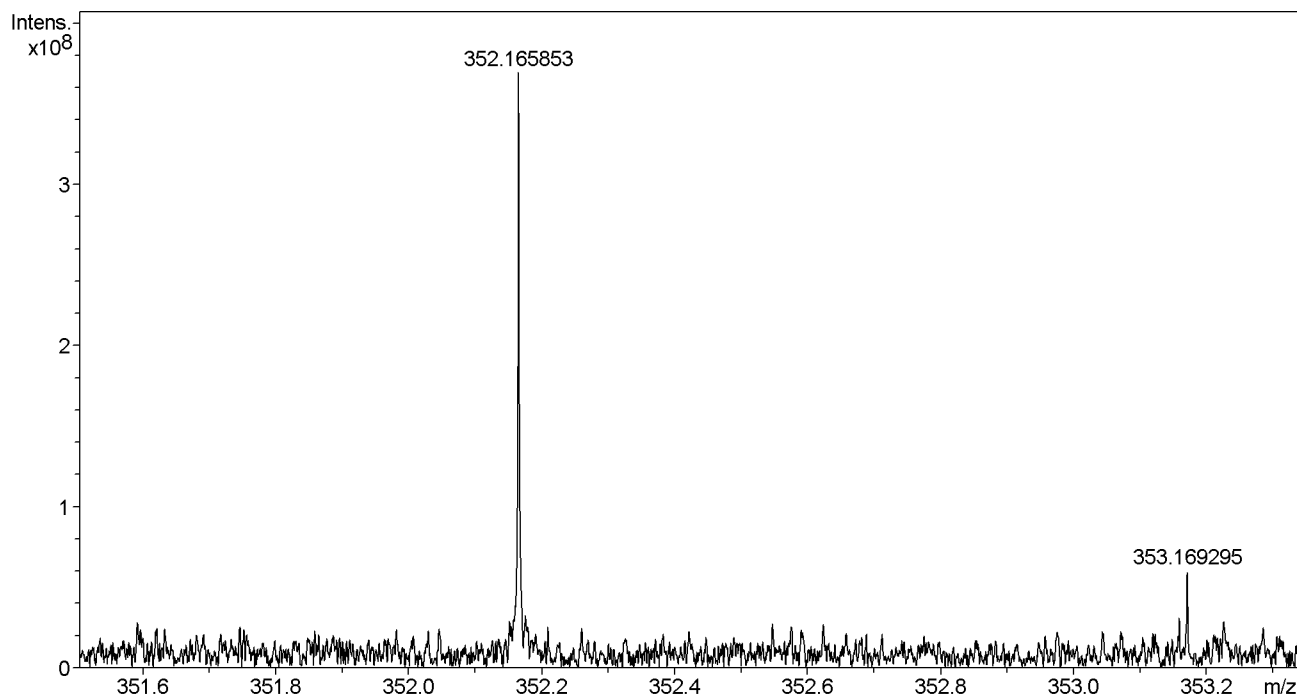

| #  | m/z        | I         |
|----|------------|-----------|
| 1  | 184.390863 | 67087584  |
| 2  | 190.061855 | 122585753 |
| 3  | 202.340528 | 111540498 |
| 4  | 215.089214 | 127729295 |
| 5  | 231.120554 | 93255337  |
| 6  | 245.099778 | 155489750 |
| 7  | 269.136194 | 79859806  |
| 8  | 283.115540 | 54971893  |
| 9  | 285.131084 | 87659990  |
| 10 | 301.126046 | 99162811  |
| 11 | 301.162414 | 103285459 |
| 12 | 303.141754 | 151939195 |
| 13 | 304.097121 | 69602208  |
| 14 | 314.342045 | 60310319  |
| 15 | 317.120971 | 163943113 |
| 16 | 340.394067 | 66492255  |
| 17 | 352.165853 | 369545031 |
| 18 | 353.169295 | 60633698  |
| 19 | 354.409702 | 74856905  |
| 20 | 360.323956 | 394454146 |

---

# Mass Spectrum List Report

---

| #  | m/z        | I          |
|----|------------|------------|
| 21 | 361.327363 | 102415768  |
| 22 | 364.191048 | 601908299  |
| 23 | 365.194430 | 148341724  |
| 24 | 370.404645 | 216014035  |
| 25 | 371.408042 | 54846767   |
| 26 | 374.303289 | 62136669   |
| 27 | 375.199250 | 123830838  |
| 28 | 376.318952 | 101866627  |
| 29 | 378.170348 | 86801343   |
| 30 | 386.172994 | 59256300   |
| 31 | 392.313881 | 79370098   |
| 32 | 393.209804 | 89026406   |
| 33 | 393.297706 | 63301472   |
| 34 | 396.180929 | 185945316  |
| 35 | 398.241788 | 1139341613 |
| 36 | 399.245155 | 215201491  |
| 37 | 400.152146 | 62235753   |
| 38 | 405.188663 | 53179004   |
| 39 | 408.180920 | 967759029  |
| 40 | 408.308892 | 56347667   |
| 41 | 409.184335 | 221548455  |
| 42 | 409.219931 | 53949304   |
| 43 | 410.436010 | 62994706   |
| 44 | 412.451626 | 56790503   |
| 45 | 413.266645 | 88594742   |
| 46 | 425.139710 | 53741156   |
| 47 | 425.287816 | 392711535  |
| 48 | 426.291171 | 80455418   |
| 49 | 426.467405 | 66108890   |
| 50 | 433.157776 | 53062908   |
| 51 | 435.344870 | 487715148  |
| 52 | 436.348226 | 127183970  |
| 53 | 437.236067 | 89296974   |
| 54 | 452.519338 | 88392021   |
| 55 | 468.514316 | 84484640   |
| 56 | 469.517507 | 58220955   |
| 57 | 480.091626 | 55860748   |
| 58 | 480.550782 | 227176706  |
| 59 | 481.262297 | 58406691   |
| 60 | 481.553909 | 67453892   |
| 61 | 491.116757 | 121829877  |
| 62 | 493.113875 | 69468497   |
| 63 | 493.175454 | 150758674  |
| 64 | 494.178881 | 52517549   |
| 65 | 494.566419 | 89696950   |
| 66 | 496.545740 | 126023516  |
| 67 | 497.548983 | 64524183   |
| 68 | 508.582062 | 1154969094 |
| 69 | 509.585464 | 418918274  |
| 70 | 510.588924 | 73189514   |
| 71 | 520.582141 | 85141940   |
| 72 | 522.597750 | 173724685  |
| 73 | 523.143037 | 93671338   |
| 74 | 523.601260 | 78173829   |
| 75 | 524.576995 | 669062636  |
| 76 | 525.140052 | 63897725   |
| 77 | 525.376642 | 72668031   |
| 78 | 525.580407 | 248382685  |
| 79 | 536.613330 | 3982996837 |
| 80 | 537.395430 | 144827258  |
| 81 | 537.616778 | 1385023266 |
| 82 | 538.592967 | 58412419   |
| 83 | 538.620187 | 238548447  |
| 84 | 550.592855 | 138658589  |

---

## Mass Spectrum List Report

---

| #   | m/z        | I          |
|-----|------------|------------|
| 85  | 550.629251 | 142877305  |
| 86  | 551.632271 | 65390563   |
| 87  | 552.608284 | 2073660361 |
| 88  | 553.390342 | 100002381  |
| 89  | 553.611674 | 735704355  |
| 90  | 554.615041 | 109063301  |
| 91  | 564.644699 | 1413089722 |
| 92  | 565.648116 | 509583368  |
| 93  | 566.587883 | 77279227   |
| 94  | 566.651390 | 113583425  |
| 95  | 568.603424 | 68931313   |
| 96  | 569.402843 | 107559567  |
| 97  | 572.234969 | 114697549  |
| 98  | 578.624000 | 64558791   |
| 99  | 578.660330 | 107099371  |
| 100 | 580.639647 | 499978052  |
| 101 | 581.642930 | 204487561  |
| 102 | 592.676007 | 1847766520 |
| 103 | 593.679413 | 747142656  |
| 104 | 594.682694 | 145174211  |
| 105 | 599.548926 | 430502774  |
| 106 | 600.552204 | 154396761  |
| 107 | 606.655277 | 82821742   |
| 108 | 608.671047 | 529991582  |
| 109 | 609.674280 | 229172126  |
| 110 | 610.677766 | 52805751   |
| 111 | 613.429095 | 156730459  |
| 112 | 614.432682 | 52517985   |
| 113 | 620.707510 | 145625281  |
| 114 | 621.710913 | 63367009   |
| 115 | 642.630407 | 57961890   |
| 116 | 648.738848 | 81113449   |
| 117 | 655.439650 | 80696225   |
| 118 | 657.455470 | 277961339  |
| 119 | 658.458799 | 93361917   |
| 120 | 685.436297 | 211850411  |
| 121 | 686.439605 | 103433439  |
| 122 | 699.466319 | 67497285   |
| 123 | 700.469196 | 53375762   |
| 124 | 701.481739 | 190982106  |
| 125 | 702.484923 | 70531976   |
| 126 | 745.507782 | 88578639   |
| 127 | 861.540920 | 71021492   |
| 128 | 877.536500 | 110838930  |
| 129 | 878.540620 | 75853257   |



NGJ-9-002 (CDC13, 400 MHz) Pure Red/Brown Oil - saponification of benzodioxane

```

NAME      NGJ-9-002
EXPNO     50
PROCNO    1
Date_     20180208
Time      18.07 h
INSTRUM   spect
PROBHD    Z108618_0161 (
PULPROG   zg30
TD        65536
SOLVENT   CDC13
NS        16
DS        2
SWH       8012.820 Hz
FIDRES    0.244532 Hz
AQ        4.0894966 sec
RG        80.6
DW        62.400 usec
DE        6.50 usec
TE        298.2 K
D1        1.00000000 sec
TD0       1
SF01      400.1724710 MHz
NUC1      1H
P1        9.88 usec
SI        65536
SF        400.1700057 MHz
WDW       EM
SSB       0
LB        0.30 Hz
GB        0
PC        1.00
    
```

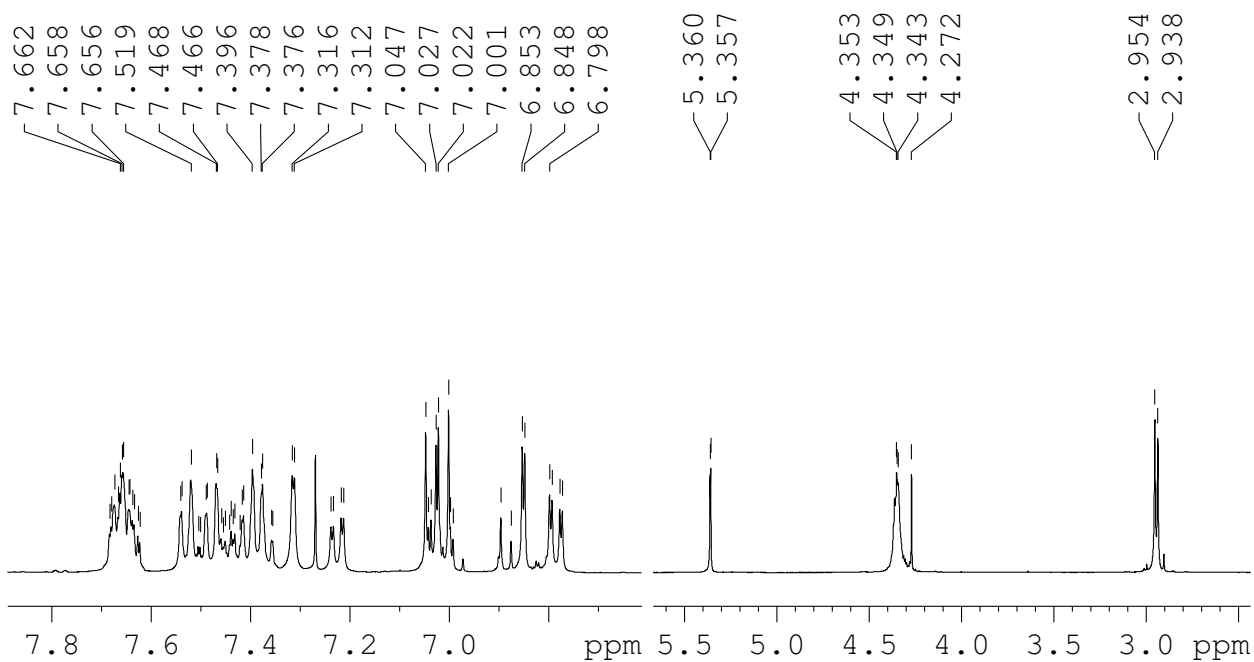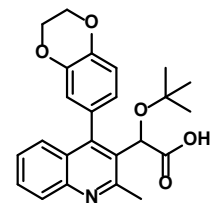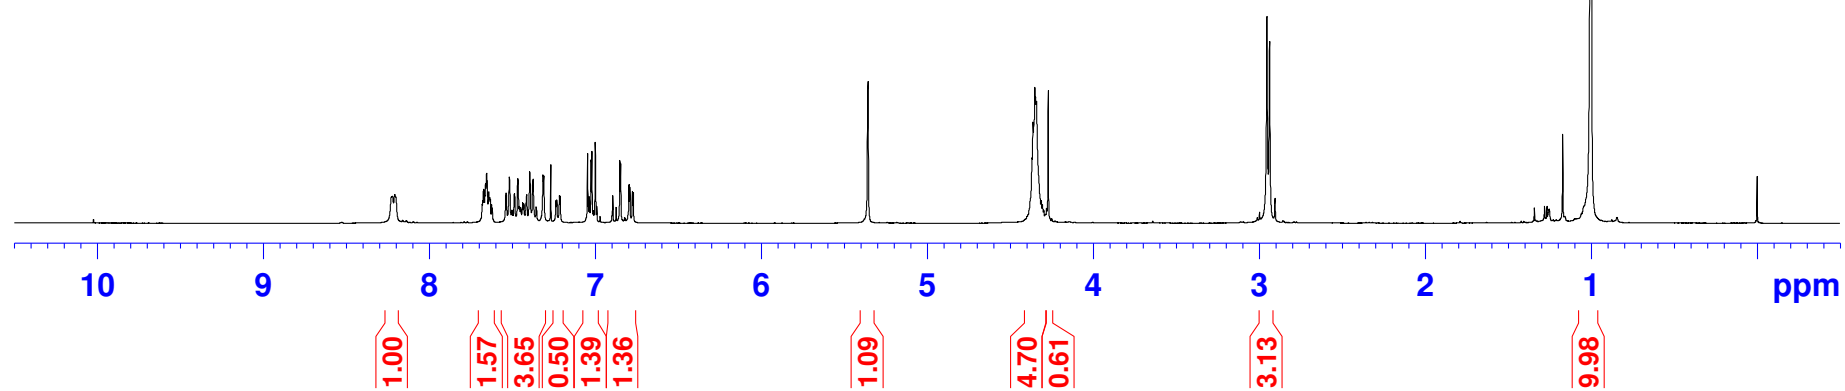

NGJ-9-002 (CDC13, 400 MHz) Pure Red/Brown Oil - saponification of benzodioxane

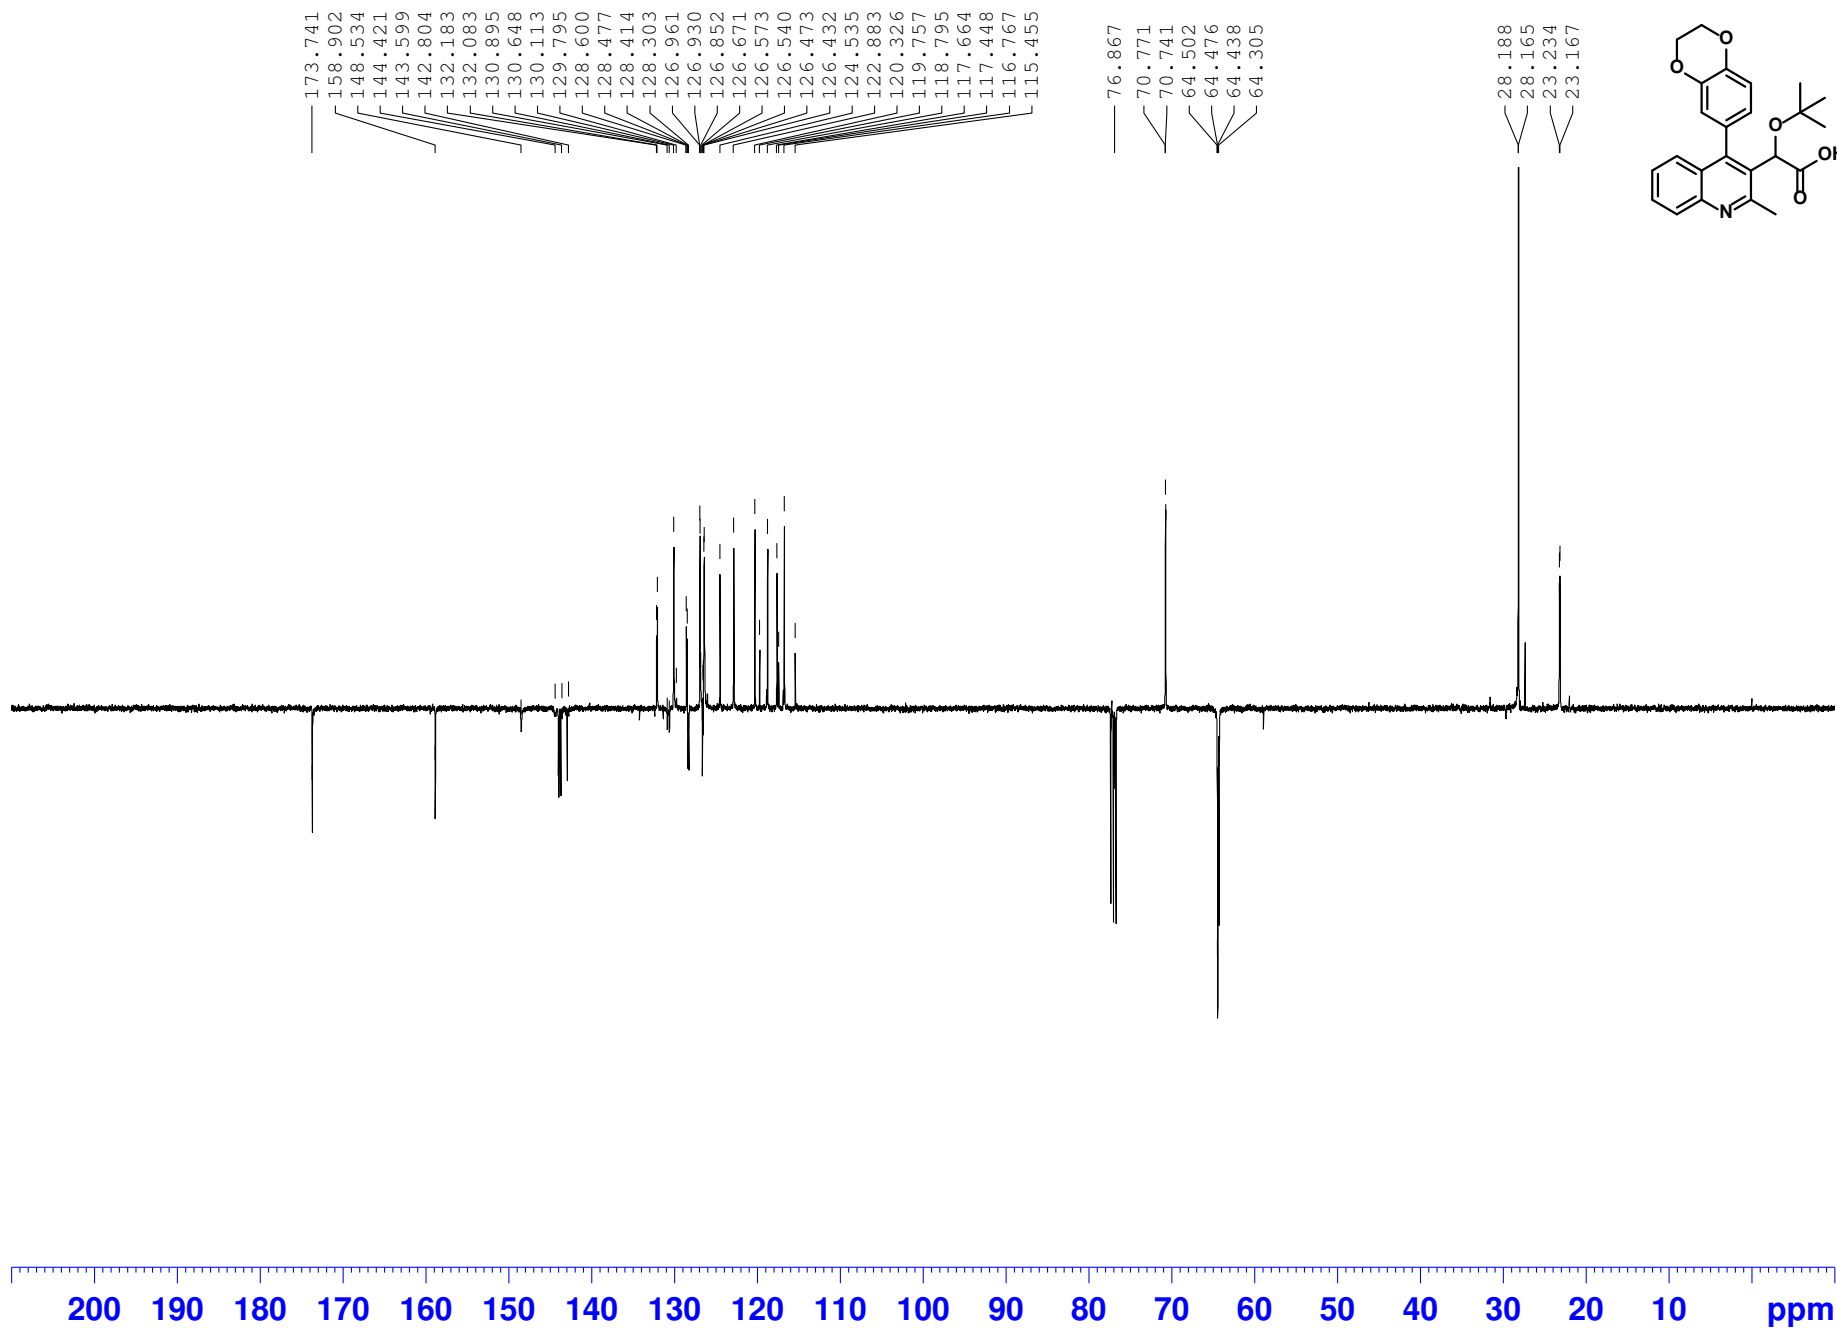

# Mass Spectrum List Report

## Analysis Info

Analysis Name F:\MS1-091514 - 080917\Data\apexdata031918\NGJ-9-002\_pos\_000003.d  
Method  
Sample Name NGJ-9-002  
Comment NGJ-9-002 in THF:MeOH C24H25NO5 H+

Acquisition Date 3/19/2018 2:31:18 PM  
Operator FTMS\_USER  
Instrument apex-Qe

Sample Name NGJ-9-002 in THF:MeOH  
Exact Mass of C24H25NO5 H+ = 408.180549 m/z  
Mass Observed = 408.180636 m/z

Difference < 1.0 ppm

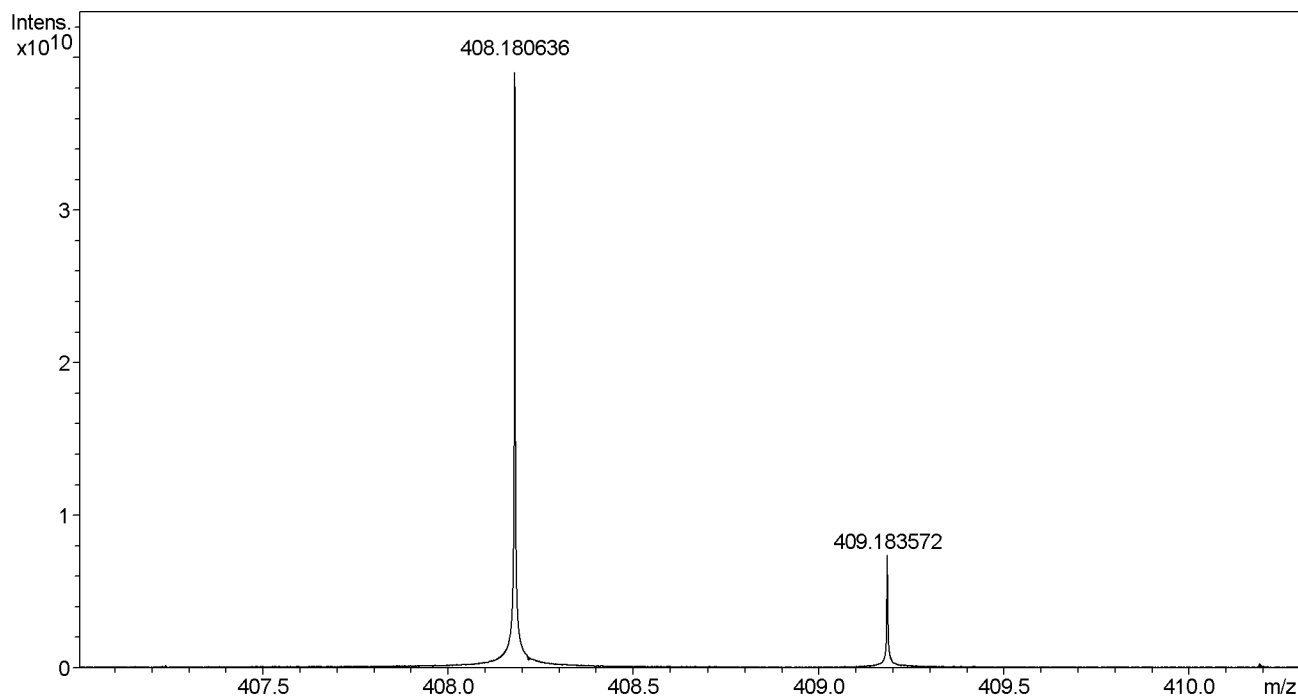

| #  | m/z        | I          |
|----|------------|------------|
| 1  | 186.031046 | 431823987  |
| 2  | 186.554638 | 1560984987 |
| 3  | 186.557349 | 174630460  |
| 4  | 198.093353 | 282319933  |
| 5  | 204.093554 | 167354969  |
| 6  | 209.441469 | 98643343   |
| 7  | 227.793384 | 258517694  |
| 8  | 251.592600 | 240919932  |
| 9  | 251.593399 | 178228601  |
| 10 | 285.520706 | 355783736  |
| 11 | 289.109995 | 100862974  |
| 12 | 290.117864 | 154048873  |
| 13 | 293.109512 | 188282766  |
| 14 | 294.112968 | 168555969  |
| 15 | 301.075763 | 2984045873 |
| 16 | 302.079189 | 394280523  |
| 17 | 303.131719 | 152713886  |
| 18 | 304.097339 | 176703571  |
| 19 | 304.900352 | 1960503372 |
| 20 | 304.901583 | 446712117  |

---

# Mass Spectrum List Report

---

| #  | m/z        | I            |
|----|------------|--------------|
| 21 | 306.113068 | 267996819    |
| 22 | 308.475828 | 174068456    |
| 23 | 336.981422 | 193057935    |
| 24 | 338.139381 | 163777228    |
| 25 | 339.130423 | 210976504    |
| 26 | 347.584107 | 1062231701   |
| 27 | 352.567557 | 225634449    |
| 28 | 359.081428 | 273667731    |
| 29 | 363.193235 | 805248396    |
| 30 | 364.190861 | 828503970120 |
| 31 | 365.194247 | 152982509087 |
| 32 | 366.198004 | 9210665141   |
| 33 | 367.198775 | 318819003    |
| 34 | 367.201891 | 396914683    |
| 35 | 375.972059 | 300841881    |
| 36 | 378.170620 | 5222592751   |
| 37 | 378.207383 | 499076032    |
| 38 | 379.171787 | 262510169    |
| 39 | 379.174201 | 940671770    |
| 40 | 379.181762 | 3242260944   |
| 41 | 380.186538 | 341622416    |
| 42 | 381.363988 | 253483122    |
| 43 | 382.464167 | 23935140382  |
| 44 | 386.173395 | 843710261    |
| 45 | 387.176863 | 229682489    |
| 46 | 394.200048 | 2218677619   |
| 47 | 394.201589 | 7342936280   |
| 48 | 395.204414 | 3299222680   |
| 49 | 396.180589 | 107272862894 |
| 50 | 397.182548 | 1735266749   |
| 51 | 397.184137 | 6689786631   |
| 52 | 398.186591 | 605964121    |
| 53 | 400.151494 | 514886736    |
| 54 | 406.237453 | 801640883    |
| 55 | 408.180636 | 39770927228  |
| 56 | 408.217188 | 712313147    |
| 57 | 408.221373 | 639597966    |
| 58 | 409.183572 | 7446352322   |
| 59 | 410.186220 | 244949004    |
| 60 | 410.188394 | 217093673    |
| 61 | 416.220822 | 135718632    |
| 62 | 416.223114 | 195362133    |
| 63 | 418.163576 | 251995396    |
| 64 | 430.162295 | 5592433234   |
| 65 | 431.166910 | 456353301    |
| 66 | 436.211253 | 10020935516  |
| 67 | 436.212970 | 6027826434   |
| 68 | 436.248181 | 299351220    |
| 69 | 436.256008 | 239453238    |
| 70 | 437.215147 | 4214055375   |
| 71 | 438.219759 | 271660737    |
| 72 | 450.225713 | 172753722    |
| 73 | 450.228625 | 506004289    |
| 74 | 450.262273 | 169591724    |
| 75 | 450.265048 | 477905845    |
| 76 | 451.231964 | 178628689    |
| 77 | 451.268499 | 140368858    |
| 78 | 452.145649 | 151515126    |
| 79 | 452.244315 | 222585051    |
| 80 | 458.195045 | 258700545    |
| 81 | 459.170738 | 181792964    |
| 82 | 464.243811 | 10665443503  |
| 83 | 465.243519 | 246219183    |
| 84 | 465.247516 | 1632761071   |

---

## Mass Spectrum List Report

---

| #   | m/z        | I          |
|-----|------------|------------|
| 85  | 466.251049 | 194781406  |
| 86  | 477.181275 | 112294413  |
| 87  | 486.226423 | 164978972  |
| 88  | 492.275703 | 587294778  |
| 89  | 493.176251 | 605617278  |
| 90  | 493.279092 | 191998828  |
| 91  | 494.179652 | 180018600  |
| 92  | 533.244942 | 98082210   |
| 93  | 549.312481 | 124335330  |
| 94  | 563.189112 | 190115923  |
| 95  | 579.162691 | 1119242044 |
| 96  | 580.166250 | 3325924464 |
| 97  | 581.169683 | 475339683  |
| 98  | 581.258112 | 326429931  |
| 99  | 582.261749 | 115740241  |
| 100 | 583.255264 | 124708829  |
| 101 | 637.168663 | 341085528  |
| 102 | 638.171943 | 116643415  |
| 103 | 642.277851 | 457200313  |
| 104 | 643.281587 | 168439508  |
| 105 | 667.282248 | 1204743469 |
| 106 | 668.285748 | 534247766  |
| 107 | 669.288117 | 105113651  |
| 108 | 669.298185 | 119089246  |
| 109 | 700.284431 | 162486363  |
| 110 | 701.287765 | 299667724  |
| 111 | 702.291180 | 102434736  |
| 112 | 708.250565 | 281970586  |
| 113 | 709.254073 | 121598409  |
| 114 | 741.356057 | 117752908  |
| 115 | 769.350719 | 191238890  |

NGJ-9-092 (CDC13, 400 MHz) Pure Yellow Oil - saponification of 3,4-dimethoxyquinoline

Current Data Parameters  
NAME NGJ-9-092  
EXPNO 30  
PROCNO 1

F2 - Acquisition Parameters  
Date\_ 20180708  
Time\_ 19.35 h  
INSTRUM spect  
PROBHD Z108618\_0161 (   
PULPROG zg30  
TD 65536  
SOLVENT CDC13  
NS 16  
DS 2  
SWH 8012.820 Hz  
FIDRES 0.244532 Hz  
AQ 4.0894465 sec  
RG 128  
DW 62.400 usec  
DE 6.50 usec  
TE 298.2 K  
D1 1.00000000 sec  
TDO 1  
SFO1 400.1724710 MHz  
NUC1 1H  
P1 9.88 usec  
PLW1 28.50000000 W

F2 - Processing parameters  
SI 65536  
SF 400.1700047 MHz  
WDW EM  
SSB 0  
LB 0.30 Hz  
GB 0  
PC 1.00

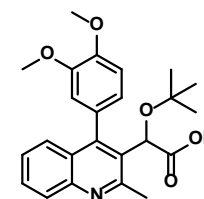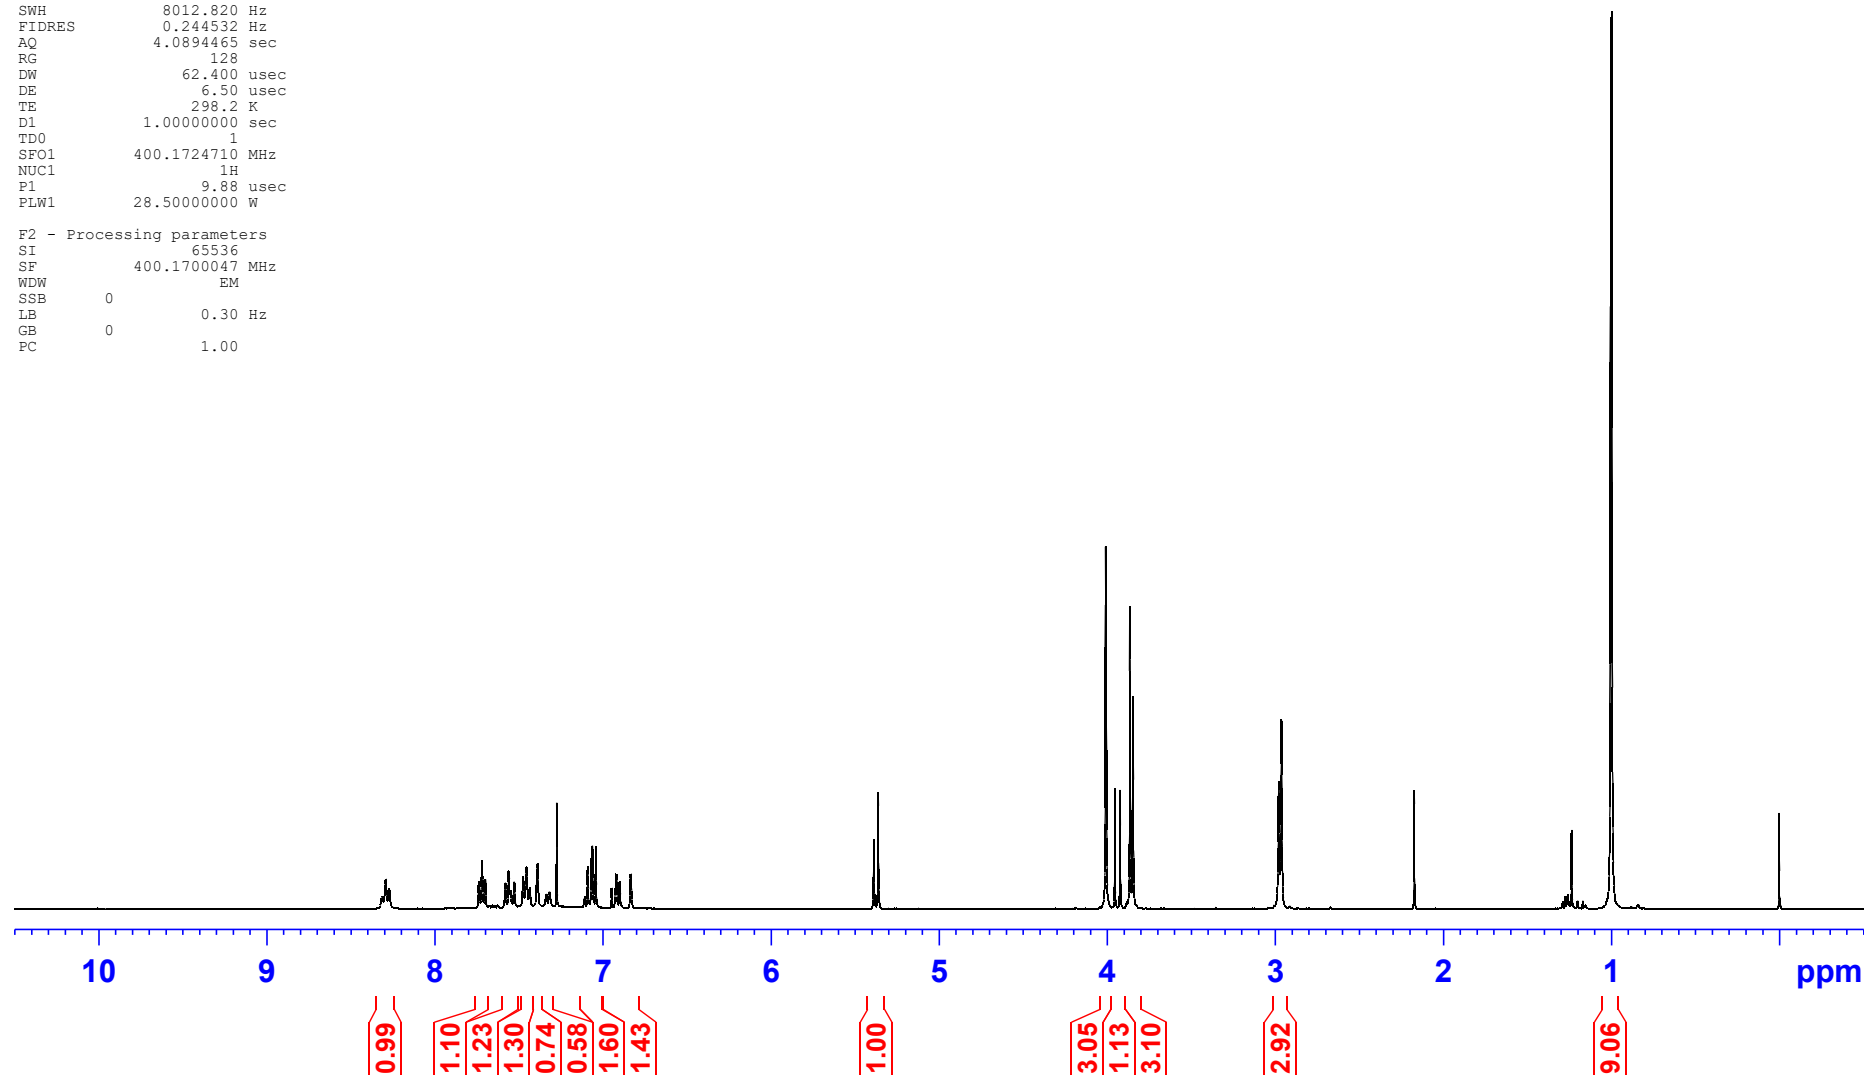

NGJ-9-092 (CDC13, 400 MHz) Pure Yellow Oil- saponification of

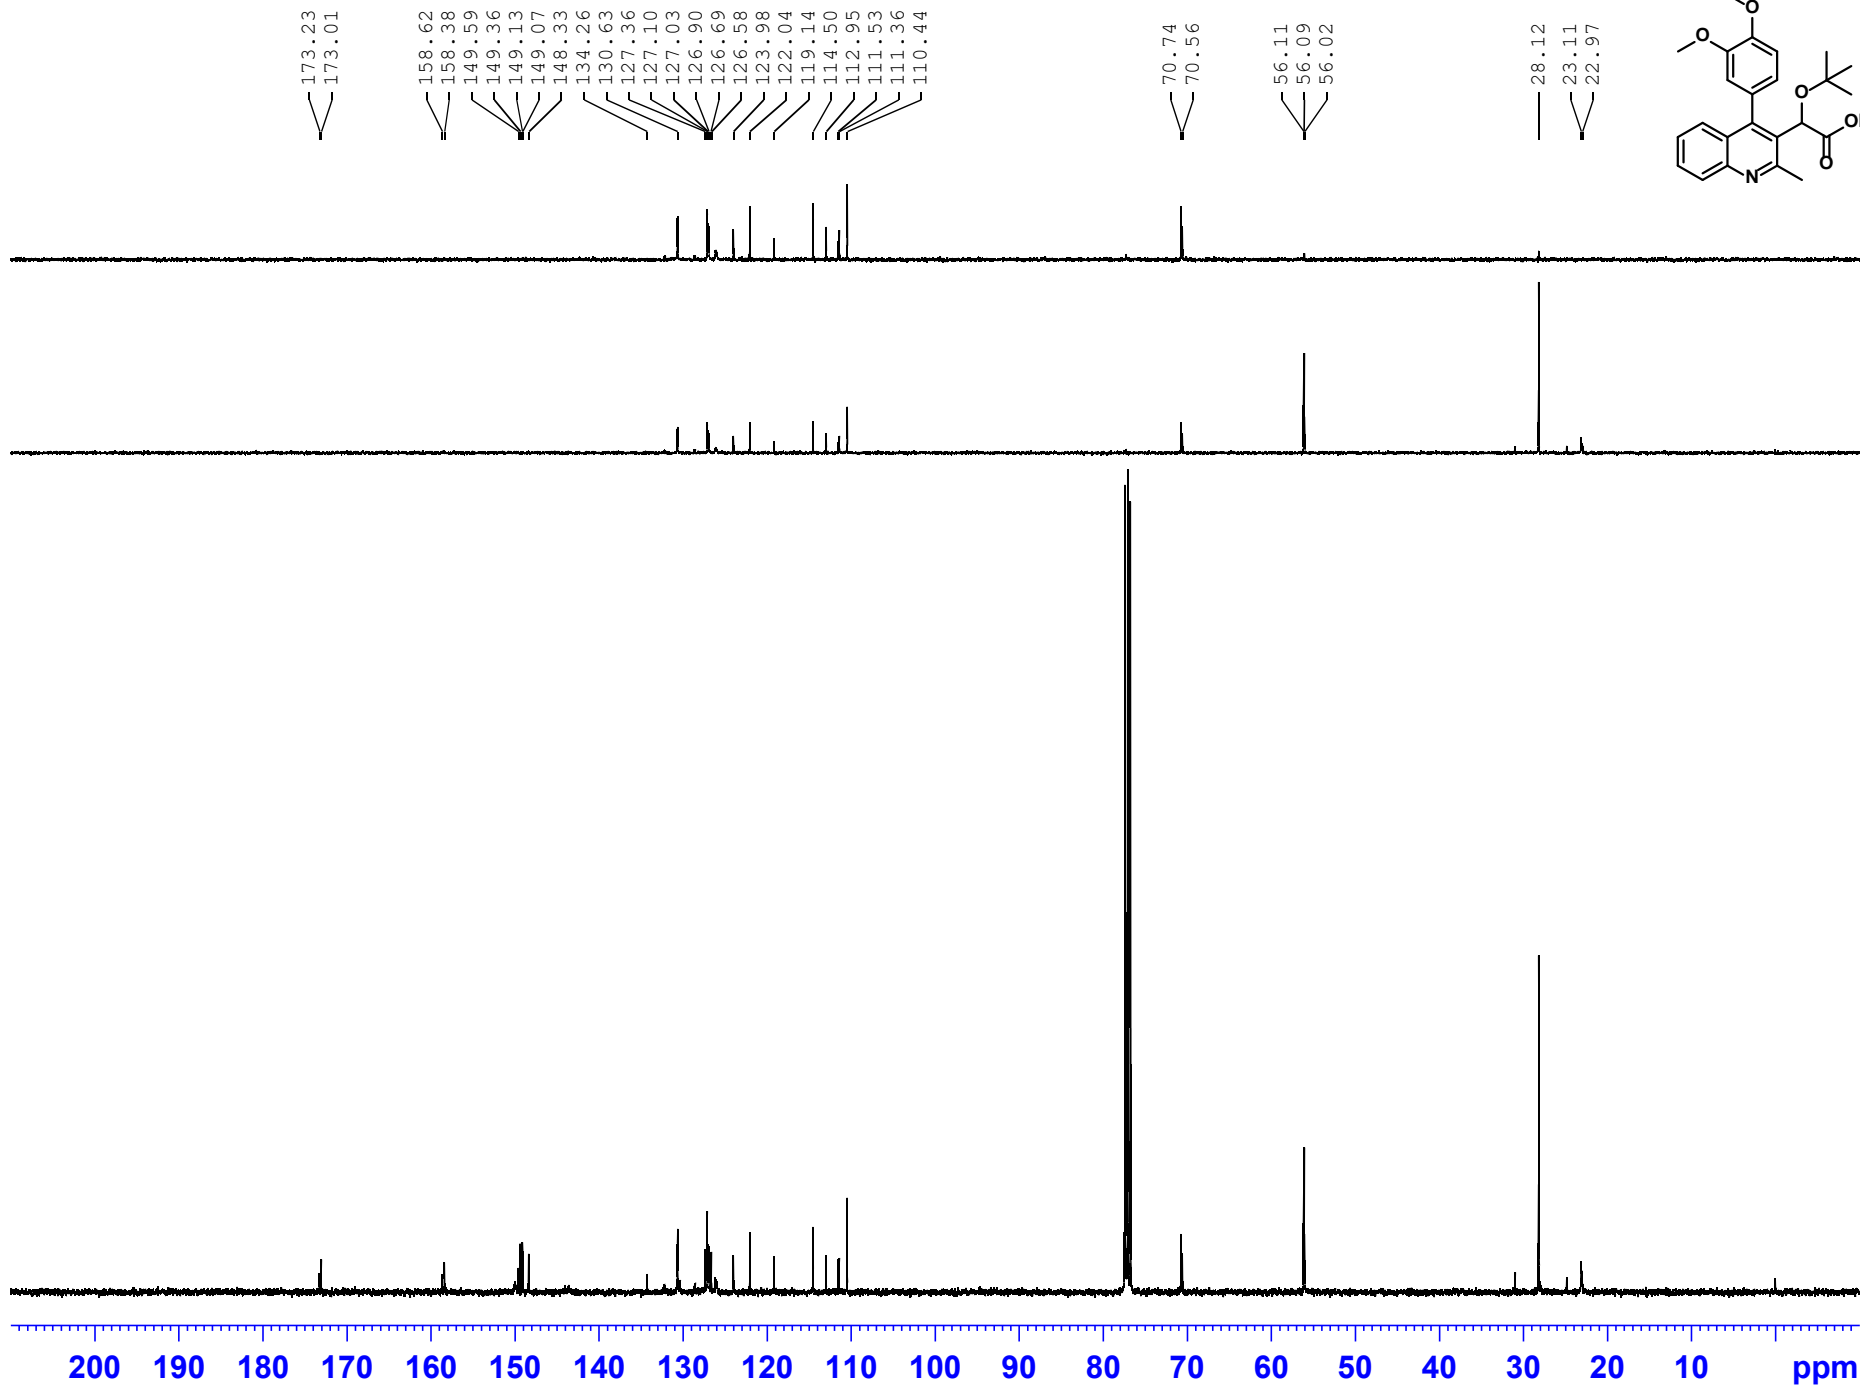

Supplement: ml8b00269_si_002.pdf [file ml8b00269_si_002.pdf]
